# Supplementary material for: A computational approach inspired by simulated annealing to study the stability of protein interaction networks in cancer and neurological disorders
Source: Springer Nature journal article supplement (doi:10.1007/s10618-015-0410-5), 2015-03-20
Supplement: MOESM1 [file 11710956]

**A Computational Approach inspired by Simulated Annealing to study the Stability of Protein Interaction Networks in Cancer and Neurological Disorders**

Data Mining and Knowledge Discovery

Kristina Ibáñez<sup>1,2</sup>, María Guijarro<sup>1</sup>, Gonzalo Pajares<sup>1</sup>, Alfonso Valencia<sup>2,§</sup>

<sup>1</sup>Departamento Ingeniería del Software e Inteligencia Artificial, Facultad Informática, Universidad Complutense, 28040 Madrid, Spain

<sup>2</sup>Structural Biology and Biocomputing Programme, Spanish National Cancer Research Centre (CNIO), 28029 Madrid , Spain

<sup>§</sup> **Corresponding author:** Dr. Alfonso Valencia. Tel: +34 917328000; Fax: +34 912246976;  
E-mail: [avalencia@cnio.es](mailto:avalencia@cnio.es)

**Protein Interaction Network Analysis (PINA) dataset:**

HDAC3 HDAC1  
S100B MDM2  
TAF1 TAF15  
PRKCZ GRB14  
HSP90AA1 CDC37L1  
JUP DSG2  
L3MBTL2 MEAF6  
COPS6 CUL5  
CCDC85B EXOC8  
TUBA4A RAB8B  
CHD3 ATP1F1  
UBE2D2 CHFR  
KAT5 POLR3F  
BLM SUMO3  
RPS27A SPRED1  
PRKAR2A RUNX1T1  
RPS27A SPRED2  
CBL F2RL1  
MDM2 UBQLN4  
RFC2 PHLDA3  
MAGEB4 FTSJ3  
PRKACA LIMK1  
ARID1A SMARCC2  
POLR1A ANP32B  
ATXN7 SUPT3H  
CLTC GGA3  
RARA SRC  
RALA RAB8B  
HRAS RGL1  
PHYH F8  
TP53 HSP90AA1  
PARK2 UBE2L3  
KITLG FLT3LG  
RNPS1 STRAP  
RCN2 NPTX1  
BRD4 GRB2  
ASNS PRKAG2  
SMARCA4 TAF9

ATXN7 TADA2A  
INPP5D DOK1  
PTN LUC7L2  
GABARAPL2 SAFB2  
PIN1 WRNIP1  
HSBP1 HSF1  
NFKB1 DDX46  
IL4 IL13RA2  
CAV1 NEU3  
DCN COL4A6  
GTF2F1 CKLF  
DSG1 KLK5  
KEAP1 ETF1  
RPN2 C20ORF24  
OGG1 XPC  
PTPN1 STAT5B  
CTNNB1 HDAC1  
ZNF512B EHMT2  
SMAD1 SMAD5  
SAFB2 SAFB  
NMT2 TP53  
HNRNPA1 SUFU  
DMWD SCRIB  
UBE2D2 RNF125  
LMNB1 URB2  
SPTLC1 C20ORF24  
PIAS2 ESR1  
PNKP MYOZ1  
BCAR3 ANXA2  
TSSC1 KIAA1967  
USP7 TRAF6  
BAZ1B SUPT16H  
GALK1 OTUD4  
ITGB2 TLN2  
SNRPF SRRM1  
GAK AR  
TIMM50 IKBKG  
RHOQ PRKCI  
PLCG1 PTPN11  
CDH6 CDH9

HNF4A PABPC4  
CDH6 CDH7  
TADA2A TADA3  
RANBP2 MDM2  
NF2 TSC1  
NCSTN APH1A  
NR2F2 HDAC1  
GABARAPL2 KEAP1  
APC HNRNPM  
PPL COL17A1  
RNASEH2A MKNK1  
PCNT RBBP7  
CTTN HDAC6  
TRAF2 TNIK  
EIF3D EIF3J  
EIF3D EIF3G  
TRAF2 APPL1  
GBAS GABARAP  
RAF1 RAP2A  
CST3 CTSL1  
SART3 LSM7  
HCK ADAM22  
PAX3 WWTR1  
PABPC4 XRN1  
ETS1 MAPK7  
PDPK1 IRS1  
PTPRF IRS1  
CTSG F2RL1  
MLH1 CASP3  
MAX CLTC  
NPHP1 FLNB  
CHRM2 GPRASP2  
YWHAB GAB2  
PIK3C3 MAP1LC3C  
TSC22D1 RB1CC1  
MED6 MED21  
LRP2 MAPK8IP2  
TH1L TTLL3  
MDM2 RASSF1  
APBB1 PQBP1

XRCC6 DHX9  
BCL6 HDAC7  
RPF1 UBE2D3  
RNF144A E2F4  
KLC2 MAPK8IP3  
PRPF40A PFKL  
USP36 WDR3  
BTG2 PRMT1  
CTNNB1 SOX17  
MEF2D USF2  
MAD2L1 MAD2L1BP  
HNRNPH1 NFKB2  
CREBBP JDP2  
MPDZ SSTR3  
WAS CRKL  
ITPR1 STARD13  
CRK KHDRBS1  
HSP90B1 EIF2AK3  
PRTN3 F2R  
YWHAG CGNL1  
MAPK3 SQSTM1  
VTN ITGB6  
DEGS1 NUDT21  
CRTAP WDR48  
ADCY5 GNAI1  
APOA2 APOD  
GABARAPL2 NEK9  
MAVS IRF7  
SRMS DMWD  
SUV39H1 SBF1  
SMAD3 RIT1  
PML PPARG  
RPS27ANUAK2  
HBP1 KIAA1279  
ACTB MYOC  
CIT DLG4  
NCOA2 PRMT1  
LAMA4MED31  
AR ACTB  
APBB1 DIAPH2

HSF1 FKBP4  
STAT5A ESR2  
SPINT1 FAM46A  
ABLIM1 VIM  
INHBA TGFBR3  
TK2 DRAP1  
MAPK1 CDX2  
HSP90B1 NR4A1  
TSPAN3 CLDN11  
MAPK1 FRS2  
TCF7L2 TNIK  
AIP CSNK2A1  
FOS BMPR1A  
NR3C1 FYN  
ARNTL CLOCK  
KCNJ2 DLG2  
RAB11B RAB11FIP1  
EBP EBPL  
INS SYTL4  
CCNE1 SMARCA4  
CCNE1 SMARCA2  
CEP55 VPS37C  
CST7 CTSL1  
RAD23A CDC37  
SEC61A1 AP1S1  
ESRRG PNRC1  
AQP1 PICK1  
ACTA2 TSC1  
BAZ1B PHLDA3  
EWSR1 NSUN4  
PFN1 APBB1IP  
AR RAC3  
FADD FAF1  
LIG4 XRCC4  
CTNNB1 PIN1  
KLKB1 SERPINA5  
GCM1 HDAC5  
VPS41 HOOK2  
PRMT5 HIST1H4I  
TANK USP7

PDXDC1 PHB2  
HSPD1 PRKACA  
TPST1 CMKLR1  
SNW1 NCOA2  
ANXA2 STAT6  
PRKCA ADRA1B  
MYH9 MAP3K3  
KRR1 USP44  
SMAD3 SMARCC1  
SCN4A INADL  
MET PTPRK  
SUPT3H TP53  
RAB27B RPH3A  
FN1 IGFBP5  
LYN PAK2  
CTNNB1 PRPF38B  
SNW1 TCEA2  
TPST2 SELPLG  
HIST1H4I CALCOCO1  
MAP3K1 HSPH1  
YWHAG CHAF1A  
LSM1 LSM4  
GFAP SH3YL1  
CASP9 CASP8  
PPP2R1A RAB7A  
PKM2 TRIM63  
CCNC MED19  
MCC PHB2  
PGK1 YWHAZ  
MEF2A MAPK14  
PSMD10 UCHL5  
EIF4B CAMK2D  
HSPA4L USF2  
ABCD4 PEA15  
SFN PKP3  
PDS5A BRF2  
SRC CDC37  
PDE4D PDE4DIP  
PTGS2 PSMD1  
OFD1 TRRAP

TEK PTPRK  
SNAP29STX17  
FANCA HES1  
LSM1 LSM5  
KPNA5 ANP32A  
ZNF24 KIF21A  
PRKCA HAND2  
CDC27 MAD2L1  
TIMM50 MAGED1  
GLI1 RAI1  
ITGB2 RABGAP1  
KIN RPA2  
ANK1 RHAG  
FXR2 RABAC1  
PCNA APEX1  
PCNA RPA1  
YWHAG AKAP13  
TIA1 SND1  
KIAA1009 CPNE4  
NCOR1 HSPA4  
SMAD1 PIAS4  
RBFOX2 RERE  
BRCA1 CTBP1  
CSF1R GRB2  
TNK2 ITFG2  
MCC MRPL32  
DAZAP2 UBAC1  
GBP1 FNTA  
CDK9 MDFIC  
PHF2 HIST1H3J  
S100A1 PLN  
CCNE1 BRCA2  
NTRK1 PTPRJ  
TP53 HDAC8  
GRIA3 GRIP2  
FBLN1 HBEGF  
TPT1 STEAP3  
YWHAG STK4  
RAP1A TRAF6  
SRSF4 RNPS1



ESR1 FKBP4  
SLCO1A2 PDZD3  
PPP2R1A MAP3K3  
HMGB1HOXD11  
BECN1 GOPC  
MAGOH RBM8A  
MEIS1 HOXA5  
DNM2 WIPI2  
NTRK1 RASA1  
BRD1 VIM  
IL2RB SHB  
SPIB E2F4  
MED14 MED6  
ACTB WASF3  
ARID1A SMAD3  
CD44 VAV2  
COL4A6 KLK6  
CCNA1 CDT1  
TRAF3 TNFRSF14  
RNF103 UBE2D2  
KDR PLXNA1  
STK35 SMURF1  
TRIM27UBE2W  
LYN PTK2  
SOX9 KPNB1  
PRSS23 ODF2L  
NEB MYPN  
ELANE ELN  
TSEN54TSEN34  
NCF2 GNB1  
GDF9 APLP1  
GRIK1 PICK1  
TGFB1I1 UBQLN4  
TNFRSF1B RPS27L  
VHL TRIM28  
GRK5 CAV1  
PTH2R PTH2  
SRF ASCC1  
ILF3 RRP1  
MCC DNM2

GSK3B DCTN2  
MAP3K7 SMAD6  
CLSTN1 PAX8  
CCDC141 DISC1  
OPTN CCDC53  
HCK RASA1  
OPTN RNF11  
ERN1 SYVN1  
COL1A1 TXN  
ASNS DDA1  
PAK2 EIF3I  
CD2BP2 EIF4A2  
CCDC85B ZNF165  
GABARAPL2 LRSAM1  
NDC80 PLDN  
KDM3BZNF512B  
E2F3 MYBL2  
PRKCA SCTR  
EIF3B EIF3A  
RFWD2 SIPA1  
RAP1A RAPGEF2  
USP8 CHMP4C  
EIF5A XRN2  
NFKB1 GSK3B  
NGFR MAG  
SYNJ1 SNX9  
SNCB CENPT  
TGFB1 FBXL12  
NAPA STX12  
PRKCD MEP1B  
MEN1 HDAC2  
HGS DCTN2  
FANCA CD79A  
UNC13B DOC2A  
SLC9A3R2 PHLPP2  
RPS3 NFKBIA  
GDI2 ATG5  
SRSF1 CIR1  
TPD52L2 IKBKE  
COPB2 ILK

ID2 PAX2  
BMPR1B OXSR1  
ALX1 ALX4  
ALDOB BBS7  
ELANE ITGAM  
PLAT LRP1  
TUBB4 MRPL28  
PRKCQ ATP13A2  
MED8 MED20  
PRPF40A HNRNPUL1  
RAD23B XPC  
ESR1 PIK3R3  
CHN2 SUMO2  
TCF3 DAXX  
SLC25A3 TRADD  
EWSR1 NBPF3  
YWHAG LCP2  
MDFI NPDC1  
HMGB1 ETS1  
PPP2CAPACS1  
POLE3 BAZ1A  
GRB2 AKAP6  
SCAND1 ZNF165  
PTPN13 FADD  
SIAH2 HIPK3  
RALGDS CNKSR1  
SNAI1 GSK3B  
PPP2R1A RAB11A  
HGS SNX1  
MCC GRB2  
XPO1 SMURF1  
MAP3K8 BMPR2  
CCDC88A NDEL1  
USP54 CHMP1A  
PICK1 LGALS12  
EPHB2 SH2D3C  
UBE2D2 RSPRY1  
RAB4A PIN1  
HOMER3 TRPC4  
TRAF2 CASP8AP2

NR1H3 TMEM161A  
OAT OTUD4  
HSD11B2 KAT2B  
HSD11B2 KAT2A  
ETS1 ARID4B  
TCEAL1 FEM1A  
DLST FLII  
GNAI2 GPSM2  
ITGB2 TLN1  
SFN RFWD2  
CKM PSMD4  
PRTN3 CAMP  
SLC2A4ARF3  
NT5E ACTB  
FAM173A LUC7L2  
TUBB4 TRAF1  
VCL PSME1  
CD34 CHST4  
TP53 PCP2  
MAN1A2 DAND5  
SKIL LRP1  
CSN2 CDC42  
SUPT5H H2AFX  
MAP1A PRKAG2  
TEAD3 WWTR1  
TAPBP COPG2  
CDK5R1 CDK5RAP1  
PTN CCDC53  
EHD1 EHD3  
YWHAG CAMSAP1L1  
CEBPB DDIT3  
CREB1 CCDC6  
MAPK1 PTPN7  
HMGB1 HOXD3  
PSMA4 PSMA5  
CAV1 MALL  
KRR1 ZBP1  
LCK NFKBIA  
SFN CYTH2  
PRMT2 NCOA1

NCK1 CDC27  
IRS1 HDAC2  
YWHAQ UCP2  
LHB GNAI2  
SELL EZR  
CCNA2 CDKN1A  
EXOSC10 EXOSC6  
CHEK1 MSH6  
RAF1 IL2RB  
PRLR CISH  
CCDC130 ZNF165  
CLTC TAB2  
SMAD2 DCUN1D1  
ARF6 XPO5  
RNF220 UBE2W  
KHDRBS3 RPAP2  
ARF6 CACYBP  
POU2F2 HMGB2  
APIG1 DNER  
DEC1 TP53  
DLEU1 ABCF3  
TUBG1 NDE1  
TOPBP1 ATR  
SULT1E1 EEF1A1  
GATA4 CRIP2  
RPA1 RAD51  
TPPP GSK3B  
EIF4A2 EIF3M  
RNASEH2A NFE2L1  
UBE2M FAM113A  
AGRN GF11B  
KIAA0776 UBE2W  
LONP1 IFIT5  
PYGB ACTN1  
DNM2 SHANK1  
PRKCG YWHAB  
ESR1 IRS1  
HSP90AA1 DAP3  
PQBP1 TXNL4A  
HIRA MEF2D

COG3 COG1  
CTBP2 MDM2  
SMR3B MUC7  
CALR ELF3  
GATA4 NKX2-5  
LSM1 PTPRC  
TSC22D3 HPCAL4  
HNRNPUL1 MED31  
TUBB4 MAP3K1  
HNF4A SMAD4  
SMC5 ASF1B  
VDAC1 TUBA4A  
SMARCA2 SMARCC1  
MYF6 CALM2  
LSM10 STRAP  
ICAM1 UBC  
PLXNC1 SEMA7A  
GCLC NUMA1  
RAD23A EEF1A1  
SMARCA2 SMARCD2  
EP300 MYST3  
RASGRF2 PMVK  
EP300 CREBBP  
FKBP6 CCNK  
TYROBP TREM2  
SIX3 NR4A3  
SORBS3 DLG5  
ATP5A1 AIMP1  
NGFR MAPK3  
SPTLC1ABCA1  
VIM ING5  
CDK9 CCT4  
CDK9 CCT8  
CASP8 MAP3K14  
KLB FGF21  
DIS3L EXOSC3  
ATF2 UTF1  
CDC5L CWC15  
ERBB3 TNS4  
KRT5 ALOX12

PRRX1 GTF2I  
SMARCA4 HIST3H3  
TCP1 CTTNBP2  
MSH3 RPA4  
MLL2 KDM6A  
DSG1 PKP3  
YY1 RYBP  
HDAC3 IKZF1  
SNAP23SNTG1  
TGFB2 STRAP  
PLEKHA2 PLEKHA1  
SIGIRR TRAF6  
NUP214NFX1  
PSIP1 SUB1  
CDH1 CSNK2A1  
SMAD7 HDAC2  
HNRNPK H3F3B  
NR4A1 ARHGEF10L  
FGR ABI1  
ACTN1 MYOZ2  
TUBG1 GTSE1  
UBC DEPDC1B  
CGA PTN  
CDK14 YWHAB  
NID1 LACRT  
TCF3 NCL  
GRB2 LCP2  
POLR1E MYO1A  
TRIM27EIF3E  
NSF C14ORF1  
ITGB5 DOK1  
GRIN2D DLG2  
PLXNB2 MST1R  
CREM CREBBP  
TCEA2 SH3GL2  
SH3KBP1 TJP2  
AURKACDKN2A  
IFNGR1JAK1  
GNB2L1 SLC6A3  
SKIL DHX30

HSPB3 MED31  
RHOD SMAD2  
NSMAF MAP1LC3B  
STOM ATIC  
PNP C7ORF64  
GRIN2B ERBB2IP  
NUP214HDAC9  
GRB2 PDIA2  
COPS5 CUL5  
POLR2C MED9  
RAE1 WDR75  
SMARCA4 HIF1A  
BCL3 SHC1  
YWHAG MADD  
HUS1 RPA2  
EIF2S3 PRKAB1  
ZNF768 ZNF277  
CDK4 RPRM  
PRRC2A CPSF1  
HAP1 EIF3E  
SRC TRPV4  
DFFA TMBIM4  
RPA2 MCM5  
RPA2 MCM4  
CLPX CLPP  
ZNF512B BTBD2  
PCNT DYNC1LI1  
TTN ASF1B  
PRKAR1A PRKAR1B  
RNF150 UBE2D4  
FASTK RBPMS  
GABARAPL2 RCN2  
OFD1 LUC7L2  
CD19 CD81  
RASSF4SAV1  
E2F1 MGA  
PRPF40A ATAD3A  
FAM107A CTPS  
PNP TFAM  
GNAO1 GNAI1



ACTG1 ATF7IP  
PRKCE GNA12  
EP300 PROX1  
BCAR3 AHCY  
MAPK3 MAPK8  
SDC2 LAMA3  
PTPN11 DOK1  
CDK1 BRCA1  
G3BP1 PIN1  
OS9 EGLN1  
SLC25A12 JUND  
ABCA1 LMO7  
MAPK8 CRK  
MAPK8 CRKL  
EIF3G MPP6  
LYL1 DRG1  
EMD YTHDC1  
NKD2 RNF25  
TRAK2 TRAK1  
TERF1 WNK1  
FZD5 GOPC  
COL4A2 BGN  
ACTA1 MINPP1  
LAMA5 CRKL  
MAPK14 ATG9A  
IGF1R KL  
PTGES3 TRAF6  
COL2A1 THBS1  
NCOA1 PRMT1  
PRKAR1A PRKACA  
DLST SCFD1  
MED24 RXRA  
GABARAPL1 TMEM160  
PPP1R12A YWHAZ  
GTPBP3 FAM60A  
KCNH4 SNCA  
TFE3 PPP2CB  
SOAT2 ATG5  
TNFRSF1B EPPK1  
NOS1AP LRP8

MYB COX7B  
IER3 PPP2CA  
PSMB1 PASK  
FBXW7 PPARGC1A  
DMD DTNA  
PTPN11 INPP5D  
RPS27A PJA1  
XPO1 IKBKG  
HOXC13 NR2E3  
NR3C1 EIF4A2  
EP300 ESR2  
SMAD3 KAT2A  
SMAD7 MAP2K6  
SMAD3 KAT2B  
PRKAR2A AKAP11  
HDAC1 DDB2  
UBE2E1 MARCH3  
KIAA1267 CEP70  
EIF4G2 MAPK6  
SPTAN1 DAXX  
YWHAB AKAP13  
NCK1 NR5A1  
AGGF1 PLDN  
RUNX1 SIN3A  
ZNF24 HAP1  
NASP IKBKE  
BCL3 RELB  
ATXN7 TAF5L  
ATXN7 TADA3  
TOP1 CDT1  
MCC MAP3K3  
CDC42 ARHGAP10  
PTTG1 CDC20  
TADA2A KAT2B  
TADA2A KAT2A  
ERCC3 PSMC5  
DLG4 CACNG2  
NPC1 RPS27A  
SAP30 RBP1  
MGRN1 UBE2D1

F2RL2 INADL  
TMEM63A EEF1D  
RAC1 MAP3K11  
TNFRSF14 RUVBL2  
CTNNB1 CDH18  
ZBTB16ZBTB32  
LIG4 ATM  
CLDN3 PRKACA  
DMD PGM5  
PRKCD FSCN1  
BRCA1 PIAS4  
VIM RIBC2  
HGS NF2  
HSP90AA1 UBE2N  
PRKCZ SLC39A1  
RARA MED25  
GRB2 ANK2  
YWHAG SRSF6  
KIAA0232 WNK1  
TEK ANGPT1  
VTN HGF  
EZR IQGAP1  
PSMC2 NDRG1  
ZBTB16COQ6  
BMX RUFY1  
CEBPG RPS27A  
TP53 CCDC106  
MDFI AASDHPPT  
UBE2I TNRC6A  
ZNF629 TCEANC  
MAGEA11 ARHGAP29  
YWHAE C16ORF48  
TP53 PPP1CC  
ABL1 MED25  
KCNJ2 KCNJ8  
NPM1 NCOA6  
ZW10 PTP4A3  
HAUS6 HAUS2  
PRMT2 SCARB1  
TACC2 YEATS4

NPM1 RRP1  
TNRC6A WNK1  
BARD1 EWSR1  
PARK2 MAPT  
ASS1 ARAF  
MYC MMS19  
COMT XRN2  
G2E3 WDR6  
SLC25A37 EWSR1  
PELI3 IRAK4  
ITGB2 VAV1  
CPSF6 EWSR1  
CDC25A SMAD3  
FAR1 GSTK1  
ITGB4 CLCA2  
LTN1 HES4  
ACTL6A MYC  
MED25 MED15  
TIMM50 RIPK3  
CCT5 MAP3K3  
POLR2C MED29  
FYB LCP2  
MAF SOX9  
HTRA2 TNFRSF14  
CYP11A1 SMAD3  
RAC1 NCKIPSD  
BTLA VTCN1  
CALM2 TNIK  
PHLPP1 SUGT1  
N4BP1 ITCH  
HDAC2 DAXX  
PIP5K1B PIP5KL1  
COIL MAD1L1  
AP2S1 PAK7  
SRGN PRF1  
COL4A2 KLK6  
CENPB GF11B  
EIF2S3 TRAF6  
LHX1 RLIM  
HES1 HEY2

PML TGFBR2  
SRC FCGR2B  
SRC FCGR2C  
DVL1 ARRB1  
YWHAG PAK1  
MYCBP2 BAK1  
CTDSP2 SNAI1  
TGFBR1 FBXO34  
APC SPTBN1  
TAF12 TAF15  
PKN2 WDR20  
CCDC85B CCDC116  
PELO RUVBL1  
CASP9 NLRP1  
TNFRSF1B HSPA9  
SKI PML  
ENO2 HK1  
HIST1H4I PARP10  
NFKBIA RWDD3  
HDAC4 ZBTB16  
YWHAG PPFIA1  
WWP2 NDFIP2  
AES GF11B  
ANAPC7 CDT1  
MMP2 COL7A1  
MPDZ SYNGAP1  
C19ORF57 COPS4  
RNPS1 LUC7L2  
RNPS1 THRAP3  
PPP1R16A CXORF26  
PPFIA1 GRIP2  
EPC1 EZH2  
ESR1 TOP2B  
SLMAP STK24  
LAMA5 COL7A1  
HGS RIN1  
NFYA KPNB1  
FSHB FSHR  
NSF PTPRO  
ZEB2 MTA2

EWSR1 WWP1  
RXRA GATA2  
TSG101 TRAIIP  
MED26 MED27  
KNG1 CTSS  
GTF2F2 BAG6  
PDPK1 YWHAQ  
GTF2E1 IKBKG  
ZBTB25 MAPK9  
GNA12 MAP3K5  
SPTAN1 MAP3K3  
NCK1 BCAR1  
FUCA1 VAV2  
HNRNPC NFKB2  
NFKBIE ANKHD1  
YWHAG PKP2  
CXCR3 CCL7  
TCEA2 GRIPAP1  
FAM100A MED8  
HBP1 EWSR1  
MCC PDCD6IP  
MCC TKT  
TFE3 PSMA3  
SOX1 STAT3  
OAZ1 RPS27A  
PRKAG1 CAMKK2  
NFKBIA PCBD1  
BCL2L11 RPS27A  
RAC1 TUBA4A  
RPS3 HSPA4  
BNIP3L BCL2  
HDAC5 PRKAB1  
CASP7 STK24  
TLR4 LY96  
TRAF3 TANK  
FN1 ITGB1  
PDCD6 IGFALS  
MAGI3 MED28  
TNFSF11 MAPK8  
ZBTB16LSM2

IKBKAP SDHAF2  
SRF SRC  
GRB2 PAK1  
CREBBP CITED1  
FTH1 SREBF2  
HDAC5 NR2E1  
CACNB4 SYT1  
SLC25A6 KARS  
HDAC5 DYRK1B  
CREBBP CITED2  
EWSR1 RNF183  
PPP2CB SGOL1  
SMAD9 VCIPI1  
CREBBP SH3GL1  
AGXT PEX5  
ATG12 MAVS  
SSR3 PHLDA3  
SMAD2 STAMBPL1  
PSTPIP1 SCG5  
UPF3B EXOSC4  
RAF1 PKM2  
EFNA1 EPHA5  
GABARAPL2 DYNC1H1  
MLH1 UBAP2L  
GRB2 MAP2K5  
NDUFA4 TSC22D1  
PTH FEZ1  
USP9X MARK4  
STX7 VPS16  
MAP3K8 TUBA3C  
RPS6KA3 PLD1  
AP2B1 AP2M1  
RXRB TMEM57  
CRYBA1 CRYBB2  
PSMA4 RPS27A  
POLR2H RPAP2  
C20ORF24 SSR3  
FEN1 ARHGDI1  
SLC38A1 RBM17  
BMPR1B STAMPB

DOK2 INPP5D  
NR2F2 SQSTM1  
STX7 VPS11  
CDKN1B CDC34  
UBE2I MAPK1IP1L  
MAPK10 HDAC1  
TCERG1 MED21  
HDAC5 AHRR  
YWHAG AKAP9  
ILF2 ILF3  
MARK4PARD6G  
RECQL4 EP300  
AURKACDC20  
CDC73 ASH2L  
CTNNB1 ARHGAP32  
EWSR1 NTNG2  
ORC4 MCM2  
LTA LTB  
KRT18 TUBG1  
EGFR GABARAPL2  
HDAC2 ZFPM2  
CP MPO  
DR1 DRAP1  
SEPHS1 C2ORF18  
SDC2 REG3A  
ACADM USP20  
MYCN CHRND  
TRAF5 TRIM37  
FES BCR  
MCC ARX  
YWHAB HDAC5  
YAP1 TP63  
HNRNPH1 HNRNPH2  
RHOA GNA12  
PKLR USP3  
BMPR1B AMHR2  
YWHAE C15ORF29  
SDCBP TGFA  
FSTL1 INHBA  
PLCG1 BTK



CDK1 PPP2R1B  
CDK1 PPP2R1A  
TFRC CD247  
GTPBP4 LYAR  
CACNB4 FASLG  
MYST2 ATN1  
NAP1L1 MDM2  
MYCBP2 MAPK6  
TP53 BTBD2  
YWHAB CAMK2A  
PVR DYNLT1  
VEGFA HSPA4  
RASL11B EWSR1  
SPINK1 CTSC  
PRKCA AVPR1B  
KCNQ1 PPP1CA  
SMAD9 LEMD3  
COL6A1 MAG  
PAICS NUDT18  
PIK3C2B SFN  
GRB2 IK  
PAWR SLC5A7  
AKAP3 ROPN1L  
RPL35 CNBP  
SRC YWHAB  
MT-ND4 DAND5  
GTF2F2 ATG3  
DNM2 PRKAB1  
MED25 MED19  
PARP1 HDAC1  
RHOA CAV1  
AP2A2 SHC1  
CD19 CD82  
TOP1 CSNK2A2  
MCM2 TCEA2  
CANX MBTPS1  
PDILT ERO1L  
ATF3 NFKB1  
MLH1 TRIM29  
GATA1 TAF7

MTOR FBXW7  
EGFR MAPK1  
BMP7 ACVR2B  
UBE2H DTX3  
ARFRP1 CYTH1  
SMAD9 PLEC  
FLOT1 NGB  
HARS TRAF6  
ZNF512B PAPPA2  
SIN3B SUDS3  
PSMD11 PSMD13  
SNX1 VPS35  
EFNA1 EPHB1  
EFNA1 EPHA4  
PSTPIP1 RPL36AL  
FN1 COL6A2  
KRT85 CDC20  
FLNC KCND2  
PQBP1 EEF1A1  
F7 IKBKG  
IL1B CASP4  
PFN1 GPHN  
HDAC2 GATAD2B  
TMF1 GFI1B  
CTBP2 TEAD3  
PKM2 NDRG1  
OFD1 RUVBL1  
LCK STAT5A  
SGK1 HNRNPL  
GRB2 SOS1  
RPS27ARNF144B  
ZBTB16EPN1  
DCX PAFAH1B1  
NFKBIE JUP  
DNAJB1 SEC61B  
RAC1 ARHGAP15  
UBE2D2 DTX3  
LCK STAT1  
CCL2 CCR3  
MAPK14 YY1AP1

CDC42 INPP5F  
VPS16 VPS11  
AMBP ALB  
KRT31 STK38L  
SPRR2A CTTN  
CCL2 CCR5  
IRF1 SUMO1  
CDKN2A ZNF410  
PRKAR2A AKAP13  
RPS27ACDT1  
MAX SMAD3  
ARPC5 ACTR3  
MAP2K7 DUSP22  
GLB1 NEU1  
MAX HNRNPU  
CKLF HDAC2  
SEMA7A FYN  
HSPA5 HSPBP1  
CFL1 TPI1  
LDLR PF4  
EP300 RAD50  
NRAS BCL2  
FOS TPR  
LRPPRC GABARAPL2  
ARPC5 ACTR2  
HSPA9 MAP3K14  
ARRB1 RTF1  
ZNF512B ZMYM2  
GNAI2 GPSM2  
ITGB1BP3 ST7  
UBE2D1 RLIM  
FGR FASLG  
MET CTNNB1  
RAC1 ABI2  
FECH USP20  
HAND1 PRKACA  
HLA-A LILRB2  
ESR1 THRB  
PTPN3 YWHAG  
ESR1 THRA

EP300 NEUROG1  
CLTC TANK  
AURKARAB10  
IRS1 CSNK2A1  
SMAD9 SVEP1  
SIRPA IL1RAP  
SFN REPS2  
NFKBIA IKBKG  
VIM C7ORF64  
PTH PTH2R  
PRKAR1A SMAD2  
CBL SH3KBP1  
RBL1 SMAD3  
PIAS2 GTF2I  
SLC38A1 UBE2D3  
STAT3 BMX  
NPHP1 NPHP4  
HDAC2 DDX20  
FANCA ERCC4  
SPTBN1 MAP3K4  
PTPN11 FRS2  
ACTL6A ING1  
TNFRSF17 TNFSF13B  
KRT85 MLST8  
BCR IRS1  
FBLN2 COL4A3  
PABPC1 PXN  
MYBL2 SKP2  
ITGB1 ICAM4  
ARRB1 MAP4K3  
ESR1 LCOR  
ADRB2 SLC9A3R2  
GRB2 IL5RA  
PLK4 MTUS2  
CPE POLA2  
EIF4E MKNK1  
CBL LAT2  
OXSR1 WNK4  
PPP1R13L TP63  
ACTA2 CREBBP

SMAD3 EBI3  
GYPC EPB41  
NR4A2 RAN  
EFNA4 EPHA7  
UBE2H POLM  
NBN CHEK2  
ZFYVE9 PPP1CC  
COX4I1 IKBKE  
CASR CHD8  
L1CAM CNTN2  
BZW1 EDEM1  
BRCA2 MCPH1  
ANAPC7 ANAPC1  
MED6 CYP27B1  
GRB2 SOS2  
TPM3 HSP90AB1  
ATF2 MAPK8  
LYN CHST15  
F2 CPB2  
ATF2 MAPK9  
SKI SPI1  
GADD45G KIAA1377  
TPR SHC1  
LMNB1 HLA-B  
CTSD MAPK1  
PRPF40A CDK12  
CSNK2A1 SREK1  
MYEF2 PPARGC1A  
CYP27B1 EP300  
POLR2C MED17  
RAF1 RRAS  
KRT5 DST  
SPP1 UBQLN4  
EGFR SOS2  
SIAH2 SNCA  
ABI2 ADAM29  
ZFYVE9 TGFBR1  
PTEN MAGI2  
CREB1 GTF2A1  
HIST1H2BB ERCC6

RADIL LITAF  
PAK2 PIN1  
ESR1 SP3  
SNRPE STRAP  
AP3S2 AP3M1  
UBE2D2 RING1  
F7 GGCX  
AIRE FYN  
GRIK3 LGALS12  
BUB1 CDC20  
HDAC3 DAND5  
RPA2 TUBB2A  
REG1A REG3A  
PTPRC CD28  
TRAF3IP1 TAB2  
ITGB4 YWHAQ  
TFE3 CLTC  
NFKB2 DHX9  
FBL ILK  
PTP4A2 USF2  
FZD7 UBQLN1  
YWHAG CKAP2  
GFAP MYO15B  
LCK DOK3  
SYNJ1 SH3BP1  
TAPBP SEC14L3  
CBFA2T2 TAL2  
TAPBP TAP1  
FADD HIPK3  
NKX2-5 JARID2  
IKBKB TRAF2  
ITPR1 TRPC6  
CNBP PURA  
ATXN7 KAT2A  
CDK4 VTA1  
ATN1 RCHY1  
DYNLL1 PAK1  
PDC YWHAZ  
GRB2 MS4A2  
ITFG2 KPTN

RB1 AR  
CDH1 ITGB7  
MAP3K12 RAB11FIP4  
GTF2H1 KIF13A  
DAPK1 UNC5B  
POLR2E IKBKG  
JAK2 ERBB3  
UNC13B TOE1  
DLG4 SHANK1  
EGFR SOS1  
IL2RA IL2RB  
GBAS HK1  
MGRN1UBE2E1  
PARP1 SREK1  
KRT18 YWHAE  
CDC42 MARK4  
PLSCR1DAZAP2  
HNF4A MED21  
VIM CASP9  
CCT2 STRN3  
VIM CASP7  
RBBP8 IKZF3  
DDX5 IKBKE  
VIM CASP6  
SNW1 NCOA1  
C20ORF195 PDLIM7  
CCNE1 CDT1  
EIF3M TRAF6  
RGS12 EEF1A1  
SMAD9 ARHGAP9  
NFKB1 TUBB6  
AURKAUBE2N  
SMAD6 RPS27A  
CLIP1 RAC1  
THBS1 COL5A1  
VHL SAR1A  
DAPK3 UBE2D3  
HSP90AA1 HCFC1  
MAPK1 CEP55  
ITGAV SPP1

CRP MAPK3  
SNW1 SMAD2  
UQCRC1 SNRPF  
HLA-B MCM7  
CSNK2B CTDP1  
PRKCQ CISH  
HSP90AA1 IRAK1  
RNF103 RPS27A  
TLX2 POU2F1  
EIF4E STUB1  
SGK1 FOXO3  
GNAO1 CACNA1B  
LYZ PARP11  
EP300 KAT2A  
FGF2 CASP1  
EP300 KAT2B  
GABARAPL2 FNIP1  
AVPR2 ARRB2  
DAND5 SKIV2L2  
GSTZ1 FYN  
PRKDC XRCC4  
DDX3X SREK1  
MPP3 PLK2  
SNCA GABARAPL1  
ATF2 ZDHHC17  
NR3C1 ZNF496  
EP300 DDX17  
ABL1 GSX2  
CHMP6 CHMP4B  
ETS1 SMARCA2  
GBAS PARP1  
YWHAG LMO7  
RB1 FOXM1  
RAD21 SRRM1  
NTRK1 RGS19  
FXR2 FTH1  
MAPK6 RANBP9  
POLR2C INTS10  
LRSAM1 MUTYH  
RNF165 UBE2D4



ATN1 LENG8  
UBC DAPK1  
PTPRF PTPRD  
CDC25C PPP2R5D  
MYO1CPTP4A3  
TRAF3IP1 ABI2  
RNF32 EXOSC1  
TLK1 ASF1A  
HCK VAV1  
THOC7 MED8  
FOXL2 SMAD3  
SKP1 CACYBP  
FLII DLST  
MED6 EHMT2  
SERINC3 VDAC3  
SNRPE SF3A2  
TERT HSP90AA1  
HIST3H3 NCOA3  
TERF1 TRIOBP  
MLL2 SMAD9  
RECQL5 ITGB3BP  
PIK3C2A ATG7  
CPSF4 SLC12A9  
CIT GRIN2D  
ACTB SSH1  
CSNK2A1 HIF1A  
RASSF2STK4  
RBBP5 PAXIP1  
DVL2 ZNF250  
CD19 CR2  
CUBN SCGB1A1  
RPS27A GAN  
HDAC2 MBD3L1  
CSNK2A1 IFI16  
SH3BP5MAPK10  
SH3BP5MAPK12  
SMAP1 SMURF2  
CCDC93 TRAF3IP1  
CALM2 TBK1  
B3GNT9 MDFI

TRAF5 TNFRSF14  
TRAF1 HSPA1B  
ENO1 MAP2K5  
TOM1L1 RAB18  
PSMC4 CMYA5  
MED21 ZSCAN1  
EGFR TNK2  
HSPB1 CRYBB2  
CD8A HLA-G  
DCTN1 BZW1  
HSPA5 STMN1  
AP2A1 APC  
RPS27AKCNH5  
VAMP2 STXBP2  
PDE6D GRK7  
VAMP2 VAMP3  
USP8 KRT31  
VIM DIS3L2  
CREB3 EMD  
IFIT5 CDC37  
CRYABCRYGC  
SEC13 TAB2  
CDK6 CDC37  
SGTA HSP90AA1  
NACA WNK1  
ESR1 ESR2  
UBE2H RNF10  
PTPN11 PILRB  
PTPN11 PILRA  
AIRE SRSF2  
IPO13 RBM8A  
MCM3 DBF4  
POLR3G POLR3D  
FYB CBLB  
PPP2CAPPP2R5A  
ANKRD28 PPP6R1  
PPP2CAPPP2R5B  
KIF1B GIPC1  
CPEB1 DYNLRB1  
KDELR1 ARF1P1

SKP1 DDX19B  
DAND5 HIF1A  
RECQL5 UBR5  
GOLGB1 ACBD3  
SPTBN4 DISC1  
PRKAB2 AGL  
PIK3R1 APOL5  
SERPINB9 UNC119  
UBE2K SIAH1  
AIFM1 UBASH3A  
RGS19 GIPC1  
IKBKB IRAK1  
MAPK3 BLVRA  
TNFSF10 TNFRSF10D  
RPS27A TRIOBP  
KBTBD7 C14ORF139  
NFKB1 TUBB2B  
SREBF2MSL2  
NR4A1 NCOA2  
HLA-A SSR4  
ZBTB44SMURF2  
CHEK1 XRCC5  
RAP1A RASGRP2  
FBLN1 ECM1  
PTGES3COPG  
CREM HDAC1  
ATF1 CSNK2A1  
BUB1B HDAC5  
AVP MLL  
MCM10RPAP1  
NUP98 GRB2  
NFKBIE HSP90AB1  
LSM1 LSM2  
CREM CAMK2G  
CAPN1 TINAGL1  
NHP2L1 POLA2  
TP53 GNL3  
MPG LRRC59  
CREM CAMK2D  
PRTFDC1 EWSR1

SNRNP40 DDX23  
GRB2 TNK2  
RTKN GOPC  
ZBTB16NCOR2  
MAPK8 SIRT1  
POLR2C MED27  
UBE2K MKRN2  
CDK2 CDKN1B  
CCT5 SRRM2  
SMNDC1 DDX50  
CTSG CASP7  
CCNB1 HIST1H1A  
MLLT3 BCOR  
MSX2 DLX5  
NLRP3 PYCARD  
BRCA1 POLR2K  
MAP3K7 TRAF3IP2  
SKIL CDC27  
CPE PMCH  
TTI1 PRKDC  
IRF5 TRAF6  
SNCG MAPK3  
LGALS3 PDCD6IP  
CBX4 CTBP2  
LRRFIP1 MYD88  
OPRD1 GNAI1  
LGALS3 GEMIN4  
TNFRSF14 PFDN2  
ITGB7 EPS8  
TGFB1 CRIM1  
KDM1AUNC119  
LIMK1 MAPK14  
ABL1 BTK  
TERF1 TNKS2  
AP2B1 DHX58  
CRADDC14ORF1  
GATA1 SMARCC2  
POLR2E POLR2F  
SYNJ1 SH3GL1  
ESR1 CREBBP

ESR1 MYST3  
SYNJ1 SH3GL3  
MCM7 CDKN1B  
MCC PPP2CB  
MRPL15 TRIM63  
FYN SNCA  
HIST1H2BB UHRF1  
SMAD4 KPNB1  
ATXN1 YWHAE  
SMAD4 GPNMB  
DDX54 LYAR  
PCBP1 TSC22D4  
KRT10 EVPL  
MYO1BMAP3K3  
AHSA1 HLA-B  
MBP CTDSP1  
MPL ATXN2L  
SHC1 CSF3R  
FMR1 RANBP9  
ANKRD13A RNF11  
SPTAN1 TES  
VHL OTUD7A  
RNF41 UBE2Z  
DDIT3 CEBPE  
GSN PSMD4  
HSP90AB1 PSMB5  
ABL1 HSP90AA1  
SUMO1 SENP1  
UBE2B POLQ  
TPR APC  
SNAP23STX1B  
SDCBP GRIK3  
SFN MAP3K5  
SDCBP GRIK2  
IPO7 TRAF6  
SMAP1 BRF2  
YWHAG PRMT1  
SNRNP200 MEPCE  
CHD3 CRCT1  
SRSF4 SF3A2

CASP4 SSR4  
EPB41 ATP6V1E1  
COPE TSG101  
KDR BMX  
LYST CENPJ  
CD2BP2 PSMF1  
NRAS SMURF2  
FGA PRRC2A  
UBE2N CHFR  
UBE2N RNF125  
PDPK1 PRKCZ  
TOP2A SUMO1  
YES1 CD2AP  
SLPI ZBTB16  
ANXA2 PCNA  
LHCGR ARRB2  
MAPK10 UNC119  
MUSK RPS27A  
NCOA7 GABARAPL1  
UBE2L6 MUL1  
HLA-A PRKCA  
RPL10 TBPL1  
DLST RUSC2  
EIF3H PRRC2B  
TOP1 BTBD1  
FZD7 UBQLN1  
CD4 CXCR4  
SAP30 HIST1H2AL  
CIAO1 MYO1D  
PTGDR GNAS  
CAPNS1 ARR3  
ITGA4 MADCAM1  
RPL18 MAP3K14  
ZNF655 C12ORF11  
CSNK2A1 STX1A  
OGT FBXW11  
ZFYVE9 ANKLE2  
DNM2 SH3GLB1  
SF3B1 YWHAG  
HNRNPM MAP3K1

ITSN1 TSG101  
CFL1 HSPH1  
TARS UBA5  
ORM1 SERPINE1  
TNFRSF14 SLC25A22  
GJA1 MAPK7  
SNRPE LSM2  
SGK1 CDC37  
HLA-B GARS  
TLR1 TLR10  
SIKE1 STK24  
PSMA4 CSNK2A1  
RPL13 MAP3K14  
PIK3CGPTPN11  
EP300 KAT5  
STAT2 CXCR4  
RPS6KA5 ATF2  
DVL1 EPS8  
HSPA5 TAB2  
UBE2D2 RNF25  
SEC14L2 PIK3CG  
RAC1 MFGE8  
YWHAH HNRNPD  
DAND5 PARP1  
VAPA USP20  
C20ORF94 COPS7A  
SRPK1 SREK1  
AIMP1 MAPK14  
CD3E UNC119  
TUBB4 REL  
EPB41L2 YWHAB  
HOXC11 DAND5  
IPO11 TRAF2  
LHCGR CHST9  
RAB11FIP4 RAB11FIP5  
PPP2CBMOBKL3  
STAM MED28  
ATIC TRAF6  
GNAS RIC8A  
PRKRA SETDB1

TOP1 CDKN2A  
TGFB3 FMOD  
PTP4A3 HNRNPM  
SMAD7 UCHL5  
LCK PXN  
LCK PI4KA  
EGFR FN1  
TP53 CABLES2  
RPL13 CDC5L  
RAF1 ARRB2  
ATF7 TAF12  
SERPINE1 MMP3  
DNAL4 DYNLL2  
SNRPD3 SREK1  
SUMO2 PHF8  
HDAC3 GPS2  
ZBTB8B CEP70  
ERBB2 PTPRZ1  
ERBB2 PTPRG  
CYP27B1 MED13  
FYN SUV39H2  
PABPC1 WWOX  
RAG2 RPS27A  
NR1H2 SRC  
ITSN1 STON2  
SMAD9 SNRNP70  
ADRA1D SNTG1  
RB1CC1 MOBKL3  
NKX2-5ID2  
ACTA1 MYO6  
UBC RPF1  
RAB3GAP2 MAP1LC3A  
CTNNB1 SMAD4  
TLE1 BARHL1  
ERBB2 PTPRB  
HSP90AA1 CSNK2A1  
LCK PIK3CA  
FLT1 PIK3R1  
AIRE SMC3  
HLA-B EIF2S3



MAPK3 C1QBP  
GNAS FSCN1  
HOXB1 PBX1  
OXTR GRK5  
HNRNPA1 TTF2  
ERBB2 JAK1  
EGFR EPB41  
HDAC5 NCOR2  
PARP1 TRIM28  
NSF STX12  
EHMT2 DNMT3B  
EIF3D USP3  
CPE TRH  
TTN DDX56  
DDX17 SREK1  
FXR2 LCMT1  
ESRRA DUT  
GNE KIAA1549  
SMNDC1 MAPKAPK2  
CTSO SERPINB13  
SPP1 PDLIM7  
FDFT1 FAM101A  
PCBD1 CALCOCO1  
SERPINE1 ELANE  
KAT5 PLEKHA4  
PITPNM1 PTK2B  
PRKCZ CASP8  
TAF1C TAF1B  
GRID2 GRIK2  
ENG TGFBR3  
EPB41L2 SPTAN1  
ARNT HEY2  
PHF17 KAT5  
TTC17 SMURF1  
KDM2BEZH2  
LGALS3BP TRADD  
RAB35 GNPAT  
NFKB2 LGALS3BP  
TGFBR2 ACVR1  
TRADD TNFRSF25

UBE2H TRIM36  
ACP1 EPHB1  
ENSA KCTD15  
SFN ARHGAP21  
TRAF7 TRAF6  
KCNQ3 CALM2  
TGFB1 STYXL1  
MDM2 BANP  
UBOX5 UBE2E1  
NCK1 ADAM15  
MAPK10 MAPK8IP2  
EIF1B EIF1AX  
SNRPD3 GEMIN6  
HTT OPTN  
LDLR APOE  
AR CCNE1  
FYN FLNA  
DBN1 MAP3K3  
SUMO1 MDM2  
KDM5C SMAD3  
TUBB PFDN4  
PRNP OPCML  
ZC3H12A TANK  
ACTL6A RELA  
NTRK1 RASGRF1  
OSBPL9 OSBPL11  
PSME3 DTNBP1  
OSBPL9 OSBPL10  
CHD4 MCRS1  
MYBL2 E2F1  
ATN1 SPAG5  
FLNA PCBP2  
PTPRT PTPRN  
HMGB1 SOX18  
GABRR1 MAPK1  
HDAC3 CSNK2A1  
CDH1 ITGAE  
SREBF2 GOLGB1  
SRF NCOR2  
UBE2E1 NEDD4L

GJB1 OCLN  
CTNNB1 SH3KBP1  
HSPG2 VWA1  
TNFRSF14 RPL36  
ESR1 NSD1  
PHB RNF2  
AR DDC  
ETS1 STAT5B  
ERBB3 VAV1  
RANBP2 MYH14  
POLR2G WDR48  
HSP90B1 MAPK6  
EEF1D FRA10AC1  
SORBS2 ABL2  
MAX CLIP2  
VHL ATM  
UBE2D3 TRIM2  
GABRR1 GABRR2  
ZNF512B TRAF4  
HDAC1 SMARCE1  
PLXNB1 GRB2  
RAB3D RAB3IP  
DVL1 CSNK1E  
PSMA7 PARK2  
CBFA2T3 ZNF652  
ENO1 TSG101  
HSD11B2 CTBP1  
POLR2C INSL6  
EIF1B EIF3A  
VIM TRIOBP  
FOS FIP1L1  
SLMAP RAPGEF2  
POU2F1BRCA1  
CTNNB1 MYO7A  
DSPP DES  
MAPK10 KIF26A  
CRTC2 SIK2  
WDR5 TRAF3  
SHBG FLNA  
RAF1 AR

YWHAG SF3B2  
TRAF3 TNFRSF11A  
ARL3 GOLGA4  
ATN1 CACNB1  
IKZF1 HDAC2  
CLINT1 MAP1LC3C  
RIPK2 CASP8  
SETD1A CXXC1  
PRKDC ATM  
SSNA1 SPATA2  
ZNF24 USP11  
ARL3 UNC119  
SMC1A SMC3  
MCC EEF1D  
CCT2 PAK2  
CDK5R1 CDK5RAP2  
CSN1S1 KLK6  
GRB2 MAP1A  
DSPP PRKACA  
WIZ CTBP2  
COL6A3 PDIA3  
A2M CPB2  
EWSR1 DYNLL2  
NUP153 SMAD3  
MID1 UBE2L3  
CRYAA CRYGC  
SLC38A1 RBM17  
SS18L1 STAT3  
GNAZ RAP1GAP  
DDN WWC1  
PRKAR2A SEMG2  
ARL4D EIF2B1  
CD28 CD247  
HERC2 PMS1  
RAB11FIP1 RAB11FIP2  
MYC TUBA1A  
GABARAP MAP1LC3C  
RNPS1 NKAP  
PRKAG1 FKBP4  
PSTPIP1 ACTB

HTT GPRASP2  
TGOLN2 AP1M2  
BUB1 AP2B1  
TAF13 TAF9  
BCAP31 SEC61B  
PCBD1 FAM135A  
TGFB1 ITGB8  
UBE2D3 TRIM5  
TUBG1 GSK3B  
MDM2 CCAR1  
PPIB TRAF1  
EP300 IRF7  
RHOT1 TRAK1  
YWHAG PPIG  
SPOP GDI1  
CXCL11 DPP8  
NR3C1 SLC25A4  
MCM6 MLLT3  
CDKN2A ZNF227  
RECQL5 PCNA  
RARG PNRC1  
CDC27 PIN1  
HDAC4 ANKRA2  
RUNX3 HDAC2  
SIVA1 TNFRSF4  
CHMP2A USP54  
PML TOP2B  
COIL FAM115A  
PLS3 HLA-B  
CSNK2A1 CDC37  
YWHAG HNRNPAB  
TYK2 ELP2  
TAF7 TAF2  
LYN ADAM15  
PEX19 SLC34A1  
MAPK1 DUSP9  
SLPI CTSS  
ARRB1 ITCH  
GIGYF2AKNA  
CDC27 CTNNB1

ILK NUP93  
EEF1D KPNA1  
STAT3 STAT5B  
KRT31 BAK1  
TNFAIP3 NDUFS1  
CLINT1 OSBPL10  
IGF1R GNAI1  
TGFB1 DCAF6  
DLG4 ZDHHC17  
ERBB3 NRG1  
SPOP DDIT3  
CCND2 DMTF1  
CLCN4 CDC42  
BAX MOAP1  
CMPK1 BACE1  
ATXN3 EP300  
PLCB2 ALK  
SF3B4 SRRM2  
PARP1 THRA  
FLT4 KDR  
TP53 HNRNPUL1  
STAT3 CCR5  
PGRMC1 ATG5  
RELB SMARCC2  
YWHAQ CRTC2  
TUBA1A RAB8B  
ODF1 TRIP6  
RASSF2STK3  
TGFB1 RASL12  
AMFR UBE2D1  
HEXIM1 ESR1  
SFN PI4KB  
CDC25A NAA10  
NR4A1 RPS6KA1  
ERBB3 FLYWCH1  
PSMD11 TLE1  
DYNLL1 MTA1  
CDK14 SEPT8  
LYN UNC119  
NSF STX8

CLSTN1 TOPBP1  
MYOG CSRP3  
TRAF2 SPATA2  
STK4 TAOK1  
PTPRC GHR  
RPA2 RB1CC1  
PTMS CREBBP  
YWHAB TPD52L1  
SOCS7 GRB2  
DSPP RANBP2  
ILK RICTOR  
RECQL5 TOP3A  
KPNA5 CDKN1B  
CD4 HLA-DQB2  
SOCS1 TIRAP  
VWF MAP3K3  
GNA14 SSTR2  
TGDS PIK3R1  
APBB1P PACSIN3  
FGF17 FGFR2  
FURIN SORCS1  
PTPRB SUMO1  
CCNT1 CDK9  
MLH1 FLNC  
CD19 PLCG2  
CYP27B1 BAZ1B  
EMD SMARCC1  
CCDC141 DISC1  
UBE2N TMEM189  
VHL EP300  
CDK12 SRRM2  
TCEB1 DIO2  
SKIL RPF1  
MAPK6 HECW1  
SPTAN1 EVL  
HGS TUBB2A  
PPP2R1B ZRANB1  
SRC AKT1  
CBL PTPRK  
JAK2 HTR2A

ACTL6A INO80  
APEX1 SET  
NCK1 CSMD2  
PARP1 PRMT1  
RPL28 LYAR  
PSMA3 POMP  
HSPA4L TAB1  
MAPK3 GAB1  
ELN BGN  
MEX3B RAP1GAP  
FLT1 PTK2  
CCNB1 FLNA  
EP300 GATA6  
UBE2N STAMBPL1  
INO80DINO80  
BRCA1 CCNA1  
XRCC1 LRIG3  
ATF2 MAPKAPK5  
GREM1 YWHAH  
GSK3B CKLF  
FGFR1 CDH1  
SNAP29C1ORF190  
NFKB1 BCL3  
ERC2 GIT1  
GRN HK3  
DAND5 MAPK14  
TGFB1 NKIRAS1  
RUNX3 SMURF1  
MTPN PRKAB1  
GRINL1A AHSP  
TRIP13 NIF3L1  
DPF2 SMARCE1  
TACC2 SMARCB1  
ROD1 FTSJ1  
NPLOC4 VCIPI1  
RAD17 PRKDC  
UBE2D1 BRE  
PTN RAPGEF2  
ADRBK1 GIT2  
ESR1 CTNNB1



SMARCD1 CDX2  
OMA1 APLP2  
KHDRBS3 SIAH1  
HOXC8 BMPR1A  
ARPC5 ACTR3B  
OXSR1 TGFBR1  
CRK CSMD2  
TSC22D1 EHD4  
PTPRF CAV1  
TNFRSF1B SLC1A5  
EPOR SHC1  
PDPK1 PRKCD  
BCL2 NR4A1  
BMPR1B PLEKHB1  
EPOR PTPN6  
CSNK1G2 MTA1  
MMP13 BCAN  
PHKB C20ORF27  
FUCA1 MARK2  
RPL22L1 G3BP2  
TUBA4A NCOA6  
SRSF7 CPSF6  
ZNF133 MDM2  
CSK PTPRO  
H3F3B MLL3  
CACNB4 TBL3  
PRPF4 N4BP2L2  
FLNB MAPK8  
LMO3 C19ORF50  
YWHAQ SPIRE1  
DNM2 RUVBL2  
RXRA PIK3R1  
KDM1AHDAC1  
RXRG LRSAM1  
ATAT1 SETMAR  
JAK2 PPP2R1B  
ROCK1 SMAD2  
APP APLP2  
STXBP1 PLD1  
USP6 USP32

PRC1 KIF23  
ESR1 PHB  
MYC SMAD2  
PPP2CA PPP2R2D  
ITGB2 GULP1  
AP1G1 AP1M1  
ZNF165 PDLIM7  
ATN1 MAGI1  
PLCG2 ZNF512B  
FLT1 KDR  
CETP EWSR1  
TNF CALM2  
MCC GNB1  
DFFA USP15  
CLINT1 STAMBPL1  
FKBP2 MAPK3  
CCNG1 MDM2  
AP2A1 NUMB  
KAT2A ENY2  
LAD1 COL17A1  
EPPK1 NFKB2  
ERCC3 MNAT1  
AHSG RRAS2  
MAPK10 HDAC9  
ERCC3 CCNH  
VHL USP33  
ITGB5 PALLD  
SYNJ1 SH3GLB1  
PRC1 CENPE  
FANCC IK  
HSPB6 HSPB8  
TP53 DUSP28  
USP14 PSMD4  
YWHAG MAP3K3  
STX2 CPLX2  
ALDOB BBS2  
TNFRSF10A BTK  
APOB RPS27A  
RHOG DOCK1  
CD19 PIK3R1

BCAR1 JUB  
CREBBP NPAS2  
TNFRSF1B C1QBP  
NFKBIA NCOR2  
SRSF2 U2AF1  
SGK1 FSCN1  
PIK3R1 LRIG3  
CD3D AP2M1  
UBE2D3 TOPORS  
MBD4 TRIM27  
ZNF512B IL1F5  
INSL3 RXFP2  
TUBG1 RACGAP1  
DNM2 EIF3L  
HSPA5 EIF2AK3  
HSPA5 PTEN  
CSNK2A1 MAPK14  
CTNNB1 AKAP12  
SLC11A2 NDFIP1  
TRIM27TRIM11  
S100A1 PGM1  
PRKAR2A AKAP4  
SNAP23PRKCA  
COPS2 IRF8  
CCT5 CTTNBP2  
DCTN1 DISC1  
ENO1 MYOC  
TAF5L MAX  
CDK8 EHMT2  
ANXA5 IFNGR2  
SMAD9 TBCD  
XPO1 CCND1  
SNRPD2 SRRM2  
ELF3 EHF  
PNP APLP1  
GPR37 DNAJA1  
PSMD11 ZHX1  
NKX2-1RELA  
VCP RNF19A  
MDM4 TP53

CUL4B COPS3  
UBOX5 UBE2D1  
APIG1 NECAP1  
PPP2R1A CTTNBP2  
SERPINA1 TCF3  
ITGAV AUP1  
TMSB4Y ACTA1  
HSPA4 HNRNPD  
PRKG1 GKAP1  
IKBKAP PLK2  
CDK1 HMGA1  
PRKACA BAD  
CAMK2D CYLD  
TP73 CREBBP  
PPP2R5D NEK1  
PLCG1 KDR  
BDNF NTRK2  
SRGN GZMB  
MTHFD1 MCC  
SRC MUC1  
SNRNP70 SFPQ  
FZD7 PTK2  
NCK1 TMPO  
ABL1 PRDX1  
RPS11 MAP3K1  
LRSAM1 TSG101  
ESR1 COPS5  
RPS27A PLK3  
RPL28 UBE2D1  
SERPINA1 ELANE  
YWHAB HECTD1  
MDFI DDX19A  
APBB1 TSHZ3  
PLA2G4A CAPI  
POLE2 POLE4  
BCL2 CASP3  
BCL2 CASP2  
TRIP6 C5ORF55  
MEF2D CABIN1  
APOA1 GPLD1

IKBKB HSPA1B  
HSPA9 RELB  
TACC2 HMG20B  
SMARCA4 UBE2O  
VHL RAB1B  
NCOA2 CARM1  
UBE2E1 DTX1  
NFKBIB NKIRAS2  
NFKBIB NKIRAS1  
MYC MAPK8  
C4ORF41 HDHD2  
PIK3R1 NUP85  
PRKCB GPRIN1  
POU2F1PRKACA  
CMPK1 ATG5  
RB1 CASP3  
RB1 CASP2  
RAD9A ITSN2  
NF2 RIT1  
MED26 MED16  
UBE2E1 DZIP3  
TCF3 ASCL3  
IL2RB SHC1  
OGT NUP62  
IL2RB PTPN6  
PRKCD EP300  
LCK AXL  
EGFR PTK2B  
DDX5 FBL  
RFC1 RAD50  
FASN EWSR1  
TUBB RASSF1  
SMAD9 HEY1  
SLC22A1 LASS2  
CSDE1 PRKAB1  
DZIP3 DDX42  
UBE2E2 RNF2  
CDC42 DOCK7  
PSMD11 PSMD4  
MYH1 EXT1

EPB41 CACYBP  
RANBP1 TRAF6  
PCK1 IKBKG  
SP100 CBX1  
GADD45G PPARD  
MYO1CIKBKG  
TUBB4 RIPK1  
NCOR1 NR1H4  
BNIP1 STX18  
MYC KLHL5  
BRCA1 DCLRE1C  
ADRB2 PPP3CA  
EIF2S2 CSNK2A1  
EIF1B FUS  
CCDC33 MDFI  
NCOR1 TXNRD2  
CNOT10 CNOT2  
MAP4K4 UQCRB  
SNRNP200 USP39  
TRAF3 TNFRSF18  
IKBKG NFKB2  
SVIL PPARG  
COPS2 COPS4  
HSP90AB1 RIPK1  
EIF4EBP1 RPTOR  
NCAM1 ST8SIA2  
NCAM1 ST8SIA4  
RAB10 SEPT9  
HSP90AB1 EIF4EBP1  
PRKDC CLN3  
MAPK9 MAPK8IP2  
ADAMTS4 MT2A  
PSMA3 IKBKG  
ATRX LUC7L2  
CSF1R INPP5D  
SMARCD1 FEZ1  
HIRA HIRIP3  
UBE2U RNF17  
GBAS LONP1  
ASAP1 PACSIN2

DLG2 NLGN1  
LBP RPS21  
BID BCL2L2  
TAF5L ATXN7L3  
TIMM23 GSTK1  
RUNX3 SMURF2  
CSNK2B NOLC1  
JUP DSC3  
CHEK1 HSP90AB1  
MLH1 VAMP8  
FOXO3 SIRT1  
SDC1 LACRT  
NPM1 EIF2AK2  
RUNX3 SP110  
SUPT5H ZNF496  
TNKS FANCD2  
SMAD4 RAB34  
STX5 HAP1  
BMP7 NOG  
XPC ATM  
PF4 IL8  
MED26 MED31  
NPM1 NCAPG  
MLH1 SLC25A23  
TCP1 CCT7  
SEMA3E PLXND1  
YWHAG RALGPS2  
CCL2 MCM2  
UBE2U RNF26  
NCK1 SHROOM2  
YWHAG LSR  
PFN2 ACTG1  
KITLG CMA1  
PARD3 ECT2  
DLGAP3 FYN  
IRAK2 IL1R1  
NCK1 BRCA1  
MAX ZMIZ1  
NTRK3 DOK5  
CCT2 RIPK3

DPPA4 DPPA2  
BCL2A1 BBC3  
NR3C1 RBM14  
NKAP THAP1  
PPP2R5C SGOL1  
MYH9 TTN  
CCT3 STRN3  
MYH9 YWHAZ  
MSTN SGTA  
HDAC1 HDAC2  
ESR1 IGF1R  
RPA2 UTP14A  
ELK3 ID2  
JAK2 IRS1  
MCM4 USP7  
CCDC158 NAGK  
LCK FAS  
RECQL5 CREB1  
BCL3 CREBBP  
CBX5 CHD4  
BRCA1 PRKDC  
SMC1A STAG1  
GTF2B MED21  
RXRA PPARD  
LYN NMT1  
ANP32A HIST2H2BE  
SNRPF SRRM2  
GABARAPL1 RASSF1  
HOXC9 NMI  
CANX EBI3  
PLCB3 SLC9A3R2  
USP36 DDX41  
KRT4 ATG4B  
VPS18 GGA1  
VPS18 GGA2  
ESR1 DAND5  
KIF2A CLSTN1  
CCL25 CCR9  
VIM YWHAE  
GABARAPL2 NBR1



CUL4A WDR82  
HDAC1 CREBBP  
CYP2C8 DNAJB1  
GABARAPL2 UBA5  
TP53 COPS4  
CD2 CD48  
IRS1 GRB14  
NONO RNF43  
CATSPER2 CACNA1I  
NUFIP1 RUVBL2  
TNK2 VTI1B  
PPARG RXRG  
RPS27ARNF41  
GATA3 REPIN1  
EGFR FKBP8  
NIPSNAP3A HAP1  
ARNT TAZ  
IFNGR1 STAT1  
LYN CD79B  
KIAA1731 EXOC1  
GFI1B MID2  
TFRC MCC  
TCP1 MAP3K3  
SOCS3 PTK2B  
CREBBP CDX2  
MAPK3 PPARA  
CSNK2A1 NAP1L4  
NF1 DNAJC7  
RNASE4 ATP6AP1  
SSR4 C20ORF24  
XRCC5 TOP2B  
FBP1 RNF183  
EEF1A1 SPHK1  
ARNT HIF1A  
TFAP2A UBE2I  
FYN MED28  
ETV6 FLI1  
CD9 HBEGF  
CBX7 HIST1H4I  
USP39 PRPF8

CARD6 CARD8  
SOCS3 LEPR  
PLK1 FBXO5  
PRSS1 TST  
FYN PRKCZ  
FN1 REG3A  
HDAC2 ING1  
ANP32A HIST3H3  
TBP NCOA1  
PTPRM GNB2L1  
IGF2 IGF1R  
PRPF40A LTBP3  
EED DNMT1  
PTP4A3 GCN1L1  
CAPZA2 TWF2  
ADAM15 MEF2D  
PSMB5 NFKB2  
PFKP WIPI2  
DDX3X DYNLL1  
TERF1 YWHAG  
CASP4 TMEM147  
UBC ADAM19  
ACTB INO80  
HSPB3 INSL6  
TCEAL1 TCEAL4  
PFKP TRAF6  
MDFI ETNK2  
LAD1 SFN  
ISG15 STK38  
CD2 LGALS1  
ADAMTS4 FN1  
A2M APOE  
PSAP CELSR1  
SPAG9 MAPK8  
KCNH4 ID3  
BCL2 BLID  
MCM7 ORC1  
MCM7 ORC2  
PDGFRB VAV3  
LSM12 DSTYK

APBA1 KIF17  
UBE2D3 RFW3  
SPAG9 MAP2K4  
VHL SET  
GYS1 MAPKAPK5  
SPECC1L GLIS2  
EED CUL4A  
SMAD2 ZFR  
GRB2 GAB1  
APEX1 CCNA1  
PSMD2 UBLCP1  
VHL SAP130  
LRP1 GULP1  
TNFRSF1B TRIP13  
LSM1 UPF2  
TRIM29 UBE2I  
FOS RRP12  
KIT CBL  
EGFR CISH  
RAP2B RAPGEF5  
TP53 SLC38A1  
PPP2R1A PPF1A1  
MLF2 MMS19  
TP53 TAF1  
LCK KHDRBS1  
EPB42 CNO  
BTF3 TRAF6  
SET HIST3H3  
PTGS2 RBX1  
ITGB1 FHL2  
HDAC4 TP53BP1  
NPY PPYR1  
HBXIP ZBTB16  
CCL11 CCR5  
FKBP1A RYR3  
KRT15 ARC  
NR3C1 NEDD4L  
CCL11 CCR3  
FASTKD2 TRAF6  
CHRNA4 UBQLN1

OMA1 PTPN11  
SUPT7LTAF10  
GRB2 POGZ  
PPP1R8 SETDB1  
GATA4 MED1  
IKBKB MAVS  
CEP70 ZNF426  
FOS ESF1  
GRB2 SNTA1  
CDCA5 SMC3  
MPP3 KBTBD4  
GABPA GABPB2  
DUT PPARD  
TYK2 UBE2F  
CSNK2A2 SLC18A2  
LGALS3 MYOC  
CD19 CD22  
CTNNB1 ARID4B  
INHBA FST  
MET CASP3  
C1QBP MAP3K3  
MAGEA11 CCDC14  
SUPT5H PACSIN1  
TRIM37TCEB3B  
CASP7 CASP6  
CAND1 DDA1  
MTMR3EXOSC7  
CASP7 CASP9  
PNLIP APC  
MAPK3 DUSP4  
YY1 FKBP1A  
ESR1 SETD7  
DAND5 CASP3  
NDUFA4L2 COMMD8  
BCL2 PPP3R1  
SLC1A1EWSR1  
DNMT1 NRIP1  
GPSM2 GLIS2  
CTSA NEU1  
ANXA7 APC

GRB2 ADAM15  
SLC38A1 HSPE1  
CHGB SAFB2  
GRB2 PDAP1  
SMC1A CHTF18  
YY1 PPIA  
CNTN2 CNTNAP2  
PPARD NR0B2  
CEBPD TRIM26  
MYLK2 NFKB2  
TNFRSF14 SLC25A10  
AIFM1 XIAP  
TP73 KAT2B  
ILK CNIH4  
MDM4 E2F1  
ITGB7 MAPK8IP1  
SLC9A3R1 P2RY2  
TNF NEFL  
GRB2 OS9  
CAPN1 NFKBIA  
PLSCR1 ANXA11  
ESR1 KAT5  
CREBBP MAP3K5  
PDZD3 SLC01C1  
UIMC1 G3BP2  
CDC45 CCL2  
MYC MED1  
SPI1 SSRP1  
CD36 ITGA6  
CDK1 CDKN1A  
GJA1 MAPK1  
GNAS RIC8B  
GABARAP ATG3  
LYN SKAP1  
FAM127A HBP1  
ARFIP2 DTNBP1  
UBE2D2 RNF166  
TRAF3IP2 TRAF1  
NUP153 NFX1  
CASP4 CASP8

CBX6 USP11  
LRRC8D EXOSC4  
EIF1B PSME3  
FLNA ARHGAP24  
MDFI EWSR1  
PTPN11 CD84  
VAV1 EMD  
FLT1 STAT1  
ERH C7ORF64  
PRPF40A UBQLN4  
KIAA1967 ACTR3B  
ATAT1 MDFIC  
RING1 ELAC2  
ILK CCDC59  
DSPP CASP4  
SUPT5H MAML3  
SPCS2 C17ORF42  
ATP5A1 TBK1  
NPM1 IKBKE  
HMGA2PIAS3  
USP46 ERP44  
NUFIP1 RUVBL1  
GPAA1 PIGS  
PLCD4 TRIM39  
CYTH3 CALCOCO1  
TGFB3 TGFBR2  
NEK1 CTNNAL1  
ID2 PAX5  
NDUFA1 GOLGB1  
DRD5 GNA12  
CSTF3 IKBKE  
CRKL PTPN11  
MSN MAPK8  
SAP18 SRRM1  
TUBA4A HSPH1  
ABL1 FLNA  
MAPK3 PAK2  
SDC1 CD9  
FGFR2 FGF8  
ABL1 PXN

FOXO1 PAK1  
HAND2 PPP2R5D  
CYCS IKBKE  
FCER1G SYK  
FYN DUSP15  
PSEN1 APH1A  
FGFR1 SRC  
TAPBP COPB1  
RPL28 SGOL1  
TUBB DISC1  
EIF2S1 EIF2AK3  
HERC2 STAT1  
FOXO4 MDM2  
HLA-B AHCY  
GRB2 SPTBN1  
ESR1 PHB2  
ESR1 TNFRSF14  
XPO5 TNFRSF10D  
ZNF440 MAP4K5  
HSPG2 COL13A1  
PPP1R12A MAP3K3  
CEBPG ATF5  
PRPSAP1 DDX19B  
PAK1 ZNF83  
NR1I3 PPARGC1A  
NR3C1 NCOA6  
ASAP2 CBLB  
EGFR TPI1  
RB1 CCND3  
IKZF1 SIN3A  
SH3KBP1 ABI2  
SRC DOCK3  
RB1 CCND2  
PLAT LAMA1  
PFDN4 STAP1  
C17ORF28 RCN3  
STRAP PRKAB1  
PCBP1 RUVBL2  
SEPT4 RB1  
CD2BP2 PRPSAP1

PRKCA CD163  
SIAH2 SYP  
TSPYL1HAP1  
RSRC1 LSM2  
PIK3R1 TEK  
UBE2I RC3H2  
SERPINH1 BRCA2  
UBE2D2 RNF114  
TUBB2C DLST  
GADD45G PIAS4  
CEBPB NOLC1  
PIK3CGGAB1  
CFLAR CASP10  
MYH9 RAC1  
TJP1 KIRREL  
SMAD1 EIF2AK4  
PRKACA ACLY  
PLCG2 KHDRBS1  
CREB1 CREBBP  
DOK2 PSMD10  
SNX3 ABL1  
RPS27ABAX  
CD5 CD79A  
SOD1 HSPA4  
HMGA1CREBBP  
PARK2 CASP1  
STX5 BET1L  
HSPA4 ENDOG  
CBL OSTF1  
IPO7 TRADD  
CSNK2A1 CREBBP  
HNRNPK GFI1B  
C5ORF55 TRAF2  
ARL3 BSND  
CCDC59 TRAF6  
ARRB1 DDX27  
YAP1 SMAD1  
MLLT3 MCM6  
HMGCR STARD13  
CEBPB RORA



KIF23 ECT2  
PTPRF CTNNB1  
SPTAN1 PTOV1  
ING5 MEAF6  
VAMP2 STX1B  
ABHD16A DNAJC1  
STK3 FREM1  
AKR1B1 CSMD1  
MMP3 BCAN  
PFDN4 SPATA2  
TPPP SNCA  
ATG12 RPS29  
PGGT1B GNG2  
HSPA4L TRAF6  
SMAD9 DKK1  
PPFIA3 PTPRD  
FNBP1L DAAM1  
GJA1 GJA5  
TWF2 VRK3  
NGFRAP1 CCDC85B  
PPP1CACUL1  
CSNK2A1 HDAC2  
SUPT5H SSBP3  
INSR ARF1P1  
RPS29 DDX56  
TRAF1 GF11B  
GABARAP GPHN  
TMEM11 BNIP3  
HSPB1 MAPKAPK3  
TBP TAF3  
CARD6 NOD1  
MAP3K7 COPS5  
EPM2A RPS27A  
RPL22 TMBIM4  
KIF5A TP53BP2  
TUBB MX1  
FYN NTRK2  
RAD17 POLE4  
CDKN1A CCDC85B  
XPA RPA1

SSRP1 NEK9  
GDF9 RAB27A  
PRKCZ PARD6B  
ITGB2 PTK2  
UBE2D2 TRAF6  
PRKCZ PARD6G  
MAP3K7 MAP4K1  
PSMD7 PSMD4  
RB1 CDC27  
INSR SRC  
PTN PSMB10  
PCBP1 RUVBL1  
EPB41 CENPJ  
ERBB3 LRIG1  
HMGB1 ATOH1  
BMP2 RABGGTA  
HDAC4 IKZF4  
UBE2D2 RNF115  
RB1 FRK  
MLH1 MSH6  
HIST2H2BE SIRT7  
TIA1 RC3H2  
PPP1CA TP53BP2  
TLR4 HSP90B1  
KRT15 USHBP1  
DFFA HERC1  
GTF2I SMAD2  
ACTL6A BAZ1B  
CRP GP6  
HNRNPA1 SRRM2  
MAPK9 NFATC2  
NGFR ZNF274  
HDAC3 THRA  
UBE2W RNF167  
KRT15 AMOTL2  
STAT3 GTF2I  
TOP1 CASP3  
DDX3X YWHAZ  
GDI1 YWHAZ  
LRP2 DLG3

SEMA7A GRB2  
UBE2A CMTM2  
RAF1 BCL2  
PLD2 RPTOR  
UBE2D2 TRIM17  
RASSF3MAP1LC3B  
FANCA NCK1  
ITGA1 COL13A1  
NAA38 UPF1  
DCN MMP7  
UBE2V2 SUV39H2  
ARPC2 U2AF1  
RPS6KA5 MAPT  
KIF20A RAB6B  
SNAI1 JUB  
TNNT1 PPFIA1  
PLD2 PIP5K1A  
PPP2R1B PPP2CA  
SMARCA4 NFE2L2  
EIF3E COPS8  
CDK18 CCDC85B  
UQCRC1 TRIM63  
SMARCD1 BCL7C  
GBAS GABARAPL1  
GTF2F1 MED21  
SNAPIN LRP12  
ATXN7L3 TRRAP  
DEC1 UBE2I  
TPT1 IKBKE  
TCOF1 USP44  
HIST1H4I INGX  
ADRB1 ARRB1  
COPA RAC1  
CCT5 TBK1  
TNFRSF10C LRSAM1  
BRCA1 UIMC1  
GPANK1 GRB2  
BTAF1 MYC  
HDAC1 DDX17  
HUS1B RAD9A

DSPP NFKB2  
ESR1 BDNF  
PIK3R1 PSEN1  
MSH4 MLH3  
RPS27A SOS1  
SFN SHCBP1  
PPFIA3 PTPRG  
VTN LACRT  
RRP9 RAP2A  
SH2D1A SLAMF6  
TUBG1 RNF19A  
ARIH2 PPP2R1A  
PAPSS1 UNC119  
SH2D1A ERBB3  
CANX ABCC2  
ELF3 KCTD5  
TNFRSF14 ATXN10  
EWSR1 BTK  
RPA3 RPA4  
RCC1 CHKA  
ATN1 EWSR1  
PGAP3 CSNK1E  
NCK1 DAB2  
MAF USF2  
HNRNPR NCK1  
TRIM24 CBX5  
SRC PTPN21  
SUMO1 CDCA8  
ERBB2 VAV1  
MED26 TRRAP  
BCL2L1 BCL2L10  
PLK1 ERCC6L  
CBX1 HIST3H3  
TRAF2 NUDT18  
NCOR1 SIN3A  
SRSF6 PPARGC1A  
RPS27A MCL1  
CREB1 HDAC2  
NCOR1 SPEN  
CBX5 LBR

DMRTB1 NCKIPSD  
LEP LEPR  
RB1 GNB2L1  
HCK CSF2RB  
CD33 PTPN11  
CUL4A WDR61  
PGAM5 OSBPL10  
SF3A2 SEC31B  
GABARAPL1 ATG3  
SRF EPC1  
ARSA Bmpr2  
PLG IGF2  
MYC IPO9  
UBE2C ANAPC11  
EEF1A1SDHAF2  
FOS APP  
DYNLL2 THAP10  
EEF1D CTBP2  
MOS Bmpr2  
EIF3M PRKAB1  
CCT3 HNRNPA0  
RXRB APCDD1  
PRKCA STXBP1  
MYOD1RXRA  
SRC DDR2  
EIF2S2 ZBTB16  
CBL EEF1A1  
TACR3 TAC4  
SIPA1L3 YWHAZ  
HDAC2 BAZ1B  
PRMT5 SNRPD1  
ZNF354A TRIM28  
CPNE3 QARS  
NR0B2 SMARCE1  
USP5 RNF11  
DEPDC1B FAM175A  
PSMB5 PSMB7  
U2AF2 RNPS1  
SUV39H1 DBC1  
EIF1B ACTR3

FANCA PSMA5  
GABARAPL2 CLINT1  
SUPT5H RPL8  
ZNF197 TRIM28  
DLGAP1 NCK1  
C8ORF33 GIT1  
SLC25A4 PRKCE  
PTPRA PTPRM  
EIF2AK2 MAP3K5  
TRAF1 RIPK1  
FLNA APC  
CEP152 EPB41L3  
NR3C1 SRC  
EGFR SH2B1  
PCMT1 MCC  
RPS27ARCHY1  
PLD2 FTSJ1  
HCK ARRB1  
PRMT5 SNRPD3  
HDAC2 MBD1  
PPID HAP1  
NRIP1 HDAC5  
CD28 PIK3CG  
C6ORF62 NDUFA4L2  
TOP1 NCL  
XRCC3 BRCA2  
FLII CARM1  
DAZAP2 NOC4L  
DIDO1 WWP1  
MTMR14 MAP1LC3B  
DCN COL4A4  
ERBB2 TENC1  
RFC2 USP20  
PCGF2 UBE2E2  
FANCA SMARCC1  
UBE2D1 BFAR  
STAG1 PDS5B  
SHC1 FCGR2B  
SOD1 SMAD2  
PPARG NRIP1

TAF1D RRN3  
EED HDAC1  
SP8 ZNF519  
DVL1 HDHD2  
VAV1 DNM2  
AP2B1 POM121  
TFAP2A NPM1  
TRAPPC2 TRAPPC3  
GNAI2 P2RY12  
CTNNB1 NR5A1  
ZNF490 ZBTB32  
TOM1L1 EGFR  
TOB1 HNRNPF  
EIF3F WDR48  
DPEP3 BCL6  
C1QC FKBP2  
KRT31 USP15  
CHD3 CHD6  
PGLYRP1 YWHAZ  
SCN4A DLG2  
SRC ABI1  
SLC25A21 AZI2  
CD5 PIK3R1  
CDH1 ACTR3  
CDC37 MAP3K14  
GNB2L1 GRIN2B  
FKBP1A RPTOR  
RAB4A RABAC1  
BID CASP10  
TRAF1 EDAR  
CTBP2 CTBP1  
MAGEA11 TCF25  
MED6 MED8  
MAP1A MAP1LC3A  
PRPF4 PFDN4  
TWF2 ERC1  
NFKB2 GLG1  
YWHAE WNK1  
HSPA4L PRKAB1  
UBE2U TRAP

SERPINF2 KLK2  
CDC7 CDKN1A  
C6ORF204 MARK2  
PRKACA RYR1  
SMAP2 WDR48  
NPBWR2 NPW  
MAF EP300  
MED14 MYC  
SUPT5H PPIA  
CDC20 YARS2  
SLC38A1 ABCB8  
MYC TAF5  
DST MEF2D  
ESR1 HDAC7  
SMAD1 PSMD1  
MEF2D SNX5  
CYP27B1 RNF14  
OMA1 CRK  
MAD2L2 FZR1  
SUPT3H TAF6L  
OMA1 CRKL  
ITPR1 MRVI1  
RAD17 POLE3  
FOXH1 DRAP1  
RASD2 RABAC1  
COL1A1 COL7A1  
YWHAQ SAMD4B  
CSDE1 TRAF6  
HIP1 MAX  
TNPO2 NXF1  
KRT18 GRB2  
SHBG ACTG2  
CREB3L3 USP7  
CHD3 IMMT  
GRB2 DCTN2  
PRKACA SYN2  
SERPINA1 CTSG  
PSMB1 TSC22D1  
EPB41 SPTBN1  
GOLGB1 VRK1



MCF2L CDC42  
RBMX TRA2B  
ESRRG PPARGC1B  
MTNR1A GNB4  
XPO1 FOXO4  
KLHDC2 EZH2  
RBMX MEPCE  
FOS APLP1  
HAND1 ACHE  
YY1 HIST1H4I  
HAP1 PPID  
PPARD NCOA2  
OMA1 LRP2  
ESR1 NR2F1  
ESR1 NR2F6  
MARK3 KSR1  
GOLGA3 TSNAX  
CASP4 SMC1A  
TGFB3 ACVRL1  
STAP1 RUVBL2  
ACTN1 GRIA4  
TP53 TOP2B  
CDC6 MCM8  
PSMD11 GAPDH  
ZNF24 COPS6  
IKZF1 CHD4  
OMA1 VLDLR  
IRS1 PIK3CA  
ZBTB7B DAND5  
BRD2 HIST1H4I  
PPP2R1A STRN3  
CHGB RXRG  
AR NRIP1  
UBA1 UBE2I  
SCAND1 ZNF397  
PCNA ELP3  
STAP1 RUVBL1  
ANXA2 YWHAZ  
ESR1 DDX17  
UBE2K UHRF2

ACTA1 MLPH  
UBR5 WDR48  
UIMC1 SPATA2  
MAPK3 DAPK1  
PSMB3 DSTYK  
CCND3 RUNX1  
A2M CTSE  
PDCD6IP TNFRSF10D  
PRKCA CYTH2  
UBE2E1 RNF130  
IRS1 MTOR  
CHEK2 MDM2  
CAPN1 FANCC  
CCT5 STRN3  
USP1 KPNA1  
H2AFX TP53BP1  
SHC1 MUC4  
HPCA MAP3K10  
HMGB1HOXB1  
HDX SUFU  
CDH2 CDH11  
HMGB1HOXB3  
LCP2 CLNK  
CCT2 STK24  
STK16 ICA1  
HNRNPU NFKBIB  
TERF1 UTP14A  
RBL1 MCM7  
CD58 DNAJA1  
ATIC NDUFAF1  
P4HB ERO1LB  
CDH2 CDH4  
RPS27A TP63  
RCN3 KLHDC5  
TGFB1 SDC2  
MRPS9 HAP1  
SSX5 NFE2  
GTF2F2 MED29  
HMGB1 CREBBP  
PRKACA RYR2

HNRNPH1 YWHAG  
BCL2 BID  
GADD45G RWDD2B  
CLIC3 MAPK15  
CDK4 ZNF655  
PRPF4 GPHN  
THOC5 THOC7  
MAP3K7 IKBKAP  
STRAP TRAF6  
DTNBP1 SYBU  
PTP4A3 GBF1  
PCNA CDKN1A  
RPP38 RPP30  
CALCR LRP1  
GABBR2 GRASP  
HNRNPH1 HNRNPK  
DTNB DTNBP1  
ESR1 KAT2A  
EGFR DYNC1H1  
COPS5 WNK1  
FYN ARHGAP32  
SREBF2SAFB2  
TCF3 PDX1  
KPNB1 NUP54  
PSMA7 PRKAB1  
GABARAP RASSF1  
SCAMP2 ARIH2  
SEPT2 DAZAP2  
SMG6 UPF1  
USP2 TRAF2  
HOXA5 DDIT3  
PRKRA TARBP2  
BCL2 BAK1  
IL1B IL1R2  
TRIAP1 TP53  
NOD1 MAGED1  
MC4R ASIP  
SUPT5H ZNF512B  
HSPD1 RASA1  
EIF2AK2 PPP1CC

RNF183 EWSR1  
FOS HNF1A  
ARRB1 CSNK2A1  
MED22 MED19  
SGK1 VARS  
STRN CTTNBP2NL  
RAN XPO5  
RAE1 WDR59  
UBE2H RNF38  
EIF1B ACTR2  
ARR3 GNMT  
LRSAM1 MGAT4B  
GNAI2 PTPRU  
KRT15 C1ORF65  
GP9 CRK  
C20ORF94 SLX4  
NR4A1 PREPL  
CKAP4 CLN3  
NR1D1 NR1D2  
HNRNPH1 SUMO2  
SMAD9 DNAJA3  
UBQLN4 ZDHHC3  
RAN SMURF2  
ACTN2 RAVER1  
KRT5 APC  
LTA TNFRSF14  
DHX9 ZMAT3  
NR3C1 DAXX  
SFN ARHGAP11A  
GRINL1A RBM4B  
TPM3 TMOD2  
AP1G1 SYNRG  
NOS1 CAV3  
SREBF1 ESR2  
ABL1 RAD51  
FYN PTK2  
HNF1A CDX2  
RAB35 C2ORF44  
RPA2 ORC2  
RPA2 ORC1

CD3E NCK1  
RNF167 UBE2D4  
KPNA4 NFKB1  
LZTR1 TFAP2B  
PRRC2A RBF1  
RAD51 ATM  
DTNB BEGAIN  
UCP3 YWHAZ  
PIK3R2 FYN  
RPS9 PRKAB1  
RBBP7 GATAD2A  
PLG KNG1  
REV1 POLQ  
MARK2 PARD6G  
GAPDH SLC2A1  
A1BG CRISP3  
RAN RANGRF  
FES HSPA4  
MED24 RPAP2  
APLP1 C7ORF64  
SUPT7L USP22  
RNPS1 SNX9  
CNOT3 CNOT2  
UBE2D2 FBXO7  
YWHAQ ADAM22  
GPRIN1 GRIN3A  
SRF ASCC2  
PPP2R1A PPP2CB  
CEBPB MEF2D  
YWHAQ RAI14  
CBFA2T2 GTF2E1  
HDAC1 NFIX  
APC CGNL1  
BCR PTPN1  
CDKN1B TSC2  
NXPH3 ABL1  
MCM5 MCM7  
CCR1 STAT3  
GRIA1 TANC1  
APOL3 PACSIN1

ABCA1 SHANK1  
YWHAQ DENND4A  
EPHA4 IKBKG  
POLR3A PCBD1  
NR3C1 TBP  
KRT15 PCM1  
CHEK2 CDC25A  
CHEK2 CDC25C  
POU2AF1 SIAH1  
PRPF40A CDK13  
RANBP10 MEGF10  
HDAC4 IKZF3  
GYS1 SIRT2  
LIMK1 CDC42BPA  
NCK2 NPHS1  
ERP29 UBQLN4  
GCDH RNF32  
S100A8 INSL6  
HOXC4 SOX10  
SKP1 FBXO44  
C4BPA PROS1  
NR4A1 MATR3  
CASP3 BIRC6  
MAPK9 HDAC1  
USP5 PRKAB1  
NGFR TRAF1  
PRDX6 HNF4G  
CACNB4 REM1  
GOLGA4 NDN  
SFN SPIRE1  
USP1 JUP  
APBB1 DIAPH1  
C7ORF64 MPHOSPH6  
MCL1 BMF  
FGB CALR  
GAS7 SF1  
BCL3 KAT5  
RNPS1 RBM8A  
MAP1B MAP1A  
RARA SKI

NCL NFKBIB  
BAI1 MAGI1  
RBBP6 UPF3B  
ZBTB9 ZFP64  
HOXD4 RNPS1  
CBX3 ATXN7L2  
TERT RPS27A  
SREBF1 CREBBP  
CRK SOS2  
GJB1 CALM2  
PLG SERPINC1  
CSF1R PIK3R1  
PRSS23 HSPA4  
PRDM13 KDM5B  
RPA2 UNC119  
EIF2AK2 TYK2  
CRK SOS1  
MAPK4 MAPKAPK5  
TGFB1 CUL5  
DLX5 DLX2  
JAG1 POFUT1  
SELP FUT4  
HDAC4 IKZF2  
SEPT2 SEPT11  
C1ORF65 PDLIM7  
P4HB UBQLN1  
MMP2 BCAN  
EZR ARHGDIB  
ACTA1 TES  
EZR ARHGDIA  
PDCD1 PDCD1LG2  
TRIM24 PML  
USP21 USP20  
MLH1 BRIP1  
XPC TDG  
SMAD9 TOB1  
ABLIM1 CALCOCO2  
GORASP2 RAD54B  
GRB2 PAK2  
CSNK2A2 SPIB

ZFP36 CCDC85B  
ACVR1B IGSF1  
NFKB1 ARHGEF4  
POU3F2SOX11  
CASP6 TRAF1  
ATXN1 VSNL1  
WDR5 CHD8  
MYC DHCR24  
PAEP EEF1A1  
PSMA3 TRAF6  
MYC SF3B3  
GRB2 CBLB  
MAGEA11 C20ORF72  
DLG2 NLGN3  
MYO9BMOBK3  
TP53 EEF2  
IKBKE GLOD4  
ITGB1 ITGA1  
UBE2H RNF4  
AIRE TRIM28  
EFS SH2D3C  
TCEA2 DNAJB9  
SFN TJP2  
AIFM1 RIPK3  
SOCS6 ACVR1  
PDCD6IP STK24  
HDAC4 HDAC9  
CCT2 PPP2R2C  
ESR1 SP2  
FEZ1 FEZ2  
RASA1 SPSB1  
CUL1 NLK  
STAU1 RAC1  
IGF1R STAT3  
DDX3X MAP3K14  
BRF2 XPO7  
NASP ARF6  
PIP USPL1  
ABCA1 LIMK1  
AP1G1 AP2S1



NRXN2 MACF1  
KEAP1 FAM46A  
RPL23 TAB2  
CUL1 RNF7  
SMAD7 KAT2B  
APAF1 CYCS  
KCNMA1 KCNMB1  
RHOG ELMOD2  
IL2RB GRB2  
CBX3 BAP1  
BCAR1 TRIP6  
UBE2L6 MAP3K1  
SMAD2 HECTD3  
MAPK6 COPS5  
MAP1A DISC1  
CRMP1 AGR2  
PREP PRKAB1  
TLE1 CELF3  
RFK DNAJB9  
RBX1 CUL7  
NR4A1 TMOD3  
CARS SUMO2  
TP53 TPT1  
THRA MED12  
TACR2 GPRASP1  
PDE6D RAP1A  
GBAS OSBPL10  
SMARCA4 TMF1  
PSMD7 NFKB2  
DVL1 VANGL2  
RAC3 CIB1  
TBL1X TAB2  
PCBP1 ACTR6  
DYNC1H1 DYNLT1  
CANX NDRG1  
HIBADH RPS27A  
ZNF195 PCBD1  
ABL1 POLD1  
APP LRP1B  
KRT31 DGKB

RMND5B EWSR1  
GTF2B NCOA4  
PRELP HSPG2  
YWHAQ SH3BP4  
RELA TUBA1A  
IL2RA STAT5B  
HEATR1 MAGED1  
PAFAH1B3 DDX24  
TRIM21 RPS27A  
XPOT HDLBP  
CFH PTX3  
ELANE SERPINF2  
CCT3 MAP3K1  
DYNC1H1 DYNLL1  
NGFR LINGO1  
CDK2 UBE2M  
XPC ATR  
MAP3K8 NFKB2  
ACBD6 IKBKG  
RAPGEF1 NEDD9  
SMAD3 NCOA6  
ZNF512B LZTS2  
ZNF512B SDF4  
C3ORF17 G3BP2  
GRIK2 LGALS12  
XPO1 EIF5A  
SART1 RAE1  
STXBP1 TUBB2A  
HGS GFAP  
EIF4A2 HNRNPUL2  
GUCY1A2 DLG3  
ZNF580 TSC22D4  
CCDC59 MOBKL3  
TUBA1A CYLD  
ABL1 CTNND2  
TIMP2 GANAB  
CDC6 AKAP8L  
PAFAH1B3 CCDC90B  
HDAC1 KAT5  
PAK2 NFYC

SUMO1 NFKB2  
CD4 CD28  
HDAC2 PADI4  
HSD17B11 GSTK1  
FIBP CSNK2B  
PEA15 PANK4  
GRB7 RND1  
SYK DUSP3  
PRKCA TRIM41  
ZNF136 MDFI  
HSPA9 TRAF2  
RB1 RBBP7  
BRF2 DDX20  
NEUROD1 RREB1  
PDE6D RHOB  
NCL NDRG1  
EGFR SPARCL1  
GNB5 GNGT1  
CAV1 DNMT1  
YWHAG ZC3H18  
DIAPH1RHOC  
NPR1 NPPB  
NR4A1 ATXN1  
CRK TNK2  
HOXD4 ASB8  
MYO10 SMAD3  
LYL1 TCF4  
GNB5 GNG3  
MAP3K10 SH3RF1  
RNF103 UBE2D4  
DFFA DFFB  
ESR1 HSP90AB1  
STC2 ARRB2  
TFG C14ORF1  
EFEMP2 IL16  
APBB1IP EVL  
YWHAE FAM110B  
CSDE1 GH1  
ARHGAP33 RAC1  
GBAS MAP1LC3C

SOCS1 ALK  
GABARAPL1 ATG10  
C2 MASP1  
HEXIM1 LARP7  
CHD1 HDAC1  
TBP TAF1C  
OLIG2 SRRM1  
TBP TAF1A  
LDLR SNX17  
RASSF2RASSF3  
PAM TSC2  
FANCA RPL18  
MBP APTX  
CCNT1 HNRNPA1  
PRDM2 HIST3H3  
CDX2 KDM5B  
GATA1 MED1  
RAD51 RAD54L  
POLR2E RUVBL2  
SOCS7 SORBS3  
FLNA RIPK3  
MAPK6 ARHGEF2  
NR4A1 TERF1  
CDK5 CDK5R1  
PPP2R1A PPP2R5C  
SMAD4 PAPP2  
BCL3 HDAC6  
EIF1B ACP1  
GRB2 MAP3K1  
DVL3 DIDO1  
CCT5 PDCL  
HRH2 GPRASP2  
UBA1 YWHAZ  
DISC1 STX18  
PFN2 EVL  
KRT34 DLG3  
TUBB4 SEL1L3  
GABRB3 RPS27A  
NOC4L TSC22D4  
MYST2 DDX11

NEK7 NEK6  
RB1 SNAPC1  
BCL2 MAPK14  
CSNK1E DVL3  
HMGCR ARHGAP1  
PPM1B CDK6  
PRPF19 EXOC7  
ARID4B SUDS3  
MSH2 OTUB1  
MARK3 USP21  
FLNA PRKACB  
MYC SKIV2L  
HOXA10 SIRT2  
NRP1 FLT1  
NPM1 NCL  
PIK3R1 INPP4A  
AGT MAS1  
DNAJC3 EIF2AK3  
MYC CDK1  
AR PSMC3IP  
KCNA4 INADL  
AGT PREP  
PIP SPI1  
STX12 PLDN  
STAU1 PABPC1  
SMURF1 RNF11  
SMARCA4 ING1  
LSM3 LSM10  
FAS MSN  
ELK3 GRB2  
TPT1 ATP1A2  
EP300 TCF7L2  
SMURF1 STRAP  
SMARCA5 MYO1A  
PPP2R1A MOBKL3  
SMARCA5 DNMT3B  
PRPF19 SRRM2  
COPS2 SIN3A  
P4HB PDIA3  
GRB2 NR5A1

MCL1 BBC3  
SNTB2 PTPRN  
CXCL10 VCAN  
AXIN1 SH3GL1  
CENPA CENPH  
UBE2E1 CADPS2  
RHOA ARHGEF5  
BCAR3 GSPT1  
LPXN PHF21A  
TFF1 HNRNPA1  
MYBL1 NCL  
EEA1 RAB22A  
ACTN1 MYOZ1  
NFE2L2PMF1  
COL9A1 MAG  
MPZL1 SRC  
TBP TAF7  
TBP TAF11  
TBP TAF13  
TBP TAF5  
RB1 MAPK14  
SMG7 SMG5  
HNRNPUL1 PRKAB1  
SLC38A1 DGKZ  
KCNH4 ID2  
FEZ1 TAC3  
IRAK1 TRAF4  
MAP2K4 MAPK8IP3  
UIMC1 BAG5  
ACTA1 NRAP  
PARP1 EP300  
LRPAP1 RANBP2  
UBE2N TOPORS  
CDC27 CDC16  
NSF PTPRJ  
CCDC85B USP2  
RAB27B CAV1  
FOS PNN  
FOS TSC22D3  
SLC9A3R2 SLC22A9

TP73 AKAP1  
RNF20 C20ORF94  
HGS MIF4GD  
CETN3 UNC119  
DLG1 BTRC  
PCM1 KIAA0368  
HPCAL1 IKBKG  
PABPC1 PINX1  
ARRB1 CMBL  
TRAF1 BIRC2  
MYC CDK5RAP2  
ETV6 GAB2  
ORC3 PTPRJ  
CSNK2A1 HSPH1  
CACNB4 PTN  
KLF8 FHL3  
GSPT1 CDKN2A  
SMAD3 ESR2  
MED24 AR  
TRAF1 BIRC3  
NCK1 RAPGEF1  
VHL PRKCZ  
NFASC ABL1  
PFKP GSTK1  
PICK1 F11R  
SDC3 FYN  
RPS16 PINX1  
USP7 SH3GLB1  
TCEA1 GTF2H1  
CCT4 WDR16  
ADRB3 GNAS  
BCL2L1 BCL2A1  
ARHGDIA RHOA  
MYB TRIM28  
E2F3 RB1  
HMGB1 NEUROD6  
SIX1 CCDC85B  
NTN1 NEO1  
SPOP DPPA2  
NPM1 EPHA1

HOXD4 ZMYND11  
EMD SH3GL2  
EMD SH3GL3  
PDGFRB EIF2AK2  
GSTO1 KAT5  
AKAP3 GNA13  
OGT APC  
UBE2D3 POLM  
SPRY1 CBL  
UBE2I C5ORF25  
POLR1B POLR1E  
CDK9 HNRNPK  
DYSF ANXA1  
NEDD8 SENP8  
TLE1 ZFP64  
MAPK1 RPS27A  
CALCOCO2 DAZAP2  
BAP1 AHCYL2  
MAP3K9 SH3RF1  
EIF3F HTR2A  
NRAS SMAD4  
MAP3K7 TAB2  
GABPB2 RYBP  
RPS6 RPS6KB2  
SMAD9 OTUB1  
GNA13 RIC8A  
MAPK1 GRB2  
LCK CDC25C  
MAX GGT7  
RAB3B CALM2  
RBMX CNBP  
AKAP13 ESR2  
TLE1 SIX2  
VIM TRADD  
MAP3K7 CNTN2  
YWHAQ EML3  
GFI1B ZNRF3  
SMAD3 CREBBP  
F12 MMP14  
ATP5J2 LPP



IL1R1 TOLLIP  
BCL3 COPS5  
SLC38A1 NET1  
S100A1 S100A4  
GLUL HIPK1  
JUND SMAD4  
NFKBIA MAP3K2  
IL2RG WWP1  
FURIN FLNA  
HDAC1 DAXX  
CDH5 PARD6G  
TNNT1 TNNC1  
SOD2 TMEM131  
HDLBP SMAD4  
TAF6 TAF2  
HERC3 UBQLN2  
YWHAG TIAM1  
EIF3D EIF3L  
HMGA1PRMT6  
CIT RHOA  
CIT RND3  
PDCD6IP CD2AP  
CSNK2A2 MAF1  
HMGB1IRF2  
HIST1H1A AEBP2  
ATXN7 CCDC101  
VPS24 TNPO3  
DISC1 KIAA1377  
MAP2K6 MAP3K5  
RXRA SMARCD3  
SLC2A4UBE2N  
ORC5 MCM4  
PPP2R1A RAP1A  
PRKCA RHOA  
STX11 SNAP25  
MYCN YAF2  
ZNF24 PTMS  
GABARAPL2 TMEM160  
IGF1R VAV3  
NPM1 GRB7

MAPK10      MAPK8IP3  
CUL5   ASB3  
MDFI   ILF3  
CUL5   ASB1  
CUL5   ASB4  
ORC5   MCM7  
YAP1   SLC9A3R2  
PTK2   MICAL1  
TNFRSF10A   RIPK1  
FZD9   WNT1  
SREBF1RPS27A  
POU1F1PITX1  
TP53   CAPN1  
FCHO1   SMURF1  
WEE1   BTRC  
FLNA   IKBKG  
LIG4   ATR  
LNX1   ENOX1  
SERPINB9      C7ORF64  
ADRBK2      CCR5  
PIM1   EPHA3  
FHL2   PHB2  
CSE1L   MAPK6  
PRSS23   SHMT1  
XRCC5   H2AFX  
PTK2   RB1CC1  
CES2   BMPR2  
RPA2   ATR  
SOCS1   EGFR  
RAB38   SMAD4  
GDF9   PABPC4  
LTF   CDK5RAP3  
VPS18   HOOK1  
RBFOX2      POLR3D  
GRIN2B      SYNGAP1  
HGS   TOM1  
ADRBK2      CCR4  
CAPS   LUC7L2  
DVL1   CXXC4  
PABPN1      CARM1

SNCA MAP1B  
DLGAP1 ABL1  
TXN MAP3K5  
GRB2 ABI3BP  
ACHE PRIMA1  
DLG1 DLGAP4  
TP53 NFKBIA  
DTX3L UBE2W  
HNRNPK GRAP2  
GUCY1A2 DLG1  
SPP1 ABCF3  
JAK2 STAT5A  
TBRG4 MTMR4  
ORC2 MCM8  
JAK2 STAT1  
CDK1 FOXO1  
YWHAG PPFIBP1  
SLC3A2PHLDA3  
EGFR SH2D2A  
IKBKB HSP90AB1  
HNRNPK CNNM3  
DNM1L FIS1  
CHD3 UBA3  
PLG NGF  
DLGAP3 DLG4  
PRKDC CHD1L  
GRN TRIB3  
SKAP2 HCK  
MCM5 SSRP1  
NUFIP1 TAF9  
SIPA1L1 CEBPE  
CDKN2A HUWE1  
SSFA2 YWHAE  
PPP1R16A FSD1  
FN1 COL4A3  
HDAC1 CHD4  
MAP1B RAE1  
HDAC2 APPL1  
HAP1 DEFB1  
YAP1 TEAD4

CST3 CTSB  
BCR YWHAQ  
YAP1 TEAD2  
RTCD1 LMNB1  
POM121 COL4A3BP  
HBXIP KIAA1377  
BRCA1 WNT2B  
SMAD3 NEDD9  
SMARCB1 CDYL  
LAPTM5 GGA3  
FBL TUBA3C  
PIK3R1 TYRO3  
CANX EDEM1  
CANX PIGK  
S100B S100A6  
SMAD9 SMAD2  
EIF2S1 LYAR  
CDH3 CTNNA1  
CDH3 CTNNB1  
POLR1E DDX20  
MAP1B NXF1  
HLA-E CALR  
GNA15 TTC1  
ELANE LPA  
USP39 RPL22L1  
NRP2 SEMA4F  
SF3A2 USP45  
KPNB1 MEPCE  
BCL2L1 BCL2L12  
GOSR2 NAPA  
ACTN1 CSRP3  
PRKACA GRIA4  
NEFL MYO5A  
GALNT5 EXT2  
NFKB2 DDX21  
HIST1H2AL SUPT16H  
PPP6R2 PLK1  
RBBP7 BRMS1  
TRPT1 TRAF2  
ICAM1 ITGAM

MAF1 ARMCX3  
U2AF2 SRSF1  
RB1 CDKN1A  
KRT1 CALB2  
APOA2 APOA1BP  
ITGAV ANGPTL3  
CIAO1 PSMB1  
CREB1 KAT5  
PRKD1 KIDINS220  
HDAC2 RCOR1  
RBMX CCDC33  
KNG1 MEP1A  
XIAP CASP8  
ICAM1 CHRM1  
KBTBD7 MAP1LC3B  
NUP214NUP88  
KRTAP4-12 SLC25A10  
ARPC2 CTTN  
LMNB1 YWHAZ  
CTNNB1 GRIK2  
SOCS1 IRS1  
FMNL1 XRCC6  
LYL1 TCF3  
SMARCA4 BAZ1B  
ACAA1 MAPK14  
KDM5B VGLL3  
PLXNB1 MST1R  
DNMT1 MKNK2  
AR GTF2H1  
MAP3K7 RPS3  
HNRNPR H2AFX  
MLL CTR9  
PPAP2CMLH1  
WBP2 WWP1  
RHOA AKAP13  
USP11 WBP5  
YWHAQ YAP1  
TRIM28ZNF350  
SOCS3 JAK3  
CDK8 MED30

CAST HTRA1  
ATF7 OCIAD1  
TBP HAP1  
GTF2F1 SRRM1  
GADD45B PPARD  
PFKM SUMO2  
POLE3 CHRAC1  
SRF HMGA1  
HDAC2 HDAC7  
VCP SUMO4  
MET PTPRG  
TOM1L1 C3ORF63  
TGOLN2 AP3M1  
ECHS1 TRIM63  
RHOH ARHGDIG  
BMP2 TGFB2  
RIPK1 TUBA3C  
DPPA4 SH3GL1  
STAM2 L3MBTL2  
DPPA4 SH3GL3  
SMAD4 EWSR1  
KPNA3 USP42  
XAB2 PPIE  
KCTD12 TRAF6  
APEX2 EFEMP2  
BCL6 BCOR  
GTF2B CKLF  
AIMP1 FTSJ1  
USP2 UBC  
EP300 MAML1  
PTPN11 GAB3  
MX1 TRPC7  
GEMIN4 ILK  
MKRN3 TSG101  
PAPOLA CPSF3  
KEAP1 PGAM5  
ACTA1 USP25  
HAP1 INSL6  
MYC RB1  
MYCBPAP MYCBP

DAND5 ATF7IP  
TOMM20 HAP1  
XPO1 YWHAZ  
ABL1 CCKBR  
UBE2U TRIM54  
OTUD7B PARK7  
MYST2 HOOK2  
CEP70 UTP14A  
NGFR TRAF3  
MET PTPRB  
PDCD6IP PHLDA3  
GATA3 HDAC4  
UMPS DLST  
SKP2 SPDYA  
POLR1B BAZ1B  
REV1 POLDIP2  
IPO5 RAN  
MAP2 GPRIN1  
PLK1 OSBPL6  
MSN ELF3  
DSG1 RUVBL1  
PDGFRB GRB2  
SUMO1 HSF1  
UBC INGX  
NEK6 RUVBL2  
AFTPH GGA2  
GATA4 KLF13  
AFTPH GGA1  
IPO5 RPL23  
PRPF6 MDM2  
CYP27B1 RXRB  
TAGLN2 PINX1  
PDGFRB RPS27A  
MYB SKP2  
TERF1 FANCD2  
SMURF1 TRAF6  
RAP1GAP YWHAZ  
YWHAG CDR2L  
TNNT1 TRIM63  
SUCLG1 SUCLG2

DIDO1 WWP1  
APP APBA1  
SLC9A3R2 SIAH1  
DLG1 SLC25A16  
IL12B IL23A  
UBTF CDK2  
DNM2 SNX9  
HIST1H1E MAP3K14  
SYK MS4A2  
EIF3E EPAS1  
CEBPB MAPK3  
EIF1B SOAT1  
BECN1 AFG3L2  
GABARAPL1 ATG5  
PPARD NCOR2  
FASTKD2 PHLDA3  
ERN1 PSEN1  
INADL PARD3  
UBE2M RNF167  
HDAC2 IKZF2  
CDKN2B ZBTB17  
BCL2 DYNLL1  
MED6 MED30  
GRB2 MTA1  
PARP1 BCL2  
TNIP1 NFKB2  
CCT5 MAP3K1  
PDE4DIP UBE2J2  
SMAD2 RNPC3  
TRAPPC3 C5ORF44  
SREBF1ID3  
XRCC6 SERPINB9  
NPM1 LYAR  
DYNLL1 TUBA3C  
HDAC2 IKZF3  
A2M AMBP  
BUB1 ARIH2  
PSMB1 HLA-B  
TPR GTF2E2  
TEAD4 VGLL1



ITGB3BP ABCF1  
SMAD2 RNF111  
SNRPB2 SNRNP40  
TBP TRIP4  
UBE2D1 TRAF7  
TBP NFKBIB  
MLL2 ASH2L  
LMNA EMD  
HSP90AB1 MAP3K1  
ELANE GRN  
PREP TRAF6  
ERC2 PCLO  
TRAF2 UBQLN2  
RBMX SORBS3  
RHOA NGEF  
SLC24A1 FYN  
AHSA1 GCH1  
GABARAP PGS1  
CD47 SIRPG  
XPO1 EZH2  
CAPNS1 LRRCC1  
UBE2Q1 IRF2BPL  
AP1G1 RAB5A  
HNRNPA1 FEN1  
LMNB2 PLCB1  
RIPK2 HSP90AA1  
SOX10 SUMO2  
HOXB6 EP300  
HAND1 PRKCA  
CDC45 POLA1  
PTGDS HK3  
MAP3K10 ZMYM2  
UBE2N PINX1  
EPPK1 ARF6  
SMARCC1 INGX  
SHC3 ALK  
PTGDS HK2  
AIFM1 TSC22D4  
PRKACA NDRG1  
TNF FAS

PCBD1 RPS24  
INSR PTPN6  
PDGFRA CBL  
TRAF2 AFF4  
INSR SHC1  
PTPN1 TYK2  
TRAF2 TBK1  
ALB UIMC1  
NSF STX4  
ARIH2 SLC1A6  
RPS6 MAP3K14  
MYC POLE  
UBE2U RBCK1  
RAF1 PRKCZ  
OPA1 WNK1  
SRC NKX2-1  
FOXP1 FOXP2  
CASP3 PLA2G4A  
USP9X ITCH  
MEF2C SAMM50  
NFKBIA NFKBIB  
USP7 RUVBL2  
EGFR GRB7  
DLG1 ERBB4  
ERBB3 ODF2L  
USP4 PRPF31  
MLLT3 APPBP2  
SRC GNS  
TRAF2 IPO11  
PSMA7 POMP  
UBE2I CHMP1A  
ZBED1 GPN1  
GATA1 STAT3  
ZFP64 ZNF70  
VIM PIAS4  
HSPA1B SNCA  
SRC CELSR2  
FOXO1 STK4  
NFKBIA BTRC  
TCHP NME7

UBC WWP1  
YWHAQ UCP3  
ACTA1 SORBS1  
CCNG1 CDK5  
DDX5 MAP3K14  
EGFR GRB14  
SFN PPFIBP2  
HIST1H1C SUZ12  
NR2C2 CDC37  
USPL1 KIAA0947  
SMAD1 RAB2B  
ZNF273 SP8  
TBL3 USP36  
MMP3 CCL8  
POLR1E SUN2  
KDEL1 BZW1  
ACVR1 VEPH1  
VIM KRT20  
MRE11A MSH6  
GRB2 RBBP6  
SGOL1 INCENP  
NFKB1 NFKBIZ  
NFKBIB TIMM50  
GFAP POM121  
DAND5 CTBP1  
UBE2D2 RNF11  
UBE2Q1 RNF7  
PLSCR1 SF1  
TAF1 EWSR1  
NRAS GRB10  
MTA1 HDAC2  
ZNF440 KRTAP4-12  
LAPTM5 HUWE1  
YWHAQ KIAA1409  
HNRNPU SF3A2  
PTPN1 TRPV6  
FSHR ARR3  
PSMD6 ARMC6  
ITGA5 ARHGAP5  
CLDN1 TJP1

ARHGDI1 CASP10  
DLGAP1 APC  
HDAC2 PHB2  
GNGT1 PLEKHB1  
TNFRSF1B HSPA1L  
EPS8 USP6NL  
MAPK14 KIAA1949  
MAP3K7 FOS  
COL4A1 APP  
ZNF83 SMAD3  
SNW1 PPIL1  
BIRC2 RIPK1  
RELB NFKB2  
HNRNPD SREK1  
GRB2 GRB10  
MRE11A EP300  
SMAD4 USP9X  
PDGFRB PTPRJ  
EWSR1 RAB37  
YWHAG ZC3HC1  
PMF1 COPS7B  
RPS14 PINX1  
PRPSAP1 TNIK  
PSMD11 TP53  
CDKN1A RAB1A  
GBP2 TFG  
ABL1 DNM3  
PFKP PRKAB1  
PIAS1 STAB2  
DVL2 BAHD1  
HMGA1EWSR1  
SSRP1 ROBO2  
ORC1 CDT1  
RPS9 TRAF6  
HIST1H3J CALCOCO1  
ITGB2 PRKCD  
PAK7 HIGD1A  
SLC9A3R1 OPRK1  
UBE2U PCGF6  
TP53 FAM173A

NOC4L GSTK1  
EFTUD2 SNRNP40  
MAPK8IP2 FGF13  
HNF4A NRIP1  
MMP3 CCL7  
GATA1 CEBPE  
PLSCR1GPRIN2  
CIITA KAT2B  
GRB2 CGNL1  
RANGAP1 RAN  
TMPO CLN3  
GPS2 HDAC1  
DHH PTCH1  
YWHAH MARK4  
PRNP CIRBP  
HRAS GPSM2  
GHR PTPN11  
CAPNS1 CAPN2  
BIN1 SYNJ1  
SLC25A5 RIPK1  
ATP2B4RASSF1  
TAF4 GTF2A1  
PINX1 SSR3  
RHO ADRBK1  
APP COL25A1  
UBA1 TSSC4  
XPO1 DHX9  
MGEA5MDM2  
TNK2 MERTK  
SMAD3 PAX8  
NRAS RAP1GDS1  
SRCAP CREBBP  
NCK1 ABL2  
KIF23 FYCO1  
TAF1D PPAN  
H2AFX SMARCA2  
PIK3R1 TRAT1  
H2AFX SMARCA4  
TAF4 GTF2A2  
RXRA PPARA

WNT5A ROR2  
WNT5A ROR1  
CDC25A MAPKAPK2  
ZFYVE9 SVEP1  
MAGEC1 ROCK2  
NACA ZHX1  
TERF1 TINF2  
CTNNB1 SKP1  
CTPS PINX1  
COPS6 SMPD3  
ERBB2 TOB1  
MDF1 C18ORF45  
CDC25B KAT2B  
MED13L MED29  
CBX4 MED9  
MED12 PPARGC1A  
PSMD1 PAAF1  
TOMM40 TOMM22  
SETDB1 BRIX1  
UBE2D2 ZNRF1  
GOLGA4 MACF1  
SMAD1 ZCCHC12  
FGF4 FGFR4  
SELP SNX17  
CASP3 BCAR1  
PTPN11 CSF3R  
HOXC9 ZNF384  
TP53 WT1  
XRCC6 PRKDC  
EGFR DNAJC4  
PBRM1 SMARCC1  
CENPA CBX8  
IDH3A DMWD  
SMAD3 RASD2  
ZFYVE9 FHL2  
TFAP2A RB1  
AXIN1 CSNK1A1  
H2AFX BRCA2  
OTUD6B RPF2  
ACTN1 CLIC5

FANCE FANCF  
RAF1 PRKCD  
PSMD10 PSMC5  
DNMT3L DNMT3A  
PPARG NFE2L2  
PSMF1 SMCR7  
ATXN1 WDFY3  
NPAS2 PLEKHA5  
UBE2D3 MUL1  
MORF4L2 SIN3A  
RBFOX2 NR2E3  
MAP2 MDM2  
ITGB1 ITGA6  
GRB2 INSL6  
VIM UPP1  
POP7 ATG12  
HERC3 UBQLN1  
ZNF143 CHD8  
MAPK1 GAB2  
SSSCA1HNRNPL  
SFN FAM117B  
AIRE SSRP1  
ZBTB3 PHF15  
TP53 EIF2AK2  
ANXA2 TRAF6  
SLPI KLK3  
BCR GRAP  
REV3L REV1  
ERO1LB ERP44  
COPE COPG2  
AR CCND1  
THRB SMAP2  
RGS2 WDR74  
SMAD9 RRBP1  
ETS1 RUNX2  
GMPS TCEAL1  
WAS FNBP1  
ARPC2 ZCRB1  
PGRMC1 TIMP2  
PAFAH1B1 DCTN2

ATXN1 TOLLIP  
RAB27A UNC13D  
MMP14 KISS1  
PPAP2CUNC119  
APC2 AXIN2  
YWHAG PRKCQ  
NOS1 SNTA1  
UBE2L3 RNF216  
INSR PRKCA  
EIF2B5 EIF2B1  
TP73 UBE2I  
DLGAP1 GRB2  
CFLAR CASP8  
USP5 RPS27A  
WASL WIPF2  
ULK2 GABARAPL1  
GH1 PTGES3  
MTOR PREX2  
FGFR4 STAT1  
DUT SPATA2  
KDM1AGDF9  
CASP3 GOLGA3  
MID1 UBE2E2  
MYF6 CSRP3  
VWF ADAMTS13  
SDCBP ULK1  
HIST1H4I DTX3L  
HNRNPF SRRM2  
HSPA1B WDR16  
TRAF3 NFKB2  
PIN1 DDX17  
SUMO1 RAD54L2  
HDAC1 BCOR  
CRMP1 FTH1  
CCDC130 ZNF24  
SNRPA SF3A2  
ITGB1 LGALS1  
EFNA1 SUMO2  
STAT1 IL27RA  
CAD RELB



DTX3 UBE2D4  
RQCD1 CNOT2  
PPIB PINX1  
DGKZ GRINL1A  
ZNF580 RAD54B  
ANXA6 CDC73  
NFE2 MAFF  
NFKB1 LYZ  
GNAO1 ADRA2C  
CAPN3 FLNC  
SLC25A6 MAX  
MYBL2 RPS27A  
PRKCZ PDLIM7  
APP CASP8  
EIF3F SRRM2  
USP11 MPHOSPH9  
YWHAH NEDD4L  
PSIP1 FBXW7  
TLE1 SIRT1  
DOK2 TEK  
SORBS3 MAPK3  
MERTKBMPR2  
LYN FOLR1  
NTRK1 PTPN12  
CARS PACSIN1  
TCF7L2 NLK  
CECR2 UXT  
NDUFB6 SNCA  
WIZ EHMT1  
CIC CENPJ  
FASLG SH3RF2  
HOOK2 APEX2  
PPP2R5E RACGAP1  
ATAT1 SMARCA2  
YWHAG TBC1D1  
F3 FLNA  
KIAA0776 CDK5RAP3  
DNAJB1 IKBKE  
CHGB POLD1  
OPRD1 KLHL3

PLSCR1 VASP  
GBP2 LSM2  
GTF2E2 GTF2H1  
MAPK1 ERF  
WASL FYN  
SEC24CMIA3  
SERPINB2 RBL2  
TUBB ARL8B  
RBM25 SRRM1  
SHMT2 GNAS  
PARK2 HSPA1B  
ESR1 NCOA4  
PCBP1 TRAF6  
SUMO1 FAM179B  
DCAF5 DDA1  
CIITA HDAC2  
BTF3 ARF6  
SUMO1 KIAA0284  
ITGB5 FLNA  
BRCA2 RAD23A  
UQCRQERCC8  
GADD45GIP1 EXOSC4  
ALDOASUMO4  
SLC3A2SLC7A10  
S1PR2 GNAI1  
KIAA0415 MDFI  
UBE2H MARCH10  
FAHD1 EXOSC4  
PLA2G16 UBQLN4  
PIK3R1 VPS13A  
MCC UBXN1  
MYH10 IKBKE  
RADIL SFI1  
EFEMP2 AQP1  
PRKCA TEP1  
ZNF91 NDEL1  
HSP90AA1 ZAP70  
CA12 CUX1  
MAPK1 METAP2  
CTNNB1 KAT2B

NFKBIE CALM2  
CTNNB1 KAT2A  
MCC RASAL2  
GAP43 PLCD1  
WASL LCK  
CTTNBP2 PDCD10  
IFI6 CIB1  
EIF3J MAGED1  
TAF1 ASF1A  
AFF4 TRAF2  
CACNA1B APBA1  
DGKZ GRINL1A  
FYN TRAT1  
SLC25A37 TCF12  
TSPAN3 EWSR1  
UBC MDM2  
EGFR PTPRB  
YWHAH NEK1  
MED26 MED11  
CASK RAB3A  
ADAR HDLBP  
FBL TUBB1  
SETD1A RBBP5  
CTNNB1 PTPRU  
ZEB1 CTBP1  
SYT1 STON2  
ANGPTL1 TEK  
SQSTM1 INA  
DLL1 POFUT1  
KIF11 RPAP1  
POLR2I MED10  
NPR1 PRKG1  
CTBP1 KAT2A  
ATG9A SRCAP  
CCBP2 CCL11  
EML1 ISG20L2  
CCT8 STK24  
FLNA RHOA  
LIG1 CDK2  
SFN PDZD11

SRSF5 DYRK1A  
SMNDC1 GNL3  
MAPK14 ZFYVE20  
IGFBP3 RXRA  
HNRNPK UBE2I  
MYST2 ING4  
RAF1 TSC22D3  
RUNX1 HDAC1  
RECQL5 CUX1  
LAMB2 PLEKHA5  
LSM3 XPC  
SMARCC1 WWOX  
RAC1 ARHGAP32  
INSR DOK5  
LYN CBL  
TAF10 TADA1  
CS USP11  
SUMO1 PML  
MLH1 PSD3  
GDF9 BMPR2  
DDB1 DDB2  
RAC1 CDC42SE2  
DVL2 AXIN1  
STAMBP SMAD2  
VIM SUMO3  
CD8A LGALS1  
RAC1 CDC42SE1  
CTBP1 KAT2B  
LNK1 KCTD13  
RHOA SPRED2  
MAPK10 CDK5  
SERPINH1 ESR2  
HIST1H4I ERCC6  
LYN CD19  
NCOA7 MAP1LC3B  
GBAS MAP1LC3A  
WDR62 RALY  
OGT TRAK1  
KRTAP4-12 NPDC1  
SMAD4 RMND5B

PCBD1 DENND4A  
PRRC2A IFT88  
HERC2 USP42  
MAP2K5 CDC42BPB  
C8ORF41 RPAP3  
TCL1A AKT3  
NCL PCBD1  
ATP2A2 PLN  
SCNN1B ITCH  
UBE2B UBR2  
UBE2B UBR1  
MED13L MED9  
TP73 GNB2L1  
RAC1 TOPORS  
CASP3 DCC  
GABARAP FYCO1  
IL22RA2 IL22  
CD22 SYK  
AR SMAD1  
EZR VCAM1  
MMP2 IGFBP3  
IGF1R SHC1  
MAP3K1 UBE2W  
IL1R1 IRAK1  
EED HIST1H1C  
YWHAG KLC3  
RAP1A RHEB  
MMP2 LGALS3  
PAX5 EBF1  
CALM2 TRAF2  
CALCA CALCRL  
POLR2G USP44  
YWHAB PHB  
TCEAL1 TCEB1  
MDM2 EP300  
ME2 RAB11A  
RHOA NET1  
VDAC1 DYNLT3  
STAMBPL1 OTUB1  
SF3B3 TAF9

DAO DAOA  
PPP1CAPHACTR3  
MED6 MED15  
GBP2 KLHL20  
SON SNIP1  
NOL3 PACSIN3  
PPP5C GNA12  
NR3C1 FKBP4  
NOL8 RRAGA  
REXO2 TRAF6  
PAK2 SH3RF3  
PSMB1 TNFRSF14  
CCNA1 STOML2  
PFN2 IK  
SOS2 COPS5  
CCNK RFX6  
EMD DDB2  
CLDN5 CLDN3  
GABARAPL2 RASSF1  
VHL ARF6  
PPP1CAPPP1R13B  
RB1 TMPO  
TGFB1I1 VHL  
CTNNB1 CREBBP  
EGFR CD44  
YWHAG PHLDB2  
PMF1 MED31  
CALM2 DLG1  
MAPK1 TOB1  
DDB1 DCAF5  
CSF1R THOC5  
HRAS ARHGEF1  
SGK1 DDX6  
FLT1 CTNNB1  
SH3D19SH3YL1  
RB1 TMPO  
SRSF1 ZRSR2  
TNNI2 ACTB  
EPRS RPF1  
RRM1 YWHAG

MAP4K4 MDM2  
SYT1 STX4  
SIX3 AES  
EWSR1 YY1AP1  
FLT1 PLCG1  
ACTB SRCIN1  
DIAPH2CDC42  
MED16 MED19  
SRCAP KAT2B  
MGRN1UBE2I  
UBC MALT1  
F10 PROS1  
PIN1 ZNF828  
BRD4 MED1  
ATN1 KRTAP4-12  
IL6ST PRKCD  
TP73 GAS8  
S100A9 USF2  
SNCA BCL2L1  
DNAJA1 RIPK3  
RAB5A RAB7A  
RAB5A RAB5C  
CHD4 HDAC2  
BRD4 CRK  
SEPHS1 C14ORF1  
VIM TNFRSF14  
VHL ATP5J2  
PXN ASAP1  
DLG4 DLG2  
IFNAR1 FANCC  
PLK1 C20ORF94  
H2AFX YWHAZ  
RAB11A IKBKE  
MAPK3 DUSP1  
CD72 PTPN6  
RASGRF2 EPPK1  
AR NCOA1  
PHGDH MAP3K3  
BTRC NFKB2  
CPSF1 TAF12

ANK2 SIGMAR1  
CDC45 ORC3  
ZFP36 UPF2  
RFC3 FAN1  
SH2B2 JAK2  
CDC25B CREBBP  
ARAF PBK  
FRA10AC1 RP4-788L13.1  
TAF10 PHF21A  
DLST TUBB2A  
APP TM2D1  
RPS6KA5 STAT3  
NASP HIST1H1A  
CDK1 CREM  
NUP107AHCTF1  
COPS2 CUL5  
PIK3R2 ABI1  
SMAD7 TGFBR2  
SOS1 EPS8L1  
RARG ITGB1BP2  
ACTB TANC1  
AIRE HIST1H2BO  
CD2 CD58  
MCC KATNAL2  
CFTR DNAJC5  
PAFAH1B3 PLEKHM1  
GNAS SOAT2  
RFC3 USP20  
FOXO3 BRCA1  
NEFM STXBP1  
CSNK2A1 PACS1  
GNAI2 DRD2  
JUND MAPK3  
FAM107A HOOK2  
NCKIPSD BAIAP2  
YWHAG USP37  
HDAC1 MBTPS1  
ZBED1 GPSM1  
DAO ABP1  
BRD4 NCK1



TOM1L1 PDPN  
SNCA BAX  
RPS27A NEDD8  
SKI RPS27A  
PRKCA KCNE4  
VBP1 PAN2  
HSPE1 FBXO11  
CDC25B KRT35  
FGR DOK1  
DEDD GTF3C1  
APP KLK6  
MCF2 GNA13  
PPP2CA PPP2R2C  
EIF1AX IKBKG  
TFAM TNIK  
GPS1 COPS5  
APP APBB2  
KIF1B INADL  
PRPF40A CAP2  
PRKACA CSK  
PARK2 RGS2  
IFITM2 PTCD3  
TNFRSF14 FAM113A  
BCL2 PPP2CA  
SNX2 PDGFRA  
IRF2 CSNK2A1  
ERBB2IP PICK1  
PRKD3 IKBKG  
DYNC1H1 DYNLRB1  
IRAK2 SMURF1  
KCNQ1 AKAP9  
LYZ CNBP  
ARAF VCPIP1  
PPP1R12A PTPRJ  
UBE2G1 RBCK1  
NMI TUBA3C  
CASP3 PPP3CA  
ATG12 TGM3  
FANCD2 TRAF6  
ESR1 CDC25B

HSP90AA1 STIP1  
GRB2 SHKBP1  
AP1G1 AP2M1  
CD2 CD53  
UNC119 FKBPL  
PPARGC1B ZFP64  
NUDT11 TRAF6  
MYBL1 HIPK2  
CUL4B WDR76  
GLUL PIAS3  
PABPC1 PRMT6  
TRIO RHOA  
SPRY2 EGFR  
PRC1 CDK2  
GORASP1 PRKD2  
UBE2E1 RFWD3  
SKP1 GPS1  
STUB1 MAP3K2  
IGFBP4 PAPP  
PTP4A3 BAG2  
FNBP1 DAAM1  
TP73 DNAJB6  
BMPR1B BMPR1A  
BMPR1B TGFBR1  
HIST1H1C WDR5  
DAXX RASSF1  
CASP4 DCTN1  
PAX3 SOX8  
RPS27A STK11  
NCBP2 EIF5  
CIAO1 USP11  
NFKBIA IKBKE  
RNF40 RB1  
MCC RAB21  
EIF5B SMAD2  
XPO1 ADAR  
CSTF3 CDC73  
WIPF1 PACSIN2  
CDH15 CDH9  
SSH1 CFL2

CDH15 CDH7  
PTP4A3 AIFM1  
DLX2 NCOA2  
ABHD16A IFITM1  
MAP7D1 COPS6  
FANCA HPRT1  
SNAP23YWHAG  
UQCRC1 RTN4  
APC NUP98  
CBX1 H3F3B  
WNT2 SFRP1  
PTPRC NSF  
IGF2R AGA  
EEF1A1 STMN2  
HIST3H3 ASF1B  
PTP4A3 ATP1A4  
EMD SLC7A9  
HLA-F LILRB1  
BAG6 SETDB1  
RAB3GAP1 DMXL2  
TNFAIP3 YWHAZ  
MET PIK3R1  
NOS1 CTBP1  
USP19 IARS  
MAP4K4 RAP2A  
MNAT1 TSC1  
ACTB MDM2  
YWHAQ KANK1  
SKIL SVEP1  
H3F3B SSRP1  
APC CSNK1E  
RHOA SRGAP1  
FOS MAZ  
SFPQ EXOSC5  
GOLGB1 GORASP2  
IFT20 ABI2  
E2F2 RYBP  
GPR37 HSPA1B  
AKAP7 MEPCE  
DEDD CASP10

CLTA SMAD2  
CTLA4 TXK  
CFTR GOPC  
NCK1 WAS  
CLN3 IMMT  
EHMT2 MED23  
INPP5D CSF3R  
EMD SPTAN1  
FNNTA CENPF  
MDM2 FAM171A1  
PSMD14 PLEKHB2  
IRS4 RELA  
VCP UBE4A  
MAP1B RASSF5  
MYO1C USP20  
HCK SF3B3  
PSEN2 FLNB  
SETDB1 GIPC2  
GARS ELF3  
GH1 EIF3L  
PRMT5 JAK1  
MARK3 CDC25C  
LYPLA2 MED31  
CCND1 RBL2  
POLA2 FGFR3  
FBXW5 KRTAP4-12  
ITGAV CD47  
OCLN SMURF1  
IPO4 GSTK1  
PARK2 UBE2J1  
CHN1 GTF3C1  
GRB10 MEGF10  
SYMPK GSTK1  
ETV4 EP300  
TUBA4A RTN4  
SCT MEP1B  
CDKN1A STAT3  
MCC NUDT5  
CTNND1 PSEN1  
CD2BP2 P4HB

KRT32 CDK12  
VIM HMG20B  
CTNNB1 EP400  
ZNF609 ATXN1  
HSPA5 RIPK1  
SPR YWHAZ  
PMF1 GIT1  
SNRPA SFPQ  
STAT3 IFNAR2  
PTPN1 LTK  
SRC ISG20L2  
ATG10 ATG4B  
THBS1 COL7A1  
TP53 RAD51  
NELL1 GFI1B  
GEMIN4 MAP3K1  
RHO RPS27A  
TAF5 TAF9  
PSG4 SMAD4  
AK1 FHL2  
KRT82 LYAR  
TP73 SUMO1  
C1ORF65 C1ORF190  
PPP1R13B CDC5L  
XPO4 GSTK1  
PMEPA1 UBQLN4  
ZNF225 PFDN5  
TP53 WDR33  
PAFAH1B1 HSPH1  
BRCA1 MRE11A  
BAG6 DPT  
GRB2 RDH11  
GRB2 NCKIPSD  
MEF2D SRFBP1  
RUNX2 STUB1  
DRP2 DAG1  
PARK2 LIMK1  
CHEK2 STRAP  
GH1 BTRC  
WNK1 MAP3K2

CLTC STAMBPL1  
MLLT10 DOT1L  
ESR1 CUL4B  
FLOT1 ARG1  
NFKB2 DYNC1H1  
COPS2 UIMC1  
CLIC3 DNMI  
TRAPPC2 JOSD2  
ERN1 TRAF2  
CDH15 BOC  
FOS RNF20  
RGS20 FAF2  
ERBB2 NRG1  
MYC EP400  
HSPA4L TCEAL1  
CD28 PLCG1  
MAPT PIN1  
TARBP2 TRAF4  
PBX2 SKIV2L2  
SCT MEP1A  
CTNNB1 RAB8B  
RPF1 HNRNPK  
SQSTM1 NTRK3  
SGK1 VCP  
TCEB2 TCEB3B  
PSMD4 PSMD2  
EFEMP2 FAM115A  
POU2F1PBX1  
SUMO4 STRAP  
ZNF208 SRY  
MDM2 RYBP  
SGSM2 CHD3  
ARHGAP1 BNIP2  
GNAO1 RGS19  
FLOT1 APP  
GNAO1 RGS4  
LHCGR CANX  
LGALS1 GEMIN4  
ACAN MMP14  
DPYSL2 DISC1

SH3BP5MAPK9  
SH3BP5MAPK8  
SMAD4 FBXO34  
SNRPA RNPS1  
TP53 SMARCC1  
MBD4 CSNK2B  
GATA2 MED1  
TP53 SMARCD2  
KALRN COIL  
GFM1 SMURF2  
GNMT NIF3L1  
TAF4 KAT2A  
PHB2 NUP205  
AFP HLA-B  
USP8 STAM  
LMNB2 PRKCD  
CRK GAB1  
MS4A1 CD40  
ITGA4 PTK2  
GRB2 RIN3  
PRKDC RBBP8  
GRB2 SMARCC2  
CSF2RB IL5RA  
CALM2 TFCP2  
GZMB XRCC4  
POU2F1HMGA1  
HSPA5 H2AFX  
GLI2 STK36  
SNRPE SRRM1  
PRRC2A EIF3E  
UBE2N MARCH5  
GRAP2 SOS2  
CBL ITSN1  
KCNQ1 KCNE4  
METAP2 CDC42  
TRAF3IP1 DISC1  
HSP90AA1 QARS  
ARHGDI1 NEDD4L  
GNAO1 RGS7  
PCMT1 IKBKE

CSK DOK1  
TUBB4 RELA  
PRKCB SPTAN1  
VHL RAB11A  
PPP4C RPAP1  
EN2 FOXA2  
HDAC4 FOXP3  
IKBKE XPO5  
EIF1B CBR1  
IKBKE CACYBP  
DAND5 SIN3A  
HNRNPA2B1 CSNK2A1  
IKBKB TIMM50  
SOCS6 ACTL7A  
SRI CACNA1S  
ZBTB43TRAF2  
TRIM63GMEB1  
RAF1 MAP3K5  
MCM5 PRKAB1  
GH1 ANXA2  
MYO9BARFGEF1  
POLR2H POLR2K  
JUND MAPK8  
PIAS1 SERBP1  
TOP2A PRKCA  
ANKRD1 MYPN  
COIL HABP4  
SMARCB1 CHD7  
POLA2 XPNPEP1  
JUND MAPK9  
SLC25A5 NFKB1  
SHC1 CBLB  
PTP4A3PDCD6IP  
HTT NBR1  
HSPE1 ILK  
HDAC3 ESR1  
U2AF2 ZRSR2  
STAMBP TRIP13  
SMNDC1 WWC3  
RAN SMARCB1



RXRA COPS2  
MOAP1 RASSF1  
PLCB1 MACF1  
TACC1 YEATS4  
PIK3R1 ALS2CR12  
F10 MGST3  
DNMT1 HDAC1  
SOD2 KIAA1549  
GLI3 ZIC1  
CCDC85B HMG20B  
ITGB1 CD151  
ZMIZ2 SMARCE1  
FOXO3 FOXG1  
DDX19B KLHDC2  
PSMD6 PAAF1  
H2AFX EEF1A1  
INPP5D GAB2  
KRT77 NFKBIL1  
BCAR3 BCAR1  
MOAP1 UBQLN4  
ENG BMP7  
SRSF11 SMAD2  
CDKN1B TRAF2  
MAP3K5 MAPK8IP3  
KCNA4 DLG2  
PRELP FBLN2  
CDC5L CRNKL1  
HSPE1 UNC119  
POLR1C TAF1D  
AQP1 ADAMTSL4  
U2AF2 SF1  
UBE2D3 UBE4A  
GRIN2D FUS  
TP53 COPS5  
VHL POLR2G  
COIL C1QBP  
MAGEB2 SRRM2  
TADA3 USP5  
LPXN PTK2B  
CASP3 CDC42

COPS6 DTL  
SRC SYK  
CDK8 MED8  
ZNF142 CHMP5  
CDH18 CDH9  
FOXO3 EP300  
MED24 THRA  
ABCC9 KCNJ11  
RB1CC1 POLR1E  
TNFRSF1B CAD  
IFNA2 IFNAR1  
MTOR AKT1S1  
ATF6 ATF6B  
HIST1H1B H3F3B  
PFDN4 PFDN2  
BMPR1A TGFBRAP1  
CLCN3 GOPC  
THBS1 CTSG  
DCTD NIF3L1  
GRIN2A DLG1  
FN1 COL4A4  
FGFR2 FGF9  
STK4 MAP1LC3A  
VCP FBXO6  
USHBP1 NOC4L  
TP73 HMGB1  
EZR CDK5  
TPST2 CMKLR1  
PCNA XPC  
HP ITGAM  
PGK1 SUMO4  
SYNJ2BP LRP8  
KCTD13 VTA1  
MED6 SMAD3  
PSMB4 PLK1  
PPAP2BSHC1  
MYC CDK6  
POLR2G EWSR1  
KCNH1 KCNC1  
BRCA1 SUMO2

VCP IKBKE  
KCNQ1 GRB2  
ZFYVE9 SUMF2  
HIST1H4I TAF1A  
MEF2C VGLL2  
SELE PTK2  
VGF GRB2  
SOD1 PPP3CA  
PDGFA PDGFRA  
DDB1 DCAF17  
TRAPPC6A HOXA1  
DLG3 SEMA4C  
SMAD9 PNPLA2  
MCC STOML2  
EIF4E2 KRT20  
BCAR3 NASP  
BRCA1 LMO4  
GRB2 TJP1  
GH1 CAPZB  
MLH1 KPNB1  
TAF7 TAF15  
HSP90AB1 SPTAN1  
CDK18 SEC23A  
COPB2 PRKCE  
HSPB1 MME  
HIST2H2BE TNPO1  
FGFR1 FRS2  
DNAJA3 MAP3K3  
YAP1 ERBB4  
EPM2A HSPA5  
MAPK13 MAPK8IP2  
MCM2 PLK1  
POLR2C INTS1  
LMNB1 TMPO  
LMNB1 TMPO  
MCM2 CDC6  
ITGB7 GULP1  
LGALS4 RRAS2  
PARP1 E2F1  
PRAM1 MBD1

RAC1 ARHGEF4  
PCM1 ABI2  
MAP3K7 SMAD3  
RPA2 ATM  
GABPA CREBBP  
RNPS1 DDX24  
HLA-C RHPN2  
EDA2R TRAF6  
THBS1 CD36  
APC MYO10  
CUL4A POC1B  
RPS27A SMAD1  
RPS27A SMAD2  
WNK1 RPH3A  
CALM2 MAP3K12  
FOS CSNK2A1  
MYST3 ING5  
MARK2 USP21  
BCAS2 MCC  
GSK3B KRBA1  
COMMD7 COMMD1  
STK4 SAV1  
SSSCA1 CCNH  
SRSF4 SRPK1  
PLAT CKAP4  
PRPF4B KLF13  
SHC1 CALCOCO2  
CD40 UGGT1  
PSEN2 APH1B  
JARID2 EZH2  
CA2 HSPD1  
FASLG EPS8L3  
PRKCZ PARD6A  
KRT74 ALK  
MAP3K7 PPM1B  
GRB2 RAPGEF1  
SERBP1 PIAS3  
TUBB2A RPA2  
GORAB SCYL1  
MED23 MED19

EIF4E MAPKAPK5  
HERC3 HERC6  
CTSA LAMP2  
VCP WRN  
PAFAH1B3 MED31  
SNAP29VAMP7  
TEK IKBKG  
PSEN2 CIB1  
KLF4 TP53  
FLNB FBLIM1  
DVL1 DYNLT1  
TP53 BRF1  
HTT CREBBP  
TPM2 ADRBK1  
TP53 KAT5  
MCC RPS14  
MAP4K1 BLNK  
DAP3 CNBP  
HTT SYMPK  
PRKCB TOP2A  
PRKCA BTG2  
REPS2 ASAP1  
ADORA2B DCC  
AKAP9 ACTR3B  
IL4R SHC1  
FASLG BID  
NUDT21 HDAC1  
PIAS2 CDKN2A  
IL4R PTPN6  
GTF2E1 AES  
MKI67 SUMO2  
SUMO1 RWDD3  
PPL PAK2  
NXPH3 NCK1  
CDC25B DOCK2  
TRAF1 TICAM1  
TP53 SP3  
NFYB HDAC4  
ORC4 DBF4  
BCAR3 RTN3

LBR AKAP8L  
SHC1 PAK1  
SYK PAG1  
RAD21 STAG2  
CGNL1 WNK1  
HLA-C SARS  
TBP SIN3A  
PCBP3 RNPS1  
GAPDH PRKG1  
GNAQ RIC8A  
SERPINE2 COL4A6  
FOXK1 AMOT  
HDAC1 PHF21A  
ILK MMS19  
CRK ATXN1  
CCND1 HDAC2  
TOM1L1 TOLLIP  
APC NCKAP5L  
IPO4 PHLDA3  
MED25 CREBBP  
APC NUP153  
APC RANBP2  
GH1 STRAP  
MARCKSL1 DCTN2  
ATXN1 ATXN2  
CRADD C14ORF1  
RELA SETD7  
HTT KAT2B  
LCP2 BLNK  
RPF1 CPSF1  
VIM CREB1  
CTSD ATP6V0A1  
EPHB2 CRK  
TGFB1 LAMB1  
FBXW7 NFKB2  
ETHE1 INSL6  
GHR PTPN1  
PARK2 SNCAIP  
LUC7L3 SRSF1  
HMGB2 POU3F1

MCM2 MOBKL3  
GH1 PAM16  
PPP2CA PPP2R3B  
LALBA HIST2H2BE  
IGHG1 SWAP70  
IGF1 NOV  
APC ZSWIM6  
DDX19B IKBKG  
FHL2 E2F4  
PRKCE RPS6KA2  
NR5A2 NPPA  
HIST1H1C ASXL1  
NCL ZNF689  
PRKCZ C1QBP  
CLDN1 INADL  
EMX2 GTF2A1L  
MYC SRFBP1  
MCL1 USP9X  
ACTG1 CFL2  
EPPK1 SRRM2  
INPPL1 CSF1R  
PTPN11 NTRK2  
JAK2 TEC  
SETDB1 DNMT3A  
LPHN1 PLCG1  
PSIP1 DAND5  
HDAC4 NFKB2  
PGRMC1 SFXN1  
CD46 DLG4  
RORA COPS5  
ANXA2 MAP3K4  
STAM2 USP8  
MAML3 NOTCH4  
ESR2 MED10  
ENAH GPHN  
VCP SH2D2A  
RBBP9 RB1  
BCR GRB10  
CTNNB1 L3MBTL3  
APC BTRC

ORC5 CDC6  
MEN1 POLR2B  
TUBB RBBP5  
ZNF35 CDC5L  
SIX3 PAX6  
SCNN1G RPS27A  
COL3A1 DDR1  
GNPDA1 EWSR1  
FKBP4 SH3GLB2  
GNAQ PLCB1  
APOE ST13  
RPL35 TRAF6  
DRD4 GRB2  
PBXIP1 TSNAX  
TRAF1 MAP3K5  
JAK3 STAM  
APBB1 TSHZ2  
UPF1 UPF3B  
SYNCRIP A1CF  
BGN DAG1  
RASA1 AURKB  
MYOM2 TTN  
MAPK6 ARMC4  
IKBKE SERBP1  
WDR61 EZH2  
VIM STX1A  
TOP1 SRSF1  
NLGN3 NRXN2  
MAPK13 MAP2K6  
KIF5B USPL1  
SMAD9 LMO4  
TAGLN2 FTSJ1  
SACM1L COPG  
SERPINA1 KLK5  
FN1 NOV  
MLLT4 EPHA7  
MAP2K7 C5ORF42  
RPS14 TAF9  
HSPA5 UBQLN4  
UBTF MAPK3



EIF3F RPS6KB1  
INO80E INO80  
CASP4 PSEN1  
ORC4 ORC3  
SUMO1 IKBKG  
PRPF40A IL1RAP  
NOTCH1 MAML3  
KCNH1 ALG10  
TIMM44 PRPF6  
SDHB GEM  
FASN EWSR1  
RIOK3 CALM2  
SMAD3 DOCK9  
PAPOLA CPSF6  
CIAO1 KIAA1967  
SKIL PIAS3  
ORC3 SH3BP2  
EPHA4 EFN3  
LATS1 RAC1  
PRKCB BMP2  
LIN7A DLG2  
INSR GNB2L1  
PDX1 ALK  
PSMD3 HLA-B  
S100A16 S100A14  
RGS16 CSK  
HSP90B1 RAE1  
DLG4 LIN7B  
ADRBK1 ARRB1  
CTNNB1 SMARCA4  
PSTPIP1 RUVBL1  
FOS ATRNL1  
PTPN1 ACTA1  
XRCC6 CCNA1  
STAM ASAP1  
PRKDC MAP3K3  
RBPJ NOTCH3  
SIRT2 SIRT1  
ETFA ETFB  
APTX PICK1

S100A8 CEACAM21  
ZNHIT1 MAPK11  
ERCC2 GTF2H5  
CBX1 DNMT3B  
RCC1 RAN  
YWHAG YWHAH  
STK11 WDR48  
MLC1 MYLK  
PF4 SDC2  
ACP5 ZBTB16  
PPP2R1B PPP2R2A  
PXN EPHB1  
KPNA6 KPNB1  
GABARAP TBC1D15  
RAC1 HPS4  
PLXNB1 PLCG1  
GANABTRAF6  
FHL2 ZNF626  
NFKB2 TFG  
TGFB1 THBS1  
KCNH4 MAP2K1  
UBE2Q1 STUB1  
SPOP TRAF1  
GLUD1 GOT2  
PSMD11 C7ORF64  
TNFRSF10A FADD  
ATG12 HIST1H2BG  
PPP1R2 PPP1R9A  
SKI SMAD2  
PRPF40A HIPK1  
SKI SMAD1  
PDK1 PKN1  
APC ANO8  
TP53 MNDA  
TUBG1 PXN  
MED26 CEBPB  
NR3C1 RANBP9  
CALM2 NFKB2  
PDK1 PKN2  
HADHA NFKB2

GEMIN4        CALCOCO2  
C4ORF41      TP63  
PLCG1 SNX17  
TOP2A SUMO4  
CLN3    ESYT2  
TP53    HNF4A  
RARA    ZBTB16  
RPA2    ACTB  
TNFRSF10B    MSN  
FUBP1 MYOC  
UBE2L6        RNF25  
TOB2    RPS6KA1  
CPNE4 BICD1  
SLC2A4DAXX  
STAT1 COPS5  
HSPA1B        DNMBP  
MAP7D1        USP20  
PXN    TLN1  
CUL4B WDR61  
ARPC2 ARPC1A  
PIAS1    RELA  
FASLG SH3GL3  
ERCC5 ERCC6  
CRCP    VAV2  
FOXH1 FOXG1  
RHOQ    CDC42EP4  
ITGB1 ITGA2  
TGFB2        RPS27A  
NCK1    GRB2  
EIF3H    EIF3I  
GSK3B SMYD2  
IFITM1 CR2  
XCR1    XCL1  
RAF1    PAK2  
NFKB1 NCOA6  
MCM6    SMC1A  
NFKB1 YWHAG  
BVES    RPP25  
DOK2    LCK  
PSMD4 PELO

SETDB1 TSC22D1  
TOR1AIP2 USP3  
CHAF1A WNK1  
HNRNPA1 PURA  
SCAMP1 UBE3A  
SGSM2 ILF2  
XPC CHAF1A  
YWHAB MLLT4  
RPS5 SRRM1  
RAF1 MAPK7  
SUMO1 NCOA1  
RXRB NRIP1  
ANXA9 NDUFA4L2  
RPAP2 EHBP1  
RZR1 HOMER1  
COL4A3 CAMK2B  
TRMT11 WDR48  
CREBBP TCF12  
CDKN1A CCNA1  
PDZD3 ABCC2  
IGF2BP3 MEPCE  
STK4 GABARAPL1  
EPS15 UBQLN1  
PAX5 DAXX  
FN1 IFI27  
BMI1 KAT5  
DLG1 CNKSR2  
RAF1 PAK1  
CD46 LLGL1  
PLAU SERPINF2  
TUBB TAB2  
RARG NR0B2  
RET CRK  
PRPF4BPNN  
AKR1C3 UBE2W  
RFC4 RFC1  
ATXN1 SMARCC2  
RFC4 RFC2  
SMARCA2 SMARCD1  
NCK2 CPSF7

NPM1 PINX1  
CSNK2A2 TAF1D  
CLSPN FBXW11  
LATS1 ZYX  
S100A4 MYH2  
CLGN ADAM2  
FHL2 TTN  
KPNA6 MEPCE  
CTNNB1 PSEN1  
RELA PPP1R13L  
ITGA6 CD82  
OSBPL9 HIST1H2BL  
TNFRSF1B TIMM50  
GRIN2B CAMK2N1  
MMP1 IGFBP3  
NUDT21 SNRNP70  
RAC1 PLCB2  
NR5A1 SMARCD3  
VPS72 MDFI  
HSPA1B NFKB2  
CBL ITK  
MRPS34 DLG1  
HDAC1 HIC1  
SHC1 LCP2  
SNAPIN SMAD2  
SUMO1 NCOA3  
BMI1 CBX2  
RPS6KB1 PPP2CA  
CALR FBN1  
PTPN4 EEF1A1  
SVIL P2RX7  
RNF185 UBE2D4  
PDAP1 MEF2D  
C7ORF64 SH3GL3  
CHD4 SMARCC1  
BCL10 NLRC4  
CDH2 CDON  
MARCKS TOB1  
NOL3 TP53  
PCBP1 EWSR1

GCC1 MCRS1  
PHACTR2 PLCG1  
ATN1 FBLN5  
RAC1 COG5  
ID1 HES1  
RB1 CDK1  
F10 SERPINA10  
DHX9 EIF2C2  
IRAK2 PELI2  
PIK3R1 SPEN  
CALCOCO2 RNF11  
SOS2 ABI1  
UBC HDAC6  
USP46 RAD51AP1  
NCK1 RIN3  
GFAP S100A1  
TRIM37UBE2H  
STAT3 GNB2L1  
EIF3H DISC1  
MED8 MED28  
EPRS IKBKE  
HSP90AA1 TGFBR2  
DYNC2LI1 CCL26  
GRAP2 LCP2  
MYCBP2 YWHAZ  
VPS41 ZNF512B  
PRKDC CIB1  
PSEN2 APBA2  
CUL4B WDR48  
PDC CAMK2A  
ZNF3 ID3  
TCERG1 PSPC1  
ORC3 GAB2  
FN1 VHL  
SEC24BSEC23A  
SATB1 BAZ1A  
AURKBBARD1  
RELA TP53BP1  
RAF1 STK3  
EFEMP1 RERE

PPL MYC  
SFN MARK2  
PPL FOS  
CLTC AP1B1  
ECSIT STRN4  
PRKDC C8ORF41  
GHR GRB10  
GNAZ PRKCD  
RARA CKLF  
EGFR COL9A3  
NEDD9 DIMT1L  
CTDSP2 AR  
VIM PLEC  
IKZF1 AP2M1  
LYN FCER1G  
HRAS MLLT4  
GUCY1A2 GUCY1B3  
FANCMFANCE  
GZMB PRF1  
DLG1 DLG2  
PSMD14 LASS2  
TSC2 YWHAG  
TLE1 ZFP64  
HIP1 CASP8  
SAP18 EMD  
IL15 IL15RA  
RHOD SMURF2  
IFNAR1MAPK1  
C1QA PTX3  
TCEB3B KRTAP4-12  
ARIH2 SLC1A6  
THBS1 SELE  
NOTCH1 KAT2B  
NOTCH1 KAT2A  
C20ORF24 TUBGCP4  
CASP1 CASP14  
EFNA2 RUNX1  
PIK3R1 PTPN11  
SRSF1 SF3A2  
PCNA DNTTIP2

GPRIN1 TRAF3  
PDE4DIP GF11B  
GPRIN1 DUSP4  
CENPF NDEL1  
ISG15 HSPA4  
DUSP1 HSPA4  
UBE2H LRSAM1  
LUC7L3 RNPS1  
NR3C1 PML  
SNAPC4 ATG16L1  
KLHL20 C14ORF1  
CDC16 ANAPC10  
MKI67 KIF15  
CTTNBP2 ZRANB1  
CA2 USP42  
NANOS3 RNF32  
SERPINA1 DERL2  
MAPK13 SMAD4  
TBP TAF1D  
MUSK RAPSN  
SPI1 DNMT3B  
SMC1A STAG3  
TFDP1 NPDC1  
GRB2 CHRND  
TRAF3IP2 TRAF2  
PRMT5 JAK3  
MAPK9 DUSP4  
SS18L1 BRD1  
NEK1 FEZ2  
ITGAV ITGB5  
PCBP1 WBP11  
VOPP1 SMPD3  
GF11B EGFL7  
TADA3 ING5  
CACNA1A KDM5B  
SSSCA1QRICH2  
RSU1 ACP6  
DNAJA1 GSTK1  
PRKCA PEA15  
SRC POLD1



EPX NCK1  
PPP2CAPPME1  
DMRTB1 RBFOX1  
BIN1 ASAP2  
VIM ITGB4  
MAPK6 DDX23  
RGS12 GRM2  
HDAC3 GATA1  
ANKRD28 USP49  
ACTG1 RUVBL1  
RNASEH2A YY1  
KPNA1 AICDA  
ESR1 PSMB9  
DNAJA1 LSM2  
SNRPF GEMIN6  
FCHSD1 ASAP1  
JAK3 INPP5D  
SUMO1 SETBP1  
TNFRSF14 LHPP  
RAB5A AGTR1  
BCL2L11 SMARCB1  
CTNNB1 FHIT  
FXR2 NECAB2  
PIN1 PRRC1  
SNAP23STX6  
PTP4A3 PDS5A  
PCBP1 GSTK1  
TSC22D1 CCDC90B  
APC GSK3B  
IQGAP1CDC42  
GP5 YWHAZ  
NEK2 MAD1L1  
NOL8 RRAGC  
RPS28 PSPH  
SOCS1 COMMD1  
CBL TNFRSF11A  
HNF1B PCBD1  
RELA BARD1  
CTSL1 IGFBP3  
PLSCR1SLPI

HIST2H2BE DYRK2  
CTNNB1 NDRG1  
PRKACA WT1  
DCTN2 GOLM1  
YWHAB ING1  
FES PPID  
FGF4 FGFR3  
UBE2I CHMP4B  
SF3B1 TOPORS  
NFKB1 PDCD11  
EIF3D SMAD2  
BTK ITK  
BZRAP1 TSPO  
NFASC ANK1  
MDM2 UBE2U  
ACTG1 RUVBL2  
CYP27B1 SMARCA4  
RAB5A GGA2  
INSR ACP1  
DVL1 RAC1  
RBP4 TTR  
RBP4 ALB  
VPS16 AKTIP  
DDB1 KAT2A  
ATXN1 ZCCHC13  
VAV2 DCUN1D4  
RAB5A GGA1  
TNK2 PTPRJ  
KPNB1 PIAS4  
YWHAE ADAM22  
TAF1 TAF9  
SLC8A1YWHAE  
MCM5 ORC6  
SSR4 TNFRSF14  
USP22 USP27X  
JMJD1CESR2  
HSP90AA1 AKT2  
ROD1 TOLLIP  
XRN1 DPP7  
CTNNB1 YWHAZ

RAC1 PARD6A  
TNFAIP8 PTP4A1  
EMD C1QBP  
GH1 SEPT2  
MAP3K7 HSPA1L  
C17ORF28 BEGAIN  
SLC38A1 SETDB1  
HSP90AA1 AKT1  
RPS6KA1 ZFYVE16  
NFKB1 ZBTB9  
GAK AXIN1  
CHRM1 GPRASP1  
ADPRH HIST1H1A  
ADRA2C PPP1R9B  
SP3 GPRIN1  
HAT1 ATG10  
GADD45B PPARA  
USHBP1 EXOC7  
RBX1 FBXO22  
TLE1 HES1  
SNX2 FNBP1  
USP11 RNF2  
HTR2A NTRK3  
ZFAND5 TNFAIP3  
SET RRN3  
SYT1 TFPC2  
NACA CCDC90B  
SPTA1 PLEC  
MXD1 HDAC1  
CCNA2 TAF1  
SNCG FABP4  
ATG5 REXO2  
GRB2 NACA  
APOA1 ATP5B  
NFKB2 IKBKG  
PIK3R1 PSMB5  
MAZ BPTF  
HNRNPA2B1 ZMYM2  
SCNN1G USP10  
CDK5R1 AATK

NUP107NUP133  
USP14 COPS5  
CDC42 TMEM66  
IRF3 LGALS12  
MCM5 PHLDA3  
NPHP1 NPHP3  
HSPB1 BRF2  
APC TNS1  
GNAO1 PDE6G  
NSUN4 EWSR1  
GSK3A CREM  
AKAP1 USP7  
HSPA1B TSSK6  
UBE2K MARCH3  
BIRC2 UBE2W  
FANCMFANCB  
POU2F1RXRA  
PGR HMGB2  
MSH2 MSH6  
VIM RERE  
CDC42 MOBKL2A  
DAZAP2 UBQLN4  
BCR UNC119  
TBC1D4 C12ORF35  
DRAP1 ARHGEF10L  
CDC73 MEPCE  
RELA TSC22D3  
CREM CREB3L1  
CDC42EP1 MAPKAP1  
ATXN1 SUGP2  
IFT20 IFT57  
TNFRSF1B XPO5  
CFTR DNAJB1  
SATB1 SIN3A  
MCRS1 CCDC53  
GRB2 SHROOM2  
MYH9 CD163  
ROR2 FZD5  
ITGA6 PCSK5  
ITGB3BP COL4A3BP

EIF3E COPS7A  
PEX6 ATF7IP  
TP53 ERCC3  
TRIM37TRAF6  
PLK1 CEP55  
CCDC59 MAGED1  
TNFRSF1B SMURF2  
RFXANK BSG  
CDC42 BDP1  
VIM PKN1  
CBX5 BCL11B  
USHBP1 COPS4  
DCP2 NAGK  
NCK1 EPS15  
NUP210EXOSC5  
HIPK2 NLK  
ELF3 KRT82  
MYB SKI  
FOXO4 SIRT1  
GOT2 FTSJ1  
MCRS1 WBP11  
CEBPE ZFP2  
CSNK1A1 KPNB1  
CTBP1 HDAC2  
TMSB4Y EWSR1  
RAD51 DNAJA3  
HNRNPK RBM7  
MCM7 ATR  
CTBP1 RREB1  
ABL1 CABLES1  
ORC4 ORC6  
MYO1CRIPK3  
EGFR PPP5C  
XRCC5 PRKDC  
PDGFRB CRK  
HTATSF1 SF3A2  
MMP1 CCL2  
DNAJA1 TRAF6  
SMARCA4 STAT2  
GLI3 BTRC

TCEB3B C19ORF50  
THBS1 CFH  
POU2F1HDAC1  
ARNTL HSP90AA1  
TP73 SMARCD2  
USP11 TBL3  
KLHL20 LUC7L2  
TAF1B TAF1D  
APC SETDB1  
RBX1 ARID1B  
CDH1 CDC16  
PTHLH KPNB1  
PSEN1 NCSTN  
CBX3 VPS35  
SYN1 BLM  
SYNCRIP PRMT8  
MTMR3EXOSC1  
ESR1 CKLF  
IL3RA GRB2  
PGD ARF6  
MSH2 MRE11A  
UBE4B GZMB  
EIF2S1 PRKCA  
CTNNA1 FMN1  
RAC1 IL1RAP  
AKR7A2 F2  
MFI2 DERL3  
GABRB3 PPP2CA  
STK4 RASSF4  
SCG5 PCSK2  
SFN TPD52L1  
UBC NFKB2  
RAB5A APPL1  
SLC25A27 PRKAR1A  
HIST1H4I RPS27A  
C8A CD59  
DNAJA2 TOE1  
DEPDC1B BARD1  
MAP2K5 MAP3K2  
PHC2 AFG3L2

RPS3 YWHAZ  
MYC ATAD2  
TOMM70A APC  
NFE2 ELF5  
NONO SRRM1  
SSBP3 ZNF226  
TEAD3 VGLL1  
KIF5C KLC1  
BEND7 PSMF1  
OGT THAP3  
RAD18 POLQ  
ATXN1 ANKHD1  
TNNT1 TGFBR1  
CDC42EP1 KRTAP4-12  
HAX1 RELA  
VAV2 HSPH1  
TAF1 SIN3A  
RANBP9 RAPGEF2  
PSMD4 UBAC1  
UBR1 ARL15  
PIN1 TFG  
MEN1 MEF2D  
PLCG1 PRKD1  
VPS33AVPS16  
ETV1 KAT2B  
RBPJ SUFU  
CSDA GSK3B  
CTBP1 CREBBP  
ARHGDI1 CASP8  
RTCD1 DDX21  
CLN3 DDX20  
EEF1A2SRRM2  
GEMIN4 GEMIN6  
LCK LAX1  
VPS33AVPS11  
NUP214HDAC5  
CAP1 MYOC  
GDI2 ACTR6  
ARIH2 KIAA1377  
NFKBIA SUMO4

CENPA CENPO  
STX1A SYTL4  
PRKAR1A AKAP7  
EGFR CFL1  
PPP3CBNFATC2  
FOXO3 CREBBP  
NCAPH2 SMC4  
MRPL23 USP44  
CCBP2 CCL25  
CENPA KIAA1429  
RPS6KB1 CSNK2B  
ZNF3 FHL2  
IFNB1 IFNAR1  
CDK1 USP45  
TCF3 RUNX1  
CRK NR5A1  
ATF2 RUVBL2  
RNF166 UBE2Z  
GABARAP NEK9  
SRC CUL9  
IGF2BP3 POLR1E  
CCL7 FEZ1  
MEPCE EXOSC5  
SMAD2 NEDD4L  
MAPRE1 AURKB  
NTS MEP1A  
GUCY1A2 STUB1  
DIAPH1 BAIAP2  
IDH3A SUMO4  
RANBP2 CDC73  
CRKL BCAR1  
CCL25 CCR10  
MYCBP2 SFN  
MYCBP2 YWHAB  
GBP2 MAGI1  
COL4A4 HABP2  
EIF3H HSP90AB1  
ARL1 BRF2  
RB1 RBL2  
UBL4A PDE12



UHL1 KRT4  
AKT2 SETDB1  
NCOA2 ESRRB  
PNP ZHX1  
HIRA ASF1B  
CD4 SPG21  
MBIP NINL  
EPN2 CLTC  
PPP2CASTK24  
PCBP1 TSC22D4  
PRKCA YWHAG  
FAS HIPK3  
VIM KIAA1377  
CD48 IL18R1  
PRNP CSN3  
CDKN2A E2F1  
RORA PROX1  
YES1 FLT1  
ZNF193 ZSCAN30  
MEN1 HSPA4  
APC PLEKHA5  
ARAF MAP2K1  
POU2F1HMGB2  
GUCY2C GUCA2A  
CASK SDC1  
RANGAP1 TOPORS  
GPS2 C19ORF57  
SHMT2 GNAS  
JUP CTNNBIP1  
ITPR1 RYR2  
SKP1 NFKB2  
RPN1 IKBKG  
NCK1 NCKIPSD  
U2AF2 SF3A2  
SMAD4 RASD2  
DHX9 AKAP8L  
YWHAE SH3BP4  
HCK IRF2BPL  
BTG2 CNOT7  
DOK2 KIAA1279

GAB1 LAT2  
HPRT1 PRTFDC1  
SMAD2 DDX1  
DAZL DAZAP1  
ITGB1 PRKCA  
IKBKB ACTG1  
CTNNB1 GSK3B  
CSK PTPN18  
KDM1ARB1  
RIPK2 MYH10  
USP11 MYO6  
MECOM EHMT2  
RPA2 RPA4  
CDKN1B NUP50  
OTX1 MDFI  
PLK1 MDM2  
ZMYND11 EZH2  
GRAP2 KHDRBS1  
RNF20 PA2G4  
TCF7L2 DAXX  
GADD45G RARA  
TFAP2C CITED2  
SKP1 SKP2  
PHB AKAP11  
CTNNB1 PSEN2  
TFAP2C CITED1  
SULT1E1 C14ORF1  
BUB3 WBP4  
PGD GBE1  
OTX2 LHX1  
YWHAZ MEF2C  
CALCOCO2 ZNF451  
JAK2 HES5  
GABARAPL2 ATG3  
VOPP1 MTF2  
CBR1 IKBKE  
HDAC1 HES1  
DAND5 DDX5  
TFAP2B SSBP4  
GBF1 KBTBD7

ATXN1 TRIM32  
DAZAP2 RBPMS  
APP KAT5  
TRAF3IP2 TRAF3  
SMAD4 RASL12  
SH2D1A SLAMF1  
SNAPIN SLC14A2  
ORC3 PTPN1  
PSMA7 ACTR6  
MYH14 TRPM7  
EIF3E EIF3K  
SNRNP200 VHL  
OTUD4 DSG1  
C1QBP MAP3K14  
EXOSC10 TARDBP  
CBL CD2AP  
TNNI1 PKD2L1  
HCK MED28  
CRYAB HDAC1  
PRPF4B POLR3F  
BCAR1 ZYX  
CASP3 IL16  
STAT3 CREBBP  
TP53 NCL  
KCNA2 DLG1  
DGKD DGKH  
NFIB NFIX  
IRAK1 TOLLIP  
PIK3R1 CKAP5  
CUL1 COPS6  
MDM2 ARHGEF6  
NECAB2 NEK6  
PSMD14 C19ORF60  
NRAP TRIM63  
RIPK2 MYH9  
CRLF1 CLCF1  
HSPA1B PACSIN1  
MAML2 NOTCH3  
HNF4A HDAC4  
RAC1 TNFRSF12A

RELA ILF2  
TOMM34 ATP6V1D  
PELI1 IRAK4  
NFKB1 TMEM66  
GPRIN1GRIN2B  
BAHD1 TRAF2  
POLR2G MED28  
SNAP23STXBP5  
WIPF1 PACSIN3  
CYFIP2 NCKAP1  
NCOR1 PRAM1  
STAT3 HDAC2  
TOB1 TNKS1BP1  
MCM2 MOBKL3  
RALGDS RIT1  
ATXN1 ACACA  
KRTAP4-12 PLSCR4  
PML TOPBP1  
SMAD6 STAMBP  
CLU NR4A1  
GRB2 RAPSN  
ABL1 MICAL1  
CCDC101 USP22  
EGF LMNA  
CIAO1 NUP93  
CNTFR GRB2  
FEZ2 SMC3  
YWHAB GEM  
FXR2 DPPA2  
CAMKK2 OBSL1  
CDC73 PAF1  
SYT4 NRXN1  
CCDC85B CEP70  
CYP2C9 RNF32  
TBC1D15 MAP1LC3B  
RASA1 DNAJA3  
UBA1 BRCA1  
SCAP INSIG2  
PPP2R3A AKAP9  
ANXA2 SRC

TRIP6 SERBP1  
YWHAB ACIN1  
RANBP9 DYRK1B  
IFNAR2IRF9  
PRKCA DLG4  
EIF4EBP1 MAPKAPK5  
ANK1 ITPR3  
NPC2 DHDDS  
RELA PHB2  
ACTB HNRNPU  
MBIP EPB41L3  
FCGR2C CRK  
POLR2B RPF1  
CR2 CD81  
AP1G2 SYNRG  
DRAP1 TAF9B  
SLC25A6 TRADD  
FOXC2 KDM5B  
PPARA NR1H3  
MYO1CPHLDA3  
SHANK2 DLGAP4  
ADRB2 GRK6  
ZNF24 RPL37  
RAC1 BAIAP2  
ACVR1B FKBP1A  
PRKCE PRKD1  
RAB8A RAB10  
COL4A2 MAPK6  
COL4A1 MAG  
C20ORF24 IPO11  
CRX NRL  
SRRM1 DDX21  
DVL2 SMURF1  
PTPN6 JAK3  
REV3L CHEK2  
FOXP3 IKZF4  
SEN2 IKBKG  
CCND1 KAT2B  
SMAD3 KPNB1  
ATXN1 ATXN2L

PAX9 GTF2A1L  
GRIA3 LGALS12  
RNF130 TTLL3  
GRHL3 GRHL1  
VIM SIRT6  
CHRNB1 RAPSN  
RAN NEK9  
FYN GNB2L1  
NUDT21 MCC  
PPFIA3 PPP2CA  
UBA1 UBE2J1  
CUL1 FBXO18  
MYO9BLRRC41  
RTCD1 USP45  
RPL13 NFKB2  
PIAS1 PTPN1  
CDC42 DNAJA3  
ATXN1 DMPK  
PLSCR1RASD1  
MPDZ MKNK1  
USP6 RPS27A  
TBL1X NCOR1  
TNF TRADD  
UBE2L6 RNF122  
HDAC2 DNMT3B  
RGS1 TSC22D1  
STX4 STXBP6  
MTA1 CHD4  
PSTPIP1 BZW1  
SF3B3 SF3A2  
C20ORF24 XPO7  
DYSF CAPN3  
CIDEA CIDEB  
EDF1 CALM2  
HNRNPC SREK1  
CACNB1 CACNA1C  
PAFAH1B3 C7ORF64  
GNAQ RGS18  
GRB2 INPP5F  
RAB6A GOLGA1

STK4 MAP1LC3C  
IQGAP1GRIA4  
FES FKBP5  
VDAC1 TTN  
GSK3B VTA1  
FLNA YWHAG  
CDKN2A PSME3  
WAC UBQLN4  
CETP EWSR1  
FAS RHOA  
TLR4 TLR5  
BCAP31 ACTG1  
ORC2 ORC3  
PTHLH PLK1  
NCK2 ERBB3  
PSMA7 EIF1B  
TP53 YY1  
NCBP2 IKBKE  
WWP2 RASA1  
COIL TAF9  
FLOT1 CAV1  
TPD52L1 TPD52L3  
TOP3B C1QBP  
SYK BTK  
GSK3A EIF2B5  
SNAPIN HAP1  
EIF4B PAK2  
TARS VHL  
GZMB RAB27A  
NEK1 FEZ1  
TGFB1 ITK  
SLC9A3R1 SLC34A1  
SNRPF DDX20  
TCERG1 FANCA  
IRF3 TICAM1  
CSN2 NEK1  
MSN NCF4  
OPRM1 GNAI1  
ABL1 SHE  
G3BP1 GNL2

BCL2 BNIP3  
BCL2 BNIP2  
HGS PAK1  
BCL2 BNIP1  
HSD17B4 ACTB  
PML SNRNP40  
DAZAP1 ITCH  
DLGAP5 FBXO7  
TUBB4 MAP3K14  
RALB REPS1  
GABARAP CLINT1  
EIF2C2 TNRC6B  
NASP GRB2  
SUMO2 TP53BP1  
CXCL5 DARC  
TADA3 RARA  
EEF1D SRRM2  
UBE2D2 RNF181  
STXBP1 STX3  
YWHAG MAP3K5  
RAF1 BAG1  
PPP2R5D PPP2R5A  
C19ORF57 PEF1  
SLC34A1 MAST2  
APC PPP2R5A  
POLE2 KAT5  
CBL TLN1  
MBD3L1 DPEP2  
LRSAM1 GPR108  
TSC22D1 SFXN1  
HLA-A UGGT1  
STAU1 MAP1B  
E2F1 CDKN2A  
MDM2 JMY  
UMOD MMP8  
ANXA1 S100A11  
ITK IKBKG  
EGFR FER  
SUMO2 CHD3  
SART1 MAX



NFKBIE PRKDC  
HGS SNAP25  
CTLA4 AP1M1  
HDAC2 DPEP2  
PPP2CAMOBKL3  
CLSPN FZR1  
HTR2A AIDA  
XRCC6 RPA2  
GPRIN1 SPTAN1  
ARL1 GSTK1  
GH1 HNRNPC  
PRKCA CBL  
ISL1 LHX4  
APBB1 U2AF2  
SLC6A2PPP2R1A  
WDR5 WDR59  
PAK3 GIT2  
PLA2G2A CRMP1  
SGSM2 RGMA  
FGB KLK6  
TUBB1 ZMYM2  
RAF1 DMPK  
GOT2 VDAC1  
ANKRD1 TTN  
HLA-B MAP2K1  
EIF2S1 EIF2B3  
GCDH ECSIT  
CLPP C20ORF24  
EDF1 NRL  
HNRNPK PRMT1  
BIRC5 RASA1  
MLH1 ACER3  
S100B IQGAP1  
TFCP2 RNF2  
TSPAN3 EWSR1  
RHOA VAV3  
CDKN2A TBRG1  
DSC3 PKP3  
MAP3K5 STUB1  
PSMB9 PSMB10

FAM82A2 WNK1  
YWHAZ PDE3A  
MLH1 SMC1A  
CDA ZNF598  
BMP2 ACTR2  
DDB1 COPS5  
APBB1 HDAC1  
FLT4 IKBKG  
YWHAQ SRSF3  
ARID1A KLF1  
AP2B1 ATM  
FHL3 ITGA7  
GTF2H1 FAM190B  
CNTN2 CNTN1  
UBE3A UBQLN2  
TP73 WWOX  
EPN2 TFAP2A  
MARK3 HDAC5  
SH2B2 INSR  
CDH1 PSEN1  
IKBKAP ELP4  
MAP3K1 RPS27L  
TGIF1 MKKS  
CDK1 HSPA4  
F10 APOH  
PLSCR1 SHC1  
FGF1 FGFR2  
TAL1 HDAC1  
PAK3 ARHGEF7  
RAB27A STX1A  
XPO1 KIF17  
SRSF2 PRCC  
STK25 IKBKG  
DLX5 SPEN  
AQP4 AP3M1  
NOP56 BMPR2  
AP2A1 EHD1  
TICAM1 TRAF4  
RELA PRMT1  
RRAS RALGDS

TERF2 TINF2  
CLDN7 EPCAM  
TP73 IGF2BP1  
TSHR CALR  
CXCL13 FGF2  
BUB3 ADRM1  
RXRG PNO1  
TRIM37RPS27A  
RTN3 PTPN9  
EIF2C2 DICER1  
CALCOCO2 LSM4  
EID2 EID2B  
HSPD1 HDAC1  
PSMD3 BLM  
KIF5C KIF5B  
HGS CBS  
RARA WTIP  
CCNB1 CCNF  
CTAGE5 ABL1  
DNM2 TRIP10  
TNF CAV1  
SSR3 GSTK1  
TNFAIP8 FLNC  
CDC16 ANAPC4  
RAB30 SMAD1  
HDAC3 AKT1  
HLA-B EZR  
CDC16 CDC23  
CDC16 ANAPC7  
TOP2A CSNK2A1  
CTNNA1 TSPYL1  
AURKAGSK3B  
ICAM2 MSN  
YWHAZ KIF23  
USHBP1 MED28  
CAV1 ILK  
CBX5 NSL1  
PCDH8 UBQLN4  
CTNNB1 VEZT  
ITGA2BCIB1

PARK2 PAFAH1B2  
NDUFB8 EIF2B3  
STAT1 CREBBP  
UBXN1 TRAF2  
PLUNC UBQLN4  
SREBF2SNAP23  
AIP STIP1  
RGS2 IBTK  
CBX7 CBX8  
RBX1 FBXO18  
CREB1 PDX1  
IPO7 IKBKG  
UBC MKRN1  
MAD2L1 TSC22D4  
UBC TBK1  
RRAS2 RASIP1  
GNAO1 HRH4  
RNF130 SCN2A  
EIF4E EMX2  
CCT8 PPP2R2C  
APOE LRP1  
SMAD2 CREBBP  
CEP63 CAMKK2  
RBM10 FAM124A  
CCNE1 CDKN1B  
WNK1 FHOD1  
TNNT1 ZMYND19  
TSG101 SH2D3A  
MAPK3 CPXM1  
SCNN1A RPS27A  
MECP2 RCOR1  
PDCD6 MAPK1IP1L  
LPXN POM121  
HMOX1POR  
BBS2 EXOC7  
CEBPG GRINL1A  
AP2A2 AP2B1  
CDC6 SNX33  
CENPF TSC22D1  
GRB2 SH3D19

BMPR1B BMP4  
BMPR1B BMP2  
PBXIP1 MDFI  
SSSCA1HLA-B  
NUTF2 FTSJ1  
SNAP23ABI2  
ITGA5 GIPC1  
TLE1 HES6  
GNMT PLEKHF2  
NFKB2 RUVBL1  
PHOX2A PRKACA  
RPS27AABTB2  
XRCC6 KAT2A  
XRCC6 KAT2B  
SOCS3 BCL10  
FAM173A LUC7L  
PABPC1 YWHAG  
RAF1 CNKSR2  
ACTN4 ACTC1  
MCM4 ORC3  
DYNLL2 EWSR1  
SMAD4 ZNF521  
DLG4 SLC25A16  
TMEM139 SMURF2  
ZNF24 APLP1  
RAB5A RABAC1  
FXR1 CYFIP1  
PABPC1 GIGYF2  
SHC1 CLTC  
EFNA1 KAT5  
ESD DDA1  
TCF4 ID3  
PDCD6IP TSG101  
NFKB1 DNAJA3  
ORC3 CD244  
RPS14 TRIP6  
CASK CASKIN1  
ATXN1 ZHX3  
RNF135 RARRES3  
MAPK8 BMF

ERBB2 TNS3  
SFN MST1R  
IRF3 SMURF2  
YWHAG HDAC7  
ERBB2 PTK2B  
TBC1D25 FEZ2  
STK25 STK24  
CHEK2 MSH2  
DNMT1 STAT3  
ID3 IKBKG  
MYOD1HIST1H3J  
MAP3K8 SPTBN1  
FXVD3 FBXL12  
ORC2 DBF4  
RLN2 RXFP1  
HLA-A COPB1  
SMAD2 HDAC2  
UBA1 BTRC  
CENPA H3F3B  
EIF4G1 TH1L  
NR1H2 HDAC4  
PTGES3SMYD2  
CBL TRAF6  
POLR2B GTF2F1  
ANAPC11 ANAPC10  
NT5C2 NOC4L  
TBP BRD2  
YWHAG TRA2A  
FN1 ITGA8  
PDPK1 MTOR  
PPP1CAAURKB  
HLA-A HYOU1  
NR3C1 KDM5A  
JUP DSG3  
NFATC2 CREBBP  
MSH4 RPA1  
ETS1 CAMK2B  
ACTR2 ACTR3B  
PRKCG OCLN  
HSD17B4 UBA5

SMAD2 ESR2  
CTNNB1 MAGI1  
SMAD2 RSF1  
HIST1H4I TAF1B  
SET NUP88  
CSK LILRB1  
SMAD7 KDM2A  
APOB MTPP  
RTN4IP1 RTN4R  
SRSF11 RNPS1  
STAT3 IRAK1  
USP25 MYO6  
SUV39H2 CGGBP1  
NFKB2 BTRC  
SMARCB1 NR0B2  
TNKS1BP1 TNKS2  
ZFPM2 UBQLN4  
NFYB SREBF2  
ATXN1 RBPMS  
BRX1 LYAR  
CD3E CD3G  
BAG4 HSP90AA1  
ADRBK1 OPRD1  
TSG101 PIGQ  
SH2B2 FYN  
CD4 EPS15  
PRKACA PPP1R9B  
STAT3 RAC1  
PDE5A ITPR1  
PRKAR2A RYR2  
KRT18 CASP7  
NCOA1 CARM1  
TNFRSF10B TIMM50  
VAV1 ZNF655  
PABPC1 ITCH  
RASSF3SAV1  
PIP5K1C BTK  
PRKCA PTGIR  
SET THAP7  
CASP7 GOLGA3

SUMO2 TRIM26  
F13A1 SERPINF2  
IL6ST PIK3CG  
RFC5 MED31  
ACTR5 RUVBL2  
RAPGEF3 RAP2A  
GRB2 KHDRBS1  
CD40 ERP44  
HSPA9 FBXO33  
TAF5 TAF2  
PSMA3 ATN1  
YWHAQ NFATC4  
TCF3 LMX1A  
PSTPIP1 RPL36  
SNRPD2 DDX20  
PDE6D RND1  
PLS3 VHL  
CDC42 LAMB3  
VHL CUL2  
PIGC ZHX1  
COL4A4 FBLN2  
ARR3 ITCH  
CAMTA2 NKX2-5  
PARN UPF2  
NFYA CDK2  
RPS27A GRB2  
SMG1 TELO2  
HSPA9 MAP3K3  
MCM4 GSTK1  
MSH2 RPA4  
MITF FOS  
THRA ITGB3BP  
ATXN1 WNK1  
GABBR2 GABBR1  
PDPK1 ILK  
RAB6A PMM1  
PSMC2 ATG4C  
PRKCB IFNAR2  
CCL7 AES  
HSPA1L YWHAZ



ENC1 RBX1  
DLG4 ERBB4  
YWHAG PRPF4B  
TRAF3 TNFRSF19  
CYP27B1 ZBTB16  
RAD23A ADRM1  
CBX5 PRR14  
DLG4 DLGAP4  
USP6 ANKRD44  
CYP27B1 PPP2CA  
EWSR1 C19ORF57  
SNAPIN DDR1  
CRX PDC  
OTUD4 CDK5RAP3  
DLEU1 EEF1A1  
BCL2A1 BMF  
ATAT1 SMARCB1  
NPM1 NUMA1  
SKP1 CUL1  
NPM1 PTBP1  
SMAD4 PBK  
NRP1 PGF  
NRP1 VEGFB  
NDUFA2 LBP  
RGS2 LRFN1  
PRKRA TIRAP  
CASP1 PAK1  
ETS1 SRSF11  
HCK SOS1  
NFKB1 GRB14  
NFKB2 RUVBL2  
PTPRN MADD  
HSPB7 HSPB8  
TGFB2 DAXX  
NRAP TLN1  
VCAN SELL  
TP53 UBC  
MPDZ CSPG4  
CD9 CD38  
UBE2D2 ZNRF2

PPIG PNN  
WDR3 USP43  
SMAD4 ARL5B  
CHGA SCG3  
CCNB1 PLK1  
POLR2C SUPT6H  
ABL1 DDB1  
SMC2 CBX5  
POU2F2TXNRD1  
MRAP MRAP2  
SERPINA3 CTRL  
NPHS1 NCK1  
RXRA LGALS12  
EEF1A1PTPRCAP  
PIAS1 TRIM27  
UBE2B MED31  
SLPI CTSL1  
VWF GP1BA  
SYK HDAC1  
TCEAL1 USP7  
BIN1 RIN3  
TNFRSF13B TRAF6  
CD81 IGSF8  
YY1 NOTCH1  
PIAS1 ZMIZ2  
PFDN1 IKBKE  
ARRB1 PRPF4B  
JAK2 AGTR1  
ARR3 ZNF496  
ATG12 EPRS  
IL11 MAGEA11  
RET CBL  
RUNX1 CBFβ  
EIF3F CDK19  
MCC PDCD10  
MAPK12 DLG2  
NCK2 FXR2  
FLNA OTUD1  
ZEB2 HDAC2  
TEK ANGPT4

ATF2 IRF2BP1  
GP1BA YWHAG  
MCC EIF4G1  
EIF1B RPL35  
CHMP6 METTL9  
APC AGFG1  
CD86 RPS27A  
RPL35 CDC42BPB  
APC HNRNPF  
FOXO3 YWHAZ  
NCOA1 PPARGC1A  
CCL21 CCBP2  
EFNB2 GRM1  
PHB PHB2  
YWHAB TJP2  
ANKRD17 APC  
MSTN ACVR2B  
APC AXIN2  
VAV1 GRB2  
ARL2 PPP2R5D  
SUPT7LSERTAD1  
HDAC3 AES  
CDH2 PTPN22  
PTP4A3 AHSA1  
HAP1 IMMT  
TXN EPB41  
ZNF764 KRTAP4-12  
RNPS1 C14ORF102  
MLH1 ATAD3A  
ARRB1 TCOF1  
HMOX1UFD1L  
TIRAP IL1RL1  
MYBL1 NLK  
RANGAP1 MEPCE  
GRAP2 KIT  
NCOR1 NR1D2  
PXN GIT1  
LYN BCAR1  
RAB35 ALK  
MCC CNBP

CASP8 DEDD2  
SERPINE1 LRP2  
VCL NRAP  
PGD PRKAB1  
THRA MED21  
CREBBP RBCK1  
GTF2I MEPCE  
UBC POLL  
SMARCD3 STARD13  
CCNE1 RPS27A  
NASP HIST1H4I  
DLG1 GPR125  
BCL2 TMBIM6  
ITIH2 ATP5C1  
HNRNPK SREK1  
RELA HSPA1B  
YY1 HOXA11  
MED14 STAT2  
HADHA DDA1  
UBC ZRANB1  
NCK2 CPSF6  
NCK2 DDR1  
RGS10 ARF6  
ARHGAP5 PTK2B  
TSC1 TBC1D7  
NRIP1 CTBP2  
TOP2A EIF2C2  
U2AF2 ATXN1  
PTN SNCAIP  
ATF1 CSNK2A2  
SMAD2 PPP1R9B  
TNKS TNKS1BP1  
HIST1H2AE ERCC6  
UBE2I SPECC1L  
SNCA RPS27A  
SLC8A1CAV3  
ETS1 CDC5L  
GRAP2 CD28  
MSH3 BARD1  
THRA TDG

AP2B1 SMAD4  
DDX3X XPO1  
MYC CDCA7L  
YWHAG MPHOSPH9  
SNRNP200 MYC  
KNTC1 ZWILCH  
HGS NMI  
HOXD4 ZBTB32  
EFNB1 LGALS12  
UBC MED15  
KIAA1009 LXN  
KIAA1967 ZNF335  
SOCS3 CSF3R  
DACH1 NAGK  
ACTA1 CTNBL1  
SRI CALCOCO2  
CHD3 C4ORF17  
NCK1 ARHGAP32  
TSHR CANX  
SUZ12 EZH2  
POLR2C GTF2F1  
CHEK1 NEK9  
RNF40 STX1A  
RBMX SRRM1  
PRKAR2A AKAP1  
SLC1A5GSTK1  
MYH10 TRPM6  
ZBTB7A RB1  
CACNA1H GNG2  
SETDB1 SNIP1  
SLC25A4 PPIF  
DEAF1 INTS1  
NCK2 NTRK2  
FST FSTL1  
PAF1 SUPT16H  
JAK2 HES1  
CNBP TRIM56  
ETS1 PFDN5  
GCM1 FBXW2  
MLH1 PARVA

S100A12 AGER  
VHL RBX1  
KIF5C KLC2  
HAUS3 HAUS6  
PRKACA RANBP9  
PRKCB HABP4  
YWHAG PIK3R4  
TCEAL1 TIPIN  
IRS4 PTPN6  
YKT6 BET1L  
HK1 MAX  
NEFM NEFH  
PPP4C SRRM2  
DHX9 ILF3  
GH1 MAPRE1  
ACTN2 KAT2B  
WWP2 PDLIM7  
C7ORF64 SMPD3  
TBP TRAM2  
SAP30 SMARCA2  
RFC3 PHLDA3  
CD63 PI4K2A  
MCC SOAT2  
HLA-DQB2 CD74  
OTUD4 KRT33B  
TRDMT1 UTP14A  
TRAF1 MAP3K14  
SPOP MYD88  
SH2D1A CDC42  
EEF1D EEF1A2  
SNRPF WDR77  
RELB CBX3  
RAB6A DCTN1  
CTLA4 STAT5A  
TRAF7 UBE2D4  
ATP5B TRIM63  
VHL HIST1H2BG  
YWHAZ PRKCE  
CCND1 RFC1  
CAPNS1 CAST

WNK1 PIAS3  
TAF5 TAF7  
TAF5 TAF11  
FAM124A NKAP  
HGS BSG  
TAF5 TAF13  
NET1 MAGI1  
EPHB6 HDHD2  
TNFAIP3 TAX1BP1  
BMP4 BMPER  
PSMB9 PSMB8  
CRYABBMPR2  
PTN CDH10  
TERF1 DCLRE1B  
CCNE1 RRN3  
CBX4 RING1  
LRP1 ANAPC10  
HSPA4 DDIT4  
PRKACA CAMKK2  
HNRNPC SRRM2  
ILK CASP8  
PPP1R15A PPP1CC  
SLC8A1ANK2  
SART1 SUMO3  
CREB1 CARM1  
CDK6 CNOT7  
VHL RAPIA  
TRAF5 LTBR  
HDAC4 CDK5  
SSTR5 GOPC  
TNFRSF14 SRPRB  
LMNA SYNE1  
NAP1L1 EP300  
GDF5 ACVR1  
SMARCB1 SS18  
TMEM173 TBK1  
TIFA TRAF2  
ATG16L2 MAP1LC3B  
SMURF1 CXXC1  
RNF11 IKBKG

NCOR1 RARG  
RB1 PURA  
YWHAQ PNKP  
HABP4 DAXX  
CHMP6 RAB17  
NUP62 NUTF2  
PAK2 RDX  
DLGAP1 SRC  
CCT8 TRAF3IP3  
EDF1 ATF2  
GUCY1A2 HSPA4  
PDGFA DUSP3  
RASSF3RASSF4  
MLLT4 PVRL1  
CD2BP2 RPF1  
ARL4D NDRG1  
MMP2 LCN2  
CDH1 GSK3B  
GTF2A1 GTF2A2  
FYN PLCG1  
EIF2S2 CCDC90B  
SCD MYC  
PIK3R1 IL6ST  
EFCAB6 PARK7  
PIGF PIGO  
HGS HNRPDL  
COIL PSME3  
ADA ADORA1  
NEFH STXBP1  
PML PAXIP1  
MCM4 DBF4  
TAF6 SETD7  
DTX3L UBE2E2  
RNF11 EPN1  
DCP2 EIF2C2  
RPS27A SRR  
STAU1 RPL28  
CCND1 CTNNB1  
ZMYND11 SMAD2  
CUX1 BIN1



RHPN2 ATG5  
AR PTEN  
SYT1 GNB2L1  
CDC42 PAK7  
HSP90AB1 PRKCH  
HOXA13 MEIS3  
TOP2A DHX9  
RELA APBA2  
EIF1B CDKN2A  
IRAK2 IL1R1  
DVL3 ZNF512B  
PPP1R2 LMTK2  
CSF1R SOS1  
UTP20 IKBKG  
PML SUMO2  
SMAD3 DAB2  
PLAU ST14  
NPHP1 FLNA  
CCNE1 E2F4  
NR1H2 UBE2I  
PTN SPIN1  
CSNK2A2 RGS19  
MELK BCL2L14  
FOS EP300  
STAT3 KAT5  
RASA1 DOK4  
RRAS PLCG1  
ARRB2 AP2B1  
SMAD2 ERBB2IP  
STAT5B CXCR4  
POLD2 TSG101  
MLH1 NDFIP2  
HDAC1 EID2B  
MAGI2 RAPGEF2  
VHL DGKZ  
GADD45B PCNA  
NPDC1 MDFI  
ADAM15 ARHGEF7  
DCP2 EIF2C1  
SMAD2 RANBP9

PTPRC IFNAR1  
EFEMP2 CATSPER1  
DST CELSR3  
CLTB CALM2  
CCNE1 CABLES1  
PDHX PDK2  
DOK2 DOK1  
RB1 CDK6  
MPG MACF1  
USHBP1 SERTAD3  
RAB2A GOLGA2  
BLM WRN  
UPK1B UPK3B  
SUPT6H WDR48  
CTTNBP2NL STK24  
WNK1 NUMBL  
GAPDH GRM1  
MAGEA11 ENOX2  
HTT CRMP1  
KDM1A TAL1  
CUL4B POC1B  
RGS2 SCN5A  
STAT3 SMARCA4  
PSMB4 SLX4  
PHF15 ING4  
KIF23 RACGAP1  
ZMYND11 TAB1  
BCAR1 TNS3  
JUP TCF7L2  
SMAD2 ANP32B  
SGK1 PA2G4  
GRIA2 CACNG2  
PROC GGCX  
XRCC6 TCF4  
DAPK3 CDKN1A  
CUTC PIM2  
NFKB1 STAT3  
CSNK1D ARFGAP1  
C2ORF18 MS4A7  
CRTC2 RFWD2

RNF220 UBE2E2  
GZMA NCL  
SQSTM1 NTRK2  
CLTC STAM  
PARK2 TUBA4A  
GRIN2D CTNNB1  
VHL HDAC1  
TSC22D1 SLC25A22  
ATN1 ECM1  
SLC25A6 TMEM62  
CAD MAP3K1  
TRAF2 STUB1  
CCNB1 KAT5  
ACTG1 RIPK3  
SIAH2 CACYBP  
ATE1 RAE1  
SERPINA3 ERBB2  
TP53 ARL3  
USHBP1 C1ORF216  
MAP3K5 ALK  
MSX1 CREBBP  
ITGB3BP GIT1  
PDE6D RPGR  
TRIO PTPRF  
GNAO1 S1PR5  
PPP2R1A KIAA1524  
LCK ABI1  
RGS2 COPB1  
RGS20 STMN2  
MAX MXD3  
SMAD2 MED15  
BCAR3 TMED10  
ERBB2 CISH  
PARK2 RAC1  
IRS1 YWHAZ  
PLK1 PSMB7  
BTF3P11 TNFSF11  
GTF2E1 SND1  
NAA38 COL23A1  
LALBA GRB2

KLK3 ARAF  
NDUFS1 HLA-B  
TRAF2 EDAR  
CRK RAPGEF1  
PRKACA NFKB1  
GNB2L1 PRKCD  
RAP1GDS1 MBIP  
TNFAIP3 YWHAB  
TRIM54 TRIM55  
APBB1IP PACSIN2  
ERBB2 ANKS1A  
CHMP2A VPS24  
RFXAP SMARCA4  
C6ORF165 UBXN11  
HTT HAP1  
IPO8 EIF2C1  
STAT1 SUMO4  
TACC2 AURKC  
CTNNB1 CACYBP  
APRT FTSJ1  
RNF130 UBE2D4  
YWHAG NCBP1  
HSPA4 PPP5C  
VIM SETDB1  
CASK SDC3  
ERCC3 GCN1L1  
SOX8 TCF12  
MAFG NFE2L1  
PTPRF GIT1  
HLA-B VPS35  
APOE RNF32  
MAP3K7 NUDT21  
TLX1 PPP2CA  
RABEP1 GGA3  
C5 C8B  
WNK1 CABIN1  
BUB1B UBC  
SMAD4 C16ORF57  
NASP ULK2  
HDAC3 ZBTB33

ID2 SIN3A  
TSPAN6 INSL6  
EPPK1 GRB2  
AAMP TH1L  
VHL PIN1  
TPST1 CCR8  
PSMA3 PSMD6  
GABARAPL2 PFKP  
NOTCH1 ITCH  
GSN VASP  
IGFBP3 PAPPA2  
PAX7 WDR5  
YWHAG DYRK1A  
ACTG1 TRAF6  
YWHAG TP53BP2  
KRT5 TCHP  
ESR1 CSNK2B  
ZEB2 SMAD1  
ZEB2 SMAD2  
AR NR0B2  
MPP3 SF3B3  
MTA1 BCL11B  
GABARAP FNIP1  
NFKB1 APLP2  
XRCC1 APTX  
TP53 BTK  
CDC42 SNRNP40  
TOP3B SNRPB  
TUBA4A GRM7  
SLX4 TSPYL1  
IPO8 EIF2C2  
SMAD7 STRAP  
PCNA FANCE  
MCC CCNA1  
HOXC11 MUM1  
LRP1 MMP17  
SPARC VEGFA  
TPM2 S100A2  
SEC11A TRAF6  
EZR MDM2

SETDB1 CDYL  
PRKCA SLC1A1  
HOXB6 TCEAL1  
HCK CHST15  
GH1 AK2  
PCNA CLSPN  
XRCC6 BARD1  
PRDX6 SUMO4  
RNF11 AUP1  
NAP1L5 MAGEH1  
ATN1 EFCAB4B  
RNPS1 WDR26  
TRAF3IP1 FGFR1OP2  
EPM2A EPM2AIP1  
BLMH USP53  
SLPI CTSB  
PDHA1 PRKAB1  
ZFP36 YWHAG  
GNA13 ARHGEF12  
RBP1 BRMS1  
SMAD4 ECSIT  
ATMIN ATM  
JAK1 IRS1  
LRRC15 USP15  
FSHR CBX5  
PIK3C2B PIK3R1  
PSEN1 FBXW7  
FLII LRRFIP1  
ITGAM ICAM2  
PQBP1 CLTB  
NFKB1 PCBD1  
IGFBP3 IGFALS  
MCM2 CPSF1  
PTP4A3 SMC2  
C6ORF165 MDFI  
C9 CLU  
TRAF3 TNFRSF12A  
ARHGAP8 CTTN  
RHOA ARHGAP26  
MED12 MED13

CFTR LPAR2  
PCMT1 HLA-B  
MAP3K5 MACF1  
SYNJ1 SORBS2  
PRPF40A YLPM1  
KLF11 HDAC1  
HSD17B4 RELB  
PCBD1 ZNF567  
CHAF1A ZNF408  
S100P S100Z  
SLC6A3STX1A  
MAPK1 PPP1CA  
FGF2 HSPG2  
YWHAG CDC5L  
ARHGDI1 EIF2B1  
APC RBM8A  
CD40 POLR2H  
ANKS4B USH1C  
USP49 MED8  
ARL4D CNPY4  
NR3C1 COPS6  
CHTF18DSCC1  
GNAZ RGS19  
IREB2 RBCK1  
PLCG1 SHB  
RUNX2 HDAC5  
ATXN1 RAPGEF4  
CTNND1 GSK3B  
DNM2 ITSN1  
PRDX4 SUMO4  
CHD3 ZHX1  
PRNP ZFYVE28  
UBE2D2 OTUB1  
SOAT1 TNIK  
PITX2 LEF1  
NRIP1 TEX11  
TOLLIP ODAM  
SLC38A1 ITGB1BP3  
UBE2D2 RMND5B  
BICD2 SLC25A10

TNFRSF1B SEC61A1  
USHBP1 TUBGCP4  
HSPA5 MAP3K1  
RPS6KA4 ATF1  
ITGAE CHFR  
SRP72 CASP6  
TRIM31UBE2D4  
RQCD1 CNOT6L  
DVL2 SORBS3  
TRIP13 USP32  
BRD4 HIST1H4I  
SSBP3 ANKRD5  
UBE2L3 RNF144B  
IPO13 ALX1  
RAB6A VHL  
NCOA4 ATXN2  
TP73 PIAS1  
CCNA2 HIRA  
SRPK2 SRSF6  
SRPK2 SRSF5  
CYFIP2 WASF2  
JAK3 PTK2B  
EIF2AK2 PPP1CA  
CLTC CLINT1  
UBR5 TOPBP1  
APEX1 TRAF6  
PFKL KRTAP4-12  
MCC MARS  
PCM1 TTC8  
RIBC2 NRBP1  
ALK MAPK8IP3  
HMOX1RPS27A  
MYC RPS27A  
THRA CUL1  
ERBB2 PIK3R3  
HAT1 SMAD7  
TP53 SPSB1  
PAK1 ABI3  
PDLIM1 ACTN1  
NCOA1 MAPK6



SND1 USP22  
EPHA2 GRB2  
PSMD7 MAX  
MYST2 PACSIN1  
C5AR1 RPS19  
MYC RPS27A  
EGFR NCK1  
INSL6 KIAA1377  
VHL DCTPP1  
NCOA1 HIF1A  
PRRC2B RERE  
DAZAP2 EXD3  
SSSCA1FXR2  
BAG2 NFKB2  
IRS1 PIK3R3  
GMPS USP7  
F2RL1 GPRASP1  
NFKB1 TAB2  
PRDM1 TLE2  
GSK3A MCL1  
PRDM1 TLE1  
BCAP31 VAMP2  
HLA-DOA HLA-DMA  
EZR MCC  
ACTG1 IKBKG  
CDK8 MED17  
PRKAR2A WASF1  
RAD23A TRAF2  
CHD3 IKZF3  
UBE2D1 RNF43  
PHF10 UTP14A  
TCF21 APLP1  
SRC ARR3  
BRCA1 FANCD2  
TNNT1 PRKG1  
USP49 STAMBPL1  
SMAD2 SMARCC1  
RPS6KA3 GPRIN1  
POLR2C EEF1A1  
TBXA2R GNA12

STAT1 TSC1  
UBE2K DZIP3  
EIF4EBP1 CHTF8  
GIPC1 LRP1  
CRK TP53BP2  
RARA UBE3A  
FOS ATP5I  
IL4R PTPN11  
KRTAP4-12 ILF3  
FSTL1 TTN  
VCAM1ITGAD  
PPP4C CCDC6  
PDXDC1 BCAP29  
MAGEB2 RPS19  
PSTPIP1 BZW2  
C11ORF49 UBQLN4  
MTOR RPS6KA1  
HCK IL6ST  
SMAD3 FOXO4  
FRYL HOMER3  
USP1 FANCD2  
SMAD2 COPS5  
ARRB2 PPM1A  
DLG3 NLGN3  
CASP8 HDAC7  
PINX1 WWC3  
DCTN1 GSTK1  
NXPH3 CRK  
NAP1L5 KIAA1377  
VAMP3 VTI1A  
PRPH2 CNGB1  
ZBTB16GNE  
MAP2K4 MAP4K2  
ADRM1UBQLN2  
FAM3A OGDH  
GH1 APRT  
MCM4 SUPT16H  
CLN3 SLC25A10  
MAP2K4 MAP3K12  
FZD7 DLG1

SFPQ TOPORS  
SIP1 SRSF2  
GH1 PCBP1  
CCT4 ACTA1  
NRIP1 HDAC9  
CUL4B DCAF11  
GTF2A1 CSNK2A1  
ORAI1 ORAI3  
PRKAR1A GRB2  
SMAD2 RIT1  
UBE2D2 RNF185  
YWHAZ DYNC1H1  
PRKCG DAB2  
AIFM1 BRF2  
PPP2R1A PPP2CA  
SMARCC1 SMARCC2  
FXR1 KIAA1377  
MCM4 EMD  
TSHR PIK3R1  
GTPBP3 PARP11  
PRSS1 GRB2  
MEOX1 SOX10  
IL4R GNB2L1  
ARIH2 EEF1A1  
GIPC1 ACTN1  
PHLPP1 BTRC  
EPHX2 NIPSNAP3A  
TRIM24 HSPA1B  
TNFRSF13B TNFSF13B  
MCL1 MEF2D  
POLE TOPBP1  
BID CSNK2B  
NUP85 DYNC1LI1  
NUP153 MAPK14  
ABL1 YWHAZ  
CLSPN TIMELESS  
PPP1CC BRCA1  
OMG RTN4R  
TUBB4 MAP3K3  
PIAS2 MBD1

WNK1 WNK2  
SNRNP200 CD2BP2  
CST7 CTSC  
MRPS9 DDX56  
CASP4 IL18  
WNK1 PKP3  
CCDC113 HAP1  
CHEK2 ASF1A  
VHL FKBP1A  
TNFSF11 ADAM17  
MMP2 CCL7  
ACTN4 WNK1  
AGPS GNPAT  
ARX TRAF6  
MSL3 MSL2  
CAPNS1 RASA1  
GXYLT1 ATG5  
APBB1 PTBP1  
ITSN1 DISC1  
SLPI PRSS2  
NR1H3 NCOA3  
DNAJB6 SIRT2  
ITGAV ITGB6  
HAX1 HCLS1  
STAM2 CBX5  
STMN2 VOPPI  
HIF1A HDAC5  
PPM1G BAP1  
PIK3R1 TIRAP  
CDT1 TP63  
MXI1 SMC3  
TRAF3IP1 TRAF6  
ABLIM1 WNK1  
APC2 MAPRE1  
LRPAP1 EIF4EBP1  
TP53 CSNK1D  
RPS6KA2 MAGI1  
PSTPIP1 CD2AP  
PSTPIP1 FDFT1  
PLAU PLAUR

TRPC4AP IKBKG  
RXRA NCOR2  
PPP1R15A MLL  
SUMO3 HIF1A  
CYP2E1POR  
MCC TPP2  
RB1 PRMT2  
ZBTB8B SMURF1  
CEBPE ZNF384  
GTF2F2 RPL27A  
YWHAH PARD6B  
YWHAH PARD6G  
RBX1 RFWD2  
DYRK3 PRNP  
HPCAL1 SLC34A1  
TP53 CSNK1A1  
SRC HOXC8  
TBP NFYB  
PGD TRAF6  
BMP4 BMPR1A  
NCK1 CBLB  
PDPK1 G3BP1  
FGF1 SYT1  
APOE MAST1  
NUP153NXF1  
BET1 USHBP1  
BIN1 DNMT2  
COL1A1 NID1  
PHB DPP6  
EMD HDAC1  
KCNA3 DLG1  
FAM101A FBXW7  
APP APPBP2  
MCC SEC63  
EPAS1 ARNTL2  
HCK BCAR1  
SERPINB9 TUBB2A  
EFNA1 EPHA3  
EFNA1 EPHA8  
TP53 TADA1

FGFR3 FGF23  
GAPDH CAMK2B  
MYO1BPTP4A3  
CDK9 RELA  
APP SNCA  
HSP90B1 RXRB  
HOXA13 SMAD5  
EIF1B PFDN4  
CD1D CANX  
PLD2 DPYSL2  
CCDC85B CCDC112  
MAGEA11 OTUB2  
TUBA4A GPHN  
SOS2 FAM82B  
SOCS6 INSR  
TNFSF9TRAF2  
NCOA2 HIF1A  
DVL3 SNX22  
OTUD4 RUNX1T1  
UBE2V2 MOBKL3  
PHF12 SIN3A  
TUBA1C MAP3K3  
CLSTN1 PRNP  
EFNA1 EPHA2  
RNF26 UBE2D4  
CCAR1 CASP10  
CDH5 SMG1  
SAP18 IKZF1  
HSPA4 HSPBP1  
HCK C2ORF44  
UBE2E1 POLM  
RELA FAF1  
EIF1AXTRAF6  
DIAPH3HDAC6  
GTF2F2NAP1L1  
TEC GNA12  
KALRN PAK1  
EEF1D VHL  
UBE2D2 ZNFX1  
HIP1R HTT

EIF4E PML  
SLC35E1 MCOLN1  
GAK USO1  
CDK1 UBA1  
YWHAG SHROOM2  
MSX1 SUMO2  
CAD RIPK1  
CCNA2 BRCA1  
MDM2 CDKN2A  
NCK1 PAK1  
NDEL1 DISC1  
HIST1H4I MYST1  
SNRPD3 CDC5L  
TRIM27PIAS3  
LYN MS4A2  
CYP27B1 POU1F1  
C10RF65 C19ORF50  
PEX10 PEX5  
HAP1 NIPSNAP3A  
TRIM32UBE2U  
PPM1B ANXA2  
PRKCZ HABP4  
TGFB1 GNA13  
MKNK1ACBD3  
GRAP2 GAB1  
DLGAP5 BTRC  
THBS1 MMP2  
RER1 IMMT  
PFKL RELB  
RPS6KB1 STK11  
COPS5 COPS7B  
EWSR1 SLC22A24  
ZNF24 KBTBD7  
COPE ARF1P1  
KDR SHC2  
PRSS23 NCAPD3  
SEC16ASEC23A  
WDR6 CDC42EP4  
MAP2K1 RPS6KA2  
SKIV2L2 MPHOSPH6

USP7 ZNF423  
MRPS10 PHLDA3  
RELA ING4  
C6ORF165 RNF138  
SUMO1 LRCH1  
PDE4D AKAP6  
NTRK1 FRS2  
TP53 LAMA4  
NCK1 PAK2  
MLPH MYO5A  
THBS1 ELANE  
DLEU1 TUBB2C  
CBX5 EHMT2  
EIF2S1 EIF1AX  
SMAD4 EWSR1  
HCLS1 SYK  
CEBPB EHMT2  
OXT OXTR  
RXRA NR2E3  
PPARG SERPINH1  
TUBB4 HEXDC  
SDC1 PTN  
CTR9 LEO1  
FASLG FADD  
COL4A1 BMP3  
ARFIP2 ITGB3BP  
ERBB2 SHC3  
GOSR1 SCFD1  
CUL7 MEGF10  
DIXDC1 NDEL1  
CENPA SRRT  
ERBB2 GRB7  
IRAK2 TRAF6  
STMN2 TRPC5  
BMP7 ACVR2A  
NCK1 CHAF1A  
ERBB3 SHC1  
ACTG1 FHOD1  
SNRPD3 MEPCE  
AR TGIF1



PIN1 KIF20B  
SPTAN1 SLC9A2  
TUBA4A PFDN4  
UBE2D3 TRIM25  
INPPL1 SORBS3  
TRIM63UBE2J1  
FOS GTF2E2  
TCEANC C1ORF190  
DIXDC1 MAP3K4  
KPNA1 RAG2  
ZFP64 C14ORF1  
RNF10 UBE2Q2  
RCN2 TRADD  
HLA-C TUFM  
MYC RPL11  
HCK KHDRBS1  
SIN3A ZBTB4  
PFN2 RAP1GAP  
CHGB FGFR3  
GNAZ RGS7  
MRPS6 SRRM2  
ABCB1 CAV1  
POU2F2POU2AF1  
EIF1B MXRA5  
TP53 NFYB  
DAND5 S1PR1  
ZSCAN16 ZSCAN30  
UBC NEDD4L  
NUP62 RAE1  
DAND5 ARHGAP21  
RPS16 NDRG1  
MAX AKAP13  
SUV39H1 MECP2  
REV3L MAD2L2  
TCF4 ID2  
POLD2 KCTD13  
HNRNPK SRSF3  
HDAC1 HNRNPD  
KAT5 GEMIN7  
NAA38 FERMT3

NANOS3 PI4K2A  
RUNX1 NR4A2  
APLP1 CNTN4  
AR NCOA2  
GATA1 HEY1  
ANAPC11 ANAPC2  
MAP3K7 HSPA5  
PPP2CATRIP13  
HSPA9 COBRA1  
HSPA5 TSHR  
KCNK1 SENP1  
DNAJC3 EIF2AK3  
PNRC1 HNF4G  
GABARAPL2 TTBK1  
ADAM9SNX9  
ERBB2 SYK  
MAPK1 IRS1  
RECQL5 POLR2B  
TNF MRPS33  
SAP30 UBASH3B  
KLKB1 TFPI2  
FXR2 CYFIP1  
ARL1 PHLDA3  
KLK1 SERPINA4  
CTNNB1 DVL3  
ACTA2 SNTA1  
GRM3 PICK1  
TRAF2 CHMP2B  
ARAF RABGGTB  
NPM1 OTUB1  
NDUFV1 EWSR1  
APP COL4A6  
APC FHOD1  
SNAP25ITSN1  
FXR2 TRAF2  
REST HDAC1  
ACTA1 TTN  
CBL PTPN22  
CDH1 VEZT  
DPM2 PIGC

ELAVL3 EWSR1  
DST CELSR3  
EZR IKBKE  
TRAF7 PIAS4  
PLCG1 MAP4  
PIK3C2A STAMBP  
RIOK3 SSR4  
NRP2 VEGFA  
MEPCE CCDC87  
SUMO2 AHNAK  
HMGA1RNF4  
KRT18 CASP6  
DYNLL2 MYO5A  
PLAU IGF2R  
HDAC1 CHFR  
TAL1 ELSPBP1  
CTSG SDC1  
CD44 PKN1  
BRCA1 NUP153  
HK2 UBQLN4  
TK2 CRMP1  
DENR MARCH5  
CCNB1 ITPR1  
TNFRSF10B BID  
STAU1 IQGAP1  
HNRNPA1 PABPC1  
CD40 JAK3  
TNF RALBP1  
RRAS PPP2CA  
THRA COPS2  
SKI SIX1  
ESR1 TP53  
ITGB1 RAB8B  
C14ORF1 LSM2  
ISG15 RPF1  
SLC15A1 PDZD3  
CDK1 KHDRBS1  
CDK2 NAA25  
FSTL1 DIP2A  
PPP2R1A CCNG1

HRAS RASSF2  
PRKCZ ECT2  
MAFF GTF2A1L  
PTPRB ALK  
STAT3 LEPR  
DDX5 SRRM2  
LYN KIT  
CDKN2A AHNAK  
CBX3 LBR  
GTF2I GSTK1  
SMARCC2 SMARCE1  
C1ORF65 KRTAP4-12  
RAB3B CHM  
MAP3K1 TUBA1A  
GSK3B EWSR1  
ZRANB2 EMD  
RPA3 ACTB  
PCNA MSH6  
ACD POT1  
MSN PLEC  
CTNNB1 TCF7L1  
DLG4 NLGN2  
FOXO1 SIRT1  
CRY1 KRTAP4-12  
PRAF2 CCR5  
TBP HNRNPK  
JAK2 PTK2B  
ESR1 ERBB2  
TADA3 TP53  
HLA-DRA HLA-DMA  
C12ORF45 RUVBL2  
HLA-DRA HLA-DMB  
MYB ADAM22  
RERE ZMYND8  
IPO5 GABARAP  
KCNQ2 KCNQ1  
RBMX FXR2  
PSEN1 GCDH  
TRAM1 TICAM1  
PRNP APLP2

GAPDH PLD2  
GAPDH KAT5  
MAPT TUBA4A  
CTLA4 CD86  
KRT34 PLEKHB2  
XPO1 NUP153  
PCNA POLI  
XPO1 RANBP2  
C12ORF45 RUVBL1  
RPS4X NFKB2  
MDM2 PYHIN1  
HIST1H1C WDR12  
GIPC1 FZD3  
RNF144A UBE2H  
ACP1 FNBP1L  
NCOR1 HTT  
EIF4E EIF4G1  
HSPE1 INSL6  
CCND2 PCGF2  
YWHAZ EIF3A  
IPO5 PMS1  
HSPG2 ECM1  
PML CHFR  
ISG15 UBE2D3  
UBE2N BFAR  
MAX SHANK2  
NSF STX1A  
UBC RCHY1  
UBE2D2 PJA1  
RAD51 RAD51AP1  
DFFB TOP2A  
EIF2AK2 CASP7  
HSP90AA1 SRC  
DLG3 KLHDC3  
TNFRSF10A MOAP1  
SRF SRFBP1  
CAV1 PLD1  
DVL3 PRICKLE1  
BCAP31 YWHAZ  
NOTCH1 MAML1

H3F3B CARM1  
ALAS2 RABGGTB  
CHST1 SFN  
PPARD RELA  
NGFR NDNL2  
ZNF638 CCDC85B  
NUP62 DTNB  
KCNJ1 SLC9A3R2  
CTNNB1 HNF4A  
XPO1 CEBPD  
YWHAG SHKBP1  
BMPR1B BMP15  
CTTNBP2NL MOBKL3  
PLCG1 DTNBP1  
CDK4 ASPM  
NFKB1 MPP6  
RPN1 GSTK1  
MMP14 SPOCK1  
ARID1A ADNP  
PHC2 CBX8  
C19ORF57 C19ORF25  
ACTA1 PHACTR1  
RGS10 CALM2  
PIAS2 GTF2IRD1  
SUPT4H1 EWSR1  
PGM1 UBA5  
BRCA1 BRIP1  
RPS14 TSC22D1  
EIF5 CSNK2B  
KRTAP4-12 CHCHD3  
CASP8 OTUD7B  
ATXN1 YY1AP1  
PAF1 MAP3K2  
TRAF2 HSPA1B  
ITGB2 SEC23IP  
TP53 TP53INP1  
WDR33 WWOX  
SYK PXN  
ACTN4 YWHAZ  
PRKDC CDC5L

CCND1 CDKN2A  
RPS6KA1 PSD3  
DAND5 PPARG  
CHTF8 CHTF18  
POLRMT NFKB2  
SPTLC1ATG4C  
MDM2 ZNHIT6  
SMARCA5 BAZ2A  
NR3C2 ACTA1  
RALA EXOC1  
TRIM24NR3C2  
CCDC130 NINL  
SKP2 DDB1  
PRKCH OCLN  
SETDB1 MOBKL3  
IL6ST IL31RA  
SLIT2 GPC1  
EIF1B AASDHPPT  
STON2 EHD1  
DNM1 GPRIN1  
SMARCA5 BAZ1B  
MMP3 IGFBP3  
MAGEB2 RARA  
DGKA IL21  
COPE COPB2  
ITGB1 FBLN1  
SLN ATP2A1  
HLA-C PRMT1  
DEGS1 SF3B3  
NCOA2 TAF9  
NFKBIB MYO9A  
C19ORF57 EWSR1  
CNBP HNRNPUL1  
SRCAP ATG9A  
TBP POLR3F  
TP53BP1 PAXIP1  
PSMD11 PSMD7  
H3F3B CBX3  
DAND5 USP39  
C14ORF1 KLHL20

CNBP FTSJ1  
CCNA1 CDC20  
EMD CUL4A  
MAPK8 YWHAZ  
GH1 DUT  
XPO1 SNUPN  
ILK PRPSAP1  
SMAD2 KAT2A  
SMAD2 KAT2B  
OTUD4 FLNC  
MLPH RPH3A  
CCDC85B FAM13C  
GRB2 HIBCH  
TCERG1 BARD1  
ESR2 MED23  
CTNNB1 CHD8  
PAK2 TRIM28  
FRYL DISC1  
CCT5 PPP2CA  
PHGDH RHOB  
SCAMP1 SNAP25  
MTPN AKTIP  
MME CSNK2B  
PPP2CATRAAF3IP3  
INSR PTPN2  
SNAI1 SUZ12  
POLR2F MED30  
NUDT21 WWOX  
SHC1 PKD1L2  
UNC119 ASH2L  
NTRK1 SQSTM1  
LMNB1 SMARCA4  
RARA TDG  
VASP DNMBP  
GBAS NIPSNAP1  
NCK1 PDIA2  
PLK1 TP53BP1  
MCC TRMT112  
EPOR SYK  
MCM7 PINX1



NR2F1 EEF1D  
VAMP8 PNN  
CHEK2 GINS2  
GIPC1 SEMA4B  
RARA SNW1  
GNAI2 NUCB1  
PPP2R1A PPP2R2D  
IPO13 EIF1AX  
ADRM1 UCHL5  
GRIA2 LGALS12  
RB1 CASP7  
ZBED1 NIF3L1  
RB1 CASP6  
MAX HDAC5  
RB1 CASP9  
SYT1 NRXN1  
CALCOCO2 VPS72  
DSC1 PRKAB1  
SNW1 NR0B2  
A2M IFIT5  
ARIH2 UBE2L3  
PDGFA EPCAM  
WNT1 RYK  
NCK1 LCP2  
ZSCAN30 ZNF434  
PTPLB PACSIN1  
ATP5F1 VHL  
MDM2 CWC25  
PPBP CELF1  
RAB4A MAPK3  
ERC2 PPFIA1  
RAB11B MYO5B  
ESR1 SMARCD1  
OMA1 ERBB2  
TSSC1 MOBKL1B  
PDPK1 PAK1  
NUP214 DDX19B  
TSG101 HNRNPUL1  
IKZF4 IKZF3  
HRAS RASSF1

CTTNBP2 FAM40B  
TJP1 JAM3  
RPS14 SMAD2  
LRDD IKBKG  
RXRA NCOA3  
DEDD CCDC59  
SLC9A3R1 ABCC2  
SSB PRKAB1  
ZMYND11 TRAF6  
HDAC2 ZMYM2  
IKZF4 IKZF2  
SOX30 TRAF2  
APP NCSTN  
MCM4 ORC6  
NUP214G3BP2  
LPXN ITGA4  
POLR3D POLR2E  
TFPT PAWR  
MMP14 CAV1  
MCC PFDN2  
CLTC NDRG1  
DIMIT1L MAGED1  
SPTBN2 MAP3K3  
PRKCB EPB41  
TOE1 PNN  
ZNF354A HDAC4  
YWHAB IRS1  
PRNP SPARCL1  
MMP3 CCL2  
LGALS3 SHC1  
PHLPP1 USP46  
AR TRIP4  
IARS NFKB2  
AR JMJD1C  
DAB2 NECAP1  
RBL1 E2F1  
GNAO1 SCN8A  
PRPF4 PRPF8  
DLAT PDK3  
TNF BTRC

BDKRB2 AGTR1  
EIF5B ETS1  
DSC1 PKP3  
LIMK2 HIPK3  
SAP18 HDAC1  
CASP10EDA2R  
ATG7 SIRT1  
ATF2 MAPK11  
AR MED1  
TLR2 TIRAP  
SMAD3 SF3B2  
RAD17 POLE  
APP SHC3  
NCK1 AKAP6  
DCAF11 DDA1  
OS9 TRPV4  
TP53 CCT5  
KRAS BCL2  
FMR1 CYFIP2  
E2F1 CEBPE  
TUBB4 PHIP  
GFI1B FBLN5  
MED26 MED1  
SMARCA2 HDAC2  
DHX9 DDX20  
MYOD1STAT3  
DPH1 TP63  
CIITA ZXDA  
KPNA1 YWHAZ  
HAX1 TNFRSF1B  
DDB1 DCAF8  
MAP2K1 PLK3  
SNUPN KPNB1  
YWHAZ PRDX1  
TAF15 KAT2B  
PPP3CBSLC8A2  
STAU1 NCBP1  
CRYABBCL2L1  
RXRB VCP  
PAPOLA REL

RARA RXRB  
CD1D CALR  
MED22 THOC7  
NCK1 ANK2  
MAP2K1 WNK1  
DCTPP1 NIF3L1  
COPS2 CPSF1  
EIF4E SUMO1  
POLR2B RUVBL2  
LMNA TMPO  
LMNA TMPO  
TRAF3IP1 SMC4  
CRKL RAPGEF1  
CUX1 ELAC2  
ERBB2 LRIG1  
PIGC PIGQ  
MTOR TELO2  
UBE2K PIAS4  
NCOA6 ZNF335  
PRKCZ LARP6  
IL2RG STAT1  
STIM1 STIM2  
IL2RG STAT5A  
RXRB NR1H2  
DLAT PDK1  
PPIB WDR48  
DLAT PDK2  
NOL8 NIP7  
SNX3 HLA-B  
GNPTAB DISC1  
DPP4 CXCL9  
EPS15 NAGPA  
PSTPIP1 WASF2  
NEB TRIM63  
C19ORF50 EWSR1  
NPHS1 KIRREL  
RNF103 VCP  
SSB YWHAZ  
RRAS2 SMAD3  
HAP1 SRSF4

KIAA1279 ZNF670  
RPL5 MDM2  
INSR YWHAB  
EIF3E RUNDC3A  
CLPX C20ORF24  
XRCC5 DHX9  
UBC DAXX  
RARA PIN1  
DDX6 POLR1E  
NFATC2 PIN1  
RPF1 SMARCC1  
POLR1C POLR1E  
EGFR CBR1  
ACTG1 SCIN  
TRIM32ABI2  
TP53 PRKDC  
RHOQ COPB1  
ADAM12 ACTN2  
EVI5 FBXO5  
CCL2 CCR1  
TSEN54CLP1  
LSM7 MYH13  
CD82 VANGL1  
STAG1 SMC3  
MAGOH YWHAG  
SDC3 SDC1  
AP3B1 MEF2A  
ENC1 RPS27A  
TSG101 RNF126  
COIL PIAS4  
LAPTM5 HEYL  
DHX16 SRRM2  
DNAJB1 HSPA4  
TMEM22 ACAP3  
GFI1B TSPYL2  
EEF2 RAD23A  
GABARAP NBR1  
SSTR1 SST  
YWHAQ MEF2D  
PDPK1 PTPN12

PLK1 PKMYT1  
MTNR1A MTNR1B  
FCN1 ELN  
CUL4B WDR26  
LCK WAS  
HOXD12 MAFF  
MT2A GRB2  
GABARAP PI4K2A  
WNK1 FAM65B  
RBPJ CIR1  
PDHX EWSR1  
YWHAG SLC7A9  
TMSB4Y EWSR1  
BICD1 DISC1  
PSMA3 CDKN1A  
LYN LCP2  
OGT CD40  
VTA1 RABAC1  
EPB41L2 ACTA1  
PRDX5 IKBKE  
CDK1 MKI67  
CDK8 SMARCC1  
RMI1 FANCF  
HSP90AB1 SLC34A1  
APLP1 SPON1  
GP1BA FLNA  
XRCC5 POLD1  
CAPZB IKBKE  
HOXA10 PBX1  
ATXN10 MAGED1  
KIF1B EEF1A1  
TBPL1 PTC3  
PIAS2 EPAS1  
NCOA6 DPY30  
PPFIBP1 COMMD7  
UBR1 PTPRS  
STAT5B TEK  
JAK1 PIK3R1  
PEX14 ZHX1  
TRAF2 UBXN11

SMAP2 A2M  
PRKCG ARPP19  
NDRG1 CNDP2  
FOS SUMO3  
CDK1 HSPA2  
ABL1 TOPBP1  
PSTPIP1 CARS  
CLPX BTRC  
ITGA2 RABIF  
GTF2A1 TASP1  
ACTN4 TRIM3  
C19ORF50 MAP1LC3B  
GADD45G UTP14A  
HP GRB2  
NSF SCFD1  
ELAC2 ASCC2  
RANBP2 RAPGEF2  
NPM1 RPGR  
PPARG WDR5  
TGM2 ZNF512B  
CDC25A ROCK1  
CLTC NFKBIB  
YWHAZ ZNF839  
TNKS TNKS2  
NFIC ZCCHC14  
ZNF821 CCDC85B  
RAB27A KIAA1377  
MATN2COL4A3  
RPS27AUSP9X  
MTNR1A GNA13  
USP19 UNC45A  
MYC SAP130  
ZAP70 SLC6A20  
CCNT1 ATAT1  
YES1 CDH1  
RXRG NR1H2  
SUMO1 TMEM25  
SMARCA4 NFKB2  
RB1 KDM5B  
PMPCB MARK3

CRK WASF1  
AURKACDC25B  
WDR48 NHP2  
ACTL6A BCL7C  
RPS27A NFE2L2  
NRBF2 IKBKG  
YWHAZ ING1  
NFKBIA PIK3R1  
UBE2N RBCK1  
WAS PTPN22  
PHACTR2 CRK  
ATXN3 RPS27A  
SF3B1 SMAD1  
RBL1 BRF1  
PLCG2 SH3BP2  
TPI1 SETDB1  
TBC1D4 YWHAZ  
SERPINA1 PRSS2  
XRCC6 VAV1  
PTPN1 NFKBIA  
CXADREWSR1  
COL5A1 MAG  
SERPINA1 PRSS1  
FEN1 WRN  
OTUD7B TNIP2  
EEF1A1 SMAD2  
SRSF3 RBM7  
PPARGC1A MED16  
HIST1H3J CRTC2  
LYPD3 AGR3  
SRC ARNT  
EED ANXA5  
HNRNPH1 CPNE1  
JUND BRCA1  
CDKN1B UBE2B  
GMNN CDKN2A  
PHB MAP1B  
ABL1 CELSR3  
ILF2 MAP3K14  
PPFIA2 PTPRS



USP47 MED29  
THRA POU2F1  
MYF5 CALM2  
SRC MLLT4  
HCK ABI1  
PPP1R15A PPP1CB  
TSHB TSHR  
NDUFB8 EIF2B3  
PPP1R15A PPP1CA  
PSMD10 HIST1H2BG  
ITGB4 ITGA6  
FN1 LACRT  
SMAD6 STRAP  
SNRNP200 CHMP1B  
GADD45G PPARG  
ARAF NEFH  
NR4A2 ZNF41  
EIF1B MRPL43  
LRP1 MAPK8IP1  
CXCR2 GTF3A  
UBE2I TAX1BP1  
AR SART3  
HDAC4 ANKRD11  
TPD52L1 GPR135  
SMAD4 ESR2  
CCL7 DARC  
POLR3D POLR3H  
COPS5 MALT1  
C19ORF50 NIF3L1  
NOTCH1 RBPJ  
SMC2 NCAPG2  
NFKB1 SPTBN1  
PEG10 SIAH1  
MAP2K4 MAP3K11  
MAP4K4 BRCA1  
CAMKK2 ESYT2  
PIK3R1 KIF13A  
HERC2 USP20  
MYC BCL2  
FOXG1 KDM5B

TP73 DAB2IP  
GRB2 UBC  
PLEKHF2 APPL1  
NFKB1 E2F1  
CDK4 CDKN1B  
ETS1 SMAD3  
UBE2U RNF41  
KIAA0513 INTS4  
ACO2 WNK1  
CHGB S100A8  
HMGB2CREBBP  
TNFRSF8 TRAF1  
STK25 USP36  
ZNF238 DNMT3B  
ZNF250 GOLGA2  
HLA-B PGD  
TRIM27PRAM1  
CENPA PARP2  
SIX3 EYA1  
PSMC3 HTR1E  
SOCS5 TCEB1  
PSMD14 MCC  
GRB2 DNAJB11  
NFKB1 NONO  
RANGAP1 SUMO1  
PRKCA SYK  
GRB2 GABBR1  
PHYH RNF167  
ATXN10 PHLDA3  
TUBG1 MZT2B  
HDAC1 SNAI3  
FGFR3 ARAP1  
ARRB2 FZD4  
HSPB1 EIF4G1  
SIRT2 KAT2A  
SIRT2 KAT2B  
GRIK5 GOLM1  
NR2F1 BCL11B  
AKAP8L MAGED1  
CCT2 MAP3K5

SHBG AP1B1  
ARHGEF15 C11ORF49  
PCBP1 CELF3  
AKT1 WNK1  
SSRP1 MAL  
ELN LGALS3  
PRKAB2 PRKAG3  
PTS ATR  
SMAD3 RASL12  
SIN3B COPS2  
SIAH1 AFF4  
SYN3 NOS1AP  
MYC DHX37  
KPNA1 TPX2  
SSTR5 PEX5  
ARF6 RAB3GAP2  
RGS13 GNAQ  
KIT CSF2RA  
KCTD13 ARMC7  
GOLM1 GEMIN7  
SFN RPS27A  
ITGB1 PXN  
BAG4 HSPA4  
SLC22A3 ABL1  
TPI1 DDX24  
ATR MCPH1  
MAPK14 DYRK1B  
IRAK2 IRAK3  
NANOS3 ELAVL1  
RBP3 NOTCH1  
SOAT2 TRAF6  
MAP2K1 MAPK14  
CTBP2 RCOR1  
SQSTM1 SMAD1  
RPAP2 RUVBL2  
SQSTM1 SMAD2  
DDT HLA-B  
RFXANK HDAC9  
HNRNPA1 MAPK6  
UBE2I RNF144B

MED18 MED13  
RPA1 DMC1  
RPA1 MCM6  
IPO13 UBE2I  
GABARAPL2 GABARAPL1  
UBE2I DAXX  
CASP1 BCAP31  
RGS2 VPS29  
CHEK2 TP53BP1  
RAD17 H2AFX  
MYL6 SRRM2  
MAPK1 SCNN1G  
TRAF2 PKN1  
EPHB1 EFNB1  
RB1 CDK9  
PPM1A SMAD2  
DLG2 SEMA4C  
NKX2-5 TBX2  
LSM10 ZNF473  
PDGFRA SNX6  
HLA-B HNRNPM  
UBE2D1 RNF10  
CLDN12 STRN4  
MRPL15 SMURF2  
IFNGR1 CANX  
PLEKHF2 CHIC2  
PRKAR1A SSRP1  
ATXN1 STUB1  
IMPDH2 UBQLN4  
NHP2L1 MEPCE  
NXF3 NXT2  
ORC3 CBL  
GSPT1 GABARAPL2  
MSH6 SMC1A  
GATA4 ALX4  
TRAF2 CRY1  
MAX HIF1A  
EWSR1 POU4F1  
ITGB4 ARRDC3  
UBE2D2 SIAH1

ATXN1 PRRC2B  
PROC THBD  
HDAC3 PHB2  
MYB MAPK1  
CREBBP DAXX  
ABL1 ABI2  
PIK3R1 ABCG5  
WWP2 SF1  
TBC1D8 TRAF4  
FBL CDK2  
CLP1 CPSF3  
TNFRSF8 TRAF3  
SLC35B2 MCTS1  
RBL1 USP4  
TP53 TFDP1  
MACF1 PLXND1  
RHO GRK6  
WEE1 SFN  
PRRC2A HNRNPM  
WEE1 YWHAB  
MT1H DNAJC1  
SRF PRRX1  
TCP1 CCT5  
DVL2 DYNLT1  
BMP2 CES3  
PTPN23 DDX24  
CUL9 UBE2E2  
EFS PLCG1  
CASK GRIK2  
PIK3R1 MED28  
PIN1 KLHL20  
USP47 MED9  
COMMD3 ZNF337  
KIT BCR  
RXRA CNOT1  
CANX MTNR1B  
AXIN1 PPP2R5A  
AXIN1 PPP2R5B  
PTH MEP1A  
TCERG1 LUC7L

GABRR2 SQSTM1  
ERBB2 DOK6  
KBTBD6 MAP1LC3C  
CSF1R CSF1  
HDAC3 KLF6  
TRIM27UBE2A  
HERC2 RNF11  
PLCG1 TRAIIP  
BLM ATM  
TMEM62 ZNF287  
NCK2 WBP11  
SLC16A10 RACGAP1  
ADCYAP1 CPAMD8  
TCP1 PDCL  
SREBF2ZCCHC7  
PARP1 NFKB2  
AP1B1 AP2M1  
BCL2L1BNIPL  
TYK2 JAKMIP1  
KDM1ASNAI1  
AP4M1 TGOLN2  
RABIF CCBL2  
HDAC3 HDAC9  
VAV1 TEC  
HSBP1 RB1CC1  
HNRNPH1 YTHDF2  
NME4 TRIP13  
IFITM1 CD81  
CASP3 NUCB2  
ACTA1 OCLN  
IRF2 PRKACA  
YWHAQ PDK1  
XPO1 RAN  
YWHAZ NFATC2  
AP3D1 VAMP7  
ATXN3 EWSR1  
RHOG SMAD1  
ZZZ3 ZNF182  
PDPK1 PTK2B  
HSP90AA1 C8ORF41

PSMC5 PAAF1  
GABARAPL2 ATG10  
PLEKHF2 PLDN  
USP54 CHMP1B  
TGFBR2 ARHGEF6  
APC KIAA1328  
YAP1 YWHAZ  
TPT1 HLA-B  
SRF CASP3  
RPS9 NDRG1  
HTATSF1 CDK9  
GAB2 ARHGAP32  
RAB3C RIMS2  
STK25 CTTNBP2NL  
RANGAP1 SUMO3  
IRAK1 MYD88  
TLE2 CUL4B  
FLT1 GRB2  
CKLF FBXW7  
HDAC4 HIF1A  
TRDMT1 DDX24  
BCL10 KRT33B  
ELF3 AKAP9  
FMNL1 PFN2  
UBXN1 SMAD1  
IRAK1 MAPK14  
TLE2 CUL4A  
TRIM24HNF4A  
FSTL1 APPBP2  
EIF4EBP1 CHTF8  
TP73 HECW2  
AR NFKB1  
PEX5 DDO  
AR WIPI1  
TRIO PHLDA3  
WDR5 ZNF335  
ADD1 SPTAN1  
CBX2 USP7  
TRIP10 FNBP1  
KRT15 MCM10

NCK1 CRK  
CHM RAB18  
TAF12 TAF2  
SSB ARFGEF1  
SYK CBLB  
FANCA FANCL  
BTF3P11 VTN  
MED24 ESR1  
ATP5A1 MAP3K3  
PSMD7 PSMD6  
EDF1 CREB1  
ABL1 CREB1  
PRKDC MKNK1  
MEIS1 HOXA2  
SHC1 SPOCK1  
SART3 C3ORF17  
SMAD7 BMPR1A  
TUBB TUBA1A  
SRC YWHAH  
SHPRH FBXW7  
SYK PTK2  
COL2A1 DDR1  
SRC MST1R  
FBN1 TGFBR1  
KRT18 TUBGCP4  
PHB2 FTSJ1  
SMAD7 TGFBR1  
NPM1 HDAC2  
SMAD7 ACVR1B  
LCK CD48  
CBR1 DDA1  
LEP GHRL  
SMC2 LIG4  
KAT2B TAF9  
H2AFX HIST1H2BM  
DTNBP1 DTNA  
NLRP1 NOD2  
HR HMGB1  
CCNK USHBP1  
HSPD1 MPST



MET MUC20  
TPR TRAF6  
USHBP1 RIBC2  
IFRD1 HDAC2  
GC LRP2  
GTPBP1 LRP1  
MYOD1SMAD4  
EIF4G3 SHC1  
ACHE COLQ  
TAP1 PSMB8  
ATRX EZH2  
PRKX PKIA  
HNRNPC ILF3  
SATB1 CHD4  
YWHAQ PRKD1  
TPM3 TMOD1  
HAVCR1 SEMA4A  
SGTA NME3  
NSF NAPG  
DST EXOC1  
CRK CRKL  
TNFSF11 SRC  
MTOR RHEB  
CD80 CD86  
POMC MC5R  
HNRNPK CARM1  
ELF4 KDM5B  
RPS27AE2F4  
CTCF SMAD4  
TFEC TFEB  
TANC1 CAMK2A  
HIRA UPF1  
ACTA1 FSCN1  
UBE2E1 RNF25  
EEF2 PPP2CA  
MMP1 ITGA2  
RTCD1 COPB2  
GRB2 NFKBIL1  
NUP155HDAC4  
KAT5 FOXP3

SH2D4A DBNL  
PARP1 SENP3  
F2 AMBP  
CETN3 USP49  
ADAM9SH3D19  
RFC1 ATM  
GRN DLK1  
SMAD4 CREBBP  
SAE1 TRAF6  
RBBP7 GATAD2B  
HSPA13UBQLN4  
CFTR AMFR  
SAP30L FEZ2  
CCDC87 RUVBL2  
CCNK KRTAP4-12  
GSK3B PRKCZ  
SNX3 ATG5  
ERCC3 GTF2H1  
CDC42 GTF3A  
TP53 SMARCD1  
UBE2K TRAIIP  
PTEN PTK2  
TP53 TOE1  
AP4M1 GRID2  
DLGAP3 GRB2  
CCDC87 RUVBL1  
HSP90AA1 CDC37  
CBS VTA1  
PRKCB GABRB2  
RELA AKAP8L  
PDGFRB STAT5A  
PDGFB COL1A1  
EEF1A1ITSN1  
SMARCA4 HSF1  
NRIP1 CARM1  
NR3C1 CREBBP  
STX7 ENTPD2  
H2AFX HIST1H4I  
MAGOH RNPS1  
H2AFX HIST1H2BG

CREBBP MKNK1  
PEX14 NFE2  
CDKN1B SKP2  
PROC PROS1  
TSSC1 SERBP1  
ATXN1 DZIP3  
RIOK3 PSMC4  
RBMX CDC5L  
SETD1A WDR82  
NEFL PIAS4  
GRIA3 DLG4  
SOAT2 PRKAB1  
PDGFRB STAT1  
SEPT9 TRAF6  
EGFR AGTR1  
PLCG2 PRKD1  
EXOSC6 MIF4GD  
PIK3R1 DUSP15  
CLTC TRADD  
NPHP1 FLNB  
PRKCZ ZNF488  
GRIPAP1 SMURF1  
DNMT1 WNK1  
CLK2 YWHAG  
AIRE MSH2  
UBE2W TRIM39  
RASA1 GNB2L1  
MTMR8MTMR9  
POLR3D NR2E3  
FEN1 ENDOG  
SHMT2 TNFRSF10D  
SIRPB1 TYROBP  
TBP CREM  
DES NEB  
PTN BARD1  
TRIP13 CYB5R2  
POLR3C GTF3C4  
PAFAH1B3 SDCBP2  
POLR2C POLR2H  
GNAQ RIC8B

YWHAH TSC1  
TGFB1 MMP2  
PHLPP1 SCRIB  
HLA-E B2M  
SOCS1 ITK  
PTPN6 LILRB4  
HNRNPH1 MEPCE  
AKT1 PEBP4  
RNASEH2A SMAD3  
PAX3 DAXX  
STK25 TCP1  
CRYBA2 CRYBB1  
ATG12 RPL36  
TLR2 LY96  
ZFYVE9 SVEP1  
SMAD3 IL1F7  
ADAMTSL4 TUBGCP4  
TTR HNRNPH3  
PDIA3 STAT3  
SSB TRAF6  
PCNT AKAP9  
ZNF434 ZNF167  
SRC TRPC6  
JUP PSEN1  
PPARG CNOT1  
MAX MAPK14  
APPL2 APPL1  
FRS3 BMPR2  
DOK2 EPO  
UBE2I CLTC  
LIN7C SPATA2  
BCAR1 SRCIN1  
TLE4 MSX1  
SHC1 PTPN12  
PRKACA CIITA  
PRKACA NUP85  
LSM1 NDUFAF3  
ENO1 PCNA  
HDAC3 INSM1  
RAF1 COPS3

ZFP36 MAPKAPK2  
MINK1 PKP4  
HSPE1 EEF1A1  
PLG ATP5B  
PTPN6 LILRB1  
PPP2R1B SGOL1  
TGFB1 TGFB2  
SEPHS1UNC119  
NCK1 DNMT1  
MYC MAP2K1  
DNTTIP2 HIST1H2BA  
PTK2 TRIM9  
TOB1 CNOT2  
GFI1B PHC2  
TAF1 SUB1  
EXOSC6 LSM7  
CDC42 TAF15  
MPPED1 DISC1  
GBP2 PAFAH1B3  
CEBPB SMAD3  
PDX1 PCIF1  
MET ITGB4  
LIMK1 YWHAZ  
SRC RPL10  
COL1A2 CD36  
TEC STAP1  
KPNA1 PRPF19  
CYFIP2 PACSIN2  
A2M ELAVL3  
ATXN1 IRF9  
OTUB1 EBNA1BP2  
PDCD6 PEF1  
RB1 RBBP8  
ATG2A MAGED2  
CYB5A TRAF6  
PIBF1 MAP3K2  
INHA INHBA  
SMNDC1 FDFT1  
CRMP1 EPN1  
IKBKB FLNA

CATSPER1 EFEMP2  
UGGT1 SUSD2  
CLOCK EP300  
HMGB1 PTPRZ1  
SYT1 RIMS1  
CENPT PPCDC  
RAB5A RIT2  
CBL SYK  
RHOB ARHGEF1  
ZNF165 EWSR1  
CBL ZAP70  
HSF1 MTA1  
TFE3 PSMD1  
STAU1 INA  
TOP3B ZNF408  
YWHAZ HDAC9  
ATXN1 C1ORF94  
XRN2 TOLLIP  
CDKN2B ARPC3  
CHEK2 VCP  
CDK9 AFF4  
EPHA2 TIAM1  
FXD1 PAM  
RPS6KA5 YWHAZ  
CUL3 ABTB2  
ARNTL RXRA  
TH YWHAZ  
EPS8 HOOK2  
MBP MAPK14  
OLFM2 PKM2  
CD40 NCOA6  
GIPC1 TGFBR3  
ULK1 RB1CC1  
TRAF2 CASP12  
NAA10 NAA16  
CEACAM1 PXN  
ATP5A1 MAP3K14  
CDC123ZNF512B  
PFKFB1GK  
MAX TAF9

FYN EVL  
CD4 SYK  
CDK1 FOXM1  
CRABP2 CCND3  
MED15 MED10  
EEF1D SET  
CLDN1 MMP14  
CBFA2T3 ATN1  
FUS SF3A2  
EPOR BTRC  
CFLAR FBL  
PRKAB1 TARSL2  
APAF1 TRIAP1  
TFDP1 E2F2  
RNF103 UBE2D1  
TOP3B CENPF  
NUP153 XPO7  
MAGEC1 ATP5L  
POU2F1 HOXB13  
RAF1 HSP90AA1  
STK4 MAP1LC3B  
PTPRF FRS2  
HSPA9 MAP3K1  
CCKAR CCKBR  
TRPC3 TRPC5  
SNIP1 ZMYM2  
GH1 UBE2D3  
RAB6A GDI1  
HNRNPH1 RIPK3  
CHRM1 GPRASP2  
TSC1 RAB11FIP5  
HNRNPH1 SREK1  
IFRD1 CTNNB1  
RPN1 ADRM1  
ATG16L1 ATG3  
USP19 SAAL1  
HIST1H3J TAF1A  
PIK3R1 NR5A1  
UBE2G1 DIO2  
PALB2 RBBP8

LCK RPS27A  
LZTR1 SCMH1  
MSH2 ATR  
NR3C1 SMARCC1  
KRT15 PSMC5  
GNAO1 KLHL3  
UQCRB MAGEA4  
UQCRB MAGEA1  
ULK1 GABARAPL1  
HDAC3 RUNX1  
ZZZ3 IKBKG  
RB1 CCNA1  
APPL2 RAB22A  
ADRA1D NOS1  
NFKB1 PCBP2  
SASH1 MED28  
MAPT PPP2CA  
RANBP2 FHOD1  
SERPINH1 EMID2  
NR3C1 PTPRN2  
UBE2I SETX  
PSMD10 PSMD1  
ITGA6 RABIF  
NOC2L MAGED1  
EZR PTK2  
IK KAT5  
STRN SIKE1  
ARRB2 CYTH2  
PSMA3 HHEX  
EGFR RAP1GDS1  
SEC24DCDK18  
UBA1 TAF9  
CCT2 MAP3K3  
HNRNPK ITK  
TEX11 TSC22D4  
UBE2L3 DTX3  
ADAM15 SH3RF3  
PPARG NCOA1  
DNM2 MPP6  
NAP1L1 ATG5



ZNF24 DNER  
EPHB6 CRK  
RFX2 MDFI  
PCNA MDH2  
EPHB6 CRKL  
UQCRQOPTN  
GAPDHNPAT  
SRC CDK5  
MAP3K1 TIMM50  
RXRA ZNF423  
TFPI2 SMURF2  
HSPA2 MEPCE  
FBLN2 BCAN  
H3F3B DNMT3L  
HLA-A SRC  
ANK3 SCN2A  
BAI1 BAIAP3  
RING1 CBX2  
PIK3CARASGRP3  
KAT2B KLF13  
TRIP4 NR2F2  
PCNA RFC5  
PCNA RFC3  
UBE2E1 RNF166  
FGFR1OP2 ZRANB1  
RELA MED23  
ATXN10 STYXL1  
MED26 POLR2F  
E2F1 RING1  
CSF2RB KDR  
MED26 MED22  
RPS16 DDX56  
RGS19 GDE1  
SETDB1 HDAC2  
SLC2A4LEPREL4  
RABEPK PIKFYVE  
WDR48 WDR70  
APOBEC1 A1CF  
CDK9 NUFIP1  
MPG RAB7A

CD4 ZAP70  
MED1 MED20  
GPS2 CNOT2  
CLTC MAP3K10  
STAM2 JAK3  
CDC42 INSL6  
MAP3K14 STUB1  
PPP2R1B NFKB2  
RPS6KB1 PDK1  
MAP2K4 MAPK14  
MAPK14 TRAF6  
RB1 ARID3B  
EIF1B EIF2S1  
KDM4AKDM4C  
CDH1 HDAC1  
FGR IKBKG  
ITSN2 BCCIP  
ARHGDI1 SUMO4  
RPS14 TH1L  
TUBG1 CNTN2  
HIST2H2BE HIRIP3  
CHN1 CDK5R2  
TXNDC11 DUOX2  
TXNDC11 DUOX1  
F2 FGA  
VIM YWHAZ  
SRC MED28  
FAM40A FGFR1OP2  
MPG CACYBP  
MOBK13 CTTNBP2NL  
MITF LEF1  
TRAF7 MAP3K3  
RPA2 RAD51  
ACTG1 TRAF2  
TEC ASAP1  
RPAP2 GPN1  
TAF1 MEF2D  
SNRPF SNRPD2  
EEF2 YWHAZ  
ACTN4 PTPN6

SMAD9 CHPF  
COPS8 COPS4  
YWHAZ ARHGAP21  
EED EZH2  
STK16 IKBKE  
ITPR3 CABP1  
LDOC1 GNL3L  
AIP PDE2A  
SYK LCP2  
PXN PTPRH  
ATG12 MRPS23  
PRKCQ BTK  
SUMO2 POGZ  
RORB NRIP2  
S100A9 ASB3  
PARK7 ARX  
STIP1 TRAF6  
HDAC2 BCL11B  
TCP1 MAP3K1  
DAZAP2 CCDC120  
KCNQ1 KCNE2  
TGFB1I1 SDC4  
DLG4 NDOR1  
SMAD9 KIAA0226  
FAM175A UIMC1  
NEK6 FANCI  
PIK3R1 CBLB  
SAFB RB1CC1  
CCL16 CCR2  
CCT6A PPP2R2C  
KRT18 MAPK14  
MCC CSNK1D  
PDIA4 IKBKE  
SNRPB KHK  
ABL1 NCK1  
H2AFJ HDAC1  
PDZD2 NRXN1  
RFC2 RPS27A  
PRKCA MYLK  
HSP90AA1 TGFBR1

TMPO AKAP8L  
BSG PDLIM7  
SRC DUSP15  
HSPA4 MYST3  
IKBKB HSPA9  
SMAD9 ZNF592  
ARRB1 MAPK7  
GRIA1 CAMK2G  
PDGFRB PTPRO  
NBN DCLRE1C  
VIM ATN1  
PARP1 SUMO1  
HMMR CALM2  
ACTB CAP1  
WBP4 CHERP  
RAF1 STUB1  
FHIT LEF1  
HSP90AA1 FLT3  
HSPA4 HDAC2  
MAPKAPK2 HNRNPA0  
RARA GADD45A  
PRKAR1B WRN  
ARHGAP33 FYN  
WEE1 BRSK2  
YWHAZ EEF1A1  
MEIS1 HOXC11  
SMAD1 PLEKHB1  
PCNA MCC  
RB1 GTF3C2  
HOXD4 CNOT7  
ACTG1 CAPZA3  
PSMC3 USP14  
EGFR KPNA1  
HSP90AB1 MTHFD1  
VAV1 CASP3  
ERBB2 SH2D2A  
DLG4 ACCN3  
NOC2L PHLDA3  
ELAVL2 ELAVL3  
FYN YES1

BRCA2 SMAD2  
YWHAZ WDR77  
KIAA1279 PLEKHF1  
RANBP2 ARFGEF2  
RPL38 CHMP5  
PAK2 PSMB7  
RALYL C20ORF27  
TGFB1I1 HSPB1  
DRP2 PRX  
CIAO1 WDR5  
KRT36 USP8  
SMARCA4 ARID2  
ERBB3 JAK3  
IMMT KIAA1377  
LPAR1 ARHGEF12  
GNAI2 OPRD1  
CUL4A SAP130  
ITGB2 CD82  
GRIA1 SQSTM1  
TECPR2 GABARAPL2  
CAMK4CREBBP  
VHL CCT3  
BRCA1 UBE2D3  
TCN2 GRB2  
CDC42 CDC42BPG  
EXOSC8 LSM7  
DEK HIST1H3J  
SLC25A22 PSMD13  
SPTA1 ENAH  
IFNAR1FBXW11  
IKZF1 IKZF4  
ITGB1 PRKCE  
MAD2L1BP EEF1A1  
TLR5 MYD88  
PRKACA GNA13  
ACTR6 STRAP  
XPO1 RPS27A  
PTN FEZ1  
MEF2C MEF2D  
PIK3CATICAM1

NCOA6 MED23  
PDGFRB PIK3CA  
ACVR1 WDR61  
SS18L1 ATF3  
HCK BCR  
PRKCA PLD1  
WEE1 PLK1  
HDAC4 CAMK4  
TNFSF11 TRAF6  
VIM DYNLL1  
THOC4 LEF1  
IKBKB HSP90AA1  
FYN HSP90AA1  
UGDH AK5  
MTA2 CHD3  
SOX6 DAZAP2  
MLLT4 YWHAG  
MSN IKBKE  
SMAD1 ZBTB44  
TP53 DNMT1  
FCGR2B GRB2  
ERBB4 HBEGF  
BAG3 SRC  
PRICKLE3 NCK1  
WIPF1 WAS  
HSP90AA1 HIF1A  
ZBTB16FHL2  
PLD2 PTPN1  
PFDN1 INSL6  
XPO1 NRIP1  
NUP62 NUP98  
MAPK10 DUSP16  
GEMIN6 DDX20  
PTPN1 SUMO1  
KRT1 KRT5  
MED7 MED29  
PINX1 RPL36  
KBTBD6 GABARAPL1  
MEIG1 SPAG16  
USP5 PMS1

EFS GRB2  
DYRK1A CCNL2  
FYN LRBA  
ELMOD1 THG1L  
PAK2 RNF2  
H2AFX BARD1  
VIM RELA  
MAGEB2 MAD2L1  
FBN1 MFAP5  
HNRNPAB TP63  
UBE2G2 UTP14C  
MLH1 PPP2R2D  
HMGB1 AES  
OLFM2 NBAS  
INSL6 PIAS4  
SMARCA5 HIST1H3J  
FYN BAZ2A  
IRF2 IRF2BP1  
MAP3K14 EDAR  
DDB1 TOR1AIP2  
IKZF4 HDAC5  
HSP90AA1 RELA  
EPB41 TMEM33  
PLSCR1 RERE  
RET MAPK14  
CASP2 GOLGA3  
AKT1 TRIB3  
MAPT RPS6KA3  
MYH14 TRPM6  
BTG2 POPDC2  
BAG6 FAM46A  
RPN1 DPF1  
PPARG LGALS12  
NFKBIB ZNRD1  
C3 PAPP  
LDOC1 DPPA4  
CST4 SOD2  
MAP3K3 DNAJB4  
RELA EP300  
XPO5 ZNF346

PPFIA1 PPFIBP2  
AR NONO  
MAPK8 RASSF1  
ODF2L KIAA1377  
CDKN1A HAUS1  
VPS37AVPS28  
ABL1 LRIG3  
DEDD RSRC2  
SCG2 UBQLN4  
YES1 PTPRE  
BCL3 GSK3A  
BCL3 GSK3B  
ILF3 MEPCE  
SNAPC1 SNAPC4  
MYBPC3 ALK  
COL3A1 MYOC  
IGF1R IGFBP3  
MZF1 FHL3  
PGRMC1 ABCD3  
EMD G3BP1  
SUMO2 RBBP7  
MEGF6 MFAP5  
MYH9 CCR5  
PTN DNAJB11  
ADRA2C EIF2B1  
UBE2L3 CCNB1IP1  
RRAS BCL2  
TOP3B KRTAP4-12  
FST INHBE  
FAM13A ATF2  
ATXN1 ZHX1  
ICA1 MKKS  
SGPL1 TMBIM4  
RBP1 SIRT2  
NUP205MAGED1  
TBX19 NR5A1  
COL4A5 FBLN2  
UBE2U MIB1  
USP1 TAGLN2  
UNC45A BRF2



FES MDFI  
NCOR1 CNOT2  
MTIF2 CSNK2B  
AGL RASSF5  
RANGAP1 SUMO2  
OMA1 PLCG1  
MDM2 C1ORF173  
VTN PRKCB  
FHL3 ADAMTSL4  
LZIC IKBKG  
RFXAP HDAC4  
MAGEA11 ENOX2  
EIF3A DISC1  
GABARAP KEAP1  
TUBB NCOA6  
YY1 ILF3  
GCHFR GCH1  
USP39 RG9MTD1  
SUMO2 TUBB2C  
GZMB PTK2  
GRIK3 GRIK5  
IFIT3 CCDC67  
RER1 HAP1  
SRC HNF1A  
PLK1 CTBP1  
AKT1 TOPBP1  
CLDN3 POM121  
GABARAP SAFB2  
DVL1 DAB2  
HTR2A GNAQ  
CFLAR EPPK1  
ERBB4 LRIG1  
GSN CASP3  
IRAK1 NTRK3  
TIE1 PTPRJ  
SRC CAST  
LCP2 VAV3  
MED7 MED9  
PPFIA2 PPFIA1  
H2AFX CFL1

APC2 ANAPC7  
MSH2 CREBBP  
CENPA HIST2H2BE  
RB1 ARNT  
KIF4A HMG20B  
DLGAP3 PIK3R1  
BTK ARID3A  
PTPN11 GRIN2B  
DLGAP1 SHANK2  
USP54 VPS24  
RGS12 PLCB1  
CD74 CTSF  
RBL1 PPP2R3A  
EMD TRIM28  
MSN SELPLG  
PRKCH SMARCA2  
PTN PTPRS  
RTN4IP1 WBP11  
PRKAR1B SMAD3  
C5 C2  
SETD1A CREBBP  
OLFM2 ROBO2  
DARS GRB2  
XRCC4 APTX  
NFKB2 USP9X  
BIRC5 CDCA8  
POLR3D POLR1D  
BTK MYD88  
ARHGDI1 IGF2BP1  
PDHX FAM3A  
PSMC5 ATG4C  
KIAA0649 CELSR3  
CDC7 DIAPH1  
RANBP2 AKAP13  
PIAS1 SIAH1  
DCP2 UPF2  
PRKCI RAC1  
SOCS3 IL12RB2  
ARNTL PER3  
XRCC6 ILF2

VAV1 EZH2  
HSP90B1 SMARCC2  
GAPDH CDKN1A  
SORD TNIK  
RPS6KB1 NCBP1  
NFKBIB NCOR2  
PIAS2 SREBF2  
TP73 CDK2  
POLR3D POLR3K  
ATG12 DDX6  
CKM MYOC  
MCC PSMD8  
SRC GIT1  
TLX2 MCM4  
MAPK6 MED12  
UBE2U RNF114  
ERBB3 TNS3  
UBTF TAF1D  
MDM2 RRM2B  
VCL C19ORF57  
PRKDC NFKB2  
RTN3 FXR2  
TLR2 MYD88  
SMAD4 COPS5  
ETFA IKBKE  
PCBP2 MEPCE  
CCND1 RBL1  
KRT18 YWHAH  
SOCS3 MAP3K5  
DNM1L SIRT3  
GSN TNIK  
SRC WBP11  
HDAC2 HOPX  
RAB5A GDI2  
SHC1 DDR1  
ZFH3 NINL  
MT2A PRKD1  
PSMB3 PSMB2  
ZNF259 CDK5RAP2  
RPA2 CCNO

SHBG COL1A2  
SIN3A DEC1  
SNAP91AP2B1  
ABCD3 CLN3  
NXN USP3  
NR3C1 PBX1  
HPS1 HPS4  
MCM3 SUPT16H  
GTF2E1MDM2  
TDP2 ETS2  
NFKBIB SRPRB  
VAV1 ZYX  
DLG4 LRP1  
TNF TBK1  
NADSYN1 CUTC  
USP19 SUCLG2  
BCOR RYBP  
MCC GCLM  
TLR4 PPP4C  
EEF1A1TGIF1  
NAP1L1 SMAD2  
MAGEA1 HDAC1  
PAX8 SERINC1  
CDC6 CDT1  
HIST1H3J PARP10  
VIM BRD1  
ZNF205 TRAF2  
POLR2K POLR2G  
GAS7 KHDRBS1  
HGS MEST  
CAV1 TXNRD1  
TNNT2 MAP3K5  
CLASP2 FEZ2  
NDRG2 CTDPI  
TH MAPK3  
TNFRSF1B PRKDC  
GLI2 ZIC1  
TF CALR  
PRKDC HSF1  
SRSF2 ZRSR2

CDK1 HMGB1  
SMAD1 TCF20  
FYN FAS  
GCN1L1 BRF2  
IFI16 TMEM173  
PLIN1 PRKACA  
MTHFD1 HLA-B  
F8 PROC  
NTRK1 PTPN6  
TNR BCAN  
TNFAIP3 TRAF1  
NTRK1 SHC1  
CASC5 MIS12  
CCNB1 CDC27  
KRT1 TJP1  
ZFC3H1NINL  
WDR5 MYST1  
MED10 MED13  
ADAM9SH3GLB1  
SNRPD2 GEMIN5  
BRCA1 CDK8  
PAFAH1B2 CCT3  
MAGEA1 SNW1  
BT3P11 TNFSF10  
FLNA CRK  
MEIS1 HOXD11  
GPSM2 SREBF2  
S100A8 PDCD11  
SRGAP2 WAS  
NONO PLEKHF2  
MBP COLEC11  
TP53 SIRT1  
EGF CPM  
BCAR1 CD2AP  
CRHR1 UCN3  
CD3E CD79B  
CCK CPE  
MBP TLK2  
GFAP COL16A1  
YWHAG FAM76B

HNRNPH1 TOB1  
NFKBIB IKBKG  
ATXN1 GPATCH8  
CYFIP2 PACSIN3  
DHRS7B MED19  
YWHAZ PSMD2  
CCR2 CCR5  
NFKB1 TNIP1  
HIC1 SIRT1  
NFYC SMAD2  
PRKAB2 GCN1L1  
CREB1 RPS6KA1  
PIK3C2A PA2G4  
PPHLN1 CASP5  
SOCS3 IRS1  
PML SSBP2  
SF3A2 SF3B2  
CTNND1 PTPRM  
CCNH MNAT1  
MX1 TRPC4  
CTNNB1 CDON  
SETD1A WDR5  
SPARC MEF2C  
ZEB2 SMAD5  
MMP7 HBEGF  
RASGRF1 NTRK2  
INSL6 GIT1  
CAPZA1 ATG5  
SPTB MAP2K5  
EXOC4 EXOC7  
KRT6A CCDC85B  
MAP3K12 MBIP  
UCHL1 NEDD8  
HSPA1B RAPIA  
RARA STAT5B  
MED25 MED11  
EPS15 UBE2E1  
NF2 SGSM3  
PRKCA PAM  
MITF CTNNB1

HECW1 USP7  
CREBBP EBF1  
SH3KBP1 MAP3K4  
CCDC85B RBM7  
CASP7 GORASP1  
RHOC ROCK1  
MAPT YWHAZ  
ADD1 CASP3  
KDM4ANCOR1  
TBL3 ITSN2  
CHAF1A TRIM28  
CLSTN1 PSEN1  
CRKL GAB1  
ERBB4 ITCH  
SRC PALM2  
SQSTM1 SMURF1  
YWHAZ HIST1H3J  
RB1 SMARCB1  
AKAP8 MCM2  
ATF1 CAMK1  
QARS TRAF2  
CFL1 TXNDC17  
RFXANK RAF1  
EPOR NOSIP  
DUSP11SRSF7  
PDIA3 ERP27  
CEP57 MEGF10  
PTPN7 MAPK14  
NUMA1EPB41L1  
PSEN2 CSNK2A1  
NCK2 HNRNPK  
BRD4 CDK9  
PPP6R3 USP21  
HSPA9 TRAF1  
MYO1CRRN3  
LSM1 N4BP1  
EGFR EZR  
SORBS2 PTK2B  
RPF1 UBAP2L  
PPP2R1A GPRIN1

CUL4A CDT1  
ATXN1 GMEB2  
HSPA1B RBX1  
PSMF1 RBFOX1  
TIMM23 PTP4A3  
HLA-C B2M  
POLD2 POLDIP3  
HCLS1 HS1BP3  
ZNF585B RIC8A  
RHOA RABAC1  
FSCN1 MYO10  
XAF1 BIRC7  
PRPF4 RBM42  
WDR5 WDR26  
ETS1 CAMK2A  
GPSM2 INSC  
COIL SART3  
ARID1A CUL2  
SRC DLGAP4  
MAP2K3 MAPK8IP2  
PRKCA GRIN2B  
INSL6 KLHL20  
NDUFS1 CASP3  
IFRD1 RIT1  
EIF2S1 CASP3  
DSPP CDH5  
NR3C1 PHF3  
IL8 DARC  
PRSS23 B2M  
BLM ATR  
EEF1A1 RNF10  
MAML1 NOTCH4  
PIPOX ODF2L  
H2AFX DHX9  
KNG1 KLK1  
CSF1R SRC  
RPL30 SMAD2  
CD53 IL2  
CTSL1 SERPINB3  
LAMA4 ZHX1



CDK8 MED19  
ARL6IP1 FBXW7  
RFC1 HDAC1  
H2AFJ CUL3  
SMAD4 DCP1A  
CDC42 KAT5  
YWHAB UCP2  
KCNA5 DLG4  
SPOP RXRB  
XRCC1 MPG  
SKIL RPS27A  
MSH2 ESR2  
TBC1D10C PPP3R2  
RECQL4 PRSS23  
ZNF24 C7ORF64  
SF3A2 PRPF8  
F12 KRT1  
PPP1CAID2  
SIN3A TOPORS  
GADD45G ESR1  
TSPYL4NINL  
COL1A1 NID2  
OPRM1 ADRBK2  
TRIM24NR3C1  
PRKCA RPL10  
MEPCE IGF2BP1  
PCGF2 RING1  
MUC1 SIGLEC1  
ASCL1 UBQLN1  
ZNF263 SPG21  
RELA C3ORF63  
PRKDC DDA1  
MYL6 USP18  
TRAF3 MAVS  
YWHAZ TRIM28  
BBS4 EXOC7  
ERBB2 SH2D3A  
KNG1 CAPN2  
PLOD3 CCDC85B  
HNRNPA2B1 VHL

PEX2 C14ORF1  
PSIP1 CASP7  
HIP1 CLTCL1  
IKZF1 IKZF5  
CDK1 DNM2  
ARNT GTF2F1  
NXF1 RBM8A  
RXRB MCFD2  
APC PXN  
ADAM12 PIK3R1  
YWHAQ CALML5  
RRAGARRAGC  
PIK3R2 TGFBR1  
RAB10 MFSD1  
CD3EAP TBP  
PCBD1 GORASP2  
SNRPD2 EPB49  
HOXD13 SMAD2  
TLX3 ING4  
PPP1CCMYO16  
HOXD13 SMAD1  
CCR2 CCL11  
BUB1B HDAC4  
GRINL1A THAP1  
WDR33 UTP14A  
PRKCA GRM1  
EPB41 DCTN1  
EPB41 DYNC1H1  
MRPS25 DDX56  
TPR NUP205  
CDKN1A HDAC11  
HRAS IRAK1  
MEIS1 HOXA10  
OGT TRAK2  
LYN IL2RB  
UBTF IRS1  
BCAS1 RUVBL2  
SRC EPB41L3  
MAML2 NOTCH4  
ESR1 MSH2

PKLR USPL1  
ATM TIPARP  
HLA-B EIF3I  
MEIS1 HOXC13  
HLA-B RUVBL1  
AKT1 PRKDC  
SPTBN1 MAPK14  
USP1 CALML3  
MEIS1 HOXA13  
HAUS1 CDT1  
MEIS1 HOXA11  
TLX3 GTF2A1L  
MEIS1 HOXA7  
SLC35E1 FXYD6  
CUL4B SMU1  
NFKB2 TSC22D3  
ATG12 ATG4B  
HLA-B B2M  
CASP3 CASP8  
BNIP3L EWSR1  
ESR1 PRDM2  
SREBF2ZFP106  
CCND3 MAF1  
WNK4 STK39  
ATG12 AUP1  
PRKCG NOXA1  
YY1 TFPC2  
CIB1 PLK3  
LCP1 WNK1  
CCND1 RBX1  
PRPF40A DDX46  
RHPN2 SMURF1  
OXT ESR2  
REEP5 LETMD1  
ZAP70 PTPN22  
DYNLL1 ACTC1  
HIPK3 ZNF107  
RELA CAMK4  
TRIM27UBE2J1  
CCNB1 UBE2K

SQSTM1 SMURF2  
RECQL5 TIMP1  
ERBB2 PICK1  
PIAS1 SUMO2  
APOE APP  
PSMD4 SREBF2  
TRIM37TRAF2  
TOM1L2 TOLLIP  
BMP2 ACVR2A  
SNCG MSN  
TRAPPC2L C5ORF44  
BLM APITD1  
TLR2 TICAM1  
EP300 CTTN  
ABCF1 WNK1  
CDKN1B UBAC1  
CASP8 CASP8AP2  
ABL1 NCKIPSD  
PRSS23 NIPBL  
TRIM27UBE2D4  
HGS GGA2  
ZC3H14EXOC7  
PIN1 REPS1  
IKBKB TNFAIP3  
HGS GGA1  
PPP1CCIKBKG  
RIBC2 EFEMP2  
PRLHR LGALS12  
TNF BGN  
HSP90AB1 NANS  
SREBF2HIPK2  
NCK1 PTK2  
PAX8 C4ORF43  
PRPF4 TXNL4A  
KLC1 PLEKHM2  
ARR3 AP1B1  
ESR1 FLII  
NCOR1 TAB2  
FES FKBP4  
GPRIN2SFN

XPOT NUP214  
CCDC85B MOBKL3  
BAI1 MAGI3  
PRKACA HDAC8  
RPS27ADDB1  
UBE2U DTX1  
RSL1D1CNBP  
ZNF512B TNKS2  
SHBG APOBEC3C  
PDLIM7 PAK7  
BCAR1 ID2  
GLDC TLR10  
YWHAG WWTR1  
LIG1 RPS27A  
BCL10 COPS5  
FUS SRSF4  
ABL1 SEPN1  
MAPK12 GRB2  
MED28 MED23  
TFEC TFE3  
RARA EP300  
SNRNP70 SRPK2  
ZBTB25PCBD1  
HADHBSQSTM1  
HIST1H3J CDYL  
BTK BLNK  
CBL FNBP1  
TF CANX  
FBXW4 CUL1  
CCNB1 CDC25A  
NR1H4 PRMT1  
COMMD1 COMMD4  
HRAS SNRPE  
RARG HMGA1  
NFKBIB KIAA1967  
DAZAP2 ZC3H10  
DAND5 NFYB  
MYB SUMO2  
ERCC3 XPC  
AES SIX2

ZAP70 SOS1  
CTSG SERPINB13  
BCR DLG1  
NPM1 YY1  
NR3C1 HDAC2  
RB1 BAG1  
BTK PIP5K1A  
RXRB NCOA1  
AHSA1 HSP90AA1  
UBE2U RNF10  
ERBB2 SHC1  
YWHAB PI4KB  
PRKACA KCNJ12  
GADD45B GADD45A  
TP53 XRCC1  
LZTR1 E2F8  
ZBTB17GF11  
UBE2U DZIP3  
FANCMRMI1  
YWHAQ CSNK2A1  
PLK1 ASPM  
UBC RELB  
RAB3D CEP55  
ARHGEF10 WDR48  
WDR18 USP42  
EXOSC8 MKRN1  
RGL2 RAC1  
PTPRS MOBKL3  
HNRNPH3 ZMYM2  
MSH2 ATM  
MTOR PRKCD  
CNTN1 ANK3  
NFKB1 UBE2K  
KRR1 USP49  
KRAS FNTA  
ZBTB5 PPARG  
ETS2 NCOA3  
NR1H3 NCOA6  
YWHAZ EDC3  
CD44 COL14A1

ZNF197 HIF1A  
TP73 MYL9  
SRC APOL5  
YWHAZ SYNPO2  
SH3BP5SOS1  
AHCY PAK2  
AR ZBTB1  
TRIP6 SMAD1  
YES1 KDR  
STC2 EIF2B3  
DVL2 AP1M1  
NFKB1 UBE2D3  
HLA-A HLA-B  
INSIG1 VAPB  
SRC RPS6KB1  
TRIM31IKBKG  
TCEB3B SOHLH2  
KCTD13 KCTD10  
GOLM1 ZFAND3  
GORABRCHY1  
NCK2 KIAA1217  
RAB11A RAB11FIP1  
ARRB2 MAP3K5  
PIK3R1 GAB1  
LDLR DAB2  
ZNF24 SEC62  
NOTCH1 MEF2C  
F5 CALR  
NCK1 CCR10  
CCNB1 CDC25C  
A2M GCDH  
AR NISCH  
TUBGCP3 BTRC  
PRC1 RACGAP1  
YWHAZ LARP1  
FUS SF1  
RBL1 ACTR3B  
LAMA5BTBD10  
HNRNPR BMPR2  
SP110 NAP1L2

HIPK3 MBD1  
ITGB1 CSF2RB  
SRC PTPRE  
FOS AGTPBP1  
HLA-A HLA-B  
TP53 ATF3  
HIST1H3J ASF1A  
GRAP2 ERBB2  
PRKAR1B AKAP1  
C20ORF24 TNPO3  
SPI1 NFKB1  
PAX6 HOMER3  
MOBK13 CCDC59  
MCL1 BECN1  
HSPA4 TSSK6  
RNF2 UBE2D4  
RPL7 USP38  
CSK ZNF182  
PRKAR2A SMAD3  
ATN1 TRIP6  
BCL6 NCOR2  
SRC OGN  
ITGB2 ITGAM  
RUNX1T1 TCF12  
NACA SMYD1  
CUL1 COPS3  
GNA15 CNR2  
SIRPB1 SYK  
CSDE1 STT3A  
RBL1 RBBP8  
ITGB2 AIDA  
GCN1L1 NEK6  
TPI1 LIPT1  
TAB1 DNAJC7  
DDX3X RPF1  
TP53 OTUD5  
MTNR1B GNB1  
SP100 CASP8AP2  
YWHAG NDEL1  
TRIP6 ILF3



MAPK14 DUSP10  
C20ORF24 PHLDA3  
BRCA2 FANCE  
GH1 PSME3  
NUDT18 C19ORF50  
CBLB GORASP2  
SERPINA1 LRP1  
CEBPB HOMER3  
CSF2 KITLG  
RPA1 FYCO1  
TNNI2 TRIM63  
MAZ CSNK2A1  
SREBF2LZTR1  
HCN1 HCN4  
DKK1 KREMEN1  
EFTUD2 SF3A2  
REN PCSK5  
LAPTM5 NEDD4L  
THRB SRC  
YES1 FASLG  
RNF2 UBE2J1  
NFKB1 TSC22D3  
EHMT2 GF11  
PRNP C18ORF56  
TRIP6 KCTD5  
PXN PTPRJ  
JAK1 PTK2B  
TAL1 SKP2  
GPX7 UBQLN4  
KPNA6 ANP32A  
NFKBIE RUVBL2  
HDAC1 LCOR  
HSPG2 GF11B  
PFN1 ENAH  
OPRL1 GPRASP1  
MYC HSP90B1  
NUP62 IRF3  
USP39 MEPCE  
IRAK1 SUMO1  
RNF8 RXRA

MYOD1SNW1  
CCDC85B ZNF337  
GOT2 PAK2  
PRKCB TIAM1  
PPP2CACTTNBP2NL  
CHEK1 CLSPN  
EEF2K RPS6KA1  
DSPP COL17A1  
PCNA EEF1A1  
TRIM24PPARG  
BLM TOP3A  
SNCA CDC42EP3  
SREBF1MED1  
PRMT2 CPSF7  
WBP4 HNRNPK  
CRMP1 CDK5RAP2  
CBL TYK2  
ARF6 QTRT1  
MAPK14 NCOA3  
MED14 MED29  
AXIN1 FAM123B  
NUDT18 KRTAP4-12  
CIRBP RBMX  
DVL2 RAC1  
NUDT21 ITCH  
ZNF101 MDFI  
KCNK3 S100A10  
VCL BCAR1  
RIPK1 ITCH  
KIF5B YWHAZ  
TOX4 EXOSC10  
BRCA1 ZNF350  
BCL2 IRS1  
HLA-B RPS9  
EWSR1 GPBP1L1  
CHD2 PAK2  
CPNE1 UBE2O  
NLRP1 NLRC4  
CREBBP SERTAD1  
PRPF4 DDX23

NCOA2 SLC30A9  
PSTPIP1 AKAP9  
SUV39H1 MBD1  
HBP1 SIN3A  
INSL6 GNE  
TRAF5 NGFR  
SPDEF PCGF2  
E2F1 SIRT1  
MX1 SUMO1  
SYNJ1 ITSN1  
SYT2 NRXN1  
NUDT18 HSD17B14  
ADRB2 KCNJ6  
HMGA1ORC6  
PSMC2 PSMD2  
HLA-B DDOST  
GSK3B IGF2BP1  
CREB1 RPS6KA2  
RAD23A ECSIT  
FBN1 PAK1  
NUP205PHLDA3  
POLR3A POLR3E  
DAND5 NAP1L1  
KLHL22 COPS6  
GIPC1 LRP2  
PAFAH1B1 NDE1  
SMAD4 HMG20A  
MYC MINA  
DPEP3 SPEN  
SH2D1A LCK  
MYOD1HDAC1  
GANABUBA5  
DPEP3 SIN3A  
PIAS2 PARK7  
CCDC130 ZNF165  
GPS2 SIN3A  
GABRDWNK1  
YWHAZ PABPC4  
ACTB PRKCD  
RRAS ARAF

ITGB1BP1 LRP2  
SYN1 BIN1  
EHMT2 KLF6  
EIF1B EIF3M  
SLC9A1MAPK1  
YWHAB RPS27A  
LCK PTPRO  
MAPK14 ROBO1  
RABGGTB PTP4A2  
NBN PAXIP1  
SNCA CYCS  
UBE2R2 DZIP3  
SH2D1A FYN  
GH1 MAGOH  
BCL2 BNIP3L  
CREBBP DACH1  
ADD1 HDAC1  
MARK3MARK2  
PSEN1 PRAM1  
MYB WDR5  
CCL21 CXCL13  
SMAD6 SMAD2  
SMAD6 SMAD1  
BCL10 C9ORF89  
MLLT10 NDEL1  
PMS1 RPS27A  
RPL30 NFKBIB  
SMAD5 RBM4  
YWHAH CAMKK1  
NCK1 ELK3  
NDRG1 UPF1  
EEF2 PPP2R1B  
EEF2 PPP2R1A  
ACTG1 MAP1A  
CYBB ACTG1  
ETS1 RBBP6  
C18ORF56 MDFI  
HSPB1 INSL6  
PIAS2 YWHAE  
HLA-B TRIM28

FANCA DEC1  
KLK3 EPOR  
SYK SLA  
PSMD11 SMAD5  
SH3BP5L PLEKHA5  
DHX36 PRKAB1  
PLIN3 IGF2R  
C1GALT1C1 B3GNT2  
RGS20 GNAO1  
EIF1B VEPH1  
CDC42 WASF1  
TPM2 PIK3CG  
GRIK3 PICK1  
TPM2 PLCG1  
YWHAB BID  
RING1 RYBP  
NGFRAP1 NTRK3  
MEIS1 TLX1  
CHAF1A CHAF1B  
CTNND1 ERBB2IP  
KDM1AHMG20A  
CD2 CD59  
MSH2 RAD50  
TNFRSF10A CFLAR  
EGFR UCHL1  
LYN GP6  
CLK2 FANCM  
RAB10 SEPT9  
COPB2 NDRG1  
FES DOK1  
TBX3 HDAC3  
CD247 CSK  
BAG6 RCN2  
TEX11 MAD1L1  
GNAI2 ADRA2B  
TCP1 STRN3  
EGFR VAV1  
UBE2L6 LONRF1  
ZNF225 SUMO1  
PER2 TNFRSF14

SYK IL15RA  
HNRNPH3 KAT5  
TNFSF11 TNFRSF11A  
SAP30 MTA2  
SRC SH3BP1  
VPS33AVIPAR  
F12 MMP12  
BCAR1 SH2D3A  
FBXW7 HIPK2  
ILK NUP205  
SMAD6 TAB1  
ERN1 BAK1  
CFTR DERL1  
TRDMT1 C7ORF64  
TBL3 AURKB  
FSTL3 SMAD4  
SUN1 TOLLIP  
MEF2A DST  
NR5A2 NRIP1  
SOCS3 EGFR  
PPP3CBMYOZ3  
AR RUVBL1  
NUP214SMAD3  
CCNE1 SMARCB1  
CNKSR1 BRAP  
SMC2 NEK6  
HIST1H1B LOX  
CDC25A CUL1  
SMAD3 C10ORF54  
HDAC3 HDAC7  
HSP90AB1 HNRNPA1  
CASP4 MYCBPAP  
USP33 ZFR  
YWHAB UCP3  
CCDC6 USP7  
RPS27ACARD11  
MAP3K1 MYLK2  
CANX GPRIN1  
EIF3F IMMT  
AK2 ACTR6

PSEN2 METTL2B  
UXT RUVBL2  
ACD TINF2  
YWHAZ ESYT1  
PTP4A3 FNTA  
CCDC85B MCM10  
AHSG INSR  
S100A6 ANXA2  
MSH2 KAT2A  
AR RNF6  
CHEK1 TP53  
UBE2G2 RNF111  
SRC PIK3R1  
ITGB2 DOK1  
TNIP2 IKBKG  
H2AFX EYA3  
RPS27A PINK1  
H2AFX EYA1  
NR3C1 SMARCE1  
EIF5 IKBKE  
SGK1 PPP2CA  
EPB41 TAGLN2  
HLA-B PSMD2  
ATXN1 SREBF2  
ERCC5 NTHL1  
MDM2 MDC1  
FOXK2 AMOT  
SEPT7 SRRM2  
SCNN1B NEDD4L  
KCNJ1 GOLGA3  
MAPK14 MAPKAPK5  
NRG2 ERBB4  
LCK CD2  
PRKACA ITPR2  
ACTR1B CHD3  
EIF1B UCHL1  
FXR1 FXR2  
DDX5 PIK3CA  
RNPS1 RANBP10  
HSP90AB1 SKP1

CCL16 HRH4  
UPF2 EXOSC4  
NR0B2 ESR2  
DSG1 VRK3  
SIP1 GEMIN5  
CAD NFKB2  
GBP2 SERPINB9  
GNAI3 DRD2  
ITGB1BP1 TANK  
IKBKE MAFB  
MYOD1CBFB  
RXRG NR0B2  
UBE2H BRAP  
RNF25 UBE2D4  
NFKBIE CAD  
CFP MTOR  
FOS MAPK1  
FMNL1 PFN1  
TFPT EAF2  
TJP1 TUBA1C  
CTNND1 YWHAG  
NR3C1 NR2F2  
GPS1 CUL3  
CASP3 CTTN  
EGFR MUC1  
SMARCA2 HDAC1  
HCK NCL  
GYG2 GYG1  
GPS1 CUL2  
GPS1 CUL1  
MAPK1 PAK2  
MYC PGAP1  
MBP MAPK3  
XPO1 RANBP3  
FYN SNX12  
PTPRN SPTBN4  
HADHBMAP3K1  
ADRA2A YWHAZ  
APRT TRAF6  
DHX9 SND1



L1CAM RPS6KA1  
PAK3 PLK1  
GIGYF2TNRC6B  
YWHAZ SPTAN1  
UBTF POLR1E  
HIST1H2BG IKBKE  
TUBG1 RPGR  
DVL2 CSNK2A1  
PRNP L1CAM  
HPRT1 MCC  
PPP1CAPP1R15B  
TRPA1 RPS27A  
PPP1CAKIAA0649  
GJA8 TJP1  
AP2B1 LDLRAP1  
MOBKL3 STK24  
GLS ARF6  
VAV2 BZW1  
PLP2 IKBKE  
DVL1 APC  
USP1 WDR48  
RCHY1 PLAGL2  
MAP3K11 SH3RF1  
RPS27AMAPKAPK3  
HEATR2 BRF2  
PPARG NR0B2  
NFKB1 MYL6  
MEIS1 TLX2  
NUDT18 NAT9  
CCDC85B C1ORF111  
GRIA1 GRIK2  
HSP90AA1 MAP3K14  
MYC LARS  
RAD23A MDM2  
SNCA CALM2  
C6ORF47 ENO2  
CAST GRB2  
CREBBP ZNF639  
SRSF2 SF3A2  
UBE2K MARCH7

NCL CDKN2A  
CTNND1 SUMO2  
MYC SRP14  
RBL1 HDAC1  
TEAD1 MEF2A  
STAT1 ELP2  
MAPK1 PAK1  
SMARCB1 UBQLN4  
KRT18 HSPA5  
SRSF9 SAFB  
RPS27A NTRK2  
CSNK2A2 IL16  
THRAP3 TRAF6  
FXR1 C14ORF1  
PSMD8 PSMD13  
ARIH2 WDR91  
LZTR1 L3MBTL3  
FKBP5 IKBKE  
TNFRSF10A RASSF1  
SPCS2 TNFRSF14  
F7 F3  
RAC1 SH3RF3  
POLR2G MED10  
CDK1 GOLGA2  
CFLAR MAP2K1  
USP2 NFKB2  
IKBKE RBM8A  
SERPINB2 PRPF8  
PPP2R1B PPP2R5E  
MED26 MED12  
CLSPN BTRC  
DAXX HDAC2  
SHC1 VAV3  
PTP4A3 MAD2L1  
EP300 FHL2  
RAC3 ZNF706  
SRSF9 SF3A2  
ABL1 C20ORF46  
KRT14 TCHP  
GNL2 LYAR

KDM4AHIST3H3  
NXF1 STRAP  
AR CAV1  
EIF3F EIF3K  
MS4A1 CSNK2A1  
TRAF5 USP7  
ESR2 PPARGC1A  
UNC5C NTN1  
SUMO1 SF3A2  
CCDC85B KIAA1539  
MAPK1 DUSP4  
TP73 ITCH  
RAB27A ZBTB16  
DCTN1 MAPRE1  
SHC2 ARHGAP32  
STAMBPL1 MAST1  
PARP1 CDK8  
DYNLL2 BMF  
RPL27 MAP3K14  
PNO1 TRAF6  
DAZAP2 TCF7L2  
EDNRA GNA11  
SEC16ATNF  
HRAS INSR  
REL HSPA1B  
CHMP6 VPS25  
MRPS9 RBM4B  
TOM1 TOLLIP  
LEPR PTPN11  
NPHP1 UBQLN4  
SP3 NKX3-1  
JAK2 DNAJA3  
CD2BP2 CRB1  
SHBG CECR5  
DVL2 POLI  
CREM CREB3L4  
PRKAR1A FTSJD2  
AKAP5 CALM2  
ARRB1 ZBTB43  
MAP3K1 HSPA1B

ITGA6 CANX  
RPS27AHIF1A  
SRC PAX3  
KLC1 LRSAM1  
ALB LRP2  
MAGOH CNBP  
RNF144A E2F1  
ITGB1 PTK2  
MEIS1 TLX3  
ESRRA PRKCD  
GNB1 ARHGEF18  
PRNP P4HB  
TGOLN2 PLCG1  
ESR1 ZBTB17  
FGFR4 EPHA4  
RPF1 NDFIP2  
ECHS1 DDA1  
KRTAP4-12 ZNF581  
SRC PAX7  
RPS27AMLANA  
MAPK11 DUSP16  
MXD4 SMC3  
CHEK1 ATM  
IL16 DMRTB1  
MMP2 HAPLN1  
PIP5K1B MCRS1  
ZSCAN1 TBX20  
YWHAZ COPS4  
MAP1A DLG2  
CEBPB CEBPG  
CD44 NF2  
UBQLN1 EFEMP2  
S100A8 TUBA4A  
HTRA2 USP7  
HRAS FYN  
FURIN COL23A1  
MSX2 DLX2  
PSMD11 NFKB2  
RPS6KA5 MBP  
SRC DGKA

HSPA4L MCC  
ERBB2 CTNNB1  
GRK5 RCVRN  
RXRB NR0B2  
SLC9A3R1 YAP1  
PRKAB2 GFPT1  
APOB HSP90B1  
RBL2 LIN54  
NBN RRM2B  
TLE1 FUBP1  
KIAA1549 MYO5B  
MCC CRYZ  
ADRM1UBQLN1  
INHA TGFBR3  
APBB1 SET  
AXIN1 EEF1A1  
KIAA1549 CAPS  
MYC NUP188  
CBLB CARD11  
PKD1 TLN1  
UCP2 YWHAG  
CASP3 DCTN1  
HSP90AB1 ACTG1  
DDX3Y SRC  
CYCS NAF1  
ESR1 PAK1  
BET1 GOSR1  
SUV39H1 EP300  
SMAD4 MED15  
SUMO2 LAMA4  
BCAR1 PTPN11  
BCL2 BLK  
TNFSF11 ADAM19  
PLG SERPINB13  
SNRNP200 APC  
VIM C7ORF64  
MAP7D2 WNK1  
GRIA2 GRIA3  
FBXO30 SMURF1  
COL2A1 PKD1

HNRNPK WWOX  
FYN GP6  
SH3BP5 EXOC1  
SIP1 SRSF3  
HLA-C LILRB1  
DCTN1 DYNC1H1  
E2F1 TRRAP  
STRN PDCD10  
ICA1 MKKS  
USP39 GAR1  
ERCC1 SLX4  
KIF6 APPBP2  
FYN TRIM39  
ARHGEF9 PLEKHA5  
EMD PSME1  
FZD8 GOPC  
MCM7 CDKN1A  
ABL1 KIFC2  
DLGAP1 DLG1  
UBA1 CBL  
TNFRSF10A CD4  
NKX2-1 NCOA3  
MYBPC3 TNNI3K  
PLCB2 TRPC3  
PDGFB PDGFRB  
PPP1CCRIPK3  
IRF9 RELA  
RAE1 NUP88  
ELF4 FBXO4  
NVL RPL5  
LIFR IL31RA  
HDAC3 PPP4R1  
MARCH3 UBE2D4  
DLST DLG5  
ERBB2 NF2  
DLG4 MED28  
TCEB1 SPSB2  
KIF5C RHOT1  
STAMBPL1 RNF11  
PFKL NFKB2

MEGF10 TAOK2  
UBL4A USP13  
ACBD3 SMURF2  
PRKCA TIAM1  
CTTN ANKZF1  
HNRNPA3 ARHGDI  
FDPS TSG101  
CD28 CD80  
PSEN2 NOTCH4  
MAP3K1 MAPK8IP3  
MAP4K3 VAPA  
NOL3 SIRPA  
GADD45B MAP3K4  
PLCG1 RPS27A  
CLEC4M CD209  
COL3A1 MAG  
PRLR PTPN11  
HRAS GPRIN1  
C16ORF59 FEZ2  
ZSCAN1 HOPX  
TSG101 VPS11  
HNRNPA1 YWHAZ  
SUPT5H PNO1  
SLC9A3R1 YES1  
FYN NPVF  
BAX BCL2L10  
RAB1A RABEP1  
HSPA1L NFKB2  
RAB27A INSL6  
FAM107A CALCOCO2  
RUNX1T1 TAL2  
SUV39H1 DNMT3B  
CXCR5 GNAQ  
RAB33A RABAC1  
NRP1 NRP2  
PLCG1 GRB2  
RBPMS NEU4  
GDF9 PMF1  
CCT5 MOBKL3  
DLST NAP1L1

ASGR1 HSP90AA1  
TPM2 RRAD  
ARL3 TLE1  
GHR PIK3R1  
NFYC KIAA2018  
YWHAZ AKAP13  
SAP18 GLS  
CENPA CENPK  
GTF2F2 CREB1  
MED1 MED27  
USP1 KRT4  
SRC TRAF6  
TUBB TBCD  
USP46 EIF2AK4  
DLG4 IL13RA1  
SLC7A9HIPK2  
FGF3 FGFR2  
KATNA1 CIAO1  
VCP YWHAZ  
MCM2 ING5  
HLA-B TARDBP  
VAV2 VCPIP1  
XPO1 PHAX  
UBE2E1 RLIM  
BCAR3 PSMD1  
CDC25A CUX1  
SERPINI2 UBQLN1  
HSF4 SLC27A5  
PPP2CBSTK24  
DLG4 MAP1A  
UBE2D2 RCHY1  
TMEM147 ABI3  
PDCD6 ANXA11  
FYN CD79B  
CAPN2 TNS1  
PRKCI USP21  
SUMO2 EEF1A1  
COL4A4 KLK6  
RXRA PSMC3IP  
CGA PTPN12



SYNM DES  
BCL2L1BNIP1  
WDR48 PPP1R9A  
BCL2L1BNIP3  
SMAD3 PARD3  
USP5 RAD23B  
AURKANFKBIA  
NES CDK5R1  
DUT ESRRG  
MXD1 HDAC2  
PDGFRB S1PR1  
SLC25A5 MAP3K1  
SMAD3 PARD3B  
RXRA PSMC5  
CDKN1A CSNK2B  
ITGB1 ITGB1BP3  
MCM2 ORC6  
PLCG1 DLX4  
DNMT3B DNMT3L  
XRCC5 MSX2  
PRKAR1A COL4A3BP  
UBE2E1 ASF1B  
GH1 PFDN5  
TFE3 PDCD6IP  
SPARC COL5A1  
RGP1 RPAP3  
HUWE1USP9X  
HUWE1USP7  
CAMK1D CAMKK1  
PRPH MYO5A  
SOD1 PSMD4  
RBL1 DGKZ  
PURA MEPCE  
RBL1 SNW1  
BTK PIP4K2C  
LAMC1 PDIA3  
PPIC UBQLN4  
PLCG1 ARHGEF2  
GRIK2 GRIK4  
RPA2 CREBBP

CDKN1A BCCIP  
UBR5 CIB1  
COL18A1 TECPR1  
ZNF263 NME7  
PRNP CSNK2A2  
RELA TBK1  
PTPN1 AKT1  
PJA2 RPS27A  
DLG4 KCNJ10  
EPPK1 MAP3K1  
UBE2V2 TRIM5  
GNAQ GRM2  
POLA1 RAE1  
HMGB1 ERF  
HIRIP3 ABCF3  
P4HB FEZ1  
UBOX5 MLH1  
SORBS1 SEMA6A  
PBX3 ZNHIT3  
RPS6KA1 PPP1R3A  
MON2 GGA3  
RNF114 AK5  
CLASP2 CLIP1  
GNAI3 GNG3  
MCC MAP2K2  
RXRA CNOT1  
ABL1 GRIP2  
IRF3 MAFB  
SRC CCNA2  
SPTA1 VASP  
RND1 FRS2  
CD247 DOCK2  
ADCYAP1 VIPR2  
SP3 EP300  
ADCYAP1 ADCYAP1R1  
CDC42 ARHGEF7  
CASP7 NUCB2  
SRC DAAM1  
HSP90AA1 KDR  
GOLGA2 GORASP1

HSPB1 MAGED1  
SPRY2 TESK1  
EEF2K MAPK11  
KLHL8 USP7  
BCL2 ITM2B  
PPM1F ARHGEF7  
HLA-DQA1 SH3GL2  
AKT1 MAPKAPK2  
GNAL USP3  
PSG3 PRKD2  
HRAS PRKCZ  
EXOSC7 UBE2Q2  
PLCG1 RPL11  
PTGS2 COPS7A  
AHNAK XRCC4  
ANK3 MAPK6  
CRMP1 GNE  
ETFA DDA1  
LMNB1 CASP3  
TRAF3IP1 DISC1  
RPA1 WRN  
AKT1 AKTIP  
CD22 LCP2  
GTF2A1 MYLK2  
RAB5C IKBKE  
LRPAP1 RALGDS  
COPS2 NIF3L1  
CDKN2C UNC119  
SRGAP2 YWHAZ  
ISL1 ISL2  
CEP55 PD CD61P  
KCNJ15KCNJ16  
MTA1 DDX18  
RAP2B RUNDC3A  
PLAUR LRP1B  
EWSR1 CFDP1  
HSP90AB1 IARS2  
ATP5C1CCT7  
APP PRAM1  
YWHAQ MTOR

NR1I2 NUCB2  
RAB27A RIMS1  
YWHAQ PIK3CB  
ATG12 SF3A1  
MAD2L1 DSTYK  
DTYMK CDK9  
RGS20 SLC39A7  
AKT1 SETDB1  
UBE2D2 UHRF2  
ABL1 ACTA1  
PLCG1 ISG20L2  
HMGB1RPS27A  
FYN CBLC  
RSL1D1LYAR  
HSPA1B PRKCA  
HSP90AB1 YWHAZ  
IKBKE HYOU1  
PLCG1 MAP4K1  
RALA EXOC2  
SIN3B SETDB1  
TSHR STAT3  
CRMP1 KLHL20  
HIST1H4I RBBP7  
TOM1L1 GRB2  
UFD1L AMFR  
VHL GRPEL1  
DDAH1 RPS6KA1  
UBTF TAF1C  
ZNF263 ZSCAN30  
LYN TRPV4  
CASP3 IL18  
PIAS2 HUWE1  
NEK9 SUPT16H  
GABARAP GABARAPL2  
ZNF76 HDAC1  
SOCS3 CXCR4  
CCR10 CCL19  
PRPF40A WBP4  
SRSF2 CCNL2  
PLCG1 EPOR

ELAVL3 ECSIT  
EIF3A EIF3M  
HEATR2 NEK6  
LY86 CD180  
ACP1 MRPL20  
PSEN1 FAM82A2  
ADCYAP1R1 CALM2  
EIF3J EIF4G2  
MUC1 GSK3B  
PDZD2 CTNND2  
CUX1 CYTH2  
NKX2-5HDAC1  
NFASC NCK1  
PLK1 SLX4  
ITGA4 CD81  
CCT5 PPP2CB  
WIPF1 PSTPIP1  
AKT1 PPA1  
MX1 DAXX  
GTF2F1 GTF2B  
ATXN1 SAR1A  
GNAI2 RGS4  
GNAI2 RGS19  
RFC4 MEPCE  
STAM2 LCP2  
YWHAH BAD  
RASGRP1 HRAS  
NCBP2 KPNB1  
COX5A COPS6  
CDC27 SMAD3  
KCNJ4 LIN7C  
PLCG1 COPS5  
NCOR1 SAFB2  
S100A6 MDM2  
TUBG1 RAB8B  
CASP14CASP2  
RAC1 DLG5  
TUBB IKBKE  
MYST2 ORC2  
MYST2 ORC1

LTA TUBA1A  
TOM1L2 RNF11  
GPI PARP14  
RAMP1 VIPR1  
ATXN1 SAR1A  
YWHAG PRKCZ  
VAV1 PIK3R1  
PPIC LGALS3BP  
CUL4B DDB1  
DBN1 ZNF598  
ARIH2 UBE2E1  
YWHAG SRSF11  
PRKCA RPS6KA2  
ATXN3 VCP  
INSL6 MOBKL3  
VHL PSMB3  
YWHAG PLEKHA5  
NAP1L1 TRADD  
EZR ROCK1  
CDC42 DYNC1H1  
BRCA2 PMS1  
CASP2 CASP7  
CASP2 CASP9  
COPS2 KLHL13  
SNCA YWHAE  
PAX3 CIB1  
NUDT10 RASSF1  
SGTA TMPO  
CD4 MARCH4  
PLG F3  
CRK FASTK  
PROC MMP15  
SLC8A1TRPC3  
TRAPPC6A RAD54B  
H2AFJ PAK1  
MRAS RASIP1  
ESR1 CHD9  
NR2F6 RARG  
RCHY1 CAMK2A  
SH3KBP1 SH3GLB1

PPP2R5E SGOL1  
SHC1 PRKCD  
ARNT AHR  
PPP2CAGOLGA2  
CCDC85B NEK6  
HIST1H4I TAF12  
WWC2 RUVBL1  
MAPK1 NR5A1  
ATXN1 LDB1  
PEBP1 PINX1  
LGALS1 SNRPB  
UBTF TAF1A  
FASLG PTPN13  
VHL TMED10  
PSEN1 YME1L1  
CSNK2A1 KLF1  
WAS TRIP10  
FYN PRX  
FOS ELK4  
PTEN MAST2  
ENO2 MAP4  
TXNL1 PSMD6  
ATN1 CHR1  
LAMA1 FBLN2  
WIPF1 SRGAP2  
UTRN PGM5  
GNL2 DDX56  
HIST2H2BE TBL1XR1  
CLASRP CLK4  
S100A6 YWHAZ  
CALCOCO2 FAM164C  
SHC1 CALD1  
PRMT5 HIST1H2AE  
MAPK6 LDHB  
ENO2 C6ORF47  
FURIN ADAMTS1  
UBE2U RNF11  
ZSCAN1 TIMELESS  
LYZ LRRK1  
PFKFB2PRKACA

HNRNPU ZNF689  
MYH10 MAP3K1  
MED6 PARP1  
MAP3K1 DNAJA3  
PAK3 CDC42  
BAG3 HSPA1B  
CHRM3 SET  
HNRNPR SRSF9  
ESR1 MAP3K1  
HDAC2 MTA3  
VHL HINT1  
HES1 UBQLN1  
RPS27AHIST2H2BE  
SH3BP5L NINL  
SMC2 CASP4  
TNFRSF1B CAV1  
SRC ATP2B4  
AKAP10 PRKAR1A  
RXRA FUS  
CCND1 NPDC1  
SHC1 ALK  
CDK2 HIRA  
PTS PRKG2  
CRK PTK2B  
MAP3K14 TUBB2B  
MAPK1 MAP3K1  
ERN1 MAP3K5  
SMNDC1 PDCD7  
EGFR RUSC2  
NFYA ZHX3  
L1CAM RPS6KA2  
RXRB TAF11  
MXD4 SIN3A  
EHBP1 EHD2  
RBBP8 TGIF2  
GPS1 ITPK1  
HDAC1 DACT1  
GSK3B QPCTL  
ACTN1 SSX2IP  
AGTR2 MTUS1



STIP1 PTGES3  
CLTCL1 WNK1  
HCK STAT3  
HDAC3 SYK  
IGF2 IGF2R  
RPL37AOPTN  
GFI1B HECW1  
PDGFB TSPAN32  
HERC2 USP16  
NFKBIA NKIRAS2  
IGF1 IGFBP5  
NCAN NCAM1  
ITGB2 CYTH2  
ESR1 TRIM28  
DDIT3 RPS27A  
CDKN2B MAGEA11  
POLR2E MED29  
ZEB2 YWHAG  
UBE2I DNMT3B  
DEDD2 NR2E3  
PDIA3 LAMB3  
PDIA3 LAMC2  
FN1 MEP1A  
MAP4K3 SLC44A1  
CUL1 OSBPL10  
PRKAR1A ARFGEF2  
APP NECAB3  
PRKAR1A ARFGEF1  
NFKBIA NKIRAS1  
FYN TDRD1  
BCL2 BCAP31  
GPRIN1AKAP9  
PHB2 EZH2  
RICTOR MAPKAP1  
CCT8 RELA  
HTATIP2 NCOA5  
SKIL ZMYM2  
PPP1CAPHACTR1  
GAS7 GAPDH  
DPYSL2 DPYSL5

VHL GNB2L1  
PRMT1 TMBIM4  
GSK3B BICD2  
ALS2CR8 LMO3  
EGFR VAV2  
HSPA1L RIPK1  
UBE2I SAE1  
CHEK1 SMAD4  
COIL KLC4  
DNMT1 EZH2  
SLC6A1STX1A  
TDRD7 ATXN2  
PPP1R12A PRKAR1A  
TGM2 LTBP1  
HDAC1 TAB2  
TSC22D1 XPO5  
ERG SPI1  
IGF1 CTSB  
SNRPB LSM11  
EZR ACTB  
ADRA2A GNAI1  
MGEA5 CDC37  
SQSTM1 IKBKG  
GNAI3 CCR5  
PRPF40A SF3B1  
TOMM20 FEZ1  
EIF2AK2 ILF2  
EIF2AK2 ILF3  
MAPK8 DUSP22  
SUMO1 NCOA2  
YWHAE MAP3K10  
SMAD9 FN1  
ESR1 PTEN  
FOXL1 BMPR2  
NSFL1C FAM32A  
RXRB NR4A2  
DUT NUDT18  
YWHAG TNS1  
TP73 PIWIL1  
ABL1 GABBR1

TKT FBXO11  
MAP3K3 MYO1A  
UBL4A UFD1L  
DEK HIST1H1A  
EXOC8 EXOC4  
SMAD3 ZBTB3  
FGFR1 BNIP2  
SASH1 SUV39H2  
RAB1A FSCN1  
SLC25A6 IKBKG  
GAPDH PRDX1  
DLG3 KRT82  
RPS5 IKBKG  
FOS SUMO1  
GNGT1 GNB2  
ADCY5 GNAS  
LCK NOTCH1  
DLG4 FZD7  
HIST1H2AL RYBP  
CDK1 USP32  
ZBTB43 TCEB3B  
CRK FLNC  
CREBBP ING1  
RAB7A TRAF6  
MAP4K3 SH3GL2  
HSP90AB1 HSPH1  
REST SIN3A  
GSTK1 IGF2BP2  
PCNX KDM5B  
CRMP1 MOBKL3  
TRIM63 MYOZ1  
MCM6 USP7  
KAT2B TAF6L  
ARAF BAG6  
BIRC5 CDK1  
HTATSF1 FEZ1  
BTK CBLB  
PRKAB2 GYG1  
GC GRB2  
TP53 MAGEB18

ADM CALCRL  
CASK KCNJ4  
DEDD2 GTF3C3  
PSMD10 MAGEA4  
C16ORF48 TSC22D4  
RAF1 AKT1  
GDF9 CDKN2C  
TRIM24CYP27B1  
GSPT1 MCC  
ATXN10 GSTK1  
PLXNB1 RAC1  
ALAS2 GRB2  
ATN1 PRRC2B  
NR4A2 SUGP2  
BRCA1 SMC1A  
RAB10 SYTL3  
PAN2 NUP93  
KAT2B NCOA3  
SRC CD2AP  
MAP2K6 TAOK2  
PPP2R1A TNIK  
CHEK1 ATR  
BRCA1 MDC1  
ERBB2 ERBB2IP  
CYBB RAC1  
EPS15 UBE2D1  
POLR2E MED9  
HNRNPK PIN1  
AKT2 PRKDC  
CREBBP SERTAD3  
CCL18 EEF1A1  
VTN AMPH  
ESR1 MTA1  
POLA1 XRCC5  
ADAMTSL4 DNPEP  
SMCR7 RABAC1  
PSEN1 APBA1  
CREBBP ANAPC5  
USP19 ATAD1  
CREBBP ANAPC2

RBBP7 BAP1  
SMAD4 ERBB2IP  
NCK2 ABI1  
IGF1R PXN  
S100P RAGE  
NFKBIE PSME3  
FYN C6  
GNAO1 GPSM2  
YWHAZ MARK4  
KDEL2 SERINC3  
RPL23 MEF2D  
CSE1L YWHAZ  
HRAS MAP2K1  
HDAC1 SMEK1  
PPP6C TGFBR1  
CDK1 FANCC  
PJA2 UBE2D2  
NCOA4 RNF14  
MAP3K3 UXT  
TSC1 FBXW5  
NAA38 USP4  
DVL2 PPM1A  
FAM48A USP22  
TEAD1 MEF2C  
RPAP1 PHF8  
DLG1 MAP3K3  
PLD2 LCK  
PLK1 RACGAP1  
DSC3 PKP4  
CTNND1 FER  
NR2F6 RBMX  
DDX24 TMEM9B  
PPM1D RPL5  
SIN3B MAD1L1  
RHOTB3 RAB9B  
CS DYNLL1  
RPS15AEWSR1  
PPP1R14A CSNK1G1  
SRC CD33  
TNFRSF1B ASB3

UBE2I ZMYM2  
PRKCB GRIN2B  
SDCBP EFNB2  
PRKCA RALBP1  
CEBPB SP3  
TNNI2 SMURF2  
EFS TRAPPC6A  
TCF4 CTNNB1  
ITCH SH3GL2  
SRSF1 RNPS1  
FHL3 ADAMTSL4  
SPTA1 FASLG  
SRC CDCP1  
AKT1 PEA15  
DAXX CREBBP  
YWHAZ ZC3H13  
DPEP3 HDAC2  
TOP1 SMAD2  
CFTR SLC4A8  
AKT1 PDK2  
GABARAPL2 RNF123  
SYT9 TRPV1  
VCAN ITGA4  
PRICKLE3 ABL1  
MRE11A PRMT1  
YWHAG CENPJ  
PTPRS RAB35  
SRC DAB2  
SMAD1 MBD1  
DST DISC1  
NACA IGSF21  
SMARCA5 MAF  
KHDRBS1 DHX9  
SRSF1 SREK1  
CCND3 CDKN1B  
STMN1 STAT3  
EED TGS1  
UBC CDKN1A  
MDM2 DAAM2  
PLD2 FYN

RCN2 TRAF6  
ABL1 SLC9A2  
CAPRIN1 PINX1  
CSNK2B PACS1  
EIF2AK2 FANCC  
PSIP1 CASP3  
FGFR2 FGF23  
CDC45 MCM10  
PPP2R1B BSG  
GBAS PFKP  
RHPN2 TRAF6  
HSP90AA1 AHR  
UBE2I ARX  
CXXC1 ASH2L  
TNFRSF10A CASP10  
CCNDBP1 TCF3  
GPC1 COL18A1  
HSPA4L PHLDA1  
CBL GAPVD1  
GJA1 NOV  
CASP3 PARG  
INSR RASA1  
HDAC3 ZFP36  
RAB25 RAB11FIP5  
MLH1 FASTKD5  
RAB7A RNF115  
BTF3 POLR2B  
TGFB2 TGFB2  
CDK8 MAML1  
EFTUD2 RNPS1  
PCSK1 PCSK1N  
PGK1 UBA5  
MAP3K5 DAXX  
MCM3 CCNA1  
LAMA1 HSPG2  
GCG MEP1A  
GPR37 SYVN1  
CALM2 NFKB2  
RAD23A EWSR1  
CDK14 YWHAQ

ADORA1 GRM1  
NR3C1 ACP1  
TLX1 PPP1CC  
GJA1 CSNK1D  
GCG MEP1B  
SASH1 NCK1  
LZTR1 CNOT6L  
CEP55 TSG101  
CSNK2A1 XRCC4  
CCT5 ACTA2  
CRYBB3 SRRM1  
SYNJ1 CDK5  
SKIL IL1F5  
TFAP2B HIST1H2AC  
ALOX12B KRT5  
AR SREBF1  
KRT18 PKP3  
ATG12 KRT31  
SAP18 CLPP  
YWHAQ FAM83G  
CRMP1 LSM2  
HNRNPA2B1 HNRNPH1  
RPAP2 GTF3C3  
PIK3R2 SEPT2  
KAT5 CCDC106  
NR4A1 MAPK1  
PPFIA3 PIK3R1  
CENPF BRAP  
VIM SERBP1  
MPG PSMD7  
SERPINB9 INSL6  
MDM2 SREK1  
TACR1 GRK5  
CD33 PTPN6  
EEF1A1ORMDL3  
PPBP CTSG  
INS TXNDC17  
HIST1H4I TAF9  
SNAP25VAMP2  
UBE2U VPS11



HGS EXOC7  
EWSR1 KRR1  
AR EFCAB6  
ACAN MMP19  
MYOG TCF3  
USF2 TRPV5  
UBE2U CADPS2  
GABRDUBQLN1  
E2F1 NCOA3  
TMEM62 SLC27A6  
PPP2R1B RAB7A  
SLC9A3R1 LPAR2  
HABP4 FRA10AC1  
ZFYVE9 ERBB2IP  
ICAM3 CD209  
NUP153 RAN  
RAD23A PI4K2A  
M6PR GGA1  
M6PR GGA2  
RBX1 GAN  
CREBBP POU2F3  
YWHAG PRKCD  
SDCBP2 ZCCHC17  
CBFA2T2 RERE  
UBE2I SREBF2  
YWHAZ TP53BP2  
PRSS8 ATF7IP  
CDH1 MYO7A  
NR0B2 SMARCC1  
YWHAB MPRIP  
EEF1D CDC42  
CDKN1B CDK6  
CDKN1B CDK5  
H2AFX CALM2  
HSPA4 LIMK1  
NCOA6 RORB  
POLR2B POLR2K  
CTBP2 BAZ2B  
CLASP2 CLIP2  
CLK3 YWHAG

ATN1 AGRN  
YWHAZ PFKP  
TP53 CREBBP  
TP53 MYST3  
NPC1 NPC2  
GSTK1 COPG  
FHL1 IKBKE  
FGB LPA  
RPS16 LYAR  
TMEM173 MAVS  
CRK DOCK1  
EZH1 EZH2  
IDH3B IDH3A  
PIK3R1 CHAF1A  
TP53 HDAC2  
IMPDH2 IKBKE  
MAX EP300  
MAPK14 MOBKL2B  
NCOA6 ESR2  
AR CASP1  
EMID2 EMID1  
H2AFX PPP1CA  
MED14 MED21  
PTPRC CXCR4  
OGT SNAP91  
CD3EAP UBTF  
RPS27ANLK  
LIMS1 SMURF1  
HSP90AA1 MAP3K3  
GADD45G LUC7L2  
NANOS3 KANK2  
HLA-A B2M  
PARK2 TRIP13  
TP53 TFAP2C  
PTPRC RNF11  
NCK2 SF3B4  
YWHAZ LIMA1  
SLC25A5 TRAF1  
PIP5K1B SPOP  
PSEN2 NOTCH2

POLR3D SMAD2  
PRKAR1A ITGA4  
ZBTB25SUMO2  
CHEK2 FOXM1  
AXIN1 SMAD2  
NCOA6 CREBBP  
HSP90AA1 NPAS2  
TNNT1 TNNT2  
ZNF365 NDE1  
PPARG ZNHIT3  
ACTB PHACTR4  
MAGI1 ACCN3  
ABL1 BRCA2  
NOTCH1 APBA1  
PPARG MED1  
PPARG JMJD1C  
PPARG NFKBIB  
USP1 ALDH16A1  
ESR1 PRMT2  
PPARG TRIP4  
CASP8 FAF1  
RPS27AEP515L1  
EEF1A1PAFAH1B3  
ANXA1 USP25  
FN1 COMP  
MDM2 TSG101  
SART1 MEPCE  
RPGR KIF3A  
KIF5B MARK2  
CREBBP GMEB2  
C20ORF24 ANKRD6  
LMNB1 CASP6  
CD7 SECTM1  
PROS1 F5  
ITPRIPL1 UBQLN4  
RBL1 HDAC2  
TLE3 NDRG1  
NSMAFNEK9  
NRIP1 NR0B1  
USP6 CALM2

PRKCD CDCP1  
HSF2BPHSF2  
H3F3B HDAC9  
TNFRSF1B CALM2  
ACTR6 RUVBL2  
PHB2 DDX20  
DNAJA3 PHLDA3  
RNASEH2A CREBBP  
GSK3B E2F1  
FHL1 FHL2  
NEK3 VAV2  
PEX5 SCARB1  
USP49 IPO9  
DAND5 NCOR2  
CRP FCN2  
MYH10 WNK1  
ARIH2 UBE2D1  
DRD2 NCS1  
GADD45A HIST1H1A  
ATXN1 ZC3H7B  
C1QBP GAB1  
JAK2 CXCR4  
NFATC2 TAF9  
FYN BRPF3  
ADD2 PRKCD  
ZBTB8B ZNF408  
PPP2CB TRAF6  
CAPZA1 CCNA1  
MAP1LC3A PRKAG2  
PTS ATM  
SUPT3H TAF5  
ABI1 WASF1  
ZNF24 ZNF174  
IL1RL1 TMED1  
HAT1 HIST1H4I  
SMARCC2 SIN3A  
MAP2 GRB2  
SRC ITK  
KRTAP4-12 RERE  
ATP1B1RPS27A

TRIM27 KCTD15  
MEF2D ASH2L  
NFKB1 RELB  
MAPK8 SPIB  
CUL4A DCAF11  
HSF1 FKBP5  
MSH4 MSH5  
ABI1 PIK3R3  
CDC42 KHSRP  
TAPBP HLA-C  
ALDOB ATP6V1E1  
TP73 PPP1R13B  
GFI1B JAG2  
PLG IGFBP3  
SUV39H1 HDAC4  
PSMA5 CCR5  
WASL GSN  
LCP2 GRAP2  
GSTK1 SRPRB  
TP53 PIWIL1  
IL2RB STAT5A  
YWHAB SAMD4B  
IL2RB STAT1  
ZFAND5 PSMD6  
EMD PDCD4  
CREBBP TBX21  
SUPT5H ZFYVE9  
JAK1 IL27RA  
CACNA1C RIMS1  
TRAF5 RIPK2  
SNCA SNCB  
RARG NCOA1  
TESK1 SPRED1  
TESK1 SPRED2  
CYP27B1 GTF2B  
MAPK1 FCGR2B  
HSPB1 MED31  
MDM4 PRKCD  
U2AF1 SF3A2  
ACE BDKRB2

RELB TUBA3C  
DVL2 DPPA2  
ARF6 DDX19B  
RPS6KA4 MAP2K1  
RPS6KB1 SYK  
CSNK2A2 SLC38A1  
AGFG1 EPS15L1  
TIRAP BTK  
MED30 MED19  
COPS5 COPS7A  
PTAFR RPS27A  
COIL ZNF277  
CLP1 TSEN15  
ZNF24 ZNHIT3  
YWHAZ NUFIP1  
WASF1 BAIAP2  
PGRMC1 EFHD1  
SLC9A3R1 SLCO1A2  
IMPA2 HERPUD1  
NMT1 HPCA  
SLC9A3R2 TRIP6  
IKBKE RPL36  
BTF3 CSNK2B  
CSNK2A1 SPTBN1  
CDK4 BAG6  
PHF10 CELSR2  
TGFB1 SNIP1  
MYST2 CALCOCO2  
XPO1 TOP2A  
TMCO7 MACF1  
TERT NAT10  
NAE1 TRIP12  
SMAD1 MKL2  
KCNJ3 KCNJ9  
MTF1 CREBBP  
RNF40 USP15  
GSTK1 GTF3C3  
MLLT4 PVRL2  
RAB3B GDI1  
CD2BP2 EWSR1

APC AP1B1  
STRN TCP1  
FYN TRPV4  
FOXS1 BMI1  
TEX9 CCDC112  
APAF1 NLRP1  
YWHAZ REEP6  
IKBKB PRDX3  
EDNRB NANOS3  
HGS HAP1  
RNF40 ZNF451  
DNMT3B BAZ2A  
ESR1 EIF3I  
EWSR1 RMND5B  
ATF2 UBE2I  
GH1 C12ORF23  
NPAS2 NCOA3  
KAT5 FANCD2  
NLRC4 NOD1  
HSP90AA1 HIST3H3  
ABL1 PAG1  
FZD6 WNT4  
PRPF40A CYFIP1  
CYP27B1 ACVR1  
SMAD4 TSSK3  
ESR1 ITGB3BP  
RPLP2 ADRBK1  
ESR1 FKBP5  
YWHAQ KRT9  
VAV1 SHB  
GRB2 SLC23A1  
RUNX2 LEF1  
SRC PKD1  
PABPC1 PCBP1  
PSMD12 IKBKE  
PABPC1 PCBP2  
SNX2 EGFR  
SFPQ SP3  
SRC TNFRSF11A  
KRTAP4-12 THAP10

CUL3 NFE2L2  
SOD2 HLA-B  
CDK16 CDK5R1  
NF2 AMOT  
PRPS1L1 PRPSAP1  
PLSCR1NEU4  
EGFR CDC25A  
SRC EFNB1  
DCAF17 DDA1  
CCNA1 XPO5  
UBE2I RBBP6  
F10 GAD2  
GTF2H1 E2F1  
UBXN2B VCPIP1  
SLC34A1 BSPRY  
PRKCA TNNT3  
ADH5 CHD3  
TUBG1 MARK4  
TP53 ITCH  
DCTN1 SEC23A  
RBPJ NOTCH4  
HGF ST14  
ALDOAU15  
XRCC1 CHD1L  
DEXI GOLM1  
NFKB1B BTRC  
SART3 RPF2  
ADAM12 PACSIN3  
HAND2 COPS5  
POLR3D ATF3  
RBPMS LRRC41  
PRMT5 YWHAB  
UBE2D3 TRIM31  
PLCG1 LAT2  
SUMO2 ZMYM2  
ITGB4 YWHAB  
NCOR1 SIRT1  
PCGF2 CBX2  
PTPRC CBL  
HTT NEUROD1



HGS UBQLN1  
TTC3 WNK1  
POLR3E POLR3H  
MYC PVALB  
IKBKB PEBP1  
HSP90AA1 SHC1  
GPRIN1NANOS1  
FHL2 TNFRSF11A  
ADA DPP4  
USP19 DOCK7  
PIK3R2 ERBB4  
SYT1 S100A13  
GSTM4 IGSF21  
NUP37 NUP133  
ZBTB16CCDC109B  
TFRC RANBP9  
PDIA4 EIF2B1  
AP4M1 LAMP2  
CHEK1 CUL4A  
ITPR1 HOMER2  
AKR1B1 TFE3  
BAX BBC3  
CHEK1 CUL1  
UBE2I ZFP106  
SERPINA1 KLK3  
TLX3 IRF9  
SEPT7 CDC42EP3  
FYN NCAM1  
GRIPAP1 LGALS12  
FANCA FANCF  
LSM1 VPS11  
SF3A2 CDC5L  
RNF111 SMURF2  
MED10 MED4  
HGS VPS4A  
FYN ASAP1  
STK16 MELK  
ITPR1 HOMER3  
UBE2I HIPK2  
JUND BCL6

NUP153 NUP50  
PRKCB KIT  
KIT CISH  
PLG ENO1  
FGFR3 KIAA1377  
EGFR PDGFRB  
CASC5 DSN1  
PPP2CAIGBP1  
SDCBP WDR91  
SRC GRB2  
MAPK1 CASP9  
USF1 USF2  
AKAP5 DLG4  
ZBTB16LYAR  
CUL4A TRPC4AP  
HSP90AA1 CHTF18  
NKAP LUC7L2  
PSMD14 IKBKE  
BCAR3 SERBP1  
PSEN1 CASP8  
MLLT4 SORBS1  
DSPP UBAC1  
LYN HCLS1  
RAB7A RHEB  
STMN1 CSNK2A1  
PLEKHM2 SLC39A1  
ATXN1 HDAC4  
TACC2 EP300  
UBC SMURF2  
ERCC3 GTF2H3  
RHO PPP2CA  
POLR2G POLR2L  
CLOCK ARAF  
TPR MAP3K4  
TAF4 TAF1  
MAP3K14 HSPA1B  
CNTN2 EP300  
SELL MSN  
CNTFR LIFR  
HIPK1 DAXX

MPP3 B3GNT8  
MAP3K10 KIF3A  
HMGCR PRKACA  
MAP2K2 CASP9  
GPR37L1 PRCP  
DEK ZIK1  
MLH1 MYL6  
MPG PSMC2  
PIK3R1 PDIA2  
ZSCAN30 ZNF434  
PCBP2 QKI  
USP8 YWHAG  
UBE4A UBE2D4  
ETHE1 HDAC1  
CPNE6 AK5  
BRCA2 WDR16  
RANBP1 RAN  
FLNA RELA  
CSNK2A1 PIN1  
PIK3R1 LCP2  
ELANE VCAM1  
COG3 COG6  
TNFSF11 KHDRBS1  
NHP2 TRAF6  
PITX1 RBPMS  
BTF3P11 VWF  
TGFB1 SMAD2  
SERPINA3 ELANE  
EIF4G1 ZC3H7B  
ZAP70 GRB2  
FANCA CRK  
AP2M1 MED4  
KLK2 SERPINB6  
HSPB9 NUDT5  
JUP RAB8B  
WBP4 DNMT2  
SRSF5 SRPK1  
CSNK2A1 EIF4EBP1  
ZAP70 RPS27A  
DAZAP2 DCUN1D1

PFKFB2PRKCA  
MAP4K4 PRKCE  
EML1 GRID1  
APRT IKBKG  
CSNK2A1 HDAC1  
IL18BP IL18  
GLI3 TWIST1  
ARHGEF7 LASS2  
HGS ACLY  
MAP2K5 MAP3K3  
AKT1 ASXL1  
STRN CCT3  
MAG RTN4R  
GSK3B PTK2  
CLU LEP  
RBM11 PCBP1  
ATP2B4DLG3  
C5 C6  
CDH1 ADAM9  
YWHAZ RIN1  
RUNDC3A GFI1B  
PPP2CACCT2  
PLSCR1GLRX3  
F2 PROS1  
NUP155VHL  
FN1 SPARC  
FEN1 EP300  
HRAS RASGRP4  
BID CSNK2A1  
CHRNA2 CRELD2  
NPAS4 ARNT2  
PPP1CCWBP11  
SRC IKBKG  
EIF2S1 MELK  
HERC6 UBQLN2  
UBC BCL2L12  
RPS14 IKBKG  
SLC38A1 CRMP1  
FLNB PSEN2  
CCAR1 IKBKG

DST COL17A1  
UBE2I PNN  
ESR1 TAF1B  
SEPT9 IKBKG  
RND1 PLXNA1  
MED24 BRCA1  
PROS1 C4BPB  
F2 THBD  
CDK1 UBC  
SLC9A3SLC9A3R2  
PRKAB2 BAIAP2L1  
DUT RHOB  
ARRB2 RALGDS  
SLC9A1TESC  
TCF3 EP300  
RBX1 CUL5  
EIF2S3 METAP2  
IL5RA UNC119  
TP53 GTF2H1  
TCEB3B TRAF2  
PBX2 MCRS1  
SRSF2 RNPS1  
UBC SH3RF1  
SIN3A RLIM  
NRD1 CALCA  
EDN2 CMA1  
BRD2 E2F2  
ZNF146 TERF2IP  
DYNLL1 CACNB1  
UBE2L3 RNF19A  
FYN DKKL1  
PDGFB SPARC  
AIP HSP90AA1  
BCAP31 IKBKE  
TP53 SSTR3  
TP53 WRN  
PPFIA1 CEP70  
HSPA1B FNBP1  
VAV1 PTPN22  
EPM2A NFU1

FBLN2 LAMC2  
HIPK2 DAXX  
ADRA1B AP2M1  
COIL PRMT8  
EEF1A1MAD2L1BP  
FYN DDX41  
DSG1 DSC1  
NFYC ARID2  
GTF2E1GTF2B  
RBM39 NCOA6  
AKR1B1 VHL  
MED24 MED28  
FURIN NAGPA  
TFAP2A CASP3  
EZR GABARAPL2  
POLR1D POLR3H  
MATR3 HNRNPK  
TP53 PBK  
ANP32A SET  
AXIN1 RPS27A  
SUMO2 SAE1  
GFAP STAT1  
ATXN1 SGMS1  
RFC5 EEF1A1  
EGFR TPM1  
EGFR CLTA  
ARID4A BRMS1  
PML HHEX  
PFDN6 RPAP3  
DCAF8 GTPBP3  
TRIP13 C11ORF54  
F2 SERPINE2  
PRKAB2 PRKDC  
PAICS GNAS  
GNAQ GRM7  
TCF4 ASCL3  
STAT5A TEK  
GNAQ GRM4  
PSMD8 PAAF1  
USP8 KRT85

MEF2A HDAC5  
SNRNP70 SKP1  
AXIN1 DIXDC1  
FYN GPR63  
DNM1 DYRK1A  
DPEP3 CHD4  
MLH1 PPP3CC  
RBP1 ING1  
PRKCZ PAWR  
PLA2G2A ALOX12  
VAC14 FIG4  
CTNNB1 CSNK2A1  
FYN CSF1R  
BRCA1 ANTXR1  
PFAS BCAR3  
PROP1 CTNNB1  
FYN TSKS  
CDK4 SMC1A  
E2F1 NCOR2  
APBA3 APP  
RAD51 RAD18  
WDR48 NOP10  
YWHAH ESR2  
SOD1 HOXB2  
ESR1 MAPK1  
PIK3R1 AKAP6  
CSNK2A1 SET  
PLCD1 CALM2  
CYP27B1 SRC  
TRIP6 THRAP3  
PKM2 EXOSC5  
DDAH2 TRIP13  
IGF2BP1 FTSJ1  
PIK3CDTNPO2  
PSMF1 PAK7  
RPF1 NDFIP2  
MEN1 IQGAP1  
HGS RPF1  
SERPINA3 CTSG  
ARF6 HDLBP

CAPNS1 DRG1  
SNAPC5 SNAPC1  
THBS1 SCARB2  
GALNT10 MUC7  
RPAP2 UXT  
CTBP1 ELAC2  
APAF1 PPP1CA  
NFKBIE NCOR2  
HSP90AA1 DNAJC7  
APIG2 RPF1  
OGT MGEA5  
CDKN2A DAXX  
HDAC3 HDAC5  
USP19 SLC1A5  
BSG CAV1  
ABCB1 LAPTM4B  
LENG8 TOLLIP  
SLC9A3R1 PLCB1  
MSN CASP8  
ATG12 EPB41L5  
IFNAR1EP300  
PPP1R15A TSN  
OS9 SEL1L  
TSG101 RNF41  
S1PR4 GNAI1  
TNFAIP3 RIPK1  
HSF1 HDAC1  
NDC80 NEK2  
PLK1 CEP97  
FAM46A EGLN2  
NRXN1 MYO16  
PLSCR1ZNF581  
CSTF2 BAG6  
CAPNS1 RUVBL1  
CCDC85B FASTKD5  
STRN3 STRN4  
GRB2 ARHGAP32  
EIF1B PCNA  
SNAPC5 BATF  
NRAS DNAJB1



POLR2C COBRA1  
VSNL1 GF11B  
ATN1 WWP1  
RPRD2 UPF1  
ERBB2 IRS1  
NR3C1 STAT3  
ANXA1 YWHAZ  
UBE2D3 TRIM8  
PRKAR2B NBEA  
TUBG1 TUBB2C  
EPB41 TPT1  
OTUD4 NMD3  
DYNC1LI2 EPB49  
SLC9A3R1 ADRB2  
DMD SNTG2  
FAM134A KIAA1377  
RELB DDX1  
SF3B3 SREK1  
CD63 TSC1  
SNTA1 UBE2V2  
HLA-F LILRB2  
ICAM2 RDX  
UNC119 AAGAB  
NFKBIB POLR1D  
HDAC3 ZNF148  
NUP155 GLE1  
USP12 PHLPP2  
HPRT1 TRAF6  
TP53 KAT2B  
PTPN4 KAT5  
EPHA2 SLA  
TP53 KAT2A  
PRSS1 SERPINB8  
UBE2U SYVN1  
MTOR MLST8  
RASGRF1 NTRK3  
NRP1 SRRM1  
CD48 CD247  
MAGEA11 ILF3  
CLOCK ARNTL2

GTF2H1 MCM2  
NECAB2 NOC4L  
PSMD10 PSMC4  
CDK8 KAT2B  
CHMP2A MITD1  
SUMO2 ARX  
DAND5 PSMC5  
RXRG NCOR2  
SUPT3H MED1  
SDCBP WDR91  
PLK1 TUBA4A  
CYP27B1 CSNK2A1  
RANBP9 USP42  
GAPDH CAMK1  
GTF2H1 GTF2H5  
FCHSD2 CCDC85B  
EIF2B2 EIF2B1  
XRCC2 RAD51L3  
PRSS23 FXR1  
HSP90AB1 NFKB1  
L1CAM PEA15  
PDIA3 CBF3  
MAPK14 PBRM1  
ALOX5 ACTB  
TTI1 C8ORF41  
PIAS1 DNMT3A  
EIF3B EIF3E  
NFAT5 FOXP3  
ENO1 AGTPBP1  
GRB2 ZMYM5  
ESR1 SMAD4  
CTDSPL CDK9  
SNUPN ENO2  
TNFAIP3 LAPTM5  
ADAMTSL4 KRTAP4-12  
C6ORF211 GSTK1  
KRT18 NME7  
CSF2RB SYK  
ZNF24 ZNF192  
ILF2 CDC5L

IQGAP1CLIC5  
TBL1X CORO2A  
TSHR FLNB  
SIX6 GTF2A1L  
HNRNPH1 MAP3K3  
MATR3 MEPCE  
VTN ITGB8  
ATG12 MOV10  
YWHAH CREBBP  
UACA CELSR3  
MCL1 BAD  
PLSCR1PHLDA1  
NRIP1 CEP70  
GATA2 POU2AF1  
GABRA2 MDM2  
TERF1 KPNB1  
RRAS EEF1A1  
MAP4K4 CCDC88A  
TMOD1 TMSB10  
COIL PICK1  
ESR1 HDAC1  
XPOT XPO7  
MCC NPEPPS  
PTN MYCBP  
SMAD1 ZSCAN4  
DYNC1H1 TRAF6  
PRPF3 DPY30  
DDB1 RFWD2  
GPRIN2MDFI  
RFX6 LMO3  
RBFOX2 ELAVL2  
RAP1GAP MLLT4  
MAD2L1 KLHL13  
LCK TUB  
ITGA2BCALR  
ORC1 ORC2  
HSP90AA1 NANOS3  
HSP90AA1 NOS1  
C21ORF58 GRB2  
IKBKE SDS

DHX15 TAF10  
ATF1 CREBBP  
PAK4 YWHAG  
ZNR1 UBE2D4  
FAS C14ORF1  
EIF5 CSNK2A1  
UBE2D3 TRIM55  
UBE2I C18ORF25  
LRP2BPTSC22D4  
RAMP1 CALCRL  
GATA1 LMO2  
ESR1 TDG  
PTPRS FEZ1  
USP11 OTUD1  
EGFR CEND1  
KIT PIK3CG  
RBBP7 CREBBP  
NRIP1 YWHAH  
MED10 MED23  
DAPK1 UNC5A  
CUL4B DCAF6  
AGRP MC3R  
DLGAP1 DLGAP3  
SLC38A1 C7ORF64  
CCL1 CCR8  
PMPCB FXN  
TJP1 OCLN  
E2F3 RYBP  
CDK8 ESR2  
PKN3 ARHGAP10  
XPO1 NXF3  
HSPA5 MAP3K8  
SHC1 PTK2  
CREBBP PLAGL1  
GPANK1 CCDC85B  
BRP44LMAGED1  
DRD2 CALM2  
ROBO2 UBQLN4  
BLZF1 GORASP2  
ESR1 MED21

ASCC2 OLA1  
TFE3 PHB2  
HLA-B CAPZA1  
JUP ARHGDIA  
PLEKHF2 RABAC1  
CDK8 CREBBP  
MCC SEC13  
DVL2 FZD4  
ABL1 PKD1  
ABL1 LRP2  
ACTN4 PTPN11  
SNIP1 ZMYM5  
E2F1 CTDP1  
RFXANK HDAC5  
SMAD4 UHRF2  
ASCC2 CUTC  
HAP1 CBX8  
CDC42 KAT5  
RPS27A ARX  
PDLIM1 VIM  
TSC22D3 HPCAL4  
SRI RUVBL1  
TAF6 TAF9  
CIB2 MYOD1  
SAP30 MXD1  
CRKL CBLB  
PRKACA HNRNPD  
TNFAIP3 KRR1  
YWHAQ RABEP1  
ODF1 SPAG5  
PRKCA CD53  
KRT18 YWHAQ  
ABCA1 PRPF8  
HDAC1 HIF1AN  
QARS TRAF2  
KCNE1 PRKCA  
XRCC5 RFC1  
TRIP13 GLYCTK  
TGIF1 SDAD1  
NCF2 SYTL1

TAF6 RBBP7  
CSN2 PAK1  
IKBKE STRAP  
UBC TGM2  
EPS15 DNMI  
IFNAR1PRMT1  
TIRAP IL1RAP  
RPS27AHDAC6  
RASSF5UBQLN1  
PSMD14 PSMC2  
ATG12 RNMTL1  
GLI3 SMAD1  
RPF1 GGA3  
GLI3 SMAD2  
DSTN ACTG1  
RHOQ PARD6B  
FOXO3 NR1H2  
UBE2E1 RING1  
SETDB1 HIST3H3  
EPB41L1 STARD13  
BCAR1 PKD1  
PSME3 BAP1  
RUNX1 FHL2  
TNF POU2F1  
ARL1 GCC2  
HLA-C CLTC  
FYN HCN2  
ATP1A3 PCBD1  
KCNQ1 TRAF6  
RPS16 IKBKE  
PRKAB2 PRKAG2  
RAB5A RIN2  
GFAP SMAD2  
RFXANK DDOST  
APBB1 WIPF2  
ADD1 PRKCD  
VAPB VAMP2  
KRT18 USP32  
ITGB1 ACTN1  
EGFR UBASH3A

SLC9A3R1 PLCB3  
HIVEP1 SOX10  
AIP AHR  
ULK1 PRKAG1  
ITGA6 ADAM9  
BDNF NANOS3  
NUDT21 SIRT1  
VASP ZYX  
PPARG NCOA2  
TRIM21 CUL1  
UBE2I HIPK3  
RALGAPA2 RALGAPB  
RAP1A APBB1IP  
HLA-F TAP1  
RBL1 SMAD4  
PDX1 PRKDC  
TYROBP TREM1  
POLB WRN  
NSF GABBR1  
PTP4A3 CUL2  
RAF1 SFN  
KAT2B TRRAP  
RAF1 YWHAB  
HPRT1 PRKAB1  
TGFA SNTA1  
SNCA LRRK2  
MDM2 RCN2  
THAP7 TRAF2  
CCNK ATXN1  
BCAS1 DYNLL1  
HNF1A RHPN2  
IPO7 RPL5  
PARK2 UBASH3A  
STAT3 SYK  
TADA2A MYC  
CCNB1 CDKN1A  
LEPROTL1 KLRG1  
C1QA CR1  
PARP1 POU2F1  
MED1 MED28

CNOT1 CNOT2  
USP12 HRH1  
TBX2 CEBPE  
NCR3 CD59  
GRB2 BAZ2A  
CLDN3 CLDN1  
SOS1 ITS2  
RAE1 COPS8  
UBE2I CHMP4B  
NFKBIE TUBB4  
PDXK IKBKE  
PTPRS SETDB1  
CHRM2 GRK5  
BMP1B TRAF6  
KRT36 DNPEP  
POU3F3 SOX11  
TGFB2 TGFBAP1  
STX5 COPS6  
RPS27A APPARGC1A  
CYCS COX4I2  
FOS TMSB10  
TAF1 SOS2  
IKBKE PTRH2  
GAS1 BIRC2  
TRIP6 CATSPER1  
PSMD4 DCLRE1B  
CFL1 PSEN1  
TAF6 TAF12  
GADD45G MED31  
LRP4 DFNB31  
RBBP7 HDAC2  
RACGAP1 MAP3K4  
SRY KPNB1  
TF TFR2  
SMARCA4 YWHAZ  
DNMBPWIPF3  
ACTN4 SLC9A3R2  
WDTC1 MED23  
COPS6 KLHL20  
RPP38 RPP25



AKAP3 SPA17  
ACTG1 PTPRO  
SRSF1 CDC5L  
SNRPB SNRPD3  
PRKAR2A PRKX  
SNRPB SNRPD1  
RPS27A MAPKAPK5  
NME5 DYDC2  
UBE2I KTN1  
CSDA NFYB  
PPP5C CSE1L  
MAP3K6 YWHAG  
APEX1 HIF1A  
YY1 ZNF232  
RGS3 YWHAE  
RPAP3 GPN1  
SRI PSEN2  
ATN1 NR2E1  
APC MACF1  
IFNAR1 GNB2L1  
KIAA0513 WWC1  
HIST1H4I DNTTIP2  
CSF2RA PIK3R1  
SOCS1 RPS27A  
ESR1 ESRRA  
CDK4 MMS19  
FANCMAPITD1  
MEN1 SIN3A  
TAL1 GATA2  
COIL TCEB3B  
ZNF423 USP7  
PRKAR2A SMAD4  
TAL1 GATA3  
STMN1 UBQLN4  
FOXO3 HIF1A  
HSP90AA1 MST1R  
IKBKE CNPY2  
KIT GRB7  
ATN1 NOC2L  
FOS ACTN1

CCT6A MOBKL3  
SMAD9 RANBP9  
SOCS1 GRB2  
DCTN1 RPGR  
RXRB STX18  
APP PSEN1  
MDM2 FEZ1  
XPO1 ELAVL1  
PFKM FHL2  
TMPO GRB2  
BAIAP2SHANK1  
CIAO1 HSPB1  
FYB CBL  
CSR3 HDAC4  
EFNA1 EPHA7  
SRC CD36  
RCC1 TNIK  
VASP LPP  
H3F3B HDAC5  
FER STAT3  
RFC4 ATAD5  
CCDC85B CCDC33  
PRDM1 AES  
SUMO3 PIAS4  
AP2A1 SYT3  
CAP2 YWHAE  
PTK2B TLN1  
ELANE TFPI  
DVL2 C16ORF48  
SPTBN1 CPNE1  
STAT3 PTK2B  
STX17 STX5  
S100A9 GRB2  
PRNP ZNF408  
MTPN TNFRSF10D  
EYA1 SIX2  
HOMER3 TRPC5  
NCK1 RALGPS1  
PRNP NCAM1  
NUP62 PBX2

COL5A2 COL5A1  
EIF3F EIF4G3  
EGFR PIK3R1  
ACTA1 EPS8  
CHEK1 BRCA1  
SOX30 TRAF2  
ERC2 RIMS1  
PFAS PHB2  
DLG4 FZD1  
HNRNPC CSNK1A1  
PRKCA SNAP25  
HTR7 GPRASP1  
VIM PPHLN1  
IFNGR1 STAT4  
APP RNF32  
AP2A2 ATM  
HIPK2 WNK1  
E2F4 KAT2A  
FBXO45 USP11  
HSPB3 SETDB1  
KRT18 DSPP  
INSR DOK1  
ATF2 HMGA1  
IGF1 IDE  
MAPK8 BAD  
SMAD3 ZDHHC4  
ACTR3 ACTR2  
S1PR2 GNA13  
ITGB2 RDX  
ACTA1 DLG1  
IKBKE VDAC3  
MAPK8 ARHGDIA  
TRAF5 ZMYND11  
CTSL1 CUX1  
OTC TOMM20  
SRF CEBPB  
CD81 RNF128  
GRIN2B IL16  
BTBD10 ACIN1  
RPAP3 IKBKG

ATP5J2 NDUFA6  
ATG10 ATG3  
UBE4B CASP6  
UBE4B CASP7  
SRGAP2 MYO1G  
PLCG1 SUV39H2  
EXOC4 PLEKHA5  
NECAP2 GGA2  
NECAP2 GGA1  
NCK1 RPL13  
CHTA GSK3B  
HNRNPA1 HNRNPAB  
APC YWHAG  
SKP1 TBK1  
PIAS1 STAT1  
BCL2L1IKZF3  
NKX3-2SMAD4  
CHTA TAF6  
USO1 NSF  
CCNE1 CDC25A  
SF3A2 CTNNB1  
NFE2L2CREBBP  
SPHKAP SPHK1  
NQO1 HSPA4  
UBE2N CNTN2  
PSMB8 PSMB7  
MED13 TRRAP  
ACVR1 RHOJ  
SKP2 ELF4  
SRF RPS6KA1  
UBE2L6 RNF19B  
MED17 PPARGC1A  
MAP3K3 CCT7  
HDAC2 EZH2  
CDK2 GSTK1  
HNRNPA1 MEPCE  
TGFA RHBDF1  
NGFR IL2  
PON2 RUVBL2  
NR3C1 SMAD3

NFKBIA RPS6KA1  
YWHAQ CDC25C  
GOPC ACCN3  
TP53 CUL7  
XPO1 AICDA  
YWHAQ CDC25A  
LMO3 MBIP  
DNAL4 FHL5  
YWHAQ CDC25B  
TUBB2A RABAC1  
RXRA NCOA1  
TCEA2 SH3GL2  
TP53BP2 BCL2L2  
ERH ILK  
RIPK2 KIF14  
EPM2A PPP1R3C  
YAP1 NFE2  
RHPN1 EFEMP2  
ZNF165 EWSR1  
RPS14 MEPCE  
CCNB1 CDKN1B  
RUNX1T1 GF11  
APP NUMB  
CYP27B1 BAG1  
DPP4 CXCR4  
PPP1CBPTK2  
RFC2 CHD1L  
NFATC4 CREBBP  
GSPT1 HLA-B  
UBE2D3 RNF26  
HSP90AB1 MDH1  
GNAI2 IL8  
CEBPE BATF3  
SOX8 OLIG2  
PCBD1 KLF13  
PSMC4 PSMD6  
FHL2 TRAF6  
RPN2 BRE  
NANOS3 NOSTRIN  
NUMB ITCH

TAF1D HAP1  
KDM1AZMYM3  
TP53 DEC1  
TRIP10 INPP5D  
ZFYVE9 SPG20  
PPP3CBSLC8A3  
SFN ST5  
WIPF1 CRKL  
SNCA IARS  
IKZF1 CTBP1  
RGS12 ITGB1  
PARP1 H3F3B  
RAG1 CRK  
TK2 CDKN1A  
TUBB NFKBIA  
STAU1 MAP3K14  
SREBF1MED12  
EIF3H EIF3E  
RXRA SMAD2  
SMAD1 TTF2  
ERH UNC119  
GRB2 ERFF1  
FAM86A PRTFDC1  
ABL1 MEPE  
CTBP1 HIC1  
PSMD10 TP53  
GMPS SUMO4  
SF3A3 U2AF1  
CALM2 TRPV4  
IPO5 NUP214  
DAZAP2 FAM46B  
PARP1 MYBL2  
MYSM1WDR77  
YWHAZ TUBA1A  
KIT PTPRO  
GLUL GRB2  
AGR2 TAGLN  
WDR3 PDE10A  
MNS1 EWSR1  
MYC MTHFD1L

HSPB1 TSC22D1  
PIK3R1 CDC42  
AP2A1 CLINT1  
CPLX1 VAMP2  
PLCG2 MED28  
SRP14 ATG5  
GIPC1 RGS1  
CUBN GIF  
ZMYM2 RCOR1  
ENO2 IL17B  
YWHAH AKT1S1  
TP53 PTEN  
CFTR RPS27A  
EEF1A1 STMN2  
ASB2 RNF7  
FN1 SCGB1A1  
RB1 ATF2  
SUPT3H MED16  
CTNNB1 CXORF26  
RGS14 RAP1A  
MLH1 COPA  
CDH2 PTPRO  
KIAA1267 NECAB2  
HNRNPK MDM2  
IKBKE RUVBL2  
SERPINA5 COPS6  
PLSCR1 EXD3  
TNFRSF1B TTC35  
TOP2A PIN1  
ABL1 RTN4  
ITGAM AUP1  
KPNB1 FAN1  
GNG7 GNB4  
HIPK2 CHMP4B  
HSPA1L MAP3K1  
SCNN1G AP1M2  
AP2A1 RPS27A  
PARP1 RARA  
FLT3 SH3BP2  
INHBB ACVR2A

ACTN1 ZYX  
AURKABRCA1  
CXCL12 CCR4  
SMARCA4 RCOR1  
MCM6 SCNM1  
POLR3A EWSR1  
TP53 KPNB1  
ZMPSTE24 FTSJ1  
CYP27B1 RXRG  
LMO1 LDB1  
KIT PIK3R1  
AP2A1 GRB2  
MEIS1 HOXD4  
RB1 BNC2  
GOT2 ZDHHC6  
S100P S100A2  
YY1 CDKN2A  
CHGB CFBF  
ATF7IP SVEP1  
HNRNPA1 ILF3  
HNRNPA1 ILF2  
GNAS OPTN  
NFYC ADNP2  
TCEA1 CDK8  
TOP2A HDAC1  
NR4A1 FXYD3  
NFKBIE IKBKG  
CDK4 BRCA1  
MEF2A HDAC9  
EZH2 PIN4  
DLG2 NLGN2  
GRINL1A RBM4B  
MYL6 MOBKL3  
UTRN MARK2  
GRIK2 GRIK5  
MAPK14 USP54  
UBE2H RNF216  
TRPC3 TRPC4  
VAMP7 DNAJC5  
RELB SMARCE1



TLR5 TLR1  
SMAD3 HEYL  
MYC ECT2  
APOA1 LBP  
CSK PTPRJ  
MAPK1 EIF4EBP1  
PAPOLA YWHAE  
MAP3K12 RABEP1  
MAX EPAS1  
PCNA TCOF1  
YWHAG MPRIP  
C1QBP SRSF9  
IKBKE RUVBL1  
EPRS MCC  
UBE2D3 RBCK1  
RAD51 BRE  
CNN1 MYO1A  
PARP1 MYB  
SMAD9 SF3B1  
PCNA TPI1  
COPS5 SAP130  
RPS20 NDRG1  
PFN1 RHOQ  
SCN1A SNTA1  
PDGFRB PDCD6IP  
GRB2 TSXS  
ADA NR3C1  
GRINL1A WDR89  
UBE2D1 RPS27A  
GPR143 GNAI1  
HK2 PRKCE  
USF1 RBBP5  
MCC RAB7A  
HDAC1 UHRF2  
ABL1 SNX12  
CUL4A WDR26  
TNNI1 CCDC85B  
FASLG PACSIN2  
PFKM MAPK3  
NR4A1 CHD4

ESR1 HSPA4  
TOPBP1 RAD9A  
BUB1B ANAPC7  
GIPC1 GEMIN4  
TIMM44 TIMM17A  
ANKRD28 USP21  
SMURF1 MAP3K2  
MYC IQGAP1  
RANBP2 ARX  
ATF7IP PIAS3  
PRKCH USP34  
FOXG1 TLE3  
EIF3D MCC  
SBK1 FCHSD1  
FOXG1 TLE1  
MAPK8 CASP10  
HSPA1B SHC1  
PTPRA PTPRD  
ACTA1 DNMBP  
MCC TFAM  
SCMH1 MAML3  
ABL1 G3BP2  
PPP2R1A RAB18  
MEF2C VGLL4  
PSTPIP1 KIF14  
PSMC4 PRKAB1  
PRKCA CDC42  
RPL35 MAP3K14  
GNAI1 PTPRU  
ATP2A2 CAMK2A  
RAD1 RAD17  
TOM1 CLTC  
RPS9 DSTYK  
CTBP1 EHMT2  
SPOCK2 SPOCK3  
XPO1 SMAD1  
SKIL PSG3  
SUMO2 ZBTB33  
MPDZ HTR2A  
BMPR1B PAK1

DMXL2 WDR7  
APC2 ANAPC11  
ETV6 PIN1  
SMAD1 STUB1  
CSTA CTSH  
PIK3R1 POLR1B  
MUL1 UBE2W  
FEZ1 SCOC  
DSG3 CASP3  
MED21 MED18  
RPS27A BRSK2  
CTSS SERPINB4  
CTSG F2R  
HIPK2 TP63  
DISC1 C14ORF166  
PDLIM4 ZNF408  
VTN PRKCG  
RXRB RAB3GAP1  
GJB3 TJP1  
WWP2 RPS27A  
NFIC TKTL2  
TP53 RCHY1  
VTN SERPINE1  
ITGB4 SREBF2  
TP53 ZNF385A  
ABL1 SRC  
IL17RA TRAF6  
EYA3 SIX2  
LMO2 MLLT4  
RPS27A CCAR1  
TBP DRAP1  
NUAK1 KRT77  
SRC ID4  
SMAD3 HIPK2  
ERBB3 RGS4  
ESR1 POU2F2  
AR PRKDC  
CD81 DLG5  
UBC TNFAIP3  
P2RY2 CD47

RAD21 CDCA5  
ARF6 AIMP1  
MET SOS1  
SUPT3H SF3B3  
DCP1A TTF2  
P4HB YWHAZ  
TOB1 SMAD3  
UBE2K RNF41  
TAF9 HAUS6  
GZMA HMGB2  
MYB PTMS  
EP300 SRCAP  
ZWINT MIS12  
DES TRIM7  
SERPINA1 MMP7  
ABL1 XRCC6  
MAP1LC3C UBA5  
PRKDC RELA  
CDK1 PKMYT1  
RIPK2 VIM  
CDC27 USP11  
KDM1AHDAC2  
CCL5 VCAN  
ATXN1 SETD2  
CCNT2 BRD4  
KDM1ARREB1  
APP PCBD1  
MAP3K14 MYBBP1A  
IDH3B PRMT1  
GRIA1 EPB41L1  
GPR1 GNAI1  
CFL1 TESK2  
ZFYVE9 SMAD3  
CDC42 ARHGAP44  
CD7 PI4K2A  
HNRNPH3 SUMO1  
HUS1 FEN1  
MARCH6 PPARG  
CD44 SLC7A11  
TNFRSF10B MADD

GAPDH RPA2  
PSMB2 TRAF6  
C20ORF27 RALYL  
TLR3 IRAK2  
MEPCE IGF2BP2  
SMARCA4 NEUROG2  
LAMA5 SV2A  
USP8 KIF23  
FAS UBA7  
PLCG1 MTUS2  
DVL2 SNIP1  
SMAD9 PSMD8  
NUDT21 MYL6  
MYB FBXW5  
WDR48 ZNF639  
SMAD7 STAMBP  
ATG12 MAP1B  
SUN1 TSNAX  
NUTF2 LUC7L2  
CASQ2 ANKRD1  
SMAD7 ZBTB11  
GRAP2 GNB2L1  
EIF2S2 EIF2B5  
CAST CRK  
NXT2 NXF1  
CCND1 PPP1CB  
PRKCG GPRIN1  
HMGB1 NFKB1  
S100A10 SETDB1  
QKI THAP1  
PGR PRDM2  
HDAC4 YWHAE  
PPP1R8 SF3A2  
RAC1 FAM70A  
CCDC85B C10RF65  
YWHAQ KLC4  
BCR GAB2  
MAPT YWHAB  
MCF2 RHOA  
GFI1B DTNA

ADRA1B        PPP1R9B  
BCR    MLLT4  
NKX3-2HDAC1  
LMO2   STAT1  
CBL    BLK  
TTF1   KAT2B  
IGF1   IGFBP4  
PRMT5   NCL  
IRAK1   PRKCZ  
GRINL1A        SCMH1  
RFC5    INSL6  
RSRC1   ACTR3B  
KCNH4   ID1  
BTAF1   MVD  
PLN    DMPK  
ACTB    CARM1  
ARRB2   CLTC  
KRT15   USP2  
CCND1   CALM2  
HAX1    KIAA0513  
RPA1    BRIP1  
PRLR    GTF3A  
KDM5CREST  
PTPN6   BTLA  
EPB41   NUMA1  
PTP4A3   CLPX  
CDC42   MYO9A  
RPS27A   SIAH1  
AGT    AGTR2  
PIK3R1   GTF2H1  
GNB1    DISC1  
RPS15A   SLC7A9  
PRPF4   TGFBR1  
COPS6   FBXO7  
NUDT18        TRAF2  
IL13    IL13RA2  
DVL2    VANGL1  
PTK2B   GIT1  
MAP4K3        HIPK3  
MDM2    TSNAX

ZFYVE9        TGFBR2  
HSPA5 PSME3  
CEP290 GRB2  
WWP2 IL6R  
NCOR1 BAZ1A  
FARS2 USP45  
CUL3 COPS6  
IKBKE PTGES3  
UBAP2 ITCH  
RPS11 IKBKE  
SSX1 LHX4  
PANK2 QRICH2  
SMAD1 IRF2BP1  
MECOM        KAT2B  
ACTA1 SMARCB1  
YWHAZ        PANK2  
ATF6 SREBF2  
SPDEF NKX3-1  
SCAMP2       SLC9A7  
HRAS AGTR1  
PEX19 PMP22  
ADRBK1       PDCL  
CTTNBP2NL   ZRANB1  
PCBD1 DYRK1B  
SOCS5 EGFR  
DLEU1 EEF1A1  
LPA CANX  
F2 GP1BA  
IL18RAP       CD48  
RALA PPP2R1B  
ATXN7L3       SECISBP2  
ATP1A1        MAPK3  
PVR TJP1  
PARP1 TRAF2  
XPA GTF2H1  
EIF2S2 PLEKHM1  
DAND5 BCOR  
PRLHR PRLH  
ABL1 CENPA  
PPP2R1A       NFKB2

BLOC1S2 DTNBP1  
GFM1 TRIM55  
PTPN2 UCHL5  
F8 MCFD2  
RNASEH2A APLP2  
SOD3 FBLN5  
CCNE2 CDK2  
INSR FRS2  
CAPN1 GNG12  
IL19 IL20RA  
TGFB1 PARD6A  
EZH2 NINL  
RXRA ZNHIT3  
RXRA MED1  
QKI RBFOX1  
HAX1 DGKD  
SMARCA4 HSF4  
PIM1 SND1  
ITGB1 CD81  
SPI1 NFYA  
FLNB PSEN1  
ACE AGTR2  
SRP72 SKIL  
AR GTF2F2  
RXRA TRIP10  
CASP6 PRKCZ  
RXRA JMJD1C  
USO1 GOLGB1  
RXRA TRIP4  
APP PSEN2  
SLC3A2GSTK1  
HMOX2GIT1  
XIAP MAGED1  
APC SMC3  
HLA-B CRK  
FASLG SUMO1  
PDS5A AKTIP  
HCK RUFY1  
RAD23A RPS27A  
USO1 CASP8



DLG4 SHANK2  
NAA11 NAA15  
LTA TNFRSF1B  
MYOD1ID1  
ZBTB16THNSL2  
PPP1CABAD  
PRRC2A MAN2C1  
GRB2 PNMA2  
PRMT5 POLR2C  
PPFIA2 CAST  
KDM5CCBX3  
BVES PYCARD  
APP GSK3B  
FBXL15RAB40C  
BCL10 CASP9  
FIBP GEMIN4  
LIN7A MPP5  
PTBP1 CALCOCO2  
MYC TAF12  
GRB2 HCN2  
CREBBP HIPK2  
TP53 ZNF225  
SMAD3 SPTBN1  
PAN2 CCT7  
KPNB1 TRAF6  
CUL4A WDR76  
PSMF1 PDLIM7  
SELE ACTN2  
OS9 MEP1B  
PIAS1 SKIL  
TRIM5 BTBD1  
SUPT3H TAF9  
CUL4B DCAF4  
PSMC4 UCHL5  
PDE6D RAD23A  
STK3 ATG4B  
SAP30 CIR1  
RBM8A IKBKG  
RBM10 MYSM1  
GRIN2D NANOS1

PRPF6 PHLDA3  
GH1 GSTM3  
SMARCA4 ZMYND8  
FGF6 FGFR2  
HOXA1 TRIP6  
ACTB VSNL1  
ABL1 CABLES2  
RPS27AIRF8  
DAP SETDB1  
PRKAR2A KCNQ1  
HSPA4L ARF6  
TLR4 TIRAP  
SUMO1 PARK7  
TRAF2 APEX2  
UBE2D2 BTRC  
SMAD1 OAZ3  
CIAO1 MLF2  
PTPRG MAPK3  
ACTA1 HDAC8  
PKD1 PTK2  
STAT3 KHDRBS1  
HCLS1 CSNK2A1  
NPHP1 FLNC  
TLX3 TLE2  
TLX3 TLE1  
NFYC KIAA0240  
SFN RAE1  
SUMO4 ACO2  
CNP TRAF6  
RANBP2 SAE1  
PPP2R1B AKAP9  
DFNA5 PTN  
DMD KCNJ12  
CCNA2 RBL2  
PCBP3 ARF6  
AKAP8 CCND1  
SMAD5 MBD1  
KBTBD7 GABARAPL1  
ITGA5 CTGF  
ZNF24 SETDB1

MOBKL3 TRAF3IP3  
FBN1 FBLN2  
EIF1B AHCY  
TNF DCN  
CSNK2A1 WDR48  
ZEB2 RBBP7  
IGF1R EHD1  
CSF2RB YWHAZ  
FLNB RANBP2  
PTK2 SORBS1  
EGLN2 HIF3A  
WNK1 FAM53C  
CCL2 MCM3  
WNK1 FAM13B  
DAND5 PHC2  
ERBB4 NRG4  
NCOR1 RUNX1T1  
MAGEB2 FUS  
MYC TH  
RAB6A BICD1  
ZNF24 R3HDM1  
MOBKL3 FGFR1OP2  
RXRA NFKBIB  
NR3C1 LCK  
ASAP2 TBRG4  
USP4 TP53BP2  
MEPCE HNRNPAB  
KCNE1 KCNH2  
TLR4 TLR1  
PSPH ERH  
PSMC4 USP14  
CD22 AP2M1  
KRT20 ABI2  
PSTPIP1 ABL1  
POLR1A NOLC1  
SERPINB2 PSMB1  
WWP2 VASP  
RARA NPAS2  
IKBKG NFKB2  
ARNT NCOA1

HNRNPAB POLR1E  
FOXK1 FYCO1  
PXN NDEL1  
NR3C1 FYN  
MATR3 TTF2  
AKT1 COMMD1  
DDR1 BEND5  
PARP1 GZMB  
RPF1 SMAD3  
HOXC11 STAT3  
FYN CENPA  
ENO2 ANXA11  
DMRTB1 EWSR1  
ABCA1 DLG2  
USP19 ACADSB  
HNF1A DYRK1B  
RAB27B UNC13D  
DMD DISC1  
ELAVL1 CARM1  
MAPK14 MKNK2  
BAG2 TAB2  
SNCA MAPK8IP1  
HBM FZD8  
MCM5 HIST1H4I  
FOS SUMO4  
CCL1 HUWE1  
RBM25 RAC1  
MPG MOBKL1B  
SLC31A2 RAMP3  
AKAP3 AKAP4  
SLC31A2 RAMP1  
SLC31A2 RAMP2  
CCR3 CCL28  
NPHP1 PTK2B  
TRAF3 TRAF3IP3  
GBAS HADHA  
CAP2 PSPH  
BRPF1 ING5  
LPL CALR  
CCL2 ORC2

PAK3 ARHGEF6  
ZAP70 PTK2B  
BUB3 TNIK  
UBC BRAF  
RAB3B SMAD1  
CCDC112 C1ORF190  
MTNR1B ITM2C  
RPL18 MAP3K1  
PNKP KRTAP4-12  
HMOX2MED31  
CRX EP300  
SMARCA4 ADNP  
GADD45G PTPRK  
ZBTB43TRAF2  
GADD45G PLEKHM1  
SRP14 NSFL1C  
ILF3 RPAP1  
AKT1 CAMKK1  
TNIP1 RNF11  
SMAD9 KDM6A  
EZH2 KLHDC2  
C9 C8A  
CREB1 AKT1  
KCNK3 COPB1  
IFNG PDIA3  
PCNA HDAC1  
MAP3K7 RANBP9  
WDR48 GPN3  
ETS1 GNAS  
GRB2 VAV3  
PSMC4 TRAF6  
RAB6A CHM  
TP53 PRAM1  
EEF2K RPS6KB1  
PPM1B RASGRP1  
RELA ARHGAP21  
PARK2 NDUFA4L2  
TCF21 APEX1  
TCERG1 HNRNPU  
LMO4 ITSNI

ERCC2 RAD52  
RBL1 BRCA1  
RGS12 HRAS  
TIMM50 MAP3K14  
EWSR1 BAD  
PIK3CDASCC2  
TXNRD1 GLRX2  
PTEN UBE2L3  
HLA-G SEC14L3  
HLA-G TAP1  
PRPF40A FMNL1  
PRKCD PPAPDC2  
SUPT3H TRRAP  
ID2 INSL6  
HCN1 HCN3  
RB1 E2F4  
PCBD1 ZNF451  
ANAPC1 RPAP3  
MEPCE SNRNP27  
SIVA1 ABL2  
MAPK1 FHL3  
RXRB PCSK6  
PPP2R1A SGOL1  
CD2BP2 SNRPB  
KRT9 MDM2  
ETV1 RPS6KA1  
CLSTN1 BAHCC1  
GH1 NPEPPS  
XPO1 RPS6KB1  
IL2RG GRB2  
C10ORF12 EWSR1  
MMS19 BRF2  
IL2RG RPS27A  
MLLT4 RIT1  
GRB2 BRPF3  
RAB27A C7ORF64  
EGFR BTC  
SREBF1MED15  
CTBP1 LCOR  
BUB3 APC

ARCNI PAN2  
SCMH1 UBQLN4  
PGRMC1 SCAP  
HIST1H1A NAP1L4  
CENPA ZC3H13  
CBX3 L3MBTL1  
ELF3 KRTAP11-1  
NDRG1 AP2M1  
TRPM7 TRPM6  
STXBP3 GEMIN4  
ITGB2 CD226  
TBC1D4 PIN1  
TNFRSF14 RNMTL1  
H3F3B ASH1L  
MED21 PPARGC1A  
RPL35ACNBP  
NECAB2 GTPBP10  
PCBD1 PRRC2C  
RGS2 GDE1  
PRPF40A HNRNPF  
GRB2 SHC4  
SDPR PRKCDBP  
CREB1 KIAA2018  
PPP1CBPPP1R12C  
SNCG MAPK8  
BAG2 PSMC4  
HCFC1 HDAC1  
GTF2B CTBP1  
GUSB CES2  
BMI1 KAT5  
ATF7IP GMEB1  
FGFR1 PIK3R1  
NT5E AFF1  
PITX3 SFPQ  
CRYAACRYGC  
FN1 IGFBP3  
PPARA STAC3  
HIST1H1E L3MBTL1  
TTK CDC16  
YWHAZ PARD6B

RELA TLE1  
SMAD3 EIF4ENIF1  
SNRPD3 SF3A2  
GOLGA2 AKAP9  
MOBK1B TRAF6  
DTX1 ITCH  
CDC5L PCBD2  
YWHAQ UBQLN4  
SERPINB9 IGSF21  
CTNNA1 SPTBN1  
JAK1 JAKMIP1  
SPTBN1 MAP3K3  
COL1A1 P4HB  
SMAD9 BTG2  
KDM1AZNF516  
MYC NUP93  
FYN RIN3  
MYCL1 MAX  
UBE2D1 RNF181  
TCEB1 SOCS4  
SUMO2 GATAD2B  
USP2 MDM2  
TNFRSF10B CFLAR  
MAGEA11 SPRYD5  
EPS15 GRB2  
TGFB1 TGFB2  
FCER1A MS4A2  
FFAR1 GNAQ  
CEP70 C16ORF48  
EPS15 RPS27A  
CUL1 COPS4  
CD3D CD247  
RAC1 DMPK  
FGFR1OP PPP2CA  
PIK3CGBECN1  
RPS27ACCDC50  
KRT18 YWHAB  
UBE2I TRAF4  
PTPRS MOBKL3  
WDR11 GABARAPL1



LRCH2 RPAP3  
ZBTB16HEATR2  
G3BP1 ATXN2L  
PTPN12 SMAD5  
UBE4B VCP  
MYD88 STAP2  
COPS6 VPRBP  
MRPS12 INSL6  
YWHAG CDK17  
MECOM CREBBP  
YWHAG CDK16  
DIO2 WSB1  
STMN1 VHL  
SOCS7 ABI1  
HSPA1B SUMO4  
AXIN1 PPP2CB  
MEN1 NFKB1  
MAP3K3 STUB1  
ZAP70 PAG1  
SHC1 GAB2  
GOT2 CCNA1  
GH1 PSMA3  
ARNT SENP6  
REG3A TRHDE  
EPB41 PSMB3  
TPM2 PDLIM7  
FAS CRMP1  
TAF5L KAT2A  
TAF5L KAT2B  
FGF18 FGFR3  
FANCA PIK3R1  
CNOT4 UBE2W  
ATF2 RNASEH2A  
H3F3B BPTF  
NOVA1 SMARCC2  
ACP1 IKBKE  
ANXA7 S100A10  
GABARAP MLH1  
TRIM21 SKP2  
TPM3 MCC

GTF2B REST  
MAG COL9A3  
IKBKB PARP1  
AEBP2 SETD8  
APP SLC40A1  
MAG COL9A2  
NUP214XPO5  
HDAC1 PHF12  
VIM PSMD7  
NBN H2AFX  
PMCH MCHR1  
AHR PTGES3  
GORASP2 TMED3  
MAPK6 SLC27A2  
ITGA5 PAK2  
EZH2 PIN4  
VAMP7 AGFG1  
PGR ZBTB17  
MYB FBXW7  
GORASP2 TSC22D4  
FPR2 CAMP  
HBEGF BAG1  
LONP2 MAP3K5  
SETD1A UQCC  
AP2A2 ATR  
CCND3 PPP1CB  
TPR NUP93  
FRK PTEN  
CCT4 MEPCE  
TIE1 SUMO1  
COL1A1 CAPN1  
MUC1 PRKCD  
BIN1 SH3GLB1  
FLNA GRM5  
HNRNPA1 SREK1  
NEK2 PPP1CA  
HMGB1 TFE3  
AGR2 POM121  
ESR1 COBRA1  
DDB1 FBXW5

PPP1CABCL2L2  
PAK2 DST  
MGEA5 RNF32  
UFM1 UBE2W  
IL6 OSM  
SYNCRIP EPRS  
H3F3B DHRS12  
CFLAR BCL2L1  
NSF VT11B  
SPTBN1 RINT1  
TRPC4 TRPC6  
PI3 LOR  
MCC SSRP1  
CALR TNFRSF10D  
TMEM66 SNX15  
TK2 CCDC90B  
PEX14 PEX5  
NCL H3F3B  
CTSE BAG6  
EXOSC6 XRN1  
DLEU1 TUBB2A  
SOCS1 JAK1  
ESR1 EP300  
FOXO1 CREBBP  
ABL1 ASAP1  
ZNF76 EP300  
NF2 CUL4A  
GRB2 ASAP1  
SF3A2 PRCC  
RHOD ACVR1  
FAM115A EFEMP2  
NAA50 TRAF6  
STX7 VPS18  
WDR4 METTL1  
RPAP3 TELO2  
CDC27 NEK2  
LTBR TRAF4  
GRB2 KIF26A  
AHR NCOA2  
ITGB2 FCER2

POLRMT TFB1M  
HCLS1 ACTA1  
GSN ACTG1  
ESR1 CITED1  
LDOC1 KRT18  
YWHAQ DISC1  
PLCG2 GRB2  
TUBB4 SLC7A9  
ICA1 KRT33B  
ILF3 SF3A2  
MCC SOAT1  
AGR2 CCDC90B  
RBBP8 BARD1  
TLE1 RNF10  
MCM7 CCNH  
PPP1R15A KIF3A  
IL2RB CISH  
OTUD7B CCDC50  
MCM7 MNAT1  
RWDD2B DDX19B  
WIPF1 GRB2  
SGK1 ATP5D  
MYOD1CDKN1C  
CLN3 COX15  
PRDX3 MUC7  
PCCB CSNK2B  
PIAS1 NIN  
RRAS ZHX2  
SGPP1 S1PR5  
BIRC5 USF2  
WNK1 TXLNG  
PIAS2 GLUL  
ORC4 MCM7  
EDNRB GRK6  
TAF5 TAF8  
ARIH2 UGP2  
RASSF2RASSF5  
MDM2 TMEM87A  
RING1 USP7  
FBN1 HSPG2

IRF3 PIAS4  
RALA REPS1  
EXOSC6 DCP1B  
GNG2 BTK  
ARRB2 MDM2  
NFKB1 PPP4C  
VCAN CCL8  
MAPK8 MAP1B  
PTEN CSNK2A1  
EWSR1 EZH2  
HAP1 C8ORF33  
CDK16 SEC23A  
ZNF83 PAK1  
TCERG1 FMNL1  
AP1B1 CREBBP  
EGF ERBB3  
ARF6 NCAPG  
SSBP2 EWSR1  
MYBL2 RBL1  
MYOD1MEF2C  
NCOR1 RBPJ  
PIAS2 AKT1  
DLST CCDC86  
MSL3 MYST1  
CBX5 HIST1H3J  
GRM5 GPRASP1  
YWHAG MSL2  
TP53 ERCC2  
TP53 MAPK10  
CAMK2N2 ARHGAP32  
NANOS3 PPP2R5A  
IFIT3 LONP1  
ESR1 MMS19  
EPB41 SAR1A  
EFNA3 EPHA4  
IRF6 TLX2  
SSSCA1ALS2CR11  
FHL2 CARD8  
FLNA FILIP1  
ASAP2 PLCG1

CCDC85B TCEANC  
TADA3 ADPGK  
SMARCA4 SMARCB1  
NQO2 RELB  
NDUFV3 PHYHIP  
PHLPP1MARK2  
EIF2S1 EIF2B1  
YWHAE ARHGEF2  
NUAK1 PRPSAP1  
ZBTB25ZBTB1  
GRPEL1 PRKAB1  
PITPNANEO1  
ABCG8 ABCG5  
ESR1 BAG1  
LGALS3 LGALS3BP  
CDK9 RBBP7  
KIF2A MYB  
MAGEA11 EWSR1  
PLA2G15 RNF7  
GRB2 CBLC  
PIK3CANEDD9  
CYTH3 CNKSR1  
GRB2 ALK  
APBA1 LIN7C  
RXRA CTNNB1  
AHR TAF7  
CDKN1A POLD2  
LYN PPP1R8  
PTPRCAP EEF1A1  
EEF1D CTBP1  
HDAC3 SREBF2  
SGCA SGCD  
DZIP3 TSG101  
POLR2E POLR2B  
ERC2 BSN  
CSF2RB GNB2L1  
ESR1 SMAD3  
PF4 SRGN  
YWHAE TAZ  
GRB2 TPX2

IRF1 STAT1  
MSX1 LHX2  
CNKSR2 TNIK  
PRDX1 PRDX4  
TUBA4B IKBKG  
ITGA5 ILK  
YWHAH ADAM22  
PIAS2 KCNH4  
TFE3 FSCN1  
FAM124A ZNF165  
BMP2 GREM2  
PPM1A SMAD3  
IL12RB1 IL12RB2  
S100B GFAP  
VAMP1 STX1A  
ABL1 BRPF3  
MYC PPP1R2  
KCNE1 KCNQ1  
CXCR4 PTK2  
NCF2 RAC1  
JAK2 KIT  
IPO7 HIF0  
CALM2 CAMK2A  
CDK14 TGFBR1  
RAB27A MYO5A  
ADRB2 SRC  
SMAD1 ICK  
MEPCE YTHDF2  
TFCP2 MAPK14  
PCNA CHAF1A  
PAG1 GLS2  
CYLD TRAF6  
COPS2 INGX  
USP7 KLHL8  
RAD17 NHP2L1  
AGTR1 AGTRAP  
MTA2 PCNT  
ESR1 SIN3A  
HPRT1 GABARAPL2  
HDAC4 HDAC7

UBE2I CBLC  
KIT PTPRU  
FLNA GRM7  
FLNA GRM4  
ZMYM6 FOS  
INSR PTPRO  
NCOA1 FOXA2  
UBA1 RPF1  
ZMYM6 KLHL13  
RPS6KA5 TH  
YWHAB SH3BP5L  
PROC PROCR  
HSP90AB1 STAT3  
CDKN1A CREBBP  
TAP1 MDFI  
DAP3 ESR2  
YWHAZ CRTC2  
HLA-DQA1 TLE1  
NUTF2 RAN  
PDGFRA STAT1  
RNPS1 SRRM1  
PDGFRA STAT5A  
PRKCB BTK  
FZD9 WNT7A  
UBE2K RNF167  
GFI1B PDZD4  
EED PPP1R8  
YAP1 TEAD3  
EGFR STAT5A  
SYNCRIP APOBEC1  
ETF1 IKBKE  
CBX4 UBE2I  
HDAC1 PRDM5  
NBR1 FEZ1  
ERH ACP6  
PEX1 PEX6  
EXOSC6 CHPF  
EPS15 SLC6A3  
APCS C1QA  
CDH5 PTPN11



CHMP2B VPS24  
CDKN1A HDAC2  
SYN1 KAT5  
CTNNB1 FOXO4  
DCTN2 BICD1  
ID2 PAX8  
EGFR TJP1  
APCS FN1  
OLFM2 SRSF5  
ADRA1D FLNC  
CTTN ASAP1  
ETV6 SIN3A  
CRYBA2 CALCOCO1  
CTNNB1 PKD1  
CSNK2A1 ACACA  
FRS3 NTRK1  
CHGB MOGS  
AKT1 TSC2  
PFKL TAF10  
ARHGDIB CDC42  
CTNNB1 LRP2  
MYB CREBBP  
GTF2B IKZF1  
DMD SNTG1  
ETF1 KEAP1  
PPP1R15A BAG1  
PDGFRB BAG1  
MYO1CEMD  
GRIA2 PICK1  
HNRNPU NDRG1  
ELK3 MAPK8  
ELK3 MAPK9  
KDM5DPCGF6  
PFKL TRAF2  
YWHAE TAF9  
CTNNB1 CTNND2  
XRCC6 APEX1  
MTOR MAPKAP1  
ENG TGFBR2  
DLG4 FZD4

CRYBA1 CRYBB3  
MAPK1 GRB10  
MRFAP1L1 TSNAX  
NR3C1 ZBTB9  
PZP CPB2  
AGR2 MED31  
CLTB CSNK2A2  
PRKACA AKIP1  
PEX7 PEX14  
FYN PRKCD  
APC YWHAQ  
STMN1 PINX1  
MEPCE LSM4  
PARP10 WNK1  
RPL11 BLMH  
YWHAE BAD  
SETDB1 ZFP64  
GPRASP1 C8ORF33  
BIRC5 EVI5  
ABL1 FAM110A  
ESR1 USF1  
THRB CTCF  
UBE2I ZHX1  
CALB1 RANBP9  
TRAF3 USP7  
FYB FYN  
DDIT3 CEBPG  
HLA-B RANGAP1  
BAG3 AMOT  
PHF7 IKBKG  
PTK2B MAP3K4  
IL16 KCNJ15  
RELA UXT  
SMAD3 SAP130  
RNF8 MCPH1  
SYT1 C6ORF15  
RPS6KA1 METTL1  
GH1 RANBP1  
AXIN1 PPP2CA  
EGFR STAT1

PTPN13 RAPGEF6  
NFKB1 MTPN  
TSG101 NT5DC2  
NRIP1 ESRRB  
CDH5 PARD6A  
HIST1H1C KPNB1  
HDAC7 NCOR2  
RXRA NR4A2  
PRKCB PTPN11  
CCDC92 PLEKHA5  
UBE2N TRIM5  
CLIP1 MAPRE1  
MAPK1 PPP2R5C  
MFNG NOTCH2  
CUL4A COPS7B  
DENR RPS27A  
GNAI1 WASF1  
MLL MTM1  
SLC9A1MAP2K2  
CCT3 VAV2  
RND2 UBXN11  
ASPH TRDN  
RXRA MAPK1  
KLHL22 KLHL13  
CUL2 COPS3  
SNTB2 MARK2  
TXN APEX1  
UBE2D3 BFAR  
HIVEP2 RAC3  
TRAF5 TRAF3IP2  
KAT2B DDX17  
PLCG1 INPP5D  
SART3 MEPCE  
NPM1 PLK1  
TUBB4 Bmpr2  
AKT1 MTOR  
UBE2R2 DTX3L  
MOBK13 RAPGEF2  
EIF1B DSTN  
MTM1 KBTBD7

ARHGEF9 SMURF1  
MOBKL3 PLEKHM1  
TP73 NFYC  
THRB TRIP13  
USP6 MDFI  
MYOD1RUNX1  
STXBP1 STX4  
THRB TRIP10  
RELA REL  
IDH3B ATXN2  
SQSTM1 GTF3C3  
THRB MED1  
THRB ZNHIT3  
IKBKE KIAA1967  
XPA XAB2  
ASMTL TDO2  
LGI1 ADAM22  
FTCD TNKS2  
ERC2 UNC13A  
YWHAQ PAK6  
THRB TRIP4  
ATAD5 RAD9A  
RAI1 LZTR1  
ACAN ADAMTS5  
SUPT5H C9ORF78  
THRB TRIP6  
THRB JMJD1C  
THRB HMGN3  
GPBP1L1 EWSR1  
BCR YWHAB  
BCR SFN  
CCDC85B LRDD  
WBP4 CPSF6  
GADD45A CDAN1  
C1QBP TRAF1  
ITGB2 SYK  
U2AF2 CPSF7  
COPB1 COPG2  
PTPRC PRKCSH  
MAP1B PRKAG2

BCOR RNF2  
RPAP1 ARHGAP23  
APEX1 ARF6  
AKT1 GSK3B  
TRIP13 PLK3  
MED14 SREBF1  
HOXC8 SMAD4  
AKT1 GSK3A  
SNIP1 FAF1  
EGFR CD82  
RAB7A PRKAB1  
VPS18 STX8  
SUMO1 C5ORF42  
RILP RAB34  
NAA10 MTA1  
IRS1 PTPN11  
CCNE1 CDKN1A  
NFKBIA CALM2  
A2M CYP2C18  
HOXC9 PCGF2  
RUNX1 PAX5  
EIF2S2 UNC119  
DDX10 G3BP2  
TRIM21 YWHAZ  
SLC4A7 SLC4A5  
ICAM1 EZR  
LDOC1 MYC  
CIAO1 GOLM1  
ABL1 HCN2  
AR PIAS4  
MAGEA11 MXD3  
POP7 RPP40  
APC RASAL3  
SMAD3 WWP1  
KRT31 DNPEP  
XPA GPN1  
STAU1 MYH1  
CALM2 EWSR1  
RPAP1 MAGED2  
TGFB1 KLHL1

AR RNF4  
PGR FKBP5  
RB1 MYOD1  
PHC2 TMEM70  
SCNN1G SCNN1D  
ITPKB PSME3  
PPP3R1 NFATC2  
KHDRBS1 STUB1  
TRIM24GTF2E1  
PTPRC PPFIBP2  
UBC SENP3  
CCNE1 CCT4  
ESR1 MED12  
EFNB2 HOMER1  
GEMIN4 BRF2  
RRAS2 SMURF2  
SRPK2 SRSF2  
SOX8 NR5A1  
EPHB2 KSR1  
BZW1 PREX1  
UBE2I ZNF777  
NAP1L5 LUC7L2  
RRAD CALM2  
JAK1 ELP2  
TOP2A CDC5L  
ACTB MYO18B  
CBX4 RB1  
GLUD1 HIST1H2AE  
PIGF PIGG  
KHDRBS1 PACSIN2  
USP46 PPP1R9B  
RELA MST1R  
SF3A2 DDX17  
ENO2 HSF1  
SMEK2 PPP4R2  
HNRNPH3 C14ORF1  
TRIP10 CREBBP  
TRADD HIPK2  
PSMD1 NFKB2  
SHBG CLEC4G

UBE2D3 RNF126  
NR1I2 ACTN2  
ADAM23 YWHAZ  
ANKRD11 NCOA3  
RBFOX2 TOLLIP  
PLCG1 AGTR1  
AKR1C3 INSL6  
SMAD9 SECISBP2  
ETFA CDC42  
STX1B VAMP2  
PRKCA PRKG1  
CTNNB1 BOC  
SMAD9 ZNF587  
COL4A5 COL4A6  
DCD MDM2  
FLII LGALS12  
CXCL3 CXCR1  
CXCL3 CXCR2  
JPH3 STK24  
DAND5 ESRRG  
MEPCE USP15  
NDC80 MIS12  
SNRPF GEMIN5  
EP300 CARM1  
PPP1CARYR2  
ADCK3 RABAC1  
AKT1 CARHSP1  
CYP1B1 SAE1  
HSPA5 HTR3A  
LHB GNAS  
FURIN MST1R  
HCLS1 ZBTB25  
PGR TAF1B  
PRSS2 BPI  
UBE2D3 UBE3A  
SLC2A4PDIA6  
TGFB1 RHOA  
PRL PPIB  
ESR1 PRMT1  
PLCG1 AXL

CTNNB1 PTPRJ  
MYC NOL11  
SS18L1 HDAC2  
MRPS34 NFKBIL1  
GRB10 GIGYF2  
A2M CDC42  
UBE2E1 RNF185  
RPS27AFANCI  
DLX1 SMAD4  
GMNN CDT1  
NAE1 UBQLN4  
CDC5L DISC1  
ADRBK1 SNCA  
TPM3 CNN1  
MAP3K11 KIF17  
TBP TAF7L  
NPPA NPR2  
PLSCR1CCDC33  
EFNB2 PDZRN3  
NUP62 KPNA1  
VIPR1 GNAI1  
EFTUD2 GPN1  
TNFRSF1B MYLK2  
CTNNB1 PTPN13  
SUPT5H ZBTB3  
EPB41 TUFM  
PQBP1 EEF1A1  
TSG101 VPS37B  
HIP1R CTTN  
SLC2A4ACOX1  
POLR3A POLR3D  
EIF3D GRB2  
PDGFB LRP1  
RAD23A TRAF2  
CTNNB1 TRAF2  
GDI1 FBXO11  
APOH GRB2  
PPP1CASTAM  
FOS PKP2  
LMAN1 SNX9



ALDOATGM2  
UBE2N HLTf  
ARF6 PFDN2  
NR4A1 RPS6KA6  
ABCD4 XRCC6  
PANK2 DHX36  
CEP76 KIAA1279  
WWP2 SCNN1A  
TKT IKBKE  
CBL STAT5B  
ATG4A MAP1LC3B  
ESR1 NR1H4  
CTNNB1 TNRC6B  
PIN1 TRAF2  
SVIP UFD1L  
GTF2B NR5A1  
FOS COBRA1  
PPP1CARRP1  
SHC1 CSF2RB  
PTPN1 PTK2  
HCRTR2 CD200  
ATN1 SIAH1  
LAMB2 MAPK14  
ALPL EIF4A2  
RNF8 UBE2D2  
KHSRP A1CF  
ENAH XPO6  
CALM2 GP6  
COL1A2 CD44  
GPS2 PBK  
PAX2 MAPK8IP1  
EWSR1 ILK  
TCERG1 FANCC  
PPP1CAKANK1  
PPP2R1B RELA  
U2AF1 SRPK1  
UNG RPS27A  
IKBKE PCBP1  
PSMB4 HLA-B  
ARF6 IPO11

TLR4 TOLLIP  
VAV2 RHOG  
CPSF7 EWSR1  
DLGAP1 GRIN2A  
POLR1C CD3EAP  
RIC8A UBQLN4  
PAX2 BBS7  
PRKAG2 PRKAB1  
KCNJ4 IL16  
SCO2 MAP3K3  
TOLLIPMAGED1  
CHMP4B VPS4A  
CCDC85B MEAF6  
APC GIGYF2  
MAPK3 SPIB  
UBE2I EP300  
NRAS ARHGAP4  
PHACTR2 PIK3R1  
RPS9 PSPH  
FN1 NFYC  
TP53 PPP4C  
EWSR1 CREBBP  
ARF6 TRMT112  
EPHA8 PIK3CG  
AKT1 SMAD2  
TBP NCOA6  
NOTCH1 FBXW7  
PPP1R1B DLGAP4  
CBL ITCH  
HNRNPA1 PRMT1  
DFFA EFTUD2  
CD3E TOP2B  
HSPA2 RFWD2  
ERBB3 TENC1  
GC ACTA2  
MED21 MED10  
POLR2C TCEA1  
MAP3K3 MYO6  
F10 TFPI  
PARP1 FOXO1

NCOA1 LGALS12  
AMMECR1L IKBKG  
THRA MEF2A  
UBE2I ZNF646  
UBE2I NUDCD3  
KDM5CRNF2  
EPB41L2 DRD3  
AMBRA1 DDA1  
GNA12 ARHGEF12  
NBN RNF8  
SP100 SAE1  
MITF PAX6  
RGS20 ABL1  
PEBP1 MAP2K1  
SEPT7 SEPT9  
SGK1 RPF1  
TIE1 TEK  
BAG6 ATN1  
ACTN2 SNW1  
BCAR1 SH3KBP1  
YWHAE ATP2B3  
ANKRD28 TBK1  
UBR5 GTF2E2  
LRP2 MAGI1  
UBTF MAD1L1  
PRKCD PDP2  
FANCA SPTAN1  
NCAN L1CAM  
TLX3 ZNF41  
CAT USP53  
EXT2 HYOU1  
MAP3K3 CORO1C  
MAP3K3 ALK  
PDHA1 PDHB  
TP53 KIAA0087  
EWSR1 SMAD4  
SRF NCOA1  
KIT PLCG1  
PTPN1 NTRK2  
CYP2C8 MAST1

STAT3 FHL2  
HSP90AA1 VCP  
CATSPER1 ADAMTSL4  
RASA1 PXN  
E2F1 MCPH1  
EFEMP2 APEX2  
HAX1 MAPK14  
E2F1 NDNL2  
HSPA5 RELB  
SNRNP200 SRRM1  
TARDBP TNFRSF14  
CD4 CD2  
HNF1A RYR3  
SOX30 BAMBI  
FANCA SLC7A9  
DLG1 CACNG2  
NRD1 UIMC1  
GARS IKBKE  
MAP1A UPF2  
ZNF225 RELA  
MED7 ESR1  
UBE2D1 ELF3  
KIT INPP5D  
ABI1 CYFIP2  
FGFR2 STAT5B  
PSME3 RNPS1  
BCR YWHAH  
KATNA1 CD40  
ABCD3 PEX19  
MAP3K3 AKAP8L  
PIAS1 PIAS4  
STK16 SNRK  
LPHN2 SHANK2  
BUB1B CDC20  
TP53 MDC1  
TUBG1 DISC1  
DPM1 ILK  
MED25 TRRAP  
HDAC7 NR2E1  
MEPCE PRPF31

NRG1 ERBB4  
OSTF1 ADI1  
PTP4A3 MCM7  
PIK3CB PRKCD  
TLR3 CSK  
MYB RQCD1  
RPS6KB2 IKBKG  
PARP1 PTK2  
GRB2 SNX12  
SYN1 SYN2  
UBE2E1 RMND5B  
CSNK1D CCNA1  
CDK5 WASF1  
STAT6 RELA  
DLG4 LRP2  
MMP7 SPP1  
CYLD IKBKG  
UNC5A MAGED1  
SBF1 PMS1  
ATM SMC3  
CDC37 MAP3K3  
OPRM1 ARF1P1  
PPP2R5A GNL3  
RGS9 RGS9BP  
SLC2A4FKBP10  
PDGFRB PLCG1  
RPS27A TH1L  
SPTB SPTAN1  
MYC FBXW8  
AXIN1 NIN  
UBE2D1 ZNFX1  
BIN1 DLGAP4  
UBE2H RNF186  
HDAC1 HELLS  
UBA1 USP14  
CTNNA1 PARD3  
XIAP TAB2  
MAPK3 RCAN1  
RAB27A RPH3A  
YWHAB KLC1

ATN1 RAD54L2  
TMED10 FTSJ1  
SKIL FBLN1  
SDCBP IL5RA  
MEPCE YRDC  
SREBF1KLF13  
LRP8 GIPC1  
KIT EPOR  
RBX1 NEDD8  
COMMD1 COMMD3  
FGF18 FGFR4  
PTK2B CD2AP  
CBL UBE2L3  
TERF1 POT1  
MSH3 BRCA1  
GAPDHACTB  
KCNH1 KCNH5  
DAND5 SENP6  
TAF9 TAF8  
CTNNB1 TGFBR1  
HMGA1KAT2B  
H2AFX SSRP1  
CACNB4 TRO  
PSMA3 SNRPF  
ACTN2 CAMK2G  
IFRD1 MEF2C  
EML2 NEK6  
TRAF2 MALT1  
CSNK2A1 PAK1  
TGFB1 ALAS2  
MLL HDAC1  
TSC2 NEK1  
HEXA USP22  
NPAT TRRAP  
PARP1 CENPA  
MAP4K4 RASA1  
WAS RHOJ  
SF3B5 SRRM2  
ACTN2 CAMK2D  
ACTN2 PKD2

UPRT PYROXD1  
CHGB TUBB2A  
UBE4B DNAJC7  
ULK1 MAP1LC3B  
MSTN WFIKKN2  
PCBD1 DIP2C  
STAMBPL1 ECSIT  
SF3A2 HNRNPAB  
ZNF8 SMAD2  
ZNF8 SMAD1  
MYC STAG2  
MAPK1 GAB1  
ELAVL3 CDC37  
CNOT2 NCOR2  
EGFR CTNNB1  
CUL4A CUL4B  
GAS7 CFBF  
SNCA YWHAH  
POLRMT KBTBD7  
USF1 TAF7  
UCHL1 TRAF6  
UCHL1 MCC  
RBBP9 YRDC  
WWP2 DAG1  
MLL SNW1  
EFNA3 EPHA5  
PHLPP1 PPP5C  
E2F2 ARID3A  
OTX2 DMBX1  
TUBG1 RASSF1  
CLIP1 MAPRE2  
SMARCA4 TAF10  
TGFB1I1 NR3C1  
PRNP PSMA3  
GABRR1 MAP1B  
CCDC85B VPS72  
NPY NPFFR2  
UBE2E1 OTUB1  
HDAC1 SPEN  
RPIA NIF3L1

RANBP2 GOLGA2  
HSPA12A MEGF10  
HDAC1 SIN3A  
ACTN4 UBTF  
CBX6 HIST1H3J  
MYL9 MYH9  
YWHAB YAP1  
USP1 PHLPP2  
NECAB2 WDYHV1  
CCDC85B EZH2  
REL EP300  
CCNT1 PML  
WAS WNK1  
HPRT1 HLA-B  
CTNNB1 CDH17  
BCHE COLQ  
LLGL1 KBTBD7  
IKBKE SF3A1  
G3BP1 IKBKE  
CTNNA1 MYO7A  
SP100 ARX  
CBL UBE2D1  
HSPA1B DNAJA3  
GRN HOXA1  
CALM2 MYO10  
UBE2I SIAH1  
AURKABTRC  
STIM1 MAPRE1  
SOD1 BCL2  
GDF11 WFIKKN1  
WBP4 CHTF8  
NEK6 TNPO3  
APPBP2WNT5B  
ATP2A1 PLN  
THRB NCOA1  
ABL1 NOTCH3  
CBL CDKL2  
MAP3K10 KIF17  
CCNE1 HERC5  
COL2A1 PCOLCE



IL6R JAK1  
XIAP TRAF6  
ISG15 ELF3  
HDAC1 UHRF1  
CBL LRIG1  
SEC24DSEC23A  
SEC24DSEC23B  
LDOC1 AEBP2  
SLC25A6 NDRG1  
IKBKE SEC23B  
TACC2 FTSJ1  
MAPK1 SMAD4  
HDAC1 SALL1  
KLHL12 LNX1  
MOBK13 MED31  
AKT1 STAT1  
CSNK2A1 EIF2B5  
KPNB1 RUVBL2  
UBE2L6 RUNX1  
ABL1 TULP4  
HNRNPA1 HNRNPUL2  
PIK3R1 ECT2  
PRPF4BRNPS1  
TLR3 PIK3R1  
PTRF ZNF148  
KBTBD7 MAP1LC3C  
RNF13 UBE2D2  
USP2 RRP15  
SS18L1 CREBBP  
GPR37 DNAJB1  
PIK3R1 PXN  
GRB2 SNX7  
SQSTM1 TRAF6  
ADRBK1 PTCH1  
HAP1 TAF1D  
RAB3A RABAC1  
CUL3 COPS3  
CDC45 MCM3  
SMAD1 MGA  
FGFR1 CTNNB1

ERH BIN3  
SYN3 SYN2  
YWHAG SLC25A3  
RPA2 INSL6  
CCND3 CASP2  
BCAR3 HADHA  
ATXN3 UBQLN1  
STXBP1 TUBA4A  
KAT2B IRF7  
SSB PMVK  
OAZ1 OAZ3  
TGFB1 RAB6B  
ID3 ZNF626  
SVIP GOLGA1  
SCN2A ARHGEF10L  
NOS2 ACTB  
PABPC4 TNFRSF10D  
DAB2 SMAD2  
HLTF RAD18  
E2F1 CWC27  
XRCC6 HTT  
IRF1 HMGA1  
INSL6 HSPBP1  
TCEA2 CAMKV  
DRD2 CAPS  
KPNB1 RUVBL1  
ITGA4 PRKACA  
SNRNP70 SMAD5  
HNRNPA2B1 RBM3  
CD19 MAPK1  
HNRNPH1 NCBP1  
AIRE PLCG1  
TRIM21 USP4  
PDGFB PDAP1  
NBN CCNE1  
CXXC1 SETD1B  
PSMB4 HLA-C  
RFC4 UIMC1  
CORO1A NCF4  
UBL4A FAF2

SART3 USP15  
HSD17B11 BRF2  
ELF3 EP300  
PPARG NCOA3  
CCR5 GNAI1  
GTF2F2 POLR2B  
TXN HLA-B  
GIT1 PCLO  
MYC EPPK1  
ALDH16A1 PAAF1  
DNM1 PIN4  
KPNA4 RECQL  
FGA FGG  
TFAP2A SUMO4  
UCHL1 RPS27A  
SMAD7 HEYL  
GABRB1 AKAP5  
SRSF1 U2AF1  
TNF UBE2N  
PSEN1 EFNB2  
GOLM1 NRSN2  
XRCC6 ATXN3  
IL1B MMP2  
GABARAP HADHA  
FOS PFDN5  
GBAS SQSTM1  
LIFR CTF1  
CNGB1 SRRM1  
SPAG5 EIF4ENIF1  
BHMT BBS2  
ARPC3 LGALS4  
ZWINT DSN1  
HOXC4 XRCC6  
DYNC1H1 SMAD2  
UBE2I HIPK1  
NFYC TAF11  
CCR1 STAT1  
ATN1 RBPMS  
SEC13 WDR44  
ATP5J2 PVRL2

AKR1B1 TRAF6  
SNCG FUBP1  
TRIM24 ESR2  
HSPA4L HLA-B  
SYNCRIP IKBKE  
MYH11 MAPKAPK5  
MED21 PCBD2  
IGF1R GNB2L1  
S100A10 CDK16  
TCERG1 HNRNPM  
NEFL RAN  
SS18L1 TAF9B  
MED14 MED9  
SUMO2 BAZ1B  
TBC1D15 GABARAPL1  
SCG5 UBQLN4  
FEN1 NCAPG  
ACTB SMARCC2  
SRRM1 SNRNP40  
PSMD4 PSMD13  
HSPA2 MAP3K3  
HNRNPA1 DDX5  
SET IKBKG  
PCBD1 MIS18BP1  
SNRPC GIGYF2  
FOXG1 SMAD3  
TTR SETDB1  
GPAA1 PIGK  
RAB3A RPH3AL  
CKLF CREBBP  
GSK3A VTA1  
HAUS6 HAUS8  
RAD1 ATR  
ID2 ELSPBP1  
KIF2A KLC2  
TNF TRAF2  
MPDZ ABCA1  
COIL ATXN1  
TUBB4 INSM1  
GOPC GRID1

C1ORF174 KAT5  
CCDC120 MDFI  
PIAS2 UBE2I  
NCOR1 HIST1H3J  
RAF1 EFEMP1  
TRPC1 TRPC3  
MAP3K7 PEBP1  
S1PR4 GNA13  
TGFB1 SNTG1  
AR PXN  
SLC25A12 PNKP  
ACVR1 NUA2  
MAPK8 CASP8  
NDC80 NUF2  
HAX1 MAP3K3  
COL7A1 SHKBP1  
MPP3 TRIM41  
RARB ZNF423  
POU2F1FDXR  
UBE2D3 DTX3L  
C1ORF94 UBQLN4  
KDM5BDBNL  
XIAP MAP3K2  
RARA HNRNPU  
NRIP1 PPARA  
ACVR1 RAB33B  
MYH10 MAP3K3  
SP100 ARID3A  
MBP STK39  
ETS1 SET  
ATP5F1IKBKE  
RBM14 QKI  
PIGA PIGQ  
MYC HEATR1  
ABL1 APOL5  
KDM1AKIAA0182  
NLRP2 CARD8  
MAP3K3 BAG5  
TK2 COPS6  
GNAI2 C5AR1

BAD EWSR1  
GRB2 CKAP5  
JAK2 SH2B1  
KRT1 FANCC  
TGFBRI CAV1  
BMF MYO5A  
SHBG RMND5B  
CTSB DMWD  
PSMA3 RERE  
UBE3A BAK1  
SPTLC1ORMDL3  
SKIV2L2 DIS3  
MEPCE CAND1  
FAS CASP8  
ILF3 TRIP6  
CREB1 SOX9  
SOCS6 TGFBRI  
CUL2 CAND1  
PTAFR ARRB2  
GATA3 LMO1  
ADCY5 PRKCZ  
YWHAZ PARD6A  
SLC6A9STX1A  
ABL1 SORBS1  
CPE UTP14A  
RBBP5 CHD8  
DAPK1 BECN1  
CCDC85B NIF3L1  
STX4 VAMP8  
MMP1 CCL13  
TAF7 TAF9  
PTK2 GPRIN1  
PRKCA CKLF  
DPH1 RBM8A  
NUDT18 CUTC  
CRK MAP4K1  
EXOC3 MYC  
BCAR3 ACTR2  
H2AFX ATM  
CLIP1 MTOR

ACTN2 PLEKHA5  
AIMP2 STUB1  
GATA4 ZBTB3  
PPP1CAAKAP1  
ELF2 ZBTB32  
RET DOK3  
RPS27A TRIB3  
TRIM15 TAF9B  
GEMIN4 GEMIN5  
RASA1 ARHGAP5  
LMNB1 LBR  
GAK AP1M2  
FYN GRB2  
ABI2 VPS37C  
XIAP UBE2D4  
PPM1E DISC1  
VCAN CCL20  
SHMT2 DDA1  
DLG1 CRIPT  
BCAS2 ESR2  
UBE2D3 BRIX1  
ADAM10 EFNA1  
CHEK2 PPP2R2A  
YWHAZ AKT1S1  
TERF1 SALL1  
STAG2 PDS5B  
SYNCRIP HNRNPD  
SMAD9 HBM  
TBP MKX  
ATF7IP DMTF1  
STAU1 HNRNPU  
PSEN1 DAG1  
GOT2 ATG5  
RNF128 OTUB1  
PSMD4 STUB1  
ARPC2 SNRNP25  
P4HB ELF3  
MARCKS CALM2  
MEF2D MAPK14  
KBTBD10 NRAP

CD3E TRAT1  
FDX1 CYCS  
AURKAIKBKG  
RIPK2 NGFR  
ARR3 RCOR2  
PSEN1 DSG2  
PRKAR2A AKAP6  
SF3A1 SMURF1  
ONECUT2 KDM5B  
BCAP31 CASP8  
TRH ARRB2  
SMNDC1 ASXL2  
PPP2R1A CTNNBIP1  
RGS12 BCR  
GATA3 RPS27A  
CDC25B FHL3  
CNO PLDN  
MLH1 CKAP4  
HIST1H2BB NFKB2  
COPS6 CDH10  
PIK3R2 EGF  
EGFR MOBKL3  
TSPAN4 ITGB1  
SKIL ZMYM5  
KHSRP EXOSC3  
MEN1 TCF4  
ETS1 RUNX1  
CSF3 CSF3R  
TNK2 HSH2D  
SPAG9 EIF4A2  
GTF2E2GTF2A1  
CCND2 CDKN1B  
PARP1 XRCC1  
YWHAZ KCNK9  
CCT2 CTTNBP2  
FBXO11 COPS5  
CD8B ST3GAL4  
FLNA TAB2  
PFDN1 HAP1  
TICAM1 RNF216



FGA FGB  
DAND5 ZNF225  
PTPN1 COLEC11  
PRKD3 RAE1  
USO1 CASP3  
SUMO2 RNF2  
TJP3 GJC1  
CDC34 CUL1  
STAT3 STAT4  
TAF7 TAF12  
EIF3I EXOSC6  
HGS SUN2  
MME EDN2  
FEZ1 CIB1  
XPO1 E2F5  
UBE2K RNF32  
HSPA1B DNAJB1  
FUS LYAR  
KDM5BRCOR1  
EMD GMCL1  
UBC POLQ  
TGFB1 TRAF6  
USP8 OTUB1  
ARIH2 GF11  
SET SETBP1  
USP9Y MAPT  
ZCCHC7 SNIP1  
H2AFX CHD1L  
CDC42 MRPS28  
FAM40A STRN4  
TXNL1 SH3BP4  
MYC METTL13  
CALR B2M  
RPS27A MED15  
CREB1 RFX3  
RAF1 PEX5L  
ZNF24 EEF1A1  
TAF10 MCM6  
RBM25 SF3A2  
GDI2 RAB8A

CEACAM5 PTCHD2  
TP53BP1 RAD18  
FXR2 KCTD4  
RET MAPK8  
MEPCE THOC4  
APP BACE1  
PIN1 RBPMS  
H2AFX XPC  
FANCC FANCD2  
CRK DLX4  
CTNNB1 FOXO1  
PRKCA SDC4  
ASNA1 UBL4A  
GDI2 RAB2A  
H3F3B TLE2  
TRIM39UBE2D4  
AKT2 TRIB3  
IKBKE TOMM34  
FANCA RPA1  
SEMA6A ITSN2  
UNC119 MPHOSPH6  
SETD5 TRAF2  
H2AFX PAPP  
RPS27A WRNIP1  
RNPS1 SF3A2  
HNRNPA2B1 ZMAT3  
PFN2 PTPRS  
MEOX2KDM5B  
CDC7 DBF4  
MED25 MED8  
CDKN1A SLC25A11  
TTI1 HSPA4  
FADD CASP8AP2  
NR4A2 PIAS4  
MEN1 RPA2  
LMNB1 MELK  
STAMPB VPS24  
ATRX KIAA1377  
ARHGDI1 RHOG  
NDUFA10 DEPDC1B

PLCG1 DDIT4  
SART3 LSM4  
APC RP1  
NCK1 SHANK2  
UBE2I SLX4  
PXN CLTC  
FAF2 VCPIP1  
MEN1 ESR1  
POLR2H GTF2B  
ROCK1 TSG101  
SRC CYP4F2  
SCYL2 GTF3A  
AR NCOR2  
LYN GAB2  
MEGF6 GF11B  
U2AF2 BEND7  
BLK CTR9  
TF TUBB4  
DHX9 SSRP1  
S100A8 DMWD  
SF3B1 SF3B3  
STAMPB RNF11  
SRC CNTNAP1  
GNAI1 NUMA1  
CHEK1 CSNK2A1  
BEST1 PPP2CA  
TSC22D3 PLEKHF2  
CHRM3 GPRASP1  
SRC DLG4  
PCMT1 GABARAPL2  
IKBKB STAP2  
HMMR MAPK3  
GNA11 KDR  
CDK2 NEDD8  
GCN1L1 IKBKG  
MAP1LC3B UPF2  
GNAI3 HTR1A  
AKT1 CASP3  
PTBP2 PCBP3  
MEN1 TCF3

TPR HTT  
SRC GTF2I  
RARA SUMO1  
UBE2N IKBKE  
ITGA5 TNC  
TIAM1 MAPK8IP1  
SPTBN1 CDC5L  
SRC RPP38  
HDAC1 KCTD11  
CD2BP2 SNRNP40  
ADD1 ROCK1  
MAP1A MAP1LC3B  
TERT SRC  
DYNC1H1 TSC22D1  
NR2C1 PML  
TUBA3C SIAH1  
VARS IKBKG  
HDAC4 HIST1H4I  
KIF20A AURKB  
CXCR1 CXCL6  
NR4A2 BAZ1B  
PRKACA ITPR1  
ALX1 CREBBP  
SREBF2FHL3  
ECHS1 VHL  
RGL2 KAT5  
ILF2 SREK1  
MAP2K6 PLCB2  
AIRE GEMIN5  
CRADDFAM190B  
TUBB CRIPT  
MAP3K7 BCL10  
A2M CYP2C8  
ERBB4 ANKS1A  
KRT85 TWF2  
UBE2I ZMYM5  
TRPC1 PKD2  
GIGYF2DDX20  
KIAA1279 C21ORF77  
ESR1 NRIP1

MYBPC3 TTN  
MYC SMARCAD1  
MEPCE LUC7L2  
SOS2 SNX18  
AKT1 ARHGAP32  
GRAP2 MAP4K1  
TEK GRB7  
GSN PIK3CA  
TERT XRCC6  
CD2BP2 CMBL  
APC MYO6  
KPNA1 SLX4  
PIK3R1 SUV39H2  
IL6 SH3GL2  
NR4A2 ANP32E  
MYC CDKN1B  
RGS2 ARFGAP1  
PJA2 MAGED1  
PRKACA THOP1  
NCK1 GAB2  
TEK GRB14  
OGT BTRC  
AKT1 EZH2  
ADAM15 SH3RF1  
COIL KLHL8  
MRAS RAF1  
NEB TMOD1  
ITPKA CAMK2B  
GCGR GNAS  
PAX3 DAXX  
ITGB5 GNB2L1  
ATF2 ATF7  
RHOA PKN2  
RHOA PKN1  
GSTM4 UNC119  
PSMB3 FTSJ1  
RPS27AUIMC1  
RARA CNOT1  
CREB3L2 RND1  
MEPCE LSM2

DEDD LTV1  
USP22 CNOT1  
GNB2L1 HABP4  
CSTF2TUBQLN4  
SIKE1 TRAF3IP3  
HDAC1 GCM1  
SNW1 SND1  
STK16 MKKS  
MDM2 RBBP6  
ITGA1 BIN1  
PRKCG PA2G4  
MAX GABBR1  
CLTC TNK2  
EGFR ALCAM  
ZFP64 BEGAIN  
KALRN PAM  
UBE2I CTBP1  
HDAC4 GNB1  
DOCK1 ELMO2  
DNAJA1 TAB1  
CFH ADM  
GABRA3 UBQLN1  
USP8 CHMP6  
ADRB2 KCNJ3  
SOCS1 PDGFRB  
VPS45 SNTG1  
ARHGEF7 CD244  
ADRB2 KCNJ5  
KIF5B KIF5A  
RET IKBKG  
DCAF7 DYRK2  
ITGAM PRTN3  
FXR2 RBBP8  
SLC7A9ZHX1  
PTPN11 GAB1  
FBXW11 USP37  
SNCG HNF4A  
SORBS3 SAFB2  
MAGEA11 BEX2  
MMS19 PHLDA3

SOCS1 CSF1  
PML DAXX  
TTR AGER  
KDM5CUBE2D1  
MCC CLTC  
EGFR PTK6  
UBE2I IKZF3  
AR KLK2  
PHB2 HDAC5  
UBE2E1 CHFR  
CBL LTK  
CDC42EP1 CDC42  
RB1 PABPN1  
SNRPE LSM4  
RALA LRPAP1  
ACP1 SFMBT1  
CREBBP ONECUT1  
HSPA1B PGAM5  
NFYC RPS6KA1  
USP30 QKI  
ARL3 TUBA1A  
SPAG9 MAX  
AGAP2 EPB41L1  
MED21 MED19  
GRIA4 EPB41L1  
EDNRB GNA11  
EXOSC10 FOXRED1  
SFPQ TSC1  
MTA2 DPEP3  
PTPN11 SLAMF1  
ATXN1 CDK6  
ETV3 DDX20  
CASP6 SATB1  
MKI67 CBX1  
NBR1 CIB1  
GDI1 RABAC1  
NR2F1 MAP6  
MYCN MAX  
MTPN TRAF6  
CEP57 UIMC1

EHD2 AP1M2  
EIF3G AIFM1  
HDAC4 HDAC5  
ZNF225 SREBF2  
RPA2 STAT3  
KRT16 TANK  
PYGM TRIM63  
CTNNB1 GLIS2  
IGF1R YWHAZ  
CAPN1 ACTC1  
HCLS1 ACTR2  
MCM6 GINS3  
TNFRSF1B DDOST  
TRIM23 TRIM28  
RUNX2 HDAC6  
SF3A2 DDX42  
SNRPE LSM5  
CREBBP DPEP2  
MED21 MED28  
MED24 SMAD3  
KRT15 RCOR3  
GTF2F2 ZNF638  
CEACAM1 PTPN11  
RHOA DPYSL2  
IPO13 MAGOH  
HCLS1 ACTR3  
PRPF40A ZNF341  
CCL22 CCL19  
TUBB PLK1  
SHC1 GRB2  
FOXRED2 DNAJC10  
NLGN3 NRXN1  
SUMO3 HSF2  
PTK2 ASAP1  
SKP1 FBXL2  
TIMP3 MMP13  
RARB RXRG  
GRIA4 CAMK2A  
GATA3 LMO2  
PDGFRA STAT5B



CALCA ATP2B4  
HSP90AB1 FAM162A  
AVP AVPR1B  
REL TBK1  
LXN CPA3  
GATAD2B FOXP1  
KCNA2 KCNA1  
FGFR3 STAT1  
TUBB4 RELB  
PAFAH1B2 TRAF6  
ARF6 ASAP3  
RGS2 NIPSNAP1  
CENPA DDB1  
FYN HTR6  
SNCA COL25A1  
FYB BCAR1  
CCND3 RBX1  
IRS1 CSNK2B  
XIAP NOD1  
PMPCB PMPCA  
IGF2R PLAUR  
DLG1 MARCH2  
MAP3K7 CCDC88B  
SHBG ACPP  
PAN2 PFDN2  
TSG101 DMAP1  
MAP4K3 SORBS1  
RIPK2 SOD2  
DTNB KIF5B  
XRCC5 TERF2  
DNAJB6 HDAC6  
SUMO2 SMCHD1  
CREBBP NLK  
NLGN2 INADL  
SELE TLN1  
PRNP PLK3  
RING1 UBE2E2  
ZNF823 PAK1  
SGTA EFEMP2  
RBMX SREK1

MLLT3 CBX8  
MLLT6 UBQLN4  
TOX4 CREB1  
VARS TRAF6  
CCT4 RFWD2  
GTF2E2SND1  
MUTEDPLDN  
NFASC NRCAM  
CCDC85B FAM50B  
S100A11 ACTB  
SRRM1 SF3B2  
CEACAM1 CEACAM6  
TNC CNTN1  
CEACAM1 CEACAM21  
ERBB3 CHN2  
LYST CELF4  
NANOS3 MAST1  
SMAD7 ASH1L  
CREBBP PPARGC1A  
UBE2I CASP8AP2  
PLRG1 USP42  
FANCI MAGED1  
IL4R JAK3  
PF4 PROC  
EWSR1 NDRG1  
TNF FBXW11  
VEGFA TNXB  
U2AF2 THAP1  
SNAI1 COPS2  
RNF167 CCDC59  
MEN1 RPRM  
NR4A1 ANKIB1  
HUWE1 RNF11  
HDAC4 ZNF148  
ARF6 IMMT  
SMAD3 RNF111  
KIF1B ARHGAP1  
PAFAH1B1 DISC1  
VIM MAP3K3  
MRAS PLXNB1

BUB3 PARP2  
ERBB3 VAV2  
NR3C1 SUMO4  
NPC1 LRP6  
MAPK10 GTF3C1  
BCL3 RPS27A  
FLII LRRFIP2  
VHL MYCBPAP  
CBL EPHA2  
EIF4E PAK2  
C10ORF12 EHMT2  
MARS HNRNPUL1  
LMNA PCBP1  
E2F1 TOPBP1  
MTMR9EWSR1  
SPDEF AR  
CFH SELL  
RNASEH2A FOSB  
SEC14L3 HLA-C  
NCK1 RIMS1  
MTOR PLD2  
PRKCI IRAK1  
RAF1 RALGDS  
SMARCA5 PRKACA  
TOPBP1 RAD9A  
CD40 RFC5  
RANBP9 MPHOSPH8  
AR LGALS12  
CCND3 EIF3K  
GTF2I TOPORS  
IKBKB MAP3K11  
NOTCH1 GSK3B  
SMARCC2 SMARCD1  
TUBG1 TUBGCP3  
PRKCA THOC5  
INSIG1 FAF2  
VAV1 CRK  
PLG LAMA3  
CFL1 LIMK2  
THRA NCOA6

PDPK1 PTPRB  
CCDC85B AGGF1  
GMNN SMARCA4  
STIP1 USP49  
ATM HUWE1  
CEBPB CREBBP  
NRIP1 CTBP1  
PTBP1 PCBP3  
THRA FUS  
CDC34 ROCK1  
MIF4GD DDX19A  
CALCOCO2 KIAA1267  
TJP1 TRPC4  
SOD2 HSP90B1  
SCNN1A HECW1  
TBL1X CTNNB1  
BCR CFTR  
ACTA1 TNNI3K  
ARPC3 CETP  
PDPK1 PTPRG  
TLE1 ZFP64  
UBE2I DZIP3  
IKBKB TBK1  
CDK4 CDKN1A  
RRM1 ATG5  
ALX4 LEF1  
BRD1 ZNF512B  
GNAO1 CCR5  
CDH1 PVR  
FYN DOK4  
APEH UBA5  
ALOX12B LMNA  
PDPK1 RPS6KB1  
CASP2 CASP8  
UBC RNF11  
RHOA ARHGAP32  
ATOX1 ATP7A  
CAMK2A GIT1  
ODF1 ODF2  
POLD1 GABARAPL2

ITGB5 EPS8  
MTPN FTSJ1  
CBL PTPN6  
CBL SHC1  
COL7A1 ZC3H7A  
AIP ARNT  
NR1D2 RGN  
TOPBP1 ZBTB17  
DNAJC7 DISC1  
RPF1 GRINL1A  
CALR PAK2  
NEFL VIM  
CDK2 CDC25A  
CDK2 CDC25B  
UBC FIS1  
RPS15AIKBKG  
SLC9A3R1 PTEN  
ANXA1 SRC  
KPNA1 PRPF31  
CFL1 LIMK1  
PRICKLE3 SRC  
SVIL NEB  
PRLR VAV2  
CSNK2A1 SPIB  
RBM39 CTNBL1  
RBM10 UBQLN4  
EZR ADRA1B  
IKBKB CDC37  
TRIM21 SKP1  
ZBTB16COQ6  
PSMD7 USP20  
CDK2 WEE1  
STX2 VAMP2  
A2M ECSIT  
UBC MAP3K2  
TGFB1 TSSK4  
ABL1 PRX  
CBLB ASAP1  
TSHR JAK1  
ZBTB16DLST

UBE2N TRIM25  
PAFAH1B2 PRKAB1  
UBE2I GMEB2  
ATP5A1 RELA  
SNAP25CCDC53  
PGR TDG  
AIRE SRSF3  
PGR SNW1  
HNRNPL SRRM2  
INS NOV  
HNRNPU TANK  
PSME3 WDR25  
APOA1 TOMM20  
BMPR1B CDK14  
PHOX2A CREBBP  
MED8 MED31  
ADRB1 DLG4  
KCNA2 CNTNAP2  
CTTN ASAP1  
RRM1 PRKAB1  
GOT2 ARF6  
MYOG CARM1  
UBE2E2 RNF11  
INSIG1 HMGCR  
MAPK9 CREBBP  
ENO1 SUMO4  
GJA5 C20ORF4  
MAX MGA  
THRB NCOA2  
IKBKE TSN  
PMVK MLF2  
PITPNAHSDL1  
NCOA7 MAP1LC3C  
RPAP3 RUVBL2  
FBL TBC1D17  
PRKCI YWHAZ  
YKT6 GOSR1  
GSK3B MAP2K5  
PPP2R1B PARK7  
PMF1 COPS6

MED14 ESR2  
CEP250 PLEKHA5  
PSMD4 UBQLN1  
SHBG EEF1A1  
DNAJA1 TRADD  
RGS6 DMAP1  
TXN GFER  
SKIV2L2 RAPGEF2  
BRCA1 BRAP  
NFATC1 EP300  
ENO2 ST3GAL2  
MAGEB2 RPL22  
HLA-G B2M  
PRPF40A YWHAG  
ARNT AHRR  
HNRNPA2B1 TTF2  
C5ORF22 WBP11  
CAT PEX5  
GIPC1 NUP93  
SYP SIAH1  
NFYC CHD8  
MCM4 HIST1H4I  
WBSCR22 PRKAB1  
MYO9B MOBKL3  
CDK2 TSC22D1  
HSPA5 TMEM132A  
CDC45 ORC6  
SMAD3 FLI1  
MCC VCP  
CCNB1 BRCA1  
IKBKE MAPRE1  
PRPF40A HNRNPK  
SUMO1 STAB2  
POLB NEIL1  
COL1A1 FN1  
SKP1 FBXO5  
SKP1 FBXO4  
SKP1 FBXW2  
SKP1 FBXL3  
GSK3B EIF2B5

TAF1 MSX1  
KRT15 CALCOCO1  
RASD2 SMURF1  
ITGB4 COL17A1  
NCOR1 ESR2  
CD63 PTGFRN  
CELF2 A1CF  
COL2A1 MMP1  
LMAN1 ERP44  
TAF7 CTF1  
CBFA2T3 ZBTB47  
IRF5 TBK1  
HGS IL2RB  
AP2A1 TOE1  
UBR5 TOPBP1  
NR3C1 SMARCD1  
CDK2 IKBKG  
CLPX TSC22D1  
DDX3X TRAF6  
COPS4 MBIP  
CDK2 CCND2  
CBL MST1R  
DDX21 SRRM2  
TPD52L2 WNK1  
CBL YWHAH  
CTTNBP2 CTTNBP2NL  
GPS2 CCDC99  
FOXH1 PIK3R1  
ULK2 SYNGAP1  
PLG MEP1A  
PTMS EP300  
HSPA4 DNMBP  
SUPT3H SAP130  
TSC2 PLK1  
RNPS1 CPSF2  
TSC2 DAPK1  
HSPA1B HSPBP1  
NFKBIA UBE2D3  
CUL1 TBK1  
BMX BTK



EIF4B ALK  
TLR4 EGFR  
NLGN1 NRXN2  
SRC RASA1  
KRT15 ABI3  
IKZF2 IKZF3  
SIAH2 ATN1  
LYN MAPK3  
CALB1 TRPV5  
MEPCE RUVBL2  
PRKACA GMFB  
NCOR1 CREBBP  
LCK FASLG  
PRKAB2 PRKAG1  
XRCC3 RAD51  
ARHGEF15 C11ORF49  
LMO2 SSBP2  
MGRN1 TSG101  
MMP7 TFPI  
AIFM1 HLA-B  
DAZAP2 DAZL  
RIPK1 CASP10  
HSPD1 HNRNPH1  
CTNNB1 SATB1  
SNRPD3 STXBP2  
TRIP10 MCEE  
PLCG1 TUB  
CD3EAP SUPT16H  
ABL1 RASA1  
FXR2 RBBP8  
MYL6 IKBKG  
COL5A1 COL5A3  
UFD1L NPLOC4  
TCERG1 WIPF2  
AR RAD54L2  
EGFR EPS15  
NEDD8 SIRT1  
COPB1 SUN2  
MAP3K8 EEF1A2  
ACTG1 MYO1A

MGRN1 UBE2Q2  
USP12 RAD51AP1  
PRKACA GNMT  
LRPPRC BRE  
BCL2L11 DYNLL1  
AP3D1 VPS41  
PAK2 SH3GL2  
SMARCE1 ITCH  
PSMC4 TRIP6  
MEPCE RUVBL1  
TRIM37 APEX2  
CP PLG  
UBE2N OTUB1  
ENG ACVRL1  
EIF2B3 GOLM1  
GDF9 CRELD1  
FEZ1 BARD1  
LIPH LRP1  
MAP2K2 RASSF8  
ZFPM1 GIPC1  
SUV39H1 BCL11B  
CALM2 PHKG1  
DMD DAG1  
HRG THBS1  
UBE2G2 RNF26  
IKBKB TUBB  
TGFB1 STRAP  
HCFC1 ZBTB17  
ABL1 TSKS  
CREB1 HNF1B  
FYN PXN  
MPG RAD23A  
ABL1 ZDHHC16  
TP53 DAPK1  
RAB27A SYTL5  
SNAI2 HDAC2  
TP53 PLK1  
DAND5 YY1  
VIM TNFRSF1B  
TH1L KIAA1967

SF3B1 SF3B4  
SF3B1 SF3A2  
FASLG MYO15A  
HIST1H3J L3MBTL1  
YTHDC2 USP42  
MBD6 DUSP12  
CD4 CD5  
PRKRA RPL36  
MPG RAD23B  
RAB5A APPL2  
ERBB4 DLG3  
ZBTB17TOPBP1  
CTNNA1 VEZT  
NOP2 MAPK6  
ANAPC1 ANAPC11  
TGFBR1 RNF146  
RNPS1 SF3B3  
MAST2 STK36  
YY1 INO80  
CCNB1 PBK  
PTPRS KAT5  
HIST1H3J LGALS12  
MOBKL3 STRN4  
MAP3K7 MAP4K4  
SAG ADRA1B  
RPL36AL DDX56  
ABL1 DDX41  
DIO2 USP20  
ATXN1 TRAF2  
SOD2 SUMO1  
EGFR CAV1  
ATF2 CEBPB  
CKM RPS27A  
EIF2AK2 DBNL  
MEPCE C14ORF166  
SMAD3 E2F5  
GABARAP ATG16L1  
MED10 MED19  
IL10RB IL22  
FGFR1 FGF5

AMBP CTSB  
ABL1 DKKL1  
LIN7C BAIAP2  
TRIM59ESR2  
KIT GRB2  
FN1 NFYA  
SMCR7 UBQLN1  
ZNF165 KRTAP4-12  
PHLPP2SNX27  
GSK3B HSD17B4  
NCAPG2 PHLDA3  
SMAD9 ASB2  
APC PACSIN2  
KIT RPS27A  
ADAM17 MAD2L1  
RAB5C OSGEP  
DNMT1 PTK2  
CREB1 SUZ12  
EGFR IRS1  
HSPA1B BAG6  
NUP153USP11  
IRS1 RAD51  
EIF3F FBXO32  
CD40 SLC39A7  
RPL37 DDX56  
MEF2C C1QBP  
PIK3R1 RAPGEF1  
UBE2L3 CUL9  
ACTN2 GRIN2B  
ELN LYZ  
GLUL RBBP6  
TRAF5 TNFRSF11A  
RXRA TAF11  
DRD3 EPB41L1  
RNPS1 ARMC8  
SDHB SPNS1  
NUDT18 RWDD1  
GNB4 GNG13  
ITSN1 SNX5  
CYBA RAC1

PRKD3 GSK3A  
CDK2 FEN1  
WNK1 MYO5C  
GRB2 SHANK2  
POP4 BVES  
TP73 SPSB1  
HIST1H3J TAF1B  
WDR5 WDR12  
ARF6 KIAA0368  
EFEMP2 FAM107A  
SRP72 SRP68  
ATF2 HDAC4  
CTTN SHANK2  
UNC119 PHF10  
EP300 MTF1  
PRKCG PARD6B  
KIF5C HES4  
ARAF YWHAG  
MAX MPHOSPH8  
EGFR WAS  
S100A1 S100P  
RAB4A RAB7A  
SMAD2 PAXIP1  
RGL2 KAT5  
ACP5 MAPK9  
MAGEA11 SNX7  
SMAD3 RUNX1  
TOM1L1 COPS7A  
WDR5 WDR61  
COPS6 KCTD3  
STAT5A CRK  
STAT5A CRKL  
NCK1 CBL  
HMGN4EWSR1  
MAPK1 GATA4  
PRKRA COPS6  
MAPK1 NKX2-1  
NFYC RASSF8  
PLG AMOT  
DNNTIP2 ESR2

SRF RARG  
RPL7 PHC2  
HMOX2INSL6  
FH PRKAB1  
SNRPD2 GRB2  
IKBKB EPRS  
EP300 MEF2D  
PPP2CARBL2  
ECD EWSR1  
ZFYVE9 FAM46A  
MIS12 SPC25  
FAM127A ABL1  
SUMO2 RCOR1  
SETDB1 SLC38A3  
PARK7 DAXX  
MTA2 TP53  
FASLG PACSIN3  
CLEC2L EXT2  
VEGFA CSDA  
DNAJB6 KRT18  
KRT5 PKP2  
MSX2 SPEN  
CRK MEPE  
MAP3K8 RIPK1  
KLF9 SIN3A  
PPP1CACDC6  
MDC1 HDAC10  
NCOA1 NCOA3  
TCF3 NEDD9  
CYB561D2 UNC119  
LYN PRKCD  
LMO2 TAL2  
ALB RYR2  
KRT15 EXOC8  
FAS FAIM2  
BCOR CPNE1  
MAX MNT  
EP300 CHD4  
SNX3 SCNN1A  
MEPCE DDX42

APC PROCR  
YWHAZ DISC1  
ERCC5 EWSR1  
USP8 USP22  
NRIP1 TRAF2  
UBE2D2 RNF10  
TRAPPC2 CLIC2  
FANCA LIPG  
ATG5 RCC2  
CDC45 CIAO1  
ABL1 DAND5  
PTN LAMA4  
GRB2 NEU3  
CUL1 FBXW11  
THRA CREBBP  
MBP TRPM7  
ACTA1 CORO2B  
EZR RDX  
NUMB PRKCE  
NOTCH1 PSEN1  
GNAS SMAD2  
TAF6 RELA  
CDK1 POLA1  
LCK DAPP1  
SRRM1 SRPK1  
GCN1L1 WIPI2  
EZR NF2  
HNRNPAB UBE2O  
ZNF205 TRAF2  
GRB2 SRRM2  
ITGB7 GNB2L1  
MATR3 NFKB2  
TACC1 TDRD7  
FN1 CD79A  
SMARCA2 SMARCE1  
PTAFR ARR3  
BMI1 USP7  
PLK1 GORASP1  
NR2F6 ATP5I  
RUNX2 SMURF1

ADSS IKBKE  
GRB2 LIMCH1  
CTTN CTNND2  
CUL4B DDB2  
AR TBP  
PPARGC1B ZBTB9  
GFI1B CENPJ  
POLR2G TAF15  
GSK3B ILK  
RPS27ANEDD4L  
GRB2 RIMS2  
RPS27AUHRF2  
CTSL1 SERPINB13  
FANCI FAN1  
SMAD5 SOX7  
EZR CTNNB1  
TRIP13 MAD2L2  
USP47 BTRC  
CALR PDIA2  
FANCA SNX5  
CUL4B WDR5B  
HSP90AA1 PPID  
GNA12 RASA2  
SUMO4 CCT7  
NBR1 TTN  
TRIM3 UBE2U  
THRA HDAC2  
HLA-B SHMT2  
RPS3 TRADD  
GRB2 DNM3  
PPM1F FEM1A  
TOE1 SH3GL3  
ACTG1 PTPRO  
RPS27AGGA3  
WDR5 CUL4B  
SYT1 STX1A  
RPS27ARFWD2  
H2AFX ATR  
BAIAP2WASF2  
DDX24 MKS1



DUSP1 MAPK10  
COPS6 WIPI2  
DUSP1 MAPK12  
VHL OSR1  
AR HNF4A  
PTPRE KCNB1  
SUMO2 HDAC9  
PRKCA F11R  
KPNA1 CTNBL1  
DLEU1 ARL8B  
BTG2 CNOT1  
SKP1 FBXO2  
EIF4E G3BP1  
OPRM1 DNAJB4  
HNRNPA1 CAPN2  
HR HDAC5  
RBMX SF3A2  
AR PIAS3  
AR IARS  
CASKIN2 PACSIN1  
GTF2I SUZ12  
VIM LMNB1  
HNRNPA1 MAP3K14  
IGF2 IGFBP1  
CDC34 SKP2  
STAT1 DCTN1  
DNM1L VIM  
NOTCH1 NUMB  
ETS1 FAM171A1  
ACTA1 MACF1  
IL4 IL13RA1  
BMPR1B DCAF6  
ACTN4 RIPK3  
FLNC TRIM63  
YWHAG CLTC  
ARL6 BBIP1  
PSMD2 UBA5  
SNX2 MET  
HIST2H2BE PARP10  
HGS TJP2

G6PD SUMO4  
XPO1 NUP62  
WBP4 CHERP  
STAT3 HES1  
TDG DNMT3B  
YWHAZ HDAC5  
ACTN4 NANOS3  
SOD2 SMARCA2  
FANCI GSTK1  
HSPA1B SLC5A1  
PSMC3 ATXN1  
ATN1 JAG2  
SMAD9 SMG1  
EIF3F EIF3J  
EIF3F EIF3G  
CRMP1 HDHD2  
EXTL3 PLEKHA5  
DDX3X RIPK3  
MYL6 RIPK3  
MARCKS TRAF6  
RAC1 ACTA1  
WDR5 CUL4A  
RNF126 TRAF6  
NR3C1 PTMS  
RB1 PPIA  
UBE2K RBCK1  
DCC PTK2B  
PRKCD DNAJC7  
LOR EVPL  
EIF3A IKBKE  
ABL1 CASP9  
HNRNPH3 SRRM2  
LONRF2 OTUD5  
CDC25B YWHAG  
CD9 ADAM2  
RNF19A SNCAIP  
ITGB4 DST  
PSMD3 PSMD6  
CASP7 RNF7  
NAA38 EXOSC10

NIF3L1 RABAC1  
PCBD1 GTF3C3  
API5 ACIN1  
PSMF1 RBFOX1  
VDAC1 DYNLT1  
EGLN2 MOBKL3  
AIRE CHD6  
RPA1 TIPIN  
HSPA9 RIPK1  
GABARAPL2 TBC1D15  
GCG CTSL1  
MDC1 ANAPC5  
PDLIM1 ACTN4  
BCL2L11 GNB2L1  
QDPR GRB2  
TRIM37FAM124B  
MED28 MED13  
ARID1A SMARCE1  
FYN ISG20L2  
SKP1 FBXL7  
MDC1 HDAC8  
GCH1 RAB26  
TAF10 SMARCC1  
MAPK8IP2 LRP8  
BUB1B APC  
ARF6 C6ORF211  
ASAP2 SH3KBP1  
PRKACA MEF2D  
FOS GATA4  
PLK1 DNAJB9  
VAPB USP20  
GSK3A NBR1  
CCDC91 EWSR1  
PARP1 LRIG3  
RIPK2 GAPDH  
SNAPIN HAP1  
TULP2 EWSR1  
MYOCD MAL  
SUMO1 EPAS1  
PRKCE AFAP1

CTLA4 PPP2R5A  
MDM2 PJA1  
TP53 TP53RK  
SETDB1 SMPD3  
UBE2H RNF146  
KCNJ10DLG1  
NFKB1 KIAA1967  
ITGB1 NCKIPSD  
DISC1 RABGAP1  
SART3 LSM2  
DSPP YWHAZ  
KCNJ5 KCNJ3  
PTPN6 PDCD1  
TNFAIP3 KIF11  
FER TMF1  
HDAC4 YWHAH  
ADAMTSL4 SALL2  
KPNB1 TRADD  
CRK SPEN  
PIGR CD79A  
CDC42 MAP3K10  
COL4A5 HABP2  
SLC39A11 C10ORF35  
ZNHIT1 TP53  
KRT18 MCC  
VIM SLC25A6  
GRB2 SH2B3  
CDC5L CDT1  
TIMM50 PHB2  
NDC80 KLHL12  
RHOA ARHGAP1  
SKP1 FBXO9  
STAU1 PABPN1  
SKP1 FBXO3  
USF1 TAF6  
PSMD11 PSMC4  
TK2 PTPRK  
BAG6 UBL7  
GSTM3 ATG5  
CALM2 MYO6

FRS3 PRKCI  
KIAA0556 TBC1D4  
MYOD1CDC34  
IL10RB IL28A  
MYO1F EWSR1  
MMP7 HAPLN1  
NCOR1 CORO2A  
ASGR1 ASGR2  
FN1 SMAD4  
UBE2D2 NEDD8  
YWHAQ MPRIP  
BAK1 SRRM2  
PTGS2 PSMC5  
CXCL2 DPP4  
ZSCAN1 TRIM31  
PEX2 TLE1  
SMAD9 TERF1  
TOP1 PMS1  
KRT37 ELF3  
MNAT1 EEF1A1  
GCN1L1 TRAF6  
HSPA1L TRAF1  
ZNF263 EFEMP2  
YWHAZ BAIAP2  
GRB2 GAB2  
RPF1 SCN5A  
CD59 SLC6A8  
VTI1A VAMP8  
NOP56 MYC  
DAB2 MIB1  
RBM45 USP21  
C8ORF48 MDFI  
VCAN CXCR3  
DLG4 GLS2  
APP HOMER2  
NAE1 UIMC1  
SYNJ2BP ACTB  
VPS36 TSG101  
SKIL CHPF  
CHEK1 XRCC6

STAT1 UBE2F  
CNBP BRIX1  
PSMC3 TXNRD2  
TAF10 ARHGEF2  
CFTR STUB1  
TUBB4 NFKB1  
HLA-G COPB1  
NAA38 DCP1A  
PLCG1 ADNP  
PAEP IGSF21  
APP HOMER3  
NFYC POGZ  
PGR CSNK2A1  
GRM8 GPRASP1  
RB1 SUV420H2  
PGR KLF9  
ITGAL CD82  
ERC1 RAB6B  
SEC61BSEC63  
GNAI3 TSHR  
SRC CD44  
RPA1 ACTB  
RPS6KB1 EIF3B  
RNF43 AKAP8L  
GRB2 CTNND2  
ARHGDIA CDC42  
EZR PIK3R1  
OGT TRAK1  
AP2S1 RAB25  
PPL AKT1  
NCK1 IL3RA  
CUL1 FBXL3  
CUL1 FBXO4  
ZBTB16VTA1  
CUL1 FBXW2  
NFASC TNFR  
PWP1 SMURF1  
ABL1 CAST  
CD4 LCK  
TFB2M PHLDA3

PDIA3 ERO1L  
SRSF2 YTHDC1  
RHOQ DOCK8  
MAP3K3 SSH1  
AIRE SNRPB  
GNAI2 CNR1  
UBE2D3 RLIM  
MSTN TCAP  
GAS7 SF3A1  
THRB NCOA3  
CTNND1 CDH3  
JARID2 EHMT2  
RGS1 GDE1  
RXRA NCOA2  
DISC1 KIF3A  
VCL RAVR1  
HCLS1 LZTR1  
TERF1 RIC8A  
TADA3 ESR1  
KDM4AHIST1H3J  
ARSE TNK2  
ARHGEF7 ARHGEF6  
HIST3H3 ASF1A  
PDGFA HSPG2  
CHRM5 GPRASP1  
TRIM39TRIM17  
CDK1 CDC25C  
DAND5 LMO2  
SKP1 FBXW11  
CDK1 CDC25A  
CDK1 CDC25B  
PRKACA SNAP25  
CD2 PTPRC  
EIF3H EIF4G3  
EGFR ABL2  
PTPN11 GAB2  
MAP3K14 GRWD1  
TRIM32UBE2U  
TGFBR1 XIAP  
FABP4 LIPE

BASP1 RIPK3  
GTF2E1 GTF2F1  
SKP1 FBXL5  
EAPP C20ORF4  
SKP1 FBXL4  
AKT1 ATXN1  
KDM6ANCOA6  
POLR3F BDP1  
CCDC120 CYTH2  
MAGEA11 MED28  
CDKN2B MAGEA11  
DRD4 KLHL12  
CD2 SH3KBP1  
KDM1ARCOR1  
BMP2 CHR1  
RAF1 KSR1  
GHRHRGHRL  
TAL1 SIN3A  
NUDT21 CLP1  
HGS MAP3K10  
GNAO1 ADORA1  
RBBP7 ZFPM2  
FGF12 MAPK8IP2  
SPI1 ETV1  
PARK2 SYN1  
GNAI2 MTNR1B  
PCNA CUL4A  
NCK1 CNTFR  
ATP5J2 CRELD1  
GIGYF2EIF2C2  
RAF1 MAPK8IP3  
SFPQ SIN3A  
THRB NCOR2  
YWHAQ HDAC4  
HIST1H1C NCL  
SYT2 KLHL3  
STAU1 TUBB4  
SPHK1 CTNND2  
TOM1L1 HNRNPH1  
NPPB EWSR1



SMARCE1 SMARCD1  
PRKCA DGKZ  
SF1 RBPMS  
CDH1 EZR  
TGFB1 FANCL  
ADRA1A RGS2  
KAL1 SDC2  
GABRA1 PRKCD  
PPP2R1B MAP3K3  
MYC UNC45A  
IL4R INPP5D  
RAF1 SLC9A1  
CYCS PINX1  
SFPQ HDAC2  
SRF ASCC3  
UBE2E2 RNF114  
PLCG1 TDRD1  
MEF2C TJP1  
SMAD6 PIAS4  
GOT2 MDH2  
CLSTN1 SETDB1  
CD40 NSMAF  
NFKBIE HSPA9  
SHC1 EPS8  
CASP8 PARP2  
GP9 APPBP2  
CHRNA4 CRELD2  
HLA-B HLA-C  
MAFG CREBBP  
BCL2 VDAC1  
TAGLN2 ACTR6  
SNRNP70 HNRNPA2B1  
TNF MMP17  
F2 THBS1  
TP53 CDC42  
ERBB3 IL6ST  
FOXO3 YWHAH  
RPS27A ADRM1  
TNFRSF1B STAT1  
FADD LRRCC1

RAF1 SHOC2  
KHDRBS3 YTHDC1  
IKBKE CISD2  
ACTB SSH3  
ATP6V1E1 GRB2  
DLG4 GRIN2A  
PJA2 UBE2D4  
YWHAB CDKN1B  
SNAI2 HDAC1  
TARS DDA1  
RASD2 SMURF2  
RPA1 HNRNPUL1  
NDC80 CENPH  
RBL1 BEGAIN  
PI3 EVPL  
CDC25C PLK1  
PIK3R1 TGFBR2  
SPI1 GATA2  
CDK1 WEE1  
EGFR HTT  
CLIP4 TRAF6  
EXOSC10 EXOSC8  
DNAJA4 SH3BP4  
KIF5A TRAF3IP1  
NFKBIA COPS2  
TRIM23 TRIM32  
KDM5AEZH2  
SART3 RRP15  
MLXIPL MLX  
KRT6A CCDC53  
FAIM3 ZNHIT3  
GDF9 ACVR2A  
TXNDC9 CHD3  
PSPH TNFRSF14  
KAT5 FAM173A  
PPP2R1A STRN4  
RPL36AL LYAR  
TBCA RXRB  
FOS TSC22D3  
PPARG NCOR2

TGFBR1 AKAP1  
EXOSC10 RPE  
H2AFX RPS27A  
RGS7 PKD1  
SETDB1 BARD1  
COL9A2 C4ORF14  
RBX1 TCEB2  
NCK1 NEK8  
MED14 FYN  
PRMT5 YWHAZ  
IKBKB IKBKAP  
RARA BAG1  
TFDP2 E2F2  
RRAS RASIP1  
HDAC3 RARA  
HDAC3 AR  
STX4 VAMP3  
TUBB PPARG  
POLB APEX1  
CBL SLA2  
DAND5 CRK  
SRRM1 FUBP1  
ZMYND11 PDLIM7  
PIAS1 SMAD1  
KHDRBS1 PACSIN3  
FYN GABBR1  
UBE2K BFAR  
PJA2 UBE2J1  
AXIN1 PPP1CA  
PSMB4 IKBKE  
PPP2R5C PPP2R5A  
MLL NFYC  
MYL6 USP45  
TRIM37RIBC2  
TOB1 RQCD1  
DAND5 RPS27A  
DNMT1 E2F1  
RAF1 VDAC1  
GATAD2A KAT2B  
RIPK2 TUBB4

CCNDBP1 CCND1  
EED AEBP2  
ZNF24 KIAA1377  
RAD51L1 HIST1H4I  
SIVA1 LPAR2  
RAD51L1 HIST1H2BG  
RALA EXOC4  
SRC TUB  
SMARCC2 ITCH  
LDOC1 FAM50B  
PIK3CB TFPC2  
PRKCA TRPC3  
KHDRBS1 ITK  
BUB1B DNMBP  
SRC ANKRD11  
RALYL ZNF408  
PTK2B PDCD6IP  
HK1 SCMH1  
HIST1H1C RBM39  
HIST1H4I HIST1H3J  
TRIM28HDAC10  
TGFB1 ARL8B  
STAT1 PTPN11  
PARP1 MED23  
BCR TSG101  
DRD2 GRIA2  
TP73 HDAC1  
SGK1 LTF  
TOMM40 BAX  
UBC ATXN3  
MAPK8IP3 RAPGEF2  
FASLG PACSIN1  
SRPK2 SRSF3  
AR ETV5  
PRKCI BAD  
PML TOPBP1  
PPAN LYAR  
PIAS1 CEBPE  
TBP SUB1  
KRT20 PLEKHA5

ARSE COQ6  
HNRNPA2B1 SRRM2  
CRYAB EPB41  
MRPL23 C20ORF24  
MAPK9 MAP2K4  
CTNNB1 PTPN11  
HRAS CDC25A  
P4HB FTSJ1  
HRAS CDC25C  
RAF1 CCT3  
HRAS CDC25B  
PRKCG IRS1  
MAPT AKT1  
CASP4 CCDC59  
SMPD1 ASAH1  
CASP4 PTPLAD1  
ARHGDIB RHOH  
VPS16 HOOK1  
DYNLT1 TROAP  
MCM3AP NUDT5  
PRKCA GMFB  
PTK2 ARHGAP26  
CLDN7 TJP1  
RPL31 PRKAB1  
RAF1 PAQR3  
SKIL USP25  
MLH1 ZER1  
ITGA4 PXN  
DCP1A EIF2C2  
SRC YWHAE  
MPP3 KBTBD4  
GIPR RPS27A  
NCK1 RIMS2  
APP CASP4  
PHLDA1 KRTAP4-12  
CACNA1A SYT1  
CD79A SYK  
DISC1 ATF5  
MAP3K3 PFDN2  
DLG1 GNG13

RPS6KA1 SHROOM1  
AR NR2C2  
TRIM63LMCD1  
RGS19 GNAI1  
ABL1 BAZ2A  
SMAD3 ARHGEF6  
NCK1 RAC1  
ENO1 GRB2  
KLF1 SMARCC2  
VIM SH3GL3  
SFPQ FHL2  
RAP1GDS1 CDC42  
LOX DPT  
ATF7IP LUC7L2  
DDX17 LNX1  
PPARG NR2E3  
GABARAPL2 ATG5  
UBE2D3 UBASH3B  
SLC2A4STRN3  
GTF2H1 XPC  
LDLR AP1M2  
MID1 UBE2W  
CASP5 NLRP1  
LMNA PCGF2  
CDKN1B SPDYA  
LMNA CTNNB1  
DAND5 GRB2  
GCN1L1 MAGED1  
TP73 TDG  
MPP5 INADL  
HIST1H3J DNMT3A  
PRKDC HDLBP  
COL4A6 HABP2  
PAK1 ZC3H7A  
ARHGAP5 RND1  
SNAP91NECAP1  
COPB2 COPA  
AR NCOA3  
SRC DNM2  
SOS1 DNAJC14

AURKATACC3  
PLXNB1 PLXNA1  
YWHAB MARK2  
MBP MAG  
JAK2 IL3RA  
RPP40 RPP38  
NUPL2 RAE1  
TNRC6A EIF2C2  
RPP40 RPP30  
C1QB MYOC  
HSP90AA1 PRKCA  
APC COG5  
SGK1 FAM98B  
COPB2 COPB1  
CUL4B CAND1  
RAP1GAP RAP1A  
FBXO5 BTRC  
RPL10 TBPL1  
APC FILIP1L  
MAP3K7 CYLD  
PSMC3 CDKN2A  
FOXH1 TGIF1  
HOXA10 SNAPC1  
PML STAT3  
SAFB2 TOPORS  
TP53 SIN3A  
EIF3F SHBG  
ELK4 MAPK11  
SRSF2 SRSF1  
TJP1 TJP2  
HNF1A EP300  
CTNNB1 FAM123B  
ITSN1 PFDN5  
UBTF SMURF1  
TNFAIP8 MED4  
JUND SMAD3  
SNAI1 ZNF225  
CAPN2 CDK5R1  
IGF1R CAV1  
FLNA CASR

DCP1A EIF2C1  
HDAC3 GATA2  
NTRK1 KIDINS220  
SCEL TXNIP  
TKT GABARAPL2  
SF3B1 RNPS1  
HDAC3 GATA3  
SCT VIPR1  
CBX5 SETDB1  
TLR2 HSP90B1  
USF2 CALML5  
PTP4A3 TMEM41B  
RAB35 PTPRS  
HNRNPL YWHAZ  
PPARG CCDC88A  
TNFRSF1B TUFM  
TP73 TP53BP2  
SKIV2L2 RNPS1  
ELANE CXCL12  
HLA-E KLRD1  
RBM4 LRP2BP  
GSN STK39  
ABL1 GTF2IRD1  
CD3EAP POLR1D  
PML CHD4  
YWHAG EWSR1  
TIMM50 MAP3K3  
BAG6 IER3  
COL2A1 TGFBI  
TRPC1 GRM1  
KPNB1 ELAVL1  
F2 IGFBP5  
CDH1 ANAPC1  
ILF3 KRTAP4-12  
MAF ETS1  
MRPL41 C20ORF24  
ATG2A ATG2B  
HCFC1 PPP1CA  
UBE2K TRIM31  
ABHD16A SAFB



NFYB EP300  
CTNNB1 CDH9  
TGFB1 VEPH1  
RPS9 TSC22D1  
CTNNB1 CDH7  
ATXN7 PICK1  
SF3B1 DDX42  
TULP1 FYN  
NCOR1 SMARCC1  
NANOS3 CAV1  
NTRK1 NTF3  
DDX3X GRB2  
DPYSL3 DPYSL5  
EIF3A EIF4A2  
LPHN1 ROS1  
RANGAP1 UBE2I  
CTNNA1 SPTAN1  
CEBPB SMARCC1  
APBB1 MAP2K4  
CHAT NEDD9  
PTP4A3 MCM3  
TGFB3 CTGF  
SETDB1 PHF10  
MOBK1B STK38L  
ABL1 OGN  
RBBP7 MBD3L1  
RASA1 ERBB3  
JAK3 KHDRBS1  
BCAT1 SMAD5  
RARG SMAD3  
PLCG1 DUSP15  
ABL1 EVL  
CTLA4 CD80  
MPDZ CLDN1  
SF3B1 H3F3B  
TYROBP CLEC5A  
RPS3 NEDD8  
PGLS MDFI  
RAF1 TBXA2R  
CHD4 SIN3A

TAF13 TAF11  
MAP3K12 GOLGA1  
GNAI2 NCF2  
CDK2 PEBP1  
YWHAZ DCP1A  
ITGB4 CLCA1  
PCNT CHD3  
KCNIP1 KCND2  
HNRNPUL2 MEPCE  
OMA1 LRP8  
CSN3 TUBG1  
INSL6 RNF10  
CFLAR CASP3  
CFLAR CASP2  
MAP3K3 LIMA1  
ITPR1 CABP1  
RBL2 E2F5  
CDK2 NPDC1  
DCD INPP5K  
TAF10 ARHGEF1  
SMARCA2 PCBD1  
PTTG1 RAE1  
SNW1 LRP2BP  
SVIL AR  
PPM1D NCL  
UBE2I DACH1  
LAMA5 DAG1  
SYNCRIP PABPC1  
NUP98 RAE1  
F2R GNA13  
DLG4 DLG1  
FEZ1 SMC3  
EBI3 IL27RA  
HLA-B FHL1  
RDBP POLR2C  
COPB2 RGS2  
GNAI2 FPR1  
IKBKB IQGAP1  
SNRPA ATIC  
EIF4A2 SMG1

ARF6 COPS4  
LRCH2 RPAP2  
C1ORF55 MEPCE  
CSN2 NFYC  
AP1M1 AP1M2  
CDK1 PTPN2  
RDX CPNE1  
PFKP DMWD  
HUS1 RPA1  
BLMH MAST1  
PLCG1 GLTSCR1  
FOS TAF1  
RFWD3 UBE2D4  
WBP4 XRCC6  
UBE2I USP25  
DVL2 CTNNB1  
MYSM1TUBB1  
PDIA3 PLOD1  
SREBF2NFYC  
CBFA2T2 MDFI  
ACVR1 RAB17  
TUBB MAP3K10  
TLE1 FOXA2  
CTNNB1 TCF7  
THRA NSD1  
DRG2 RWDD1  
RNF126 UBE2D4  
C21ORF33 FRA10AC1  
EP300 MDC1  
WAS ARHGAP1  
IHH HHIP  
PAK2 SNX33  
KIAA0182 CDC5L  
ZAP70 SHB  
CYP27B1 NRIP1  
GPR143 MLANA  
PRKACA NOLC1  
RHEB ECSIT  
EP300 NCOA6  
CPSF6 ARMC7

GDI1 FTSJ1  
EIF3I SRRM2  
JUND FOSB  
EIF1B MYL6  
MBP SRPK1  
TAF10 KAT2A  
TAF10 KAT2B  
FYN HDAC6  
PLOC2 HNRNPA1  
CD79A HCLS1  
KPNB1 SMAD2  
LRRC47 USP42  
CCNK NECAB2  
CDKN2C INSL6  
GNA14 CHRM2  
EP300 IRF3  
RXRA NR0B2  
STX6 GOPC  
OS9 HIF1A  
BPTF RBBP7  
TRAF2 HIVEP3  
TGFB1 DAB2  
TERF2 DCLRE1B  
PSMB2 POMP  
HADHBGABARAPL2  
GBAS PA2G4  
NBN MCPH1  
RAD51 UIMC1  
JAKMIP1 GABBR1  
CUL1 CDT1  
WAS ITK  
MUM1 ETV7  
YWHAQ ARRB2  
SRF GTF2I  
RXRB DNAJB14  
FAM122B WDR48  
ATG2B WDR45  
GAPDH PCNA  
SF3B1 SMAD5  
NFKBIA MAP3K14

MLH1 FRMD6  
AKR1C3 MAGEA11  
PRKAR2A PDE4A  
SLC2A1UBE2I  
MAGEB2 RPS14  
WASL CDC42  
ACTB CDK5R2  
MED6 MED9  
UBE2E1 ATXN1  
TP53 SMARCB1  
CAPN1 SPTBN1  
COL1A2 MYOC  
UBE2O SAP30L  
TLR4 HMGB1  
IRAK1 SQSTM1  
FANCA NPM1  
MAGEB2 RPS16  
ARNT PTGES3  
PPP2CACCNG2  
ARIH2 DLST  
HNRNPA1 RBMX  
STK38 CTDP1  
NUP93 AHCTF1  
PSMD7 PSMC5  
NRAS RAF1  
TAGLN2 VHL  
MBP TSSK6  
FYN DNASE1L2  
ABL1 MDM2  
ITPR2 BANK1  
PRPF8 SNRNP40  
PRPF40A BAG6  
TCF3 PSMD4  
RPS6KB1 RICTOR  
APP NGFR  
ATN1 KIAA0913  
FANCA ENO1  
PAK1 TRIP6  
IRS4 HSPA4  
MATN1 ITGA1

EIF3B EIF4G1  
P4HB VHL  
YWHAZ PSMD1  
TSG101 VPS37C  
TLX2 IRF9  
CNTFR KRTAP4-12  
NR3C1 LGALS12  
SUMO2 PIAS4  
MAGEB2 RPS11  
SLC2A2PRKACA  
PRKAR2A EZR  
RPS27AAPOBEC3G  
TLR4 MYD88  
UNC119 BRIX1  
MAP3K7 NAIP  
APP COL1A2  
KIRREL NPHS2  
TAF4 DAND5  
DDX5 SF3A2  
KCNJ2 KCNJ11  
ITGB1 ILK  
CAPZB TWF2  
SMAD9 ZEB2  
INSR CRK  
ATXN7 TAF9  
TP53 BMX  
SMAD9 MCM3AP  
PSMA7 RAB7A  
INSR CRKL  
SNRPD3 GEMIN5  
RPL7 MAP3K14  
RAN KPNB1  
STK25 GOLGA2  
SET PRKAB1  
SNAP25SRCIN1  
FYN SF3B4  
SOCS3 IL2RB  
LCT CANX  
MLLT1 AFF4  
YWHAG PHF3

HIF1A HIF1AN  
YAP1 ITCH  
CEBPD SMAD4  
TUBB2A PTPRS  
YWHAG TSC1  
VDAC1 PPIF  
CD3D FYN  
SYK DBNL  
CSK DOK3  
TP53 PRIM1  
IKBKB HSPA5  
MTA2 FKBP3  
SNAP91EPS15  
GRB2 DOK3  
FYN CNN3  
SEPT2 SEPT7  
HNRNPH3 TOB1  
MYOD1SMARCA4  
POLQ REV1  
RARG NCOA3  
TOX4 ATXN1  
APCS LAMA1  
SIAH1 HIF1AN  
CUL2 RNMTL1  
STK25 STRN  
NPM1 SRSF1  
KCNAB1 SLC39A2  
NUP98 NUP88  
YWHAH NCOA2  
MYOD1NR2F2  
MAP2K1 MAPK8IP3  
FSTL3 FN1  
MLF1 GRIK5  
RLF RIT2  
ATF3 DDIT3  
NCK1 KDR  
CPVL CTNNBIP1  
YWHAG NDRG1  
B4GALT3 SURF2  
HMGB1HOXD8

GAK CREBBP  
ARHGDI1 DHX9  
PRTN3 SERPINB13  
RGL2 MYST2  
TRAP1 EXT2  
FGF10 POMC  
MOBK1 ZRANB1  
MAP2K3 TAOK1  
SMAD9 ZNF83  
PDE3A ARFGEF2  
MAPK9 HDAC9  
PDE3A ARFGEF1  
ANKRD55 ZSCAN1  
STX1A RIMS1  
F2RL1 ST14  
LMNA ALOX12  
ACTC1 TNNI3K  
RAB5A RIN3  
PSMD7 TRAF6  
EED DNMT3B  
RPL11 MDM2  
NCK1 MAP4K1  
RXRA BCL3  
SMAD1 SMARCE1  
NAB1 CHD4  
BAAT SLC7A11  
SHBG UBE2O  
RASA1 CSK  
LMO2 KDM5B  
MAPK3 MAPK14  
GH1 SORD  
HAP1 NEUROD1  
DSPP MAP3K8  
CALCOCO2 CCDC33  
NFKB1 C1ORF52  
USP11 USP4  
LDOC1 LNX1  
CALM2 CAMKK2  
PRKCD ADAM9  
EGFR AMH



DEDD USP7  
PRMT5 PAXIP1  
ADRB2 EIF2B1  
BCL2 BAG1  
ANGPT2 ANGPT1  
PPP1CASMARCB1  
RAB4A RAB5A  
BRCA1 MSH2  
PDCD6 CPNE2  
SNCA GRK6  
PCNA OTUB1  
FLNA MYOT  
STAU1 PPP1CA  
RAB5A CHM  
ITSN1 DISC1  
RAN XPO4  
HDAC4 MECOM  
DLST ZHX1  
ZNF367 FZR1  
TNF LTBR  
DSG2 NCSTN  
USP7 DOCK7  
ATRX SUMO2  
MED27 MED9  
HGS KRT18  
SSB LYAR  
PPP2CAPPP2R5E  
MEIS1 HOXB1  
IPO5 TAF1D  
ATG12 HNRNPUL1  
MAPK3 TAL2  
MDM4 BCL2  
CYP27B1 NCOA2  
KIF7 USP22  
SNUPN PAFAH1B2  
MMS19 NCOA3  
DFFB CIDEB  
YWHAG GBF1  
ELANE GZMB  
PDLIM5 TRIM39

RCC1 TRAF6  
DDB1 COPS7B  
HSPA4 BAG1  
H2AFJ XRCC5  
SUMO1 ANKLE1  
EYA4 SIX1  
THRA NCOA3  
DNAJB2 SMAD4  
RPS14 IKBKE  
RAC1 RALBP1  
LAMA5 SOS1  
APBB1 APLP2  
PSMD7 USP15  
IGF1R PTK2  
PSMA7 HIF1A  
VAV1 CBL  
SNAPIN MET  
FES JAK1  
CLASP2 FEZ1  
GSPT1 TNFRSF10D  
PTK6 STAP2  
SRRM1 ACIN1  
POLR3A PKP2  
PACSIN1 WASF2  
ZW10 GSTK1  
S100A8 PRMT1  
MAGEA11 LNX1  
CCDC107 UBQLN4  
CNOT2 CNOT7  
MYH11 GRB2  
CKAP5 PTPRN2  
YWHAZ CDC5L  
ALDOAMYOC  
CYP27B1 TAF11  
CYP27B1 TAF7  
POLR1A SUPT16H  
ACTG1 LGALS13  
FOXO3 USP7  
KDR DNM2  
FLNA MAPK14

TP53 TP53BP1  
ATXN7 ATXN7L3  
TCEA2 MAGED2  
EIF1B EIF3E  
PTPN12 PSTPIP2  
GRAP2 GFAP  
NCK1 DLX4  
AR RANBP9  
ELL EAF2  
LST1 C19ORF29  
TCEAL4 TCEAL2  
SMAD9 RMND5A  
SYT1 SV2C  
CDK1 CIITA  
PPP1CAPP1R3B  
STX7 SNAP29  
HSPB1 TGM1  
DAND5 SMAD4  
TP53 CHD3  
MAST4 SMAD1  
GARS IARS  
UBA5 UFC1  
BIN1 MAP4K3  
BRCA1 RBL2  
MSN PPM1A  
BRAF YWHAH  
CNOT6 CNOT1  
NR3C2 AR  
CCDC85B APEX2  
HOMER1 DNM3  
CRK SRCIN1  
SGTA PTN  
SFPQ RNF43  
NARS ATXN1  
BNIP3L RINT1  
MLH1 DOCK7  
PPARG CHD7  
PSME1 CHD3  
LCK DLG1  
NFKBIA RPL23

STAM2 JAK1  
PRKCB DAB2  
PABPC1 WNK1  
NCKIPSD DMRTB1  
PLOD2 RUVBL2  
NUDT9 GLOD4  
DRAP1 TTF2  
NDC80 USHBP1  
CAV1 SCARB2  
DLGAP1 DLG3  
FAM40B TRAF3IP3  
PRAME UBE2F  
CCDC85B PLEKHF2  
HMGA2RELA  
MYO1DILK  
ZBTB3 GTF2A1L  
BRD4 CLDN1  
FYN CHRNA7  
CAV1 DAG1  
CDC7 CDKN2A  
NFKBIA UBE2D2  
HAUS6 NEDD1  
CANX KSR1  
ITPR2 TRPC4  
STC2 PPP1R8  
UBR5 MAPK3  
SMAD3 SF3A1  
BRCA2 RPS27A  
FGF7 FGFR2  
MED18 MED19  
BRCA2 FANCD2  
NUPL2 APC  
UBE2E1 RNF43  
COPS6 KLHL13  
CNOT6L CNOT2  
CRK GRIP2  
IKBKG KIAA1598  
SMAD3 PIAS3  
CKAP4 ASCC2  
MAGEA1 SH3GLB2

BRCA2 GRB2  
TNS3 DLC1  
TSC2 TSC1  
CASP3 MDM2  
ASB9 HIF1AN  
SH2B2 PDLIM7  
FOS LRRC59  
RAB6A GOLGA2  
LCK PTPRJ  
SMAD9 PPP2R5E  
ACTN1 VCL  
TCERG1 U2AF2  
COPS6 KLHDC5  
HDAC4 CAMK2D  
BSG PPIL2  
BUB3 HDAC1  
ITGAV F2R  
PRKCD PPP2R5C  
CSNK1E RAD54B  
PTP4A3 TTC27  
PDGFRA GRB2  
TP73 ADH5  
SFPQ SMAD5  
BRCA1 NCOA3  
C8B CLU  
CRK ABAT  
TP73 SMAD2  
SHC1 DDR2  
SLBP ERI1  
NACA INSL6  
MED1 MED11  
POLR2I MED19  
KRT7 EIF3A  
NPM1 HAND2  
LASP1 TRIP13  
DAND5 PPIG  
GARS TRAF6  
GRB2 DAG1  
VHL PSMD13  
BCL2 BNIPL

HSP90B1 CSNK2A2  
HTRA2 BIRC2  
BRI3 BACE1  
MED6 MED29  
CCDC85B MOBKL1B  
NCOR1 NR3C1  
COX5B EPB41  
SMNDC1 TRRAP  
FASLG BAIAP2L1  
PTPRC PLK3  
NBR1 VTA1  
PAK2 PACSIN3  
NFYA ZHX2  
HTRA2 BIRC3  
METAP2 RAC1  
GUCY1B3 AGAP1  
RAB15 RPH3A  
PDCD7 HAP1  
VCAM1CCL17  
EIF2AK2 RAC1  
PDE6D RAB8A  
YWHAQ MARK3  
TGFB1 PZP  
EGFR RIN1  
NFKB1 CDK9  
INSR CEACAM1  
HMGB1TBP  
CDC42 ACTR3  
CCT2 ATG16L1  
PLS3 IKBKE  
EMD AKAP8L  
MYBL2 CREBBP  
E2F3 TFE3  
COPS6 KLHL9  
PLCG2 LAT2  
MAGEB2 HNRNPM  
FGFR1 FGF3  
ABCA1 DLG5  
ZBTB5 PHF15  
TBL1X TBL1XR1

YWHAB SPTAN1  
EEF1A1 CRADD  
SMARCC2 ADNP  
FER JAK1  
SKIL ZFP106  
EPHB2 GRB2  
HADHA PIN1  
TNFRSF1B SLC25A11  
MED8 MED19  
CCT7 MED31  
SOCS1 FYN  
RAC1 DOCK2  
FYN MAP4K1  
SMNDC1 SF3B4  
BRI3BP TRAF6  
NAPA BNIP1  
SMNDC1 SF3A2  
BCL2 SF1  
YWHAZ TSC1  
SPTAN1 DDX24  
RHAG ICAM4  
PIP5K1C PIP5KL1  
PSMD3 PSMD10  
CDKN2A FTSJ1  
LYN ITPR1  
GKAP1 UBQLN4  
SMAD3 NCOA3  
RAE1 SMC1A  
EWSR1 E2F8  
COPS6 KLHL8  
YWHAB C1QBP  
CHGB ACACA  
UBXN1 SMURF1  
RB1 TRIP11  
KBTBD7 C14ORF139  
RABAC1 RAB22A  
STAT6 NCOA3  
HTATSF1 WBP4  
SF3A3 FTSJ1  
HADHA SQSTM1

PSMB5 NFKB2  
MAPK11 ESR2  
ARF1P1 PICK1  
TRIM21 NIF3L1  
PRKAR1A HUWE1  
HSP90AB1 MKNK1  
ACTB PLD1  
PIP5K1C HDHD2  
YWHAZ MRPS27  
U2AF2 DPPA2  
CEBPD HDAC1  
AMBP CD79A  
AQP5 MDFI  
MEN1 MYH9  
SIVA1 BCL2  
PIK3CG GABARAPL1  
ANP32A HIST1H4I  
KPNA6 CREBBP  
VTN PVR  
CASP14 USP53  
GTPBP3 FAM60A  
SLC38A1 COPS6  
HAND1 HEY2  
GDI2 TRAF6  
MAPK6 MAPKAPK5  
GHR PTPRJ  
HMGA1 POU3F1  
HSPB1 PSMD6  
RRP1 HIFX  
SKIV2L2 EXOSC4  
MCC RAB1B  
FXD1 YWHAQ  
MAGEA11 CEP76  
GRIN2D PRKCG  
RPA2 UTP14A  
GRB14 MAP3K14  
RPS27A UBQLN4  
STAT3 PRKCD  
GNAQ S1PR3  
PRKACA GSK3B



MAPK13 MBP  
DSC1 PKP2  
PRKACA GSK3A  
TUBG1 PLK1  
DCC PTK2  
MCM2 IKBKE  
RELA UNC5CL  
PRPH2 ROM1  
PARP1 UBC  
UBE2K TRAF7  
CHN1 ACVR1  
ARPC1B WAS  
VIM CASP8  
PLCG1 HNRNPU  
LST1 G2E3  
YWHAZ HSPH1  
NUDT21 IKBKE  
DAP3 TNFRSF25  
RRP1 SLC22A11  
KIAA1967 C20ORF24  
PSPN GFRA4  
CFL1 SSH3  
U2AF2 KIAA0907  
CCNA2 RPA1  
GHR PTPN13  
MYST2 WDR33  
MPP5 CRB3  
CDC20 KRTAP9-3  
MAP3K12 TSC22D1  
FLNB FLNA  
SEC61A1 PRKAB1  
COL5A2 DDR1  
CD3EAP POLR1E  
PTPN11 TREML1  
TPD52L2 TPD52L3  
SOCS1 INSR  
RCC1 PRKAB1  
FOS ZNF133  
UNC119 ANKRD24  
SRSF6 SREK1

RPAP1 SYTL2  
VCL PKD1  
RIPK2 GEMIN4  
OPTN SYNGAP1  
SKIL FZR1  
GNAI3 C5AR1  
RRP1 DDX21  
FOXH1 SMAD4  
GSTP1 MAPK14  
PPP2R3A ATXN7L2  
TP53 TAF10  
NANOS3 NOSIP  
OAT TRAF6  
CACYPB ZRANB1  
FYB EVL  
SAFB SREK1  
ETS1 SP100  
MSX1 MSX2  
SF3B3 SRRM1  
EIF1B SHMT2  
JUND NFE2L1  
FKBP1A GLMN  
PAH QDPR  
PVR PVRL1  
CIAO1 MCM5  
FYN PTPN11  
MARK3 HDAC4  
FYN DLX4  
H2AFX PRKDC  
TP53 MNAT1  
MMP2 MMP14  
TP53 CCNH  
CDC42 PARD6A  
CD99 UBQLN4  
WDR5 DTL  
HNF4A MAPK14  
CDK8 MED10  
CELSR3 SWAP70  
HSPA4 CTNBL1  
PRKCA NRG1

TXNDC9 KIAA1377  
HDAC1 RUNX2  
CTSB BAG6  
BIN1 GRB2  
CTNND1 CDH1  
TLR4 ECSIT  
TADA3 MYC  
FN1 FBLN1  
HDAC1 NFYC  
SMAD9 FLI1  
TP53 CCNG1  
FHL3 FHL5  
PSME3 NCOA3  
HIST1H1A TLK1  
DOCK10 C1ORF190  
GLMN NSFL1C  
FOXP4 FOXP1  
SAP18 ATP5L  
RIPK2 NFATC2  
GNG7 GNB1  
FYN BTK  
ATF3 INSL6  
MYC PRPF8  
NCOA6 RBM14  
ACTN2 COIL  
AP1M1 EHD2  
CDKN1B COPS5  
NR3C1 NCOA1  
MCM3 PAK2  
CREG1 CAPN1  
CBFA2T2 NCOR1  
HNRNPD PCSK7  
ATG16L1 MAP1LC3C  
SNW1 ASCC2  
CXCR2 GRIA1  
PRKRA IGF2BP1  
HSPA5 HFE  
PRKCE RASGRP3  
MPDZ CAMK2A  
MED27 MED29

PTEN MVP  
SET MLL  
SOCS2 TCEB1  
ACTC1 TWF1  
ZBTB9 ZNF408  
PIM1 CBX1  
SRRM1 ISY1  
MLNR GHRL  
PSMC5 NFKB2  
GNG7 GNB2  
CENPA CENPT  
HNRNPK SORBS3  
N4BP3 YWHAG  
VAMP4 VTI1B  
E2F1 SP3  
H2AFX KAT5  
E2F1 SP4  
PAFAH1B3 C14ORF1  
RB1 CYP27B1  
NFKBIA COPS8  
PPP1CAPP1R8  
SOX10 HHEX  
APOH RBBP6  
SSFA2 YWHAZ  
NFKBIE BAG2  
HNF4A UBE2I  
CD19 VAV1  
GRIN2D HNRNPU  
PRNP PTRH1  
PLSCR1KRTAP4-12  
NEK2 CLEC4C  
SHC2 NTRK3  
RXRG JUB  
YWHAB GBF1  
HRSP12TRIB3  
SHISA5 COPS5  
NXPH3 SRC  
UBR5 PAIP2  
RNF123 UBE2W  
GNA11 ADRA1B

PSG4 PTPN12  
EWSR1 HERPUD1  
SYNJ2 ABL1  
KRT15 TUBGCP4  
CDK2 SORT1  
PAM TSC1  
UMPS NANOS3  
GLO1 IKBKE  
SPRY2 PPP2CA  
EIF4A2 RPAP2  
CREB1 RNF4  
COL1A1 ITGB1  
CDK9 ILF2  
CTNNB1 CTNNA3  
LSM11 WDR77  
GRB2 IKBKE  
ERG LMO2  
EWSR1 SUZ12  
PAFAH1B3 ZHX1  
MAP2K1 VPS36  
PLK1 USP20  
PRPF40A U2AF2  
RHOD PLXNA1  
CCT7 PPP2R2C  
BTBD9 USP25  
CADPS2 UBE2D4  
COLEC11 GOLM1  
MYC USP9X  
NANS TNIK  
SMAD4 SNW1  
CHAF1A CNOT6L  
IPO8 GTF2F2  
TGIF1 MED31  
HLA-B NAP1L1  
PKLR PXN  
MASP2 SERPING1  
LCP2 PAG1  
SYCP3 SMC3  
C1QB PTX3  
SMAD4 TDG

THAP4 MOBKL3  
FZD7 WNT3  
PSMD7 UCHL5  
GRB2 TRIM14  
RXRA DNTTIP2  
FA2H UBQLN4  
FOXO4 SMAD4  
PCBD1 RBL2  
STAMPB EPS15  
NR3C2 PTGES3  
YWHAB TSC1  
POLD2 POLD3  
CHD3 FUBP1  
CDC42 SETX  
PLK1 NINL  
ANAPC7 CREBBP  
PAK2 CPSF6  
MED14 PPARGC1A  
NUFIP2 G3BP2  
MAGEA11 TRMU  
SPI1 SPIB  
RPAP2 HELLS  
CDK9 TRAF2  
CYP27B1 NR0B2  
ILK ACP6  
SMAD4 CAMK2G  
CDK2 REL  
RTN3 FAM160A2  
PRPF4 LSM6  
POLR3D POLR3C  
PDK4 TRIM63  
HIST1H4I PRMT1  
DYNLL1 DYNLL2  
FLNA MAPK6  
PPA1 SUMO4  
MAGEA1 SMCR7L  
YWHAG ANKS1A  
MBP TLK1  
PRKAB2 MAP3K6  
PPARA NRBF2

GTF2I MKNK1  
SMAD4 HDAC1  
RPS27A SMURF1  
MYC MED12  
STK3 MAP1LC3C  
UNC119 GIPC2  
SNAP25 TRIM9  
SKIL HIPK3  
CDKN2D CDK4  
EIF3J TPD52L1  
CLN3 HSD17B12  
RAF1 BAD  
PTP4A3 TOMM22  
MYO1C EIF4A2  
CHAF1B CNOT6L  
TRIM27 UBE2I  
NFKB2 RPL18  
NUDT21 PSMF1  
ATXN1 ARHGAP32  
MED1 TGS1  
YWHAZ MPHOSPH9  
PPP1CAAKAP11  
PRKCZ NFATC2  
GTF2F1 CTDSP1  
PRPF4BRRP1  
HNRNPA1 GTF2A1  
TP53 NPRL3  
ALOX12 KAT5  
TOM1L1 CELF1  
ATAT1 EP300  
NSMAF KBTBD7  
CEBPB PTGES2  
EFEMP2 HOXA1  
CALCOCO2 C1ORF65  
NR3C1 THRAP3  
TSEN54 TSEN2  
CHMP4B CHMP5  
GTF2H1 ERCC4  
RBM25 RNPS1  
RAF1 SPRY4

VPS35 VPS29  
COIL CSNK2B  
DNER NCSTN  
GRB2 DOCK1  
HIST1H1C RELA  
EED DDB1  
CCND3 DTNBP1  
LYN INPP5D  
ASAP1 SNX9  
KIAA1045 HDAC4  
S100A8 MAP3K3  
PLCG1 DNMI  
STAU1 DHX9  
GRB2 DCTN1  
YKT6 HNRNPH1  
EXOSC10 USP16  
MED1 MED15  
HNRNPM RBM4B  
PLXNB2 SEMA4A  
SKIV2L2 EXOSC5  
MSN TRAF6  
STAT1 PLEC  
TRIM27UBE2D1  
ERBB3 PTK2  
ABHD16A PILRB  
SART3 SRBD1  
HAT1 UBE2A  
RBPMS HEYL  
TAF15 PRMT1  
HNRNPD GPN1  
GLRX3 ZNF512B  
GRB2 LY6D  
CBR1 GABARAPL2  
OTUD4 ILK  
DRD2 KCNJ6  
C1QBP RIPK3  
NFKBIA RPS27A  
RARB PRKD2  
BEND7 SDCBP2  
GTF2B FOXF2



SLC9A1MAPK10  
LYN RPL10  
RPS27ARBL2  
PRKACA CCDC88A  
EFEMP2 ZNF426  
KIAA0174 ATXN1  
CDK2 CDC5L  
NCL NFKB2  
LYN MAP4K1  
PPP1CACUEDC2  
ACOT7 ATXN1  
NFKB1 COMMD1  
PIK3CDPIK3R1  
PSMD11 SMAD3  
FARP2 YWHAG  
PDLIM1 PGS1  
COQ9 ACTL6B  
AR PAK6  
RB1 GATA1  
SMAD4 SQSTM1  
FOXO4 PIN1  
HGS TADA2A  
OAT PRKAB1  
MAD2L1BP TRIP13  
CASP9 CARD8  
TFAM TFB1M  
FGR WAS  
HERPUD1 UBXN6  
NANOS3 FIS1  
SYNCRIP PLCG1  
FAS FASLG  
EGFR RIPK1  
RAC1 WASF1  
USP48 RAPGEF2  
PTP4A3 TUBG2  
PRKACA PSEN1  
ID1 ELSPBP1  
GRB2 CTTN  
DARS TNFRSF10D  
NOVA1 PCBP1

HMMR TPX2  
KDM6ATLE1  
IKBKB EIF2AK2  
EGFR CAMK2G  
RPS11 LYAR  
ESR1 TUBB  
EMD COPS6  
LATS1 MOBKL1A  
MED6 ESR2  
TBP TAF12  
GRIN2B LIN7B  
HSPB1 PPA1  
WDR33 WWOX  
RB1 CUX1  
LYN CSK  
PKN1 ARHGAP10  
STX4 DLG1  
SMAD2 HUWE1  
EGFR DCTN2  
RHOC CNKSR1  
VPS33B VIPAR  
MARS TNFRSF10D  
CAV1 FLOT2  
HMGB1 UNC119  
GRM5 CALM2  
PLA2G4A MAPKAPK5  
TCF3 HAND2  
RXRG PPARA  
APC CTBP1  
GAS7 CYFIP1  
CASP4 NOD1  
ZNHIT1 CSNK2B  
MLH1 PTGDS  
SMAD4 RHOJ  
TERT PML  
CASP4 HIGD1A  
AGR2 UBQLN4  
NFKBIA RPS27A  
TBP SNAPC1  
RHOXF1 NPAS2

HTATSF1 FEZ1  
FBLN1 ATN1  
XRN1 EXOSC1  
MAP3K10 RANBP9  
C3 C5  
DAND5 HDAC1  
DYNLL1 CLIP2  
PCM1 HAP1  
RANBP1 TNFRSF10D  
YWHAG FRY  
NCK1 HOXC8  
UBE2G2 UBE3A  
CCDC85B SETD5  
CRK PXN  
UBE2A UBR3  
RIPK2 BIRC2  
STX12 HOMER1  
ACTC1 BRP44L  
PFDN2 PRKAB1  
FANCA ATP5B  
EGFR SNX1  
NPEPPSPRKAB1  
KRT10 MDM2  
GH1 NPM1  
KIAA1377 EPN1  
SCNN1A TSG101  
GSN CASP4  
CD3EAP NFKBIB  
PTPN1 IRS1  
UPF1 TRMT112  
HSPB1 PRKD1  
CASP4 VDAC3  
ARF6 SF3A1  
NCOA2 SMARCE1  
DOK2 ASF1B  
ID3 GTF2A1L  
LGALS1 SUSD2  
DERL2 SEL1L  
CALCA ATP2B2  
TCN2 PAXIP1

PTGES3COPG2  
RAB5A INPP5F  
IL3RA CSF2RB  
IGF2 NOV  
MMP2 TIMP2  
DDX24 GIT1  
FHL3 LASP1  
YWHAG SYNPO2  
RAN TNPO1  
YWHAG PRPF19  
TRIM3 MYO5A  
TSC22D1 MTR  
EIF2C1 EIF2C2  
PBX2 BAIAP2  
AURKAPPP1CC  
TK2 GAPDH  
TRIM11MED15  
MYST2 TP53  
MAP3K3 TMOD3  
TP53 MAPKAPK5  
CCT5 IKBKE  
DOM3ZXRN2  
DYNLL1 NTRK3  
EMD RCOR1  
NF2 MED28  
SET TRAF6  
TADA1 USP22  
NR3C1 EPB41L3  
DLK2 ADAMTSL4  
RIPK2 BIRC3  
BCL6B SIN3A  
MMP13 ADAMTS5  
ABCA1 RAPGEF6  
PPP2R1A IKBKE  
TRAF2 TRPT1  
FCHSD2 HSPA5  
RIPK2 SMAD4  
RPAP1 GPN1  
TUBB2A HDAC6  
CASP1 CASP4

VPS26ASMYD2  
GPRASP2 BARD1  
PKD1 ATF7IP  
CPSF6 WWP1  
BRAF SFN  
BRAF YWHAB  
PLIN1 ABHD5  
UBE2E1 UFM1  
PSPH PRPSAP1  
CYR61 ITGB5  
RPS16 IKBKG  
CDH1 KIFC3  
DCP2 DCP1B  
STRN4 CTTNBP2NL  
RB1 CEBPE  
EPOR GNAI1  
ATG12 LMNB1  
AES HNRNPAB  
IKBKB CNTN2  
S100A9 ARRB2  
TRAF1 RCN2  
GNB2L1 AGTRAP  
RANBP9 DISC1  
SPTBN1 PLCB1  
MC5R ASIP  
LAMP1 AP2M1  
DVL2 ZNF263  
YWHAB RASGRF1  
YWHAZ DDX1  
PFN2 IVNS1ABP  
APBB1 HNRNPH1  
NCOR1 UBE2I  
WBP4 SF1  
LYST VTA1  
APEX1 CSNK2A1  
PTK2 CSPG4  
ARPC3 ARAP1  
ACTN1 ATXN2  
OLFM2 RPS6  
USP7 EWSR1

SORBS3 DMRTB1  
SETDB1 CDK4  
PCNA DDX11  
IRF3 PPIP5K1  
ORC3 USP19  
ID1 RUNX1T1  
UBE2F WDR77  
EDF1 NR1H3  
SMAD3 UCHL5  
FHL3 RBM42  
MYBL2 ZNF622  
PLOD1 MAP3K3  
PDHB TRIM63  
RAB3B RPH3A  
ARVCF CDH15  
RB1 AP1AR  
TFG VOPP1  
YAP1 WBP2  
SRRM1 PRPF19  
BECN1 KIAA0226  
RPL27A  
HAP1 MPP3  
SMAD3 HEY1  
PRIM1 RAE1  
PHC2 SFMBT1  
FANCA NUB1  
YEATS4 NUMA1  
HDAC3 SRF  
CTSG VCAM1  
MCM3AP SMAD3  
TP53 SULT1E1  
CPSF6 EWSR1  
SLC9A3R1 PHLPP2  
ABL1 CDK1  
SMARCA4 NFKB2  
MAP3K1 CDC37  
PPP3CBMYOZ2  
DLG2 FZD4  
AMBP GRB2  
BCOR HDAC5

ERBB2 OSMR  
LTF CALM2  
SNAPIN SHBG  
STX1A VAMP8  
ADAM17 SH3D19  
TLK2 ASF1A  
PI4KA STRN4  
CASP4 HEATR2  
BCL2 CYCS  
MLL2 ESR1  
MAP3K1 DDB1  
RBM25 CDC42  
TRAF1 HIVEP3  
CFL1 ACTA1  
INPPL1 FCGR2B  
ESR1 CCND1  
RTN3 RAB33A  
ATXN1 AHDC1  
PSMA3 PSMD13  
IGF1R MDM2  
PPP2R1B USP53  
ITGA2 HSPG2  
HNRNPK WWOX  
CLTC NFKB2  
PPP2CACDK6  
GADD45G LUC7L  
POLA2 EZH2  
RAB3GAP1 RPH3AL  
EPRS EEF1D  
PRPF4 PRPF31  
RPS5 NFKB2  
ITGB2 NUMB  
SUV39H1 HIST3H3  
HDAC3 CTBP1  
VAC14 EIF4A2  
HOXC8 DLX5  
NR3C1 NR2E3  
EHD4 GSTK1  
BRAF YWHAZ  
NPY NPY2R

CSTF2 CSTF3  
NCK1 SOS1  
UBE2E1 RNF11  
DUSP1 MAPK14  
YWHAQ YWHAG  
CDK1 FEN1  
PRKCB GCNT1  
NCL HIST2H2BE  
RNF19B UCKL1  
AVP TXNDC17  
PSMA7 GABARAPL2  
GDF9 MOBKL3  
NCK1 SOS2  
SKIL WWP1  
PTPRA UVRAG  
TCF4 EP300  
STX11 C19ORF50  
HNRNPA0 MEPCE  
PSMD1 TRAF6  
RELA SIRT5  
TP53 TAF6  
YWHAG BAIAP2  
MYCN NMI  
EEF1D CCT7  
KRT1 LOR  
TP53 GSK3B  
SKIV2L2 EXOSC7  
DLG5 BTBD10  
PRKCA JAK1  
CYP27B1 NR1H2  
GLUL HIPK3  
FRMD8 IKBKG  
CDKN2A CDC6  
SMARCA2 KHDRBS1  
FRK ABI1  
AP2A1 DPYSL2  
PSMD6 PRKAB1  
TAF1 ASF1B  
ATP1A1 EZH2  
GRAP2 GAB2



STAT3 CDK9  
CACYPB CNOT8  
ZNF646 MDFI  
BCL2 PPP3CA  
CAD RPF1  
SERPINE2 COL4A2  
CCNE2 CDKN1A  
ARID4A INGX  
SHC1 SHCBP1  
PCMT1 CREBBP  
TPT1 EEF1D  
CDKN1A SET  
EFNA1 EPHA1  
MED25 MED18  
PCNA MCL1  
POLR2C GTF2B  
KBTBD7 MRPL45  
TTR PIK3R5  
TAF13 TAF7L  
FLNC WNK1  
TAF1 CCND1  
CDC45 CDKN2A  
XRN1 CENPBD1  
SFPQ MAP3K14  
CTNNA1 LIMA1  
YWHAZ MAP3K5  
PDS5A SMC3  
TCERG1 WAS  
MAP2K5 CCDC40  
STX11 CCNK  
GTF2E1 GTF2H1  
HIST2H2BE DZIP3  
UNC13B STX1B  
PAX3 SOX10  
PDHA1 DGKE  
E2F5 CREBBP  
YWHAZ LYST  
SMARCA4 NONO  
DMD UTRN  
CYP27B1 NCOA1

MRE11A FANCD2  
RPS6KA5 EP300  
DYNLL1 NRF1  
SORBS2 AKT1  
NFKBIA UBE2D1  
MAPK12 INADL  
BIRC2 FBXO7  
SMAD3 SMAD1  
SMAD3 SMAD2  
SQLE RAPGEF2  
NPM1 USF2  
IGF1 IGFBP3  
HOXD4 TIGD4  
RAE1 TJP1  
PSMC4 PSMD4  
PRNP CAV1  
USP12 WDR20  
CCNT1 MYC  
PSMB1 PSMD4  
RPF1 PMEPA1  
GABRR1 P2RX2  
UBE2B UBR3  
UBA3 UBE2F  
SGK1 SF3B2  
PPP1R12A ILK  
DYNLL1 NTRK2  
PIAS2 SNIP1  
AKT1 HTT  
TOP2A MAPK1  
BECN1 SMC3  
TLE1 RERE  
HSPA5 TBK1  
CCDC85B IKZF5  
CRK REPS1  
SNAI1 CTDSP1  
SCGB1A1 LMBR1L  
PCNA POLE  
BEGAIN C16ORF48  
XRCC6 MSX2  
RBMX USP45

COPS5 PLAC8  
HSP90AA1 SMYD3  
GTF2F2 GTF2F1  
POLR2E PML  
CLDN3 GRB2  
RPAP2 MED17  
GTF2H1 TXNRD2  
POLR3F C14ORF1  
KHDRBS3 ZNF408  
PLG SPARC  
ZFYVE9 CHD6  
ORC2 TERF2IP  
DVL2 CSNK1E  
PRKCZ FADD  
DLG2 GRID1  
NR3C1 MED1  
MYH9 GPRIN1  
IAPP PCSK2  
RNASEH2A NINL  
TECPR1 ATG3  
IL1R1 IL1RN  
RPS11 RELB  
ADCY6 CHRNA7  
EED PPP1CA  
DEDD KHK  
CD63 HLA-DMB  
SRSF4 PPARGC1A  
HSP90AB1 GTF2E2  
HAP1 PABPC4  
PRKCZ MAP2K5  
LONP1 DAXX  
TUBA4A TBCE  
VPS41 MON1B  
CDH1 ANAPC7  
PAICS MCC  
RPL31 GRB2  
PPP1CAPP1R9A  
CCNE1 FBXW7  
DRP2 DTNA  
PCNA DSCC1

HIF1A SAT2  
SREBF2ZYX  
CTSL1 CTSC  
XRN1 LSM4  
UPP2 VIM  
HK2 ZBTB17  
PAK1 DYRK1B  
MEIS1 HOXD13  
AP1G1 ZNF512B  
GOLGA2 TUBGCP4  
CASP4 SRPRB  
NR2C2 NR2C2AP  
MEIS1 HOXD12  
ABL1 RB1  
SREBF2RAB11B  
RIPK1 TAB2  
KCNH4 MAPK8  
IQGAP1RIPK3  
KCNH4 MAPK9  
SNRNP70 SMURF2  
STAM2 STAMBP  
YWHAZ PRKCD  
NF2 PAK1  
HIST1H4I HDAC9  
KRT10 GLE1  
HSP90B1 UBA5  
PAK2 PSMD13  
FYN TYRO3  
CASP9 GMEB1  
ATP2A2 TNFRSF1B  
SFPQ RAPGEF2  
HSPA5 MAP3K3  
MYOD1ASCL3  
HIBADH HOMER3  
GRB2 PTK2B  
COL4A3 KLK6  
CCDC85B FAM124B  
PSMD2 UCHL5  
DYNLL1 DNAJB9  
SFTPD MFAP4

IFNAR1 RPS27A  
YWHAG HDAC5  
TNFRSF10B FAS  
APOB CANX  
NSF NEK6  
LNX1 C19ORF50  
DAND5 NR5A1  
ARR3 RNASE6  
MAP4 RXRB  
MAP3K11 KIF3A  
DYNC1H1 NDEL1  
XPO6 BRF2  
BCAR3 RUVBL1  
CFLAR DEDD  
PDE6D RAP2B  
CDK4 PPP1CA  
PLG HMGB1  
SEC23BFYCO1  
MCM4 SSRP1  
IL7R PTK2B  
SNCA KIAA1191  
GATA1 TRIM29  
BCL2L1BECN1  
TUBGCP3 TUBG2  
APLP1 APLP2  
EED YY1  
ENG ACVR1  
TNNT1 TNNT3  
LONRF3 SMURF1  
LRPAP1 POLA2  
NFKB1 ELF1  
TANC1 SHANK1  
UBE2B HLTf  
CCT4 STK24  
HNF4A NR2C2  
HIST1H3J EP300  
KRT10 NFKB2  
IL20 IL20RA  
KPNA1 RELB  
TRIM27UBE2Z

ERCC8 COPS5  
HGS STXBP1  
CCT3 NFKB2  
MAP1LC3C ATG5  
RAD23B EEF1A1  
CDK8 MED1  
ZFAND5 TRAF6  
BMI1 KIAA1377  
DNAJA1 TNFRSF14  
NPEPPSTRAF6  
FANCA CDK1  
BCL2 RAD9A  
TRDMT1 EEF1A1  
HIST1H4I DNMT3L  
PFN1 CMA1  
CD63 SRF  
LDLR LDLRAP1  
PTPN11 LAIR1  
STMN4 TRPC5  
NRXN3 NLGN3  
BCL2 PKMYT1  
YWHAG MACF1  
SYNM DTNA  
MAP3K10 HIPK3  
ARRB2 RPS27A  
SNCA MEF2D  
DLG3 DLGAP4  
ESD TRAF6  
RRM1 HLA-B  
MCM3AP CDC42  
TRAF3 TRADD  
CDKN1A E2F1  
AKAP17A SRSF1  
HDAC3 MEF2D  
PRKAR2A MYCBPAP  
ATXN7 RAD23A  
CCS YWHAG  
PRNP STIP1  
KIAA0182 RBPMS  
HLA-B CDKN2A

HCK BTK  
SP100 TRIM29  
LMNB1 PRKCD  
UPF1 INTS6  
ATG12 SERBP1  
IPO5 WNK1  
TAL1 RUNX1  
NASP LUC7L2  
PTK2B ARHGAP21  
DDOST CLN3  
ACTR1B DCTN1  
ITGA2 PDIA3  
PRKCH GOLGA4  
HDAC4 RUNX3  
GFI1B MON1A  
BMPR1B LZTR1  
APOB CALR  
DLGAP3 PTK2B  
RPAP2 INTS7  
RPF1 WBP2  
HNRNPH3 RPS4X  
SAP18 DES  
GCLM TNFRSF14  
RYR1 PRKG1  
PML SATB1  
NPM1 CDKN2A  
MARK2MARK4  
POLR2C TH1L  
EIF1B PSMB7  
CAMK1HDAC5  
BUB1B CDC27  
NSMAF XIRP2  
GRB2 FLNC  
RRM1 IKBKE  
POLR2H POLR2G  
KAT2B HIPK2  
NOTCH1 CDC42  
CACYPB FTSJ1  
HNRNPA1 ROCK1  
VDAC1 PRKCE

SLC16A1 SERINC3  
CBFA2T3 HDAC6  
GDNF GFRA1  
CRADDLRDD  
CDK5RAP3 DMBT1  
POLR3F GTF3C4  
SRP14 IKBKE  
GRB2 MYBPC2  
RHOA DEF6  
PTGS2 COPS3  
PPP1R12A ROCK1  
IGF1R CRK  
YWHAG MYH9  
IGF1R CRKL  
RB1 CDK4  
YWHAG SRRM2  
NCK1 ASB16  
CHGB CCDC92  
ACTN1 PTPN1  
MED25 MED10  
COL1A1 IGFBP3  
EIF2S2 TLE1  
CASP3 RPF1  
RXRB NR2C2  
CLSTN1 SLK  
ICAM2 EZR  
CRHR1 GNAS  
GSN FHIT  
RPL31 IKBKE  
NFKB1 IKBKG  
SNX1 ACVR2B  
MKNK1MYO6  
CLTC EHD1  
CD247 TIRAP  
YWHAZ HDAC7  
RAC1 TAF15  
NR4A1 HIF1A  
BIRC2 UBE2J1  
YWHAG SAMD4A  
ESR1 PPP1CC



CFTR DNAJA1  
PPP2R1B HDAC1  
RPAP2 POLR3E  
SMAD2 SMURF2  
DDX6 U2AF2  
CDC37 POLR1E  
SGK1 MOBKL1B  
USP11 RAD50  
DLG3 CNKSR2  
CFTR PRKCE  
PSMB1 VHL  
AR WHSC1  
SLC25A20 HN1L  
USP8 RNF41  
CD2 CD247  
GRB2 SPRYD4  
CALCOCO2 PIAS4  
FYN CCKBR  
APPBP2PCSK5  
DST MAPRE1  
FXR2 RALYL  
YWHAB MLXIP  
MCM7 INTS6  
USP2 HOOK2  
SMARCA5 CDT1  
KLHDC10 NUDCD3  
APP KLC1  
HCFC1 BAP1  
RHOQ PARD6A  
PSMA3 STUB1  
ERBB2 DOK1  
AQP1 KRTAP4-12  
HNRNPA1 NNT  
TAF6 GTF2A1  
CD34 ATF5  
KRT33B EFHD1  
RBMX RBM7  
RNF19B BTG4  
BIRC3 RIPK1  
TM4SF1 DDR1

VAV1 HNRNPK  
PRPF40A APBB1IP  
UBA52 SMAD2  
MYOD1CREB1  
PSMD6 TRAF6  
GABBR1 ATF5  
CSDA SRRM1  
EPHA2 PTK2  
CR1 CR2  
FLNA OPRM1  
SSR4 ARF6  
CD3EAP TAF1A  
CD3EAP TAF1C  
SKIL TTF2  
THBS1 CALR  
EGFR GPM6B  
RPS11 DDX56  
LPHN1 DLG3  
AKAP10 PRKAR2B  
FN1 ITGAV  
CAPN1 PTPN1  
IPO7 KPNB1  
CDH1 CDON  
JAK2 EGFR  
DDX24 VDAC3  
DDX24 BCS1L  
MYC LBR  
ATP6V1C1 PPARG  
PSMD6 TELO2  
MAGEA11 ILF3  
SSB EMD  
CYP2C9 CDC37  
DST KIAA1549  
SLC2A4HK2  
RIPK2 PSMB5  
SKIL INGX  
RAC1 EEA1  
ANXA5 KDR  
RTN3 COL4A3BP  
PRPF6 ARAF

NR3C1 NCOR2  
SH2B2 CBL  
CASP4 SERPINB9  
FGF17 FGFR1  
MAPK1 ARRB2  
EXOSC9 EXOSC1  
SNRNP200 CASP4  
STK3 CACYBP  
IL16 KCND2  
ZBTB7A SIRT1  
CDKN1A DDB1  
HLA-B LRPPRC  
RPS6KA2 CREBBP  
SKI TBL1XR1  
DYX1C1 MAP1LC3B  
KCNA4 ACTN2  
ETS1 GATA3  
UBA52 RNF11  
HNRNPM LMO3  
MCM2 CCNA1  
AR MDN1  
PDHA1 PDK1  
JAK2 ABL1  
PDHA1 PDK2  
PIAS2 TRIM27  
SORBS2 PKM2  
PPM1B MSN  
NGF ROR1  
EEF1A1SDHAF2  
PRPF40A SDK1  
LRP6 DKK2  
CBX4 CTBP1  
IL4R CD40  
RPAP2 POLR3B  
EEF1A1RSRC1  
RHOA ARHGEF2  
EGFR GAB1  
ERBB2 BLNK  
ACTN3 NRAP  
APC RILPL1

PDHA1 PDK3  
HSP90B1 TLR1  
NUP98 NFX1  
VIM OSBP2  
BMP7 SOSTDC1  
ARL4D SMAD2  
ARL4D SMAD1  
TIMM23 TIMM44  
ARPC2 RNPC3  
GH1 RPS19  
TAL1 MAPK3  
MYC HNRNPC  
DDX5 NCOA2  
ASGR1 LASS2  
MTUS2 ZFP64  
TERT PRKCA  
UBE2C ANAPC2  
RANBP1 KPNB1  
SYK HDAC9  
DLG4 ADAM22  
KCNK3 YWHAE  
EIF31 TNFRSF14  
VRK3 TSG101  
YWHAZ KIAA0232  
PSMD1 UCHL5  
DEK KAT2B  
TERT RUVBL1  
FOS ZNF277  
ABHD16A HM13  
COX6C PHB  
RPS6KA3 MAPK14  
PTP4A3 HEATR2  
PAK1 MYLK  
GNAI3 CNR1  
RYR1 S100A1  
S100A2 FKBP4  
SEPT4 SEPT8  
TP53 NUMB  
ECHS1 GRB2  
ID4 ID3

CSK PTPRK  
MYC HSP90AA1  
NR3C1 PRRC2C  
FBL DDX20  
NCOR1 RARA  
NCOR1 AR  
RBM24 RBFOX1  
EXOSC2 DIS3L  
PAK1 GIT1  
SMARCD1 CHD7  
PDGFRB CAV1  
ALB HNF1A  
TAF5L TP53  
PMS1 UBAP2L  
RAC1 RAB35  
RPS6 RPS6KA2  
YWHAB EDC3  
UBE2G2 MDM2  
GATA4 TBX5  
ATR RHEB  
SERPINA1 CANX  
TERT TEP1  
NR4A2 CDKN1C  
CHML RABGGTB  
IRAK4 TRAF6  
SMAD5 WWP1  
CTNNB1 PHF17  
ID2 IFI16  
TNFRSF1B FLNA  
HAUS1 OSBPL9  
SIAH1 RLIM  
APC AMOTL1  
NR3C1 NCOA2  
CHN1 CDK5  
IPO13 PAX3  
MAML1 NOTCH3  
RPF1 SLC6A3  
NRP1 FGF7  
DLG3 SLC25A16  
DSPP NFKB2

PARP1 PARP2  
FYN CD226  
PTPN6 STAT5B  
IKBKE MZT2B  
TRIP13 CPSF3L  
NCOA6 TGS1  
SKIL CHD3  
XRCC6 SMAD3  
U2AF2 FTSJ1  
INS CPE  
PLCG1 RGS7  
ABL2 GRB2  
CLASP2 AKAP9  
TFRC YWHAZ  
NASP TRAF6  
UBE2I PARK7  
HIST1H2AE UHRF1  
YWHAZ GCN1L1  
CASP3 MCL1  
RNASEH2A EP300  
SUV39H1 RBBP7  
HUWE1 CDC6  
CCND1 EP300  
PAK1 SMAD1  
MAP3K3 CRIM1  
PAK1 SMAD2  
FN1 RPS3  
ATP2C1 STIM1  
RDX CPNE4  
EXOSC6 UPF2  
MAP2K5 GOLGB1  
NKX2-5 HIPK2  
GLRA1 CCND1  
CLTC WNK1  
RXRA RAC3  
USF1 SMARCA1  
CUL1 HIPK2  
UPF1 GNPTG  
PKD2 CD2AP  
MAP2K1 VRK2

DOM3Z FLOT2  
GRB2 TEK  
SNAP25STX12  
C3 C2  
SFPQ CDC5L  
SMAD4 ARFRP1  
SMNDC1 SF3B3  
APC SRRM1  
DYNLL1 GNB2L1  
ESRRG NCOA1  
STX6 NSF  
SFN REEP3  
HRAS ERBB2IP  
GAS7 SF1  
MPDZ PLEKHA1  
WASL FNBP1  
IRAK1 CLN3  
CDC42 CDC42SE2  
CNBP PABPC3  
CDC42 CDC42SE1  
NCK1 NEDD9  
RPL13 GRB2  
RNF8 CCDC85B  
SOS2 ITSN1  
NEFH PKN1  
RGS14 TRAF2  
MYO1DPPP4C  
NR3C1 ZBTB20  
CYP27B1 HMG3  
AP2M1 EHD2  
NFKBIE UACA  
LSM3 UTP14A  
NCL PA2G4  
UBE2N RFW3  
CYP27B1 STAT1  
DEDD FADD  
USP8 YWHAZ  
DYNLL1 ACTG1  
EPHA3 RUFY2  
ABL1 PTPN12

SKIL FAF1  
IKBKB NFKB1  
KRTCAP2 C20ORF24  
PHB RELA  
HNRNPM TOPORS  
PRKCI MAP2K1  
THBS1 TFPI  
RPL35 TAF9  
PSMD11 GDF9  
BECN1 TSC1  
PRMT5 SIN3A  
PTEN MAGI3  
SF3A1 WWOX  
RBMX RBM7  
SNRPB ASCC2  
SRGN UBQLN4  
LCK ACP1  
SPTBN1 DISC1  
RABAC1 DUSP12  
ANKRD28 PPP6R2  
PPARG ZSCAN1  
CASP1 IL18  
ERBB4 AIDA  
ANAPC7 BAP1  
MET LRIG1  
ZBED1 SUMO2  
ERBB2 ITGB4  
VIM SERBP1  
PAFAH1B1 WDR5  
TFF2 TAC1  
EPOR ATXN2L  
MPDU1 SLC1A5  
SGSM2 PNO1  
SUPT5H PIN1  
PRPF8 GIGYF2  
MYC WDR5  
TERT RUVBL2  
RARG NCOR2  
MAPK1 MAP2K2  
SUMO2 RUVBL1



PPP2R5A TP63  
HIST1H4I ING1  
RPA1 ORC6  
UBC TNIP2  
ATP5C1MPP1  
RUVBL1 NFKB2  
ARRB2 MRPL43  
SALL2 EWSR1  
YWHAZ MAP3K3  
EWSR1 CNST  
NCK1 TNK2  
MAPK3 DUSP5  
SDC2 EPB41L1  
HLA-B B2M  
CXCR6 CXCL16  
CCNB1 RALBP1  
GTF2E1 TRIM15  
AR TCF4  
MAGEB2 RABL5  
COL2A1 BMP2  
MCM10 CEP72  
MPDZ PLEKHA2  
FABP1 GRB2  
NCOR1 MYBL2  
NR5A1 TRERF1  
CTNNB1 LEF1  
SLC16A1 AP1S1  
RNF183 EWSR1  
CXORF26 STRN4  
NCOR1 MYB  
SPAG9 TGFBR1  
GFRA2 GDNF  
GABARAP ATG2A  
MYBL2 HDAC2  
PARP1 SWAP70  
CSNK2A2 FKBP3  
ATXN7 TRRAP  
SRGAP3 WASF1  
CLTC MAP1LC3A  
SMARCA4 ZMYND11

RYR2 SMAD5  
RPS6KA5 HIST1H1B  
DMD SGCZ  
LRP8 ANAPC10  
HIST1H4I CTNBL1  
SMARCA5 MCM3  
ARFIP2 RAC1  
PSMD2 TRAF6  
CTSB ADAMTSL4  
PACSIN1 SH3BP1  
NCK1 DCC  
MAPK3 HIF1A  
MAP2K2 DUSP12  
CELF1 FUBP1  
CLN3 NUP93  
MAST1 AP1M2  
RTN1 SPAST  
SLC2A4CCDC116  
TCERG1 HTT  
BAI1 EIF3H  
PTK2 KCNMA1  
TSC22D1 C2ORF47  
SNAPC1 NR2E3  
HLA-B ATF7IP  
EDF1 NR5A1  
RXRB KLHL11  
IRS1 ROCK1  
SRC ALS2CR12  
CBL NOTCH1  
NBN BRCA1  
TCEA2 CAND1  
YWHAZ CPNE1  
BCAR3 TSN  
BAK1 BCL2L2  
SFPQ HN1  
YWHAZ CCT7  
ACTL6B CTBP1  
BCL2L1FKBP8  
VAV1 MAP2K1  
DYNLL1 HDAC6

SPTBN2 STAT1  
EGFR GRB10  
HCK EVL  
MED26 MED25  
PIK3C2A FKBP4  
CCT4 PPP2CA  
SF3B4 SF3B2  
HOXC13 ELF1  
CD44 ANK1  
EGFR PTPRS  
PSEN2 PSENEN  
GOLGB1 VT11B  
HGS TOM1L1  
JUP CDH5  
FSCN1 GNAS  
ATR IKBKG  
RABIF RAB8A  
ERBB2 CD44  
CIITA NCOA1  
CDC25B PHB2  
TRIM28 TRIM6  
GATA1 TRIM25  
WAS ENAH  
CHAF1A ASF1B  
WWP1 EWSR1  
FURIN ITM2C  
LDOC1 ZBTB16  
AKT1 PPARGC1B  
RAD1 MAP1LC3B  
OPTN ZMAT2  
CDK8 SMAD1  
CTSD SERPINA4  
CNOT3 SRRM1  
PPARG MAPK8  
AXIN1 SUMO1  
DAND5 SKP2  
FHL3 RBM42  
TBL3 URM1  
HOXD12 MAFB  
PSMD11 PAAF1

STC2 AIFM1  
NUP155 MCC  
A2M IL4  
NEK2 RHOB  
TP53BP1 NEK1  
BMPR1B RHOJ  
KIAA1267 TRAF2  
XRCC6 PIAS4  
CYP27B1 MED1  
CCND3 CDK4  
TUBA4A SMAD2  
TUBA4A SMAD1  
FOXO3 ESR1  
KDM1A ATP5J2  
MADD LRDD  
MCM7 CRLS1  
MCM7 MCM8  
HIF1A FAF2  
GRB2 GRB7  
SMAD3 TGIF1  
CRK AGPAT4  
GFAP PRKCA  
ARNT SIM1  
CAV1 GRB7  
NUP98 NUP133  
PRKACA PDC  
CFLAR SF3B1  
ATG7 GABARAPL2  
CNP PTK2  
BPTF SMAD2  
DLX5 SOX8  
UBE2U TRIM47  
HNRNPF ZNF689  
AR AKT1  
PPP1CAT PRN  
CHST12 UGGT1  
SOCS6 RBCK1  
SKP2 COPS6  
ITGB1 ITGAV  
BHMT BBS4

ZW10 PHLDA3  
EEF1D HEXDC  
RPAP2 PDRG1  
CDC45 TSC22D1  
EEF2K CDK1  
MYC PDCD11  
ABL1 DNMI  
ANKMY2 RAPGEF2  
AR RCHY1  
GDI2 PRKAB1  
HNF4A PPARGC1A  
ACTN1 PALLD  
VHL CHMP2B  
RPS4X MAP3K1  
IMMT RER1  
SEC24ATRIP13  
PSMD6 UCHL5  
PDCL IKBKG  
GH1 MAPK3  
DYSF CAV3  
SMAD3 GMEB1  
CDC42 PAK6  
RHOA RASGRF1  
SERPINH1 CDK9  
UBE2H COPS5  
SF3A2 HMG20B  
NR5A2 PROX1  
SNRNP70 SRSF2  
NT5C2 NME7  
PPARGC1B ZNF513  
GADD45G KAT5  
FGF19 FGFR4  
EP300 CALCOCO1  
CBFA2T2 CBFA2T3  
OPRL1 PNOC  
CHD1L PARP2  
FZD6 SFRP1  
HCK PLCG2  
EGFR PLD1  
GABRR1 CSNK2A1

BZW1 MAGI1  
SNAP25SYT3  
PEX5 PEX13  
CTNNB1 TNIK  
CPE BDNF  
PIAS2 PGR  
LMO2 DAZAP2  
CAST CASP3  
FKBP1A ITPR1  
CNOT2 CNOT6  
CDK1 TOP2A  
IL4 IL4R  
DEAF1 LMO4  
CSNK2A2 TCF7L2  
DEK CREBBP  
PTPN1 GLRX  
CDK8 MED25  
STAT4 IL12RB2  
LASP1 ZYX  
CDK1 NDE1  
RFC2 DDX11  
DLG4 CRIPT  
CHD3 SDCCAG3  
SMAD9 TINAGL1  
AES SH3GL3  
GRB2 GAB3  
RHOA ARHGEF1  
TPM1 TNNT2  
HIST1H4I GATAD2B  
PSMD14 PSMD10  
MYC SMC1A  
POLA1 RBMS1  
FIBP KIAA0528  
RASA1 ARHGAP1  
RNF4 NFATC2IP  
PRKAB2 SH3PXD2A  
TRIM24TRIM28  
RPL8 PTPMT1  
MYST2 C9ORF82  
ABL1 DOK3

DEK HDAC2  
MTOR RPS6KB2  
NR4A1 BCL2A1  
FASLG DAXX  
F13A1 F13B  
FCHSD2 MAGI1  
RGL2 HRAS  
HAP1 STX5  
GNAQ TTC1  
RPA2 TP53BP1  
RAD23B PSMD1  
LPHN1 ANKS1A  
TAF1 RBL1  
ACTR2 IQGAP2  
EPS8 PCM1  
BCL2L1BAD  
SIGLEC5 TRIP13  
EPHB2 EFNBI  
CASP3 HNRNPU  
RPS27ANDFIP2  
HNRNPA1 PABPC4  
PLCB3 MKNK1  
LSP1 DAXX  
ZBP1 RIPK3  
CTNNB1 AJAP1  
IMPDH2 VHL  
GNAI2 ADRA2A  
GSK3A MAP3K11  
CTNNB1 FBXW11  
CD40LG RNF128  
TMPO SGTB  
ANXA2 CEACAM1  
ORIG1 OBP2A  
NAPA STX4  
MYH14 PLEKHA5  
ESRRA PROX1  
RPS27ARELA  
RPS27ASMURF2  
A2M SPACA3  
BRAF AKT1

GNAI3 S1PR1  
TYMS TNIK  
GTF2I USP7  
EPS15 UBE2H  
EFEMP2 RERE  
TCP1 PPP2CB  
PSMC5 PSMD6  
MBP PBK  
RHOA CASP10  
GFI1B AGPAT6  
NFKB1 NCOR2  
USP8 CHMP4B  
SLAMF1 INPP5D  
DDX56 HECTD1  
IL16 PPP1R12C  
NCOR1 NCOA3  
DCN SFTPD  
NFATC1 GNB2L1  
HNRNPK DIDO1  
MAP2K2 DUSP3  
APP LRP1  
SYNJ2 NCK1  
STC2 EIF2B3  
PSMD10 PAAF1  
AKT2 SH3RF1  
CAMK2B CAMK2D  
MGRN1 UBE2D2  
PRKCG CCHCR1  
BCL2 MAPK11  
GRB2 COBRA1  
CSF1 GAB3  
LYN NEDD9  
CTNNB1 APPL1  
STXBP3 PRKCA  
SCN4A DLG1  
CCT3 TBK1  
PPA1 HDAC6  
POLR2E POLR2G  
LSM1 UXT  
NTRK3 KIDINS220



XPO1 AIRE  
ITGB4 ERBB2IP  
EFTUD2 MEPCE  
CBX3 L3MBTL2  
LNX1 KRTAP4-12  
PTPN6 CAV1  
PDLIM1 STK35  
PRPF40A PTPRF  
TCF21 TCF3  
MEOX2 RND2  
ZBTB25 TRAF2  
SLC4A2 EPB42  
EGFR MAPK8IP2  
SNF8 VPS25  
LYN PDE4A  
BAP1 IPO4  
TUBGCP3 AKAP9  
SPG21 GGA2  
PEBP1 TMBIM4  
RNASEH1 G3BP2  
ATXN1 STAC2  
EIF3F EEF1A1  
SORBS2 SFN  
GNB2 GNGT1  
SET PPP2R5A  
UBE2D3 UHRF2  
HNRNPH3 UTP14A  
EDF1 TBP  
GNB2 GNG3  
SYK VAV2  
HNF1A STAT3  
RB1 MRFAP1  
TNNT1 TNNI1  
RXRA NRBF2  
MAP3K7 FKBP5  
TEAD3 TNIK  
JUP WDYHV1  
SF3A2 NRIP2  
EIF1B EIF3I  
A2M APP

TPM1 PKD2  
KCNA5 DLG1  
RBMX SRRM2  
EEF1D CAMSAP1L1  
GABARAPL2 STK4  
ID3 GNB2  
ARNT NCOA2  
AKT1 IKBKG  
MAPK9 SMAD3  
APEX1 MUTYH  
SKP1 BCOR  
JAK2 BRCA1  
SAR1A TRAF6  
LCK CSF3R  
HCFC1 THAP11  
STMN1 PRKACA  
ITGB1 ARHGAP5  
CSNK1E ANKRD6  
TGFB1 ARHGAP15  
TGFB1 NEK8  
PMS1 HELB  
TRIM29 CEP70  
PBX2 UBE2E1  
SUV39H1 GFI1B  
RAP1A FTSJ1  
SNAP23 SCAMP1  
C1ORF174 GOLM1  
BCL2 PPP2R5A  
COPS2 IKBKE  
AHR NEDD8  
ESR2 PIAS3  
CDK1 BIRC6  
SF3B4 SUMO4  
IGF2 PCSK4  
GSK3B TRAF2  
DVL2 ARRB1  
LYN FCGR2B  
WDR5 NLE1  
HLA-B NPEPPS  
DKC1 LYPLA2

PPP2R1A PPP2R5D  
MCM3 ORC2  
REL WDR37  
RUVBL1 TRAF6  
KRT15 KRT20  
RAB1A RABGGTA  
BRCA2 HMG20B  
KIF3B MAP3K10  
APOE LOXL4  
PAK1 SMURF1  
CDK1 CUX1  
PAK4 SFN  
RNPS1 NFKBIL1  
RBL1 SUMO3  
PAK4 YWHAB  
HNRNPA2B1 CSNK2B  
STX5 VTI1B  
CHGB MGLL  
DVL2 MCRS1  
PPP1CARPAP3  
FAM107A VIM  
STAT2 CREBBP  
ECHS1 YWHAZ  
PMCH PCSK6  
PRKCD CKLF  
PMCH PCSK1  
BACH1 TP53  
CBL CRK  
CBL CRKL  
RAB3A RABIF  
SSRP1 SREK1  
CIITA RFX5  
CNOT4 UBE2B  
LALBA B4GALT1  
SGK1 IPO4  
NUDT3 RAB17  
BCL2L1MOAP1  
HLA-B CACYBP  
YWHAG ARHGEF2  
HRK BCL2A1

RALYL EWSR1  
ARL1 SCOC  
RALY SPG7  
SH2D1B LY9  
NUP98 SEC13  
HLA-B GRPEL1  
VEGFA KDR  
DAND5 RAD51  
LAMA4 MED31  
HNF4A CITED2  
MAP4K4 ITGB1  
USF1 GTF3C1  
HSP90AB1 AKT1  
ESR1 GADD45A  
RPS27AFANCI  
VPS41 AKTIP  
TUBB ASCL2  
HSPA9 TAB2  
SRP14 VHL  
CIT RHOB  
SGK1 EIF3F  
TRIM26MEPCE  
UEVLD DTX3  
PFN2 MYPOP  
MYC MED16  
BAX PMAIP1  
LTA4H IKBKE  
STAMPB CLINT1  
ARL4D ARL6IP1  
DCN MMP3  
C20ORF24 EHD4  
DCN MMP2  
ELL SNF8  
KIAA1377 KLHL20  
CDK1 INCENP  
PRKAR1A AKAP4  
DLGAP3 PTK2  
HSPA5 MAP3K14  
NUP214SMAD2  
SERPINA3 CELA1

JUP BIRC2  
CUL7 FBXW8  
NF1 TBPL1  
PTN DUSP12  
RB1 PPA1  
RGS3 EFNB1  
NAP1L5 IKBKG  
LPHN2 SHANK1  
POLR2B MED29  
RGS10 PRKACA  
DLGAP1 DYNLL2  
UBE2I HDAC5  
KRT20 AMOTL2  
SH3PXD2A MED28  
PTPRB MAPK3  
PCYT1A ACTB  
PCM1 CEP72  
KIAA1377 LUC7L2  
RUVBL1 TELO2  
USHBP1 USH1C  
AKAP6 DTNBP1  
ATXN1 FAM46A  
IFNAR1 JAK1  
ORC2 TERF2  
RAD18 FANCI  
YWHAG ING1  
CCNA1 SKP2  
NCOR1 TP53  
IKBKAP BAG6  
TNFSF11 AKT1  
SYNCRIP KLHL3  
PLSCR1 TRAF4  
MYST2 ZBTB8B  
COLEC11 PIAS4  
TERF1 ACD  
MVD EIF4EBP1  
RASSF5 GABARAPL1  
SMARCA5 H3F3B  
EFEMP1 GF11B  
RPA2 FYCO1

ECT2 KLHL20  
CD34 CREM  
TGFB2 DAXX  
QARS IKBKE  
SUV39H1 THRA  
GRM5 PRKCQ  
PARP1 TRAF6  
RELA DDX21  
MED12 TRRAP  
SKI NFIX  
COL2A1 ITGA2B  
SGTA EFEMP1  
E2F3 CREBBP  
KRT18 CAMK2A  
SRGAP2 YLPM1  
FGFR3 STAT3  
LCK DEF6  
ORC1 HAUS1  
SUPT3H ATXN7L3  
CCNA1 EIF3I  
MYC KDM2A  
BMP7 CHRDL2  
UNC119 HLA-DQA1  
LMO2 RBBP8  
ENG TGFB2  
ABL1 FYN  
SHBG CD177  
DDOST TMBIM4  
TH1L TSG101  
PAK4 DLST  
ESR2 NCOA3  
TNNT1 WNK1  
ZW10 TSC22D1  
PLSCR1SRC  
NCR1 FCER1G  
RAE1 POLA2  
TNFSF12 TNFRSF12A  
PKLR KIF23  
HIF1A EGLN2  
KIAA1377 GIT1

EDA EDAR  
CDK1 RUNX2  
DVL3 C16ORF48  
RXRA NRIP1  
RAB9A RHEB  
ABL1 DOCK3  
PRKAB2 ULK1  
TGFB2 FMOD  
PDCD6 SH3KBP1  
CTNNB1 RPS27A  
FN1 COL4A6  
BRF2 FANCI  
AFF3 WNK1  
BRF2 ATAD3A  
CCDC85B TUBGCP4  
TUBGCP4 RPRD1B  
GNGT1 GNAS  
ATG12 IFIH1  
MON1BVPS11  
ERBB2 PLCG2  
SNAP23SCAMP2  
HSPA5 TNFRSF1B  
DMPK UBQLN4  
STAT5B ELP2  
RELB SMARCD1  
MON1BVPS16  
MAP3K3 PDRG1  
BAI2 STARD13  
PSMA7 PSMB3  
PRC1 KRT20  
SETDB1 CCDC106  
TP53 ANK2  
MAP1B STK4  
ADRB1 DLG1  
TCEB2 CISH  
HDAC1 GATAD2A  
USP5 TNFRSF10D  
PRKACA SPTBN1  
POLR3G POLR3C  
PIK3R1 SOS2

CCNB1 FOXM1  
AGTRAP PBX3  
ABL1 ZAP70  
ITGB7 TLN1  
PTN CHD3  
ORAI2 MED31  
MPP5 PARD6B  
GP1BA YWHAE  
USP14 USP7  
RNF40 NCBP1  
APP COL4A2  
FOXRED2 SEL1L  
MSH4 MLH1  
UBE2D1 RNF185  
SARS UBA5  
ORM1 CCR5  
TGFB2 AP2B1  
STRN3 MOBKL1B  
ATN1 PLEKHA5  
PIK3R1 SOS1  
ERBB2 PTPN18  
PSMB5 PSMD6  
KTN1 PLEKHA5  
MAP2K7 SYNE1  
A2M UMPS  
SCAND1 NFE2  
RZR3 RZR2  
GABARAPL2 NSMAF  
GADD45G HAP1  
CDKN1B TSC1  
HLA-C CALM2  
FBL BAZ2A  
ITGB7 RABGAP1  
ATG7 CLN3  
EPB41L2 PRKCH  
ARPC5 MAPKAPK2  
ATG12 SNRPB2  
CUL4A COPS3  
APAF1 HSPA1B  
CSNK1A1 AP3B2



YWHAZ LMO7  
EIF3A EIF3L  
CTNNB1 TOB1  
YWHAQ MAGOH  
RAB11FIP4 RACGAP1  
UBE2E1 RNF114  
DRD2 KCNJ5  
ZW10 MAD1L1  
SLC25A37 EWSR1  
DRD2 KCNJ3  
PIP5K1B BTK  
GTF2E2GTF2B  
NUP93 PHB2  
COPB1 COPZ1  
RAE1 NUP93  
MYD88 TLR10  
SMAD7 RNF111  
PIK3R1 ARHGAP1  
EIF3B USP3  
RAB11A RAB11FIP2  
UBE2E1 RNF115  
ARF6 NUP93  
C2CD2L EPB41  
BMPR1B RAN  
AGT CTSG  
IL17RB IL17B  
HIST1H1B L3MBTL1  
ABCD1 ABCD2  
MELK ZNF622  
SH3GL3 CALCOCO1  
ACTN3 MYPN  
RPS6KA3 HIST3H3  
ETS1 DAXX  
EGFR SLA  
DAXX MYH15  
HGS RAB14  
CDKN2A CDC5L  
GABARAPL2 TBC1D5  
NONO ZNRD1  
RABGAP1L RABGAP1

RELB TIMM50  
IVL SPRR3  
SNAP23STX18  
ATF7IP ZNF350  
FANCA TOP3A  
STAMBP ALAS1  
SP3 GABPA  
FYN SNX17  
C3ORF26 HES4  
GSK3B GEMIN4  
PLCG2 GAB2  
EXOSC5 MPP6  
CASP3 BMX  
MAPK10 COPS5  
HSPA4 PARK7  
SUV39H1 RB1  
HOMER1 TRPC5  
ARRB2 ARF6  
GRB2 SPARCL1  
RPS6KB1 MXD1  
KRT15 LNX1  
PPIB USP21  
ABL1 RAD52  
LRP6 RPS27A  
CAV1 AQP3  
KRT34 USP15  
RHOT2 TRAK1  
VPS41 VIPAR  
NIN BICD1  
NFKBIE HDAC5  
HDAC4 RUNX2  
LRP6 RPS27A  
FAF2 FAF1  
ACTG1 PPP1R9A  
BEND3 USP21  
HOXD4 RXRG  
YWHAB CSNK2A1  
PLSCR1NOC4L  
FASLG SNX9  
DTNB KIF5A

G3BP1 TRAF6  
TRIM37 FXR2  
MAP4K3 ITSN2  
CRK GLTSCR1  
BTK DAPP1  
CCT4 PPP4C  
PTPN3 VCP  
JUND MAPK1  
SLC9A3R1 PIK3CA  
RAB4A STX4  
NADK LNX1  
HDAC4 CACNA1C  
SNAI1 HOXD4  
DCAF7 YWHAG  
UPK1A UPK2  
A2M NANOS3  
VCL CLTC  
ATXN3 KCTD10  
PARP1 SUPT16H  
ATG13 GABARAP  
RUVBL1 TRRAP  
LNX1 INPP5K  
HIST1H4I HDAC5  
SH3RF1 MAP4K3  
APPL1 TRAF2  
EIF1B ATP5D  
PSIP1 SRSF1  
SMURF2 RASL12  
EIF1B DDT  
CAPN1 PALB2  
PRKCG TIAM1  
TP53I3 FUNDC2  
SNRPF PHLDA3  
PRSS1 SPINK5  
TTR ST3GAL3  
PAX8 WBP2  
RPS6KA2 BAD  
CAPZA1 UIMC1  
SOCS1 RELA  
RAB5C TRAF6

EPOR PTPRO  
ELP3 SMURF1  
LYST MRPL17  
BCL2 PML  
FGR PTK2  
USP19 SRPRB  
STK3 MAP1LC3B  
PPP6C TBK1  
MCAM PTK2B  
PRKCSH TRAF6  
ATF3 ID3  
IKZF3 HDAC5  
PRPS1L1 GORASP2  
SLBP ZNF473  
IFNGR1 RAC1  
FOS RGS7  
RPS5 MAP3K14  
ETF1 GSPT2  
KHDRBS3 LNX1  
SERPINH1 UBQLN4  
SMAD6 YAP1  
CUBN LRP2  
MCM6 ALS2CR11  
NFKB2 SIN3A  
DPYSL4 DPYSL5  
ADRA2A PRKCD  
TLR4 SYK  
YWHAG RASAL2  
SMAD7 SMAD3  
PGAP3 CSNK1D  
ZRANB2 U2AF1  
HLA-G LILRB2  
PCM1 ING5  
YWHAG BAD  
XRCC5 COIL  
ARL1 C20ORF24  
MTMR9SPG21  
WBSCR22 FOS  
SOX8 HHEX  
HADHA USP49

RAN XPO6  
DSTN TNIK  
YWHAB CWC22  
AKAP9 TNIK  
MAP1B MAGOH  
TLR2 TRIP6  
TOP2A YWHAE  
CLSTN1 KLC2  
TYK2 GNB2L1  
HLA-B TARS  
CLSTN1 COL17A1  
RRP1 LYAR  
GAS7 NCKAP1  
EIF1B CMPK1  
TRAF1 CASP8  
EIF1B ECHS1  
MCM2 MCM6  
KCTD10 USP25  
IL16 USHBP1  
PLD1 PIP5K1A  
TIPARPXRN2  
POLR3D HNRNPAB  
SSB H2AFX  
CALML5 MAGED1  
PSME3 UBE2Z  
SMAD9 PSAP  
KAT2B SIRT1  
YWHAE KIAA0232  
PTGFR PTGES2  
PPP6R3 USP49  
CCDC85B RIBC2  
MYC TAF9  
VAPB OSBPL9  
CACNA1A PPM1A  
HLA-B VARS  
MAP2K1 CPNE1  
SGK1 PAICS  
ATG12 ATG5  
GFAP PDLIM7  
NFKB1 EEF1A2

RFXANK DCTN1  
ESR1 PPARGC1B  
ATCAY STUB1  
RNF152 UBE2W  
SMARCA5 RSF1  
RAB25 RAB11FIP1  
SEPT2 STX1A  
KHDRBS3 BAHD1  
PPM1G USP7  
UBE2V2 ZNRF1  
PPP2R1B PPP2R5C  
SETDB1 BTBD2  
PTPRB CNTNAP1  
TSC22D1 SLC25A10  
YWHAG COPS5  
TRIP6 FAM46C  
USP19 TNPO3  
JAK1 INPP5D  
MLH1 PRKDC  
RPN1 UBQLN2  
TF IGFBP1  
IRF8 ZBTB17  
EGFR SHC2  
TP53 MLL5  
ZEB2 SMAD3  
MORF4L2 MRFAP1  
CASP3 MAP3K14  
DLEU1 UTP14A  
KPNA3 AICDA  
POLR2L CCDC85B  
ESRRA APC  
SMAD9 ASH2L  
YWHAZ PKP2  
AQP2 RPS27A  
HERPUD1 USP7  
GTF2F2 MSX2  
IRS1 GRB10  
CSPG4 ATF7IP  
SHC2 NTRK2  
MYOD1 ELSBPB1

DKC1 LYAR  
SMURF2 NKIRAS1  
PCSK6 RCN3  
ATF6 NFYA  
RB1 PPP1CB  
CHEK1 DNMT1  
GRIA2 NSF  
MYC RUVBL2  
STAU1 MAPT  
HMGA2SMAD5  
LMO4 NFYC  
LRPAP1 LRP8  
USF1 BPTF  
PSEN2 FBXL12  
GPI IGFBP3  
SET CDK5R1  
FXR2 ZSCAN1  
BCL6 CHD3  
RB1 PPP1CA  
JAK2 STAM2  
MAP2K4 MAP3K1  
THOC7 NIF3L1  
STK19 SLC29A1  
TRAF3IP1 CDC5L  
RELA ZNF277  
NGFR MAPK1  
RBBP6 ANAPC16  
SMARCA2 BAZ1A  
FAM40B STK24  
IKBKE EIF3M  
HTN1 MUC7  
EGFR AIDA  
BMPR2 LSM10  
SLC34A1 SLC9A3R2  
EEF1A1MYSM1  
SAP18 TADA3  
KPNA3 CDKN1B  
ARRB1 RALGDS  
EP300 TAF1B  
DAND5 GABPA

WDR61 RIPK3  
LYN PIK3CG  
H2AFX UIMC1  
SOD1 HECW1  
ZBTB16PGAM5  
ATN1 CENPJ  
RNF216RNF11  
GBP2 HSPE1  
ADAM12 FSTL3  
NCK2 RTN4  
HMOX2COPS6  
POU1F1NR1B3  
EIF1B MTDH  
TRAP1 TLR1  
BRCA2 BCCIP  
HSPA4 TTC1  
EZR SDC2  
CTBP2 KLF3  
IGF2 VTN  
SKIL MACF1  
MYC RUVBL1  
EGFR HBEGF  
PTP4A3EPPK1  
MET GLMN  
WWP2 SCNN1B  
JAK1 STAM  
SETDB1 QTRT1  
FOS TUBB2B  
CCNA1 TRIM28  
HSPA9 HSPBP1  
NFYA SRSF1  
RAD51C RAD51  
THRB NRBF2  
MYO1CCIAO1  
CECR1 SRRM2  
MCRS1 DAXX  
SYN1 MAPK3  
APP ADAM17  
SERPINB9 CRMP1  
VIM C7ORF36



NCK1 DRD3  
DRAP1 TAF9  
HNF4A PRMT1  
DAND5 KLF10  
SESTD1PLEKHA5  
TRAF4 SMURF2  
RB1 RBBP5  
ARIH2 UBE2R2  
APEX1 PAK2  
MARK3RASGRF1  
VHL MRPL32  
DMRTB1 PRMT2  
FYN CSF2RB  
DHX16 SRRM1  
TXLNA IKBKG  
KIAA0090 TMBIM4  
SRC ASB16  
TRAF5 TNFRSF13B  
HDAC3 L3MBTL2  
GABARAPL2 STK3  
CEACAM5 EWSR1  
HMGB1 CUX1  
G3BP1 USP10  
DAND5 REST  
GNA11 TRPC3  
UBAC1 MYH2  
PFN2 RAP1GAP  
POLR2I WDR48  
RPS27AMST1R  
NFKB1 BANP  
GSPT1 PRKAB1  
EPS15 UBE2D2  
TXN YWHAZ  
CUTA PINX1  
RTN1 PLEKHF2  
IGHG1 IKBKG  
ARHGEF5 MED28  
TP53BP1 DCLRE1C  
RUVBL1 TAF9  
CDC73 KIAA1549

POLR2B MED9  
FN1 ITGB6  
JAK2 IFNGR2  
PRKCZ TIAM1  
NDRG1 RUVBL2  
HSPB7 HSPB8  
CDKN2A UBE2A  
TCF4 RNF138  
TP73 ABL1  
FANCA BRCA1  
MCRS1 C19ORF50  
CENPA AURKB  
NCK1 VPS13A  
FANCA BLM  
XIAP BIRC2  
CAPN1 CASP14  
F8 ADAMTS13  
VTI1B STX8  
TJP1 GJD3  
STAT6 ZBTB2  
PIK3R1 GABRA3  
ARNT NCOR2  
HIST1H3J MSL3  
RB1 DNMT3A  
FBP1 ASCC2  
PRDX2 IFIT5  
CCNA1 GPS2  
A2M MLST8  
PSME1 USP22  
MNT MLX  
CRKL ARHGAP32  
ADAR UPF1  
CASP4 UBXN1  
FYN TYK2  
CTBP2 AKTIP  
ATXN1 USP54  
NFKBIE HSPA1B  
CEACAM5 HNRNPM  
FEZ1 DISC1  
ERBB2 RASA1

POLR2C RPAP2  
IL7R TSLP  
PRKCD RUNX2  
SGCG SGCD  
PSMD10 RELA  
A2M TRAPPC5  
AFF1 MLLT1  
HDAC1 DZIP3  
L1CAM ANK2  
EPS8 SHB  
ABLIM1 KCNJ12  
AKT1 NCOR2  
CSTF2 CHD3  
BAG3 UBE2I  
UBE2H MARCH2  
IRF5 MYD88  
KIAA1377 RUVBL1  
SNRPF LSM5  
DNAJB1 MAST1  
RUNX1 TLE2  
SOD1 DNAJB1  
RUNX1 TLE1  
SUV39H1 HDLBP  
ZBTB16DPM1  
YWHAE ADRM1  
PKM2 PIN1  
HOXB2 MNDA  
UBE2D1 RING1  
CNTNAP4 MACF1  
HDAC3 SAFB2  
EPB41 DLG1  
HSPA5 TRAF2  
SYTL2 NRXN1  
DCN COL1A2  
MTA1 SH3GLB1  
MAPK10 CREBBP  
TBCA TRAF6  
SERBP1DAXX  
PIK3R1 GLTSCR1  
GPR143 SUCLG2

SKIL TRAK1  
PMS1 IPO9  
DNAJB6 HDAC4  
CIC SEC62  
PMEL PRKACA  
NAPA VAMP8  
HLA-A ERBB2  
ATP5A1 YWHAG  
SFPQ SRRM2  
CHD1 ARRB1  
RPGR SLC25A10  
MAPK8 TFCP2  
DYNC111 DYNLL2  
TADA2A NR3C1  
IL8 CCL4  
WWP2 SCNN1G  
NCK2 PDGFRB  
FES PIK3R1  
TCEA1 TCEA2  
EIF1B VAMP3  
HNF4A PNRC1  
PRAF2 CANX  
PPP1CAPRKCD  
MED24 MED26  
ARHGDIA RHOB  
RHOA RHPN2  
CHRNB4 CHRNA2  
AKR7A2 HLA-B  
TP53 ASPM  
TOX4 HIPK3  
IGLL1 MYOC  
GCN1L1 TNFRSF14  
CDKN2A ING1  
HNRNPH3 ANXA11  
RPS27AHIF1AN  
MLLT10 SMARCB1  
ECD HSP90AB1  
HDAC2 SMARCC2  
FXR2 NONO  
NFKBIE TUBB

PLCG1 GPRIN1  
MYOG CALM2  
YWHAZ MADD  
TRAF2 CCDC33  
HNF4A SREBF2  
MLEC TRAF6  
CHGB ATXN2  
UBR4 MCRS1  
CRP LEP  
VAMP2 STX1A  
MT-ND5 GLUL  
HNF4A FOXO1  
NF1 SMAD4  
EMD COPS6  
UBL5 CLK4  
RALA RASSF5  
FAS BRE  
PCNT PCM1  
SKIL THSD7A  
SEC61A1 SERP1  
SCAND1 ZNF629  
IKBKE SEPT2  
FLNC HIPK3  
CPE ROBO2  
AMH AMHR2  
RPS27A IRAK4  
GTF2H1 FUBP1  
PIK3CARASD2  
BAG6 UBQLN4  
CBX4 HIST1H3J  
TP53 SMARCA4  
ANK2 OBSCN  
MTHFD2 PARP3  
ERBB2IP PKP4  
KRT15 C1ORF216  
MYC UST  
IKBKE PSMD6  
HAX1 TSC22D1  
FBL RELA  
LRRC68 BEND7

TBL1X SKP1  
RPRD1A GSTK1  
TP53BP1 USP28  
MMP1 CMA1  
PTP4A3 FANCI  
MED24 CYP27B1  
PTP4A3 ATAD3A  
XRCC5 BRCA1  
NAA38 EMD  
EIF1B TBCA  
RPS6KA5 CREBBP  
HSPA4 TAB1  
CHEK1 RAD51  
SMC2 TFE3  
PYCR2 CIC  
EIF4E RPS6  
CDC7 CDK2  
RALA CNKSR2  
KHDRBS1 CREBBP  
CASP3 RNF2  
TANK HSPA1B  
PRPF6 AR  
TNF PRTN3  
VCL CORO2B  
AKR1B1 SMAD1  
PTP4A3 DNAJC11  
CENPA CENPN  
LTF LIPA  
CNNM3KRTAP4-12  
RAMP3 CALCR  
HGS STAM2  
MYL5 IKBKG  
ITGAM IRAK1  
EMD DPPA4  
UBE2N RNF43  
ACTN1 TTN  
AHI1 SMYD2  
RPAP2 PIH1D1  
CREB3L3 CREB3L1  
SF3B3 TNFRSF10D

UBR5 UBE2E1  
ERC1 KBTBD7  
DAB2 DVL3  
PAK3 GIT1  
VPS72 EWSR1  
ABL1 ABI1  
E2F1 SP2  
PARP1 PARP3  
MYST2 VIM  
TRIM27CHD4  
YWHAZ CGNL1  
RUNX1T1 NCOR2  
FLNA DRD3  
SHBG ATP5A1  
SIPA1L1 NRXN1  
GSPT1 TRAF6  
TRIM63GFM1  
RNF183 C19ORF50  
CACYPB TNIK  
PTPN6 LILRB2  
DYNC1H1 BICD2  
CSNK1A1 SYT9  
GFI1B IFFO1  
TCEA1 SF3A1  
CDKL5 ABL1  
STAT4 MAPK14  
TGFA ADAM17  
TH1L PHB2  
NFATC1 PARP1  
ARF6 SEPT2  
WDR5 PASK  
NCK1 KHDRBS1  
CTTNBP2 STK24  
ACAN TNR  
YWHAE TSC1  
SLC1A2GRB2  
PES1 WDR12  
ITGB3BP FUNDC2  
PPP1CCMAX  
TJP1 CGN

BAG6 C19ORF10  
PCNA POLD2  
SF3A2 C19ORF43  
PRKCG CYTH2  
BCKDKFAM98B  
PPP4C PPP2CB  
EGFR PAK1  
KAT2B CDT1  
PFN2 DLST  
PIAS1 AKT1  
ZFP36 EDC3  
PF4 FGF2  
PPP1R8 EZH2  
HLA-C SEC14L3  
IKBKE EIF4H  
MAP2 CFBF  
PIP5K1C AP1B1  
CBX5 TRIM28  
VIM KIF15  
CSNK1E AXIN2  
SMAD7 ITCH  
PPP2CAFAM40A  
FYN ATXN1  
RBBP5 ASCL2  
CDK2 MSN  
HSP90AB1 TSSK6  
IKBKE KARS  
TUBA3C IKBKE  
MED24 ESR2  
SNAP23NSF  
RNF128 UBE2T  
KLF11 MAPK1  
PLAT MAPK1  
UMPS CDC42EP3  
POLD2 POLDIP2  
TIMM17A PAM16  
SYK PIK3AP1  
ADRBK1 GRM1  
ARNT HEY1  
GSK3B AKAP11



GRB2 ITIH4  
SVIL WNK1  
TNK2 SNX9  
SULT1E1 ENOX1  
HAPLN1 ACAN  
KCNH4 HDAC1  
SUMO2 RAD54L2  
RILPL2 HEXDC  
MSX2 ZBTB17  
POLR2E ZSCAN1  
RPS9 MEPCE  
ZIC3 GLI3  
HSPA5 ERP29  
SIP1 DDX20  
PRPF4 SNRNP27  
CIAO1 NDUFA9  
EIF3I EIF3A  
EGFR AR  
ATG12 ATG10  
MAP3K10 RACGAP1  
EED EPC1  
CHD8 CTDP1  
PRKAR2A RAB32  
PHACTR2 GRB2  
XRCC5 POLE  
ARNT TRIP11  
MAPK3 PTPN5  
TRAF3 ZMYND11  
UBE2D1 OTUB1  
CBFA2T2 FBXL19  
KBTBD6 KBTBD7  
SHC1 MAPK14  
SLC16A8 RAB1A  
IKBKE PDIA6  
EIF2B5 EIF2B3  
SMC2 ARF6  
CDK5 MEF2A  
MAGI3 FZD4  
CRH CRHR2  
RB1 MRPS18B

SUMO2 ZNF451  
CDH2 GNA13  
NPHS1 MAP2K4  
UBAC1 MCTS1  
GIPC1 ITGA6  
UBE2V2 RNF2  
ATXN7L3 SECISBP2  
RAN RANBP9  
COL8A1 KRTAP4-12  
PTPRE GRB2  
HNF1A RAC3  
HNRNPU PTPN11  
HOXB6 PKNOX1  
SS18L1 SMAD3  
HTR2A PPP5C  
SRF CASP8  
EIF1B PPP2R1A  
LIN7A ABCA1  
MYC KIAA1967  
GRB2 SMAD3  
S100P SUGT1  
NFKB1 UNC5CL  
RIPK2 TRAF1  
PIN1 UBQLN4  
NR3C1 RXRB  
ZBTB16CEP70  
CENPA RING1  
MCC WDR5  
TRAP1 SF3A2  
CLN3 ILVBL  
SLC15A2 PDZD3  
HDAC3 HDAC10  
HLA-B SEC13  
NFKBIE PPP6R1  
ELANE CSF3  
RAF1 MAP2K2  
PRKCG PARD3  
MLH1 NONO  
EXOSC4 GTF2IRD1  
CD3D CD8B

ITGB7 DOK1  
SNAP23ABI3  
YY1 HDAC5  
RAB1A RFK  
ADRBK1 GNAQ  
FER CTTN  
GSK3B CDX2  
VIM FUBP1  
POLR1A POLR2E  
CSTF2 UBQLN1  
RPS6KA5 CREB1  
SAP30 SAP30BP  
MAPK9 XPO7  
TP53 BRCA2  
BMPR1A FKBP1A  
PAXIP1 SH3GL2  
EGFR CLNK  
SMURF2 LMCD1  
SS18 TTC14  
HNRNPA1 TARDBP  
BCAR1 CSPG4  
PJA2 UBE2W  
KIAA0240 CDC5L  
CNP MTNR1A  
TRAF2 TAB3  
ACCN1 PICK1  
ME2 USP15  
ZW10 BUB1B  
CDK2 TBCA  
DAD1 IKBKE  
PSMD1 PRKAB1  
CNOT2 CNOT8  
AXIN1 RNF111  
SGK1 LETM1  
NR1H2 GRB2  
TXK YTHDC1  
A2M PAEP  
EHD4 PHLDA3  
GABARAPL2 CALCOCO2  
MRPS14 USP42

FAS INSL6  
CTBP1 ZFPM2  
SRC CSNK2A1  
KDM6ASIX4  
RPF1 UBE2L3  
DLEU1 KIAA1377  
NFKB1 PLD3  
EGFR YWHAZ  
UBE2D2 UBA6  
UBE3A ESR2  
TSHR GNAS  
ABL1 HOXC8  
AXL TENC1  
SNAP25RIMS1  
TNFRSF10A CASP8  
TRAF5 SMURF1  
RUNX1T1 THRAP3  
RUNX1T1 WBP11  
SALL2 CEP76  
NFATC1 PRKCA  
ZFYVE9 FOS  
GLUD1 MAP3K14  
SMARCA4 HIC1  
RPL35APINX1  
CDC25B BRSK1  
ACTN4 NEB  
APC ING5  
PLEKHF2 MBIP  
RPL5 UPF2  
CCNA1 HIST1H2BA  
PSTPIP1 RPL37A  
CYP27B1 NCOR2  
SMAD5 SUV39H2  
LAMA5 BCAT2  
MAPK9 BAZ1B  
DLG2 CNKSR2  
SSX5 PCBD2  
TAF1 MAX  
BMI1 MLL  
PSMA3 GF11B

LZTS2 RNF32  
ABHD16A TMEM147  
NAPSA YWHAZ  
RUNX1T1 SIN3A  
TGM2 EIF5A  
MLH1 NCF4  
EIF1B AIMP2  
APP CNTN4  
RAB3IL1 RAB3IP  
HMGA2PRMT1  
STAT5B PTPN11  
UBE2B UBR4  
CCDC85B RALYL  
SMC1A NEK6  
UNC119 TP53BP2  
TRAF2 C5ORF55  
CEP55 ECSIT  
VHL MCTS1  
APOB LRP2  
GFI1B ATXN2  
KIF1C YWHAB  
BCL2 TOMM20  
FLII OPTN  
CXCR2 ADRA1A  
AR ATF2  
SUMO2 LAS1L  
HR HDAC1  
MYO1DMAP3K1  
AP2B1 TUBGCP4  
ARFGEF2 ARFGEF1  
EFNB2 PTPN13  
DNALI1 ABCF3  
GH1 JUP  
PDZD2 PKP4  
POLR2B WWOX  
PARP1 ZNF423  
DNAJB1 DNAJC3  
TP53INP1 HIPK2  
SMAD4 NUA2  
ADRBK1 MDM2

YWHAG KRT35  
YWHAH NCOA1  
PPP1CAPLCL2  
TMED10 PSENN  
ITGAV AZGP1  
TARS IKBKE  
CDK2 PPP1CA  
FOXP2 FOXP1  
FATE1 RNF183  
HSP90AB1 YWHAB  
CHD4 UBASH3B  
MAPK1 NTRK3  
DHX9 MAP3K1  
RABEP1 RAB33B  
TNFRSF1B RCN2  
ITGB2 NDUFA2  
TP73 TP53  
CHRNA4 CHRNA3  
TBP ZNF76  
CYP27B1 NR2E3  
ULK1 ATG4B  
H2AFX CALR  
RAD52 SUMO1  
RAB27B SYTL1  
NCBP1 SRSF9  
GEMIN4 GAR1  
ERGIC1 ERGIC3  
JUP CDK5RAP3  
GRB10 ABI1  
ELANE SERPINB13  
MAPK3 MAP2K3  
HSPA4 PHLDA1  
CHD1L SUPT16H  
MYO10 SIRT1  
SLIT2 ROBO2  
GNB1 GNG13  
MAPK9 H3F3B  
PSMD2 NEK6  
SUMO1 C11ORF65  
ASCC2 MED31

JUP DSC2  
F2 PROC  
WBP4 SCAF4  
NCK1 SPEN  
TNFRSF17 TRAF2  
ASCC2 RNF11  
SOCS3 INSR  
RAE1 POLR3E  
UBE2I SNIP1  
HSP90AB1 CHORDC1  
GJB1 GJB2  
PSEN1 PSENEN  
GABARAPL2 KHSRP  
TP63 DAXX  
HSP90AB1 TBK1  
MLL E2F2  
NFKBIA MAP3K3  
MEN1 RPA3  
EPHB2 ARHGEF6  
SUMO2 SSRP1  
KDM1A POLR2B  
APBA2 USP20  
EPHB2 PICK1  
PSMA3 NFKB2  
ZNF397 ZSCAN30  
SLC38A1 CCDC148  
CCDC85B CARD9  
SDC3 TUBB  
UBE2B CRMP1  
NCK2 AXL  
MAP2K5 PARD6A  
RPS27A KCTD5  
UBXN8 GTF2F2  
YWHAG HECTD1  
ARRB2 PDE4D  
XRCC6 NAA15  
MET INPP5D  
CCNA1 ARID2  
TP53 CCAR1  
BRMS1L INGX

VAV2 BIRC6  
HINFP DPEP2  
SYK GAB2  
PAK4 YWHAZ  
PIAS1 SATB2  
INHBA CHRDL2  
PARP1 IKBKG  
STRN3 TRAF3IP3  
CDK9 EXOSC5  
COL9A1 COMP  
NFATC1 MAPK14  
BAD EWSR1  
MYH11 DAXX  
NCS1 PI4KB  
NASP LUC7L2  
FAT1 HOMER1  
RUNX3 SMAD2  
RUNX3 SMAD1  
KDM6AWDR5  
PFDN1 YEATS4  
NUP62 RANBP2  
GFI1B ZNRD1  
TROVE2 TRIM21  
MAGI3 VANGL2  
HSPA4 MAP3K3  
RAF1 INTS10  
AKT1 UXS1  
FBXW11 BTRC  
RPS16 ATG5  
NR3C1 HSP90AA1  
NFKBIA BARD1  
NUP62 NUP153  
H2AFX BRCA1  
SLC38A1 CCDC90B  
ZNF250 DPPA2  
SLC38A1 NIF3L1  
ZBTB8B TRIM41  
TK2 TP53  
HDAC1 CKLF  
NPR1 PSEN1



PARK2 TUBG1  
GYG2 GYS1  
PIK3CASH3KBP1  
TTC3 ATF7IP  
UCHL1 UBE2I  
CCNA2 CDC25C  
GHR STAT5A  
TCEA2 DCAF10  
RPA1 RPA3  
RPS27ABRE  
TRIP13 LOXL4  
HIST1H4I SUV420H2  
LRP1 USP3  
JUP DSG1  
UBE2H RNF166  
PGR MAPK1  
PIK3R2 CSF1R  
RASA1 KHDRBS1  
CLP1 TSEN34  
BECN1 NRBF2  
CD99 KPNB1  
F7 UIMC1  
CD72 SEMA4D  
RPS27ABTG4  
FBL PACSIN3  
HSP90AB1 NFKB2  
PRKACA PPP1R8  
FN1 FYN  
CCBP2 CCL27  
UBE2M CPNE4  
SMARCA4 MYOCD  
C1QA C1QBP  
PLD2 AMPH  
PPP1R15A MYC  
CDC25A YWHAB  
CALM2 MYO9B  
GSTP1 MAP3K5  
EMID1 AKTIP  
GPR135 MAGED1  
LYN BTK

CDK1 TSC1  
HSP90AA1 ST13  
PPM1D CDC5L  
TSC2 FBXW5  
ITIH1 PIK3CA  
HNRNPK RBM41  
OS9 ZNF512B  
COL2A1 ANXA5  
MAP3K3 PIH1D1  
TFEC MITF  
SMARCC2 INGX  
ST13 BAG1  
TP53 CDK2  
ARF6 MPP5  
CDK4 ACTR3B  
FAM107A PPP2R2A  
SOX9 SMAD2  
SRC YTHDC1  
CBL PTPRO  
ATF2 MAPK14  
EFNA5 LGALS12  
ABL1 NKX2-1  
IRS1 CBLB  
AP4E1 AP4S1  
CTNNB1 STK39  
VWF HSP90B1  
SRC ACTA1  
ZNF217 CTBP1  
SRC TAF15  
MYL6 IKBKE  
CYP27B1 CCND3  
PSME3 NUDT18  
CSNK1A1 FADD  
GOT2 EPB41  
ARL3 ARL2BP  
IMMT FUBP1  
UNC13B SPTBN2  
CYCS SAFB  
ARHGEF7 SHANK2  
CSN1S1 TTBK1

SH3KBP1 WNK1  
AIMP2 C19ORF57  
IRF1 IRF9  
GP1BA GP5  
MMP2 ACAN  
AKT1 PPP2CA  
SNCG MAPK1  
SLC6A3PICK1  
PTGES3FTSJ1  
CBLB GORASP2  
UBC MUL1  
ERN1 RPS27A  
VHL FZR1  
RAP1A RABAC1  
EGFR ESR1  
DRAP1 FEZ2  
CDKN2C QPCTL  
TP53 UBE2A  
PRKACA GJA5  
RET PDLIM7  
RAN SIN3A  
SRY EP300  
MTHFD1 TNIK  
SKIL TRIM62  
PRNP PPFIBP2  
BCAR3 PCBP1  
TCEA1 SF3B3  
ZNF217 EHMT2  
PDCD6 CPNE4  
PRPSAP1 PLEKHF2  
YWHAQ SLC8A1  
DAND5 HNF4A  
S100A1 PLB1  
GIPC1 PDXDC1  
LCK PRKCQ  
MCM2 HIST1H4I  
FOS RB1  
MAP4K2 MAP3K1  
PPARG SMAP2  
THBS1 TGM2

UBE2E1 NDUFB9  
CD2BP2 SNRPF  
APC THAP4  
MAPK14 JDP2  
CLU GRB2  
UBE2G1 UBE3A  
GPHB5 GPHA2  
SUV39H1 MYOD1  
REM1 CACNB2  
TAF1B THAP7  
RDX ROCK1  
TH1L COBRA1  
HLA-B PAICS  
CPNE1 PITPNM2  
SNCG TIMP2  
CUL1 SAP130  
FMR1 CYFIP1  
RPS27AABI2  
CCT8 RFWD2  
TP53 CUL9  
PHF3 WNK1  
NDUFA6 TBPL1  
HDAC1 CIR1  
TEC RAC1  
PFN1 XPO6  
EMD ACTG2  
ANXA6 S100A1  
TAL1 SSBP3  
YWHAZ SSH1  
BAI2 SHANK1  
NUP62 NUPL1  
DLG2 GLS2  
PRKCB RGS2  
FUS GSK3B  
ERCC2 TRIM25  
VCL PXN  
SERPINA1 DERL3  
E2F7 E2F8  
MAP2K2 KSR1  
RELA NFKB2

ABLIM1        BEGAIN  
ORC5   ORC6  
UBE2E1       TRIM39  
MATN2 FN1  
CMPK1 YWHAZ  
POLA1 POLA2  
PCNA   MYBBP1A  
MAPT   SLC1A2  
ZBTB43MCM10  
HLA-C   KIR2DS4  
PIN1    GPHN  
ADAM19       ABI2  
ATP5B YWHAG  
TSC22D1      PHB2  
EXOC2 SERGEF  
TJP3    FASLG  
VHL    TMC01  
TCF3    TCF12  
LRRC59       FTSJ1  
GATA2 ZBTB16  
SHC1    AXL  
CAPN2 PTPN1  
SOAT1   HLA-B  
CEBPB   NCOR2  
CSNK1A1      EIF2B5  
COL4A1       HABP2  
PIK3C3 CLPTM1L  
GADD45A      MAP3K4  
EGFR    HSPA4  
MET    SRC  
FXR2    ZBTB8B  
AGT    PRCP  
ACTN1   CAMK2A  
TRAF4   SMURF1  
DLGAP3        PLCG1  
NFKBIE        NFKB2  
CAV1    AKAP1  
GTF3C2POLR3C  
KDM1APHF21A  
HDAC2   ZNF461

NPM1 SUMO2  
CFTR SLC9A6  
RAC3 RWDD1  
CBX5 HDAC1  
PLCB2 MAPK14  
CCL2 CCL5  
CYCS PRKAB1  
PRPF6 MYC  
SUMO2 SUPT16H  
TAF1C RRN3  
DR1 NFYC  
HSPA5 CASP12  
BMPR1B UBE2Z  
BECN1 SEH1L  
MAPKAPK2 TSC2  
EMD SMARCB1  
HDAC4 SIRT1  
DAGLB PISD  
PSMC5 UBE3C  
RPS6KB1 MAPK3  
UPF1 DCP1A  
RANGAP1 CSNK2A1  
SRPX2 CTSB  
CPNE2 MYCBP  
C4ORF41 TECPR1  
JAK2 IKBKG  
TSC22D1 TOR1AIP2  
SNW1 HDAC2  
TRIP12 ATF7IP  
TALDO1 IKBKE  
SH2B2 BTK  
SMURF2 CUEDC1  
NPY1R LSM7  
ROCK1 DPYSL2  
MATN2 COL4A5  
PARK2 NDUFA4L2  
CLDN2 KRTAP4-12  
ITGB1 RAB25  
MAP4K4 RPLP2  
KDELRL1 COPB1

TPO DUOX1  
TCEB3B CEP70  
PLRG1 KPNA1  
AARS YWHAZ  
HSPA4 C8ORF41  
CTBP1 RBBP8  
RYS1 CAMK2G  
FBXO11 EFHD1  
YWHAE RPGR  
CPSF6 UBAC1  
HIF1A CREBBP  
NFKBIE CLTC  
CTNNA1 PPM1A  
SEMG1 TGM1  
IL8 CXCR2  
EPHB1 GRB2  
IL8 CXCR1  
POP4 RPP38  
POP4 RPP30  
DFFA NAP1L5  
PARP1 CARM1  
EHD4 STYXL1  
APP TGFB2  
PLK1 CLSPN  
GBF1 ARHGEF1  
SHC1 NTRK2  
RPS27A TAB2  
CD2 DAND5  
HGS VPS37A  
MID1 UBE2N  
MID1 UBE2K  
ITPR3 TRPC6  
MMP15 LRP1  
LNNA1 RABAC1  
MED26 MED15  
ACTR8 INO80  
ACTL6B SMARCA2  
CTNNA1 AHR  
VAV2 POGZ  
IFNAR2 GNB2L1

SMARCA2 NR4A2  
CHD3 CTTN  
CARM1 CREBBP  
UPF1 EXOSC4  
ACTN4 APC  
SRC KIFAP3  
DOK2 RAB10  
PSEN1 MTCH1  
MID1 UBE2D3  
RLN2 RXFP2  
NCKAP1 WASF2  
PPP1CCBCL2L1  
PLRG1 HNRNPM  
GNAO1 PDE6H  
CDH5 CSK  
SYK BLNK  
HGS VPS37C  
POLR2L NFKBIB  
LGALS3BP TAB2  
FPR1 ADRBK1  
BSG PAK1  
CD151 RNF128  
TP53 RAB4A  
XRCC5 SIRT6  
PDZK1IP1 COPS6  
SNRNP200 CIAO1  
CCAR1 TRIM63  
ERBB2 RIN2  
BECN1 SLC27A4  
LILRB4 INPP5D  
C3 C3AR1  
FTH1 MAX  
FXVD6 CCDC90B  
RPA1 RAD52  
DAXX FAM179B  
YWHAG ZNF295  
SRF NCOA6  
BRCA2 PALB2  
HIF1A HDAC2  
UBE2A ZMYM2



CASP3 PIP5K1A  
KCNIP4KCNIP2  
CST6 VHL  
MAP3K7 VRK2  
DPH3 SERGEF  
GXYLT1 FBXO11  
IKBKAP ELP2  
PEG10 ZNF512B  
GRIN2D PRKCB  
REN PCSK1  
IKBKG NCOA3  
IDO1 DDX24  
ERCC8 CUL4B  
YWHAG VANGL2  
MAPK3 IER3  
SERPINB2 RB1  
ADAM17 ERBB4  
CSK PAG1  
APOL6 PLEKHA5  
FRS3 RND1  
LCK MED28  
RPL7 TBK1  
HCK ERBB3  
PFKL MAP3K8  
XPO1 ARNT  
ERCC8 CUL4A  
BECN1 DZIP3  
RB1 UBTG  
APC DST  
RUNX1T1 ZNF652  
SHC1 HIF1A  
C3 CFHR5  
SAP30 HIST2H2BE  
GAPDHRAB2A  
NTRK1 PTPN1  
CSTF2 IMMT  
EIF4G2 NCBP1  
BCL2 PPP2R4  
ADAM12 EGF  
RPN2 CLN3

MSH2 RPS27A  
APC SPECC1L  
ERBB2 SUPT6H  
ITGB2 CYTH1  
HIST1H4I GATAD2A  
CDK5RAP2 STK36  
IL17A IL17RA  
DVL2 SORBS3  
YWHAH MED1  
SMAD3 SRY  
PTP4A3 STRAP  
CDKN2B KIAA1377  
BCAR3 GOT2  
SSX5 ZSCAN1  
MAPK8 SMAD3  
PRRX1 SOX10  
MED16 TRRAP  
BTF3 PINX1  
FHL3 FHL2  
KLHL12 MED28  
YWHAH NCOA3  
MAPK14 GDF15  
MYF5 ID3  
UBE2N ZNRF4  
G3BP1 CAPRIN1  
MEN1 RPA1  
INSR SORBS1  
ITPR3 ITPR1  
S100A9 TOPORS  
DHPS NUDT18  
PAPSS1 PPP1R16A  
TOB1 HNRNPH2  
HNRNPA1 ARID2  
TUBB4 NFKB2  
DDA1 SEPT9  
ERBB2 FER  
YWHAG DDX17  
TNFSF10 CUL3  
ALG2 PEF1  
TP53BP1 MDC1

DLG4 CNKSR2  
SPTBN2 KCNHR4  
PTPN1 NTRK3  
HLA-A LILRB1  
PSEN1 PRKCZ  
SMARCB1 SIN3A  
WIPF2 WWOX  
LCK SYK  
RNF166 UBE2E2  
GOSR1 PKP1  
LCK ZAP70  
OLFM2 EIF1  
EPB41L2 YWHAZ  
MAPK3 CCDC6  
ING1 TRRAP  
TUBB4 TBK1  
MAPK14 DUSP9  
NEFM SMAD2  
POU2F1NPAT  
TP53 ANXA3  
HSPA5 SREBF2  
BCAR3 IMPDH2  
LMO2 LDB1  
RAD52 UBE2I  
BCAP31 PLP2  
KIAA1267 CDC5L  
SF3B1 CDC5L  
CTPS IKBKE  
VCL NDEL1  
PKLR MYOC  
ESR1 CCNC  
EEF1D DGCR8  
CLTA CLTC  
POLR3D POLR3F  
SELL PODXL2  
APP DLG4  
ESRRB NCOA3  
SP100 CBX5  
RPL11 MAP3K14  
LMNB1 PLEC

HGS VPS37D  
PLCG1 PTK2  
SMAD9 AFF1  
UPF1 ACSS2  
CYCS GSTK1  
MFAP1 YWHAG  
CLDN8 TJP1  
RASA1 WWP1  
ID2 E2F4  
NCK2 SOS1  
DKK1 CORO1A  
KIF1A GIT1  
FHL2 SPHK1  
LMNA SMAD3  
YWHAB AKT1S1  
ABL1 GAD1  
ZNF417 KRTAP4-12  
IKBKE MAVS  
F9 GGCX  
SMARCA5 SIN3A  
CDK2 RPS16  
RAF1 PRKCE  
AP3D1 CTNNB1  
SUPT5H CCNT1  
EIF2AK2 ELF2  
ATP7B GLRX  
ATF7 PTP4A1  
PLD1 BIN1  
CFLAR TP53  
SMAD9 MAN1A2  
RAE1 MIOS  
NGFRAP1 PTPN13  
IFFO1 GF11B  
DNAJB1 TELO2  
CXADREWSR1  
MCM2 EMD  
RALA SMAD4  
APOH AKT1  
MIB1 SNX5  
GSN BCAR1

FOXO3 SMAD3  
AR DAXX  
UBE2F EIF2B4  
GRIN2D CLTC  
CS MDH2  
TP53 ZNF148  
LPA LRP2  
MCM5 MCM6  
PAK4 RAC1  
HDAC1 RUNX3  
ZBTB3 LEF1  
ST13 WNK1  
DVL3 LRRFIP2  
PAK4 FGFR2  
PFKM MCC  
TUBA4A RBBP5  
CCL5 CXCR3  
MAD2L1BP SETDB1  
NUDCD3 KLHL13  
DNAJB1 WIPI2  
PPM1G TRAF6  
HCK ASAP1  
ZNF408 ZNF331  
POU2F1 HNF1A  
LRP8 MAPK8IP1  
FN1 GSN  
TUBB RELA  
MAPK14 ATXN2L  
SNCA BAD  
LTBP2 FBLN5  
PRKCA ARHGEF1  
CD79B BLK  
NGFRAP1 TRAF2  
TP53 MYL9  
MLLT6 IKBKG  
DLX5 NCOA2  
MLANA ITCH  
CCDC85B C19ORF25  
IRS1 SIK2  
ASCC2 PIN4

HSP90AA1 COPS3  
HGS LDOC1  
CSTF2 DDX1  
RECQL5 RAD50  
CDKN2D TBC1D17  
CYP27B1 NCOA3  
CASR PI4K2B  
SLC25A37 TCF3  
SET TAF1B  
SFN TRIM32  
MED13L MED28  
TUBA1A MARK4  
SDCBP GRM3  
MAP3K10 PPP1R13B  
ABL1 PRKCD  
PHF16 ING4  
STAT2 HDAC1  
MLLT4 PICK1  
TIRAP TRAM1  
MBP MMP7  
MAPK3 NTRK3  
GNG11 SMURF1  
ATP6V1E1 ATP6V1H  
HLTF SHPRH  
SLC38A1 VASP  
YLPM1 USP7  
VPS37DTSG101  
DYNLL1 THAP8  
TBP DHX9  
PMS1 MCM6  
RELA REPS2  
ARRB1 SREBF2  
IDH1 SUMO4  
NR4A1 HDAC6  
CUTA VHL  
MED26 CDK19  
CAV1 STRN4  
EZH2 H2AFY2  
ITGA10 ITGB1  
PGR SMARCA1

PSMD7 KTN1  
SOCS5 IL4R  
ITPR1 RPS6KA2  
ESR2 NCOR2  
SIX1 EYA1  
MEF2A SMAD2  
BECN1 PTOV1  
NBN ATF2  
SIX1 EYA3  
MEF2C HDAC7  
USP10 GAR1  
RPS27A GGA3  
TBL1X CTBP1  
STX2 SNAP25  
RAF1 RASD2  
SLC2A1 SUMO1  
NEDD9 ELSPBP1  
PPM1B FOS  
AKT2 CDC37  
YWHAG HDAC9  
RHO ARR3  
DYNC1I1 DYNLL2  
RCOR3 NINL  
SMNDC1 ITSN1  
RPS6KA3 ZMYM5  
YWHAG ACIN1  
DNM2 MEPCE  
HOXA5 FOXO1  
LRSAM1 GPR108  
MDM4 ARF1P1  
EEF1A1 ZBTB16  
PCGF2 CBX8  
RPS27A WWOX  
MYC DCTN1  
VHL TBCA  
PDPK1 YWHAH  
PTN ALK  
STAT3 GADD45GIP1  
NFYA NFYB  
MAPRE1 MTUS2

DHX9 SRPK1  
TRIM27UBE2T  
RPA2 HNRNPUL1  
DMAP1 ING1  
TAPBP COPG  
BZRAP1 TSPO  
SMC1A ATG4C  
MYC GIGYF2  
SRC SMARCC1  
PRKACA PTPN13  
TOMM20 RNF144B  
STRN MCC  
CDKN2A SERTAD1  
DEGS1 PYGM  
RUVBL1 RIPK3  
TRIP13 WDYHV1  
CNOT2 CNOT1  
MCM7 CDT1  
INPPL1 MET  
UNC119 QTRT1  
GNAO1 RIC8A  
IGF1R SLC23A3  
VDAC1 HLA-B  
NRAS GRB14  
PSMB6 HLA-B  
HOXB1 PAX6  
SHB SLC39A1  
SDC3 CTTN  
CDK9 HNRNPU  
MLH1 RRBP1  
A2M HSPA5  
G3BP1 UTP18  
CBX7 PHC2  
CASP3 PRKCQ  
C18ORF10 EWSR1  
EMD MYO1E  
KDM1ACHD3  
ATP2B2DLG1  
PIAS1 RBBP6  
SRC COPS5



CCNA1 LRRC59  
GRB2 RBBP6  
PRNP ZNF740  
RIPK1 TAX1BP1  
RALA PLD1  
VPS18 UVRAG  
NRP1 PLXNA2  
MBP MKNK1  
ZNF512B KDM2A  
PPP1R11 PPP1CB  
GSN ARRB1  
HSPA4 CHTF18  
HNRNPA1 GTF2E2  
SRC MAP4K1  
MAPK1 PPP2CA  
HGS APC  
STAT2 SMARCC1  
NOTCH1 NUMBL  
SLC3A2PHB2  
TP53 USP11  
ASCC2 POLDIP2  
CTTNBP2NL FAM40B  
FANCA ATR  
DTNB TRAF2  
SNRPD2 LSM10  
PPP1R11 PPP1CA  
MEN1 CTNNB1  
GFI1B RAB11FIP4  
ATG12 DHX36  
RAF1 EEF1A1  
SNAP25VAMP8  
CLTC RELA  
EIF4E RPS27A  
GBAS LARS  
TP53RKTPRKB  
FXR2 ARL6IP1  
NDUFS7 ARRB2  
LYZ TRIP6  
MYST2 PLK1  
RZR1 CACNA1S

LYZ NFKBIB  
DAND5 BCL6  
RALA EXOC7  
ATAT1 CDK9  
IL18BP IL1F7  
APBB1 CYFIP1  
PLCG1 NTRK3  
FHL2 ZNF408  
BMPR1B RPS27A  
MYST3 MEAF6  
UBC PCNA  
CD247 PTPN22  
RGR KIAA1279  
DVL2 SNF8  
ADRA2B EIF2B1  
IKZF1 HDAC1  
PARD3B PARD6B  
SELENBP1 INSL6  
ACTB FLII  
MDM4 SMAD3  
VHL VAMP3  
GNAO1 NGB  
JAK2 GHR  
USP1 RPS27A  
PCGF2 PHC2  
LLGL1 GABARAPL1  
CBR1 VDAC1  
ZNF205 CALCOCO2  
RIPK1 CASP8  
FOS ZNF622  
MAD2L1 MAD2L2  
SRRM1 CDC5L  
TRIM32 PIAS3  
MYH7 PLEKHA5  
RPL23 RPL11  
SPRY2 GPRIN2  
MAST1 EXOSC1  
CLU PON1  
DOM3Z EXOSC7  
SMAD9 HBM

CASP7 PSME3  
PTPN12 TNK2  
IFNAR1 PIK3R1  
UBE2W RNF14  
YWHAQ KCNK9  
CTGF HSPG2  
PPP2R1B NFKB2  
ANK1 SPTAN1  
PTP4A3 MDN1  
ADSL USP4  
CCL2 VCAN  
PPARA MECR  
ITGA4 YWHAZ  
NUP98 AHCTF1  
KCNJ6 KCNJ9  
YWHAE YWHAZ  
EIF1B RPS9  
MAPK6 NIPBL  
TAGLN2 ATG5  
PPP3CBMLH1  
HSPA1B CDK9  
FER DNMI  
ITCH RPAP3  
SOAT1 HLA-C  
NFKB1 ELF3  
DLST ZHX1  
DLX2 DIP2A  
HNRNPA1 HSPA9  
SAP30 ING1  
RPL35AMAP3K1  
SETD1A ASH2L  
TP53 CCNA2  
ASAP2 THSD7A  
HCLS1 SSBP3  
KHK LYZ  
CXCR2 CXCL5  
GFI1B KIF17  
GEMIN4 PPP4R2  
SMNDC1 RNMTL1  
FLNB ITGB1

RHOA PLEKHG2  
PDE6D RHOA  
RAB8A RPH3A  
FANCA SMARCD3  
CD3E JAK3  
ITK ABI1  
CBX5 ORC2  
AVP AVPR2  
RB1 TAL1  
LSM3 XRN2  
PQBP1 ATXN1  
RPS6KA5 BAD  
TOB1 HNRNPK  
GTF2F2 AHR  
MAP1B PCBD1  
NUP160 AHCTF1  
COLEC11 SAFB  
CTNNB1 KDR  
CDK5 MAST1  
INSR PTPN1  
NFKB1 PRKDC  
SAP18 SEPT6  
CRMP1 CDK5RAP3  
TRIM27 EPC1  
CASP7 MAX  
PPFIA4 CAST  
ILF2 SF3A2  
MUC1 TNF  
SRC DLX4  
CCNE2 ORC3  
TP53 TBP  
STAT3 PTK2  
CHGB YLPM1  
HGS LYST  
GBAS ANKFY1  
PPM1B PPP2CA  
LNX1 NAGK  
UBASH3A ALK  
TRIM28 ZNF689  
ZCCHC11 TIFA

CDC25B YWHAE  
NFKBIE SFPQ  
GRAP2 ASAP1  
TSC22D1 TSC22D3  
ATXN1 IL34  
GTF2H3 GTF2H5  
GSK3B FOXO1  
RAF1 XIAP  
SET THAP7  
RAP2A RASIP1  
MNAT1 E2F1  
RB1 L3MBTL1  
MED14 NR3C1  
PPY PPYR1  
IL8 CCL5  
PRKCB CASR  
APOA1 APP  
HGS NMI  
CD44 SELE  
SUPT5H IK  
SETDB1 QTRT1  
SLC39A2 SLC39A1  
MCM2 RPS4X  
SLC7A9DNAJC14  
SNAP25SYT9  
C19ORF10 TRAF6  
OAT ARF6  
PRKCSH ARL4D  
UBE2D3 RNF165  
YWHAG TAF15  
PRPF40A SON  
SNCA SYK  
CLASP1 CLIP2  
C1ORF190 PLDN  
TIMP1 MMP1  
AHR NCOA1  
S100P MYH9  
MCC TMX1  
CD46 CD9  
TGFB3 ENG

NR5A2 ALB  
YWHAG CPSF3  
GABBR2 HTR1A  
PSMB10 PSMB3  
HDAC4 MEF2C  
AVP OXTR  
FYN EPHA4  
PLA2G4A CASP4  
ZNF496 NSD1  
TAP1 KRTAP4-12  
TRPC3 ORAI1  
RAD51 RAD54B  
CCR5 CCL13  
ITGB3BP UPF3B  
CDK2 SMAD3  
GRB2 GAD1  
CRADDINSL6  
RELA TNIP2  
GRIA4 CACNG2  
ZNF408 DDX56  
SFN MDM2  
UBE2H FHOD1  
FYN EPHB3  
XRCC6 PIN1  
CCDC85B C16ORF48  
RAD23A RNF32  
SMAD7 AKT1  
MMP7 CD151  
CENPA ZFP91  
GRIN2D ABL1  
TUBB MAP3K14  
ZNF263 TRIM41  
PHYHIP WDR89  
YWHAQ KLC3  
NUMB LNX2  
CCDC85B C20ORF195  
CTSG CAMP  
LSM11 LSM10  
SET TAF1A  
MYB PAX5

SET TAF1C  
EGFR HIST1H3J  
FCHSD2 HTRA1  
HSPD1 SUMO4  
CYP27B1 MED16  
SOX5 SMAD1  
NOL3 FADD  
OGT MAPT  
XPO1 ATF2  
MAPK13 MAPKAPK3  
ATP5L EPB41  
RGS5 GNAO1  
HIVEP1 SMAD3  
SORBS3 MAPK1  
ECHS1 FTSJ1  
YWHAG AKAP13  
KIF5B FYCO1  
CRK APOL5  
CYP27B1 THRAP3  
FASLG ITK  
PPP1R12B PRKG1  
TLX2 GTF2A1L  
GOLGA4 EXOC1  
RPS6KA5 NR3C1  
CSNK2A2 NAP1L4  
EMD DPPA4  
EEF1A1 PRKCD  
TNFAIP3 PPP2R1B  
CBFA2T2 RUNX1  
ZRANB2 RAC1  
CCNH CDK20  
CTSB S100A10  
SCNN1G NEDD4L  
GTPBP3 CIC  
NDC80 CCDC53  
MME SHC1  
PELO PTPLAD1  
PCMT1 TRAF6  
UBE2D3 RNF111  
METTL11A DIS3

SF3B3 SRRM2  
STRN3 FGFR1OP2  
APITD1 FANCF  
TGOLN2 PPP1R9A  
PXN PPP2R5C  
NRXN1 RPH3A  
PRKDC ILF3  
PRKDC ILF2  
PIN1 NEK6  
GNAI3 CD48  
N4BP3 USP20  
SP100 SNIP1  
INSL6 PSPC1  
CRK NEDD9  
CCDC85B TUBGCP4  
BRD4 RFC5  
SPRY2 ADAMTSL4  
CDC42 TNK2  
RFX1 HIVEP2  
LYAR TNIK  
CTSS CST5  
FOS COPS4  
FGA CDH5  
ST13 SMAD2  
CALM2 PLCB3  
KRT18 ALK  
C3 OLFM4  
AURKAUBE2L3  
VAV1 KHDRBS1  
SLC9A3MAST2  
SMARCE1 BAZ1B  
NRIP1 ESRRG  
SSSCA1DSPP  
FLOT1 FYN  
ATXN1 MTERFD2  
YARS GABARAPL2  
PIGK ULBP2  
COPS6 DDB2  
MYL2 USP6  
MED6 SREBF1



MAP3K3 PFDN4  
EIF3M TNIK  
SPERT TUBGCP4  
RB1 CEBPB  
HCK RPS27A  
ADRB2 ARRB2  
CCT2 SUMO4  
RXRG NR1H4  
RIPK2 MYO1D  
LYN CTLA4  
ZNF193 ZSCAN30  
PRKCB ACTN1  
CDKN2A MCM2  
KRT10 PRKCZ  
RNPS1 DDX23  
ANKHD1 DISC1  
GABARAPL2 VPS35  
ATG2A DNAJC7  
HSP90AA1 STUB1  
IL13RA1 TRAF3IP1  
PPIB HLA-B  
APP PITRM1  
PDIA4 TRAF6  
APC EPAS1  
DDB1 PRKAB1  
NADK NUDT18  
LSM3 EEF1A1  
APOB SEC61A2  
JAK1 PTPN11  
FGR YWHAQ  
SELENBP1 MED31  
MARS MAPK14  
MASP2 MASP1  
MAP2K2 ZNF385D  
ESR1 MED17  
DBT ADI1  
PGAP3 CSNK1G2  
STATH OVGP1  
ARMC6 STK36  
CYLD HDAC6

TUBB2C PSME1  
TRAF2 TNFRSF11A  
RARA SIAH1  
GTF2F1 MSX2  
NFKB1 NFKBIA  
ZW10 STX18  
CDK1 GORASP1  
USO1 GOLGA2  
LSM1 PSMB8  
UBE2C PCGF3  
PRNP SURF2  
HIST1H2BG LYAR  
TGFB1 SQSTM1  
FANCC SPTAN1  
DAXX MCRS1  
KEAP1 TSC22D4  
GMFG FBXL15  
PPP6R2 USP49  
AP3D1 AP3S2  
XRCC6 POU2F1  
MED1 MED30  
SYNCRIP GRB2  
LSM1 PSMB5  
GSTP1 FANCC  
MDC1 BARD1  
SAP30 RBBP7  
MTOR TRAF2  
UBC TRAF1  
DOK2 HSPA4L  
S1PR1 CAV1  
ZNF207 ERBB3  
VIM ACTA1  
ACACAILK  
UBE2W RNF138  
MPDZ PLEKHA1  
MCM7 HIST3H3  
KLHL12 PEF1  
DYNC1H1 TP53  
PRKCA SDC2  
C7ORF64 GLYAT

AP2B1 RIBC2  
YWHAE ERBB2IP  
CCDC85B UTP14A  
E2F1 DDB2  
LIMK1 CFL2  
CHD3 HSPH1  
SMAD9 CLPB  
PPFIA3 PTPRU  
MED26 CDK8  
USP14 PSMC5  
CTTN CTTNBP2  
ATF7 TAOK3  
PSAP VCP  
RAI14 RIPK3  
UBE2D2 LRSAM1  
TRIM5 BTBD2  
JAK2 PTPRC  
MPDZ PLEKHA2  
STXBP3 STX2  
PRPF4 PPIH  
USO1 GOSR1  
MYOG ID1  
MARK2MARK1  
TRIM28ZNF224  
LGALS12 NUMBL  
ALMS1 MEGF10  
PRKD1 PPP1R14A  
PSTPIP1 WASF1  
MYC NCAPG2  
HABP4 HMGXB4  
C7ORF26 AK5  
USP11 PRRC2B  
EPB41 TUBA4A  
MYC MAX  
GFI1B MYH14  
NR2C2 TAB1  
IL16 GRIN2C  
TRAF2 IKBKG  
APC CCT7  
ATG2A PHB2

MEGF6 EGFR  
GABPB2 MAGEB18  
SLC35A2 MDFI  
RAC1 ARHGAP1  
RPS20 MDM2  
PEX7 PHYH  
PNP NCALD  
TOP1 RRP1  
BRMS1L SIN3A  
CAPNS1 ARHGEF6  
SLC2A4SRFBP1  
KIT CD81  
VAV2 IPO4  
IL1B IL1R1  
TOP1 NCOA6  
EIF4G3 EIF4E  
JAK1 BTK  
NCK1 NKX2-1  
ACTC1 EPB49  
CRX MDFI  
NR1D1 NCOR2  
RB1 PSMC4  
YWHAG TTC28  
CMTM3BLNK  
FOS BTBD10  
LNX1 TRAF2  
EIF3A USP3  
BRCA1 RPS27A  
NUDT14 ARAF  
CCDC85B SCNM1  
SRC ARRB2  
ATF2 HIST2H2BE  
PRPF40A RLF  
DAND5 NR2F1  
SNCA KLK6  
CBS COL4A3BP  
MRPS34 USP42  
PLA2G4A RELA  
EXOSC8 XRN2  
GABARAP RASSF3

SUPT5H XRCC5  
TNFRSF14 NCLN  
PLG F2R  
KDR FRS2  
TNFRSF4 TRAF4  
FGFR3 RADIL  
FBP1 LNX1  
SMAD4 RHEBL1  
GCH1 RLF  
CDK1 PIN1  
BIN1 SOS1  
PIK3C3 NRBF2  
TAF9 C7ORF64  
VPS41 HOOK1  
PPP2CAHDAC5  
KRT18 COL17A1  
FDFT1 TMEM43  
PGK1 DDA1  
MPDU1 MORF4L2  
HIST1H1D LYAR  
MAPK12 DLG4  
PSMC5 TRAF6  
HGS EXOC8  
AKTIP MARCH5  
TGFA MAGI3  
KDR ATR  
MEF2C TWIST2  
PCP2 COL5A1  
PRKAG1 FNIP1  
SERPINE2 COL4A5  
TTN ANKRD2  
SF3B1 ARF6  
SF3A2 HNRNPUL1  
S100A4 PPFIBP1  
OGT CSNK2A1  
ZNF253 LDOC1  
EIF4E GEMIN5  
CASP1 CASP10  
TNFRSF1B GCN1L1  
PLCG1 FGFR4

RGS10 GNAI1  
GNB1 RASD1  
CLTC GGA1  
TGFBR1 SMAD4  
CLTC GGA2  
SLC38A1 INO80C  
HNRNPH3 PIM2  
HGS TSG101  
FYN SLC6A20  
PSMB5 USP14  
REST RCOR1  
USP45 CORO1C  
GABARAP ATG16L2  
TMPO AKAP8L  
UBE2N DTX1  
NCL GRB2  
EIF3B EIF3L  
HSPA1B SOX9  
CBL CD40  
CXADREWSR1  
GTF2E1PCBD2  
SMAD4 SNIP1  
UBXN1 USP32  
DDX3X TRAF1  
BMP6 ACVR2A  
PTPRA PRKCD  
SMARCE1 SIN3A  
PAK2 SORBS1  
PPP1R12A MPRIP  
COL6A1 FGF7  
UBE2N DZIP3  
THBS1 COL18A1  
CSNK2A2 CDC37  
CUL4A RNF7  
UBE2D3 MEX3B  
FXR2 PTS  
ATXN7L3 PICK1  
BCR CBL  
NCALD CLTC  
SERPINB4 USF2

KIF4A BRCA2  
NR3C1 PPP3CA  
VCP STX5  
DDX58 TRIM25  
MAGOH UPF3B  
AR NCOA6  
CSNK2A2 MAPK14  
CREB1 FHL3  
CSN2 CSN3  
ESR1 FOXO4  
GPRIN1INA  
FGFR1 FGF9  
SUMO4 TUBA1C  
NCK1 CKAP5  
FBXW4 ECSIT  
PPIH SART3  
CUL4B GRWD1  
SH3D19SH3GL1  
SH3D19SH3GL3  
YWHAG AKT1S1  
PTPN1 GRB2  
TUBB DPYSL2  
DFFA YWHAG  
USP36 UTP18  
CCDC136 UBQLN4  
ANXA11 ALG2  
BAG2 TNFRSF1B  
A2M KLK13  
ETS1 SCOC  
TERT AKT1  
CREB1 DYRK1A  
UBE2L3 MKRN3  
PGRMC1 VHL  
NRIP1 PPARD  
SLC11A2 RPS27A  
ERBB2 ERBB4  
EDN1 EDNRA  
EIF3E MAGED1  
TNFRSF8 TRAF2  
BRCA1 E2F4

VHL CSTF3  
BBS9 TTC8  
FANCA AKT1  
PSMD8 TRAF6  
GNAI2 TUBA4A  
STAT3 IL1RAP  
MLF1 MLF1IP  
MYC CEP57  
ZNF646 TRAF2  
ETS1 NFKB1  
FYN PTPN4  
RBFOX2 GLIS2  
ITGB1 CANX  
MEF2C EPAS1  
CBL UBE2G2  
GSTO1 UBA5  
MYC HEATR2  
HCLS1 TRIM29  
SLC25A37 TCF4  
TMSB4Y EWSR1  
CDC42 ARHGAP1  
SUV39H1 SMAD5  
EP300 RBM14  
ZBED1 SORBS3  
FYN WNK2  
OGT NUP62CL  
PHYHIP MED8  
SRSF4 SMURF1  
STAMPB CLTA  
SF3A2 DDX23  
LYAR ANAPC2  
DVL1 CCDC88C  
IMMT NDUFB9  
RELB EHMT2  
RPA3 RAD51  
MX1 TRPC5  
SMAD4 FBXO30  
HGS CRMP1  
EP300 TRERF1  
KDR GRB2



ATP2B4DLG1  
NIF3L1 TRAF2  
SSTR5 ADCY10  
USP39 SNRNP40  
SHBG C9ORF24  
ARF6 RCC2  
RFXANK PTC3  
COG3 COG4  
TRAF2 TAB1  
PIM2 IKBKG  
CYP27B1 LGALS12  
MLH1 MUC2  
BAAT SLC7A8  
TP53 MYST1  
PTP4A3 HEATR3  
HP C1RL  
FYN HCN4  
NCOR1 COLEC11  
KAT2A IRF7  
USP7 TCEAL4  
ADRBK1 MC4R  
PIAS4 ZNF512B  
AP2A1 DNM2  
HTT CASP6  
HSP90AB1 STUB1  
TPH1 YWHAZ  
PNN NFKBIL1  
PCBD1 TIMELESS  
MAPK1 MKNK2  
RANBP2 IFT140  
CNTFR CLCF1  
UTP14A TINAGL1  
FGF17 FGFR4  
ATXN2L G3BP2  
DTNB PRTFDC1  
SYT1 CACNB3  
TPM2 EPB41  
SGK1 EZR  
SMARCA2 NR0B2  
RPLP2 PAX8

PRPF4 SART3  
PSMB5 TRAF6  
TGOLN2 NCK1  
PDIA4 PRKAB1  
PPM1A ARRB1  
CCNK EFEMP2  
ROCK2 STK16  
SQSTM1 ABHD10  
PIK3C2A EIF3A  
CPE NTS  
PLCG1 IL3RA  
XRCC5 APLF  
USP11 TCEAL4  
HPS6 HPS5  
GPS1 SKP2  
RPS6KB1 PRKCZ  
GNAI2 HSP90AB1  
SHC1 STAT5B  
F10 TFPI  
CD48 BRIX1  
AXIN1 SENP2  
MDC1 CREBBP  
CRK PRX  
PPP1CAPHACTR4  
CANX SSR1  
RHOC VHL  
PARD3 JAM3  
PDS5A SRRM1  
PRF1 CALR  
COIL TFCP2  
FGF1 FGFR4  
UBE2D2 TOPORS  
BCL3 RAB9A  
IPO5 NUP153  
EZR PHLPP2  
NR1D1 NR2E3  
STX11 SLC38A2  
XPOT AIRE  
CSK PXN  
KLHL24 COPS5

TP53 E2F1  
GATA2 PML  
SOX2 ALX4  
IPO5 RANBP2  
ARPC4 CTTN  
GHR CRK  
MAP2K1 EP300  
GOT2 PRKAB1  
DHX30 NR2E3  
YWHAG TJP2  
TCF4 ID4  
ADRBK1 NCS1  
FCAR PPP2CA  
RPL22 IKBKE  
FKBP8 MAPK14  
PBX1 PKNOX1  
ATF1 HNF1B  
HTT REST  
PSMD14 PSMD6  
APC RPL5  
XPO1 TP53  
TAF1B RRN3  
LRP2 AIDA  
POLR1A POLR1B  
MAP3K7 NFKB1  
CTNNB1 TMPO  
RBBP9 RBL2  
GIPC1 BCR  
XRCC6 XRCC4  
PSKH1 CDC6  
XRCC6 SNTA1  
VIM TNFRSF14  
YY1 ARRB1  
IPO5 SUMO2  
PFN2 HTT  
ITGA4 ADAM28  
UBE2N RNF182  
NFKBIE HSPA5  
CEACAM1 CEACAM8  
PPP2CBPACS1

VLDLR SNX17  
RAB5C ZFYVE20  
PCP2 YLPM1  
SOS2 SH3D19  
UPF1 PLEKHB2  
CCT5 GPN1  
FABP3 PLK1  
NF2 PXN  
CUL1 CDCA3  
XRCC5 SUMO2  
EFEMP2 LOX  
ATF1 CSNK2B  
ZBTB7A HDAC2  
PLAT LRP1B  
NFYA MT1H  
EIF3E TRAF6  
ITGAL VHL  
LCK ITK  
PYGB MLH1  
AP3B1 BUB1  
PSMB1 PSMB3  
PSMB1 PSMB2  
ERBB3 RNF41  
GABARAPL2 FNBP1  
PIAS1 NR2F2  
MED18 MED31  
MYH10 PAK2  
CLTC MAP3K3  
MEN1 MLLT4  
HSPA1B PEX5  
MUM1 MYD88  
FYN APOL5  
GEMIN7 STRAP  
NOL3 SRSF9  
ETV6 IRF8  
VAV1 SUZ12  
E2F1 TOPBP1  
PRPF4 MEPCE  
VIM RAB8B  
NDC80 TOM1L1

F2RL2 CDH5  
GNGT2 GNB4  
ABL1 COBRA1  
ZNF675 TRAF6  
EML3 NEK6  
PTGS1 NUCB1  
EPB41 PAFAH1B2  
RPL7 NFKB2  
ARFIP1 ARF1P1  
L1TD1 ZNF512B  
ALAS2 SUCLA2  
CACNA1C CABP1  
ESR1 MYOD1  
AXIN1 MAP3K4  
OPRD1 ARRB1  
CUL4A COPS7A  
TPD52 IKBKE  
BRAF PAK2  
DET1 RFWD2  
PDGFA HIST1H2BJ  
MYC DNMT3A  
ACVRL1 TGFBRAP1  
APOA1 APOA1BP  
MYC TAF6L  
RELB DPF2  
NEB STYXL1  
MYC MXI1  
IKBKB MAP3K13  
DERL2 AMFR  
CCND3 CDKN1A  
DAND5 POU2F1  
YWHAG LRMP  
ACSL4 YWHAZ  
ABCA1 ARHGEF12  
RAE1 POLR3B  
PPIP5K2 SUMO1  
UBE2M RBX1  
FOXH1 NKX2-5  
MYC DNM2  
PRKCH DNAJB1

PAFAH1B3 UBE2O  
ANP32A HIST1H3J  
PLA2G4A MKNK1  
ILK NOC2L  
EXT1 EXT2  
GAL GALR1  
USP7 CHFR  
MEOX2 KRTAP4-12  
DDB1 TRAF6  
KCNH4 FLI1  
USF2 PPRC1  
CHD3 HDAC1  
NR3C1 PSMC3IP  
QPCTL PRKAB1  
HIST2H2BE TAF1B  
USP1 USP4  
ATXN1L NCOR2  
ABL1 PTPN18  
HSPA1B ST13  
RARA RPS27A  
MSTN FSTL3  
SNRPB DDX20  
PSMC3 NDRG1  
DLL1 MFNG  
PAPOLA HDAC1  
MPDU1 QRICH2  
PRMT5 SNRPB  
PPARG ZBTB3  
PHLPP1 DMWD  
SAFB2 SRPK1  
MET CDH1  
DMPK CELF1  
ABL1 PTPN4  
TGFB3 VASN  
NR3C1 SUMO1  
DPCD RUVBL1  
C1QBP TRADD  
MID2 UBE2D4  
IL2RG SHB  
GYS1 GABARAPL2

PSME3 SMURF1  
TRIM24RXRA  
TP53 RNF20  
RAB11A MYO5B  
RASA1 GRB2  
SRC DNMI  
PSG4 INSL6  
MYC IKBKG  
TTF1 SMAD1  
PIAS4 HDAC2  
HSP90AA1 STK11  
UBE2H TRIM17  
DAXX GTF3C3  
VCL SORBS1  
NKX2-5CSNK2A1  
CEP55 AKAP9  
STXBP3 GEMIN5  
RPS14 RBBP6  
IRAK1 TIFA  
DAZL PUM2  
PLXNB2 PLCG1  
UBE2D1 RNF25  
ACTN2 TSC2  
USP11 OTUD5  
LYAR IGF2BP1  
COPS6 PHYHIP  
UBE2N RNF130  
IGHG1 FCGR2B  
TUBB GNB2L1  
SPTB ADD1  
S100A8 IGSF21  
RARG ZNF423  
ZFP106 WNK1  
SELENBP1 USP15  
SYNJ1 PACSIN1  
PLCG1 HSPG2  
CD8A SREK1  
TOP3B CHD8  
UBE2D1 BIRC2  
CSTF2 SYMPK

TPD52L2 YWHAG  
IRAK1 NUP98  
TUBB REL  
VAV2 RBBP6  
PAK4 ITGAV  
FURIN PMCH  
NCK1 AFF2  
UBE2U RNF125  
CRYBB3 GRB2  
POMT2 POMT1  
TLR2 CXCR4  
SFN HNRNPU  
KCNK1 UBE21  
CSDA TJP1  
PLCG1 ZP2  
SSSCA1DOK2  
CCNT1 NCOA2  
UBE2H RNF114  
LAMC1 CCDC53  
EYA2 SIX4  
EZR CD44  
VWF PDIA4  
GJA1 TFCP2  
SMAD9 SIL1  
CCDC136 DISC1  
PLEKHF2 RTN4  
UBE2D1 BIRC3  
SRSF4 SMURF2  
SORBS2 CBL  
INPP5K NCOR2  
LUC7L2 IKBKG  
KIT STAT5A  
RPLP2 IKBKG  
SAP30 HIST3H3  
PTPN6 TRAF6  
KIT STAT1  
CIAO1 FAM96B  
TCERG1 HSPA4  
FOXS1 RBPMS  
HIST1H3J WWC1



BTK MED28  
CDH1 GNA13  
F10 F7  
STAMBP CHMP5  
PAK4 GATAD2A  
USP7 DNAJA3  
GRN HSPG2  
CYP27B1 TRRAP  
CDKL1 SMURF1  
GLUD1 MAP3K1  
CDKN1B CCND3  
ASGR1 NLK  
GNAI3 RIPK3  
APC RTN4IP1  
PPARG RBBP5  
NUP153 SMAD2  
GABARAPL2 SQSTM1  
PTN PMF1  
EGFR CYTH2  
ABCA1 MPP6  
RNF2 MBD1  
MAP2 ACTB  
PSMB3 UCHL5  
USP45 RALY  
CDK14 ACVR1  
GNAO1 CRHR1  
PCBD1 KIF5A  
APC AKAP9  
SFN C1ORF106  
NCOR1 BCL6  
PRKACA MC4R  
NCK1 CYFIP2  
AGTR1 GPRASP1  
MYC RELA  
PLCG2 PTPN11  
DES SYNC  
HNRNPL HNRNPA2B1  
CDK1 PTCH1  
HIST1H4I HIST3H3  
SHC1 FLT4

FYN MAP4K5  
PPFIA1 ING4  
ENOX2 ENOX1  
RPL37APINX1  
SYT1 SV2B  
VBP1 PFDN2  
HIP1 ITGB3BP  
CDK9 STK36  
GRAP2 PRPH2  
PTPRM CTNNB1  
ERBB2 PTPRK  
FBXL12MAST1  
MCM4 CCNA1  
PROX1 CREBBP  
MARK3FANCF  
HNRNPL FGFR3  
ERCC2 ERCC3  
APOE GCDH  
TOM1L1 CCDC47  
SUV39H1 HDAC5  
VWF ITGAV  
CUL2 KEAP1  
FYN TRAIIP  
YWHAG MAGOHB  
EPM2A UBE2D1  
PLA2G4A UBXN1  
PARK2 CASP8  
MYH9 MYOM1  
PDLIM4 TRIP6  
CSNK2A2 HDAC2  
ST8SIA3 NCAM1  
MYC GTF3C3  
EEF1A1LAMA4  
ITPK1 COPS8  
KRT18 PKP2  
GZMB SERPINB9  
CCR2 CCL13  
CCKBR PPP1R9B  
MPDU1 PMVK  
TUSC2 HSPA4L

PPM1B GSN  
SGK1 CBR3  
CCT8 PPP2CB  
FTH1 MEF2C  
SAP30 ARID4A  
FTSJ1 RUVBL1  
PLCG1 PALM2  
MAPT PPP2CB  
SMARCA2 SS18  
NEFM RAC3  
CXCR3 CCL13  
POLR2C POLR2B  
RPS27AMDC1  
FNBP1 MAP1LC3C  
FGFR1 EPHA4  
PSIP1 MLL  
GNAZ DRD5  
PPIB FTSJ1  
MYCBP2 MYC  
HNRNPC PIN1  
RNF166 UBE2W  
UBE2N MIB1  
EZR YWHAZ  
TNFRSF1B GBF1  
S100A1 MDM2  
CASP1 NLRP1  
ARF1P1 PLEKHA8  
TSPAN12 FZD4  
FTSJ1 DRG1  
PRRC2A GANAB  
CSNK2A2 CREBBP  
TNNC1 TRIM63  
PSMC5 UCHL5  
PPP2CARELA  
GPC4 FGF2  
CLN3 INSL6  
PSMC2 PSMD6  
RBPMS EWSR1  
PRDX2 EXOC6  
MYC COPG

H2AFX PTC3  
CCNT1 TAF7  
AKAP5 IQGAP1  
PRPF4 PRPF3  
DCAF6 SMURF2  
ZYX RPH3AL  
CCNO VAV2  
AR CASP8  
RUNX1 AES  
PMS1 MMS19  
HSPA1B RAD23A  
SCRIB TJP2  
FLNB MLH1  
PKD2 PACS1  
GRIN2D TJP1  
FADD IKBKG  
MYST2 ZNF165  
ARRB1 NOLC1  
GABARAP VPS28  
PSMD8 UCHL5  
TTI1 ATR  
SOCS1 PIK3R1  
KCNQ2 CALM2  
HMOX2HAP1  
BRD4 RFC3  
GAS7 WASF2  
PIN1 CAPRIN1  
GAPDH PRKCI  
U2AF2 MAP1B  
PLXNB1 RND2  
SNAPC5 DEPDC1B  
GABPB2 YAF2  
GATA1 SMARCC1  
MED22 MED17  
CCT5 IGBP1  
TRIM37UBE2U  
CANX SLC6A4  
GRK4 IKBKG  
CFL1 SSH2  
DMWD TRMT2A

LIN7A DLG1  
HOOK2 AKTIP  
PLCG2 BTK  
PSMD12 USP14  
PPP1R12A PRKG1  
KIF3B KIFAP3  
PDE4DIP ZNF512B  
SKIV2L2 YWHAG  
EPB41 CDK2  
WDR33 GIT1  
PARN UPF1  
SOCS1 AXL  
NCOA2 SRCAP  
UBE2E1 RNF181  
RDBP COBRA1  
TXN VHL  
SUMO3 POLD3  
FRA10AC1 ADPRHL2  
RAB27A SYTL3  
PPP2R1B STRN3  
SIN3B RNF220  
PPP1CBAKAP11  
THRA YWHAQ  
PGC CDK9  
FYN CD55  
FLNA CAMKK2  
POLRMT NFKBIA  
TRIP6 GFI1B  
RRP12 AP2M1  
EPS8 CCDC85B  
FAM40A CTTNBP2  
GNAI1 NGB  
DDB1 VPRBP  
EIF3D HLA-B  
PRPF4 PFDN5  
MED14 NCK1  
MTOR UBQLN1  
CUL1 COPS8  
DAND5 ETS1  
CD63 CD81

SMARCB1 MCPH1  
HSPB1 CRYGC  
CCT8 IGBP1  
NUP214NXF3  
WASL PACSIN1  
DDX5 SRA1  
PGRMC2 IKBKE  
PPP6R2 ATXN1  
CCNB2 TGFBR2  
ARRB1 SLC9A5  
MX1 DAXX  
FRS3 PTPN11  
GMFB IKBKE  
CDC42EP2 SEPT7  
APC SYNE2  
BICD2 NEK9  
SLC9A3R1 SCN4A  
KRT79 BTRC  
MED24 SREBF1  
GRIN2C DLG3  
CAPN1 SH3BGR  
DAZAP2 SMURF2  
USP49 YARS2  
CBX7 RNF2  
GIPC1 TPBG  
NR5A2 NR0B2  
C4ORF14 WDR18  
ORC5 CDKN2A  
HOXC13 HNRNPAB  
TBL3 RBBP7  
WFS1 ITGB3BP  
PIAS1 PTK2  
TK2 SETDB1  
DNMT1 DAXX  
MLL CTBP1  
CUL1 C20ORF94  
PGR STAT5A  
UBE2G2 RFFL  
RNASE4 TNFSF8  
PARN KHSRP

TBPL1 GTF2B  
EIF3F CSNK2A1  
NCK1 DTNBP1  
SOD1 STUB1  
GIPC1 SLC2A1  
FOXO1 CSNK1G1  
MAPK1 PTPRH  
UBE2D1 RNF125  
NCOA7 ESR2  
DAPK3 RPS27A  
NCK2 EFN2  
PRKCG PTPN1  
PPIH USP15  
TADA3 USP22  
SMC2 DNMT3B  
SEPHS1 TNFRSF10D  
MCM7 DBF4  
VHL KNTC1  
KRT18 SHC1  
REN RENBP  
CHD3 HDAC2  
FLAD1 PRTFDC1  
GNAI3 MAP3K3  
ARSA GAL3ST1  
NR3C1 CWC15  
PIAS1 TBP  
HSPA4 YWHAZ  
TLE1 SIX1  
MEF2A EP300  
SH2B2 LYN  
HGS APP  
HNRNPM C20ORF24  
SH2B2 ASB6  
SNW1 SIN3A  
ARF1P1 C4ORF14  
NR2F1 CBX5  
NONO CRT2  
TUBB MAP3K3  
CTNNB1 EMD  
PRKCI SMG1

MLL CREBBP  
MLL MYST3  
EIF3J EIF3K  
CHD3 IKZF1  
PPM1A CACNA1B  
RPS6KB1 POLDIP3  
CHD3 XRCC4  
GNAI1 RIC8A  
PSMB1 CASP4  
TADA2B USP22  
SREBF2PTGES3  
KRT85 USP15  
CEP110 TFIP11  
MYH8 PHB2  
MED1 MED8  
JAK2 PPP2R4  
FLNA TNIP2  
RAB4A DYNLL1  
MED26 MED18  
PIK3R1 TULP4  
UBE2D1 CHFR  
AR APPBP2  
CSNK2B TRIB3  
HSP90AB1 FLNA  
SEMG1 KLK3  
PPP1R8 HDAC2  
LTA TUBA4A  
BTF3 HLA-B  
YWHAG FGD6  
EZR SELP  
AXIN1 DAB2  
IPO5 RPL13  
ACVR1 SMAD1  
NBN FANCD2  
ANTXR2 COL4A3  
FGF1 HSPA9  
MYC USP48  
ORC1 MCM6  
CSNK1A1 RIPK1  
PDE6D CDC42



COIL FXR2  
PFN2 TERF1  
CCDC85B BEX2  
SMARCB1 ARID1B  
NCOR1 ZBTB6  
DCN DPT  
SF3B2 RBM7  
FAM175B USP7  
YWHAG LIMA1  
UBE2N CADPS2  
YES1 CDKN1B  
HOXD4 HNRNPAB  
RAE1 USP7  
DIMIT1L USP42  
SCAMP1 SYNRG  
PRPF40A VCL  
HGS ATP1A1  
ZBTB16SIN3A  
YWHAE ING1  
LRP1 DHCR24  
SMARCE1 RCOR1  
NOS1AP RASD1  
SEC13 NUP85  
JUP NFKBIE  
PSMB3 PRKAB1  
RPF1 GABARAPL2  
KCNA4 ERBB2IP  
BECN1 EXOC4  
DDB1 GPN1  
ABL1 RAD9A  
COMMD1 NFKB2  
KDM6AASH2L  
IL29 IL28RA  
PXN LIMK1  
CFTR BCAP31  
CD44 ERBB4  
MAP3K8 MAP2K1  
CDK5R1 TSC22D4  
GTF2I BTK  
MAP3K1 BAG5

HNRNPL TRAF6  
WIPF1 WBP4  
CBX4 USP11  
PPP2R1B SET  
TUBB1 RASSF1  
CNOT6L CNOT1  
SRC AHR  
NFKB2 NFKBIB  
HIST1H4I HDAC6  
TH SNCA  
EEF1A2MAP3K1  
HUS1 PCNA  
RNPS1 DDX20  
GATA1 CREBBP  
ZNF408 THAP1  
POLR2C MED19  
LMNA SUMO4  
GRIA2 DLG4  
PRKACA CCND1  
IKBKB C1QBP  
DYNLL1 ZHX1  
MAP3K8 EPPK1  
GATAD2B DPEP2  
CCR3 CCL7  
SLX4 C20ORF11  
TRAF2 TRAF6  
UBE2C ENO2  
TRAF2 MAP4K5  
MPHOSPH10 IMP3  
CRMP1 CCDC106  
CDK9 CCDC87  
RPL22 CDC42  
HCLS1 MAP4K1  
HSF1 PTGES3  
GTF2F1 HNRNPU  
RNF4 IKBKG  
NANOS3 CALM2  
NR3C1 UBE2I  
CTSD IGFBP3  
NR3C1 MAPK1

HABP4 DAXX  
LYN FASLG  
P4HB PTN  
LAMP1 NCSTN  
E2F1 SERTAD2  
SLC9A3R1 MSN  
PARD3 PARD6G  
TLE4 PAX5  
PARD3 PARD6B  
NR2C2 TRAF2  
PRKCI PARD6G  
PRKCI PARD6B  
PTN CRCT1  
KHDRBS1 YTHDC1  
TNFSF10 C7ORF64  
STXBP1 DOC2A  
PLEK INPP5A  
EEF1A1 TAF9  
TAF10 SAP130  
CSNK2A2 ARRB2  
CCR3 CCL8  
EPB41 ACTA1  
ESR1 AKT2  
TFRC IKBKE  
SNAPC5 SNAPC4  
BRAF CCDC88A  
MAP3K7 EIF2AK2  
FAM127A UBQLN1  
RAF1 LTK  
SHC1 KDR  
SUSD1 ATF7IP  
NAA38 ITSN2  
CBX1 CDYL  
WIZ EHMT2  
STK39 SLC12A6  
NRP1 FGF2  
ESR1 AKT1  
RPF1 SH3KBP1  
SKIV2L2 MPP6  
PDE4B DISC1

CD55 NDUFA2  
APBB1 DDX46  
PRKCA RRAD  
IRF1 RPS27A  
N4BP3 RPF1  
NUDT21 VHL  
PIK3CA APLP2  
ATN1 STXBP4  
POLR2E RPF1  
HMG20B RCOR1  
SLC26A8 RACGAP1  
EPN2 YWHAG  
SDC3 SDC2  
CDK2 CNKSR2  
E2F1 FHL2  
COPB1 COPA  
PTP4A2 CNNM3  
STXBP1 APBA1  
IRF1 RPS27A  
HBP1 HDAC1  
USP11 RING1  
SMARCB1 MLL3  
ACTN1 MAGEA11  
FADD RYBP  
HSPA1B SNRK  
YWHAQ SRSF6  
G3BP1 FLNB  
MED22 MED29  
MMS19 PHB2  
E2F1 TFDP2  
TAF1 TAF7L  
E2F1 TFDP1  
PDGFA PDAP1  
KEAP1 COPG  
UBE2G2 USP15  
HSPA5 DNAJC10  
IARS TANK  
MYC TNPO3  
RNF144A UBE2V2  
PMAIP1 BCL2L2

GABARAPL2 CUL3  
FOXG1 FOXO1  
ACVR2A GDF5  
PXN PAK1  
PAK2 MKNK1  
UBTF MAPK1  
CLDN2 WNK4  
DNAJB6 USP8  
STAT3 SUMO4  
PSMB5 POMP  
SNRPB C14ORF1  
PEBP1 HLA-B  
CCL20 RALBP1  
RXRB GTF2H1  
MTA2 BCL11A  
UQCRC2 ARF6  
MPP3 CADM1  
CRYAB CASP3  
ATF7IP KIF13A  
FGF17 FGFR3  
DYNC1H1 IKBKG  
MAP2K4 RBM17  
FOS SMARCD1  
TRIM9 EXOC1  
PHC1 RNF2  
ZSCAN1 ASH2L  
EZR SPN  
MYC CARM1  
SUB1 EP300  
CIAO1 GTF3C5  
CIAO1 GTF3C3  
RBBP7 BCL11B  
RNPS1 RBM42  
PLCG1 HNRNPA2B1  
MED22 MED9  
CCDC85B TSPYL4  
LRP2 LDLRAP1  
CCND1 PPP1CC  
DPCD RUVBL2  
DVL2 RHOA

PSMB3 TRAF6  
EIF3E PRKAB1  
RFC4 CHTF18  
TYROBP SYK  
IRAK1 SIGIRR  
TRIP13 LNX1  
TYROBP ZAP70  
SYNJ2BP RALBP1  
IFIT3 MAST1  
INSL6 WWC1  
MYST2 CBX8  
OLIG3 TCF12  
CNR1 GNAI1  
BCAR1 ARHGAP32  
GMCL1 TSG101  
EPRS NFKBIB  
G3BP1 GIGYF2  
PLG LAMA1  
HGS APLP2  
PABPC1 GNB2L1  
DTNBP1 ZFYVE20  
ZFYVE9 UBXN11  
MOAP1 MAGEH1  
BNIP3L LMNA  
UBE2I TP53BP1  
MED26 MED10  
FGF1 FGFR3  
CDKN2A RPL11  
DYNLL1 C14ORF1  
LHX1 ISL1  
CDH9 CDH10  
PTPN11 LY9  
TAPBP PDIA3  
RAD23B PSMD4  
MMP14 LUM  
MYC LAS1L  
MCM7 ORC3  
SPP1 IGFBP5  
PTPN1 RHOB  
POLA1 POLE

ICMT RHOA  
CIAO1 WT1  
CDK1 KAT5  
PTPN12 IFT20  
CASP2 BCL2L1  
UBE2I CHD3  
GNAI2 IGF1R  
GOLGA2 RUSC2  
UMPS DLST  
IGF1R EEA1  
ATXN7L3 ENY2  
PRPF4 SART1  
EFEMP2 HHEX  
UBE2H MRPL38  
HDAC3 IL16  
NCK2 NCKIPSD  
TP73 TRMT11  
TP53 XRCC6  
SELENBP1 TRIP13  
RHOD TGFBR1  
ESR1 DNTTIP2  
INSL6 PRMT1  
ETS1 ACAD8  
PIM1 BAD  
CDK19 MED19  
YWHAG BAIAP2L1  
NUMA1RPAP1  
KDR GRB10  
SMARCA5 CENPA  
ABL2 ERBB4  
MYH9 TRPM6  
ZNF24 LPHN3  
EEF1A1 ANKRD24  
GCAT TDH  
CSK HNRNPK  
TRAF2 RIPK3  
FYN DAB2  
SNIP1 HIPK3  
DCP1B UPF2  
SERPINA5 KLK2

CXCR4 ITCH  
USP13 FAM115A  
POLA1 SMC1A  
CREBBP KLF13  
CKM FHL2  
NFYA TAF11  
TP53 PTK2  
UBXN11 C6ORF165  
DVL1 ARHGEF19  
EIF4E MKNK2  
FLNC MYOZ3  
ABCA1 AOX1  
TPM3 S100A4  
HIST3H3 HDAC8  
TSR1 MAP3K14  
ME2 ATIC  
CCT6A IGBP1  
EYA2 GNAI2  
APC DBF4B  
YWHAB MINK1  
PURA E2F1  
TRAF2 EDARADD  
RAF1 PDGFRB  
PLCG1 CBL  
ITGB1 SPP1  
MYBPC1 FHL1  
CTNNB1 MLL  
PIK3R1 KHDRBS1  
PARK2 EPS15  
PSPH CIRBP  
FGR HCLS1  
PPL SKIL  
RPS27ANEDD9  
GAPDHQRICH2  
ANP32A TRAF1  
EPB41 UBE2L3  
DNMT1 BAZ2A  
GAB1 PTPRO  
USP11 CBX8  
NKX2-5 TBX5



UBE2L6 NAMPT  
KRT18 TSG101  
GAR1 DDX20  
VTN CSNK2A1  
MIB1 UBE2D4  
RPS27A SCN5A  
SFPQ NFKB2  
POLR2B LZTR1  
YWHAB PDCL2  
HNRNPK NPDC1  
TRAF2 SHANK1  
TBC1D17 CALCOCO1  
YWHAB MAPK7  
SPG21 RABAC1  
HMGB1 CSNK1A1  
POLR1A POLR1E  
PLCG1 PITPNA  
CDC20 ANAPC10  
BAD WNK1  
GSTP1 TRAF2  
EEF2K MAPK12  
CDC20 FZR1  
MAPK14 CDX2  
SYF2 MCM3  
U2AF2 U2AF1  
RPS27ANKD2  
GRB2 CSF3R  
PGGT1B CDC42  
RAB6A RAB7A  
VAMP2 SYPL1  
HSPD1 HSPE1  
IFIT3 FANCA  
PLA2G10 MYO10  
POLR2C RPF1  
SETDB1 CRELD1  
SFN KLC2  
FAF2 AMFR  
DHPS NIF3L1  
SEC61A1 TSC22D1  
S100A8 PPIA

RELB KPNB1  
PLCG1 PKN2  
IGBP1 CCT7  
F2R GPRASP1  
USP19 LRPPRC  
PRKACA TNP2  
GFER COPS8  
DYNC1H1 MAGED1  
SMC2 TNFRSF10D  
SNRNP200 SNRNP40  
CCR3 CCL26  
MCM5 CDKN2A  
VDAC1 GANAB  
ABL1 P2RX7  
DAND5 CBX5  
MAPK1 DUSP2  
PSMD7 ATXN3  
CDKN2A HIF1A  
EIF5A DOHH  
PHF2 EZH2  
NAA20 IKBKE  
PRPF4 RNPS1  
MEN1 SNW1  
EIF1B UBE2L3  
PRMT5 FBL  
IKBKE OTUB1  
ACTR1A NUMA1  
TIRAP RNF216  
BRCA1 BLM  
TACC2 RXRB  
UBE2N RNF152  
HRAS GRB2  
POLA2 SETDB1  
LYN CD36  
FYN TRPC6  
ATXN1 ACACA  
LIMS1 RBBP8  
PSMD7 RAB1A  
MEN1 HDAC1  
MYBL2 ZBTB9

BAG2 MAPKAPK2  
APLP1 UTP14A  
THRB COPS2  
CRK DTX1  
SMAD9 UBE3A  
USP4 USP32  
TADA2A TP53  
PDPK1 AKT2  
TAF4 CBX3  
BCAR1 TNS1  
GNB2 MAP3K3  
BACH1 XPO1  
RING1 PHC2  
FLNC OTUD1  
TCEB1 CISH  
PLCG1 GIT1  
PDPK1 AKT1  
EFTUD2 SRRM1  
KIAA0174 CHMP1B  
MED14 MED10  
SEPT1 TOLLIP  
CNOT3 CAND1  
S1PR1 GNAI1  
CCDC85B DUSP13  
SP100 NIPBL  
RRP8 SIRT1  
ATXN1 ZNF804A  
JAK2 PPP2R5A  
PMS1 RANBP9  
SLC6A2 PICK1  
IFRD1 RIT1  
DHPS EIF5A2  
GSTO1 SETDB1  
VAV1 CXCR4  
PMS1 CYLD  
EIF5 DDA1  
LIF IL6ST  
SFN RACGAP1  
TOLLIP RNF216  
AKAP8 CASP3

HNF4A SMAD3  
SUPT3H MAX  
GNA12 PRKCD  
CAPRIN1 GIGYF2  
UBE2K TRIM5  
CASP14PRKAB1  
PPFIA2 PPP2R1A  
AMOT AMOTL1  
RPA2 TLE1  
DUSP28HSF4  
CALM2 EWSR1  
EGF DUSP3  
COL2A1 PRELP  
CSTF2 C14ORF1  
S100A1 NIF3L1  
ACLY TNFRSF10D  
PIK3R2 FGFR1  
EGFR TUBA4A  
UBE2K TRIM2  
CDKN1A HDAC6  
MYC TBP  
PSMD3 PTP4A3  
NFKBIE TIMM50  
UTRN SNTB1  
FASLG ARHGAP4  
NFKB1 RPS24  
MCM3AP CELSR3  
TP73 YAP1  
HSP90AA1 STAT1  
CCT3 IGBP1  
TP53BP1 TFDP1  
SREBF2SETDB1  
KDM5AMXD1  
MED27 MED28  
NEDD8 COPS6  
ABCF1 LYAR  
LTF LRP1  
CTNND1 PLEKHA7  
EFEMP2 ZNF638  
RAD50 TERF2IP

MAPK14        KIAA1217  
SRC    KDR  
PTN    TAC3  
TSHR    GNAI1  
MAPK1    NEK2  
AGTR1    GNAQ  
GTF2F2    TCTEX1D2  
EGFR    PLCG1  
CNOT6L        CNOT10  
TAF10    USP22  
HNRNPH3        ANXA11  
MYC    TRRAP  
ARFIP2    ARF1P1  
PTPN6    TMEM62  
HDAC3    EWSR1  
STK4    RASSF5  
SF3A1    SMYD2  
MAGEB2        HIST1H2BG  
BMX    RUFY2  
HTT    CTBP1  
RBM23    KIAA1377  
USH1C    QKI  
FASLG    MACC1  
SELE    FLNA  
GABPB2        IL16  
YWHAB        USP43  
CHMP1B        VPS4A  
SMAD9    MGAT1  
KCNH4    GRB10  
YWHAB        SKP2  
PHF21ARCOR1  
TRHR    ARRB1  
NEB    SMURF2  
HMOX1    PSMD2  
BCAR3    LMNB1  
RARB    CEBPB  
SDCBP    NF2  
LRRC59        TNIK  
RLF    CNKSR2  
COIL    MYO5B

RANBP2 TNPO1  
PSMC4 PSMD7  
LSM1 LSM7  
NR0B1 ESR2  
ADCY3 CAMK2G  
HNRPDL APC  
SMC2 IKBKG  
TK2 PTPRK  
SHBG SORD  
TFE3 RPL38  
POU2F1SNAPC4  
CETN2 XPC  
MOS MYOD1  
FLNA GRB2  
CHD3 PTPRS  
RALBP1 REPS2  
CHD3 MTA1  
CSNK2A2 PRKDC  
LAMA4COPS6  
PSMD3 ACTR3B  
AP1G1 KIF13A  
SHC1 TEC  
HLA-C CALR  
ATF5 DISC1  
LGALS9 SLC1A5  
PRMT5 MBP  
KDM1AHIST1H3J  
SYNE2 PLEKHA5  
CHEK2 BRCA2  
MAPKAPK2 PHC2  
EEF2 TRPM7  
FASLG SH3PXD2A  
MED25 MED17  
WIPF1 PRPF40A  
ZNF417 BEGAIN  
S100A4 MDM2  
MED30 MED4  
RBBP7 ING1  
TRIM38UBE2U  
GNB2 GNG12

CDK2AP2 WARS  
VARS DMWD  
CCDC14 UBQLN4  
DOK3 INPP5D  
GDF9 MYCBP  
YES1 SPRR2A  
KAT2A SMAD5  
UBC UBASH3A  
FLNB ISG15  
PPARG SETDB1  
SETDB1 PGAM5  
SOCS1 TEC  
PIK3R1 SEPT2  
SMURF1 LHX9  
SRC PTK2  
GNB1 PTH1R  
STRN STRN4  
LECT1 FURIN  
CDH6 CDH10  
TOPBP1 BRIP1  
LDB2 TSNAX  
SMAD3 ZBTB16  
MAP3K7 SLC9A1  
USP11 ATG4C  
JAK1 IL6ST  
BMP6 NCOA3  
RB1 SPI1  
TBC1D4 NAV1  
YWHAB HDAC4  
PRNP PVRL1  
TOP1 TOPBP1  
CRK KIF22  
EXTL3 PIK3R1  
MAF MYB  
RPS27A AIMP2  
GATA1 MAPK3  
PIK3R1 SNX17  
ARPC2 SNRNP48  
ZC3H14 SRRM1  
NCOA6 ASH2L

ARRB2 TRAF6  
POLA2 STK40  
RNASEH2A PKIA  
APP SHC1  
CDK1 MCM4  
MATK PTK2B  
ADAM10 EPHA3  
PKD1 HDAC9  
PPP2CAGAD1  
GSTO1 TRAF6  
RPS27APDCD4  
EEF1E1 ARF6  
NCOA6 PPARGC1A  
UBE2W ZNRF4  
ITGAL RANBP9  
GRIN3B GPRIN1  
MAP3K1 USP9X  
CD82 HBEGF  
GSTM4 INSL6  
ELAVL2 HNRNPAB  
UBE2K RNF114  
NECAB2 CENPO  
ABL1 DOK1  
VIM DCTN1  
AURKBANKZF1  
FOS ANP32E  
HSPE1 TNFRSF14  
RPS27ACRTC2  
CIR1 HDAC2  
SKP1 FBXW7  
DYNC1H1 PHLDA3  
CSTF2 KAT5  
PIAS4 IRF7  
MEIS1 EMX2  
ARF1P1GGA3  
SORT1 GGA1  
SGK1 BRAF  
DDB1 GSTK1  
SORT1 GGA2  
ATG5 PA2G4



PRNP CCDC149  
APLP1 EEF1A1  
PTK2 ARHGAP32  
MAGEB2 RPL31  
FN1A ACVR1  
SMAD3 SMARCC2  
CD74 HLA-DPA1  
COPB2 BRF2  
SERPINH1 TSC22D1  
TYRO3 GAS6  
DYNLL1 BMF  
HTT SUMO1  
SUMO1 ARX  
DMWD DCXR  
PXN ARHGAP5  
TRIM23 C19ORF57  
SMC2 MYC  
PTPN6 MAP3K4  
NTS ACE2  
DNAJB1 AKT1  
LYAR RSL24D1  
DKC1 RUVBL1  
H2AFJ RAN  
CHD3 INSL6  
DDX5 ARF6  
ACVRL1 TGFBR2  
LAMC1 ATF7IP  
PDXDC1 GIPC1  
PDHB BRF2  
OGG1 XRCC1  
MED18 MED17  
FGA THBS1  
ATP1B1 INSL6  
PTPN4 ATRX  
SKIV2L2 EXOSC6  
PHB NAP1L1  
TAC1 BAG6  
PRMT5 SMARCC1  
MYC MYO5A  
NCL WNK1

APC MNS1  
UBE2M CPNE1  
CLPS LIPF  
RHO GRK1  
CCR3 CCL13  
FN1 TRIB3  
GPI CSNK2A1  
ITGB5 LTBP3  
SMURF1 PDLIM7  
DAZAP2 TCF7L1  
MED7 MED19  
CDC20 FBXO5  
SNRPC SRRM1  
HLA-C LILRB2  
LTA4H MCC  
PPP1CB CDKN2A  
MIP CALM2  
POLR1E RNMTL1  
CDK4 GEMIN4  
RASA1 RAP1A  
MEPCE RPAP1  
ORC3 PLCG1  
ARRB2 CALM2  
NCK1 SCARF2  
TLR2 TLR1  
GCA SRI  
SHPRH USP36  
PNKP SMAD5  
PTPRS UTP14A  
MYC NOC2L  
ABCB1 PHB2  
PIK3CANOTCH1  
SHC1 NTRK3  
MED29 MED23  
CREB1 HDAC1  
SGCB SGCZ  
MAPT RPS27A  
EXOSC10 SSRP1  
IFT27 HSPB11  
SSRP1 MYCBP

SGTA SYT4  
ACTG1 SUMO4  
ZG16B USP25  
NXF3 NXT2  
ORC3 FYN  
RFC1 TCEAL1  
RRP9 SMURF1  
LGALS1 YWHAZ  
HSPB3 HSPB8  
SKP1 FBXO32  
RPA2 RPA1  
VIM TRIM29  
FYN PKD1  
SPRY1 GRB2  
ERBB2 SRC  
ORC3 LCK  
CREB1 ATR  
SRC EPHB2  
VHL TRMT112  
CNTN2 HDAC1  
PPFIA1 AGTPBP1  
SH3RF1 SIAH1  
PAX7 ASH2L  
GFI1B NELL2  
SFN PKP2  
CSNK2A2 AQP4  
RXRG RPAP2  
SNTB2 DGKZ  
CBFA2T3 TAL1  
FYN EPHA8  
FYN EPHA3  
TCEB1 EXT2  
APP COL4A5  
DVL2 PCBD1  
SRC EPHA3  
A2M ADAMTS1  
APC EXPH5  
CTNNB1 ASH2L  
TRAF2 TNFRSF18  
SET ELAVL1

TCERG1 WWOX  
PIK3R1 ELK3  
CD63 ITGA6  
FGF2 CSNK2B  
CDKN2D CDK6  
RTN3 COL4A3BP  
NTRK2 KIDINS220  
WNT2 FZD1  
SHC1 YWHAZ  
AR SMARCD1  
RHD BAZ1B  
APAF1 FEM1B  
BCL2 VRK2  
IRS4 ALK  
HAX1 ABCB4  
SKP1 CDCA3  
FYN DLGAP4  
EZR FADD  
CNGB1 PNN  
BMPR1B SMAD6  
PHB PBRM1  
MAPT RPS27A  
ATF3 FHL2  
COPZ2 COPG2  
CRMP1 BTBD2  
CREBBP RUVBL1  
RAF1 BRAF  
FYN CYP4F8  
DBN1 NIPBL  
NPHS1 FYN  
SEC13 NUP160  
ABL1 SHC1  
ABL1 PTPN6  
CTNNB1 HDAC6  
NOTCH1 WDR12  
E2F1 BTG3  
RELA AKIP1  
SMURF1 AVEN  
CD46 STK39  
AGR2 MLH1

ACTR5 INO80  
APLNR APLN  
CSNK2A2 BRF1  
IRS1 YWHAE  
PRPF40A SMAD4  
NBN MRE11A  
SRC SHC1  
ABL1 EPHA3  
SREBF2MOAP1  
SRC PTPN6  
LPXN HOXA1  
HUS1 HPRT1  
ATP5F1 TSG101  
TCEB1 CUL5  
DNM1L UBE2H  
FYN EPB41L3  
ABL1 EPHB2  
FYN SHC1  
EIF1B GAPDH  
SLC9A3R1 NOS2  
MSH6 PRKCZ  
SLC9A3R1 CTNNB1  
COMMD1 COMMD5  
GATA1 ZFPM2  
VIM CRMP1  
ACTB ACTC1  
STK16 EXT2  
NHP2 IKBKG  
ACP5 SNRNP40  
AKAP6 RYR2  
HMOX1BLVRB  
HARS TNIK  
EIF4E2 EIF4ENIF1  
LMO2 KDM5A  
MYST2 MEAF6  
SRRT GIT1  
ZYG VAV3  
MCM2 PRKAG1  
PCP2 LAMC2  
PCP2 LAMB3

NDC80 MAD1L1  
YWHAG ARHGEF18  
SMCP KRTAP4-12  
SH3BP5DISC1  
RFX5 HDAC4  
RBBP7 APPL1  
RALB PLCD1  
MAPK12 PKN1  
NPM1 AKT1  
SKP1 FBXW5  
NOS1 CAMK4  
RDBP C19ORF29  
HCK SH3KBP1  
PIAS2 SMAD4  
NTRK2 FRS2  
IL2RA ICAM1  
MAP3K1 ALK  
CDC27 CDC20  
SLC9A3R1 RDX  
SLC9A3R1 NF2  
ZMYM4 KLHL13  
MET RANBP9  
KAT2A RAD50  
FASN NFKB2  
TMPRSS3 EEF1A1  
IL23R IL23A  
RALBP1 TAX1BP1  
LRP2 ANAPC10  
BCL2 EPHB2  
XRCC6 MAPK8  
CIT RHOC  
NAPG RAB11FIP5  
CHD3 TRIM28  
TNFRSF10C SLC25A6  
KRR1 EWSR1  
EIF1AXMAPK6  
CRK SMAD3  
VDAC1 GABARAPL2  
EPB42 MAPK14  
ZYG1 ZHX1

NOS1AP SYN2  
PPP1R15A SMARCB1  
PLCG1 NTRK2  
PSG3 FAM46A  
EIF3E USP20  
CALB1 TRPV6  
SUMO1 DNMT3B  
IFIH1 ATG5  
TUBA3C GRM7  
PSMD11 COPS6  
YWHAH EPB41L3  
DVL2 DAB2  
SPARC CTSO  
SLX4 TEX10  
YWHAH RPH3A  
FOS CABP1  
TERF1 PINX1  
NOS1 ADRA1B  
KHDRBS3 RBMX  
CBL KHDRBS1  
DPEP3 DDX5  
HLA-G KLRD1  
NCOR1 NCOA1  
SERPINA1 PRSS3  
KDM3BUSP18  
RFX1 RFX2  
SGCB SGCD  
MDC1 RAD50  
PTPN2 STAT3  
IGF1R PRKD1  
SFN ISCU  
GRIN2B INADL  
RFX1 RFX3  
ETS1 RPS27A  
VPS39 HOOK1  
LCK SHC1  
SUMO1 SAE1  
MRAS PIK3CA  
YWHAG FOXO1  
MAPT CASP8

DNMT3A EZH2  
APC SYNE1  
XRCC6 CBX5  
CTNNB1 NLK  
PSMA3 PSMD4  
GDI2 TNFRSF14  
NOS1 ADRA1A  
UBA3 UIMC1  
TCEA2 FAM190B  
STK4 C20ORF94  
IRS1 CAV1  
VHL GLRX5  
SOCS1 PIM2  
LCK PTPN6  
EXOSC5 EXOSC3  
ITGB1 CD82  
HOXD4 HIPK1  
NCOR1 TAF6  
NLRP3 NLRC4  
APC NAV1  
GNL3 ASCC2  
DLST CCDC86  
PTPRC ITGAL  
CBL CDC42  
FIBP CSNK2A1  
CAMK2D CAMK2A  
SPRY2 RPS27A  
VASP APBB1IP  
TSPAN3 EWSR1  
NTS NLN  
RFX2 RFX4  
PITPNBLMO4  
LMO2 ISL1  
RHOC RTKN  
KPNA4 RAC1  
RHOA ARHGEF19  
CSNK1A1 MDM2  
VHL PFDN2  
BRCA1 TERF1  
RER1 SH3GL3



SPRY2 GRB2  
CUL1 FBXO33  
SELENBP1 POLDIP2  
TRIM38RIPK1  
UMPS CASP4  
ACTL6A RUVBL2  
PLK1 DCTPP1  
CTTN ANKZF1  
BRCA1 UBE2J1  
INTS1 RPAP3  
ASPM SMYD2  
TOMM20 PINK1  
GNB1 CAV1  
AK2 PAK2  
SS18L1 PCGF6  
NFKB2 TNIP1  
IMMT PIAS4  
TP53 EP300  
TNKS LNPEP  
TP53 TP63  
COPS6 STK40  
NFKB2 EFTUD2  
PRKCZ BTK  
RAC1 C2ORF67  
ATF3 RELA  
SOS1 ZNF804A  
BBS2 FHOD1  
SRC NOS2  
RPS27AKLHL12  
EFTUD2 RPAP3  
EPB41 HADHA  
KCNJ2 KCNJ16  
FANCA FYN  
MYC NUMA1  
CMPK1 TNIK  
YWHAQ NFATC2  
CDH2 PTPN6  
SRC CTNNB1  
RIPK1 RCN2  
ISG15 USP18

RPA2 SERTAD3  
GNB1 GNA12  
PTPN6 FCRL3  
SIN3B HDAC2  
SULT1E1 UNC119  
UBC BIRC2  
FRS3 KARS  
TH MAPKAPK2  
RFC1 MSH6  
PXN PTEN  
HDAC3 RBM15  
TBP AHR  
MAP2K7 TRAF6  
TRIP4 SHD  
NUPL2 TAP1  
NCOR1 NCOR2  
GPRASP1 STMN2  
PF4 CXCL12  
PLCG1 RIN3  
BRCA1 RAD23B  
KIF3B LMO4  
RXRA GADD45A  
PTK2 LENG8  
STRN GNAI1  
MYCL1 MXD1  
MCC RAB2A  
SMAD3 KDM2A  
MED7 ESR2  
HIPK3 DAXX  
GAPDH SUMO4  
ATP5A1 ATPAF2  
PRNP TSC22D4  
HSPE1 CRMP1  
HGS PLD3  
FLT3 PTPN12  
CSNK2A2 CABP1  
TFF1 UBQLN1  
ASGR1 CLEC4G  
GRB2 FRS2  
APBA1 KCNJ12

GOLGA4 BIRC6  
KIFC1 CXXC1  
ACTL6A RUVBL1  
HNRNPH1 CCT4  
PFN2 PRKAB1  
TANK MAP4K5  
PFN1 WASF1  
POLR2L MED19  
MED18 MED9  
KIF20B RUVBL1  
ITGAV ICAM4  
EGFR OLFM1  
SRRM1 SRRM2  
TBPL1 PTC3  
SLC25A5 NFKBIA  
CCDC106 C14ORF1  
ABL1 SFN  
PDGFB THBS1  
ABL1 YWHAB  
LIN7B BAIAP2  
FER ERBB3  
APOB PDIA4  
PDZD3 SLC22A9  
MUSK PDZRN3  
RAP1GAP RAPGEF2  
TNFRSF1B KPNB1  
CCNA1 CABLES1  
MAPK1 STAT5B  
P2RY1 SLC9A3R2  
TAB1 TUBB2B  
HLA-B ADSS  
GDF9 MPHOSPH6  
METTL11A IKBKG  
NFATC1 YWHAZ  
STAT1 CXCR4  
RAF1 YWHAZ  
TMEM67 MKS1  
HSPE1 IKBKE  
FABP4 OSTF1  
LUC7L3 MEPCE

FHL2 SPHK2  
ACTN1 PTK2  
IFNGR1 PTPN11  
RNF4 UEVLD  
FCHSD2 CCDC158  
FGF2 PTX3  
XRCC5 TERF2IP  
CASC3 RBM8A  
PBX1 SMARCD3  
IRAK2 PELI3  
GNAI1 RGS18  
SNRPB TNIK  
MYOD1CDK2  
CHD3 GPS2  
CIAO1 BAG6  
ATXN1 YWHAZ  
CHD3 TNFRSF14  
TP53 VHL  
UBE2G2 ZNRF4  
PXN ITGA9  
PIAS1 MDM2  
AR MYBBP1A  
S100A4 HBEGF  
NR3C1 NCL  
VAPB MTNR1A  
PARP1 CDKN1A  
AR FHL2  
CCNA2 DTNBP1  
CDC73 WDR61  
AR APOL3  
TRAP1 PINK1  
ARAF HELZ  
IKBKB HSPA1L  
APPL2 RUVBL2  
YWHAG TUBA4A  
GFRA3 ARTN  
APP MAST1  
NPTXR NPTX2  
CFTR CLCN3  
DNAJC19 PAM16

NFKB1A EP300  
AP1S2 GGA3  
SLMAP PDCD10  
TCF3 AEBP1  
AIRE RAD21  
TAB1 MAPK14  
AHR NRIP1  
NOTCH1 JAG2  
MED30 MED29  
TGFB1 CASKIN2  
SUMO2 CDKN2A  
ORC4 RPA2  
FBLN1 HSPG2  
CCDC85B LZTS2  
F8 PROS1  
STAM2 RIN1  
MAPK9 HSF1  
NFKB1 EP300  
CDC25B KRT85  
GAST MEP1B  
WDR77 CTD1P1  
BRCA1 IFI16  
CSNK2A1 SLC18A2  
CCL5 CCR1  
RMND5B UBE2D4  
GATA3 SATB1  
CAD SUMO2  
CCDC85B C7ORF50  
TERT PTGES3  
GRB2 MYRIP  
RWDD1DRG1  
SYN1 CDK5  
SMAD3 AXIN2  
MED25 MED9  
PLD1 PKN3  
TP53 HIPK3  
PFN1 PIK3R1  
NUTF2 NUP54  
AR KIFAP3  
RHOA SMURF1

CAD YWHAG  
ZNF365 DISC1  
AGR2 CRMP1  
TNFRSF10B TNFRSF10D  
WBP2 WWOX  
CALCOCO2 MCM10  
VHL CDO1  
NCK2 ABI2  
MMP2 OSBPL10  
ALDH2 ITGB3BP  
ZBTB25SORBS3  
CDH2 GNA12  
TOB2 CNOT7  
CDK1 MEF2C  
PIK3R1 IL1RAP  
ESR1 PAK6  
LMCD1 IKBKG  
SPINK1 NRSN1  
TRAF2 ZNF646  
RAB27A EEF1A1  
AR KAT2B  
SMARCA4 SS18  
MT-ND5 PACSIN1  
HERC2 CDC42  
WDR1 CFL1  
CD82 NUP88  
HSPA1B HSP90AB1  
MAOA RPS27A  
UBE2I HDAC7  
ETS1 NCL  
STOML1 ACCN2  
ABCG1 ABCG5  
ADCK3 MAGED1  
SGK1 CS  
GZMA LMNB1  
KPNA1 RUNX1T1  
ARRB1 MAPK10  
KLF11 SIN3A  
PQBP1 C14ORF1  
CHMP4B VPS24

RBL1 MRFAP1  
SCMH1 MOBKL3  
SH3GL3 QTRT1  
NFKBIE SKP1  
YWHAZ SET  
EXOC8 EXOC2  
MEF2A HDAC7  
PRKCA ITPKB  
EPPK1 MAP3K3  
GSTP1 SUMO4  
PAX7 RPS27A  
MON1BFYCO1  
POLR1A TAF1D  
MED18 MED29  
UBE2I TRIM41  
TGFB3 TGFBR1  
CCL5 CXCR5  
TCERG1 DIAPH1  
CDH12 CDH18  
PFDN1 RNPS1  
GABRB1 ARFGEF2  
MAP2K6 DCTN1  
ZFAND5 IKBKG  
DDB1 BRAP  
HIST3H3 HIRIP3  
HGS TMCC2  
KIF4A TTF2  
KBTBD7 MAP1LC3B  
NTN1 UNC5A  
EIF2C1 TNRC6B  
DVL3 ZNF408  
SNTA1 MAST1  
AK1 MLL3  
SNAPIN GPRASP1  
CCT3 PPP2CB  
HSF1 RALBP1  
PDCD2 USP43  
CD28 GRB2  
INPPL1 ITSN1  
UBC USP5

CACNB4        MAP1A  
ZNF862 TTC28  
TRIM37FAM107A  
SMAD2 SMURF1  
POLR2F        MED1  
ERCC6 ERCC8  
KCNH4 EWSR1  
SOX9    MED12  
YWHAB        PDE3B  
EZR    PLCB3  
ZNF646 UBE2I  
RFC3    MEPCE  
APC    CIRBP  
DNAJB1        ANK2  
NUMB RALBP1  
CRK    SH3KBP1  
PRC1    USHBP1  
NR2F1 BCL11A  
FXD3 SERBP1  
AKR1B10        ACACA  
NEFL    MAP3K10  
ACTB    EEF1A1  
DDX3X ILK  
PRRC2A        UBAP2L  
RNPS1 DDX41  
SORBS3        DMRTB1  
TRPC3 PRKG1  
DLG1    GLS2  
TACR2 TAC3  
YWHAG        EDC3  
CREB1 MED15  
MAPK3 HSPB8  
TAF11 TAF15  
TBCA    TAF9  
INSL6 FEZ1  
TRA2B SRSF9  
SERP2 EWSR1  
YWHAZ        UPF1  
CD40    TRAF3  
MATR3 PCBP1



PLSCR1EGFR  
YWHAZ COPS5  
MAP2K4 EFNA4  
MTOR PREX1  
SERPINF2 KLK13  
DNAJB6 ALKBH1  
XRCC6 RUNX2  
CREBBP CENPJ  
CRKL USP7  
RBFox2 DAZAP2  
LEP UCN  
C4ORF34 LSM4  
RBBP7 MYBBP1A  
DCC MAZ  
HSP90AA1 FGR  
IRAK1 FADD  
ATP5B ATPAF2  
AQP1 EFEMP2  
PCNA CDAN1  
ETV4 TAF7  
EGFR CAV3  
PLSCR1ABL1  
FBL MEPCE  
CDK1 APLP2  
ANXA3 UBR1  
GFRA2 NRTN  
RPS27ARNF4  
CLK2 ATR  
RLN3 RXFP1  
SMAD4 PARD3B  
RDX ARHGDI  
KCNJ3 GNB1  
SSSCA1CCT3  
SMAD4 PARD3  
NAP1L5 HAP1  
CPSF7 ITCH  
LINGO1 EFEMP2  
PPP1CCPPP1R9B  
SF3A2 PHF5A  
EPOR STAT5A

LYN PTK2B  
STK3 RASSF4  
MECOM SMAD4  
HSP90AB1 NR2C2  
YWHAZ BAD  
DES WNK1  
EFNA1 EPHA6  
PTP4A3 PDXDC1  
TRIM28 NR4A3  
SKIV2L2 XRN1  
AP4M1 GRIN2B  
ZNF197 DISC1  
AKT1 RPS27A  
LENG8 PYGO1  
TRIM37 CCDC33  
TOMM20 CDC73  
APOE PRNP  
IFNW1 IFNAR1  
HAT1 RBBP7  
GRB2 PTPN11  
MCF2L RAC1  
PLSCR1 GNAI2  
CHGB PTEN  
MAGEA11 EWSR1  
PTPN12 RBM19  
EIF3E EIF3L  
PRKACA APOBEC3G  
NCAPH SMC4  
LSM1 GRHRP  
EPB41 ACP1  
FHL2 ZNF331  
PIM1 NUMA1  
FIBP CLEC2L  
EPB41 MACROD1  
ANXA5 EIF4G1  
EIF2C1 DICER1  
APC CYTH2  
YWHAG PI4KB  
NCOR1 NR2E3  
CDC20 ANAPC2

CDC20 ANAPC5  
GJB1 PRKCA  
DDX5 CALM2  
CDC20 CDC23  
CDC20 ANAPC7  
ATG3 OBSL1  
MED6 ESR1  
YWHAZ ARHGEF2  
SUMO2 TRIML2  
YWHAZ TNPO1  
CSNK2B SRRM1  
HBXIP NCOA6  
F11 GP1BA  
COIL SNX6  
UBE2U RNF170  
ANAPC7 ANAPC2  
AKT1 RPS27A  
BRF2 NOC2L  
DOK2 LYN  
DOK2 RET  
POLD1 WRNIP1  
TNFRSF10B FASLG  
GRB2 PDCD6IP  
PIK3CDPIK3CG  
ATXN1 C11ORF41  
FGFR3 GTF3C1  
UBE2L3 SMAD4  
AIRE IPO7  
UBE2L3 BIRC3  
RBF2 GTF2A1L  
TRAF1 TNFRSF19  
NFKB2 KIAA1967  
CDK4 MCC  
RYR1 HOMER3  
ITCH CBLC  
P4HB GABARAPL2  
KIAA0319 FEM1B  
FEN1 RAD9A  
FLOT1 GOLM1  
GFI1B MEGF8

SMAD9 UNC45A  
THBS1 VEGFA  
PSMA7 PSMD4  
IKBKB TANK  
MCM3AP      ENY2  
ATP1A1      NDRG1  
NFIC    ZNF629  
PPM1G GRIA3  
TCEA1 CIR1  
TP53    PLK3  
RAD51 CHD3  
MMP7 FASLG  
UBE2L3      BIRC2  
TGFB1      MYOC  
HIST1H4I    BAZ2A  
HLA-B B2M  
EIF3H EIF4A2  
BMP1B      RRAS2  
FNBP1 DNM3  
PLK1    C2ORF44  
ALB    AGA  
CTNNB1      IQGAP1  
APC    PSMD1  
TARDBP      SETDB1  
IPO5    BHLHB9  
BMP5    BMP1A  
PPP2R1A      MLH1  
HNRNPH1      NFKB2  
BMX    CAV1  
NCL    NUP62  
DCN    COL5A1  
C11ORF16      EWSR1  
EDC3    DCP1A  
DCX    NFASC  
MCC    UBE2M  
PIK3R1 MEPE  
HCFC1 MED25  
CDK1    NUP210  
HIST1H4I      BAZ1B  
ZNF24 C14ORF1

HDAC1 EZH2  
SMAD3 STRAP  
ATN1 PRRC2B  
GRB2 BTK  
CSNK1D PER3  
RZR1 HOMER2  
GTF2F1 PSMC2  
AR SFPQ  
KRT18 YWHAZ  
TGFB2 TGFB3  
CTRL ING1  
EIF3F YWHAZ  
NF2 ARHGAP32  
KIAA1967 ASH2L  
NR4A2 GTF2I  
TRAF2 KDM2A  
PDGFB HNRNPC  
TFDP1 E2F5  
PRDX5 PINX1  
DEPDC1B BRCA2  
GRB2 PPP2R3A  
HDX POLR1E  
APP CHRNA7  
GSK3B MYOCD  
ARNTL SUMO3  
MYO1ESR2  
IDH1 ZHX1  
PIK3C2A MLH1  
CHAT PRKCE  
HIST2H2BE NAP1L4  
FKBP3 HDAC1  
PTBP1 RAVR1  
PAICS PSMC4  
PRPSAP1 TMBIM4  
TRIM28SERTAD2  
F2RL2 FYN  
FURIN LRP1  
PPP2R2A GPRIN1  
ST13 ASF1A  
GOT2 THOC7

B4GALT3 SLC38A1  
NR3C1 NCOA3  
SOS1 FRS2  
UMPS PSEN1  
ASS1 CDR2  
CDK1 CHAF1B  
TIRAP IRAK4  
ATXN1 UBE2I  
CTNNB1 CASP3  
OGT WNK1  
CHEK2 PPP2R5E  
MNS1 EWSR1  
HIST1H3J ERCC6  
GATA1 SMARCE1  
PACS1 GGA3  
ZNF250 NINL  
MAPK14 MLL3  
PTPN6 FCGR2B  
ESR1 ZNF398  
EEF1A1MRPL42  
POLR1A SSRP1  
RECQL5 DDX42  
PAN2 PAN3  
LRP2 DLG1  
STAT1 LDHB  
CCL16 CXCR5  
TRIM28IKBKE  
ARID1A BAZ1B  
TRAF5 CD40  
ATXN3 C16ORF70  
MAGEA11 BIRC2  
SNCG MCM3  
MED30 MED9  
MTNR1A LRRC59  
SYT1 CALM2  
TRAF3 TNFRSF13C  
DAB2 DAB2IP  
TNNI3 TNNC1  
VIM SUMO2  
VCL YWHAZ

PRKCA ITPKA  
SRP14 PRKAB1  
MTUS2 KIF2C  
HNRNPH1 HNRNPU  
VIM YWHAG  
LSM1 HSP90AA1  
WBP4 CPSF7  
HSPA1B ATXN1  
BLM CHAF1A  
PAX6 CDX2  
INADL PRDM16  
GRB2 BLNK  
UTP14A AKTIP  
ESRRG PROX1  
P4HB CUL2  
FER YWHAB  
TEC PTPRJ  
NCAM1BDNF  
KIT TEC  
ZBTB16LMTK3  
DUSP14CD28  
YWHAB BAD  
FHL2 IKZF4  
HIST3H3 TRPM7  
PRKACA GABRR1  
KCNQ5 DISC1  
F8 ASGR2  
ARNTL RARA  
CDC25C YWHAB  
MAP3K8 MAP2K4  
S100A4 UNC119  
CHEK2 DBF4  
OTUD5 LANCL2  
CEBPG GRINL1A  
GPS1 TBC1D17  
SRC SPRR2A  
SYNJ1 AMPH  
CDC20 MAD2L2  
ATF7IP SENP3  
SMG1 SMG5

SMAD2 SENP2  
E2F3 PKIB  
EEA1 KIF16B  
BCL6 ZBTB16  
SSSCA1DCD  
EEF1A1IKBKG  
GRB2 TRIM41  
ENO3 PNKD  
ETS1 ETS2  
DNTT ABTB2  
DLST ZBTB16  
NINL EZH2  
C21ORF63 RBBP6  
TBXA2R GNA13  
GOSR1 STX5  
KLF11 ATXN1  
ESR2 PSMC3IP  
MAGEA11 ACMSD  
ATN1 EWSR1  
YWHAZ SPTBN1  
ZFC3H1CCDC85B  
TRAF2 CDCA3  
GHRH GHRHR  
RBBP5 SETD1B  
ATXN1 QRICH1  
CHD3 IK  
PAFAH1B1 MAP1B  
PPM1B PABPC4  
ZRANB2 SREK1  
RNFT1 UBE2U  
YWHAG CYFIP2  
HLA-B B2M  
ADA ADORA2B  
SNAPIN PLDN  
PTPRF SKIL  
CST6 EPB41  
VHL EIF3K  
CBR1 ERCC8  
MAPK3 DUSP6  
PSTPIP1 GNL3



MAPK3 PTPRO  
AFF3 PTK2  
HSP90AA1 UCHL1  
IKBKAP MCC  
SMAD4 PRKG1  
EIF4E TRAF6  
SSSCA1 PRMT1  
PSEN2 CASP8  
CTBP2 HDAC2  
GDF9 ILF3  
NFATC1 PPP3R1  
FBP1 ATP5J2  
FES IRS1  
PPM1G MTNR1B  
TP73 C4ORF41  
APBB1 CLSTN1  
KPNA6 STAT3  
ACVR1 IGSF1  
SRRM1 SMC3  
RABAC1 RIMS2  
MATN2 MATN4  
VIM PSME1  
SMAD3 LGALS12  
ABCB1 RNF2  
SNRPD1 GEMIN5  
MYC ELF3  
MAP1LC3C ATG10  
MAX PLEKHA5  
TFPT RUNDC3A  
C9 CD59  
TYRP1 GIPC1  
RRP8 SUV39H1  
GSK3B CDK5  
CETN3 SIK2  
SHQ1 WDR48  
GMNN HOXC8  
HIST1H3J EZH2  
MAP2K3 DCTN1  
GMNN HOXC9  
MTUS2 C1ORF216

YWHAE HDAC9  
GMNN HOXA11  
LRP1 SNX17  
KIT MATK  
RNF103 UBE2W  
ALDH2 UNC119  
SLC22A3 NCK1  
LAMA3 SLC35E1  
TAF4 SAP130  
A2M CELA1  
PMF1 COPS7A  
PTN RBM23  
ARIH2 UBE2D2  
CRP FN1  
TNFRSF9 TRAF2  
FAIM3 ANKRD2  
GABRR1 SLC6A9  
GRB2 MLL3  
MTA2 SATB2  
LDB3 ACTN2  
FTSJ1 SRPRB  
SLC9A3R1 GNB2L1  
SCUBE1 SCUBE2  
CRP C1QA  
CRP APCS  
PRKAR1A AKAP11  
PRKCD TIAM1  
SIK1 CRTC2  
PCYT1A CASP8  
UBE2D2 POLM  
IMMT GSTK1  
PRMT5 CAPN1  
POLE2 TLE1  
E2F1 KAT5  
NEFL NEFH  
FBN2 SMAD2  
SMAD3 MTF2  
BAG6 CDK4  
SSSCA1 CCT7  
CSNK2A1 ERH

ZNF91 MAP4K3  
NCOR1 THRA  
APPBP2WDR24  
GMNN HOXA7  
NCOR1 THRB  
RBBP6 MAD2L2  
ARHGDI1 RHOH  
GMNN HOXA10  
ERBB2 HSP90AA1  
FES RASA3  
PGR CDC25B  
NAA38 SART3  
USP13 KCTD3  
RNPS1 GPATCH8  
EPS15 ELF3  
PLEKHB2 KRT82  
MBP PRKCI  
MME ADCYAP1  
GLRX3 PRKD2  
YWHAB CAMK2B  
ETS1 SERBP1  
PSMF1 TRAF2  
CDK1 CCNA1  
UBC KLF1  
PAPSS1 EEF1A1  
UBE2G2 AUP1  
PRPF40A CUL1  
ADRB1 SH3GL2  
ADRB1 SH3GL3  
CSK ARRB1  
MPZL1 EXOSC4  
YWHAZ AHNAK  
EEF1A1 PABPC4  
NUDT21 RPF1  
DDX3X PIN1  
CD79B PTK2  
ABCC3 MLH1  
MDM4 YWHAQ  
CAPN3 YWHAQ  
SIM2 ARNT2

MMP13 LRP1  
CRIP2 PTPN13  
SOD2 SCRNI  
MYLIP CNPY2  
PTPRC CD247  
ATG5 STOML2  
CALM2 CACNA1C  
TP53 UBE3A  
HDAC4 REST  
CD9 CD82  
EIF1B RPS19  
YWHAZ PRKCZ  
ARNTL SUMO2  
RPL22 PINX1  
AGRN PDIA3  
MCM5 USP7  
NEK9 GABARAPL1  
CCDC85B COPS4  
MAPK1 RPS6KA3  
CCDC85B SYT17  
IL1RL1 MYD88  
HIST1H4I EP300  
RHOG PLD1  
NCK1 FLNC  
TFRC TF  
UBE2D3 MKRN3  
GLRA2 FBXL15  
FGF2 SDC1  
APC LRP8  
TGFBR1 PAK1  
RXRB ATP5I  
GNAI3 GPSM2  
COL4A3 HABP2  
PRMT5 JUB  
GDI1 CDC42  
CCAR1 WWTR1  
EGFR ACTA1  
PRKCE TRPV1  
RPF1 PTEN  
RGS20 RUVBL2

MECOM HDAC1  
CCDC85B TCHP  
IKBKE CCDC58  
MAX TRRAP  
HSP90AA1 IP6K2  
VCL PTK2  
TCEA2 DNAJB9  
ARHGAP31 SMURF1  
NUP62 IK  
DLEU1 TLE1  
HNRNPH1 SUMO4  
CCND3 CDK6  
TRIM22USP7  
BLOC1S2 PLDN  
UBE2L6 RNF150  
PTPN3 ZAP70  
PXN TUBA3C  
ESR1 DDX54  
PRKCG CD5  
TBP TEAD1  
GNB2L1 SUMO4  
CCDC85B EXOC7  
RNPS1 MKLN1  
RNF34 DNAJA3  
FNTA RHOB  
OTUD5 CTPS2  
MAPK14 FAM48A  
AIMP2 FHL3  
HPRT1 EPB41  
MYST2 CEP70  
ACTG1 WASF1  
PFDN1 GIT1  
KCNJ2 DLG3  
MOBK3 KIDINS220  
NFKBIE HDAC4  
ITGAV PLP1  
BMI1 CBX8  
PTPRF CDH1  
CCNK HMG20A  
PCNA SUB1

SNAP23VAMP1  
DRD1 ADORA1  
MAL MKL2  
NTRK1 ARHGAP32  
RGS3 CNKSR2  
RB1 PIK3R1  
APC SCRIB  
HECTD3 TRIOBP  
CDKN1A GNB2L1  
GAPDH ATXN1  
ROBO2 ROBO1  
EPS8 MAP3K2  
GAPDH ATN1  
DPM1 ZBTB16  
SARS WNK1  
INHBA ENG  
SSTR2 SHANK2  
MAP2K7 MAP3K2  
RIT1 SMURF1  
SF3A1 GABARAPL1  
RORA PSMC5  
SGTA ZG16  
AR CREBBP  
RELL1 RELL2  
TRIM37ZNF655  
POLR2F POLR2G  
CFLAR USP15  
ATR TELO2  
CCDC85B THAP7  
TBP MSX1  
TNF SPOCK1  
FURIN NOTCH1  
PRKCG ADRBK1  
HIST2H2BE GATAD2A  
PCNA CDKN1C  
MTA2 SRRM2  
KDR COL18A1  
NFKBIE NFKB1  
ETS1 MED23  
VAMP4 STX4

CST3 CST6  
DYNLRB1 PHLDA3  
PLXNA2 PDCD6IP  
BCL10 AKT1  
NTS ARRB2  
ATP5B ATP5C1  
SRPK1 LYAR  
YWHAE TLK1  
TP53 HIPK2  
RAD9A TOPBP1  
BCAR3 ACLY  
NFATC2 MEF2D  
TP53 CDC42  
MYC MT-ND4  
MED1 MED19  
ACTG1 NDRG1  
RAB6A RABGAP1  
IRS4 EGFR  
PRKCE RPS6KB2  
OAT CCNA1  
CFL1 ACTC1  
CDKN1A SKP1  
ACTN2 KCNN2  
INSL6 MPHOSPH6  
CCL2 CCR2  
ZBTB43ARRB1  
CASP1 CASP8  
SMAD2 PRDM16  
SF3A2 SRRT  
CLTC ARMCX3  
TAF4 TAF6  
ATP2A2 TRADD  
HSPD1 YWHAG  
NAPA STX8  
ARHGAP5 SMURF2  
ALB LUC7L2  
ADRM1DDI1  
MEF2D FYCO1  
TJP3 INADL  
ZNF174 ZNF192

SH3RF1 SEMA6A  
GRB2 REPS2  
EFNA4 EPHA6  
EIF3H TMEM203  
USP19 CFTR  
DVL2 PRICKLE1  
RGS16 LYN  
HOXA10 EMX1  
SMAD4 STK35  
GNB1 RIPK3  
MED30 MED17  
DYNC1H1 NFKB2  
HADHA MAP3K1  
STX5 IMMT  
KRT37 YWHAG  
DDT DSTYK  
RAB27A RABGGTB  
HLA-DRA MBP  
PLXNA2 KIAA1199  
FGR DAB2  
RYR1 TRDN  
ZBTB2 CREBBP  
PRKCB PDLIM5  
TADA3 RFX1  
PABPC1 DYNLL1  
MYCN FBXW7  
PPP2R1B MOBKL3  
RARA IRX4  
TRAM1 TRAF6  
APP ITM2B  
MED25 MED29  
ATRX HDAC4  
CELF3 C14ORF1  
NGFR RTN4R  
DDX5 NCOA1  
PIAS1 SNIP1  
BCL2L1 BMF  
HIST1H4I TP53BP1  
CRK BCAR1  
CDK1 DUT



SFPQ RELA  
CLTC REL  
PMPCA MARK2  
SIRT2 RTN4  
HECTD3 STX8  
ESR1 HSP90AA1  
MEIS1 ETS1  
YWHAQ E2F1  
UBQLN4 KLHDC5  
EIF5A XPO4  
EGFR SH3GL2  
SIKE1 STRN4  
EEF2K MAPK8  
LCK NR2F2  
EEF2K MAPK9  
EIF3H EIF3A  
TF IGFBP4  
MOBKL3 FAM40B  
USP7 RADIL  
ANXA1 ATG4B  
MYF5 ELSPBP1  
SMAD9 CAMSAP1  
DEDD PAM  
PTPRC RASA1  
TTC28 BRE  
HOOK2 RIBC2  
KHDRBS3 HNRNPK  
IKBKE SND1  
SKIL SVEP1  
LATS1 CDK1  
CD8A PTPRC  
AXIN1 BTRC  
HLA-A B2M  
ATP5A1 MLH1  
ADRB1 NOS1  
FAM58A NUCB2  
PAK2 ABI1  
NFE2L2MAFF  
MCM3 SSRP1  
EIF3A FBXO32

NDUFS8 GEM  
KIF5B IKBKG  
TUBB SYT9  
PTBP1 SRRM1  
PAICS FXR2  
SMPD3 PLEKHM1  
GTF2F1 AHR  
ARL1 COPG2  
VIL1 JAK3  
KLF6 CELSR2  
TLX2 TLE1  
ACTN1 GIPC1  
XRCC6 DLX2  
PML RUNX1  
KLK3 IGFBP3  
TUBG1 BRCA1  
MYC CHD4  
CAST KIAA0101  
DDX27 LYAR  
USP39 DDX23  
COIL FHL5  
CCNT1 PMS1  
RAP1A RAPGEF4  
WDTC1 DDA1  
BCAR1 PTPRH  
TRAF2 MAP3K5  
TFE3 SMAD3  
PFDN1 MED31  
TARBP2 NUDT18  
HSP90AA1 CHORDC1  
HSP90AA1 TBK1  
PIK3R1 ZC4H2  
GSTP1 MDM2  
UBE2L6 CBLC  
CDK2 CCNB3  
BACE1 SELPLG  
RPL30 RELB  
MLH1 NDRG1  
KIF4A DNPEP  
NLRP12PYCARD

SMARCA4 CDYL  
PRMT5 YWHAG  
YWHAZ CHAF1A  
ENC1 RB1  
BIN1 RAP1A  
ATG12 CCDC59  
GABARAP KBTBD6  
MAPK1 PXN  
CLDN3 WNK4  
FLOT1 CBL  
C7ORF50 LYAR  
TRIM27MCOLN1  
SMAD4 UBE2Z  
POLI POLQ  
NTRK1 PTPN11  
FYN CD2AP  
CLDN6 TJP1  
HNRNPH1 CDK9  
PTCH1 SMO  
NR0B2 SIN3A  
MEIS2 HOXA13  
HAP1 CDK5RAP2  
NFKBIE FBXW11  
BAI1 PHYHIP  
GEM NDUFAF3  
MAPK1 DUSP3  
UBTD1 UBE2D4  
EGFR MAP3K14  
PDPK1 CDAN1  
DTNB HMG20A  
WEE1 CDCA3  
DLGAP1 TANC1  
MSH3 MLH1  
COBRA1 WHSC2  
SYNCRIP HLA-B  
ZBTB7A SP3  
NR4A2 RPS6KA1  
FAS RAP1A  
ZBTB7A SP4  
SKI HIPK2

YWHAB        DYRK1A  
TCEB1 HIF1A  
YY1    CTCF  
ADPGKUBQLN4  
CPSF7 SORBS3  
ATG12 HNRNPA3  
LCK    DOK1  
NPPB    NPR3  
PSMA7 PSMB7  
GRIA4 LGALS12  
SRSF1 NXF1  
CHEK2 TP53  
KCNV2 KCNF1  
TELO2 MAGED1  
RFC5    TSC22D1  
PAFAH1B2    SLA  
SQSTM1        EMILIN3  
TBP    TAF8  
CDK1    MAP4  
CYP27B1        PSMC5  
CREBBP        PIAS3  
TUFT1 TFIP11  
MYOD1KAT2B  
RPL22 GABARAPL2  
UBE2L6        UBE3A  
TACR1 TAC1  
LIG4    PRKDC  
SMNDC1        NINL  
SMC1A RPGR  
EPB41 TXNDC17  
RGS3    GLS2  
STIP1    SUMO4  
SCAND1        ZNF434  
TUBB    YWHAZ  
BCL2L1PGAM5  
GRB2    CYTH2  
SNX2    TSC22D1  
DSG1    DSC2  
KIF3C    CDC5L  
BRF1    GTF3C3

BRF1 GTF3C5  
CDK9 IGF2BP1  
MEPCE TBC1D15  
NCOR1 ETV6  
TMBIM4 PTPLAD1  
CTNND1 CTTN  
MZF1 SCAND1  
HDAC1 ESCO2  
PRNP ZNF192  
CRYAB CRYGC  
CASP1 PSEN1  
JAK2 CCR2  
PLD2 RPTOR  
MAPK3 BAZ1B  
SOX9 SPEN  
STMN1 PPARG  
CDK9 CDC73  
TAF6 TAF10  
NPHS1 MAP2K6  
TRAF1 TNFRSF12A  
EIF1B F8  
YWHAG PPP1R15B  
HIPK3 LIMD1  
HSP90B1 SMARCA4  
CDKN2A CDKN2AIP  
APAF1 CASP9  
SNX15 RABAC1  
SOD1 SSR4  
NCOR1 KDM5C  
U2AF1 RP9  
CBX1 ARL5A  
KAT2A USP22  
TUBB ZAP70  
MDM4 USP7  
AKT1 FOXO4  
PSTPIP1 HSPA1B  
TNF TNFRSF1B  
NDUFA6 TBPL1  
SMARCA4 NCOA1  
AKT1 XIAP

RNPS1 WDR33  
AP1G1 AFTPH  
RHOD HRAS  
SH3GL3 C11ORF68  
KDM1APRKCG  
ARIH2 RPS27A  
RAD23B OTUD1  
AHR NCOR2  
SUV39H1 HDAC9  
RPL8 C11ORF49  
TRIM37MCM10  
RPL31 ASF1B  
OXSR1 WNK1  
UBE2V2 SIAH1  
USF1 CHD8  
UBC MAP3K1  
YWHAB RIN1  
FGFR3 CCDC17  
RND1 ZNF182  
FLG VHL  
ABL1 NBEA  
ATIC IKBKE  
RPS27ASMAD3  
PLG PLAU  
ATXN7 CRX  
CUL4B AMBRA1  
AKT1 PHB2  
EIF1B HPRT1  
MAP2K7 MAD1L1  
CDC7 ORC6  
TLR2 TLR6  
EDN2 KEL  
GOSR1 DSC1  
COBRA1 TCEAL2  
SHC1 IRS1  
NFASC GRB2  
PCBP4 QKI  
CREBBP NCOA3  
RNPS1 ZNF490  
ITGB1 HSPD1

RALA ARF1P1  
KLK2 SERPINA4  
PPP1CALMTK2  
GRB2 SEC62  
PFN2 FHOD1  
CNOT4 CNOT1  
CEBPD CREBBP  
TCEA2 PNN  
LGALS8 TGIF1  
CSNK2A1 PPP1R8  
PTPRB MAGI3  
IGF2R GGA3  
YWHAG EEF1A1  
FOXP1 NCOR2  
MED10 MED29  
ALDH7A1 UBA5  
SPOP AR  
PLEC PLEKHA5  
TRAPPC3 CAD  
YWHAZ MAP2K5  
PSMD11 ZBTB16  
MED29 MED13  
UBE2D3 MAP3K1  
TLR4 CNPY4  
CSNK1E CCNA1  
TP53 DAB2IP  
GMEB2 GMEB1  
PRKCD PAK1  
PBX1 SMARCA4  
ACTL6A YY1  
YWHAZ PAK1  
TRADD KIAA1967  
NUP62 GORASP2  
ZNF259 SUMO4  
PCGF2 USP7  
BCR SOS1  
EXOSC10 USP21  
EIF3D EIF5  
HEXIM1 MEPCE  
PLSCR1LASP1

TTR FEZ1  
KIF1B YWHAG  
KCNH1 KCNF1  
HSP90AB1 FASN  
NDUFA9 MAGED1  
DTNBP1 ABI3  
PLG PLAT  
VDAC1 IKBKE  
HDAC3 PRAM1  
TANK IKBKG  
OFD1 KIAA1377  
TLE1 DAZAP2  
DTNB NUP62  
PALB2 RAD51AP1  
BIN1 PLD2  
IL4R IL13RA1  
POLR1A RPAP3  
VIM TCHP  
ITGB1BP1 ITGB1  
ABLIM1 HOOK2  
SPTAN1 PLEKHA5  
TBX21 ZNF490  
PSEN1 CTNND2  
SLC38A1 KIAA1377  
HIST1H4I NAP1L4  
GATA4 ZFPM2  
TAGLN2 TRAF6  
TP53 ACTA1  
DRD3 GNAI1  
EPHB2 ITSN1  
CDKN1B CUL4A  
HIST1H3J SIRT2  
PLSCR1SF1  
ZFYVE9 STX3  
ENAH BAIAP2  
ST3GAL3 SCAMP2  
CYP27B1 PPP1CA  
TAL1 CHD4  
ORC5 MCM3  
GRB2 PFDN5



FYB WAS  
AK2 TRAF6  
TLE1 MORF4L2  
C1GALT1C1 C1GALT1  
RPS6KA3 ZMYM2  
NCOR1 TAF9  
VAV1 RHOA  
SPTBN1 DCTN1  
GATA2 KAT2A  
NDC80 SPC25  
THRA RPS27A  
ARIH2 RPL8  
CTNND1 SRC  
SVIL LUC7L2  
HDAC1 SMARCC2  
TGOLN2 ABL1  
HTR7 GPRASP2  
U2AF2 SMAD5  
EP300 TGS1  
CAPN1 BID  
ATE1 VHL  
FAM46A RNF14  
LZTR1 WWP1  
DLEU1 GDF9  
WAS SNX9  
ST13 RAPGEF2  
ABCB7 FECH  
RIPK2 TUBA3C  
RBX1 SMAD3  
RAP1GAP ZBTB12  
SPI1 CSNK2A1  
HIST1H4I MAP3K3  
CACHD1 KIAA0240  
MED1 MED18  
KRT2 MDM2  
KRT18 PKP2  
EEF1A1 SMAD4  
SDF4 MAP4K5  
DDX58 ISG15  
SMARCA2 NONO

ACTB CLIC4  
KRT4 USP25  
CCT2 MEPCE  
PDCD6IP GABARAPL1  
HOXD3 DDB1  
ITGB1 ITGA7  
ATXN1 NLK  
TRPA1 CYLD  
ALPL MAP3K14  
TMPO GMCL1  
ACTB SCN10A  
SSR4 PRKAB1  
FGFR1 FLRT3  
PRNP WDR5  
PPP2CACCT7  
GSN SRC  
CYP4V2 SIN3A  
ZG16 UBQLN4  
TBL1X HIST2H2BE  
TLR4 MAPK8IP3  
MED6 MED25  
RAB25 MYO5B  
TGFB3 TGFBR3  
SNTA1 DTNA  
FSHR GRK4  
KIF5C CSNK2A2  
RHOG SMAD4  
CASP9 NOD1  
SPI1 HOXA10  
ESR1 MUC1  
SREBF2SLC41A3  
ASNA1 SERP1  
ATP5C1CHMP2B  
PPP2R2A NDRG1  
VHL HIF1A  
HSF1 TAF7  
FYN SNX8  
RSL1D1MAP3K14  
CCNDBP1 DAPK1  
ST13 TRAF6

NOLC1 E2F4  
CBX1 DNMT3A  
CCNB1 MAP4  
ARRB1 WNK1  
AKT1 MAP3K5  
CDH2 BOC  
HIST2H2BE GATAD2B  
MAPKAPK5 STUB1  
FYN NFS1  
SYK LAX1  
PRPF3 MEPCE  
FYN DAND5  
FYN GPR45  
PABPC1 TNRC6C  
CDH1 BOC  
MED22 MED27  
NOS1 PTPRN  
DNM1 SH3GL3  
DNM1 SH3GL2  
DNM1 SH3GL1  
MCM4 CDC5L  
RAB11A CHMP1B  
MED10 MED9  
CRYAB HSPB8  
MTOR DEPTOR  
UBA1 NEDD4L  
ZNF496 PHF15  
NRD1 HBEGF  
TRIM24ZNF10  
DUSP27TRAF6  
TAF13 SMARCC2  
FOS OPTN  
SORBS3 DDX17  
UBE2I PDLIM7  
EEF1D ELF3  
POU3F3SOX10  
SNAPIN IMMT  
ABL1 HEXA  
CASK LIN7C  
YWHAZ LCP2

TP53 WDR48  
CDK2 CDX2  
SON TRIP6  
APP CAV1  
LRSAM1 UBE2W  
UBE2D1 RNF166  
VHL FSCN1  
WTAP CPNE1  
RPS19 VHL  
MAPT DCTN1  
MAP4K4 KIF26B  
DNMBPNCKAP1  
DISC1 EXOC1  
PAK4 ITGB5  
AR RBAK  
YEATS4 MLLT10  
EP300 CITED4  
RBMXL2 TRA2B  
CCND1 HDAC1  
MTOR RHEBL1  
CACNA1G WNK1  
PRKCZ SQSTM1  
CDH1 USP9X  
STAU1 RPS6  
MAX SHANK1  
TP73 RANBP9  
NEDD9 ITCH  
MSN PRKAB1  
DCN FBN1  
PSEN1 TCF7L2  
PLK1 ECT2  
DAND5 EXOSC10  
MCC PCBP3  
UNC13B STX1B  
TUBB DYNLL1  
CCND3 DTNBP1  
SOS1 RIT2  
SETDB1 ECSIT  
RAF1 PBK  
HPN F7

DST RNPS1  
GLS SNTA1  
CCND1 NEUROD1  
SNAP25STX4  
CCL11 TPI1  
MYH9 NFKB2  
BMP5 NOG  
POLR2E LZTR1  
SF3A2 SF3B5  
SART3 RNPS1  
MTOR PA2G4  
NFKB1 NCOA1  
RBP1 SIN3A  
CSK CAV1  
PTPN4 EEF1A1  
MLH1 MSH2  
PCF11 SRRM1  
PRPF4 WBP4  
GPAA1 PIGT  
TRAF2 MAP3K14  
H2AFX PBK  
PRKG1 SEPT3  
PTPN1 CTNNB1  
KRT18 PRKCA  
VHL GDI2  
TOP2A RPS27A  
NFKBIE VCP  
RPP30 MAST1  
COMT LITAF  
NR3C1 POU1F1  
ORAI1 TRPC6  
HCK CSK  
HNF1A PCBD2  
EIF4A2 GIGYF2  
RUVBL2 NFKB2  
PRSS1 YWHAG  
TP53 ZNF420  
SMAD7 ERBB2IP  
CUL3 PGAM5  
CDK8 MED12

TOM1L1      UBXN4  
LMO4 NHLH1  
ACTB PCYT1B  
HIST1H1T     GSK3B  
CSNK1D      BACE1  
CRH    CRHR1  
RAC1   CAV1  
MYOD1CREBBP  
PRKCE GAD1  
RYR1   RYR2  
BRF2   COPG  
MEF2C ZNF423  
BRF2   AUP1  
CCND1 RUNX1  
CYFIP2 C3ORF10  
ATP1A1      TNFRSF1B  
VAMP7 STX3  
FSCN1 TNIK  
DNAJC14     WNK1  
MCC    PSME3  
MCRS1 UPF3B  
MCM7 CNOT8  
TNFRSF1B     HIVEP3  
ID4    HES1  
LINGO1      KRTAP4-12  
CD2BP2      SFPQ  
RB1    TOP2A  
GABPB2      CIC  
MINK1 CASKIN1  
CALCA BBS4  
BRCA1 TRRAP  
ACTL6A      TRRAP  
LMO4 HDAC2  
ANXA1 PRKCI  
PIK3CDNCK1  
FBP2   CHD3  
CASP1 PSEN2  
ADAM10      SH3D19  
PLCG1 RPL13  
BAIAP2ESPN

TCF3 MAPK3  
SLMAP SIKE1  
PLK4 SMAD4  
CTSD IGFBP4  
WASF1 CYFIP2  
CREB1 POGZ  
GAPDHSIAH1  
NCOR1 ETS1  
BRF2 TNPO3  
SSR4 PHLDA3  
CYBB NCF2  
VIM SYN1  
DNM2 CTTN  
HNRNPK QKI  
HNRNPL PTBP1  
CREBBP GMEB1  
CADM1EPB41L3  
LIMS1 RSU1  
APLP1 DAB2  
UBOX5 VCP  
MCAM UBE2O  
ZMIZ1 PIAS3  
EEA1 ZFYVE16  
PDRG1 RUVBL2  
SLC6A4STX1A  
MAML3 NOTCH3  
STRN PPP2R1B  
STRN PPP2R1A  
PSMD10 ELOVL1  
PIAS1 ZNF76  
PRKCZ PPP1R14A  
NDC80 AMOTL2  
MYC GTF2I  
HNRNPA1 KIAA0368  
TNFAIP3 TNIP1  
EP300 COPS6  
NCK1 EHMT2  
CD44 CSK  
RBL1 DYNLL1  
RELB SMARCD2

RELB SMARCC1  
NUP62 KPNB1  
NFYA USF2  
DVL2 TP53  
ST13 PRKAB1  
MLXIP MLX  
SMC1A USP13  
FKBP4 GLMN  
EPB41 MRP63  
VPS4B CHMP1B  
MED1 MED10  
TFF1 GKN2  
DDN SH3KBP1  
VIM PRKACA  
CD44 GARS  
UBE2H RNF185  
STAMPB CHMP1B  
AR NSD1  
CDH1 ERBB2IP  
TAF6 CHD3  
CTSL1 IL8  
TNFAIP3 YWHAE  
DNM1L MAP3K10  
CCNA2 FEN1  
CDK8 MED20  
CCNA1 CUX1  
LAMA5 LAMC1  
TLR2 NDUFA2  
TSPYL5USP7  
RPS6KB1 TRAF4  
DEPDC1B UBE2D1  
WASL ABL1  
NR4A1 BCL2L10  
TBP PSMC2  
WAS VASP  
TMBIM4 ORMDL1  
RBL1 YWHAZ  
IPO5 GABARAPL1  
SUMO2 ZBTB2  
CEP250 SIK2



CUL3 DCUN1D1  
HIST2H2BE VRK1  
KNG1 CTSO  
TFE3 VARS  
SERPINB4 BTRC  
GABARAP DMPK  
FLT1 SHC1  
TAF12 TAF8  
FLII TRAIIP  
MARK1 USP21  
REST HDAC5  
SMARCD3 NR1H4  
LTF LCN1  
MYC MAPK3  
WDR5 GRWD1  
GATA4 EP300  
SLC38A1 C9ORF46  
USF1 NFYA  
LDLR CREBBP  
XRCC6 SIRT6  
TNKS TERF1  
JAK2 SHC1  
PPP3CACABIN1  
PRKAR1A PYCARD  
STK3 MAP1LC3A  
JAK2 PTPN6  
AR SMARCC1  
EGFR NDN  
HRK BCL2  
S100A6 SUGT1  
TAF6 SMARCB1  
DHX9 MEPCE  
ABHD16A TMEM222  
FOS YWHAB  
PBXIP1 PCBD2  
ATG12 MDFI  
SMPD3 MED31  
APC IQGAP1  
TRAF3 TICAM1  
BRF2 SRPRB

TIAM1 PPP1R9B  
TRIP13 SMUG1  
PIN1 BCLAF1  
IKBKB SMARCC1  
CASP6 CHD3  
LRP2 MAPK8IP1  
GABARAP TUBB4  
CSNK2A1 CHD3  
MPP3 CCDC137  
ADRB1 MAGI2  
EEF1A1 TP53BP2  
PML LRP1  
PLSCR1 SLC25A6  
HDAC3 NACC1  
EPPK1 PHB2  
SATB1 UBE2I  
VHL MALT1  
ATF2 PML  
PTPN6 SIGLEC11  
UTY TLE1  
UTY TLE2  
CREBBP NCOR2  
TCERG1 BRD4  
ZNF41 SMAD2  
RET GRB7  
ITPR1 ITPRIP  
PPP1CARPAP2  
NFKBIE RELA  
DVL2 ZNF165  
ORC2 ORC6  
GRB2 PKP4  
REL COMMD1  
EAPP UBQLN4  
NR4A1 ARHGEF10L  
TTN SMURF2  
DLG4 MAP3K11  
CD4 LGALS1  
CRMP1 PMF1  
HTR2A PON2  
ILK COPG

ILK AUP1  
TCERG1 DIAPH2  
OSM OSMR  
NFYC KAT2B  
ACLY PRKAB1  
CCND1 INSM1  
RARB MAP6  
NDUFB1 EWSR1  
BECN1 AMBRA1  
CLTA MAP1LC3A  
VARS EEF1D  
SH2D1A CD244  
HDAC4 IKZF1  
USP1 FLG  
MCRS1 INO80  
SMAD2 TNRC6B  
ARCN1 COPG2  
TCEA2 WHSC2  
TLE1 PAFAH1B3  
ARL2 UNC119  
PXN GAB1  
KCNJ1 IL16  
RTN4 SPG21  
SREBF1ATXN1  
NCAN PTN  
COIL TAF9  
GRB2 P2RX7  
SLCO1A2 SLC9A3R2  
ATXN7 TBP  
CELSR3 TSPYL4  
GRB2 RIT2  
CPN1 CDC42  
EXOC5 PRKCG  
DDIT3 BATF  
PXN ILK  
TP53 SMAP2  
NUDT21 HDAC10  
PDZD3 SLC22A4  
SPAG6 SPAG16  
KAT2B DACH2

PLD2 PRKCD  
PCNA ATAD5  
RAD51 FAM175A  
YWHAG ZNF839  
CTBP2 PSMF1  
MCM5 STAT1  
COPA TMED2  
ZYG1B1 TES  
USP14 UBE2V2  
NCL PPP1CB  
SMARCA4 STK11  
COL2A1 COL6A1  
STAU1 KIF2B  
STK3 SAV1  
LHX4 IFT172  
ADAMTSL4 CATSPER1  
OSBP VAPA  
BIRC2 IKBKG  
PSMA3 PSMA4  
SOCS2 INSR  
MYC CDK9  
E2F1 CREBBP  
MXD4 MLX  
PFN2 TRAF6  
COG4 COG6  
CYTIP CYTH2  
BRD4 KDM5B  
HSPH1 STK39  
ERBB2 CAV1  
BRCA1 CTCFL  
PLSCR1ZNF638  
TOMM22 TOMM7  
RPL7 RELA  
PPM1G LRPAP1  
PPFIA1 PPFIBP1  
VASP ACTG1  
SMAD2 TRIM33  
TP53 RNF38  
TUBA4A RBM23  
DCN COL6A1

TRAF2 TCEB3B  
AR KAT5  
U2AF1 SRSF2  
LYPLA1 ANXA2  
DDIT3 MAPK14  
HIST1H4I SETD7  
CREBBP TAF6L  
MME NDRG1  
NPRL3 TP63  
ILK SRPRB  
UTRN DRP2  
AP2A1 RAB11FIP2  
PTPRC SKAP1  
NECAB2 CAPN3  
BRCA1 RPL31  
CEBPB APOBEC3G  
FYN PTPN5  
HMOX2SETDB1  
MAGED1 UNC5A  
IGFBP3 POLA2  
NFKB1 RUVBL2  
PTBP1 SUMO1  
TRAF2 RUVBL2  
TLX2 YWHAH  
TP53 FXYD6  
CTBP1 CDYL  
SMNDC1 RUVBL1  
SMAD2 CAMK2A  
KIF5C NCOA2  
CNTN5 APLP1  
NF2 SPTBN1  
PTPRD TTN  
MAGOH WIBG  
MIF4GD UBQLN4  
TRAF2 RUVBL1  
CEBPB RPS6KA1  
CBR1 UBA5  
FNBP1L USP13  
PHF2 RAD50  
DDA1 PA2G4

HSPA9 NFKB2  
PRMT5 PHYHIP  
PFDN1 GPRASP1  
ABCG1 ABCG4  
CREBBP IKBKG  
WASL NCKIPSD  
AP1S1 IKBKE  
IFNAR1ZAP70  
PTK2 BIN1  
VPS41 UBE2U  
VPS26BVPS35  
THBS1 LAMB3  
GFAP PRKACA  
DAND5 ATF7IP2  
HOMER1 AGAP2  
RUNX1T1 NECAB2  
KEAP1 BTRC  
RAD51L1 HIST1H3J  
NFKB1 RUVBL1  
CHGB POLR2E  
H3F3B CBX8  
BRCA1 RBBP7  
NCK1 FCGR2C  
IL5 CSF2RB  
PSMB5 UCHL5  
NCK1 FCGR2B  
STRN3 MOBKL3  
FYN WASF2  
ARRB1 GNMT  
GIPC1 NTRK1  
E2F1 KAT2B  
E2F1 KAT2A  
PRIM1 MRPL38  
SH3RF1RACGAP1  
HTATSF1 EEF1D  
IMMT PHLDA3  
CCDC85B ZNF426  
CD2BP2 AKNA  
SMARCA2 ZMYND11  
RPL23 BCCIP

ACTB WASF2  
SMARCA4 SMAD2  
FLNA SIGLEC10  
TAF1C RRN3  
CDK2 CDC6  
MLLT4 RRAS2  
SMAD3 BTRC  
ATP5B PSME3  
TIMM50 PELO  
PPP5C CPNE2  
PSMD7 USP14  
SMAD9 C10ORF2  
HLA-A RPS27A  
STRN SLMAP  
DLAT PDK4  
MAVS CYLD  
PDGFRB RASA1  
GRIN2A DLG3  
PJA1 MAGED1  
VPS28 VPS37C  
CD22 PIK3R1  
PSMD8 ARF6  
ABCA1 SLC25A34  
RNF4 UBE2D4  
RAP2A SMAD1  
STAMPB CHMP4B  
NFKB1 BTRC  
PIN1 CDK12  
CREB1 PRKG1  
UBE2I MDM2  
MAX MAD1L1  
THRB HDAC2  
CTNNA1 CTNNB1  
EEF1A2NFKB2  
VIM RAD51  
COL1A1 ITGA2  
CSTA KRT1  
S100A10 PLA2G4C  
CDK14 YWHAH  
DYNLL1 EEF1A1

PPP2R2A RRN3  
TCAP TTN  
CSNK2A2 HSPH1  
NFKB1 NFKBIB  
CSNK2B CDK20  
UTRN SNTB2  
NFKB1 TRIP4  
MED24 CDK8  
UTRN SNTA1  
MAML3 ZBTB1  
HLA-B RBBP7  
NR1H3 BARD1  
PDE5A CASP3  
F10 GGCX  
BACH1 DEPDC1B  
TNF ATP2A2  
RAF1 VAV1  
BMP7 SMAD3  
GCA ATXN1  
WDR47 CHFR  
NAT9 C14ORF1  
PAFAH1B1 DCTN1  
DTNB SNTA1  
TLR3 RNF216  
MED10 MED17  
PAFAH1B1 DYNC1H1  
DDIT3 HSD17B14  
PTPN1 CSNK2A2  
UBQLN4 CCDC14  
TNFRSF10B TNFSF10  
PRKAR2A AKAP9  
SQSTM1 LLGL1  
TCF3 MDFI  
CNNM3RBPMS  
DLST MAPK14  
STRN FGFR1OP2  
BRCA1 HIST1H4I  
KIF5B RAPGEF2  
DKC1 SSR1  
HSP90AB1 TAF10



ANK1 TIAM1  
HOXC11 GTF2H1  
CDC20 KDM5B  
SMC4 DNMT3B  
CRB3 PARD6A  
YY1 HDAC4  
MMP2 KISS1  
MAPK1 SREBF1  
CDH1 MAGI1  
UBE2H RNF6  
CD40 TRAF1  
JUND TBP  
MED14 UACA  
USP54 CHMP5  
ADRM1 PSMD1  
GHR PLCG1  
PCBD2 MED4  
ATG12 HNRNPAB  
IRF2 EP300  
TAC1 TACR2  
PSMC4 PSMD10  
CSDE1 MCC  
GATA2 CREBBP  
SMO PTCH2  
TRDMT1 UNC119  
UBE2I RNF133  
SPTBN1 IKBKE  
NR5A1 ZNF653  
PAX8 UNK  
EGFR PDCD6IP  
SLC38A1 FTSJ3  
DNM1 ASB13  
STRN3 PPP2R4  
HSP90AB1 TRAF2  
SLC3A2SLC7A5  
SETDB1 DNMT3B  
PTBP1 YWHAZ  
POLE2 C14ORF1  
KIT DOK1  
RARA NCOA6

NCK1 DAG1  
EP300 MN1  
GRK5 CABP1  
FYN FAM110A  
TP53 INGX  
NPM1 PIK3R1  
MAPT CASP1  
MAPK14 MYEF2  
RHOG IQGAP2  
PLA2G2A PLA2R1  
CDK2 CCNA1  
USP1 PKP1  
EIF1B GOT2  
PIK3R1 PIK3AP1  
NAA10 NAA15  
NKX2-1 GRB2  
CDK5RAP3 WWC3  
YWHAQ TUBA3C  
E2F1 NCOA6  
RAP1A RASSF5  
TACR2 TAC4  
PIAS2 SLC7A9  
MED15 TRRAP  
NCK1 DOCK1  
EXOC5 RALA  
RBL2 RINT1  
NOS1 DLG4  
EP300 DBP  
CCND1 CUL3  
CDKN2C C7ORF64  
SQSTM1 ASPH  
PEX10 UBE2I  
STK11 AP2M1  
RB1 BCR  
DAND5 BRCA1  
RNF144B UBE2Z  
SETDB1 NLK  
ESR1 SOS1  
EIF1B TXN  
MEF2A PHB2

GAPDH HNF4G  
SPTB CSRP3  
HAT1 HIST3H3  
TFE3 MARS  
NCK1 ARHGEF7  
NFYB NFYC  
NCK1 CAV2  
PTPRM PTPRS  
CLTC C10ORF88  
CAPZA1 IKBKE  
VCAN ADAMTS1  
HBXIP RABIF  
NXPH3 NRXN1  
CCNB1 RAD23A  
EEF1A1 ZCCHC10  
SUPT5H IK  
HP RBBP6  
TUBG1 CENPJ  
RAB5A RIN1  
PPP2CA HDAC7  
ATXN7 PSMC2  
PIAS1 DNMI  
TCF4 CTBP1  
ITGB1 ITGA9  
S100B DES  
CDK1 CKS2  
MTSS1 PTPRD  
POLI RNF11  
PRKCI MARK4  
NEFM MINK1  
HLA-B RAB5C  
HNRNP3 STK24  
HLA-B RAB7A  
EP300 EID2  
SIGLEC6 LEP  
TGFB1 TTC1  
PTPN6 CSF2RB  
CTSB MARCKS  
IGF1 NOV  
CCL2 MCM7

RAD51 BCCIP  
HMGB2SET  
BCL10 BIRC3  
TXLNA STX1A  
NUP153NUTF2  
YWHAE MSL2  
FEZ1 NDUFB9  
TMEM132A MEGF10  
DTX3 UBE2E2  
HLA-B DHX9  
CBFA2T3 PRKAR2A  
ID2 C7ORF64  
KIF2C CENPH  
BCL10 BIRC2  
SOCS3 JAK2  
EGFR CBLC  
SOCS6 TCEB2  
MARS IKBKG  
TTC35 WNK1  
SLC9A1MAPK3  
SNCA AP1B1  
ATP2C2ORAI1  
SNAP25STX1A  
CASP1 NLRC4  
SOCS6 TCEB1  
BAG3 DAZAP2  
PTPN2 JAK3  
PTK2 NEO1  
SMYD2 AKAP11  
NMT1 CABP2  
MCC MAPRE1  
HIST1H3J PHF8  
GBAS MAP1LC3B  
POLA2 CRELD1  
CRK SNX17  
CSNK1D PPP1R14A  
DBF4 ORC6  
ETS1 HTATIP2  
SCNN1A SCNN1B  
ZMYM2 NR2E1

RARA NCOA1  
SMAD1 PIGQ  
SCNN1A SCNN1G  
TAC1 TAC4  
CTNNB1 CA9  
GRIA2 GRIK5  
OGT RELA  
TFE3 GSTM3  
DSG3 PKP3  
CSF2RB STAT3  
HTT EIF2C2  
ELANE F2R  
FDX1 FDXR  
EEF1D TTC30A  
HDAC3 ATXN3  
CREB1 ZNF92  
CD48 CD244  
MARK2DTNA  
RGS14 GNAI1  
CDK2 SKP2  
TES EVL  
HNRNPD LDHAL6B  
AKAP7 PRKAR2A  
UTRN DAG1  
MCC TSN  
CDK19 MED28  
BLM UBE2I  
CENPA RSF1  
SH3BGRL ERBB2  
RTCD1 FBL  
HNF1A GATA5  
HSPA5 DPYSL5  
CALM2 PINX1  
AP2A2 EPS15  
SFN KIF5B  
RAD17 POLE2  
WAS PTPRO  
PCBP1 TNIK  
CALM2 TRPC3  
TNF ST13

RARB RXRB  
HIST1H3J DDB1  
SMAD1 ZNF251  
MSH6 CREBBP  
CDK1 E2F1  
HIST1H1E CBX5  
SFN USP43  
HIST1H3J SETD1B  
RNF111 UBE2E2  
XRCC1 NEIL1  
RGS6 STMN2  
MRE11A BLM  
CSNK2A1 SOAT2  
MUL1 UBE2D4  
YWHAZ C12ORF51  
CDK5RAP2 HAP1  
MCC NAA15  
MCC NFKBIB  
FOS PML  
MYC MDN1  
FLNB MAP3K1  
KDM1AESCO2  
KIAA0020 HPS6  
RPS27A TRAF6  
APC MMRN1  
MYH6 SMYD2  
ITGA5 RPS27A  
TAF9 TAF2  
CYP27B1 RXRA  
CBL STAT5A  
GRB2 ABI1  
GSTO1 KIAA1377  
SIRT1 ING1  
HSPA9 TANK  
PLCG1 ARHGAP32  
CD79A CD19  
PTGER1 PTGFR  
HNF4A MED10  
YWHAB RGS3  
CCNT1 AHR

EP300 ALX1  
ESR1 TRIM25  
UNC119 RPA2  
CD9 SERPINH1  
ORC2 MCM10  
DDB1 CRBN  
ATP6V1B1 STX1A  
GRB2 DOCK3  
TNFRSF10A COL2A1  
POU1F1PPARA  
PSEN2 DYNC1H1  
OIP5 RAF1  
UBE2D3 RSPRY1  
NECAB2 RCOR3  
GRIN2C ERBB2IP  
MAPK13 ATF2  
PRSS23 TMEM222  
PFN1 RAD51  
NCK2 PAK1  
ZCCHC10 THAP1  
YWHAG PARD3B  
SPTBN2 SPTA1  
MED26 MED13L  
DGKA SREK1  
TPST2 CCR2  
CDH1 ANAPC11  
POLR1C GSTK1  
YWHAG PARD3  
ANK2 TAF9  
PML KAT5  
EIF2S1 TRAF6  
EP300 TWIST1  
CALM2 RELB  
DDT VHL  
F2R SNX1  
RORA SMARCD3  
TXNL4A RHEBL1  
MAPK12 DLG1  
DSG2 PKP3  
NTRK3 FRS2

BECN1 GF11B  
GABARAP SF3A1  
PDLIM1 ESR1  
RAP2A RALA  
SEC22BGOSR1  
UBE2D3 BIRC2  
DLGAP1 DLGAP2  
UBE2D3 BIRC3  
PLAT HMGCS2  
PKN3 ARHGAP26  
MYH9 PLEKHA5  
MEN1 VIM  
OSTF1 MED28  
COIL CYB5R2  
YWHAG RAPGEF6  
RAD21 SMC1A  
STRN PPP2CA  
HGS UBE2I  
KISS1 KISS1R  
LEPR JAK3  
MMP14 CCL7  
RPS27AUSP15  
MMP3 ACAN  
REPS2 EPN1  
MARK2 KIAA0802  
HTRA2 PAG1  
EP300 TRIP4  
FAM107A BEGAIN  
RPA2 RAD9A  
PAX2 BBS2  
MAD2L1 MAD1L1  
APC MAD2L1  
ATF2 YY1  
KDM1ATP53  
SEC61BTRAM1  
EEF1D PHF23  
APC COG4  
CYBA RPS27A  
RGL2 CCDC90B  
PDHA1 PPAPDC2



GBAS GANAB  
MYOD1CBX1  
DDX21 CDC42BPB  
EPS15 NAGPA  
BMP4 CHRDL1  
VCP HDAC6  
MYST2 NINL  
TP53 CEBPB  
COPS6 DDA1  
TP53 ZCCHC10  
GSN CSK  
LMO3 MDFI  
CIC ZNRD1  
PTK2 DDX17  
GPBP1 MCRS1  
LYN RPS6KB1  
AXIN1 PIAS1  
LONP1 CDC37  
NCK2 CBLB  
CDC16 SMAD2  
MRPS21 USP44  
RELA AES  
VDAC3 GSTK1  
GRB2 PABPN1  
SRC ZP2  
MAPT RPS6KA1  
CDK1 STMN1  
MAPK1 TNIK  
NR3C1 NFKB1  
MCC CLIC4  
GHR PTPN3  
UBE2D4 TRAF6  
S1PR4 GNA12  
FLNC SGCD  
TRIP6 STAC  
LIN7A BAIAP2  
BMPR1B SMAD7  
GOLM1 ELAC2  
SLC2A4MVP  
DPPA2 VTA1

ERCC1 ERCC4  
CTNNB1 ERBB2IP  
CRYBA2 TRIP13  
TAF10 TRAF3IP1  
UBE2D4 RNF115  
PDGFRB PTPN22  
POLR1C POLR1D  
MAD2L1 DYNC1LI1  
PML PAWR  
USP14 ADRM1  
BMPR1B CDK4  
TERF1 ATM  
CREB1 FHL2  
LAPTM5 ANKRD13A  
SAP30 NCOR2  
RBL2 E2F4  
PYGM INPP5K  
MCC SUPT16H  
FGF2 CSNK2A2  
RAB5A ZFYVE20  
NCK1 GLTSCR1  
SSB TNFRSF14  
CEBPD SPAG5  
CCDC33 HOOK2  
HCFC1 CREBZF  
CPSF7 GCC1  
AP1S2 AP1S1  
IPO5 TANK  
PPP2R5A SGOL1  
TYK2 IL6ST  
CSNK1D AKAP9  
KIF1C YWHAZ  
PTN UBQLN4  
EZR DLG1  
ERBB2 STAT3  
RADIL ASCC2  
MDM2 TRIM28  
TNFRSF1B ATP5A1  
ANP32A HSPB3  
TBL1X CACYBP

RPN1 ARF6  
PSMD12 PSMD6  
CSNK2A1 HIRIP3  
OSM COL4A5  
GNAO1 OPRM1  
RPL31 LYAR  
JAK1 IL5RA  
IGFBP5 RASSF1  
NGFRAP1 TRAF3  
PELO HEATR1  
DCAF7 DYRK1B  
MED27 MED10  
RXRA MECR  
SRF KAT5  
CDKN2C DRAP1  
RAE1 NUP188  
SRP72 FCHSD2  
HSPA1B RHOA  
RASA1 ABI1  
PRMT5 MYOD1  
UBE2U MYST3  
HSPA4 RELA  
PRMT5 MYOG  
STAT1 SHANK1  
RGS16 GDE1  
RTF1 LEO1  
MEF2D SENP3  
MAP3K3 IKBKG  
MTA2 NR4A1  
NDUFA1 SMURF2  
IFNG IFNGR1  
YWHAE RICTOR  
DLGAP1 SORBS2  
NCK1 NCKIPSD  
RPS27L IKBKG  
CAPN1 F2RL1  
CDK1 HIST1H1A  
WWP2 ATN1  
CDK2 ATIC  
PAX9 FUBP3

ATG12 GABARAP  
PEX19 CDKN2A  
IL1R1 MYD88  
GPAA1 PIGU  
GRB2 MAGI2  
SREBF2 ABLIM2  
FBXW4 RNF32  
EIF2S2 APLP1  
WDR82 SETD1B  
PIK3R2 IRS1  
YWHAE NCOR2  
EIF5B EIF1AX  
HSF1 SYMPK  
YWHAE FHOD1  
HSF1 CREBBP  
RAD21 ESPL1  
AIFM1 MAP3K1  
MYB MED15  
TRAK2 GABRB2  
CRKL MAP4K1  
UBE2L6 TRAF7  
SMAD1 PARD3B  
NBN MLH1  
NEB TMOD1  
PDE1A CALM2  
HABP4 PRMT1  
WIPF1 HCK  
ATR POLN  
MYH9 OVGP1  
HNRNPC TNFRSF1B  
POLR3A RPAP2  
NFKBIA HDAC2  
IRAK2 MYD88  
FXR2 CCDC33  
PLA2G4A MAPK14  
RET PTPRF  
HLA-B PSMD13  
BCAR3 IARS  
ATF2 JDP2  
SNCA TUBA1A

RANBP6 SMAD2  
PINX1 PFDN2  
CLDN4 SHBG  
MTA2 BCL11B  
PPP2R1A PRDX1  
AIPL1 NUB1  
CAPZB UIMC1  
HSF1 HDAC2  
ILK RSU1  
COPS6 CCDC106  
GADD45G PCNA  
APBB1 DDX17  
CDC20 ANAPC1  
CSNK1A1 KPNA1  
PTN RIT1  
MED10 MED11  
CASK ARHGEF7  
ANXA2 GABARAPL2  
RPS28 KRTAP4-12  
TAF1A RRN3  
MUC1 GALNT12  
NTRK1 PTPN22  
HGS CCDC33  
RGS16 GNAI3  
S100A1 CACYBP  
CALM2 CAMK2G  
TNPO2 AICF  
STK16 TGIF1  
NCK1 SEPN1  
TUBA4A TBCB  
APP BACE2  
CDKN2A CDK6  
CSN3 CSNK2A2  
THRA AKAP13  
AIFM1 NFKB2  
RGS2 GNAQ  
SOCS1 KIT  
LRPAP1 SORL1  
ACTN4 MAPK14  
MAP3K7 CAD

TFPI MMP8  
MAPK1 PACSIN3  
UBR5 MAPK1  
YARS TRAF6  
SMAD7 TAB1  
NONO SMARCD1  
RCVRN GRK6  
CALM2 NEUROD1  
TSC22D1 CORO2B  
SFPQ FUS  
PLAT SPARC  
VIM TUBGCP4  
PFN1 NCK1  
RGS2 PPP1R9B  
RAB7A RABAC1  
TEAD1 VGLL1  
MAP3K3 SCIN  
CXADRLNX1  
CALM2 DCTN2  
PTPRF ZNF512B  
BCL2L1 VDAC1  
DNM1 PACSIN3  
CDK5RAP2 C7ORF64  
TAF9 TAF6L  
C6ORF15 ST8SIA2  
NR3C2 HSPA4  
SNRNP200 MEGF10  
CHEK2 RAD9A  
NRP1 FGF1  
TRAIP CYLD  
CALM2 IQGAP2  
POLD1 ATR  
FOS DES  
RAB8A RPH3AL  
IGFBP5 PNO1  
BNIP3L BNIP2  
EPHB2 ABL2  
BNIP3L BNIP3  
SMAD7 PIAS4  
VIM NUP85

PEX26 SUFU  
MLLT4 RIT2  
SIKE1 FGFR1OP2  
FHIT HSPE1  
NFKB1 TNIP2  
KHDRBS3 RBMX  
KRT15 KIAA1267  
ITGAV NID1  
ZBTB16PAFAH1B3  
MED26 MED4  
WWC1 EXOC1  
PLAT HMGB1  
GTF2E1ZSCAN1  
A2M PDGFA  
PCBP1 RALY  
MC5R MRAP  
PCNA GADD45A  
UBE2D1 MUL1  
HRAS SRC  
PRKACA NOS1  
MAGEC1 RUSC2  
MCC GLOD4  
MCC RNMTL1  
NCOA1 NR1H4  
COPS6 BTBD9  
HNRNPA1 MOV10  
RAF1 PRKG1  
SET MEPCE  
PIN1 ZCCHC10  
ILK SF3A1  
MLH1 PMS1  
DCTD LNX1  
LNX1 UBE2Z  
NUCKS1 AK5  
PTK2 TLN1  
ZZZ3 ZNF513  
LBP CAMP  
POLR1A POLR2L  
CDH6 CDH19  
RAP1GDS1 ZNF451

MLLT4 NRXN3  
KLF4 KLF6  
FOS PRKACA  
CHD1L APLF  
CTSB UBQLN4  
CA6 FCGRT  
SOD1 RPS27A  
HOXD4 EP300  
MYBL2 CCNA1  
RPA2 MCM2  
GPRIN1 GRIN2A  
TGFB1 VASN  
RUNX3 HDAC5  
PLG PCOLCE  
KIAA0664 CELSR3  
CCND2 CDKN2A  
TTC1 SH3BP4  
KCNH2 CDC73  
TUB GRB2  
DNAJB1 OTUD4  
RNF13 UBE2D1  
RPS6KA5 EIF4EBP1  
RGS2 NINL  
GNB2L1 HIF1A  
HNRNPA1 SYTL2  
NUP153 YWHAG  
TFCP2 MAP1LC3C  
RPL8 FGFR3  
UBE2D3 CHFR  
CFLAR RADIL  
BMP2K KDM5B  
GRIN2B ARHGAP32  
TNFRSF9 TRAF3  
RELN PCDHA6  
VIM NOC4L  
TP73 AHCY  
CTBP1 HGD  
DLG1 FZD4  
MED14 ACTN1  
SUV39H1 ESCO2



TTC3 GRB2  
COMT TRIP13  
EGFR VAV3  
NOTCH1 POFUT1  
RPS27A PELI3  
SYNJ2BP LRP2  
PRKACA ADRBK1  
VIM UTP14A  
RELA DHX9  
CDC42 KDM2A  
NFYB KAT2B  
TRIM28 TOPORS  
SFN REEP4  
XRCC4 PNKP  
MAPK1 ARHGAP9  
RXRB PPARG  
CFLAR RPS29  
TOP2B BAZ1B  
PDPK1 RPS6KA1  
ARPC1B ARPC4  
DLST RPS27A  
RARA TRIP4  
TRAF3 OTUD5  
RANBP2 CDC42  
ETHE1 RELA  
SMAD3 PITX2  
INSR CAV1  
VEGFA AKT1  
CTNNB1 HIF1A  
PPP2R2A PPP2CA  
GNA12 GNA13  
CRYAA CRYAB  
TCEB1 TRAF6  
DAXX MACF1  
RGS2 GIT1  
MCC COPS6  
CST6 CTSD  
ADAM10 PHB  
SF3A2 SF3A1  
CFL1 CAP1

PTPN13 PKN2  
RARA MED1  
NEDD9 MICAL1  
PTGER1 PTGER3  
SREBF2CREBBP  
MAPK6 NOP58  
ADAM15 SORBS1  
CRKL GRB2  
CTNNB1 FSCN1  
ATRX EIF4A2  
UBE2I TSC22D1  
COL1A1 HTRA1  
NTN3 NEO1  
RHOB SERTAD1  
CBL PIK3CA  
XRCC6 NOTCH1  
NAP1L1 CREBBP  
GTF3C1TBC1D17  
ABCB5 PSMB9  
GZMB CASP7  
MAP3K1 TUBA3C  
GZMB CASP9  
HDAC11 HDAC6  
CUL4A DCAF8  
EP300 NCOA2  
CFLAR SF3B3  
FGF6 FGFR4  
YWHAZ RASAL3  
CTNNA1 DLG1  
CTNNB1 MAGI2  
MCC MCM3  
CTNNB1 USP9X  
STAT6 EP300  
STX7 VAMP7  
SMARCB1 NONO  
AP3D1 ARF6  
BAG6 TAC1  
FLT4 SHC3  
MAPK14 PPARGC1A  
MARK2COL4A3BP

SFN HDAC5  
MCC MCM4  
HLA-B CLPP  
CSF2RA CSF2RB  
MCC MCM5  
MCC MCM7  
ZNF417 MDFI  
GOLGB1 BRMS1  
RPS28 PINX1  
RFX3 EWSR1  
SUMO2 BAZ1A  
TRIM23 SF1  
MLLT4 SSX2IP  
PSMB6 PSMB7  
RAB3A MAST1  
PTPRJ GRIN2B  
SRPRB STYXL1  
PEBP1 PPARD  
MAPK1 EP300  
C9ORF25 WWC1  
MCC HYOU1  
PPARG NCOA6  
GSTO1 C7ORF64  
MED23 FOXJ3  
ACSL3 NDRG1  
DLG1 MYO6  
JAK1 STAT3  
LCK SLC6A20  
AURKATLK2  
TOMM40 TOMM7  
SCAF4 TP63  
CASP3 BIRC3  
CSDA RRP1  
RTN1 FAM160A2  
USHBP1 TUBGCP4  
PSEN1 BACE1  
CD4 PI4KA  
PRKCA C1QBP  
CASP3 BIRC2  
RAN RANBP3

MCC PSMB3  
PMF1 KIAA1377  
CASP3 PICALM  
CDK2 ORC2  
MCM7 MCM10  
TGFBR1 LIMS1  
UBE2I HDAC1  
CDK2 ORC1  
TP53 HABP4  
PRNP BAZ2B  
PPP2CBPPP2R5D  
PSMC4 RNF2  
PIK3C3 UVRAG  
SS18L1 HDAC4  
GFI1B PDE4DIP  
NFKBIA HDAC1  
QSOX1 UBQLN4  
KALRN NDEL1  
TCERG1 HNRNPK  
FOS SET  
NPM1 IRS1  
CDC20 SPATC1  
CASP3 ROCK1  
FAS CALM2  
SHBG PKM2  
NAP1L1 FSD1  
MARK2 UTP18  
GAS7 WAS  
TAF9 KAT2A  
TAF9 KAT2B  
STC2 ARHGEF40  
ARF6 NCLN  
NPM1 HSPD1  
KRAS RASSF2  
UBE2I TDG  
IL12B IL12RB1  
MEGF10 KIAA0564  
ACTB RAC1  
RAB3A RPH3A  
SUMO2 NDUFA4L2

HSP90AB1 AARS  
ITGB5 ZBTB17  
UBE2Q1 RNF26  
MTA2 APPL1  
ABL1 EP300  
EWSR1 CCDC91  
MED13L MED10  
MKRN3 UBE2E2  
MAP2K5 MICAL3  
SORL1 GGA2  
SORL1 GGA1  
TCEA2 CAMKV  
C3 CR2  
RXRA NR1H4  
HDAC3 CNTN2  
BMI1 PHC2  
EPS15 NUMBL  
PTPRS PTPRN  
PAFAH1B1 KARS  
NDEL1 SNX6  
EMD BEND7  
GRB2 STK32C  
CDC7 MCM10  
SORBS3 CBLB  
HPCA NAIP  
MAG PLP1  
EEF1A1 ORMDL3  
RANGAP1 GABARAPL2  
FANCA PLCG1  
TFCP2 OSBPL8  
CFLAR RIPK2  
ELANE CSF3R  
HSP90AB1 PKM2  
MCM6 TRAF6  
XRCC5 TYK2  
GRB2 ZFP37  
MAZ PAK1  
SRC PRKCH  
MCC AK2  
RHOA DOCK7

MYL6 EWSR1  
SRSF4 HAP1  
RB1 RBL1  
UBAP2L ITCH  
C1R C1QA  
C1R C1QB  
MYOD1PBX1  
CD2BP2 USP39  
ADRB1 ADRA2A  
NR1H2 MED1  
GRB2 PIAS3  
GABARAPL2 MAP1LC3C  
TAL1 SSBP2  
MED26 MED30  
PDGFRB PTPRR  
SOD1 PARK7  
ESR1 SMARCE1  
COL11A2 DDR2  
CTBP2 FHL3  
GRB2 RIMS1  
AP1S1 AP1M2  
HHEX TLE1  
PHB LONRF3  
SORBS3 PAK2  
TAL1 HDAC2  
POLR2K POLR2F  
SNAI1 MDM2  
TGFBR1 PREX2  
ATM HDAC1  
ARHGAP32 ATXN1  
GRB2 WASF2  
SUMO1 MBD1  
CUL3 KCTD11  
CYTH3 IPCEF1  
ATM EIF4EBP1  
XRCC5 RBM14  
RORA NR0B1  
ULK2 MAP1LC3B  
HDAC3 PPP4C  
EP300 SS18

RPF1 RAPGEF6  
DCTD CEP76  
VIM MAN2A2  
NFKB1 APC  
AKT1 CASP9  
MYC DIAPH3  
RXRA UBQLN4  
AVPR2 GNAS  
ACTN1 TES  
PDGFRB PTPRK  
STRN3 CTTNBP2NL  
MAPK4 GAB2  
PIK3R1 DLGAP2  
SYT5 RAB1A  
PHGDH TNFRSF1B  
HNRNPA0 CCT3  
AURKATACC1  
ADA DRD1  
TARBP2 NEUROG1  
CTBP2 EHMT1  
FGF18 FGFR1  
HDAC7 PRKD2  
CTSL1 RXRA  
PTPN1 RRAS2  
RIMS1 RAB3C  
CFL1 HUNK  
TP53BP1 DCLRE1A  
BRCA1 PPP1CB  
APP NUMBL  
SYP EPOR  
STX11 PSMC3  
FOS RUNX1  
BRCA1 PPP1CA  
VAMP1 STX4  
FGF2 API5  
SYN1 CAMK2G  
ZBTB17TOPBP1  
CANX MTNR1A  
SECISBP2L TOLLIP  
UBC VPS28

MLH1 BLM  
RANBP10 IGSF1  
UBE2D4 RNF114  
APP AP1M2  
SMNDC1 SF3A3  
XPO1 HSP90AB1  
TP53BP1 CRB2  
GRIPAP1 DAXX  
DLG4 GRIK5  
HIST3H3 TNPO1  
HDAC7 FOXP3  
CCDC158 CCDC101  
STK19 PRAME  
EXOSC7 DIS3  
SREK1 SH3GLB2  
CASP4 PSMD6  
UBQLN4 CRIPT  
ACTG1 RELB  
PPBP EFNA1  
PSTPIP1 FASLG  
SQSTM1 DIP2B  
HOXC8 HOMEZ  
RTN4IP1 EXOC7  
UBE2B RAD18  
COPS5 VPRBP  
NEDD8 CUL5  
EPS15 DNM2  
DEGS1 EGFR  
DLG1 ASAP1  
EPS15 EPN1  
TESK1 SPRY4  
NDUFS2 DMWD  
SPP1 PRKCA  
STRN CALM2  
MDM2 ATM  
SKIL XRCC6  
KLF4 HDAC7  
NCK1 CELSR3  
TAF9 STX12  
PML MAPK7



LCK IFNAR1  
BECN1 TRABD  
SMAD7 CTNNB1  
HSP90AA1 STARD13  
ASB7 RNF7  
NFKBIA CUL1  
PSMC4 PSMD1  
OSM LIFR  
HIST1H4I L3MBTL1  
CSNK2A1 PPP1R1B  
MLLT6 MED15  
RNLS MAST1  
SRC FASLG  
RPL5 PDCD4  
BEND5 CTNNBIP1  
JUND COPS5  
CENPA SHCBP1  
LZTR1 IKBKG  
PPIB TMBIM4  
PIK3CDIL3  
GTF2F2 CKLF  
PRKRIR DNAJC3  
SAP18 EIF3E  
PABPC1 PAIP2  
EIF4E2 EIF4EBP1  
VIM DPPA4  
INHA INHBB  
BACH2 NCOR2  
DAP3 PPARA  
SUMO2 DCD  
CD44 ARHGEF1  
ADAM23 PRNP  
USP19 SEC61A1  
FKBP1A FKBP4  
RELA PPP2R5B  
MAPK6 R3HDM2  
HDAC11 CDT1  
HGS USHBP1  
BRCA1 SMAD2  
BMP4 TWSG1

TOP1 CDC42  
STT3A HJURP  
USP39 DHX38  
BMP2R2 LMX1A  
MYO1D1BHLHE41  
SNRNP70 SMAD4  
RPL31 DDX56  
UBE2D1 TRIM2  
TP53 S100A2  
UBE2D1 TRIM5  
SLC2A1GIPC1  
UBE2D4 TRIM17  
PRKCA HES1  
CARS PACSIN3  
NFKBIA RELA  
NGFRAP1 TRAF1  
MCC CACYBP  
APAF1 BCL2L10  
BRAF TIMM50  
CCNDBP1 ZNF334  
CTNNB1 CDH24  
NR4A1 PML  
A2M LCAT  
RPS27AGMEB1  
FAM165B TMBIM4  
NOS1 RPS27A  
COPS3 IKBKG  
NF2 GTPBP4  
BCL2 PPP1CC  
PSMC3 PSMC4  
XRCC6 SIRT3  
HAUS6 RBM7  
GABARAPL2 BCL2L13  
STX11 PSMA3  
MBP PAK1  
ITGB3BP DDX24  
MAGEB2 CSNK2B  
CLU LRP8  
MTA2 EIF2C2  
UBTF LEF1

BCR MAP4K5  
KPNA6 RELB  
WWP2 TP53BP2  
PRKCB GNA13  
VAMP7 ANKRD27  
NR3C1 TCEAL2  
SULT1E1 Bmpr2  
HOXB9 CREBBP  
TFCP2 TCEAL2  
EIF3H WDR48  
XPO1 PRKD2  
SYNJ2 SYNJ2BP  
VIM PTK2  
SF3B3 TAF9  
FEZ2 SCOC  
HIST1H4I PHF20L1  
CTBP2 AKTIP  
AR SMAD3  
ABL1 SUV39H2  
C14ORF135 DISC1  
PPP3R1 MAP3K5  
MLH1 SEC61A1  
IGFBP3 LTBP1  
APC CEP110  
COPS5 MAP4K5  
LYN MUC1  
HSPB3 RAMP3  
ITGB2 FUT4  
E2F4 DHX30  
SPINT2 ITIH3  
HLA-C WNK1  
EREG ERBB4  
FGR CCR3  
CTNNB1 BCL9L  
RFC5 RUVBL2  
S100A8 CDK2  
RPS27A USP16  
SMARCA4 CARM1  
USP8 CHMP1A  
MYC SMC4

PPARG HNRNPUL1  
SP140 SIRT2  
GTF2E2 ERCC6  
PRSS23 RACGAP1  
ZFAND5 RAD23B  
PIK3R1 JAK3  
NRAS RACGAP1  
MYC PDS5B  
RPS27A INSIG2  
ETS1 WDR17  
JAG1 NOTCH2  
MYC DSPP  
RARA NCOA2  
TCEB1 ASB3  
YWHAE HDAC5  
EGFR RAB7A  
PAPSS2 VHL  
HSPA1L TRAF2  
TNFRSF9 TRAF1  
GFI1B TXNDC11  
CHEK2 PER3  
DAND5 RXRA  
ARAF RRAS2  
RPA3 PRIM1  
SPEN NCOR2  
ALDOA XRN1  
BICD2 ZRANB1  
CUL1 BTRC  
DAND5 HDAC4  
MPZ PINX1  
ENG TGFBR1  
SMAD1 NAT9  
RPA2 PRIM1  
LAMA1 Tmprss6  
TBPL1 ABCF3  
ATP6V1G1 AP2B1  
S100A8 USF2  
CSDE1 NCK1  
DNM2 FNBP1  
UNC5B NEO1

PDXK PRKAB1  
RPS27AKLF2  
GNAI1 GPR50  
TBP GTF2E2  
YWHAZ ATL3  
CD7 PI4KA  
TBP GTF2E1  
BMP6 BMPER  
AQP4 CSNK2A1  
BTAF1 TBP  
C1QBP SRSF1  
SOCS1 GHR  
ERBB3 ODF2L  
PAK1 KIDINS220  
PIK3R1 ARHGAP32  
RPS27ANCOA3  
TP53 DDX5  
BCL2L1RTN4  
F11 HGF  
UBE2I UNC119  
CASP3 CASP2  
VPS26AILK  
CBX3 ZNF462  
USP8 VPS24  
BAG2 NFKB1  
ATF2 CITED1  
COPS6 ORAI2  
COL3A1 FGF7  
RET PIK3R1  
CAV1 SMAD2  
ATF2 VRK1  
CDC27 FBXO5  
UBE2I IKZF1  
IRF2 KAT2A  
IRF2 KAT2B  
ADAM11 STC2  
PFDN1 PSME1  
EXOSC7 EXOSC1  
IKBKB MYH10  
CUL3 COPS5

BCAR1 PTPN12  
MYH9 USP45  
SEC13 NUP107  
XPO1 ERF  
ADRB2 ARRB1  
CLTCL1 PICALM  
PTN SLC38A1  
GEMIN4 NFKBIL1  
PML CREBBP  
ARF3 GGA3  
ARRB2 TGFBR3  
ATM MYST1  
FYN DLGAP2  
PAFAH1B1 PAFAH1B3  
SMAD2 AKAP8L  
DAND5 HDAC2  
NFIA CREBBP  
DOCK1 WASF2  
MSH6 ATM  
YWHAQ HDAC7  
IFIT3 APP  
C13ORF33 TRAF6  
PDPK1 SLC9A3R2  
ACTB DYNLL1  
MTCP1 EWSR1  
RRP1 LUC7L2  
EEF1A2 TRAF2  
IKBKB IRS1  
PAK1 ZNF238  
TSC22D1 MAGED2  
COG1 COG4  
EIF3I SUMO4  
SQSTM1 GRB14  
POLR1E SUPT16H  
PSMD13 NFKB2  
PIAS2 AR  
HLA-B ATP6V1A  
HELLS DNMT3B  
HOXD10 CREBBP  
EPDR1 UBQLN4

TGFB1 SPARC  
ANXA2 TRPV5  
PTN GPD1  
CUL3 RIT1  
DAPK2 CAMK2A  
SORBS2 PAK2  
PTN ACTB  
PDGFRB SLC9A3R2  
P4HB CD1D  
MGMT CREBBP  
BACH1 MAFG  
GRB2 NFS1  
GRB2 SNX8  
CD59 SMAD4  
PRKCG GRIA4  
HLA-C EIF3L  
MLH1 RAD50  
AP2M1 STON2  
CCNE2 CDKN1C  
BCL2 RPS27A  
EWSR1 MYOZ2  
CTNNB1 DDB1  
CAPZA1 SH3KBP1  
TBP RELA  
YWHAZ CBLL1  
HSPA1L MAP3K8  
SLC2A4ESYT2  
C18ORF8 FYCO1  
HIST1H3J ING4  
PBRM1 CHD7  
RPL5 TNPO1  
THRA ZBTB3  
RAB8A RIMS2  
CD19 SYK  
CDK8 MED29  
SPARCL1 DISC1  
GSK3B NIN  
PIAS1 SUMO3  
SORBS2 PAK1  
IPO8 TNFRSF1B

PTN ATRX  
ESR1 PPID  
SOX6 SUMO2  
DHX15 POLR2C  
HNRNPK KHDRBS1  
HNRNPM SRSF2  
RPS27A MAP3K4  
PPBP CXCR2  
PPBP CXCR1  
RPS28 MEF2D  
UBC ASAP1  
HIST1H4I UBE2I  
CCDC134 UBQLN4  
GRB2 GPR45  
SDCBP SDC2  
FTH1 PLEKHA5  
ESR1 RFX4  
DAND5 ESR2  
SPTBN2 ACTR1A  
UBR1 NDUFA4L2  
FOS EPHB2  
PGR POU2F2  
AGT CMA1  
FAM101B PPP1R16A  
TP53 CABLES1  
ATM KAT5  
NPM1 UBC  
PPM1B VCP  
BUB3 DYNLT3  
RALA PLCD1  
UBE2I SATB1  
PLAU PLAT  
RPS27A USP3  
RPS27A EPN1  
CHM RAB7A  
HDAC4 YWHAG  
ATF6 GTF2I  
TCEB1 TSC22D1  
PLG SERPINE1  
TARBP2 RBM14



STAT2 SMARCE1  
DKK1 MDFI  
FADD XPO5  
RPS27ASNCAIP  
SNAPIN MAPK14  
SFN EEF1A1  
STAMBP GRB2  
SYK HDAC4  
PLG SERPING1  
PDCD6IP CHMP4B  
GABARAPL2 HBB  
TP73 MTHFSD  
USP7 BRE  
EXT1 OSTF1  
SH3GL2 ATXN2  
RPS27ATAB3  
CHRM2 GNA15  
XPNPEP1 RINT1  
PTP4A3 UBE4A  
TNFSF4 TNFRSF4  
GRB2 KIF3A  
ERBB2 AIDA  
LCK PTPRK  
EWSR1 C11ORF16  
TOP2B SRRM1  
RORA LMO3  
MAGOH NXF1  
GOLT1A HLA-B  
SNRNP200 SMNDC1  
HOOK2 HOOK1  
UBE2I SMAD4  
HDAC4 SUMO2  
H2AFX WRN  
SUMO2 DDX21  
DAND5 SUMO1  
CNOT3 CNOT1  
RIPK3 SCIN  
HLA-A APLP2  
CUL1 FBXO11  
SORBS2 YWHAZ

RNF130 UBE2Z  
PPP2CACTTNBP2  
WDR5 PAXIP1  
GRB2 FHOD1  
KAT5 RUVBL1  
CSNK2A2 PIN4  
BLOC1S3 PLDN  
SEMA3F TMEM22  
ARID1A ING1  
EIF4EBP1 MAPK14  
BCR TLN1  
HSP90AA1 PTGES3  
RELA LGALS3BP  
EMP3 P2RX7  
DAND5 CREBBP  
REN M6PR  
LAMA4 UBR1  
RPS27AIKBKG  
HINFP TRAF2  
PML HDAC2  
PABPC1 CARM1  
ABL1 NEK8  
SNIP1 GMEB1  
HLA-B RAB21  
ACTB YWHAZ  
DGKQ KDM5B  
DCK GOLM1  
MYH10 PBX1  
GNG3 GNB4  
ANXA3 IGSF21  
GMFB CSNK2A1  
FBL PRMT1  
MCM6 ORC6  
RBL1 NR2E3  
MYC HELLS  
PRKACA GKAP1  
RALBP1 AP2M1  
RHPN2 FTSJ1  
TAL1 KAT2B  
YWHAQ MAP3K3

CDC42 ZNF175  
SNRPB FNBP4  
AXL IL15RA  
PDCD6IP MAP1LC3A  
CD40 BIRC3  
GRAP ARHGAP32  
LRRC4C DFNB31  
MITF TFE3  
FYN ASB16  
BCL2L1AVEN  
ZBTB9 ZKSCAN5  
BMI1 PHC1  
ITCH SNX9  
APBB1 TSHZ1  
CD40 BIRC2  
ALDH2 C14ORF1  
RELB USP7  
RELB USP9X  
CSNK2A1 CFDP1  
CDC42 ITSN1  
OCLN TJP2  
MYB SIN3A  
ROS1 PTPN11  
NUP98 NXF1  
A2M LEP  
KRT18 TNFRSF1B  
PLSCR1ANXA11  
EDNRA KAT5  
DDX20 EIF2C2  
BMI1 KIAA1377  
PGRMC1 PAK2  
SMAD9 ABTB1  
SIP1 SNRPD2  
CIAO1 FAM96A  
SIP1 SNRPD1  
SMAD4 SMURF1  
SIP1 SNRPD3  
MAPK14 ZSWIM1  
ACLY ARF6  
RAC3 RSRC1

MST1R GAB1  
SMC1A PAXIP1  
WDR48 AP3M1  
SETD8 EZH2  
TNK2 CSPG4  
GRB2 NEK8  
CHEK1 PRKDC  
HSPA2 TAB2  
FBN1 FBN2  
DIAPH1PAX6  
RAC3 RBM41  
TCF7 RUNX3  
SHC1 RPL22  
RFC1 SMC1A  
DDX3X FBXO33  
APC LCP2  
RAB5C EEA1  
DAND5 NFKB1  
CHAF1B ASF1B  
CDC16 ANAPC1  
CCNA1 E2F1  
LHX1 FOXA2  
LYN MS4A1  
ESR1 WIP1  
SMAD4 ZBED5  
ERBB3 VAV3  
RAD23B UBA3  
YWHAQ LYST  
CDK8 MED9  
CFLAR NOD1  
MBD4 MLH1  
ARF1P1AP1B1  
TTR APP  
TGFB1 EFEMP1  
FES HSP90AA1  
DVL1 DAAM1  
FYN YTHDC1  
ANK3 SMAD2  
POLR2C POLR2K  
NFKBIA TUBA3C

RANBP2 ARID4B  
SEH1L NUP133  
FBN1 LTBP1  
CAND2 CNOT3  
ACTN4 INO80  
IL2RA IL2  
PRIM2 YWHAZ  
LIMK2 PARD3  
YWHAQ MAP3K5  
PLEC PAN2  
PIK3C2A TARS  
MEGF6 CRKL  
EIF1 UPF2  
EGFR PTRF  
GRM5 GRASP  
MRPL38 C14ORF1  
PPARG RANBP9  
ZFYVE16 RNF11  
ZNHIT1 MAPK14  
PCM1 BBS2  
PRKACA PTPN12  
PDCD7 FEZ2  
SLC3A1 SLC7A8  
RELB SIN3A  
CCNDBP1 MRPS9  
PSMD2 PSMD13  
APBB1 APP  
ITGA2 AUP1  
SNRPB2 HLA-B  
ABL1 ENAH  
PRMT1 DPEP2  
MCM7 HIST1H4I  
CIAO1 TROVE2  
COL9A2 HAP1  
PMCH PCSK7  
HDAC3 TNFRSF14  
SETDB1 ORAI2  
COL7A1 FBXL2  
ATM ATR  
CLNS1A LSM10

TNPO2 PTP4A3  
EZR PINX1  
HLA-B KIR3DS1  
EEF1D DNAJC12  
BUB1B AP4B1  
SLC9A3R2 TAZ  
HOOK2 VPS16  
NFRKB INO80  
ITGB1 VCAN  
ITGB1 ITGA4  
NKX2-1NCOA1  
CRYZ IKBKE  
CLTC SCYL2  
RELA KIAA1967  
COPS6 TRIB3  
F2RL1 RPS27A  
BRCA1 MED1  
ZNF219 SUFU  
KLHL18 COPS6  
HMGB1 RASSF4  
CLDN1 WNK4  
SF3A2 PNN  
FOXH1 NCK1  
SMARCD3 CHD7  
PML TOP3A  
RAN RANBP10  
NOTCH1 XIAP  
SYN1 S100A1  
DAND5 SMAD3  
TRIM21 FBXW11  
ESR1 PIK3R1  
PRPF3 SART3  
NAA38 LSM2  
TCF3 TWIST1  
GALNT14 MUC13  
RGS4 GNAI1  
TRIM35 UBE2D4  
SART3 USP39  
TUB SUV420H2  
ANXA5 ACTG1

ANXA5 SUPT4H1  
GTF2F2 ATF2  
CCAR1 FYCO1  
EIF1B CAPZA1  
HIST2H2BE SUPT16H  
NGF MMP7  
RPS27APIAS3  
TNFRSF13C TNFSF13B  
SKP2 NLK  
RPS5 TBK1  
HSP90AA1 HDAC6  
EFS PTK2B  
RASSF5MAP1LC3B  
AXL IL2RG  
GNA11 MTNR1A  
BCL9 CTNNB1  
MAST2 TRAF6  
ETFA UBA5  
ZMYND11 EZH2  
STAT5B CENPJ  
EWSR1 TRPV5  
CCT3 MAP3K3  
SRC SH3PXD2A  
TSG101 DAXX  
PFN1 INSL6  
DEPDC1B RAD51  
LDB1 RLIM  
PRKAR1A SLC2A4  
MMP1 CD44  
AGRN PRKCB  
GRIA1 CASP8  
ATRX FAM190B  
TP53 CSNK2A1  
RARA NR0B2  
NCK2 ILK  
SRRM2 USP42  
PAK1 NOTCH3  
CDC27 FZR1  
PKN2 MAP3K2  
BRAF MAPK3

LCK IKBKG  
NOS1 VAC14  
CDC27 ANAPC10  
LYL1 NFKBIA  
RAB5A STX4  
SMAD2 ANAPC10  
UBE2D1 UBE4A  
SMAD5 SMURF2  
COL4A1 DISC1  
MDFI TRPV6  
FASN IKBKG  
TTC27 BRF2  
RGS4 PLCB1  
EHMT2 C16ORF48  
DDX5 C20ORF24  
MT-ND4 PYGO1  
DRD2 EPB41L1  
NR3C1 TSPYL2  
NTHL1 MYH4  
MED24 PPARG  
GATA1 AKT1  
MAP7D3 FTSJ1  
EIF2S1 EIF2S3  
RCC1 KPNB1  
HNRNPH1 REL  
ARF6 MEPCE  
BRAF YWHAQ  
APC KIF5B  
HLA-B MCTS1  
HAT1 H3F3B  
BCR CDC42  
ITGA6 CD151  
XRCC6 CDKN1A  
SOS2 SNX9  
RAB27A MLPH  
AURKBRACGAP1  
TAB3 TAB2  
GNL1 PTP4A1  
TAF1 RANBP2  
SGOL1 AURKB



CD81 RBBP6  
CEP110 CALM2  
UBE2D2 BFAR  
HTT CHD3  
MRPS31 LYST  
GCN1L1 CAMKK2  
RGS12 ARAF  
COL1A1 PCP2  
CTNNA1 CDH15  
INSR KHDRBS1  
PARP1 APLF  
PSEN1 FLNB  
MAPK3 PTPN7  
PRNP EIF2C1  
APOE LRP8  
CDCA3 CTDSP1  
CD9 CD81  
PIK3R2 SOCS1  
RBM23 MED31  
HRH1 POLA2  
RPS27L MAP3K3  
CRKL NEDD9  
SSR1 IKBKE  
NR3C1 MLL  
IRAK2 HRAS  
LYN CDK4  
DAXX MAPK8IP1  
PIK3CGPRMT7  
FANCD2 FANCE  
TGFB1 FSTL1  
RIPK1 TRPC4AP  
E2F3 SPIB  
MAPK3 HSF4  
IL2RB SYK  
NQO1 ING1  
TJP1 PLEC  
MARK2DVL3  
CDKN1A CIZ1  
CBR3 ARIH2  
GOLM1 B3GNT4

RCAN1 RPS27A  
HLA-B SEC11A  
NCOR1 NFKBIA  
YWHAB TSC2  
YWHAZ RALGPS2  
RERE NR2E1  
RAB5A TSC2  
RPS16 TRADD  
CALM2 MYO7A  
IRF2 RELA  
AMOT USP42  
MAP2K1 PRKCZ  
CDC42 TRAF6  
STAT6 PARP14  
PGAP3 BTRC  
ESR1 SAFB2  
PITPNAMORF4L2  
SKIL C12ORF10  
YWHAB RGS7  
TICAM1 PIAS4  
FBL GEMIN4  
MARK2 ARHGEF2  
KAT5 CBX8  
KCNA4 DLG4  
MITF TFEB  
TNK2 HSH2D  
UBE2D4 RNF11  
DOCK1 MEPCE  
CIDEA ZBTB16  
NAP1L1 TTLL10  
JAK1 CSF2RB  
JAK1 CXCR4  
SLX4 LRRC1  
KRT85 ATG10  
VCAN FLI1  
NCOA6 SMAD2  
ACTB ACTG1  
COL8A1 ITGA1  
RGS20 RPS27A  
SERPINA3 POLA1

ATN1 EFEMP1  
RAB9A PLEKHM2  
ADRB2 LAMP2  
CLASP1 MAPRE3  
MED8 MED11  
TBP KDM5A  
UBE2U TRIM65  
GNB5 GNG7  
ABCA1 LIN7C  
XRCC6 ACD  
MRPL44 NFKBIL1  
RBX1 DET1  
AURKAPRKACA  
RASGRP1 DGKZ  
MAPT PPP2R5A  
SQSTM1 NBR1  
CCR6 DEFB1  
CYLD TBK1  
FEZ1 PAM16  
COPS6 COPS4  
RGS5 GNAI3  
PRKCH CDK2  
ATP1A3 ATXN1  
NPR2 NPPC  
SUMO1 UBE2I  
OFD1 GPRASP1  
CRYAAALB  
NEK1 KIF3A  
ASAP2 ARF1P1  
AKT1 PLXNA1  
KCNC1 KCNC2  
ATXN1 ARID5A  
RUNX1T1 UBQLN4  
H2AFX DMAP1  
GRB2 AP4S1  
ESR1 FHL2  
MCM6 MCM10  
HOXC9 GTF2A1L  
CLASP2 MARK2  
RBL1 E2F4

TRIM23 CYTH2  
TUBA4A C4ORF17  
C2ORF44 RUVBL2  
SMAD7 TTF1  
HMOX2KIAA1377  
MYB MLL  
RARA PSMC5  
RARB NCOA1  
PSMA7 ATG5  
BMP4 BGN  
IL1R1 TOLLIP  
IRF1 EP300  
PSMB4 PSMB7  
CD8A HLA-A  
KEAP1 FAM129B  
TGFB1 VTN  
HSP90AA1 SLC2A4  
SERPINB5 HDAC1  
HSP90AB1 PPARG  
YWHAE ATP2B2  
HMOX2HAP1  
SETDB1 MRPL44  
FGB FGG  
AMBRA1 ATG4B  
LZTS2 RBFOX1  
RARB SMAD2  
GRAP2 RBPMS  
SKIL SMURF2  
GHR GRB2  
ERBB3 DAPP1  
SMAD3 NOTCH4  
VIM SRRT  
RAF1 TIMM50  
COL4A1 OSM  
HSF1 NCOA6  
HCN2 HCN4  
PIK3CDFAM195A  
CDK5 CDK5RAP2  
PSMB1 PSMB5  
EP300 HERC1

YWHAQ KIF23  
SUMO1 HDAC9  
HSPA5 NFKB2  
TNNI3 PKD2L1  
SOCS6 SMURF2  
PRKCG GABRA4  
MTA2 PARK7  
PGR RELA  
GTF2E2 SUPT16H  
SLC25A5 TNFRSF1B  
FLNA WNK1  
SEPHS1 C14ORF1  
SIPA1L3 SFN  
TGFB1 TGFB1  
RXRG NCOA6  
WRN TERF2  
TGFB1I1 PXN  
SEMA6D PLXNA1  
MKI67 CBX3  
MEN1 HIST1H3J  
ELANE F2RL1  
RASA1 SLC9A2  
SMAD2 LEF1  
SNAP25 ZDHHC17  
CCT3 EIF2B2  
SFN PLEKHF2  
NEURL UBE2N  
MYEF2 HDAC5  
NCKIPSD BAIAP2  
ARPC1B ACTR3B  
GPD1 MDH1  
MAPK1 MKNK1  
SMARCB1 INGX  
IRF3 TBK1  
RIPK2 KCTD12  
RNF8 UBE2E1  
ERBB2 CLNK  
MAP2K1 KSR1  
HNRNPK UBE2I  
TACR3 TAC1

SGTA BAG6  
TP53 EPHA3  
CTNND1 SNCA  
TANK TBK1  
PVRL1 PARD3  
SLC35E1 ABCF3  
PSMD8 PSMD4  
POLR2G MED19  
ATM RAD50  
SYN1 SPTAN1  
VIM ARMCX2  
UBC PACSIN1  
GBAS FKBP4  
CD1D B2M  
BCAR1 PTK2  
PTPRJ GAB1  
BECN1 TP63  
EEF1A1 PHYHIP  
TCEB3 NINL  
EP300 SMAD2  
SOCS7 TUBB2C  
EP300 SMAD1  
RPS6KB1 CSNK2A1  
HNRNPA1 NFKBIA  
SRGAP2 SLC25A12  
PEPD USP7  
NCK1 PLCG1  
N4BP2 TP63  
NCAPG DNMT3B  
MED26 MED8  
KCNJ12 LIN7C  
SORBS3 FASLG  
SYCP2 ACAA2  
CDC27 ANAPC2  
HMGA1 PPARG  
CDC27 ANAPC5  
CDC27 ANAPC4  
CDC27 CDC23  
CDC27 ANAPC7  
NANOS3 ST13

EP300 NCOA1  
ITCH TRPV4  
CDC20 CDT1  
TAF10 ARHGEF18  
PLCG1 PLD2  
RBX1 COPS6  
MYOZ2 EWSR1  
TMED10 GSTK1  
RBMX HNRNPK  
SPOP TRAF6  
SRSF7 SREK1  
SART3 PRPF31  
PIN1 DDX24  
POLR2B POLR2H  
HAP1 NAP1L5  
DSPP PLEKHA5  
ORC3 ORC6  
TAF1 GTF2A1  
LAMB1 PDIA3  
MAGEC1 GTF2F1  
ABI1 EVL  
TAL2 PCBD2  
PRNP ARHGAP15  
UBC RDH12  
SMAD2 STUB1  
RELA EFTUD2  
SMARCC1 SRRM2  
FGF19 FGFR1  
ESR1 STAT5A  
PRKCB NRG1  
HLA-B PFN2  
LTA UMOD  
NTRK1 SH2B1  
ATM AP3B2  
TNFRSF8 ALK  
NAE1 NEDD8  
CBX4 RNF2  
PGK1 NRBF2  
MCM3AP CLSTN1  
CAV1 TRADD

RPS27AHERC3  
PRKCA GRIA2  
BRCA1 NCOA2  
PRKCA GRIA1  
KPNA6 LYAR  
RPS27ADAZAP2  
YWHAZ PANK1  
MTNR1A HNRNPA0  
PARP11RNF114  
HSP90B1 CSNK2A1  
PLAUR FAP  
DFFA CASP3  
S100B AHNAK  
PSMA7 PSMD13  
RPS27APOLD3  
NUCB1 CASP8  
IL6ST PTPN11  
SRC PRKCA  
RPS9 IKBKE  
HDAC1 UBASH3B  
NCL YWHAZ  
SUV39H1 CABIN1  
ANXA4 NFKB1  
SOCS7 PIK3R1  
DAND5 DNMT1  
PQBP1 MED31  
ELANE CAMP  
HMGCR RPS27A  
PRKCB ANXA2  
SMARCE1 BRMS1  
CP SLC40A1  
EGFR SNX6  
NDC80 CALCOCO1  
EGFR SFN  
UBE2L6 RNF4  
BARD1 ZHX1  
EGFR STIP1  
CDK9 LARP7  
ITGAL ESM1  
FHL2 E2F2



BRCA1 TERF2  
HSP90AA1 RALBP1  
TSC22D1 PRPF19  
CFTR PDZD3  
XPO1 CDCA4  
XRCC6 CLTC  
ARPC1A EXOC7  
HBEGF LTBP3  
RALBP1 REPS1  
YWHAG CRTIC1  
XRCC6 HSF1  
ARID1B SMARCC2  
CDKN2A CCNG1  
YWHAG CRTIC3  
EGFR STUB1  
GRB2 CD2AP  
NR3C1 RAN  
EGFR ATIC  
HCFC1 WDR5  
HNRNPC LMO3  
APITD1 FANCL  
ADAM10 LCK  
CFTR KCNJ1  
NGFR TRAF4  
BNIP3L STEAP3  
PLP2 DLGAP4  
YWHAG EML3  
SUV39H1 DNMT3A  
S100B CAPZA1  
TUBB4 RILPL2  
SMAD1 RASL12  
MNAT1 C7ORF64  
COPS6 CRBN  
F2 F11  
YWHAB RACGAP1  
ACTN4 COL17A1  
HOXD4 ETV4  
C1QBP PRKD1  
RAMP2 VIPR1  
CENPA HJURP

VAV1 PTK2B  
AR TRIM68  
MARK4PARD6A  
OPRM1 OPRD1  
MC4R ATRNL1  
SETDB1 PPA1  
ESR1 ISL1  
DAPK1 CUL3  
AP1G1 AP1S2  
CSNK1E PRKD2  
SLX4 EME1  
GSN ACTA1  
SMARCA4 NCOR2  
RIPK2 XIAP  
HLA-B NUDT5  
LYL1 LMO1  
AMBP PIK3R3  
PTK2 GIT1  
GRIN2D INADL  
RAD23B ARX  
CBL ASAP1  
AP3S2 ARF6  
PPP4R2 SRRM2  
SREBF1HNF4A  
HDAC3 CORO2A  
SPTA1 FANCC  
MCC STK24  
PARK2 SIM2  
UBE2L6 PARK2  
GBAS PRKDC  
MARK3PRKCQ  
RORA LMO3  
HDAC4 ESCO2  
PDZD3 SLCO3A1  
IDH3B RAB35  
TGFB1 ACVR1  
EGFR CRKL  
ARID1A BCL7C  
EGFR CRK  
FYN CSK

RAD21 NUMA1  
PRKRIR STK4  
POLDI UPF1  
ZIC2 GLI2  
ZIC2 GLI3  
CLU PDIA3  
GADD45A CDKN1A  
KCNH4 CENPJ  
HSPA1B HSPBP1  
NR5A2 SMARCD3  
HDAC3 KAT2B  
EP300 USF2  
COMMD6 COMMD1  
APLP1 STX5  
STAT3 MTOR  
COPA ARFGAP1  
G6PC FOXO1  
RTN3 RTN4  
GLUL OTUD5  
SOD2 ARF6  
GSC FOXA2  
BRCA1 BRAP  
ANK2 DCTN4  
RNPS1 SRRM2  
TSHR RABAC1  
NCOR1 TCF3  
NOP56 TCOF1  
MARS GIPC1  
CBX4 MBD1  
C19ORF50 EXOC7  
HSP90AA1 NOD1  
EIF3F ASCC3  
CCL18 EEF1A1  
CCT3 NFKB2  
NKTR PACSIN1  
APBB1 KHSRP  
ANK2 TNIK  
CALB2 TUBA4A  
CAP2 PLCB1  
NOS1 HSPA4

FAM135B KAT5  
MLF1 NRBP1  
CDC42 DAAM1  
EVPL SPRR3  
SKIL MORC4  
RPL5 EIF5A  
MED26 POLR2G  
UBE2D1 TRIM25  
MAP3K14 RUVBL2  
DPEP1 KIAA1279  
ETS1 UBE2I  
HIST1H4I ASF1A  
CHD9 NR1I3  
CTR9 RTF1  
SMAD9 SVEP1  
SOCS3 MAP1S  
YWHAZ PPFIBP1  
CD101 SH3GL3  
ADRBK1 PIK3CG  
CASP4 IL1F7  
ZFP36 DDX17  
FOS SPI1  
HDAC1 ARID4B  
BAG6 STX5  
OXSR1 RELL1  
SOCS1 CRK  
PQBP1 WBP11  
UBE2R2 CBLC  
HIST1H3J SETD7  
RGS20 BOLA1  
TNK2 SEZ6  
VIM CDH5  
MAP2K2 GPRIN1  
H3F3B TRIM28  
DAND5 OSBP  
ERH IGSF21  
NFKB1 CALM2  
HNF4G HLF  
POLR1C PHLDA3  
CYP11A1 SMAD2

NR4A3 COPS5  
UBE2D3 RNF25  
STK3 GABARAPL1  
KLHL22 COPS5  
PIK3C2A ERBB2  
RAP2A RUNDC3A  
ELF3 GANAB  
GTF2IRD1 MAP3K2  
APBB1 KAT5  
GTF3C5GTF3C3  
SPTA1 SLC9A2  
HIST2H2BE PARP3  
ARL6IP1 ARL6  
LYN CD79A  
MAP3K14 RUVBL1  
HIST1H1E CBX3  
KRT14 APC  
CBX3 EHMT2  
OTUD4 TUBA1A  
IPO7 RAN  
PTK2 TSC1  
SUMO1 MCTS1  
SETDB1 PAFAH1B3  
SNRNP70 CUL1  
STAU2 KIAA1377  
APPBP2MUL1  
MRPL2 SMURF2  
SPRY1 TESK1  
PKD1 SIAH1  
FADD TRADD  
CTNNA1 MLLT4  
SNX3 FYN  
MSH6 RAD50  
RPS23 MAP3K1  
CHRNA2 CHRNB2  
SYT7 AP2A1  
CBS FXR2  
HAX1 ABCB11  
SNAP25STXBP6  
PAX3 HDAC10

CALM2 SNTA1  
STAMBPL1 RNF32  
SIRT7 MAGED1  
CDH2 LRRC7  
AATK STK39  
CDC42 NGEF  
RNF13 UBE2E1  
S100A8 NFKBIB  
CFTR PRKG1  
HLA-C MAPRE1  
HSPA4 SUV420H2  
SMAD5 SMURF1  
BID FADD  
TSEN15 EXOSC4  
TFAP2A CITED2  
KPNA6 GABARAPL2  
PAX6 SOX2  
MEPCE HNRNPUL1  
ITPR1 BANK1  
INS IGF1R  
SMAD4 XPO5  
DCP1B XRN1  
TCP1 CCT2  
MAP3K3 SUGT1  
CDK8 MED28  
MAPK14 CCDC14  
CBLB CRY1  
ABLIM1 KRT15  
PIK3CARPS20  
PER2 CRY1  
ASH2L SETD1B  
PRKCG ANXA7  
KLRC4 RAE1  
RAE1 SF3A1  
MAX PLEKHF2  
CUL1 TRAF6  
CBFA2T3 PLXNA3  
CRP HIST1H1A  
RBL2 LIN52  
VAMP3 PRKAB1

JAK2 TUB  
PAK1 RHOU  
CHFR GABBR1  
SETDB1 MOBKL3  
CASP3 TRAF3  
YWHAZ CDK16  
YWHAZ CDK17  
FBL KLF6  
MMS19 BRE  
CTNNB1 CDH10  
SPTLC1 RGS20  
ARID1A SMARCB1  
PSEN2 BCL2L1  
NUPL2 GLE1  
SMC5 SMC6  
NFATC4 MAPK14  
IGF1R RPS27A  
RAB27A SYTL4  
PITX3 NONO  
ABCC8 RAPGEF4  
RET MAPK3  
EWSR1 RASSF1  
C3 GC  
DVL1 SMAD2  
DLGAP2 SHANK2  
DVL1 SMAD1  
ADRA1A FLNC  
CDC73 KIDINS220  
ARRB2 RPF1  
ANP32A NSFL1C  
HLA-B BCAP31  
SMURF1 PAK1IP1  
NHP2L1 GTF3C1  
CCND3 TSC2  
IARS YWHAZ  
GTF2I HDAC2  
PRKCA TRIM29  
UBE2D3 RNF166  
NFKBIE PPP6R2  
NFKBIE ANKRD17

PRKAR2B AKAP1  
HDAC1 SMAD5  
EP300 BTRC  
RECQL5 POLR2I  
FHL2 ZNF638  
FOS RNASEH2A  
HEATR3 GSTK1  
AP1G1 BICD1  
LPL UBE2Z  
PPFIA2 GIT1  
SSTR2 GNAI1  
DTNBP1 OSBPL9  
PPP2CASGOL2  
RBPJ NCOR2  
BMP4 GREM2  
KCNJ10INADL  
SFPQ RELB  
UBC POLI  
CD2BP2 PRPF8  
COPS6 KLHL15  
EFTUD2 RPAP1  
WASL CTTN  
MAP3K1 FKBP5  
USP7 PICK1  
PAX6 EN1  
RICTOR RPTOR  
UBE2W TRIM35  
PTPRZ1CNTN1  
NCAPH GSTK1  
CDK4 RFC4  
SF1 ZNF461  
BCR CRK  
BCR CRKL  
HLA-B RPL38  
LZTR1 POLR1B  
ATXN1 BEND2  
ARNTL HLF  
HLA-B DYNLL1  
APEX1 UBE2I  
ASH2L PHF8



HSPA5 SH3BP4  
RAE1 SF3A2  
PSMA3 ATG5  
MAPKAPK2 LIMK1  
SRC PRKCZ  
RAB8A MAP4K2  
TFE3 NEDD8  
PLCG1 CSMD2  
NR1H2 NCOA3  
DYNLL1 DNM3  
KRT18 RPS6KA3  
ABCA4 CNGB1  
TOMM40 HLA-B  
RPS27A TCEA2  
KIT SPRED2  
TNFAIP3 CASP8  
CARD16 CARD8  
MYO1CPOLR1B  
RFX1 ADD1  
ESR1 NCOA6  
HDAC3 LCOR  
CEP110 PCNT  
ARNTL CRY1  
BCKDK TRAF4  
TCEA1 GTF2B  
TFE3 NASP  
CRK SHB  
TIE1 PTPN11  
ATN1 PCSK5  
SNRPD2 KAT5  
APLP1 NACA  
HGS ILKAP  
RPA3 CTNNBIP1  
ATN1 NELL1  
SMARCA2 SIN3A  
POLRMT TFB2M  
EWSR1 PRTFDC1  
PCBD1 ACIN1  
HSPD1 PPP2R1A  
CASP3 PAK2

HSPD1 PPP2R1B  
CBL RET  
RPA3 FYCO1  
IKBKB TRAF3IP2  
CBFA2T2 RUNX1T1  
KAT5 TRRAP  
RAF1 BIRC3  
GAPDHBTBD2  
ACADM SUMO4  
MED28 WWTR1  
ABL1 OSBPL5  
AR SIRT1  
YWHAB MICALL1  
SLC9A3R1 CLCN3  
CDC42 TRIP10  
IDH3B IDH3G  
RELA TAF11  
VHL RAB7A  
PCBD1 MYT1L  
VHL RAB5C  
TNF PDIK1L  
XPO1 DICER1  
AFF1 SIAH1  
RAF1 BIRC2  
IFRD2 USP36  
PSMD10 PSMD6  
BRCA1 RELA  
MAP3K3 MAP3K2  
PSMC2 IKBKE  
SNAP23VAMP3  
CNTN2 KAT2B  
SNAP23STXBP2  
NCK1 KIFC2  
DCD ILK  
MCM7 MCM2  
GRINL1A WDR89  
SNAI1 HIST1H3J  
EPT1 EWSR1  
SAP18 RNPS1  
CPSF1 TAF7

CPSF1 TAF11  
DAND5 RARA  
DAND5 AR  
CPSF1 TAF13  
NPPB HDAC4  
CPSF1 TAF5  
RPL23 RIPK3  
SMAD2 ANAPC2  
COPS6 COPS5  
CBX5 INCENP  
PDLIM7 UBQLN4  
GMPS PRKAB1  
CD1E B2M  
TGM2 SMAD2  
DPM2 PIGA  
PARK2 HSPA4  
IFIT3 IFIT2  
SRSF11 SREBF2  
IFIT3 IFIT1  
AURKATLK1  
GNAI3 AGTR2  
NAA38 USP15  
CASP3 STK3  
FYN PTPRC  
TSG101 ACAD8  
PIK3CB PRKCE  
TP53I3 UBR1  
HSPA1B SUMO2  
PF4 CCL5  
PSMD7 ADRM1  
GLI3 SUFU  
RASA1 EPHB2  
SNAP23ITSN1  
DBN1 DNMBP  
LIG4 PNKP  
MAP3K3 LUC7L2  
USP19 FKBP8  
MSH6 ATR  
PTPRG PXN  
PRKCA EWSR1

ZNF225 CSNK2A1  
CLIP1 PAFAH1B1  
NFATC1 HDAC5  
CNTN2 NRCAM  
MMP3 SPOCK1  
IL13 IL13RA1  
PITPNAPMVK  
USF1 GTF2IRD1  
SMAD7 MYOD1  
EIF1AY EIF5  
RBL1 RBBP7  
RASA1 EPHA2  
PTPRC CSNK2A1  
MEF2D STAB1  
TCP1 IGBP1  
MTA2 MBD3L1  
NLGN3 NRXN3  
RELA ASCC3  
CD86 MARCH8  
MED15 MED19  
EVPL PSORS1C2  
PCNA CDK2  
EID2 HDAC2  
CCHCR1 TRAF4  
EIF1B RANBP1  
RB1 MAPK1  
SMAD2 LEF1  
SCTR CALM2  
BTK PIK3AP1  
MAP3K10 PCGF3  
PIP5K1A CAPS  
MSN HLA-C  
PTK2 TRIP6  
GRB2 MAP4K3  
LAPTM5 TOM1L2  
AP4M1 ARF1P1  
MAPK14 TCF20  
TCP1 TNFRSF1B  
CCNT1 GRN  
TTC13 RAPGEF2

SH2D1A ARHGEF7  
CCNT1 MEPCE  
YWHAZ PARD3  
TCP1 CCT3  
CCDC130 ZBTB16  
MGRN1UBE2J2  
TACR1 GPRASP1  
SAE1 ARX  
CTBP2 CTBP1  
ACVR2B INHBA  
WASF1 BAD  
HCFC1 ASF1B  
KIAA1967 RUVBL2  
GHSR GHRL  
RXRA MPG  
TXLNA STX4  
DYNLL1 SHANK2  
EMD SAP130  
PFN1 ACTB  
ACTN1 MYOT  
CCDC85B AKIRIN2  
YWHAZ CAND1  
YWHAZ PACS2  
HSPD1 CASP3  
SORBS3 ADAM15  
MAPK1 LIPE  
GIPC1 DDIT3  
CIAO1 DDX20  
CTSA GLB1  
SLC25A20 CRAMP1L  
LRP1 APBA2  
TONSL ASF1B  
ABCA1 PDLIM4  
RASA1 SHC1  
G3BP1 NUFIP2  
DEK SRSF2  
MAP4K4 KIF5A  
NAT1 NAA10  
DPYSL4 SH3GL3  
TP53 STK4

RAF1 PIN1  
HDAC3 PROX1  
E2F3 TFDP1  
HMGB1MECP2  
PCBD1 SEC62  
E2F3 TFDP2  
FLNA TJP1  
UBQLN1 FAM127A  
SPTBN2 CELSR3  
ADAP2 IKBKG  
MOBKL3 CCT7  
ABL1 EFNA5  
NOM1 PNKP  
HDAC3 CREBBP  
SYNJ1 CD2BP2  
NANOS3 IMMT  
TSSC1 QRICH2  
E2F3 FHL2  
NEDD8 USP25  
PPFIA4 GIT1  
YES1 DLG4  
CDH1 CASP8  
MALT1 TRAF6  
MAFG CHD3  
SUMO2 PLAUR  
HSPA1B YWHAG  
SPTAN1 TANC1  
PLG CDCP1  
APC LAMB3  
USP7 ACD  
ATG12 CDC37  
CBX5 CBX1  
ATG12 MRPL23  
GIPC1 COPB2  
MEP1A SRRM2  
TAF1 MEF2C  
PTPN2 STAT5B  
HLA-C PCBP1  
CSNK2B TOP2B  
TARS NDRG1

TMBIM4 EIF3L  
RARA PRKCA  
RAC1 CCDC104  
EXOC4 DTNBP1  
DLST TUBB2C  
HIST3H3 DYRK2  
TP53 GPS1  
YWHAB ISCU  
VCL ACTA1  
HTT CTBP1  
TRAPPC2 ZBED1  
MTHFS TSC22D4  
PSMF1 HOOK2  
HCFC1 THAP1  
PRPF3 RNPS1  
POLR1C PMS1  
STOM TRIP6  
MAP4K4 DOK1  
SMAD2 DCAF6  
MAGEA11 EWSR1  
ANXA2 PRKCA  
ADD2 RPH3A  
CASP9 RPS27A  
UBE2D2 RNF186  
PRKCA CREM  
RAB3GAP1 RAB3GAP2  
THRA NR0B2  
DSPP PKP3  
NUP93 C20ORF24  
CCNA2 CDKN1B  
STAT6 NCOA1  
FGFR1 IL17RD  
EHHADH TSG101  
NCAPH2 NCAPG2  
C1QA HRG  
MYC UBC  
AKT1 MAP3K11  
ATXN1L ATXN1  
HNRNPH1 SRRM2  
ARL4C UBQLN4

GATA1 FLI1  
IL1B ADRB2  
DAXX C3ORF63  
HEXIM1 EGFR  
SNAI1 QRICH2  
PAFAH1B2 ACIN1  
EGFR MAPK8IP1  
IGBP1 PHLDA3  
IL6ST STAT3  
YWHAB KIF23  
CDKN1B CCNA1  
TMED10 TRAF6  
EXOSC10 B9D1  
PTEN PRDX1  
RGS20 PMVK  
MSH6 TOPBP1  
RAB3B ACVR1  
TOB1 CNOT1  
CDKN1A HERC5  
APOB HSP90AA1  
MYOG NF1  
SMAD1 FBXO30  
AGTR1 GRK5  
PRKACA LIPE  
IFT20 C19ORF50  
RPS9 LYAR  
BMPR1A ZMYND11  
HIST1H3J GATAD2A  
EPB41 EIF1  
MED14 CDK8  
SCFD1 COG4  
THRA RGN  
CYTH3 GRASP  
F2 ITGA2B  
STAT3 STAT5A  
WDR77 CXXC1  
STAT3 STAT1  
STAT3 STAT6  
TRIM24RARA  
KRT18 CDK1



EPS15 RNF11  
FBXW11 NFKB2  
EGFR SH2B3  
MAPK8 HSF1  
SCNN1A UBE2I  
KAT5 TELO2  
AKAP7 USP4  
TRIM24AR  
CD3EAP XPA  
CD247 STAT5A  
EGFR CBL  
SPP1 ACP5  
ESR2 MED20  
PCNT TUBG1  
MRPS12 CRMP1  
ESR1 MVP  
UBE2M CUL1  
CTNNBIP1 PNMA2  
SERPINA1 RAP2A  
TCEB2 ASB4  
YWHAQ ARHGEF2  
AKT1 PKN2  
ACTN1 CDK5  
USP1 DSC1  
CDK1 MYT1  
CEP110 MPZ  
EIF1B OAT  
PRKCQ HABP4  
PRL UBQLN4  
TSC22D1 DDB1  
HUS1 ATR  
PES1 ARRB1  
GRINL1A THAP1  
LASS2 C20ORF24  
EIF1B SOD2  
GTF2F2 POLR2C  
PPP5C DISC1  
TPM3 EIF4A2  
PHLPP1 RPS27A  
GTF2F2 POLR2E

MAGEB2 ANAPC2  
SMAD1 RHEBL1  
AKT1 CDC37  
NR0B1 SNW1  
AKT1 MAPK14  
HDAC1 HDAC7  
SH3GL3 FAM173A  
POLG POLG2  
BTG2 CNOT8  
HUS1 HDAC1  
PSMD13 UCHL5  
UBE2N RNF11  
CSNK2B MEPCE  
PSMD14 USP14  
SH2D1B CD244  
SH3BP5BTK  
HDAC3 TMPO  
SUMO2 TEX10  
MAPK1 HDAC4  
NAA38 KCTD3  
GAPDH PSEN1  
TNPO2 NUP98  
NFKBIE REL  
INS MLL  
YWHAZ FOXO4  
MEPCE ANP32E  
YWHAZ SYN2  
EREG EGFR  
HIP1 IFT57  
UBC UBQLN1  
MYT1 PIN1  
GAPDH MCL1  
COPA BET1L  
NAA38 LSM5  
MED27 MED8  
CCNDBP1 SIRT6  
ACTG1 CAP1  
KNG1 ITGB2  
APOH GEM  
CDK2 RBL2

SUMO1 PIAS4  
GSK3A KRBA1  
YWHAQ BAD  
BRE UGGT2  
FPR1 ACTG1  
TRAF1 USP7  
IL16 USHBP1  
CASK KCNA4  
TCOF1 GPN1  
PTPN6 IL6ST  
LOXL1 FBLN5  
C14ORF135 FBP1  
EPS15 MOBKL3  
YWHAG SPTBN1  
NAA38 LSM4  
NKX2-1NCOA2  
TBP TCF12  
UBE2V2 MOBKL3  
CUL4B DDA1  
ZP2 ZPBP  
DFFA YWHAQ  
EGFR CAMK2A  
RBX1 FBXO33  
TRIP13 ARL11  
C5 CPB2  
GABARAP TBC1D2B  
TAF6 HDAC1  
CDKN2A MDM2  
HNRNPUL1 LYAR  
VTN GEM  
SOS2 CD2AP  
UBC ADRBK1  
SGK1 NEK6  
CD40 MAP3K8  
SORBS2 ADAM15  
NR4A1 VPRBP  
PFDN1 ACTB  
ORC5 ORC4  
CCDC33 TRAF2  
PTPRF BCAR1

CASP4 MDN1  
MYT1 HDAC1  
LAT2 UBQLN4  
STAM2 UBE2D1  
MAP1LC3C ATG3  
CRTC3 WNK1  
TBC1D4 C3ORF63  
DDX5 GSK3B  
TUBB TRADD  
DDX58 IRF3  
TXN TSSC1  
PRPF3 SF3A2  
CDC73 CPSF3  
PSMD4 UBQLN4  
CRK ERBB4  
ABL1 DUSP15  
SIX3 TLE3  
BCL2 SERPINB8  
UNC119 RGL2  
RGS2 CALM2  
WBP4 EFTUD2  
SIX3 TLE1  
HDAC1 RAD9A  
IPO5 BAP1  
SMAD4 NEK6  
ADRB2 AKAP12  
TUBB POLQ  
EPB41 LRRC59  
PRKRA TP53  
UBE2E1 RNF152  
NRIP1 PRMT1  
FOXP1 SMAD4  
MMP12 PLAUR  
EEF1A1 TAF9  
CASP9 BCL2L1  
STOM ACCN2  
LTA4H HLA-C  
EGFR CAV2  
HDAC1 PHB2  
ATP5J2 ATG5

PRPF3 SRRM1  
NR3C1 RPS27A  
NPHP1 PAK2  
CLNS1A G3BP1  
IKBKB MARK3  
RELA TWIST1  
HGS DAZAP2  
GNAI2 F2R  
MYD88 PELI2  
PML BCL6  
CDC37 EIF2AK1  
YWHAZ CLTC  
SLC38A1 LUC7L2  
PLK4 CENPJ  
UQCRC2 HLA-B  
TAF13 TAF2  
EIF2B1 STK11  
DNAJA1 SUMO4  
IRS4 PIK3CA  
TNFRSF1B KCTD12  
EEF1A1 MAPK14  
IFNA8 IFNAR2  
RNF8 UBE2N  
NTRK1 PHLDA3  
ZNF217 HDAC2  
NAP1L1 IKBKE  
YWHAZ TLK2  
OTUD7B HIF1AN  
NUBP1 NDN  
F10 PRKAB1  
HTRA2 BIRC7  
HGS ARL6IP1  
AP1G2 RABEP1  
PRPF40A ZCCHC8  
PTHLH PTH1R  
ERBB2 ELF3  
HLA-B PA2G4  
DIS3L2 FEZ1  
NR1H2 NCOR2  
APP GTF2F2

DEPDC1B CAND1  
TBP TBPL1  
CHURC1 SERTAD1  
NRP1 PLXNA1  
HEATR2 PNKP  
COPB2 TNIK  
STK11 PARD3  
UBE2U MIB2  
MED14 GRB2  
CASP4 SMC4  
UBE2D2 RLIM  
PRPF40A CYFIP2  
THBS1 TFPI  
GNAI2 EDNRA  
HGS OSBPL5  
SPG20 ITCH  
TUBB NFKBIB  
CUL4A PHIP  
PRDX4 TTF2  
PSMD4 CUL1  
PSMF1 HOOK2  
BMPR2 ACTR8  
SSR1 EEF1A1  
ARNTL HIF1A  
TIPRL PPP4R2  
TGFB1I1 GIT1  
XIAP UBE2Q2  
AP1G2 AP1S1  
LZTR1 RUVBL1  
TRAF2 RALBP1  
YES1 DOK1  
CCNA2 RPS27A  
EED ITGAE  
MEF2D RAB1B  
ZNF496 ZSCAN30  
CASP3 TRAF1  
MVK EWSR1  
HDAC1 PITX2  
SNUPN KIAA1107  
PLCG2 BLK

FKBP4 SH3BP4  
NUP155 HLA-B  
STK16 KCTD17  
CCL18 CRMP1  
TRAF2 MUM1  
SLC38A1 MED31  
PIK3R1 FLNC  
GNB2 ATXN10  
HDAC1 GF11  
YWHAZ NOXA1  
PBLD STRAP  
YES1 PDCD6IP  
PRPF6 SNRPB  
LIN28B USP36  
XRCC6 COIL  
FADD MOBKL3  
SLX4 PGAM5  
LZTR1 TCF19  
ABL1 UHMK1  
PRSS23 MAPK8IP2  
SYT2 STON2  
YWHAE MAP3K2  
CFL1 TAGLN  
RPA1 TCEA2  
NUAK1 LATS1  
RUNX1 YAP1  
GABARAP HDAC5  
RELA NFKBIB  
RELA TRIP4  
EEF1A1 CSRP2  
BUB1B MAP3K4  
RAB2A CBFβ  
TIAM1 MAPK8IP2  
HOXA5 GTF2A1L  
TSEN2 CLP1  
APC SNW1  
LAPTM5 HEY1  
BCOR HDAC6  
SNRNP200 SNRPB  
TRAF2 ZMYND11

FBL NOP2  
A2M ADAM19  
UBC TRAF2  
GBAS KEAP1  
SURF2 WDR20  
HLA-B SMC3  
DDX24 NRXN2  
SRC PRKCD  
HNRNPU IKBKG  
ABL1 RIN3  
ARF6 SERBP1  
STAT1 GTF2I  
CASP3 STK4  
CHD8 ASH2L  
EGFR MATR3  
FERMT2 FBLIM1  
TGFB1 TGFBRAP1  
SMC2 HLA-A  
BUB3 USP11  
ASAP2 PXN  
F13A1 HSPB1  
STAT1 IGBP1  
ZFP36L1 MAPK14  
EPRS YWHAZ  
NFATC1 FOXP3  
MED24 HNF4A  
EGF ERBB2  
HSPA4 OLR1  
DAND5 SP4  
DAND5 SP3  
MMP13 MMP14  
SUMO1 DAXX  
CDR2 PKN1  
SQSTM1 CASP8  
KCTD12 ATG5  
AKAP5 PPP3CA  
KIF22 PJA1  
ACCN2 ACCN1  
RBM5 SF3A2  
SERPINA3 CTRC



EGFR STAT5B  
CLPB TTF2  
TSG101 VPS28  
STRN CCT8  
STRN CCT4  
RAD51L1 RAD51  
SPG21 TRAF2  
BCL2 CPT1A  
OXT MLL  
YES1 MST1R  
SH3GL1 SH3GL3  
DENR UBC  
NPHS1 NPHS2  
SDCCAG3 GIT1  
PTPRC EPOR  
CDON BOC  
PIAS1 PGR  
IRS1 ATP2A3  
PRKCA GABRR2  
PF4 VCAN  
PRKCA GABRB3  
REV3L PMS1  
KCTD17 LNX1  
APC ASB7  
CREB1 ZNF436  
DDX5 IPO11  
HIST1H3J RCOR1  
FLNB APC  
RAD21 DISC1  
UBC RING1  
USP4 LSM7  
WBP4 KHDRBS1  
SFN GAN  
GRWD1CDT1  
GTF3C1EZH2  
TRAF2 RHEB  
ASXL2 TRAF6  
GEMIN4 SNRPD2  
RUNX1T1 NECAB2  
MT2A SRC

VCP TRAF6  
CST1 SOD2  
YOD1 MUTED  
SIM2 ARIH1  
DHX15 TOPORS  
REM1 YWHAQ  
PRKCB COPS5  
LEPR DGKZ  
WASF1 ARHGEF2  
GRINL1A SCMH1  
RPA2 KIAA1377  
CALCOCO2 PTBP2  
MMP2 TIMP4  
CBX4 KDM5B  
GNB2L1 TP63  
GRB2 RP1L1  
PDE6G FNBP1  
NPM1 CDKN2A  
PIK3R1 PTK2B  
YY1 HDAC2  
RPN2 NDRG1  
GBAS WARS  
BAG2 TRAF6  
PFN2 RNF146  
MED13 MED23  
CCND2 NPDC1  
ACTR1A HDAC6  
ITCH RNF11  
ARHGAP1 RHOC  
TP53 ANKRD2  
SUPT3H DDB2  
TRAF2 DLGAP5  
CDH5 PARD3  
DHX16 COIL  
EZH2 WSB2  
GRIN2D PPP2R1A  
CHAF1A PCBD2  
AKT1 METTL1  
SYT5 SYT3  
CDH1 CBLL1

AR AHR  
ERBB2 ITK  
GAPDH TNFRSF1B  
HGF HGFAC  
LEPR SNX1  
PLD2 PLCG1  
MBP MAPK1  
PCNA WRN  
ITGAV NOV  
LAMC1 NID2  
CRKL DOCK2  
RXRA NR1H3  
RALYL EWSR1  
RASSF1 DAXX  
GEMIN4 SNRPD1  
NUP93 TMEM48  
PTN GIPC2  
CHD4 SMARCE1  
YWHAE FAN1  
ATXN1 FAM48A  
PIAS2 ESR2  
ATF7IP MRI1  
IKBKB FOXO3  
PSMC4 PAAF1  
RAG1 RAG2  
FYN PRKCE  
NFKB1B POLR1B  
HNRNPL SUMO4  
MYH7 PSMD4  
DDX58 UBE2K  
INSR PTPRK  
SOCS6 IRS4  
DEFB1 INSL6  
CDC37 ECSIT  
ARL6IP1 INPP5K  
MET PTPN11  
DDX20 HDAC5  
SMAD5 VPS24  
DAND5 SMARCC1  
LZTR1 ZBTB1

KPNA3 RCC1  
UBE2U RNF25  
PAK1 FRS2  
YWHAZ PABPN1  
TRAP1 TLR6  
CD247 SHC1  
SLC25A37 EWSR1  
CD247 PTPN6  
PVR AP1M2  
AIRE PRKDC  
TSG101 GGA1  
PRNP ABT1  
SEC11ATNFRSF14  
LTA4H HLA-B  
LCK SH3BP2  
ACTG1 EPS8L2  
UBE2M NAE1  
UBE2V2 TRAF6  
CCNK CEP76  
CXCR2 RAB11FIP2  
LUC7L2 CCDC53  
TUSC2 SGOL2  
CALM2 MAP3K1  
ACTB EPB49  
DAND5 GATA6  
UBC ABCG2  
AURKBSEPT1  
HSP90AA1 DARS  
RRP8 USP39  
PTPN6 FLT3  
LINGO1 RTN4R  
MMP2 THBS2  
HIST1H4I YWHAZ  
MLLT4 SMAD2  
MAP3K12 FRA10AC1  
MAP1B ATG10  
CD40 PIK3R1  
FGFR2 STAT5A  
EZR HLA-B  
TERT XRCC5

ZDHHC2 MAFB  
GNB2L1 DNM1  
PSMD13 TRAF6  
NCAN TNC  
RAE1 COPS6  
CSNK2A1 MEF2C  
RPL13 TBK1  
RPS9 DDX56  
PCNA IKBKE  
REM1 CACNB1  
SP100 SUMO2  
XRCC6 SMPD3  
DDX58 UBE2D3  
FANCA FANCC  
SUMO1 NIN  
MDFI ZNF707  
COL1A1 PAK1  
CSDE1 HNRNPD  
FCHSD2 CHKA  
APTX CALCOCO1  
MX1 BLM  
IRS1 RPS27A  
TWIST1KAT2B  
IRS1 GRB2  
PHLPP2WDR48  
YEATS4 ING3  
EXOC8 USHBP1  
MAPT CALM2  
EIF4E2 USP4  
HERPUD1 TOLLIP  
TCEANC TRAF2  
GRB2 LAX1  
TCEA1 CTDP1  
ARID1A SMARCA4  
ARIH2 DLST  
PAK1 ATG5  
ARID1A SMARCA2  
PSEN1 VASN  
ARNTL AHR  
APPBP2CHMP5

PLAT SERPINA5  
ERP29 IKBKE  
PLAT SERPING1  
DEDD GTF3C3  
IFNG IFNGR2  
JAK1 CCR1  
A2M RNF32  
IGF1R DOK5  
CSNK2A2 WDR48  
SNCA EPB49  
MYH9 MYL9  
MEPCE DDX23  
SEC23ANDRG1  
TNFRSF8 TNFSF8  
DNMT1 DPEP2  
EEF1A1 RNF10  
HLA-B RPA3  
DNMT1 DNMT3B  
RNF10 CCDC90B  
UBE2E1 DTX3  
SUMO1 HIF1A  
TFPI PRSS3  
FGG ITGAM  
LEPR PIN1  
CUL4A DDB1  
ATRX RAD51  
IFNA5 IFNAR2  
PRKACA GAD2  
TNF NT5DC3  
HRAS RIN1  
TAF1 TAF6  
AGRN ATN1  
GABBR2 LASS2  
ERCC1 XPA  
RNPS1 PNN  
DEC1 SETDB1  
APBB1 RBM17  
CD99 SDCCAG3  
TNNI3 ACTA1  
PIK3R1 BCAR1

TAF1 TAF11  
TAF1 TAF13  
TAF1 TAF7  
PRKCI MAP1LC3B  
ATF7IP CEP250  
FBL MAP3K14  
TAF1 TAF5  
S100B S100A11  
GPR17 GNA13  
KIAA1409 SAE1  
LMO1 TAL2  
RAB25 ACVR1  
ABL1 C6  
CYP2C9 POR  
YY1 CREBBP  
SMARCC1 ING1  
MTNR1A GNAI1  
TEK PTPN12  
TTYH2 IKBKG  
CD22 GRB2  
TPM3 IKBKE  
TBL1X NCOR2  
RAB3GAP1 MAP1LC3A  
APP HADHB  
PLAT SERPINE1  
FBLN1 MOBKL3  
RPS27A POLQ  
CST6 CTSL1  
A2M LONP1  
TRIM28 SIN3A  
CANX BCAP31  
CSDE1 HLA-B  
USH1G USH1C  
ARPC2 SF3B2  
EWSR1 BNIP3L  
PPIB STAT5A  
AP2A1 SHC1  
ASGR1 HSP90B1  
ME2 DYNLL1  
F2RL2 PLCG1

ACTA1 CYTH1  
MMP1 ACAN  
MFNG JAG1  
STAT5A PRTFDC1  
SLC38A1 TSC22D4  
HEATR3 TRAF6  
ZBTB16QTRT1  
TDP2 FLI1  
HSPA2 HSPBP1  
BRAF RAP1A  
LYN CSF2RA  
JAK2 RAF1  
ZYG ZNF384  
HNRNPL CSE1L  
TRIM28ZNF382  
TCF4 TCF3  
GNB2L1 SREK1  
MTA2 GATAD2B  
TRIM24ESR1  
ACTA1 AFAP1  
PABPC1 CNOT7  
MCC PTGES3  
PSMB3 POMP  
MTNR1A RAC1  
LSM1 LSM3  
NAP1L1 TANK  
CDKN1A MAPK8  
FZD9 MDFI  
LSM1 LSM6  
NAPA VAMP2  
SUMO2 SETDB1  
MSX1 PAX9  
KIAA1267 TRAF3IP1  
PPL VIM  
C1QA C1S  
CFLAR RPS27A  
ACTA1 DHX9  
MTOR RICTOR  
PRMT5 MEF2D  
ICAM1 IL2RG



MAPK14 STK39  
EXOSC10 UPF2  
ABL1 CHR1  
CCR5 STAT5B  
TBP YWHAE  
ALB YWHAG  
APOA1 MAP7D1  
C1QBP FBXO33  
MRPL32 TNIK  
SH3BGRL EGFR  
NTRK1 TRAF6  
TTI1 ATM  
TUBB2A LAMA4  
NUPR1 EP300  
SREBF2OSTF1  
LAMB1 ACHE  
FDPS EIF4ENIF1  
HIST3H3 EHMT2  
RDBP WDR48  
SREBF2ARHGEF1  
TNF ADAM17  
PCBP1 RBM42  
EIF4G2 GSTK1  
HSPA1B PTGES3  
PRSS23 EFNA3  
TNFAIP3 MCM6  
ADRBK1 CCR5  
UBQLN4 RAI2  
DOCK1 CEBPE  
KIAA0090 CENPH  
YWHAE FAM65B  
BAG2 NFKB1B  
INADL ACCN3  
TJP1 PTPN14  
SACS ZNRD1  
INA TANC1  
TRAF2 TRADD  
EGFR PRKAR1B  
ADRBK1 CCR4  
SUPT5H C9ORF78

ETFA MPG  
MPHOSPH9 WNK1  
ZIC2 PRKDC  
EIF4B CASP3  
RECQL5 CUX1  
FIBP RNF32  
YWHAB DOCK4  
YWHAB TESK2  
TOB1 RAVER1  
WWC3 PHLDA3  
TPD52L2 MAL2  
CRY1 TIMELESS  
SNCA SEPT2  
GNAS RUVBL1  
XRCC6 TERF2IP  
KCNA10 POMP  
ESR1 RLIM  
RRAGBRRAGC  
MAP1LC3C RASSF1  
UBE2K DTX3  
ELF1 REL  
HIST1H3J TP53BP1  
ESR1 RBM39  
USP4 DCP1B  
ADCY3 STOML3  
CEBPD SMAD3  
CNKSR1 RASSF1  
GSR RB1  
ORC5 DBF4  
RPS27AATF5  
CAPN3 TTN  
PGRMC1 MPG  
GRB2 SMARCD3  
RAB4A SRA1  
IL4R PRKCZ  
TMED10 TMED2  
COLEC11 GOLM1  
RPS27ADLGAP5  
EWSR1 MTMR9  
CHAD COL2A1

GPRASP1 TFG  
SF3A2 WBP11  
KCNN4 PHPT1  
ARNT PML  
UBE2E1 ARRDC1  
TEX11 C10ORF82  
SRSF3 EXOSC6  
NCOR1 ZMYND11  
PRICKLE3 GRB2  
POMC MC4R  
ARF3 KIF23  
RCOR1 NR2E1  
GNAI2 CXCR2  
GNAI2 CXCR1  
FBL BAK1  
IMMT DISC1  
GTF2B TAF9  
PTK2 PTPRH  
MATR3 GF11B  
SF3A2 ELAVL1  
GATA2 LMO2  
NDC80 ZW10  
SAP30 PCBD1  
CUL2 CMBL  
HIST1H3J CHD3  
EPB41 PCNA  
UBOX5 UBE2D3  
MAP3K14 TRAF6  
CDH3 CD2AP  
IGF1 IGFBP2  
MAP3K11 KIFAP3  
SUMO3 ARX  
POLD2 LSM6  
A2M MYOC  
LYN PRAM1  
SPINT2 ITIH2  
ZBTB7A HDAC1  
UBOX5 UBE2K  
FLNC MYOT  
BTG3 CNOT7

MED22 MED11  
PTH1R YWHAH  
NR2F6 NCOA1  
ADAM12 IGFBP3  
LIMS1 EHMT2  
SGTA C1QTNF1  
RPS27ADLGAP4  
WWC1 DLC1  
UBE2E1 RNF10  
STIP1 CDC37  
CDK2 PPP2CA  
CCNE1 CALM2  
MAP3K7 MAP3K5  
MARS TRAF6  
PRKCZ PARD3  
PTP4A3 PRPSAP1  
NCL NSUN2  
KIF5C YWHAG  
C10ORF62 KRTAP4-12  
FASLG GRB2  
SSB IKBKE  
STX7 STX8  
LXN THRAP3  
RXRA PML  
CEACAM5 EWSR1  
MCM7 CDKN1C  
PRKCG EIF4E  
GNPDA1 EWSR1  
NR0B2 NR1I3  
JAK2 PDGFRB  
MYD88 IRAK3  
EEF1D KTN1  
IFIT3 IFIT1  
SMAD2 RNF123  
CALCOCO2 POLI  
ATL1 RTN4  
TFDP2 E2F4  
PHB BRE  
MCM7 NEK6  
UBE2W RNF2

UBQLN4 FKBP7  
ZBTB16TXNIP  
FER DNMT3  
WDR62 TBP  
TSEN2 TSEN34  
GUCA1A GUCY2D  
RPS6KA3 CSNK2B  
RARA GATA2  
HIST1H3J BPTF  
IDH3B PHLDA3  
APC OS9  
CEP63 MBIP  
VRK1 PLK3  
LAPTM5 EPN1  
BLM EXO1  
NCK2 FGFR1  
MC2R MRAP  
EWSR1 RBPMS  
DNM1 PACSIN1  
PPIL4 SMAD5  
MED26 MED9  
HGS GF11B  
WDR5 SNRNP40  
GLRX3 IKBKE  
RPL7 SGOL1  
EGFR HSP90B1  
RPS3 RPS27A  
CD46 MSN  
MAP3K10 BEND5  
RXRB EIF3A  
BAG4 BCL2  
C20ORF24 ATXN10  
SCNN1A STX1A  
GNB5 MCM2  
PRKCD EHD2  
SNRPB2 DHX9  
GRB2 ASXL1  
S100A8 LRRK1  
UBC ITCH  
NCOR1 SF3B3

S100A6 ANXA11  
KIN RPA1  
ORC5 CDC5L  
KRAS CALM2  
UBE2I BLMH  
PLEKHA5 PLDN  
GH1 SET  
MICAL1 RAB1B  
COL5A2 COL11A1  
HNRNPL PJA1  
TERF2 ORC3  
MAX GOLGA2  
ZBTB16CCDC85B  
RPS27AFAN1  
PTEN COPS6  
RPS27AERBB4  
SPRR2A EVPL  
ITGA5 COL18A1  
HDAC1 MNT  
POLE2 EEF1A1  
HBP1 RB1  
PPP2R3A CDC6  
FASLG RPS27A  
MAPK1 PRKCD  
PRNP SRRM2  
RNF125 UBE2E2  
MLLT4 F11R  
PTK2 CDH10  
CD34 CRKL  
RHOG MAP3K11  
PTK2 NEDD8  
DYNLL1 NEK6  
FBXO22 COPS5  
MST1R STUB1  
ZBTB16FAM101B  
MYD88 LRRFIP2  
RAF1 MAP3K1  
ARL6IP5 MEF2A  
PFN1 VIPR1  
ABCA1 PRKACA

EIF3H CSNK2A2  
GCC2 ZRANB1  
LIMK2 CDC42BPA  
SMURF1 NDFIP2  
PINX1 GTPBP4  
RHO PRKCA  
LZTR1 MED16  
APOA1 CD40LG  
TIMM10 TIMM9  
TBC1D4 DNPEP  
SLC22A6 APPBP2  
MCC MOBKL3  
SAP18 NSF  
EIF3F MCC  
F8 HSPA5  
ACTA1 MYLK  
SOCS1 TCEB1  
PIK3R1 MAP4K1  
TSHR LHCGR  
YY1 HDAC1  
XRCC6 FCHSD1  
TBC1D4 ZMIZ1  
PGR HMGB1  
PSMA3 XRN2  
HSP90AA1 RIPK3  
GIGYF2U2AF1L4  
ZBTB7A TP53  
MCC REXO2  
PABPC1 ETF1  
FGB FBLN1  
ARF6 CCDC47  
SKI SIN3A  
HRAS RAPGEF1  
MLLT6 CEBPE  
MCC SEPT2  
INPPL1 SRC  
CTSB SPHK1  
TAF9 TRRAP  
MAPK3 STAT5A  
YY1 KAT2B

LYN ACTB  
LAG3 CENPJ  
COPB1 ADAM19  
NUP85 USP36  
EFNA4 EPHA5  
CDH1 NEDD9  
MCC MRPS16  
HOXB6 ALX4  
SOX9 CREBBP  
MALT1 IKBKG  
XPO1 PKIA  
LMNB1 PRPH  
ATXN3 EWSR1  
GRIN2D HRAS  
NCALDTUBA4A  
MCC PSMD6  
EFNA4 EPHA4  
HSPA9 IKBKE  
TGM2 PLCD1  
IGF2 IGFBP5  
LSP1 MAPKAPK2  
IGF2 IGFBP6  
PRKCA DGKD  
KDM6APAXIP1  
MCC TALDO1  
YWHAZ PHLDB2  
MAP2 CPEB1  
HMGA2CSNK2A1  
PRKCB STXBP1  
SUV39H1 MECOM  
PQBP1 RCVRN  
FCER1G BTK  
VIM SMAD3  
EPCAMCD83  
ZBTB16CIDEA  
PTPRC PXN  
MUC1 APC  
RALYL TSNAX  
MYO1CPOLR1E  
WDR36 USP36



EFNA3 EPHA7  
HIST1H2AL YWHAZ  
HSP90AA1 TRADD  
FYN VPS13A  
XRCC6 CHD1L  
PPL EVPL  
E2F4 MGA  
ATAT1 SETDB1  
KCNAB1 SLC39A1  
TGFB1 BMPR2  
SYNCRIP CNBP  
INADL GLS2  
UNC119 CBX8  
CYFIP2 ABI3  
CSNK2A2 RNPS1  
TMCC2 PRKCZ  
TNFRSF1B COPB1  
CCT4 YWHAZ  
ZNF205 MDFI  
HBXIP GIT1  
STK4 HIST2H2BE  
SUMO3 SAE1  
MCC TAGLN2  
CCT3 CTTNBP2  
PSMC4 PSMD13  
LCK PRKCA  
SLIT2 ROBO1  
RAMP1 CALCA  
NFATC2 MED31  
SLC24A1 ABL1  
MCC EIF4H  
MYC ESR1  
SEPHS1 IGSF21  
TIPRL PPP4C  
SMAD1 ECSIT  
ATP5D ATG5  
MAP3K7 MAP3K3  
SMC2 HLA-B  
ARL2 PPP2CA  
PCBP1 HNRPLL

SOCS1 TCEB2  
ACTL6B CTBP1  
ID3 E2F4  
PSEN1 PKP4  
SMAD2 GTF2IRD1  
MBP STK4  
PLEKHA7 KIFC3  
TP53BP2 YAP1  
SMARCB1 ARID2  
FCGR3B APCS  
STMN1 UHMK1  
KIF11 MYSM1  
TP73 INPP5E  
IER3 PPP2R5C  
AURKAKIF2C  
FHL1 PRKAB1  
ADRA1D ADRA1A  
SNRPB MEPCE  
TFG TSSK2  
ETV6 KAT5  
SERPINA3 F5  
PAK1 BAIAP2  
AKT1 PRKCQ  
YWHAE AKAP13  
HGF SDC1  
RPN1 USP49  
HLA-C GMPS  
PIK3R1 DLX4  
ALDOC ATP6V1E1  
YWHAE KCNH2  
LCK PTPRH  
FST DIP2A  
STK25 STRN4  
MAP3K3 TRAF6  
XRCC6 NIT1  
DDB1 DCAF12  
DLG1 CAMK2A  
STAT6 NCOA2  
IQGAP1NFKBIB  
ITCH TRPC4

GORASP1 HIPK3  
TRIM37DLGAP5  
GF11 PIAS3  
TEX10 USP42  
SUMO1 WDR69  
RPS29 EXT2  
PAK7 PDLIM7  
DDX5 SRRM1  
PTPRA BCAR1  
MSLN MUC16  
ABCF1 PINX1  
SYT1 IKBKG  
DLL1 NOTCH3  
ATP5C1PJA1  
TP53 GPS2  
HSP90AA1 NFKBIB  
YWHAZ GIGYF2  
TMCC2 PTOV1  
SERPINA3 APP  
FLNA CAV1  
PSMC2 PAAF1  
HSPA5 GRIA1  
HRAS RASGRF1  
NCAM1GFRA1  
YWHAE CBY1  
SUMO2 PAFAH1B3  
LRPPRC MAP1S  
BCR SRC  
SUPT5H PHYHIP  
AKT2 CASP3  
MED24 PARP1  
MYST3 RERE  
GTF2F1 FEZ1  
BAX BCL2A1  
SPTA1 EVL  
PARP1 NCL  
CEP63 DISC1  
STXBP1 SYTL4  
HIST3H3 KAT2B  
CXORF56 NFKBIL1

ABCB1 DHX9  
DIAPH1CENPA  
SRGAP1 ROBO1  
FADD RIPK3  
FGF10 FGFR2  
MED27 MED30  
APP LAMA1  
TSC22D1 NDUFA9  
MED22 MED1  
C1ORF94 MAPK11P1L  
HOXB6 CREBBP  
EPS15 ITSN1  
AHR NCOA7  
ZZZ3 LZTR1  
FUS OTUB1  
ARPC4 ACTR3  
ROCK1 ARHGAP24  
YWHAG TUBA1A  
PRKCA FLNC  
SDCBP SDC1  
YWHAQ ESR2  
ESR1 ARNT  
BNIP3L DOK5  
HIST1H3J MBD1  
KDM6ARBBP5  
NR4A1 NCOA3  
MID1 MID1IP1  
GIPC1 DRD3  
HSPA1L RELA  
SUPT3H MYC  
RNF8 H2AFX  
PIK3CDRALY  
BRCA1 VCP  
EIF1B TPM3  
SREBF2COPS5  
USP49 SLC39A7  
ARPC4 ACTR2  
UBE2D2 RNF165  
MAP3K7 ENO1  
SDCBP GRIK1

MAP2 PAFAH1B1  
PRKAR1A PAM  
PRKAR1A CDH2  
STK4 RASSF3  
BLK UBE3A  
UNC13B SNAP25  
CDKN2A ANKRD12  
MARS PRKAB1  
RPS6KB1 CDC42  
HMGCS1 IKBKE  
MBP ATXN1  
MBP ATN1  
RARA HMGA1  
EIF1B CALR  
RPS6KB1 ACTA1  
MYH9 TUFM  
FOXG1 HDAC1  
PLXNB1 SEMA4A  
RB1 AHR  
MAP1B GAN  
KRTAP4-12 SPG7  
GSTM3 HLA-C  
YWHAB SRPK1  
LETM1 RAPGEF2  
NEFL CDK5RAP2  
EIF2AK2 METAP2  
TCERG1 SETDB1  
SKI SKIL  
ATP5F1 DSTYK  
ZNF365 NDE1  
SF3A2 SF1  
FGF6 FGFR3  
MAP3K11 MAP4K1  
KDM1AWHSC1  
BAG2 MLF2  
PRKAR1A PRKX  
IL2RB STAT5B  
EPB41L2 NR3C1  
HSP90AA1 IKBKG  
SLC12A1 STK39

ZBTB6 NCOR2  
CRX IPO13  
SMAD1 SNIP1  
UBE2E1 RNF220  
GNAZ EYA1  
HLA-C HSPA5  
NCOR1 SAFB  
CD36 HSD11B1  
FHL3 PHC2  
GAPDHPAFAH1B3  
GPRASP1 PBK  
TICAM1 RIPK3  
TERF1 ORC2  
KIT SRC  
PRPF40A SF3B2  
PAFAH1B3 SUMO4  
MAPRE1 HDAC6  
RAB1A INPP5F  
MAX PPP1CA  
LRRN1 MDFI  
EFEMP2 NANOS3  
EIF3E COPS6  
CREBBP CALCOCO1  
SEMA4A PLXND1  
CUL5 RNF7  
PIK3C2B GRB2  
ATRX FAM190B  
RASA1 DLC1  
PRKAR2B RYR2  
GH1 DDX21  
RCHY1 UBE2D4  
EPOR RPS27A  
PRKAR1A RFC2  
ABL2 ABI1  
BMP2 CHRDL2  
HLA-B COPS3  
RRAS PIK3R1  
MED20 PPARGC1A  
CYP27B1 TCF3  
PSAP GHR

AKT1 MST1R  
NCOR1 NR6A1  
PELO FANCI  
MAX PPP1CB  
AP2A2 HTT  
DNAJB8 HDAC6  
NCOA1 KANK2  
MTNR1A GPR50  
EEF1A1UBQLN4  
ZRANB2 SNRNP70  
EPOR GRB2  
GRM1 ITPR1  
TOP2A SETMAR  
RPS27ARNF11  
EPS15 NUMB  
SGK1 MAPT  
HLA-B DUSP3  
NCOR1 SF3A1  
SFN OSBPL3  
ESR1 MAPK3  
SMAD9 RNF123  
ACVR2A ACVR1B  
ULK2 RB1CC1  
PTPN2 SHC1  
EIF3H DISC1  
MCC ATP6V1E1  
YY1 ACTR8  
MBP RXRB  
RPS27AFIS1  
RHPN2 TNFRSF10D  
PAK1 RHOJ  
RANBP9 DDX4  
PRKCG GABRA1  
KCNJ4 LIN7B  
ESR1 YWHAQ  
ZNF202 PCBD1  
YWHAB EPB41L1  
MAPK3 GAB2  
UTP14A CCDC106  
BBS7 EXOC7

ERBB2 SH3BP2  
MED12 LYST  
WBP4 NONO  
ASB6 RNF7  
DFFA STRN4  
MED29 MED19  
PTPRB F11R  
LAPTM5 RNF168  
SHC1 KIAA1737  
TSPAN15 BTRC  
NR4A1 PSMC5  
C20ORF94 SYNE2  
EP300 E2F5  
AKT1 EZH2  
EEF1A1LAMA4  
CYLD MYO6  
WAS GRB2  
HLA-B GDI1  
PRKCA SPAG1  
CUL1 FBXO7  
ACTG1 MEPCE  
P4HB PAK2  
HNF4A MECR  
NR4A1 VASP  
MECP2 GTF2B  
ITSN2 KIAA1549  
TH CAMK2G  
COPS6 ZYG11B  
MYC CDKN2A  
RGS10 GNAO1  
ITGB5 ITGB3BP  
STRN CAV1  
PRDX1 IRF3  
RET GDNF  
ZBTB17ESR2  
HEXDC FBXL15  
MED25 MED4  
DDX21 TRAF6  
GNRH2 GNRHR2  
OTUD4 PARP11



SMAD7 SMAD2  
MAPRE1 COPS7A  
NUP107KPNB1  
POLR1C NFKBIB  
SLC25A6 FGFR3  
PRMT5 HSP90AA1  
THRA RXRA  
DAB2 DIP2A  
GRB2 TCEAL8  
PRMT3 PABPN1  
RBMX LNX1  
CD40 CALR  
YY1 SMAD4  
USF1 TCFL5  
GLP1R RPS27A  
UBE2E2 HERC5  
VDAC1 SUMO4  
MAP1B MAP1LC3A  
NR3C1 SFPQ  
ERBB2 DLG4  
MAP3K7 MAP3K14  
AMPH CDK5R1  
MMP2 TIMP3  
SUMO2 MDN1  
ATN1 MYST3  
PIK3R1 DAG1  
AKT1 MAPKAP1  
CCNB2 TSPYL2  
EPHA8 EFNA5  
DYNLL1 MYO10  
RAF1 MAPK1  
ARAF YWHAE  
LZTR1 ZNF175  
LAMC1 NID1  
GAS7 ABI1  
STON2 EPS15L1  
ITSN1 MRPL20  
FAM101B KAT5  
RAF1 GRB10  
HIST1H3J BAZ1B

KCTD17 TUBGCP4  
S100A1 CAPZA1  
IKBKB CTNNB1  
UBE2NL MEPCE  
RNASEH2A C19ORF68  
CDK5 CDK5RAP1  
MAPK1 MAPKAPK5  
HOOK2 UTP14A  
EGFR BLK  
EGFR DUSP3  
MCM7 BRF2  
CDH1 NDRG1  
TYK2 IFNAR2  
NCK1 DROSHA  
RNPS1 SRRT  
CCS SOD1  
CENPA HIST1H4I  
CHAF1A WRN  
CALR PDIA3  
PLEKHA5 MID2  
PRMT1 FTSJ1  
PPARA MED1  
IGFBP3 KPNB1  
GTF2F2 CTDP1  
MAPK1 KSR1  
GAP43 PRKCD  
MAGEB2 SRP14  
CBX3 WHSC1L1  
FOS EEF1D  
MED15 MED28  
CRYBA1 CRYBB1  
EIF3F EIF4B  
CTBP2 MECOM  
HSP90AA1 BRMS1  
PSEN2 FHL2  
SUV39H1 HDAC1  
MPDZ HTR2B  
LSM6 SNRPD2  
SFTPD DMBT1  
TICAM1 TRAF6

PFKM SUMO1  
GSPT1 GSPT2  
ATP5B SMURF2  
ATG2A MAP1LC3B  
APC CTBP1  
CAPN1 CAST  
PPFIA4 NCOA2  
MAGEB2 RPL36AL  
UBE2A RPS27A  
SIP1 GEMIN6  
MYC LRPPRC  
UBE2K NEDD8  
GHR PTPRH  
GIGYF2WBP11  
TNFRSF1B DNAJA3  
NRBP1 TSC22D4  
PAK4 LRRK1  
PTPN3 ADAM17  
URGCP CHMP5  
CASP4 XIAP  
SMAD2 NAGK  
HHEX EFEMP2  
HDAC1 PFDN5  
DPY30 CHMP2B  
MAPK1 PRKCZ  
SOD2 MPG  
TCAP TRIM63  
CSNK2A1 RNF7  
DAB2 LRP1  
SFN SAV1  
GNB5 RGS7  
NFATC2 MUM1  
TRAF2 TCEA2  
TRO BYSL  
ESYT1 IKBKG  
MAP3K11 COPS5  
PTPRC CDH2  
USF1 HDAC9  
ZNF259 EGFR  
CCNE1 SMARCC1

AHSG GRB2  
PFKM DYNLL1  
SYT16 SYT14  
NR4A1 NCOR2  
LCK UBC  
TP53 STX5  
KLHL20 KIAA1377  
FABP4 ACP1  
NFKBIA REL  
ATP1A1 APC  
PRKCA OCLN  
HIST1H3J CTCFL  
PDHX PDHB  
MSN HLA-B  
GZMB LMNB1  
AURKATPX2  
STOML1 ACCN3  
ZNF238 DNMT3A  
GRB2 RPUSD2  
EIF2B1 MRPL4  
BAG3 FAM189A2  
EEF1A1 SUV420H2  
THRB PSMC5  
ATRX DAXX  
KCNJ12DLG3  
FASLG SNX33  
DLG2 CRIPT  
HIST1H3D CENPA  
YWHAE RIPK3  
GTF2A1 KDM5B  
SUPT3H TADA3  
RGS5 GNAI2  
UCLH1 TNIK  
UCLH3 COPS6  
GABPA EP300  
SUPT3H TAF5L  
POLR3A RAE1  
IMMT UBQLN4  
YY1 ACTR5  
TAF6 TAF8

CA2 PCNA  
CDKN1A MKRN1  
C4ORF14 ABCB8  
ZW10 KNTC1  
CD79A CPA1  
COL4A2 FBLN2  
RPS27ALGALS12  
DDX3X NFKB2  
BMPR1A SF3B4  
NPEPPSDMWD  
MED28 MED19  
NR3C1 SFN  
NSF PTPN12  
KIF1B DLG4  
SKP1 NFKB2  
GEMIN4 NFKB2  
PNKP LAS1L  
PRKCA FSCN1  
ATM TOPBP1  
IKBKB MAP3K7  
NANOS3 CDC37  
TGFB1 SYNE1  
FAM107A DCD  
PRKACA RSBN1  
RPS27ASALL2  
RPA2 RPA3  
CUL5 COPS7A  
HCFC1 HCFC1R1  
PPP2R2A ATR  
GADD45B PPARG  
HNRNPK DDX1  
FOS ATF7  
ARRB2 RAB5C  
XPO1 SMARCB1  
TP53 AIMP2  
RAB5A RASA1  
SSTR3 SST  
C3 ITGAX  
EWSR1 USP7  
APOA1 CLEC4G

PSMC4 PSMC5  
NSUN2 AURKB  
NR2F2 NCOR2  
TIAM1 CAMK2G  
MAPK1 DUSP16  
HMMR CD44  
PPP2R2A EIF4EBP1  
FKBP3 HDAC2  
HLA-B TRIM28  
C4ORF14 ABCF3  
SSB RXRB  
CAPNS1 TERF1  
PTPN6 CD79B  
PRKCA GNA12  
NOTCH2 RBPJ  
CANX SVIP  
FOS JUND  
PDE6G ADRBK1  
SMARCA4 MYEF2  
COIL PRMT1  
EIF3A BBS4  
YWHAE POLR3H  
PFKL NFKB2  
CENPF CENPE  
GNA11 PTGIR  
GNB5 RGS6  
MTF2 EZH2  
CTNND1 CDH5  
DDX17 NCOA3  
OTUD4 GPHN  
COG4 PLCB1  
POLR3A RPAP1  
DDR1 SNRNP40  
CRKL INPP5D  
MEN1 SMAD5  
NEDD8 FBXO4  
PDPK1 PTPRK  
ORC5 ORC3  
CIAO1 EIF4G2  
CALML3 USP15

TERT RELA  
MAPK1 ALK  
HIST3H3 CREBBP  
EP300 NEIL2  
MAPK1 HSF4  
SPTB EPB49  
KPNA3 COIL  
HSP90AA1 TAB1  
ACTA1 TRIP6  
HLA-B KLRD1  
PIAS2 TOPBP1  
MTA2 ZFPM2  
BACE1 KHSRP  
PFDN1 VOPPI  
GTF2B HSF1  
RORA PNRC1  
EZR MSN  
MPG CAPZA1  
STAT6 ZNF92  
GIGYF2GEMIN4  
ACAP1 VAMP3  
LZTR1 EHMT1  
FBXW5 NLK  
TLE2 HES1  
SIN3B MXI1  
NKAP CEP70  
VHL RPS9  
KCNQ5 DISC1  
GSC SMAD1  
GSC SMAD2  
CBX3 PCGF6  
MCC DRG1  
UBE4B ATXN3  
PRMT3 HNRNPK  
BAX BAK1  
YWHAB OSBPL3  
FST BMP5  
AR CALM2  
ABI1 CBLC  
HDAC3 GTF2I

SPTBN1 SPTAN1  
NPPB EWSR1  
TAF4 TBP  
CCDC85B FAM164C  
LRP2 TLN1  
PTAFR TYK2  
RIPK2 EZR  
HSP90AA1 TOMM34  
DDX21 PRKAB1  
CYLD SPATA2  
KIAA1217 GCC1  
IL1A IL1R2  
ATP1B1BACE1  
LZTR1 ZNF451  
PRKD3 KPNB1  
RPS27ASMAD4  
MYC NCAPD3  
DRD1 COPG2  
TP53 BRCA1  
CFLAR ITCH  
PLCG1 RHOA  
CD2BP2 RBM12  
FAM127B UBQLN1  
RASA1 MAGI1  
GSTZ1 ABL1  
PTPRM PPFIBP1  
SYNJ2 PIK3R1  
IGF1R MAP3K5  
BRAF MAP3K1  
FYB SH2D1A  
VAMP7 STX4  
NCK1 ID4  
NR4A1 CD2AP  
LRPAP1 RTN4  
YWHAE TRAF2  
PRMT5 OLA1  
P4HB HM13  
CBL SORBS1  
BCORL1 HDAC7  
NCS1 IL1RAPL1



SMARCA4 CHD7  
FGFR1 FGF8  
TRIO RAC1  
MED26 MED29  
YWHAB FAM82A2  
WBP4 SNRNP70  
RPL23 IKBKG  
TBP CXXC1  
MLLT4 RAP1A  
TRPC1 RHOA  
ECHS1 UBA5  
APTX SYT17  
SHC1 ZAP70  
TBP GTF2F1  
SHC1 SYK  
SIRT1 HEY2  
ZBTB17CREBBP  
EPHA8 EFNA4  
HCFC1 GABPA  
HCFC1 GABPB2  
NPHP1 ADAM15  
YWHAE LRMP  
ABI1 EPS8L3  
ABI1 EPS8L1  
STX3 TRPC3  
CSNK2B MCRS1  
AKT1 CCDC88A  
AKAP13 MAP3K5  
TEX11 STMN2  
EDF1 PRKCA  
RPGR SMC3  
ZBTB7A DAND5  
FEZ1 RAI14  
PIK3R1 INPP5D  
NDUFA2 LGALS3BP  
CALM2 STRN3  
DLL1 MAGI2  
PSMD13 IKBKG  
MED18 MED4  
ITGB2 ESM1

JAK3 CXC4  
EIF1B APEX1  
CCNC MED1  
RTCD1 RPL35A  
COL9A2 FEZ1  
CAPNS1 MEPCE  
CBL SPRED2  
TFCP2 LIMCH1  
TUBB4 NFKB2  
MAP4K4 GATAD2B  
UBE2U RNF166  
UCL1 USP21  
DNM1 DNMBP  
BMP1B SNX6  
ZSCAN1 ZKSCAN5  
RPN1 STT3B  
BDKRB2 GRK5  
HOXB1 CREBBP  
GH1 DSTN  
CTPS2 SPG21  
TSG101 TRIM35  
CTNNB1 SOX6  
CDK4 RBL1  
SPRY2 CBLC  
BPGM GRB2  
FBXO21 CNTNAP4  
SOX5 SOX6  
GDI1 RAB9A  
TNFAIP3 LRRC47  
AP4E1 AP4B1  
ENO1 SUMO2  
SEMA4F DLG4  
CAV1 BST1  
RXRA NCOA6  
EXOSC8 DIS3  
RPS14 LYAR  
GJB1 SRC  
UBE4B CASP3  
PHB GTF2F1  
AGRP MC4R

CXCR4 GNAI1  
PTPRF GALNT1  
TNFRSF10A ARAP1  
ZNF655 KRTAP4-12  
ANXA2 IKBKE  
USP21 RBM8A  
LCT HSPA5  
UCHL1 VCAN  
COPA IKBKG  
EWSR1 IRF3  
PIK3R2 SYK  
ZNF225 NAB1  
ACVR1 FANCL  
CHAF1A DMAP1  
COL2A1 SPARC  
BMP2 ASCL1  
BMPR1B STUB1  
QPRT KRTAP4-12  
CDH2 PTPRR  
TP53 CR2  
PTP4A3 ARFGEF1  
SULT1E1 INSL6  
CYCS SPNS1  
ERBB2IP DST  
MAPK1 MAPK14  
JAK2 ELP2  
SHC1 IL2RG  
COPS6 CRELD1  
SRC CREBBP  
UBL4A WDR20  
NSF GABARAPL2  
FH MDH2  
CDH2 PTPRK  
CASP2 NOD1  
NOS1 CAMK2A  
KIF3A PLEKHA5  
SUMO1 SREBF2  
NFKB2 DNAJA3  
CDKL5 GRB2  
VARS YWHAZ

EED ITGB7  
USP44 MRPL40  
MAP2K7 TRIB3  
MAP2K7 TRIB1  
PIAS1 CSRP2  
PSTPIP1 DDX21  
UPK3A UPK1B  
MCL1 HUWE1  
ARHGEF40 MYCBP  
FZR1 CDC14A  
CDK2 CDC37  
PARP1 XRCC5  
CARD11 MALT1  
TGFB1 ACVRL1  
PKP4 ERBB2IP  
SHMT2 CSNK2B  
CETN2 SFI1  
PFN2 PLAUR  
YWHAB SLITRK1  
DYNLL1 TP53BP1  
SRC ESR2  
SFN ERFF1  
SYN3 SYN1  
CLASP2 MAPRE2  
TRIP13 STAMBPL1  
IRF2 IRF8  
IPO5 DTNBP1  
PRKCB CISH  
SLC2A4ARFIP1  
RUNDC3A AP2M1  
SLC9A3R1 EZR  
HSF1 REPS1  
YWHAB KIF20B  
SLC9A3R1 ATP6V1B1  
FADD DDX24  
TRAF1 TUBA3C  
SCG2 PIK3R1  
RFC4 HDAC1  
MDFI ZNF581  
UBTF ZMYM2

JAK1 STAT2  
CDC42 RAB35  
SMAD3 KLHL9  
HCLS1 GRB2  
SAMHD1 PHLDA3  
NR1H4 CARM1  
OXT NCK1  
ATN1 ITCH  
DCN TGFB2  
MAP3K7 TUBA3C  
AKIRIN2 SPG21  
ATR SMC1A  
NFKBIE HSP90AA1  
KLHL23 USP22  
DLX3 PRKCA  
TUBB TRAF6  
XPO1 NUP50  
C6ORF47 FGFR3  
JAK2 PIK3R1  
VHL RANBP1  
ZFP36 EXOSC8  
TNFRSF1B HEATR6  
UBE2D1 POLM  
TBP REL  
AMPH SH3GLB1  
RPL10L MAP3K14  
CDKN1A CDC20  
HCRT NPFFR2  
MYO1F EWSR1  
CSF1R CBL  
DAZAP2 TOLLIP  
SEPT11 SEPT9  
MASP2 MBL2  
LGALS2 IKBKG  
DTNB PPFIBP2  
CDK5R1 CDK5RAP3  
TEC WAS  
NCBP1 BNIP2  
HSPA1B IKBKG  
NCBP1 BNIP1

MAPK13 CRAT  
PRKCG ATP6V1E1  
NCBP1 BNIP3  
GMNN PHC1  
CBL UBASH3B  
COIL FAM115A  
ESRRB NCOA3  
HOXB9 RBPMS  
STAMBP AMN  
SCFD1 STX18  
XPO1 EIF2C2  
MLLT4 JAG1  
KLF4 EP300  
RAD21 WAPAL  
APTX CNTROB  
YWHAQ TSC1  
NDN AUP1  
MCM2 GINS3  
SKIV2L2 EXOSC9  
BCL2L1TP53BP2  
CYTH1 IPCEF1  
EEF2K MAPKAPK2  
CREB1 CREM  
EPB41L2 WNK1  
YWHAG SRSF3  
GRIA1 DLG1  
PHLPP1FKBP5  
ATF7IP CADM1  
CTBP1 TCF7L2  
CBX5 MKI67  
EGFR PRKAR1A  
CREB1 ACOT13  
MCM10NINL  
PRPF4 LSM4  
C5AR1 ARRB2  
TRAF2 BANP  
CCT3 MAPK6  
SYN1 CRK  
ATIC CMBL  
RELA SIRT6

REL NFKBIB  
EIF1B ERH  
CTNNA2 PTPN14  
APBB1 SF3B2  
C18ORF45 MDFI  
NFKB1 REL  
ANXA7 SRI  
ATP6AP2 REN  
TCAP MYOZ2  
STAT6 MUM1  
FCAR PILRA  
TCERG1 ABI1  
CCR10 CCL27  
ZNF202 ZNF473  
TP53 EIF2S2  
BCAR3 PABPC1  
CDK9 FKBP5  
GABARAPL2 NIPSNAP1  
MED9 MED23  
FYN SCARF2  
AGTR2 AGTRAP  
ALDOA GPD2  
MAGEA11 ZBTB16  
ODF1 SPAG4  
HSP90AA1 PPARA  
SFN ING1  
STAT5B JAK3  
PPP1CAT USC3  
TRIM27 MAGEA11  
PLSCR1 EXD3  
PSMC4 SRRM2  
EP300 NCOR2  
BNIP3L EWSR1  
APC DST  
IKBKE MLEC  
IKBKE TTL12  
BCAP31 VAMP3  
PTPN12 THAP2  
KCNH4 COPS5  
AR MAGEA11

CALCOCO2 TCEB3B  
RNPS1 SRSF7  
HPRT1 FTSJ1  
PAK3 RAF1  
CCNE1 CCT2  
THOP1 IKBKE  
PKLR ARHGEF6  
MAT2A ACTR6  
HLA-B VMA21  
SYN1 PFN2  
PSMD3 IKBKE  
EP300 GTF3C5  
MAPK14 HSF4  
EP300 GTF3C3  
MRE11A PAXIP1  
ZBTB7B GRAP2  
PPFIA1 MBIP  
FYN CAST  
INPP5F FAM109B  
RNPS1 CPSF6  
MCM10 CEP70  
APPBP2MFSD3  
BMPR1A SMAD1  
KIAA1967 MAGED1  
GPC4 COL18A1  
CRX NR2E3  
KIF22 SIAH1  
NOTCH1 MAML2  
ENC1 TGFBR1  
NTF3 NTRK2  
UBE2E1 RNF4  
CIAO1 AKAP8L  
NR5A1 CXXC1  
MTA2 APPL2  
PAEP UBE2E1  
HRAS LGALS1  
DAZAP2 WWP1  
DYX1C1 STUB1  
KCNG3 KCNF1  
NCOR1 MYOD1



NCK2 RHOA  
MAP1LC3A ATG4B  
EIF2S3 NDRG1  
PIK3R1 SH3KBP1  
GGA1 RNF11  
HMMR MAPK1  
SLC2A2PDX1  
PSMF1 QKI  
PIAS2 ITGB5  
STX3 CPLX2  
CATSPER1 BEGAIN  
NCOR1 PPARC  
CCDC85B ALS2CR11  
FGFR2 EPHA4  
CDK4 COPB2  
GSG1 C5ORF44  
RPS3 NFKB2  
DVL1 HECW1  
SPAG9 NFKB1  
GABARAPL2 FYCO1  
TBP GTF3C5  
TBP GTF3C3  
BMPR1A TAB1  
NCF2 NCF4  
NFKB2 TNIP2  
ID3 TCF12  
PPARC RANBP9  
RAB3GAP1 FEZ2  
TH1L DNPEP  
FCHSD2 VCP  
IPO5 H1FO  
CSNK2A1 ZHX1  
PTK2 PTPN11  
SYT1 SMAD2  
CRK LRIG3  
HIP1 UBE2I  
PRRC2A C1QBP  
PRKRA PRPSAP1  
MYF5 ID1  
SKP2 USP18

RING1 UBE2D4  
SHBG UBE3A  
YWHAZ FOXO1  
CNOT4 CNOT8  
MGEA5 C6  
MFN2 RGAG4  
SYCP2 PITPNA  
PRKACA RASGRF1  
UBE2A MDM2  
KIF4A DNMT3B  
ITGAV L1CAM  
SEC14L3 TAP1  
CDK5RAP2 C14ORF1  
PRKACA CACNA1C  
RNF25 UBE2E2  
NCOA4 MKNK1  
VHL TLE1  
EIF2B1 CREBBP  
SMC1A ATG2A  
CALR PLP1  
ZAP70 SLA  
RFC5 COPS6  
BAG2 PSMD6  
EP300 KLF2  
TOB1 SMAD5  
ATXN1 ZHX2  
TUBB TNFRSF1B  
RFX1 HDAC1  
USF1 PPRC1  
COIL CEP70  
SOCS7 TUBA1A  
AHSG FBXO2  
MED7 TRIM29  
ITGB5 DAB2  
GABARAP GABRG1  
SIX1 MDFI  
CHEK1 XIAP  
POU3F4POU3F1  
ZFYVE9 BMP4  
TP53 HSP90AB1

ZNF263 SUFU  
PRPF4 USP15  
DVL2 RNPS1  
PLSCR1 TFG  
BCL6 HDAC9  
SPTA1 ADD1  
WBP4 DDX23  
PRKAR2B LASP1  
PRKCD COPS5  
FANCL DEC1  
PCNA XRCC6  
SOD1 EEF1D  
SREBF2 KLF13  
HIST1H1A CTCFL  
STAT5B NMI  
TUBB RIPK3  
DLG4 NLGN4X  
RDX TSC1  
NEBL TRIM63  
NCOA2 SRA1  
TRAF7 CYLD  
EPB41 PSMB1  
NR2C2 CD2AP  
PTP4A3 SRPRB  
EPB41 SPTAN1  
BMPR1A GDF5  
ATF7IP PAPP2  
MAPT MARK4  
EPHB2 ERF  
RANBP9 WNK1  
STAT3 TSLP  
PLCG1 COBRA1  
NCK1 MAP4  
PSME3 IKBKE  
SKP2 CDT1  
IMPDH2 ATG5  
ACTB CNN2  
LCK TRPV4  
SRC SMARCE1  
ATF1 CREM

NCF2 PRKDC  
PFKL COPS6  
INSL6 CRCT1  
RAF1 HSP90AB1  
AGT AGTR1  
NPPA NPR3  
PTP4A3 TNPO3  
KRT7 LAPTM5  
DRD2 FLNA  
PSTPIP1 ATIC  
CD59 GRB2  
TRIM27TRIM23  
COMT MCC  
FKBP3 TNIK  
RGS16 GNAT1  
PIK3CA GRIN2B  
RELA FAM123A  
PPP3CBSLC8A1  
TCEB2 CEBPE  
PTTG1 NUP98  
ADAM17 FHL2  
TTR EEF1A1  
GEMIN4 DDX20  
EIF3H POLR1E  
DBC1 SMPDL3A  
TWF1 Bmpr2  
MAP3K7 DNAJA1  
CNOT4 UBE2E1  
TRIM28CDCA4  
SLX4 ERCC4  
MAPT CASP6  
MAPT CASP7  
RANBP9 DISC1  
RAI2 FHOD1  
FLNA FLNB  
PLSCR1OGDH  
MAP3K6 MAP3K5  
NPM1 TRAF6  
MYH10 ZNF512B  
CSRP3 LDHD

CNOT7 CNOT6  
JAK2 PLCG2  
PCNA HLTf  
ATF2 ZMYM4  
NFKBIE EPRS  
NOTCH2 MAML3  
HIF1A KAT2B  
ZSCAN1 MED31  
EWSR1 NLE1  
SERPINB9 SETDB1  
NR3C1 SMARCA4  
CLPS PNLIP  
BLM FANCM  
MAPK3 RALGDS  
ILK KCTD5  
NR3C1 SMARCA2  
DPP4 GPC2  
HCK TRPV4  
YWHAB ALS2  
STK25 SLMAP  
CDC25B FBXW11  
RPA1 BLM  
MYC SNRNP70  
ATXN3 TEX11  
BUB1 BUB3  
CFLAR RAF1  
HMOX1NOS1  
SFN PTOV1  
PPM1B ARRB2  
KCNIP4FAM120B  
MAPK1 TNKS2  
ACTA1 SMURF2  
DNAJB1 SERP1  
UBE2W RNF150  
MAP3K14 IKBKG  
TUBG1 TUBA3C  
FBXW7 HEY1  
NR5A1 PROX1  
TCEB2 TSC22D1  
ATXN1 TCEANC

MAGEA11 VTA1  
MAPKBP1 APTX  
UFM1 UBA5  
ACTB LGALS13  
TTR EEF1A1  
SET SGOL1  
TGFB1 RNF130  
NRG2 ERBB3  
SKIL HDAC1  
ZNF593 ZNRD1  
MYF5 ID2  
GRM1 GPRASP1  
HSPA5 RELA  
NCOR1 HIST1H4I  
PSMD7 PSMD1  
HGS WNK1  
HBM THBS1  
DCTN2 BICD2  
UPF1 SMG5  
DLG3 CRIPT  
CUL1 COMMD1  
SKIL SNW1  
WASL RHOQ  
ATXN1 NUMBL  
SIN3A MBD3L1  
MLF1 COPS3  
LAMA5 FBLN2  
MYOG POLR2C  
STK25 PPP2R1A  
MAGEA11 MYOZ1  
STK25 PPP2R1B  
GDI1 RAB27A  
SCAND1 ZSCAN21  
SLC7A9THOC4  
MED14 ABL1  
HCK CBL  
SKP1 FBXO41  
RNPS1 SREK1  
GLUL NUDT18  
SKIL TDG

ZNF277 MAP3K2  
SAP130 SUDS3  
SLC25A6 CUTC  
CASP9 BIRC6  
NR5A1 CREBBP  
NCS1 KCND2  
TMBIM4 CMTM6  
CLDN3 TJP1  
TGFB2 FSTL1  
MAPK8 HDAC9  
CDKN2A ING4  
RELA NCOR2  
TOB1 RPS6KA1  
EPPK1 INPP5K  
CDK9 PIN1  
PTP4A3 TMEM33  
KCNH4 HOXB13  
EPRS IARS  
SUMO1 CHD3  
THPO MPL  
EGFR GAPDH  
RUNX1 TCF12  
SETDB1 USP11  
CD63 CD82  
VCP SVIP  
LMO2 SMAD2  
CCNA2 UIMC1  
CLU DISC1  
UBE2N UBE2V2  
TAF5 TAF15  
FGF1 FGFBP1  
CASP9 CYCS  
WNK1 ZNF839  
SGK1 HNRNPM  
RAP1GDS1 ZNF451  
THOC4 RBM8A  
ERN1 HSPA5  
MCM3 RAD52  
HGS GKAP1  
ITGB2 FHL2

RAF1 PPP1CC  
HNRNPU RUVBL2  
TP53 MTA1  
CRX C2ORF65  
SCNN1B COMMD1  
PDPK1 PRKCB  
ARL2 BSND  
APC TRIOBP  
HSP90AB1 WNK1  
DLG4 NLGN1  
PIK3R1 YWHAG  
IARS AIMP2  
VDAC1 CYCS  
MAOB RPS27A  
BCL2L2BAD  
ATAT1 NCOA2  
DDX58 ATG5  
EPB41 MYH1  
MTA2 RBBP7  
PFAS IKBKE  
CDK9 ATR  
KIAA0776 CASP4  
YWHAQ CSNK1A1  
LAPTM5 SMURF2  
CCNT1 HEXIM2  
MAP2K1 ZHX2  
ARRB1 CDC42  
TP53 ATM  
TP63 SATB2  
PRKCI USP20  
FOS SERBP1  
AGT MEP1A  
RNASE4 RNASEH1  
FASN MAP3K3  
PDGFRA SHB  
RPF1 LAPTM5  
CP GAST  
HRAS PIK3CA  
PIR BCL3  
TP53 PPP2R5C



ESR2 MED16  
HARS TARS  
STAT3 PTPN11  
LCK CD247  
MAPK3 PTPRJ  
BCL2L1PMAIP1  
TGFB1 TGFBR2  
PFDN1 KIAA1377  
FAS CD47  
PABPC1 SYCP3  
MYH10 MARK4  
YWHAE NDEL1  
TNR SIGLEC1  
MED10 MOBKL3  
UBQLN4 RNF11  
UBE2I DTX3L  
TERT SMG6  
BLOC1S2 MUTED  
LCK RASA1  
SRF CREB1  
CDK9 MED21  
APAF1 CASP3  
PIAS1 GATA4  
EDA EDA2R  
SYK TUBA4A  
PES1 ARRB2  
MAPK3 CDC25C  
KIAA1967 PHLDA3  
KCNA4 SNTG1  
HTR2A GNA11  
ATP2A2 TRAF6  
TAF10 SPTAN1  
POU2F2HMGA1  
GTF2B PKP2  
PMS1 FAN1  
DMWD TSNAX  
NCL RELA  
CTNNB1 KIAA1109  
TCF21 LMO4  
MAPK14 MUC12

TLX3 DAND5  
WBP4 SF3B3  
CBFA2T3 LDB1  
ACTA1 CYFIP1  
DVL2 FAM105B  
ADAM9SH3GL2  
ATP1A1 MAPK1  
YWHAG CRTC2  
CTNNB1 SOS1  
HFE TFR2  
E2F1 NPDC1  
HSPA9 DNAJC19  
EFEMP2 FAM124B  
RPA2 XPA  
SORBS3 HNRNPK  
IL11 IL11RA  
RGS2 DDR1  
PRKCD INPP5D  
KIF5B KLC3  
HMGB1 TLE1  
HMGB1 TLE2  
ZNF225 NFATC2  
EFNA5 EPHA4  
EFNA5 EPHB1  
RAB14 EEA1  
HIPK1 SNIP1  
CDC73 RTF1  
HDAC1 GATAD2B  
PIK3R1 CRK  
SOD2 MYH8  
FFAR2 GNAQ  
THRA NCOA1  
GNA15 OPRM1  
NPM1 EPHB3  
SRC BCAR1  
RANBP2 CBX3  
PIK3R1 CRKL  
ITGB3BP ENOX1  
ILK IGF2BP1  
SYNE1 DISC1

CDH1 CREBBP  
PTK2B SORBS1  
EFNA5 EPHA5  
HSP90B1 SMARCC1  
RNASE1 RNASEH1  
YARS IKBKE  
HLA-B FUS  
CALCOCO2 ZNF101  
EIF2S2 CSNK2B  
NR0B1 NR5A1  
PRKDC RELB  
MYC CSNK2A2  
ABL1 BCAR1  
FBXO5 FZR1  
SKP1 FBXW9  
SKP1 FBXO31  
RBX1 FBXW8  
RABGGTB RAB11A  
SNAPIN TRPV1  
EPHA4 NGEF  
DLGAP1 FYN  
PPP1CAATM  
CD3E PIK3R1  
PLSCR1ILF3  
TTC28 SSPO  
LIMK2 ROCK1  
DDX3X CD40  
NPM1 ARF1P1  
SYT17 TSC22D4  
KRT15 TSG101  
ZNF277 RAPGEF2  
HLA-C PSMD6  
ABHD16A HNRNPA1  
TFPI MMP12  
KIF1B DLG2  
CD4 CD38  
NUDT18 KCTD17  
HSP90AB1 PSMD1  
BMP2 SOSTDC1  
FYN MAG

HNRNPU BTRC  
HLA-A DEK  
CDK4 PCNA  
FXR2 AMOTL2  
MYH7 TEAD1  
RELA COMMD1  
CDH1 HDAC2  
PIP5K1C LRP2  
ULK1 OCLN  
APP GRB2  
RINT1 STX18  
PEBP1 CACHD1  
DEDD SMAD3  
RFC4 PMS1  
HDAC2 SMC3  
WWP2 UBE2L3  
DLX5 MAGED1  
ANKRD33 PPP6R1  
TP53 MAPK8  
BMI1 PHC3  
MEF2A USF2  
AEBP2 RALYL  
RASSF5SAV1  
BMPR2 TOPBP1  
LDOC1 KRT15  
TP53 MAPK9  
YWHAE WWTR1  
TACC1 CKAP5  
RPS6KA4 FOS  
GNB2L1 DDX19B  
YEATS4 TFAP2B  
BCL2L11 MAPK8  
SOCS7 PLCG1  
USP8 GRB2  
BCL2L11 MAPK9  
MED10 MED16  
BMPR1B RASD2  
MYBBP1A DDX56  
TBC1D25 FEZ1  
AR PMEPA1

ILK PCID2  
ACHE GNB2L1  
ACHE LAMA1  
HMGB1 FOXA3  
PCNA POLD1  
PSMC3 PSMD7  
NEK6 PTPLAD1  
UBE2D2 UBE4A  
EIF3A UPF1  
PVRL1 PVRL3  
HDAC3 GCM1  
PAFAH1B2 PPP1R12C  
MOBK3 CTTNBP2  
EEF1D FTSJ1  
FYN CD247  
RPS4X MAP3K14  
USP8 RPS27A  
PBXIP1 CCDC53  
APCS FCGR2B  
MCC SFXN1  
SFN RALGPS2  
GAPDH APP  
ERBB3 HDAC6  
POLR2E RPAP3  
RAG1 HMGB2  
SMARCD3 SMARCC1  
SFN LSR  
NR2F1 HNF4A  
GAPDH NR1H4  
CTLA4 PIK3R1  
DFFA EWSR1  
EXOSC8 EXOSC1  
CDK9 SNW1  
CDC42 CNTNAP1  
TP53 RCHY1  
GP1BA YWHAZ  
HIVEP2 YWHAG  
USP19 PTCRA  
CRK RGS7  
LIN7A DLG4

SKIV2L EXOSC4  
TP63 JPH1  
ATP5B IKBKG  
CDK6 RUNX1  
MAFG GTF2A1L  
SLC9A3R1 GRK6  
HAP1 ZNF33B  
AR MAPK1  
RHOB KCTD10  
RFC1 RFC5  
MAX DST  
MTSS1 HTT  
RFC1 RFC3  
WBP4 SF3A2  
ZZZ3 PCBD2  
INS GK  
WBP4 SF3B4  
NRCAM MACF1  
EIF4G1 USP3  
STAMBP UACA  
XPO1 EIF2C1  
TNNT1 FXR2  
MCM3AP TMEM216  
ESR1 LDB1  
SIAH2 AKAP1  
KCNA4 NDUFA4L2  
GLRA1 HMGCS2  
HNRNPA2B1 SREK1  
TNNT2 TNNC1  
TCERG1 NONO  
EPB42 STX12  
APP CNTN3  
FOS BCL3  
ERBB3 CDK5  
HIF1A COPS5  
DAPK3 DAXX  
NDN SRPRB  
OTX1 KRTAP4-12  
SFN RHPN2  
BCL6 ZMYND8

SDC4 CXCR4  
MYO5BKIAA1549  
MED24 MED30  
CACNA1F FYN  
NAPA STX1A  
HEXA CRK  
MMP13 CCL7  
SUMO2 HSF2  
FMR1 NUFIP1  
SUV39H1 DNMT1  
POU2F2XRCC6  
GABARAP PDCD6IP  
USO1 STX5  
SYNJ2 ITSN2  
MAGEB2 LXN  
GPRIN1 CAMK2A  
CD5 CD79B  
ATP6V1E1 TRAF6  
WNT5AFZD5  
CCT6A PPP4C  
WBP4 WBP11  
PABPC4 SREK1  
HSP90AB1 MAP3K14  
COL4A1 TGFB1  
TRIM2 UBE2D4  
LRDD EFEMP2  
MED17 MED19  
FAM107A TRAF2  
HSPA5 DPH1  
COL8A1 UBQLN4  
SRI ALG2  
PTPN1 STAT5A  
HOXC11 SOX8  
SEMG1 UBQLN4  
MTPN DSTYK  
GLRA2 FBXL15  
HIST1H1C PRKDC  
BNIP3L STEAP3  
APC SFRS18  
DYNC111 DYNLL2

PPP1CA PPP2CA  
TP53 CD40LG  
PHYH PTH2R  
SOCS1 MAP3K5  
PDC ADRBK1  
NFIC RFX1  
MRPS28 TFCP2  
CASP7 CLSPN  
GRB2 USP53  
NCOR1 CEBPB  
AP2A1 EPN1  
PML SIN3A  
TP53 HSPA1B  
RADIL POLR1E  
TAF10 TAF9B  
CCDC90B SDHAF2  
CASP1 IL1F7  
EXOSC10 PTGES2  
EPOR CRKL  
GNA11 BDKRB2  
RECQL5 POLR2G  
KLC1 ODF1  
XPO1 NXT1  
CRK DLGAP2  
PAK1 CRIPAK  
DUT PLEKHF2  
EIF3H CSNK2A1  
RHOC PINX1  
MDM2 ZNF766  
ESR1 RBM23  
CHRM3 ARF1P1  
EPB41L5 PRKAB1  
DYNC111 BICD1  
ARF3 PICK1  
EFNA2 EPHA7  
DMC1 DNAJA3  
MAPK7 MMRN2  
RAB6B RABGAP1  
CDK2 CDKN1A  
CTBP1 TGIF1



COL1A2 ITGA2  
HDAC2 PA2G4  
PRKCA PPARA  
HNRNPF VAV2  
BRP44 C20ORF24  
ISL1 LMX1A  
ATG12 ATG16L1  
VHL DTYMK  
CDK4 NCOA2  
IDH3A IDH3G  
MARS RELA  
ZFP36L1 WNK1  
CYCS BCL2L1  
PHYH COPS3  
CD47 UBQLN1  
SRC CD97  
FEZ1 KIAA1377  
NCOR1 GRB2  
CDK1 MNDA  
EIF2AK2 TARBP2  
BCL10 UBE2N  
UBE2E1 UBE2G1  
SPEN SRA1  
NCOR1 RPS27A  
DNM1L BCL2L1  
NCAM1 GDNF  
CCND2 TSC2  
ST13 MAP3K3  
TTC37 PAF1  
YWHAZ TFPC2  
MED10 MED31  
YWHAZ AKAP13  
C5ORF25 WNK1  
GINS4 GINS2  
GLP1R GPRASP1  
BCL2L2BMF  
ESR2 REXO4  
STRN STK24  
YWHAH USP43  
TNNT2 MAP2K5

HOXB1 PKNOX2  
MTA1 ZFPM2  
TRAPPC3 TRAPPC9  
ATXN1 NCOR2  
TUBB4 LIG1  
AP4M1 AP4E1  
SSR4 TSC22D1  
HMGB1 FOXC1  
ADCYAP1 VIPR1  
FGF2 FGFR2  
WDR5 MBIP  
WBP4 SF3A1  
POLR3A GTF2B  
EGFR JUP  
AR SMARCE1  
NCK1 MEPE  
ACTB STX4  
CDC25B SFN  
NEDD8 FTSJ1  
CDC25B YWHAB  
NAA38 EXOSC6  
ATR CHD4  
RYBP RNF2  
SS18L1 NR1H3  
RBMX ZNF490  
VTN FGF2  
MAP2K1 MAP3K4  
CDK2 MCM3  
DYNLL1 PAN2  
OBSCN RAPGEF2  
TGFB2 TRAP1  
LETM1 MCC  
CSN2 RAC1  
BEST1 PPP2R5A  
LPHN1 SHANK2  
ZFP36 XRN1  
YIPF4 YIPF3  
MUC1 ERBB3  
CUL2 DCUN1D1  
SETD1A WNK1

PRKAR1A NCL  
KLHL2 KLHL12  
HSPA2 EWSR1  
DDX11 CHTF18  
PGAM5 ZRANB1  
UBE2I DHX9  
SUMO2 HNRNPK  
PPIH MEPCE  
PRPF3 CCDC85B  
SERBP1ARX  
UBE2D3 LRSAM1  
TRIM27PIAS4  
SMAD9 TTC37  
RPL5 AMFR  
TOP2A CTNNB1  
FIGF FLT4  
MYOD1ID3  
UBE2D2 RNF111  
ACTN2 LRRC7  
KRT14 TRADD  
MAP1LC3B TBC1D2B  
ZAP70 CBLB  
MAP1A NXF1  
RAC1 MAGI1  
STRN CCT7  
TNFRSF1B SLC25A1  
CREG1 IGF2R  
TRDMT1 FANCI  
TAF1 GTF2E1  
EDF1 PPARG  
PLCG2 DAPP1  
GADD45G PTN  
DDX6 EIF2C2  
SFN YWHAZ  
ITGB2 PTK2B  
RAC3 CWC15  
LMO2 ELF2  
GTF2F2ARNT  
TUBB IKBKG  
TAF1A TAF1B

EZR CASP10  
ACTA1 SCIN  
MAPK8 HSF4  
FNBP1 GABARAPL1  
S100A4 NOV  
NCOR1 PPARA  
IL16 KCND1  
INSR SMAD2  
TDP2 TNFRSF8  
WWP2 CLCN5  
XRCC6 TBCD  
MYB CEBPE  
CDC42 ARHGEF6  
MAP3K12 MAP3K11  
TJP3 OCLN  
NDEL1 ZNF230  
STAT1 EIF1AD  
LGI1 DLG4  
RAE1 AGGF1  
STX11 FHL5  
RPA2 RAD52  
GOT2 PC  
NFKB1 NFKB2  
CUL5 COPS3  
DMWD SDF2  
MATR3 HNRNPK  
UBE2K RNF111  
RHOQ TRIP10  
CAND2 UBE3C  
ACVR1B TGFBRAP1  
IL4 CD53  
SMAD3 C10ORF118  
PDCD6IP UBA5  
FGR SYK  
CASC3 MAGOH  
NUP205PHB2  
RNASE4 ATP6AP1  
GADD45A PPARA  
IRS1 TUB  
MLF1 YWHAZ

PTBP1 ZMYM2  
SFN CCAR1  
NCOR1 ATXN3  
ID3 MLX  
RPL8 ARL15  
NCOR1 ATXN1  
PMF1 DSN1  
EIF1B PIN1  
AIRE MYBBP1A  
PLD1 PKN1  
CAMK4CAMKK2  
BLM TP53BP1  
PRPF4 LSM2  
MARK3DYNLL1  
TOB1 SMAD2  
CDC37 NEK6  
TOB1 SMAD1  
EWSR1 ZDHHC3  
WBP4 SF3B4  
FANCA NAMPT  
AKT1 HIST2H2BE  
CCDC85B LMO3  
LPXN ZNF426  
UBE2I RNF128  
CHD3 IK  
SND1 CREBBP  
SH2D1A SLAMF7  
PTS WDYHV1  
EP300 STRAP  
NFYC CIC  
DSPP NFKBIB  
MEN1 MYB  
STRN3 SIKE1  
AR DCC  
PARP1 RXRA  
PLEKHF2 SPEF1  
MCF2 RPS27A  
MARK3YWHAZ  
NFKB1 CLTC  
C10ORF12 EWSR1

ACTR3 CTTN  
GH1 GHR  
BCAR1 GRB2  
PSMD2 PSMD5  
RELA NCOA3  
NEFL YWHAG  
GRN CDK9  
RPS27AUSP36  
STRN CTTNBP2  
CCAR1 TRIM55  
APC MINK1  
PRKCD CREBBP  
BMPR1B DCAF12  
MLLT4 NRXN2  
CD47 BNIP3  
RPS15AMAP3K14  
SYK RPS6KB2  
MYOD1EP300  
PHYH ACSL6  
RASGRP1 VHL  
PRMT5 SSTR1  
CAV1 GJA3  
CUL4A DCAF4  
GFI1 PICK1  
KIAA1217 SORBS3  
ATG12 KRTAP4-12  
SDC4 SDC2  
FAS TRADD  
MAP3K7 RIPK1  
HSPA4 TELO2  
DSPP STK24  
MTHFD1L MAGED1  
CUL4A DCAF12  
MYOD1TCF4  
PGR DAP3  
GATA2 EP300  
ITGB1 ITGA8  
NFKB1 NFRKB  
CXCL13 CCR10  
PRKCA AVPR2

ETV6 ACTA1  
GTF2H1 CCNH  
RPS5 SRRM2  
MTHFD1L NEK6  
NUP214NXF1  
PPP5C GNA13  
SFN PACS2  
PTPN2 CDK5  
DAND5 SMARCA4  
TPM1 TNNT1  
PPP2R1A PPP5C  
PRKCA PICK1  
RET DOK5  
GNAI2 CXCR5  
PDGFRB PRDX2  
PRKCB HSPA4  
PTP4A1 ZNF182  
NDC80 RB1  
YWHAZ MSL2  
LPA IGSF21  
ULK1 CDC37  
CALM2 PPP3R1  
BCAP31 TRAM1  
EMD HDGF  
PTAFR RGS4  
EPB41 PIN1  
NLRP1 PYCARD  
AMPD1 MYH2  
RAP2A MINK1  
ZNHIT1 TP53BP1  
HTRA2 XIAP  
ORC2 CDC5L  
TRADD ATAD3A  
ERCC3 GTF2E2  
GTF2E2 MDM2  
ATG3 ATG4B  
APBB1 CYFIP2  
ELAVL1 TNPO1  
SMAD9 NAGK  
DVL2 TIFA

RRP1 PINX1  
EPOR KITLG  
HNRNPH2 YWHAZ  
GAP43 CSNK2A1  
ERCC3 GTF2E1  
SUMO2 LEF1  
BCL3 NCOA1  
DLEU1 UBR1  
DAND5 CHD3  
PAK4 GRB2  
GRIK5 LRSAM1  
STK25 FGFR1OP2  
MTHFD1L PHLDA3  
MTA2 DPEP2  
PGLS EWSR1  
DDB1 CDT1  
THRA OASL  
THRA TRIP11  
SLC22A3 PDZD3  
IL3 BCR  
MAPK3 HSF1  
SIRT1 USP22  
BNIP2 BNIPL  
HIST2H2BE BCCIP  
APLP2 SPON1  
DAPK3 MET  
CDK9 TRIM28  
APBB1 CCDC97  
HSPA4 TRAF6  
THRA MED1  
GFI1 PRDM5  
HSPA1B RAPGEF2  
MAD2L1BP KIAA1377  
SYK HDAC6  
SMAD9 LNPEP  
TSC2 SKP2  
GSTM3 PAK2  
PRKCA YWHAZ  
PSMB3 PSMD6  
ITGA2 CIB1



SFN TSC2  
EEF1A1MYOC  
NPR1 ATF7IP  
APOB HSPA5  
NFKBIA SKP1  
CNOT6L TNKS1BP1  
KIT CBLB  
PRKCA CHAT  
COMMD1 COMMD10  
MATN2 COL1A1  
PDCD6IP GSTK1  
SREK1 SRPK3  
PCDH17 UBQLN4  
MYST2 C15ORF29  
DAPK3 DAXX  
DCTN3 ATXN1  
SH3GL3 WDR33  
CST6 CTSB  
APC KIAA1524  
RPN1 RAD23A  
ARF6 KIAA0090  
PAX3 MSX1  
KIT MPDZ  
PSPH ASF1B  
MATN2 COL4A1  
PSMD12 USP20  
SPINT1 FAM46A  
PRKCB GRM5  
SMAD9 MBD1  
SMAD3 KIAA1267  
RPF1 PRPF8  
MYH9 NFKB2  
BIN1 SH3GL2  
GLI1 SUFU  
PTPRG TEK  
SLC25A3 RIPK3  
TFPT TCF3  
PRPF40A FMNL2  
SERPINC1 KLK2  
ZNF521 EBF1

CBX5 HIST1H4I  
HDAC1 MBD3L1  
CSF2RB MAD2L1  
ICMT HRAS  
SMAD3 EP300  
TNFAIP3 GLDC  
KEAP1 FAM46A  
VPS11 STX8  
LCK PRKACA  
IFIT5 MAST1  
RASSF5MAP1LC3A  
LGALS3 LIM2  
FOXP2 FOXP4  
EP300 LGALS12  
HSPA1B MYSM1  
HGS UBC  
ZNF24 HAP1  
BRCA1 MED17  
ID1 NKX2-5  
SPI1 HDAC1  
ITSN1 EEF1A1  
MAPK1IP1L EWSR1  
CDC42 FMNL2  
BRCA1 DHX9  
LASP1 DAZAP2  
SFN PPFIBP1  
PAF1 RTF1  
CHAT CAMK2G  
CAMK1CAMKK1  
MAP3K5 TRAF6  
BCAR1 FXYP6  
CDK9 HNRNPA0  
AIFM1 CASP3  
DAND5 BRCA2  
CENPF NDE1  
FAR1 C20ORF24  
STAMBP OTUB1  
SHCBP1 ZUFSP  
RRAS2 PAWR  
VHL PLP2

CAMKK2 SMC3  
SAP18 YARS  
FYN SRC  
SLA TIMM50  
CASP4 CTNNBIP1  
RAN VRK3  
RHOC IKBKE  
PRKACA ATP2B1  
ATF7 ACHE  
FXR2 TSC22D4  
NFKBIA ACTG1  
KIF5B ARF6  
AMOT LIN7C  
ZZZ3 TRIM22  
ATN1 CTNND2  
MYO7AKEAP1  
SLC9A3R1 PLCB2  
PER3 CRY1  
ATN1 BAIAP2  
MAPK1 PLK3  
APCS GRB2  
QARS AIMP2  
A2M PRDX2  
RUNX3 HDAC9  
IRS4 NISCH  
EIF2S1 EIF4G2  
NCK2 RHOV  
DNAJC7 SMURF1  
SRC CEACAM21  
PPARG ZNF496  
MYH10 BCAP31  
ALDH2 FAM45A  
PRMT1 TNIK  
TACC1 AURKB  
SLC38A1 TP53TG1  
SMAD9 XAB2  
IL6R ERAP1  
TAL1 SATB1  
NAPA SOS1  
WEE1 FBXW11

CDC27 ANAPC7  
ACTA1 MYO10  
TAF4 CBX5  
TIMP1 MMP2  
MED17 MED29  
TCERG1 PCBP1  
NR2F6 ATP6V1D  
TIMP1 MMP3  
CALM2 YWHAZ  
SRF FHL2  
PHLPP2WDR20  
SLMAP MOBKL3  
LDOC1 NRIP1  
CCDC85B LNX1  
NGFR PRKACB  
DRD1 CAV2  
EWSR1 CCDC7  
PRKRIR EIF2AK2  
RGS19 OSTM1  
NEK1 ZNF350  
TBXA2R GNA11  
YWHAB FRMD6  
ILK FANCI  
TACR3 GPRASP1  
ID3 IFI16  
MMP2 SPOCK1  
TUBA3C TANK  
TAF4 CREB1  
F2 F2R  
BRCA2 USP11  
CHMP5 CAMK2A  
TIMP2 RAB3A  
ZEB2 CTBP2  
NR4A1 ERC1  
NMT1 CABP1  
GLCCI1 VPS28  
TGFB1I1 SVIL  
MCC PSMA3  
PCSK1 CTNNB1  
CD28 CD86

JAK1 JAK3  
CDC27 GRB2  
SALL2 EWSR1  
RECQL5 PRKDC  
HNRNPF NDRG1  
ARVCF CDH2  
TCERG1 SF3B3  
PRPS2 PRPSAP1  
VASP TES  
CCDC85B ZNF417  
EGFR MAP3K12  
IKZF5 IKZF2  
SFN RFFL  
APC ZFP106  
GZMB BID  
ERCC2 RAD51  
HRAS DGKZ  
E2F2 MCPH1  
GNAO1 DCTN2  
BACH1 BRCA2  
CDC42 CDC42BPA  
ROGDI DISC1  
TCP1 CDC20  
SPI1 MECP2  
TP53 TP53BP2  
MET SMC1A  
BCL6 HDAC4  
MYC EFTUD2  
TGFB1 FLNA  
IKZF5 IKZF3  
RPA2 COPS6  
GTF2H1 MMS19  
KCNJ2 DLG4  
HSPA4 REL  
FOXO4 CREBBP  
MAPK14 SMEK1  
ZAP70 LCP2  
IMMT BMI1  
G3BP1 ASCC3  
MTA1 MBD3L1

H2AFX NLRP2  
ACTB MYO1E  
RNASE2 ABCE1  
MYC BRD3  
CACNB4 CACNA1A  
SYN1 PLCG1  
BCL2 PPP1CA  
GABARAPL2 UBE2O  
EPB41L2 YWHAE  
MAPRE2 PHLDA3  
MDM2 RASGRF1  
GLRX3 RGS20  
NUDT21 RELB  
ESRRA EXOSC6  
CLTA GRB2  
IMMT BMI1  
BCL2 PPP1CB  
FYN GUCY2D  
UBE2N TRAF6  
HSP90AB1 RPAP3  
PGRMC1 MTNR1A  
SETDB1 ZFP64  
CCL22 CCR4  
GAP43 SHC1  
RBL1 PHB  
RGS20 GNAI3  
NUP153 USP20  
STAT5A NCOA1  
MLLT1 DOT1L  
SMAD1 RAB6B  
CDC5L SFI1  
YWHAZ PTPN13  
MAP3K7 UBC  
UBASH3A DNMI  
SAP18 NUP93  
TP53 ZNF24  
HSPA5 PCSK7  
DYNLL2 HOMER3  
SMAD4 MEX3B  
USF1 RBBP7

CCDC90B ARL15  
POP7 RPP38  
PPP1R15A EIF2S1  
POP7 RPP30  
UCHL1 LAMP2  
RAD17 USP20  
NPHS1 CDH3  
BRAF RAP1GAP  
RELA ASCC1  
PSMD14 UCHL5  
SPINT2 CTSB  
YWHAZ LRMP  
EEF1D MAPK14  
KHDRBS1 GRAP  
RELA BANP  
EWSR1 DMRTB1  
KLF3 FHL3  
SMARCC1 BAZ1B  
RBPMS QKI  
UBTF TLE1  
PPA1 WIPI1  
KIT STAT5B  
CDC20 CDC16  
CUX2 CSNK2A1  
PSMD4 ACO2  
ESR1 NFKB1  
PTTG1 CDK1  
KHK RNPS1  
MYOD1TCF3  
MAP2K7 ERC1  
PDPK1 SND1  
PDCD6IP RNF11  
FLNC KY  
SORBS3 ZBTB25  
NR4A2 NCOR2  
TBP TAF9  
TPM4 PACSIN1  
APC KIAA1370  
SUPT3H MED17  
TRAF2 TCEANC

PIAS1 SUFU  
NHP2L1 RBM10  
PABPC1 CDK2  
KCNH4 CREBBP  
SUPT5H HTATSF1  
YWHAZ TRAP1  
FGFR1 TENC1  
SNRPA PTBP1  
TGIF1 SMAD2  
DAND5 VHL  
TGIF1 SMAD1  
AXIN1 NCK2  
NOS1 STUB1  
PLSCR1NECAP2  
EWSR1 ELAVL3  
SFN HDAC4  
ACTB NRAP  
AHR DDB1  
RB1 MORF4L2  
MAPK14 BAZ1B  
TRIM23 TRIM29  
PPP1R8 CRMP1  
HOXA3 PWP1  
TGFBFR1 CSNK1A1  
GSK3B DDX20  
ROCK2 RHOA  
BCL3 RUVBL2  
ACTN2 UTRN  
DTX3 UBE2W  
DHX16 MEGF10  
TRIP13 PLAC8  
GLRX3 KRTAP4-12  
ANKRD34A IER3IP1  
XRCC5 NCOA6  
HLA-B ARX  
EIF1B PAICS  
MET SH3KBP1  
CDK2 CDKN3  
GRIN2D DLGAP4  
KPNA1 LEF1



IKBKB MAP3K1  
SCNN1G COMMD1  
SF3B2 CDC5L  
PPP1CCPPP1R2  
MAP3K5 MAP3K2  
GZMB CHRM3  
PSMD6 PSMD1  
ASAP2 PACSIN3  
WEE1 SMAD3  
HDAC3 THAP11  
TRA2B YTHDC1  
MAN1A2 GTF2F2  
MAPKAPK2 PINX1  
PAEP COPS6  
MAPK1 DUSP5  
DAZAP2 RNF208  
CCDC85B TSPYL4  
STAT3 IL23R  
YWHAB AKAP13  
ZIC2 GLI1  
FYN HNRNPK  
IGF1R YWHAE  
F2 GP5  
ZZZ3 BLZF1  
TMEM33 NDN  
TYR TYRP1  
ASS1 MLH1  
USP19 USP7  
CUL4A COPS8  
HSP90AA1 HSPA4  
BCL6 BACH2  
TP53 TDG  
HERPUD1 DERL1  
AR CTNNB1  
XPO1 CIITA  
DMAP1 DAXX  
CSNK2A1 GTF2A1L  
SAFB2 MAP1LC3A  
UBE2E1 RNF167  
ZNF646 MDFI

SSFA2 LUC7L2  
EWSR1 HLTf  
CSNK2A1 FAF1  
AR PHB  
EXOSC8 FHOD1  
ACTN1 SLC2A4  
PRKCG GRIN2B  
ATXN1 PLEKHA5  
CDK4 RFC1  
PAK1 ARHGGEF6  
TEAD2 VGLL1  
MRE11A SUMO2  
TP53 HDAC1  
CAPG NCAPH  
TRIM2 MYO5A  
MAPK8 DUSP4  
ADAM15 SPAG5  
PABPC1 PCSK7  
SAFB USP45  
CDH1 RAB8B  
CD22 ATP2B4  
LTF LYZ  
TFAP2A CTNNB1  
UBC OTUB1  
CDK9 SKP2  
NFKBIA VCP  
PSMC3 PSMD4  
CUEDC2 EWSR1  
HOXC9 IRF9  
FGF4 FGFR1  
TAB1 HSPA1B  
RPE65 SLC27A1  
PSMD6 PSMB7  
TGFBFR1 TTC27  
PAK1 CDK5R1  
FXR2 ZNF451  
SETDB1 TOLLIP  
PRKD1 HDAC5  
GTF2B DHX9  
THRA NCOA2

CTBP1 PNN  
AP2A1 CD22  
CXCR2 GPRASP1  
MYO1CGIPC1  
ACTN1 COL17A1  
MEPCE RQCD1  
CRYAA CRYBB2  
SFN HDAC9  
AP2B1 SMURF1  
VHL SSR1  
GIPC1 MARS  
SCAMP1 EPS15  
APOB LIPH  
BAHD1 KRTAP4-12  
TBP RUVBL1  
KNG1 APP  
SGSM2 EGFR  
PRKCA RAC1  
DAND5 KIF1A  
YWHAG DISC1  
GNAI3 CXCR2  
MED14 MED26  
RPS4X DAXX  
MED7 MED8  
CDC42 FNBP1  
ZNF512B MBD1  
TFE3 MAP4K5  
NRIP1 CCDC85B  
SRSF7 RBBP6  
SGSM2 CA12  
FOS SRFBP1  
LCP2 TRAT1  
CCDC85B MOBKL3  
ARIH2 UBE2D4  
DAND5 SREBF2  
EPB41 FHL1  
WASL ITGA2  
PSME3 TAF1D  
RHOA OTUB1  
MT-ND4 MEF2D

STRN3 SLMAP  
ARNT NCOA7  
MED17 MED9  
PRKCA CISH  
SMARCA5 POLR1B  
NCAPD2 SMC4  
STRN4 ZRANB1  
TGFB1I1 AR  
EXOSC2 EXOSC6  
RECQL4 RECQL5  
CDKN1A RPS27A  
CFL1 ACTB  
TGFB1 DAXX  
SRP72 RPAP1  
BEND5 USP7  
TCERG1 SF3B4  
PARP1 NFKB1  
TCERG1 SF3A2  
PSMA3 FTSJ1  
CUL4A RFWD2  
THRA TAF11  
TNFRSF4 TNFRSF9  
THRA TAF7  
ELAVL3 RNF32  
RPS27AMARK1  
GIPC1 LHCGR  
PTPN4 ATRX  
DNAJB1 MAP3K3  
L1CAM NUMB  
BMI1 INSL6  
VIP PRICKLE1  
PSMD14 PRKAB1  
IPO4 ASF1B  
NFASC CRK  
RAD17 PCNA  
NSF STX5  
ARL6IP6 ARL6  
PEX5 SIRT3  
PRKCE BAX  
SNAI1 RPS27A

CTBP1 FOXP1  
RB1 POLA1  
AKIRIN2 LNX1  
ATM DCLRE1C  
NDUFA1 TRIM63  
MAPK6 C3ORF23  
CDC73 SYMPK  
RAC1 ARHGAP27  
VHL NR4A2  
NPM1 RARA  
ZNF764 MDFI  
UBE2U TRIM68  
SPP1 CTNBL1  
CAMKK2 WNK1  
NRIP1 CSE1L  
STK38 MYSM1  
CYP4F8DBNL  
NMI NECAP2  
MLH1 FCGBP  
CRYBA4 CRYBB1  
PTK2B PITPNM3  
MDM4 ATM  
DAND5 HCFC1  
PTK2B PITPNM2  
MET SPSB1  
SMAD7 STAMBPL1  
GFI1B LTBP4  
LRPPRC IKBKE  
RHOA ARHGAP5  
HNRNPC GRB2  
GRM2 GRASP  
RDX ABCC2  
MPL PTPN11  
NRIP1 NR1H2  
PRKCI GABARAPL1  
DAND5 MECP2  
PABPC4 PHLDA1  
PGR GNAI1  
DTNB C1ORF182  
PIK3R2 YWHAB

MSH2 EXO1  
YWHAZ TNS1  
SLC9A3R1 SLCO3A1  
TM4SF1 DNAJA1  
BIRC5 AURKB  
GRK5 DLGAP2  
MYC FASTKD2  
FBXW5 MDFI  
CNBP RPL31  
HLA-B AIMP1  
DHX9 WRN  
CDK4 SMAD2  
UBE2E1 ZNRF1  
MYOD1ID2  
FAM3A SLC2A4  
TCERG1 SF3A1  
BEND7 PLEKHF2  
CTNBL1 DDX21  
MRPS14 DDX56  
RELA USF2  
ANXA13 KIFC3  
ZBED1 NIP7  
RIPK1 CYLD  
MAP3K3 RUVBL1  
XRCC5 BIN1  
CBX5 ATRX  
SKIV2L GALNT13  
MEPCE ANP32B  
NR3C1 STAT5B  
MAPK13 ANKLE2  
CBLB BLNK  
IGFBP2 KLK2  
CHD1 BCLAF1  
BCAR1 VPS11  
TRIM25 TFG  
DCAF6 WNK1  
IL2RB EIF3B  
SHC1 DOK1  
EIF4G1 TRAF6  
ROS1 PTPN1

DHX29 PISD  
TERF2 PRMT1  
MAP3K3 CFL2  
ACVR1 RASL12  
MAPK6 RIBC1  
DBN1 HOMER2  
HLA-B TRAP1  
NUCB1 NDN  
NCOA6 NCOR2  
CUTA MLH1  
TRIM37 APTX  
TCAP MYOZ1  
CAPN1 SPTAN1  
YIPF6 YIPF2  
CCDC99 KIAA1377  
S100A9 PAK7  
RAD21 PDS5B  
STRN PPP2CB  
EGFR PTPRJ  
SPTBN1 TRAF3IP1  
XPA ERCC6  
CHD3 SDCCAG3  
DNM1 MYO1E  
TFEB TFE3  
MCM3 CDC5L  
BACE1 NCSTN  
UBE2K RNF2  
ESR1 RXRA  
HLA-A MAGEA1  
ZEB2 COPS6  
YWHAZ HNRNPU  
PRKDC PRKCD  
UBE2N PRKAB1  
FZR1 TPX2  
FYN BCL3  
GRM1 HOMER2  
BRCA1 CASP3  
THRB NCOA6  
MAP3K3 C14ORF166  
ATN1 RUNX1T1

SMARCA1 H3F3B  
WBP4 SF1  
CIDEA UCP1  
TPT1 CHFR  
UBE2D3 RING1  
NEFM NR4A2  
MAP3K3 RUVBL2  
DNM1 KIAA1377  
EIF4A3 SRRM2  
CD4 RPS27A  
MYST2 PHF17  
HLA-A MAGEA4  
ELK4 BRCA1  
MCM10IKBKG  
PDPK1 PRKACA  
MCM2 DDA1  
GABARAP ANKFY1  
ZBTB16TOLLIP  
ESD MCC  
EGFR EPS8  
COPS2 GPS1  
NKX3-2RBBP7  
GABARAPL1 UBA5  
RAB11FIP2 REPS1  
SCG5 UBQLN4  
PRKCA GNA15  
TCF4 GTF3C5  
MYST2 CDT1  
EIF2S3 IKBKE  
KIAA1967 GSTK1  
CBL VAV2  
SPI1 TBP  
DYNLL2 GPHN  
NFKBIA SUMO1  
NFKBIA DYNLL1  
PDIA3 TAP1  
DVL2 USP5  
AMOT MPP7  
TRMT11 TP63  
SF3A2 C16ORF80



GABARAP PKP4  
ATRX HIST1H3J  
APP CASP6  
NCOR1 ETS2  
EIF3I CLEC4G  
CCDC85B DUSP13  
YWHAZ CENPJ  
CDK1 CCNF  
TP53 ATR  
RELA PIAS3  
FDFT1 C1ORF168  
HSF1 SIRT1  
AVPR2 C1QTNF1  
BUB1 EIF4EBP1  
PSMD14 TRAF6  
BUB1 HDAC1  
DVL2 AP2M1  
MAGEB2 QRICH2  
GABARAP VPS28  
AR GTF2F1  
AP2A1 TRAF6  
TP53 PIN1  
GEMIN6 STRAP  
HIP1 AP2A1  
EIF2B2 EIF2B5  
SFPQ HDAC1  
COPA DDA1  
DAND5 MEF2C  
ARF1P1 WBP11  
SHPRH LPP  
ACTA1 PCYT1B  
HDAC1 NKX3-1  
EGFR BMX  
HIC1 TCF7L2  
MAPK14 DUSP16  
TFF1 PTRF  
EP300 KLF13  
LAMA2DAG1  
EPOR MST1R  
DTNB BEGAIN

CSN2 UBE2I  
GFER BNIPL  
ATG12 DDX58  
MAP3K10 LARP6  
ATN1 RNF31  
EGFR ZAP70  
PPFIBP2 DTNB  
NAA38 MTHFR  
EGFR SYK  
KCNH4 BRCA1  
STAT1 MTOR  
DEGS1 RADIL  
MAPK8 FADD  
RPS6KA1 CARHSP1  
MYCBP2 USP11  
THRB TRIP12  
ACTL6A INGX  
ATG12 SUN2  
HOXB3 EP300  
AP3B1 KIF3A  
E2F3 CCNA2  
SLC9A3R1 P2RY1  
AGRN APP  
ITGA2 COL8A1  
IMMT SDHAF2  
STATH MUC5B  
MAPK6 CEP110  
SFPQ PIN1  
MYD88 TLR7  
NR3C1 ALDH5A1  
DCX CDK5  
MED9 MED13  
PLSCR1HOXB6  
LCK SKAP1  
RASSF5RASSF4  
ZNF512B FAM129B  
CSF2 CSF2RB  
BRD4 CDK8  
WNT4 SFRP1  
ACTA1 FHOD1

SRSF1 TNPO3  
ABI1 BAIAP2  
EIF1B RPL22  
YWHAB ZNF395  
PRKAR1A UBE2I  
SKIL SMAD4  
PPBP CSNK2A1  
RBP1 HDAC1  
MAFG PAX6  
TFCP2 HECTD1  
SKP2 FZR1  
YWHAH KCNK9  
SHBG PSTPIP2  
HDAC1 ZFPM2  
USF2 WNK1  
ACVR1 NKIRAS1  
APC WNK1  
RASGRF1 PPP1R9B  
PSMD6 PSMD13  
CCR5 PTK2  
DDX17 WBP11  
YWHAH PARD6A  
ACVRL1 SNX6  
MAP4K4 KRT18  
MAP2K1 TRAF6  
LIMS2 HIPK3  
MSN RHOA  
CAPZA2 CAPZA3  
FYN CDH1  
EEF1D MAPK6  
S100A4 ACTA1  
PHB USP9X  
EPB49 PTOV1  
NFASC CNTNAP1  
IAPP PDX1  
AXIN1 DAXX  
UBA52 MAP3K3  
PRKCB CHAT  
UBE2M UBA3  
ABL1 YWHAH

TGFB1 SMAD3  
BACH1 BARD1  
FLNC USP25  
CPE POLDIP2  
FAM107A KRTAP4-12  
AP2A1 RNPS1  
CAV1 TRAF6  
SPOP BMI1  
FOS GTF2F2  
DLG4 LRFN1  
HNRNPC CNBP  
BCAR3 NOSIP  
PEX7 PEX5  
PIK3CAPIK3R3  
GDI2 RAB11A  
MASP1 FCN2  
HAP1 MRPS9  
DYNLL1 BCL2L1  
MAPK9 MAPK8IP1  
GDF5 CHRDL2  
CCDC88A PRKAB1  
CFLAR MAP2K4  
CSNK2A1 FKBP3  
CUL2 DLG3  
MAPK14 SCN8A  
RBL1 DHX30  
GRIN2D INA  
RB1 PHB  
GXYLT1 TRAF6  
CXCR3 CCL11  
ARNT NPAS4  
C1ORF190 THAP7  
HTN3 MUC7  
MID1 NFYC  
PPP2R1A HUNK  
TUBB4 TRAF2  
SRC CCND1  
CSNK2B RNPS1  
CDK1 PCNA  
FAM178A OPTN

H2AFX TDP1  
EXOSC6 RAB3GAP2  
PRKAR1B WNK1  
C5ORF13 IGSF21  
IKBKAP HTT  
CBX7 PCGF6  
GSK3A LRSAM1  
ACTB STAG1  
LYL1 LMO2  
HIST1H1C CTNNB1  
GBAS PGK1  
CELF2 GRB2  
NPDC1 KRTAP4-12  
RAF1 CNKSR1  
ARF6 ZNF709  
AR CASP3  
RIMS1 RAB37  
CD2BP2 DCD  
BAP1 UBE2O  
RGS2 PARK2  
PPP1R8 MELK  
SRC GJA1  
EXOSC10 RUVBL2  
CSK SLC6A20  
PPP1R2 CDK5  
SGTA FTSJ1  
MYST2 MCM2  
ITK BLNK  
C2ORF44 RUVBL1  
GEM RNF7  
TDP2 UBE2I  
TIA1 TOB1  
ABLIM1 LDOC1  
MBP PRKCA  
CASP3 HTT  
TPM1 CNN1  
MDM4 SMAD4  
FLNC RASSF5  
IKBKB TUBA3C  
FGF7 FGFR3

LGALS4 KIAA1549  
RPL5 YWHAZ  
MYOD1MEF2A  
WASL VIPR1  
FGR SLAMF1  
TCF4 ASCL1  
SAP18 YWHAG  
PTPRE MAPK1  
RAC1 ARHGEF2  
ACVR1 RAB6B  
PRPF40A FN1  
DAND5 CSNK2A1  
HSPA1B CACNA1E  
ATXN1 ZBTB32  
SLC7A9HNRPLL  
MED1 GATA6  
MAP4K4 PPARG  
NFE2L2CHD6  
ACTN1 FXN  
EIF4G1 PDCD4  
YES1 RPL10  
CCL5 CCR5  
ATM TAOK3  
PLCG1 AGAP2  
KCNJ11KCNJ8  
ERC2 PPFIA3  
CCL5 CCR3  
SORBS3 ADAMTSL4  
LHX3 IFT172  
PSMF1 DVL3  
CCL5 CCR4  
PLSCR1BACE1  
UBE2E2 RNF14  
FLOT1 SORBS2  
PPP1CAAKAP9  
KIF1B STARD13  
PPP1R12A IL16  
POU1F1CREBBP  
PDGFRB SRC  
SMAD1 FBXL12

CSNK2A1 HSF1  
HSPA4 SERP1  
CACNA1B RIMS1  
SMAD3 E2F4  
PTPRN2 UBQLN4  
CDK2 COIL  
TBL3 USP11  
CDK4 SETDB1  
HNRNPA1 HNRNPM  
TCEAL1 FEM1C  
LNK2 UBE2T  
SNRPD3 WDR77  
NOTCH2NL UBQLN4  
GLI2 SUFU  
RBX1 DDB1  
EIF4G1 PRKAB1  
HGS SMAD3  
ATF2 MRE11A  
CDK4 PPP2R1B  
CUL1 ZC3HC1  
CCT7 STK24  
NUP153 SENP2  
UMPS PAXIP1  
IKBKB CSF2RA  
MLLT3 INSL6  
MCM5 YWHAG  
MTA2 ESR1  
TFAP2B CITED4  
CAPS KIAA1549  
KCNK3 YWHAG  
TNIP1 TTF2  
GRB2 KIAA0430  
PLAU SERPINA5  
MAPK8 MAP3K1  
MYC CPSF1  
N4BP2 TOLLIP  
EIF3D SRC  
ERBB2 SHC2  
EP300 SIRT1  
ZNF354A DYNLL1

GRB2 AGER  
LRPAP1 LRP1B  
PPP2R2A STRN3  
APLP1 TOE1  
CDKN2A ATG5  
SNX3 SRC  
SIRT2 KRT78  
NECAB2 LNX1  
YAP1 DENND3  
HBP1 EWSR1  
UBE2I RAD54B  
LAMA1 ITGA1  
NONO SMARCC1  
USP8 RNF128  
HMGB1 RELA  
BMPR1B PPP2CA  
MEIS1 PKNOX1  
IL7R STAT5B  
SAFB2 GABARAPL1  
MMP2 COL18A1  
JAK1 IL4R  
ALDOA OSBPL10  
BCOR KDM2B  
GPRIN2 TRIP13  
EIF2B1 PDIA4  
PAICS NIF3L1  
DDX27 PPP1R16A  
CHRN1 COPS6  
NAPA GNA12  
RAP1A RALGDS  
NR2C2 JAZF1  
RAE1 ARMC8  
CYBA NCF2  
PRKCSH CANX  
GRB2 MAP4K5  
GFI1B BEND5  
GRN CRKL  
CFTR CANX  
SPRY3 TESK1  
PDCD6IP MAP1LC3C



MAP2K7      MAPK9  
SSR1   UTP14A  
MAP2K7      MAPK8  
AR      IDE  
HRAS   ABL2  
TP53   SETD2  
PINX1   MCRS1  
CAV2   CAV1  
TCF21   GTF3C5  
PPP1R3D      YWHAZ  
PSMD12      TRAF6  
CAPN1   ACTN2  
ERG      FLI1  
DOM3Z   XRN1  
PLAU   SERPINB2  
PLAU   SERPINE1  
MDM2   PTK2  
FOSB   CREBBP  
ACTN1   PKN1  
CFDP1   EWSR1  
PRKCB   SDC2  
TP53   CHD8  
RFC1   MLH1  
ITGB3BP      USP33  
MEF2C   GOLGA2  
CCDC22      CPNE4  
SF3A1   MAP1LC3C  
IGF1R   PTPN1  
GC      INSL6  
PPP2CB   STRN3  
FSTL3   ADAM8  
FADD   RALBP1  
WIZ      CTBP1  
TP63   EIF2C1  
TSPAN4      CD81  
PIK3R1   BRCA1  
BACH1   PARK2  
PUM1   CNOT8  
TCP1   CCT6A  
SIVA1   S1PR4

DNM2 SH3BP4  
NUP214NUP107  
WDR33 SH3GL3  
BAI2 LRP2BP  
PRC1 DAXX  
IFNAR1IFNAR2  
GRB2 SNX17  
SUPT5H SUPT4H1  
EIF3G EIF3A  
FAS FASLG  
MYC ACP2  
TP53 PRKCA  
LRRN1 RBBP6  
SCN5A DLG3  
FOS TBP  
RABGGTB RAB1A  
HDAC3 HSPA4  
SKI SMAD3  
FYN FASLG  
PTPN13MKNK1  
PIAS4 COLEC11  
PAFAH1B1 TUBA1A  
CENPA WTAP  
MBD4 SIN3A  
SMC6 ALK  
POLR1A TAF13  
ZMYND11 EZH1  
ATXN1 R3HDM2  
RRAS2 ARHGEF2  
USP49 MED17  
CDK5 AATK  
HNRNPM IKBKE  
ETS1 C17ORF62  
RXRA TBP  
KIAA1967 NEK6  
RBX1 ABTB2  
CFL1 ROCK1  
CDC42 FILIP1  
GH1 U2AF2  
VAV2 SNW1

WT1 UBE2I  
GADD45G PPARA  
VHL CYCS  
MUC2 GALNT14  
CEBPB STAT6  
HSPA1B NOD1  
CEBPB STAT5A  
VHL LSM12  
CXCL10 CCR3  
HSPB3 NELF  
SRY SLC9A3R2  
SMAD1 ZDHHC3  
FN1 LTBP1  
UBE2I MAP3K1  
NFYB CNTN2  
RPS6KA2 PSD3  
TRIM23BAG1  
OGT HCFC1  
RAC1 MCF2L  
IKBKE IRF3  
CEP72 SPATA2  
NCOR1 EMD  
CD82 CANX  
ZNF232 NR2E3  
TFAP2A DEK  
MLL2 PAXIP1  
ZNF335 ASH2L  
CTNNA1 TJP2  
DEGS1 SLC16A1  
HSPA4 RPS27A  
SMARCA4 RAP1A  
TRPC1 ITPR1  
GPX4 OTUD5  
STAT1 STAT5A  
SLC24A1 NCK1  
ATN1 MAP7D1  
CTNNB1 NF2  
UNC119 LAMA4  
CORO2A TBL1XR1  
TXK LCP2

AKAP4 FSIP1  
MB PSMD4  
SIN3B ARID4A  
PRKACA HDAC1  
CSTA LOR  
ADRB2 KCNJ9  
DVL1 CSNK2A1  
FURIN SERPINB8  
MLH1 RAD23B  
JAK2 CTLA4  
PAK1 PCM1  
IL12B IL12RB2  
NBL1 UBQLN1  
ADAMTSL4 NTN4  
MAPK8 GATAD2B  
RPA3 ERCC6L  
MNAT1 MTA1  
HSP90AB1 PTK2  
NOS2 CAV1  
THRA LGALS12  
YES1 OCLN  
USP36 ANKRD33  
VAV1 EPOR  
SNRPB GEMIN7  
NR4A2 SIN3A  
BLM PAXIP1  
IVL DSPP  
PRKACA KCNQ1  
ACTA1 DTNA  
HIST1H4I NCOA3  
UBE2G2 RNF146  
SOCS3 PIN1  
PTPN6 NOS1  
SMAD7 SOX5  
SUMO2 RERE  
ATN1 NELL1  
SERPINA5 THBD  
MED14 MED28  
KRTAP4-12 CHIC2  
GRB2 SLC6A20

FBL PSMB6  
CUL1 NFKBIB  
GRB2 ACAP1  
YWHAZ KLC3  
PTPN13 PDCD10  
CASP9 MAP2K1  
HLA-B MARS  
TAB2 RUVBL1  
MYCBP2 PAK1  
GRIN2D CRK  
SEC22BSTX5  
CCNK PIN1  
FYN WASF1  
NFIB RFX1  
ABL1 RIMS1  
VAV2 MED21  
GABARAP DYX1C1  
CREB3 CCR1  
SIN3A MNT  
GRB2 PRKAB1  
VIM COPS6  
ITGB2 ICAM4  
RPL11 NFKB2  
CTNNB1 CSNK2B  
SERPING1 C1S  
PMS1 NONO  
TUBA4A ASCL2  
EIF4A3 YWHAZ  
LAMA4 COPS6  
PCNA ERCC5  
PEX5 ATM  
CD58 HERPUD1  
KIT GRB10  
EFNA5 EPHA7  
MAGI3 DSCAML1  
IRF1 SMARCA4  
EGFR ANXA1  
FURIN DDX56  
COL6A3 PLCG1  
INSR STAT5A

FBP1 C14ORF135  
COPS5 KLHL9  
DAND5 TBX21  
PSME3 BBS2  
EGF ADRBK1  
ANKRD17 BAP1  
JAK2 PRLR  
JAK2 TSHR  
EGFR ALDOA  
FBLN2 HSPG2  
KHDRBS1 RAPSN  
BCL9 PYGO2  
GATA1 ZBTB16  
TSPAN4 CLDN11  
CUL1 CAND1  
SMYD1 HDAC2  
EIF3E EIF4ENIF1  
S100B PGM1  
GRB2 PYGO1  
SGK1 EIF3I  
CDK2 FOXM1  
CBX4 SUV39H1  
XRCC2 BLM  
VHL ATXN2  
CEBPG CREB3L3  
IKBKE LAGE3  
STRN MOBKL3  
USP15 MYH4  
SUMO2 RCOR3  
SFN LMO7  
DYNC1H1 C20ORF24  
XPNPEP1 DISC1  
MED13L MED13  
BCAR3 KIF5B  
NPY GHRL  
UBA1 TSSC4  
TAB2 RUVBL2  
NEFL TSC1  
MYOG ID2  
TRIM24TAF1B

HSPA4 IKBKG  
ANKRD12 MKNK1  
CARS PACSIN2  
IRF1 RELA  
GSK3B PPARGC1A  
EMD SYNE1  
DDX17 SRA1  
AP2B1 MEA1  
PDPK1 SRC  
NDEL1 MRC2  
RAP1GAP2 WNK1  
MAP1B ACTB  
CHRM3 MDM2  
GTF2I PHF21A  
HR HDAC2  
GORASP2 NQO2  
SKAP2 PRAM1  
FBL MYO1A  
NOL3 ETNK2  
MLH1 FAN1  
ACTB CPNE1  
SNAP23NAPA  
FBXW7 LINGO1  
ORC2 CDC6  
TK2 INSL6  
COPS5 KLHL13  
ERBB2 MUC4  
RB1 RFC1  
MCF2 RDX  
PTP4A3 GEMIN4  
NCOA3 CARM1  
CTNNA1 RNF219  
TUBB YWHAB  
ZFP36 DCP2  
TBX3 HDAC5  
GRB2 KIF3A  
CASP7 PTGES3  
SERPINA5 KLK3  
BRIX1 CDC42BPB  
GAS2 ACTA1

SPI1 ATF1  
TOB1 SETDB1  
USP19 HMOX2  
ATP6V1G2 ATP6V1E1  
POMC VTN  
KBTBD7 TMEM160  
EIF2AK2 PTGES3  
AURKANUF2  
H2AFZ ACTR6  
NFKBIA HSPA1L  
NFKBIA HSPA4  
PARP1 IMMT  
DST COL17A1  
SNCA ADAP2  
PABPC1 PAIP1  
IGF1R CSK  
OXSR1 SMURF1  
MAPK1 DUSP6  
MAPK1 DUSP7  
ARHGDI1 ST3GAL4  
STAT1 TRADD  
CDC7 ORC5  
NR3C1 MSX2  
PRKCA GRM7  
SYN1 PAK2  
HNRNPA2B1 MAPK6  
TGFB2 SNX6  
WAS NCKIPSD  
CYP3A4 AMFR  
SNIP1 ZNF451  
PEX11BPEX19  
ERBB4 YAP1  
NCK1 CSNK1G2  
PRMT5 ZNF224  
ZW10 RINT1  
HCFC1 HDAC2  
IKBKAP CDKN2B  
TCERG1 SF1  
FYN SH3BP2  
MXD1 SIN3A



SLC9A3R1 YAP1  
VEGFA GPC1  
NFATC1 SPI1  
USP12 WDR48  
SYN1 PAK1  
PARN SUMO2  
RPS27ARB  
FADD MOBKL3  
MUM1 BATF  
SACS TSC22D4  
FYN PRKCH  
NCK1 CNTNAP1  
CDK1 VIM  
APC LNX1  
SOS2 MAGI2  
APC NAV2  
APC NAV3  
UBE2L6 TRIM27  
FYN CYP4F2  
ZNF512B VPS35  
SNAP29EHD1  
CCNE1 RBL1  
LNPEP FHOD1  
TUBG1 PIK3R1  
MIP GJA8  
SHC1 MST1R  
ABI1 EPS8L2  
APC2 ANAPC1  
TRIM24CBX3  
YWHAQ EDC3  
CCNA2 CALM2  
PRKCA GNB2L1  
CSN1S1 STK4  
PSMA4 TRAF6  
NTF3 NTRK3  
PPP6C PPP6R1  
HTRA3 MLH1  
PCBP3 RUVBL1  
APC NOSTRIN  
WAS ITSN2

PDHB MCC  
ATG12 TECPR1  
NFKBIB NFKB2  
USP15 LSM4  
FYN RPP38  
AP2A1 RIT1  
CLTC LDLRAP1  
STAT1 TMF1  
STAT3 NMI  
NUP98 EP300  
CCR7 CCL19  
ZNF165 EWSR1  
CPSF4 FIP1L1  
UBE2U MUL1  
NUP62 HSF2  
ACTA1 TLN1  
ITM2C RNF7  
ORC3 CD8A  
ORC3 CD4  
FYN DLG4  
FYN CNTNAP1  
VARS TNFRSF10D  
PSTPIP1 DNM2  
PVR CD226  
ILK PARVA  
EZR TSC1  
DAND5 NCL  
NEB CAPZA1  
EIF2AK2 PPP2R5A  
MAP3K7 MAVS  
USP11 RELB  
NCOR1 DAND5  
RPF1 CBLB  
NUP62 XPO6  
PHF17 ING5  
TRIM22RERE  
GTF2F2 TCEA1  
S100A1 ACTA1  
CTSB ADAMTSL4  
PLG RUVBL1

EXOSC10 LSM2  
PRKCA PLCB1  
CALCOCO2 PEF1  
GRB2 RNF10  
IRS4 CRK  
IRS4 CRKL  
PCNT PSMD4  
ASAP2 SREBF2  
HSP90AA1 GNA12  
CDC20 ANAPC7  
CSNK2A2 CTDP1  
G3BP2 ING4  
EEF1A1 TOPORS  
SUPT7LPTN  
RPS14 SMYD2  
PCBD1 ARX  
APC NUP54  
ITGA2BCD36  
TP53 MDM2  
STAT6 DAZAP2  
LRRC7 CNKSR2  
NID1 FBLN1  
SOS1 ITSN1  
SIN3A HDAC7  
SMAD9 SPTBN1  
CDK8 MED15  
YAP1 YWHAG  
NFKB1 IRF9  
HRAS BRAP  
C2ORF44 MED31  
SMAD3 SRY  
PCBP3 RUVBL2  
PTK2B GNA13  
GPRIN2 YWHAE  
PIK3CASQSTM1  
EYA3 SIX4  
SRRM1 NCOA5  
IRS1 BCL2L1  
EEF1A1 UBQLN4  
IGF2R TRAF6

FES IL4R  
AGT GRB2  
CSNK2A1 ACCN3  
TNFSF14 LTBR  
MAPK9 MACF1  
GAP43 SPTAN1  
NAV2 ING5  
VHL TIMM17A  
XRCC1 PNKP  
PSMB1 DSTYK  
PCP2 COL7A1  
PTPRZ1 ALK  
CALCOCO2 APEX2  
PIK3CA ATR  
HERPUD1 UBQLN4  
VIM ZNF384  
DYX1C1 GABARAPL1  
CUBN GC  
KHDRBS3 CCDC33  
DDIT3 CSNK2A1  
GPS1 COPS3  
FLG PCSK6  
EIF2S2 EIF5  
FANCA TAF10  
POLR1A NFKBIB  
KCNQ3 KCNQ2  
CKMT2 INSL6  
NCK1 RPP38  
PLK1 IKBKG  
RAP1A FAF1  
SYT1 GOLM1  
YTHDC2 LYAR  
CXCR4 PTPN11  
CUBN TF  
THRA MED16  
ZRANB2 RAPGEF2  
SPAG9 ARF6  
TLR3 SRC  
DAZAP2 C10RF94  
TPD52L1 HDAC1

FN1 COL7A1  
MAPK9 MAPK8IP3  
CUL4A TOR1AIP2  
SYNJ2 GRB2  
CASP3 SPTAN1  
MAPK14 ARHGAP9  
CDC42 SRGAP1  
AR PRDX1  
GLIS2 WNK1  
CCDC85B NDUFA5  
EPPK1 NFKB2  
TIMP1 CD63  
NOTCH2 MAML1  
ERCC2 ERCC5  
PLG MMP7  
ITGAV ITGB8  
GSK3B DPYSL2  
ABCA1 XPC  
NCK1 CYP4F2  
HTRA2 BIRC6  
TMPO SUMO2  
APC PUM2  
PPFIA1 PTPRS  
MYCBP2 WNK1  
RHOG ARHGDIG  
FAM175B SMURF2  
PLEKHA5 MACF1  
NSF EIF3E  
BCL2L1BIK  
CTNNB1 ANP32A  
PRKAB2 PRKAB1  
ATP5C1GDPD2  
LIMK1 RPS27A  
MAX SETX  
RAP2B RALGDS  
CUBN ALB  
STAT5A NCOR2  
PPP4R1 DISC1  
EXOSC10 DIS3  
LMX1B SSBP3

MYC HSP90AB1  
PGR STAT5B  
SGOL1 LRRC59  
PLK1 MAGED1  
POLR2E POLR1E  
HADHA PSMD4  
PML HDAC1  
GRAP2 KRTAP4-12  
WBP4 HNRNPK  
MGRN1 UBE2D4  
DCTN1 DST  
DDX3X C20ORF24  
CDC25B YWHAH  
PINX1 BVES  
EIF2AK2 NFKBIA  
MOCS3 EXOSC6  
PRPF6 SMARCA2  
MED30 EHMT2  
BAX BCL2L2  
PRKCA PDLIM7  
HSPA5 APC  
CC2D1A CHMP4C  
COPS6 FBXO17  
TP53 DPH1  
F12 APP  
ZBTB43 TCEB3B  
ABL1 AHSG  
ABL1 NFKBIA  
ICAM1 SPN  
TP53 PML  
NFASC SCN3B  
PIK3CADGKZ  
CPE MED31  
DGKE NUF2  
APC FBXO30  
SRPK1 IKBKG  
PTPRC TYK2  
TP63 EIF2C2  
SIVA1 GRINL1A  
KLF10 SIN3A

TLR4 IRAK1  
STAM2 UBQLN4  
RANBP9 C20ORF11  
HNF4A MED23  
VAV1 PLCG1  
SIKE1 PDCD10  
ACTB BCL7C  
PIGH PIGQ  
CBFA2T2 CBF3  
EIF3A SS18  
DNAJB2 RPS27A  
HDAC3 NFKB1  
TTC19 UPF3B  
TRPC1 ITPR2  
TP53 GTPBP4  
TJP1 GJA3  
TRPC1 ITPR3  
SLC9A3LRP2  
PSMB1 PSMB8  
XPOT CLN3  
HIST1H3J ASH2L  
NQO2 RHOB  
RTCD1 HLA-B  
SMAD1 BTBD2  
LSM6 USP4  
ZRANB2 TRA2B  
CAPN1 GRIN2B  
MDM2 TUBB2A  
FXD3 NR4A1  
UBE2U TRIM46  
HNRNP3 GSTK1  
ATRX SMC1A  
PTPN6 SOS1  
NBN MSH6  
REL TNIP2  
IRAK1 BTK  
ITGB7 AIDA  
IGF2 IGFBP3  
TGFB1 PPP3CC  
KLF6 NUFIP1

RAB11FIP3 RACGAP1  
MAPK8 MAPK8IP3  
PBRM1 ZNF512B  
ESRRG NR0B2  
PLK1 GTF3C3  
MCC NASP  
NCK1 WASF1  
CFTR EZR  
ZZEF1 HSPB3  
NXPH1 NRXN1  
EWSR1 PTK2B  
PRMT5 SMARCE1  
CDC42 FGD1  
PKIG KPTN  
SKIL PAPP  
MAPK8 MAPK8IP2  
KIAA0415 YWHAB  
PTPN6 TYK2  
DLG4 DLGAP2  
CAV1 NEDD8  
HLA-C B2M  
CAV1 GRK1  
COIL TCEB3B  
CD8A CD3D  
CACNA1F CABP4  
GSTZ1 NCK1  
BCL2L1MCL1  
PTPRS FEZ1  
RIPK1 RNF216  
AMPH CABIN1  
RPS19 IKBKE  
PLP2 PRKAB1  
RASSF7CHMP1B  
APC BCL2L1  
PML TDG  
CDC27 MAD2L2  
RUNDC3A AP1M1  
VIM MICAL1  
ITSN1 SMARCC2  
TDG SERBP1



BPNT1 TRAF6  
SH3BP2 SH3KBP1  
MRPS5 DDX56  
PDGFB HSPG2  
MRE11A RRM2B  
COL11A1 DDR1  
MAP2K4 TRIB1  
TAF1A TAF1D  
PRKCA PEBP1  
SMARCB1 CARM1  
PIK3CG USP45  
TMEM33 IKBKE  
ETV1 MAPK14  
STK25 MOBKL3  
SMAD2 POU2AF1  
TAF6 SMARCC2  
GLI3 SMAD3  
GRB2 GSTK1  
APIG1 CLTC  
KDM6A MLL3  
C4BPA BMPR2  
ATN1 GCC1  
MYO10 FBXW11  
CSK PTPN22  
USP7 TRAF4  
STRN MOBKL3  
GSTM4 ZBTB16  
FYN ACP1  
TP73 RPS27A  
RALBP1 HOOK2  
CRADDFAM190B  
FOS SUPT6H  
TLR1 DHX36  
GRB2 PTPN22  
CCT2 MOBKL3  
TSPAN4 CD9  
UBE2A UBR4  
NYNRIN AGTPBP1  
FGG VTN  
HMGN3 SMAD2

GRB2 POLR1D  
ACTB HNRNPAB  
CEP110 DAXX  
FAM190B NDEL1  
RAB3A RIMS1  
H2AFJ WDR77  
PLG TFPI2  
PPM1D MDM2  
GAST CCKBR  
MRAS MLLT4  
DPM1 TNFRSF14  
PRKCD PLSCR3  
EXOSC10 EXOSC1  
CASC3 UPF3B  
PSMA7 PSMA3  
PSMA7 PSMA4  
JAK2 NCK1  
HDAC4 TNFRSF14  
APC SIAH1  
UBE2U TRIM63  
LRAT RBP1  
SMAD9 CTR9  
SNRPD1 LSM10  
PHGDH MEPCE  
CREB1 TSSK4  
PFKFB2YWHAG  
NFKBIE PPP6C  
SIX1 DACH1  
SRC EP300  
KNG1 PLAUR  
VHL RNF139  
UBE2D1 TOPORS  
ELANE SDC1  
PAFAH1B3 COPS6  
UNC119 HMGB1  
CSDE1 PIK3R1  
KHDRBS1 PTK6  
SLC9A3R1 TRPC5  
AQP4 AP2M1  
YWHAQ MLLT4

PLCG1 LRIG3  
PAFAH1B3 CHMP7  
LGALS3 SUFU  
ATF3 BATF3  
RHOA FADD  
PIK3R3 MBIP  
BCAS2 ESR1  
MED24 MED10  
FOS SBF2  
TUBB SIRT2  
IGF2R EEA1  
RARA NR4A2  
PNPT1 TRAF6  
ABL1 CDK5  
BAG4 APOBEC1  
CASK KCNJ12  
EDN1 UBQLN4  
KIAA0182 HDAC2  
CIC SETD2  
S100A8 ASB3  
MED7 HNF4A  
ENO1 HDAC1  
HSPA4 CDC73  
RRAD YWHAZ  
CEP290 PRKCH  
PSMB9 PSMB7  
GATA1 MED17  
CENPB NR4A1  
SLC9A3R1 LHCGR  
VHL UBE2L3  
ESRRB NCOA2  
GRB2 THRAP3  
CKS2 TSC22D4  
TCERG1 NPM1  
SIVA1 GRINL1A  
PDGFRB SHC1  
SGCG FLNC  
PDGFRB PTPN6  
EWSR1 ITCH  
TERT CIB1

ARIH2 EML4  
XRCC2 RAD51  
RPS29 EIF4A2  
SYK HNRNPU  
CD81 RBBP6  
CEBPD HDAC4  
ARPC2 PHF5A  
BIN1 REPS2  
CALCOCO2 CPNE7  
F8 CALR  
HLA-B TRMT112  
ERBB2 IL6ST  
NANOS3 TXNDC11  
RPS23 MAP3K14  
NR4A1 MED1  
RGS3 YWHAZ  
ARPC2 CDH1  
KLF1 HDAC1  
ESR1 AHR  
SPI1 FUS  
SGCG SSPN  
AP3B1 ARF6  
PRDX1 IRF3  
SFN PARD3B  
PACSIN1 TRPV4  
ITPKA CALM2  
CD4 PIP  
SPN CTNNB1  
TBP HTT  
COPS2 CUL2  
OTX1 CHIC2  
SFN PARD3  
COPS2 CUL1  
COPS2 CUL4A  
GGN OAZ3  
CTBS FNBP1  
RAD23A MAST1  
SCUBE3 SCUBE1  
NR3C1 DAP3  
RNPS1 GEMIN4

FSHR ADRBK1  
LYL1 TAL1  
CRMP1 FUBP1  
HNRNPM TNPO1  
ARRB2 STK38  
UBE2D2 TRIM25  
MYB SP100  
CDK2 CHAF1B  
CDK2 CHAF1A  
BCAS2 BLK  
CDC42 EIF4G2  
SFN SHROOM3  
LMNA URB2  
LGALS4 KIAA1549  
ECHS1 ATG5  
UBC NFKBIA  
MAPK8 MAPK8IP1  
ATXN2 RAPGEF2  
PABPC1 SREK1  
EP300 JMY  
LAPTM5 HERC1  
PIR NFKBIA  
SNCA GRK1  
FANCA HSP90B1  
SLC11A2 NDFIP2  
RGS16 GNAQ  
NR3C1 PTGES3  
NF2 RALGDS  
HIST1H2BK CHD1L  
INSL6 NRBP1  
DAND5 PER3  
MYB ZMYND11  
FLNA STAT1  
VIP VIPR2  
PLK1 ANKRD44  
CDK8 TRRAP  
SAFB2 MAP1LC3C  
EWSR1 TONSL  
USP13 CYLD  
PGK1 HSPH1

C1QC PTX3  
SRC GNB2L1  
PHKG2 PHKG1  
ERBB2 TLN1  
FN1 AMBP  
GRIK5 DLG3  
EXOSC8 UPF2  
HTATSF1 SUPT4H1  
PRAF2 RHOB  
TRPC3 TRPC7  
MYBBP1A LYAR  
HSPA5 SUMO4  
ARID4A SIN3A  
NEDD8 ATG5  
SRPRB MAGED1  
PRKAR2A GNA13  
YWHAQ SSH1  
CDH1 FER  
RPA3 MCM2  
TSSK2 TSKS  
SMAD9 UBQLN1  
MAP2K3 MAPK12  
RNPS1 C19ORF29  
TGM2 HIST1H2BG  
RNF111 UBE2W  
SAP130 INGX  
GRIK5 MLF1  
TOR1A DHCR7  
CAMK1HDAC9  
SNX2 PDGFRB  
RUNX1T1 ABI3  
PRKCI MAP1LC3A  
C19ORF12 IKBKG  
AP2A1 L1CAM  
JAK2 PPIA  
RAMP2 CALCA  
AGR2 POM121  
SERINC3 XPO5  
AR ETS1  
C1QB C1QC

IKZF1 SMARCE1  
SRRM1 SMARCC2  
NSUN4 EWSR1  
CBL SPRY4  
GRB2 SIGLEC7  
VBP1 MAP3K3  
CD3D HERPUD1  
VAMP7 SNAP25  
CEP110 CEP97  
BCL6 MTA3  
CD22 INPP5D  
XRCC5 WRN  
KDELR1 ARFGAP1  
ARF1P1 ARFGAP1  
EIF2S2 EIF2B4  
SMAD3 JPH3  
SHOX2 TRIM29  
SRC BMX  
GTF2I OTUB2  
NFKB1 NFKB2  
SH3BP4 GIPC1  
MSX1 SUMO1  
FHL3 MED15  
TROAP BYSL  
XRCC6 TCF7L2  
PCNA CDT1  
PSMD1 BAG1  
MED1 ESR2  
MAPK9 TRAF2  
HAX1 IL1A  
LAMA5 SMAD2  
GRB2 DLGAP4  
ACTA1 KLHL20  
YWHAE TAF7  
CTNND1 EGFR  
SUV39H1 RARA  
SRF CREBBP  
CDK9 CUL1  
EIF3F UBC  
CKM MYOM2

SS18L1 MED30  
HSP90AA1 TRAF2  
KCNMB1 CLCA1  
AGT DNPEP  
EDC4 DCP2  
WBP4 EWSR1  
GRB2 CDR2L  
PCNA CCND1  
DHX15 PIN1  
LGALS3BP IKBKE  
NEDD8 DDB1  
BIRC2 ADRM1  
NCK1 PAX7  
WDR5 MYST3  
RAB3GAP1 FEZ1  
A2M SHBG  
FYN ITCH  
MAPK1 SREBF2  
KIAA0182 CEP63  
RGS20 MLF2  
IGF1R RASA1  
FAT1 HDAC6  
PRMT5 YWHAQ  
CHD7 NLK  
STRN TRAF3IP3  
ARNTL NPAS2  
PPP4C CCDC6  
PIAS1 MBD1  
THY1 ITGAV  
VHL PFDN5  
NCK1 PAX3  
CFH GRB2  
ARF1P1 CYTH1  
GRB2 ERBB4  
SLC1A2JUB  
DZIP3 AKTIP  
SNRPB2 SRRM1  
SUMO2 SENP1  
PRKACA PDE3B  
TGFA GORASP2



GRB2 PALM2  
NUP155 KBTBD7  
SLFN11 RPAP1  
IDH3A DDA1  
MAPK9 NFATC3  
LSM2 USP15  
KEAP1 TMEM160  
CSN2 CELA1  
RANBP9 HIPK2  
PARP1 CHD1L  
EYA3 DACH1  
KRT20 CCDC85B  
VEGFA SEMA3F  
STAT1 GSTK1  
COIL ZNF277  
MLH1 FBXO32  
DBN1 RIPK3  
MEF2D RBBP5  
SIRPA CD47  
GNL3 PHLDA3  
SFN SAMD4A  
CCNT1 HIC2  
CDC7 MCM3  
SRSF2 SRRM1  
RPAP2 INTS1  
TTF2 TACC3  
PTGIR GNAQ  
DDX1 SRRM2  
PPP1CAMAP3K3  
CDK1 STMN2  
GRB2 C16ORF7  
PRNP HSPD1  
PPP2R5C CCNG2  
HSPA5 DNAJB11  
ATM DDX1  
CD4 BTRC  
KIF5B TNFRSF10D  
DNAJB6 TP53  
FADD PEA15  
UBE2D3 RNF185

MAPK8 NFATC2  
POLA1 CDK2  
ATG12 ATG7  
SMURF2 PARD6A  
CATSPER1 CHIC2  
LAMP1 AP1M1  
PRPF3 USP15  
RELA KDM2A  
MDFI THEG  
TNFSF14 LTB  
IL33 HIST1H2AL  
F8 CANX  
FIGF KDR  
KIF5B CDC5L  
BCL6 HDAC5  
RPL10 MAP3K14  
HSP90AB1 DDX24  
GPS1 CARD11  
HLA-B SRP68  
FLNA CALCR  
ATN1 ZNF608  
MYBL2 LIN9  
UBE2I MKRN3  
TJP1 F11R  
GIPC1 SDC4  
ZNF521 LYST  
STAU1 PPP1R7  
MID1IP1 SUFU  
TCF4 NEUROD1  
SNAP29AP2A1  
RPL31 PINX1  
CCT7 RIPK3  
LMNA MAX  
PGR NR0B1  
YWHAG LARP1  
SFN SRRM2  
SMAD3 CITED2  
SMAD1 EWSR1  
PLCG1 DOK1  
SREBF2KPNB1

NRD1 BTRC  
PTH MEP1A  
SKIV2L XRN1  
FXR2 CCDC85B  
MYC PIM1  
POU2F1PRKDC  
ATP2B4PPP3CA  
ABHD16A MLH1  
CUL5 COPS8  
RHOQ COPG  
ATF2 ATF3  
MAPK8 IRAK1  
HBXIP INSL6  
SMAP2 IKBKE  
GNG11 ZHX1  
HIST1H1D EP300  
STAM2 EGFR  
CSNK1D DVL3  
LSM6 LSM7  
MLH1 NT5C3L  
PPP1CAKIF13A  
PRKACB PITX2  
SAP30 HTT  
GOLT1A TNIK  
SLC25A6 STRN4  
RTN3 PLEKHF2  
TOM1 ZNF512B  
ABL1 RYBP  
PTK2B RB1CC1  
BRD4 PIK3R1  
GABARAP KBTBD7  
BEND7 NIF3L1  
MET DNAJA3  
PCNA INGX  
RARG RXRG  
CDC25C LZTS1  
FAR1 SMYD3  
FTH1 CRMP1  
CHRNA1 CHRNE  
PLSCR1NPDC1

STAT1 FRMD4B  
MCC CSNK1E  
TP53 DAND5  
AP1B1 SMAD2  
HCN1 HCN2  
MAX C11ORF63  
MAPK1 GORASP2  
GRB2 PTPRK  
TYK2 STAT2  
ZFYVE9 PML  
PTPRB CDH5  
AGR2 MUC2  
COPS2 COPS5  
WDR5 HIST1H3J  
THRA NCOR2  
C1QBP HNRNPD  
PRKACA KLF1  
MEN1 TP53  
TGFB1 FNTA  
MET CTTN  
PPARGC1B FOXA2  
MED26 SREBF1  
MYC FGFR1  
SNAPIN PRKACA  
NEDD8 ARX  
CPE RAPGEF2  
PRKCSH RGS2  
MED26 POLR2I  
ULK1 GABARAP  
HGS MAT2A  
ZBED1 SPEF1  
EIF3J EIF3B  
STAT5A ERBB4  
ACTN1 GRB2  
LYN DOK3  
POLR2E POLR2K  
GNAI3 CD59  
SMAD3 MAPK14  
YWHAB RADIL  
SF3B1 BAZ1B

TBL1X THRB  
MEAF6 ING4  
KCNJ4 DLG2  
MECP2 PRPF40B  
CUL1 NEDD8  
LCK PTPN22  
TPST1 CCR1  
PLCG1 BLNK  
PRSS1 PTPN4  
PLSCR1PRKCD  
CHEK2 PLK3  
ZMYND11 EP400  
ST7 MYOT  
LAMA1MEP1A  
PSPH IGF2BP1  
OFD1 FAM190B  
USH2A KRT18  
TJP1 CLDN16  
RAE1 POLR3H  
HOXA5 ZNF408  
PRKCSH ELF3  
HRAS PDGFB  
MYC TOP1  
CDK4 CDKN2A  
SCGB3A2 MARCO  
CDK4 CDKN2C  
MDM2 HDAC1  
CDK4 CDKN2B  
GAS7 NCKAP1L  
HSP90AA1 FANCC  
MET SHC1  
DLG2 FZD1  
USF1 ASH2L  
MEF2C SRFBP1  
OGT YES1  
PSMD6 TNIK  
POLR2E POLR2L  
RELA RUVBL2  
WDR5 NCOA6  
FURIN MMP14

TLE1 RPA2  
SYN1 PIK3R1  
RBPJ SND1  
EEF1A1NEU1  
UBE2U RNF144B  
MTNR1A TMEM33  
SLN ATP2A2  
STX7 VAMP8  
MCM3 CDC6  
GAB2 TNFRSF11A  
SUB1 POU2AF1  
TLX3 PQBP1  
KCNJ12MPP6  
HOXC9 ELAVL2  
CD5 CAMK2D  
CTNNA1 DGKD  
IFNAR2EP300  
CALCOCO2 DAXX  
PFKFB2AKT1  
TNNI2 TNNC1  
HLA-B SEC63  
FES EZR  
CLEC4G WBP2  
KRR1 USP33  
CDK5 MAP2K1  
WASL PTPN2  
ERC2 PPFIA4  
GDI2 ARF6  
ERC2 PPFIA2  
RIOK3 RUVBL2  
CTNNA1 CA9  
PABPC1 GSPT2  
ELMO1 DOCK2  
RELA RUVBL1  
LRIG3 NCAPG  
SOS1 ABI3  
ZSCAN30 ZNF496  
PTPRC PKP4  
HMGA1HIPK2  
FKBP4 ACVR1

CHEK1 HSP90AA1  
ACTR2 WASF1  
FGB NID1  
SYT17 NINL  
UBE2D3 OTUB1  
GRB2 POMP  
MBL2 CALCR  
EEF1A2MAP3K3  
FGFR4 STAT3  
TSN PRKAB1  
TRIP4 CREBBP  
RPS27AMXD1  
XPO1 MAPK6  
EP300 ELSBPB1  
PRKCB PDLIM7  
CCT4 PPP2R2C  
PIWIL2 DICER1  
MPHOSPH6 C14ORF1  
PYGM S100A1  
MYB RBBP5  
LSP1 ACTG1  
SEC61BSERP1  
DBC1 SIRT1  
SKP1 FBXO25  
NUDT21 RXRB  
CA2 SLC4A3  
EIF3F CSNK2A2  
JAK2 GRB2  
JAK2 FGFR1  
LMOD1 ACTB  
FGF7 FGFR4  
RALGDS RIN1  
DAND5 MYOG  
SFN HDAC7  
EPRS DUS2L  
PRKAR1B SMAD4  
SKIL UBE2I  
F11 TFPI2  
DAND5 MYOD1  
OLFM1 DISC1

HIP1 AP2B1  
KIT GRAP  
CCND1 CDK2  
CTCF CHD8  
LRRC68 PPP1CA  
DLG4 ARHGAP32  
PAK2 SH3RF1  
HDAC3 RXRA  
ATIC RADIL  
ATG16L1 CCT7  
EIF1B POLR2H  
RELA BTRC  
GLI2 FBXW11  
PACSIN1 PACSIN2  
SLC9A3R1 FZD4  
UBE2D3 RMND5B  
RPP40 BVES  
TSNAXIP1 TSNAX  
ZBTB16CEP72  
EFEMP2 RIBC2  
IPO5 MAP1LC3C  
UNKL SMARCD2  
BRCA1 STAT1  
TFAP2A CASP1  
KIAA0087 C2ORF18  
MOS FYN  
DNAJC6 AP2A2  
KCNH4 MAP2K3  
BRCA1 STAT5A  
HIST1H4I MSL3  
MAPK3 SREBF2  
ABL1 DLGAP2  
HSP90AB1 PRKCZ  
TRIM24THRA  
NID1 HSPG2  
MYST2 ZNF165  
ERBB3 PA2G4  
UBASH3A RPS27A  
PAK2 ARHGAP10  
ATN1 ZMYND8



LSM2 LSM4  
CASC3 STAU1  
RAB5A ALS2CL  
ZAP70 CRK  
TPST2 GPR1  
ARF1P1COPG  
DES PLEKHA5  
DES SMURF2  
SGK1 MAPK7  
HSPA5 REL  
LSM2 LSM5  
SNCA CDC42SE1  
MYOG ID3  
PRKCB PEBP1  
MCM2 GTF2B  
SYK CSF3R  
GRIN2B DLG2  
STAT1 LZTR1  
DLL1 NOTCH2  
RBM39 SF3A2  
STX7 VTI1B  
DUSP11SRSF9  
TFE3 CACYBP  
EGFR PITPNA  
THRA EMD  
TSC22D1 XPO7  
SUMO1 PLCL2  
TGFBR1 UBXN1  
NR4A1 NCOA1  
KCNA2 KCNAB2  
COL5A1 LGALS3BP  
CEP350 APTX  
GPC4 ACP5  
PRKACA DNAJC5  
YWHAQ NRIP1  
GNAI3 MTNR1A  
MEF2C MLL3  
RARA RFC4  
MPHOSPH6 ZHX1  
PARP1 RELA

GF11B USHBP1  
LRP6 ANTXR2  
SOCS1 JAK2  
GIP GIPR  
CEP110 AKAP9  
CBX7 USP11  
PIK3CAARHGEF1  
FAM131A PHYHIP  
EP300 NCOA3  
PPP1CACSRNP2  
KRT85 USPL1  
ASCC2 IGSF9  
PIK3CAUFD1L  
YWHAH MARK2  
HNRNPM TANK  
TDP2 SUMO1  
TCF4 CDC73  
EMD CDC37  
MAP1B MAP1LC3B  
YWHAG C1ORF114  
WDR47 TCEA2  
TEAD1 VGLL2  
ITGB5 PTK2  
MAPK1 TFCP2  
ATF7IP MACF1  
PARP1 HIF1A  
ARAP1 FGFR3  
PSMD10 PSMC3  
UBE2I ZNF451  
MAPK14 MKNK1  
TMED10 ARF1P1  
NR3C1 CENPB  
SRC SYN1  
DLG4 GNG13  
MYC DAND5  
BTBD8 WIPI2  
U2AF2 CHIC2  
SMARCA4 ARID1B  
HOXD10 PBX1  
DLGAP1 DLG4

PARP1 NRF1  
GRB2 DTX1  
RHOA ROCK1  
SFPQ TRAF1  
SGK3 ITCH  
SRFBP1 WNK1  
RELA TAF9  
CCNB1 RPS27A  
FLNC PHLDB2  
TBPL1 IRAK4  
CDK8 MED31  
EWSR1 SCMHI  
SDCBP SOX4  
MKRN3 UBE2W  
PARN C21ORF56  
KARS TANK  
HSP90AA1 EIF2AK3  
IFI35 NMI  
HAT1 YWHAZ  
INHBA ACVR1B  
IL1A IL1RAP  
KIT RFC1  
HLA-B TRIB3  
MMP2 FGFR1  
RB1 HMGB1  
CCDC85B PKN1  
IRS1 KHDRBS1  
MMP2 MMP17  
LRRC7 CAMK2A  
FGF3 EBNA1BP2  
AURKANIN  
OPRL1 RGS19  
TRIP4 ESR2  
IFNAR1 IFNA8  
EIF2AK2 PRKRIP1  
CTNNB1 PTPRO  
SLX4 MUS81  
FABP1 PPARG  
SRC PRKACA  
NCL ARRB2

SUV39H1 RUNX1  
COL1A2 TGFBI  
C1QBP TAB2  
PTK2B NEDD9  
ARHGDIB RHOA  
MAPK8 HDAC1  
GADD45G CDKN1A  
UBL4A NPLOC4  
CDK4 CCND3  
PDGFRB ADRBK1  
ITGB1BP1 LRP8  
RPF1 GRB10  
SSBP2 EWSR1  
CDK8 THRAP3  
ZNF225 EP300  
PIK3R1 DTNBP1  
COL3A1 SPARC  
EDN1 BAG6  
GH1 ECHS1  
MAPK3 LRPAP1  
WEE1 CSNK2A1  
CRYAB PSMD4  
VEGFA FLT1  
NFKB1 TSC22D3  
SLC7A9SREK1  
DDB1 DDA1  
EWSR1 RMND5B  
FCHSD2 HSP90AB1  
PRNP CLU  
TRAF2 KIAA1267  
NCOR1 DHX30  
NR3C1 ZBTB3  
TMBIM6 BCL2L1  
DZIP3 UBE2Z  
KIF5B KTN1  
APP PPID  
EPS15 SH3BP4  
SFN TNS4  
NPY MEP1B  
PPP2CBIKBKE

SKIL CDC16  
SPTB DAXX  
AURKAPML  
PLSCR1PLSCR4  
SFN TBL3  
SMAD1 RAB34  
CSNK1A1 ACTB  
CCR10 CCL28  
HSP90AA1 HSF1  
CRB1 PSMD13  
RAB7A RAB22A  
ERBB2 PTPN22  
GLI1 DYRK1A  
RPA2 EEF1A1  
HDAC3 BCOR  
ALDOAPSMD4  
ELAVL1 ANP32B  
PSMD12 UCHL5  
MAP2 MYO7A  
SFN ARHGAP32  
AR POU2F1  
EIF3H ABCE1  
RAB11A STX4  
EGFL6 SH3GL2  
RAN KIAA1377  
TNP1 PRKACB  
CSNK2A2 UBE2R2  
SMAD4 CNKSR1  
EGFL6 SH3GL3  
CDK8 MED16  
NUP155DMWD  
HOXB2 CREBBP  
MC3R MRAP  
CDC42EP2 SNCA  
BACE1 ITM2C  
APC KHDRBS1  
ATXN1 RAD54L2  
TAF13 TAF8  
BAHD1 BEGAIN  
PSMD11 EEF1A1

SFN ARHGEF5  
TTN P2RY12  
NR1H2 NR0B2  
VCAN CXCL12  
SMAD9 UBA6  
PRMT1 SH3GL1  
PEBP1 TRAF6  
RBL1 CD320  
CCNT1 MDFIC  
ESR1 POU4F1  
MED1 KAT2A  
BTK RPS6KB2  
BCL3 STAT3  
KIF5B YWHAH  
ACTN1 CTNNA1  
CSF1 RPS27A  
NUP153 XPO5  
TRIM27 TRIM29  
A2M KLK2  
ATG14 PIK3C3  
PPP1R2 NEK2  
TSN TRAF6  
SUV39H1 RBL2  
TCP1 TBK1  
BCAS2 SRRM2  
RPIA WDYHV1  
LMO2 MAPRE2  
EPHB6 EFNB2  
ADRB2 ADRB3  
IL2RB GNB2L1  
KCNB1 KCNS3  
PRKAR1B UBE2I  
PAM UHMK1  
POLR2B ITCH  
SPTA1 ABI1  
NAA10 HIF1A  
RPS11 PINX1  
KCNH1 CALM2  
PEX19 ABCD2  
BMPR1B SH3KBP1

S1PR1 HTR1D  
ARNTL EPAS1  
TAL1 BCL11B  
MXD1 PRAM1  
MYC FANCI  
CCNB2 FLNA  
BCL6 HDAC1  
FAM46A BCCIP  
SKIL ZBTB3  
PGRMC1 HEATR2  
TP53 TAF9B  
HSP90AA1 NFKB2  
USP2 HOOK2  
MAPK3 AVPR2  
SETDB1 PLEKHA4  
ATXN7L3 KAT2A  
CLU MMP28  
YY1AP1 EWSR1  
YWHAB MARK4  
GHR PTPN22  
KEL EWSR1  
UBE2V2 DZIP3  
PFN1 CRMP1  
DYNC2H1 DYNC2LI1  
TGFB1 BGN  
ACTN1 PHB  
BRCA1 ORC3  
ANXA2 SOS1  
KLHL24 COPS6  
JAK1 IL10RA  
ARF1P1 TMED2  
NFKB1 DNAJA1  
CDK4 CCND2  
RPL11 TBK1  
HDAC3 RUNX2  
RAB3IP BBS4  
AR COX5B  
UNC119 SEPHS1  
POU1F1 MED1  
ESR2 MKNK2

USP53 CPNE7  
UBE2C BUB1B  
TCEB1 TCEB2  
HDAC1 NUP54  
PFN2 WDR33  
MDM2 CUL1  
CBFA2T2 TAL1  
RIMS1 ERC1  
TAF10 TAF8  
LDOC1 FXR2  
EEF1A1 EXOSC4  
SMAD3 EPAS1  
TTN WNK1  
ZFYVE9 RHOT2  
GRB2 PLEC  
DCN COL4A5  
SRC STAT5B  
GAS7 MAP3K12  
INPPL1 SHC1  
PIAS1 SREBF2  
KCNJ2 IL16  
PRPF6 USP39  
BCR ABL2  
SLC2A3 GOLGB1  
BSG SLC16A1  
PRNP DPP6  
CFL1 PLD1  
PTPN6 SHC1  
TPD52L1 C7ORF36  
GNA13 USP3  
MCM10 ZBTB8B  
BEGAIN RIBC2  
EIF3D EIF3H  
SNRPA CDC5L  
HMGB1 SIX5  
MLH1 RUVBL1  
HCFC1 NFE2L1  
WDR37 EWSR1  
CYP3A4 STUB1  
CALM2 RCHY1



SH3GL1 SH3GL2  
SH3GL1 SH3GL3  
SFN BCAR1  
TNP1 PRKACG  
MYC CAPZB  
LRRC7 CTNND2  
RHOC ARHGDIA  
NR3C1 NRIP1  
HIST1H4I NCOR2  
GRB2 SKAP1  
EGF VTN  
CDKN1B ARHGDIA  
MAPK8 JDP2  
CDC42 BNIPL  
TBP NCOA3  
YWHAQ PPFIBP1  
CDH1 PTPRM  
SNCG EXT2  
PLSCR1PLSCR3  
RAE1 RBM8A  
VHL MYCBP  
NFKBIE PSMA5  
HIST1H3J GATAD2B  
DAND5 STAT3  
CASP3 ARHGDIB  
ETS1 EP300  
TP53BP1 PIAS4  
SFN SH2D3A  
PICK1 ACCN2  
LDHB TBK1  
AHR EP300  
VIL1 SRC  
VIM SNCA  
ERBB3 SH2B3  
PFN2 VASP  
TBL3 DHX30  
UBE2K RNF4  
MMP14 TIMP4  
UBR5 RELA  
PIK3R1 DAB2

C3 LAMA1  
ANK1 EPB42  
HOXA5 PBX1  
ITGB7 TENC1  
BRCA2 BARD1  
DYX1C1 MAP1LC3C  
UBC SH3KBP1  
SRSF3 SREK1  
SMURF2 MYOZ1  
EXOSC8 CWC22  
CDKN2A SMARCA4  
CTNND1 PTPN6  
SEPT4 NR4A1  
TRIM23 TSG101  
ACTB P2RX7  
MYCBPTMBIM4  
TP53 RASGRF1  
PLSCR1ZBTB16  
MBP PRKACA  
GHR BTRC  
CLCN7 PACS1  
CDC37 TBK1  
PSMA4 POMP  
CAMK2G LRRC7  
BMPR1B CHN1  
NEDD8 UBA3  
PTPRC PTPN6  
MAP3K7 NRIP1  
HRAS TIAM1  
SMARCA4 ZMIZ2  
ATF7IP SLC12A4  
LCK BCL3  
GLP2R GCG  
EIF1B PRMT1  
C4ORF14 DCTPP1  
GLI1 HDAC1  
RUSC2 RAB1B  
HSP90AA1 NFKB2  
TPI1 YWHAZ  
APBB1 FASLG

FLNB CRK  
HSD17B3 MLH1  
GSK3B NOTCH2  
ZFYVE9 FAM46A  
ATXN1 WNK2  
SHBG CTSD  
PPP1R13B TNIK  
BEGAIN DEF6  
SYK POU2AF1  
TNIK RUVBL2  
ZFYVE9 UBXN11  
PTPRB PXN  
TSC22D1 NRBP1  
TBP PIAS3  
MYO1CSMARCA5  
XRCC5 NR1H4  
SETDB1 C11ORF1  
CSNK2A2 CALM2  
PIAS2 SUMO2  
RHOA PLD1  
NID1 FBLN2  
RNF13 UBE2D4  
TIMM50 TAB2  
SIAH1 TRIB3  
BMPR1B TTC17  
STAT3 HDAC1  
GPAA1 PIN1  
ACTG1 ST3GAL3  
KCNQ1 AKAP9  
EIF3D PHLDA1  
COPA USP49  
KPNA3 HLA-B  
DBN1 IKBKG  
SARS SIRT2  
SFN CSNK2A1  
ACTR2 CTTN  
MEF2C MAPK7  
PSME3 ATG5  
CCNC MED29  
SRC CAV2

RXRG PPARD  
HCK SRC  
FTH1 TSC1  
TNFSF11 MAPK1  
EP300 PIAS3  
SNRPC SF3A2  
GAK CCNG1  
JAK2 BCR  
ESR1 SMARCD3  
AIRE LMNB1  
PDGFRA CAV1  
CUL2 COPS5  
APAF1 HSPA4  
PAX6 EP300  
NAE1 UBQLN4  
ABL1 SPTA1  
TUBB4 TNFRSF1B  
MED17 TRRAP  
JAK2 ERBB2  
WDR33 PRMT1  
EIF1B NUDCD2  
IL18R1 IL18  
DNM1 PACSIN2  
PDGFRB TYK2  
EPRS ARL4D  
DLG3 CACNG2  
RXRA NSD1  
MAPT CASP3  
PMF1 MIS12  
PLCG1 SH3BP2  
RAF1 HSPA5  
PABPN1 TNPO1  
MEF2C CBX3  
SRC PTPN2  
GABARAP RASSF5  
UBE2D3 RNF125  
YY1 SREBF1  
YIF1A SLC34A1  
DAND5 SOX10  
CNOT3 TOB1

NCK2 IRS1  
GRIPAP1 TES  
NGFRAP1 TRAF6  
E2F1 NGRN  
SPTB ANK1  
MEF2C CALCOCO2  
TDP2 TRAF3  
RFC5 MEPCE  
DAPK1 FADD  
WIPF1 NCK1  
GSK3B SPICE1  
HIST1H4I CTDP1  
MYC EXOC1  
MOBKL2B CNKSR2  
PSMD2 ADRM1  
SRF PRKDC  
EIF3M ACTR6  
GABARAP GABRG3  
MCM2 CDK6  
UBR5 KPNA1  
NCK2 ERBB2  
PRKCD PLCB1  
EPB41 SEC14L1  
MSX2 RUNX2  
PTPN6 KHDRBS1  
UBE2W AMFR  
RFX1 SMAD4  
PHB RBL2  
STRN3 PDCD10  
H2AFX MDC1  
STAT1 RNF11  
NCOR1 SRCAP  
SIN3A PFDN5  
GAPDH MAPK1  
FRA10AC1 RP4-788L13.1  
FYN GTF3A  
CSNK2A1 HSPB8  
CD3EAP SSRP1  
PPARD SPEN  
ATG14 PIK3R4

SMARCA4 MCPH1  
ATXN1 ZYX  
MLH1 RUVBL2  
H2AFX RAD50  
CDAN1 PDPK1  
CCDC116 MDFI  
E2F1 SKP2  
GRB2 DUSP15  
TPM1 C19ORF50  
SULT1E1 IGSF21  
PRKCB NCAM1  
TAF4 TAF8  
ZBTB24MDFI  
RAB6A TMF1  
KIT STAP1  
MYBL1 CREBBP  
SON YWHAG  
TAF4 TAF12  
BAI1 DLG4  
SPOP SIRT2  
NASP FTSJ1  
TARDBP HDAC6  
UBE2N ZNRF1  
CREB3 APPBP2  
PDPK1 TBL2  
NFKB1 TIMM50  
USP13 TRIM55  
E2F1 ATM  
BIN1 SYN1  
APEX1 FEN1  
NR3C1 CLTC  
SNRPB GEMIN5  
PRKCI PSD3  
FLT3 PTPN11  
TRAF2 TRPT1  
EGFR ERBB2  
CAV1 FAM113A  
ASCL1 MEF2A  
IL1R1 MYD88  
HCK KIT

TF GTF2F2  
UBE2I COPS5  
UBE2E1 RNF150  
SMAD7 FKBP1A  
MAPK8 BID  
MUC2 GALNT12  
HDAC1 HEY2  
BMP2 ENG  
SIAH1 HIPK3  
PLK1S1 CEP72  
MCC GANAB  
SUB1 HSF1  
TUBB4 MAX  
VAPB VAMP1  
CNBP IGF2BP1  
CBFA2T2 ID3  
MED8 MED30  
TBXA2R YWHAZ  
BIRC5 CASP7  
BIRC5 CASP9  
SMAD1 ZNF512B  
SHMT2 NDRG1  
RUNX1 TRAF6  
SUPT5H SAP30BP  
CA8 ITPR1  
SUMO2 TUBB6  
HDAC4 SMAD3  
NCOR1 HDAC5  
UBE2E1 RPS27A  
SEC61BSRP54  
RPS27ARAC1  
HSPA13UBQLN2  
FAM58A CCHCR1  
SMAD9 ARNT  
ABL1 ERBB3  
ESRRA NR0B1  
NCOA1 RORB  
IL18R1 IL1RAP  
CBX5 HDAC9  
RET STAT3

SFN WDYHV1  
YWHAG NUMBL  
SMARCC1 CHD7  
MYC TIAM1  
WARS CDH5  
CHEK1 SFN  
IPO5 GABARAPL2  
NR3C1 NFKB2  
HSPA5 GRB2  
DYNLL1 DLG4  
IL2RB IL2RG  
EEF2K RPS27A  
HSP90AB1 HES4  
AKTIP VPS18  
WBP4 HLTf  
HNF4A PPARGC1B  
MUTEDCNO  
NEFL SPTAN1  
UBE2E1 PAEP  
CD74 CXCR4  
SPTAN1 MAP4K3  
VIM LOR  
ABL1 LTBP2  
MAP2K4 MAP3K10  
MAP3K7 STAT3  
NCOA1 CREBBP  
GOLM1 SLC40A1  
EPS15 SPG20  
NUF2 MIS12  
TLK2 TLK1  
SNAP29IGF1R  
PML MDM2  
SEC14L3 HLA-G  
HTRA1 CDYL  
NUDT21 MPG  
CXCL11 CXCR3  
MED26 POLR2L  
SREBF2SLC4A5  
GCG GIPR  
VAV1 BTK



AQP1 KCTD17  
VPS33AUVRAG  
KDR STAT1  
COPS5 COPS8  
MITF MAPK14  
PRKCB MKI67  
NINL MAD1L1  
TBP HDAC1  
UBE2H POLL  
EWSR1 SLC22A24  
ADAM10 AR  
EIF3F EIF3E  
FLOT1 SORBS1  
MRAS RALGDS  
COTL1 PINX1  
AKAP13 CTNNAL1  
DNMBPEVL  
SREBF2PIAS3  
SLU7 SRRM2  
BCL6 CREBBP  
MARK3TCEA2  
TAF4 TAF9  
NDUFA4L2 LUC7L2  
BCR PTPN6  
GRIA3 NSF  
SF3B1 CCNE1  
BCR SHC1  
UBA52 MEF2D  
GRIN2B TANC1  
FGF2 FGFR4  
PTPRZ1GRLF1  
POU3F3POU3F4  
STX1B STXBP1  
CTSB USP29  
DCAF11 PARP11  
PITX1 NEUROD1  
AMPH CDK5  
SF3B1 PHF5A  
TP73 WT1  
EIF3H EIF3L

PSMF1 PDLIM7  
NFKBIA SUMO4  
EWSR1 CEACAM5  
BLM RAD51  
TSC22D1 HEATR2  
TIMM44 HSPA4  
COPS5 RNF139  
GNB1 CACNA1B  
MMP14 BCAR1  
GLRX3 ADAMTSL4  
MGMT UBA1  
NRBF2 CPVL  
MEF2A FAM50A  
HLA-A TAP1  
TUBA4A SIRT2  
ZNF23 PCBD1  
SKIL TFPI2  
NCOA1 ESR2  
ST13 MAX  
SRPK2 SRSF1  
PHF2 XRCC6  
SOCS3 TRAF6  
KARS DARS2  
PABPC1 EIF4G1  
HDAC1 DPEP2  
DNAJC7 RAD9A  
MYL6 MOBKL3  
PKD2 PACS2  
RXRA HDAC4  
GOT2 MCC  
GAPDH MAP2K2  
PRKDC KAT2A  
MDC1 ANAPC1  
MED29 MED16  
SCGB1D2 SCGB2A2  
RARA THRB  
STAT5A NMI  
NCOR1 YWHAE  
ESR1 YWHAH  
ZYG HIPK3

VIM MAP3K1  
PPP6R2 TBK1  
FN1 ITGB7  
CEBPD FANCD2  
DLEU1 SETDB1  
RARG JUB  
ABI1 ENAH  
HSPA5 IKBKG  
SOCS1 CSF1R  
ERBB3 CD82  
KBTBD10 CUL3  
HNRNPL HMG20B  
DGKD IGSF21  
SP8 HEYL  
HIST1H1B SIRT1  
OMA1 CDK5  
MAP3K1 SLC1A5  
MAP3K7 MALT1  
PSTPIP1 FASLG  
DNMT1 DNMT3A  
SMAD7 RPS27A  
NFKB1 TNRC6B  
LDOC1 POLL  
MAP3K7 TGFBR1  
SMNDC1 CDK5RAP3  
NMI EMILIN1  
GPRIN1 CACNG2  
HDAC1 DNMT3B  
YES1 CD46  
SLC2A1 CANX  
VIM TRIM28  
IKBKE SMARCC1  
CD3EAP CD3E  
SON YWHAB  
GRB2 MED28  
NMI BRMS1  
SOCS2 PRLR  
COPS7A COPS3  
ZRANB2 ARRB2  
RHOB FBXO42

AKT1 PRKCZ  
ERBB2 ACP  
MYF6 ELSBP1  
CTSG CXCL12  
PRKACA CAD  
TFAP2A WWP1  
ERN1 HSP90AA1  
SFN RICTOR  
SMAD1 ZNF521  
CREG1 RBL2  
CCNA1 LARP4B  
HNRNPH1 MYSM1  
ZZZ3 ZNF496  
PSAP COPS6  
PFN2 GOLGB1  
EWSR1 SF1  
SMAD3 EID2  
EGFR APPL1  
NPHS1 YES1  
COPB2 TNFRSF10D  
NPHS1 LYN  
CDC20 HDAC1  
SETDB1 ESCO2  
HDAC3 MYC  
PPARD PROX1  
EIF1B CACYBP  
PRKCB RIPK4  
MCM4 CDT1  
EFEMP2 CCND3  
USP13 MRPL20  
ZBTB16HDAC5  
CDK1 UBE2A  
FHL3 PAK7  
H3F3B SS18  
NCL MAP3K1  
VIM PAK2  
S100A4 SEPT6  
SNAP29PACSIN1  
MAP1A DISC1  
AXIN1 SH3GL1

GAD2 GAD1  
TGFB1 TGFB2  
MYH9 WNK1  
GNAI2 TSHR  
DDX3X ZNF512B  
MAPK8 COPS2  
POLR3G POLR3H  
RELA BTBD2  
FN1 TGFBI  
DYNLL1 DLG2  
EEF1A1 ZCCHC10  
FYN POLD1  
ERBB2IP NOD2  
CLN3 FANCI  
SIN3B MYT1  
NFRKB UCHL5  
RANBP2 KIAA1324  
RPL35 CBF3  
PIK3R2 CRKL  
HEXDC GDPD2  
KCNJ4 KCNJ2  
TNNT1 CCDC85B  
CUX1 CREBBP  
GAPDHREL  
RAE1 SEH1L  
ARPC2 ACTR3  
GATA2 POU1F1  
EIF3H EIF1B  
ARRB1 CALM2  
EWSR1 MYOZ2  
MAP4K2 TRAF2  
ARPC2 ACTR2  
AR TDG  
TBP ELF3  
LIMK1 RLIM  
SKI GATA1  
PAK1 C5ORF42  
DAND5 MIS18BP1  
CALR CANX  
ABL1 MTOR

HDAC1 TPD52L1  
IL2RB IL15RA  
XRCC6 WRN  
RASSF7TSC1  
VCP DERL2  
LDLR FLT1  
LSM12 GOLM1  
FN1 DCN  
KIAA0090 TNIK  
PAK1 ZNF418  
ZRSR2 U2AF1  
RPS27ARELB  
TBCA TNIK  
CSNK2A2 BID  
PTPRC LGALS1  
NLK LEF1  
CDK4 SMC3  
CTSE EDN3  
MAPK6 RNF2  
AR HDAC1  
FGF1 FGFR3  
NR3C1 YWHAH  
ITGA5 ANGPT1  
NDUFS6 FGFR3  
P2RX3 P2RX2  
PLRG1 CDC5L  
RUNX1 ELF4  
PPARD HDAC2  
DST SREBF2  
AKT1 AKT2  
CDC7 CDK4  
RAPGEF3 RRAS2  
HSPA5 TAB1  
PSMC3 PAAF1  
GRB2 KIF13A  
HSPA4L SOS1  
ADRB2 OPRD1  
PLAT FN1  
PFDN6 RUVBL2  
RHOD SMAD4

UBR5 MAGED1  
TP53 BCR  
PIK3CA PRKCD  
SLC25A21 AZI1  
TEX11 SNX7  
MAP1LC3A ATG3  
ATP5C1ZNF337  
VDAC1 MCL1  
EGF GRB2  
FGF2 SDC2  
DAB2IP TP63  
ZEB1 EP300  
ITGB1BP1 CAMK2A  
SNX3 RPS27A  
CDK2 CCNH  
COL1A1 CD44  
MCM3 MCM6  
PSMA3 CSNK2A1  
PARP1 TAF13  
CORO1A ACTB  
TGFB2 TGFBR3  
ATP6V1E1 SOS1  
SNX3 GRB2  
ZNF821 C1ORF190  
FBL ARFGEF1  
NR1H2 ING3  
ANK1 PLDN  
STAMBP CHMP4C  
UCHL3 NEDD8  
STAT6 WWP1  
PLK1 TMF1  
PPP2CB FAM40A  
FGFR2 PIK3R1  
EIF1B PFDN2  
DEPDC1B FAM175B  
EVPL PLEKHA5  
MLXIP CNPY2  
HLA-B S100A11  
DMWD FTSJ1  
SPAG9 MAPK14

ESR1 PIAS3  
HDAC1 ZMYM2  
C20ORF24 ATAD3A  
TRIM23 AKTIP  
KCNA4 KCNA1  
SGSM2 CELSR3  
C20ORF24 FANCI  
PSMD4 PSMB7  
PARP1 TCEA2  
RAB7A RILP  
VDAC1 BCL2L1  
RUNX2 CREBBP  
MCM2 ORC1  
VDAC1 BAX  
MCM2 ORC2  
PAICS CCNA1  
CRK MICAL1  
ACTA1 PPP1R9B  
ESR1 NCOA3  
KNG1 HABP2  
MGRN1UBE2D3  
MTA2 SUMO2  
CD5 CSNK2A1  
APP BGN  
FGF1 CSNK2A2  
CRK SUV39H2  
FLOT1 BBS2  
ELAVL1 RUVBL1  
NFE2 WWP1  
AKT1 STUB1  
HSPA1B YWHAQ  
GADD45G GADD45A  
CD3E EPS8L2  
AR CASP7  
NR3C1 TSG101  
EIF2S1 SFN  
MYOD1PRKCA  
C1R CSNK2A1  
TRMT112 TNIK  
SOCS1 IL2RB



CASP8 NR1H4  
DPPA2 PBXIP1  
GTF2H1 JDP2  
FGFR1 ATG5  
SREK1 SRSF8  
SPP1 PRKG1  
GUK1 UBE2Z  
DAND5 ESRRB  
PTK2 SRFBP1  
MYC CREB1  
RPL8 ST3GAL3  
TPPP GAPDH  
EBNA1BP2 LYAR  
MAPK1 PPP1R9B  
KCNA4 SNTA1  
PSMD4 PSMD1  
CSTF2 BARD1  
HES1 HES6  
TFDP1 E2F4  
SGTA GPX7  
EVI5 INCENP  
MED14 TRRAP  
CBL AXL  
MMP7 CD44  
RAB11FIP3 TOMM34  
FBXW4 CDC37  
TTC27 PHLDA3  
SPINT1 HGFAC  
CHM EEF1A2  
RIPK1 CDC42BPB  
TNFRSF1B TUBA3C  
SSX3 SSX2IP  
SH2D1B CD84  
NFKB1 HSPA1B  
NIF3L1 CUTC  
MPDZ OR1D2  
BRCA1 CDK5  
SCNN1B SCNN1D  
DYNC1H1 FAM46A  
CAMK2D IKBKG

CDH2 CREBBP  
SCNN1B SCNN1G  
BRCA1 CDK16  
NFKBIA CSNK2A1  
USP4 SART3  
SLC3A2SLC7A7  
RUNX2 KAT2B  
CFLAR DOK2  
NSF FUNDC2  
RAC1 MAP3K10  
PPP2R1B RAB18  
ATP5C1NGEF  
WBP4 CAPRIN1  
TRIM28TRAF6  
RPS27AYWHAZ  
PDIA4 PDIA3  
SRSF2 CIR1  
SLC25A1 MAGED1  
EPOR MAPK3  
PRPF40A HSPG2  
PRKCZ FEZ2  
TJP1 UBN1  
TCEANC ZNF167  
EZR PALLD  
NUDT1 NTHL1  
MCM2 MPP3  
CD2BP2 RAD54B  
NTRK1 CAV1  
CCND1 IFI27  
ZNHIT3 ESR2  
PPIB DNM2  
CBL UBASH3A  
SMAD9 DST  
TTR HSPG2  
DAZAP2 PEF1  
TTR LRP2  
DAND5 GATA1  
PCGF2 RNF2  
NCOR1 TRIM33  
PIGR CCL5

CTNND1 GRIK2  
CDC25A MAPK14  
SORBS3 KIAA1217  
VCL CTNNB1  
VCL CTNNA1  
UBE2D1 UBASH3B  
PSPH STYXL1  
TRAF5 TRAF3  
TSEN2 TSEN15  
PSME1 TUBB2A  
GH1 CACYBP  
DHX30 SIN3A  
EGFR PSMD4  
PCGF2 PHC3  
CHD1 H3F3B  
FCGR2B PTPN11  
CDCA5 PDS5B  
MPHOSPH10 IMP4  
CDH1 RRM2  
HDAC3 SPI1  
ORC4 CDKN2A  
CEBPB CAMK2A  
HDAC3 PPARG  
EXOC4 EXOC1  
PRUNE2 EWSR1  
RNASEH2A BATF  
NR4A2 EIF3A  
HIF0 GRB2  
CTNNB1 RUVBL2  
B3GNT1 GYLTL1B  
CD164 MYO5B  
CLSTN1 TOPBP1  
JAK2 PKD1  
SLC25A5 IKBKG  
SRSF11 PIN1  
CA2 SLC4A5  
NUP98 MOBKL1B  
EXOSC10 FERMT3  
CYCS CYB5R1  
TUBA1A STARD13

DEPDC1B USP7  
SRC LNX1  
SEC61A1 NDN  
CUL4B COPS6  
CSTF2 FEZ1  
TCEB1 ASB8  
KCNC1 KCNG3  
UBE2D3 RMND5B  
E2F1 ARID3A  
RUNX1 NCOR2  
CD3E EPS8L1  
APOE VLDLR  
RNASEH2A MAPK14  
CD3E EPS8L3  
MLH1 MLH3  
HDAC1 HINFP  
E2F1 TRIM28  
EIF3F CSNK2B  
CDK1 BCL2  
PPP1CBPPP1R7  
USP1 LYZ  
TEX11 TCHP  
PIAS1 CREBBP  
NCL FBL  
CALR3 SRRM2  
RFWD2 CCT7  
PTGDS ATXN1  
CTNNA1 PTPN14  
RASA1 HTT  
GPI RPS27A  
PACSIN1 PACSIN2  
MLH1 IL20RA  
APOE LRP2  
HIF1A EGLN3  
PAFAH1B2 PINX1  
PDS5A STAG2  
NADSYN1 MYO15B  
ADRBK2 CXCR4  
PIK3R4 MAP1LC3C  
MAPKAPK2 ETV1

CDK5R1 LMTK2  
NPM1 MDM2  
MITF OTX2  
KCNA3 BAX  
SMCR7 UBQLN4  
ALB PSMD4  
PIK3R1 AXL  
NOTCH1 NOTCH3  
RB1 L3MBTL2  
NID1 PLXDC1  
TK2 C14ORF1  
PHYH PHYHIP  
YWHAG FHOD1  
PRSS23 PDPK1  
GRB2 CHR1  
PLCG1 FGFR2  
WDR33 GIT1  
HDAC3 VHL  
PTPN2 ITGA1  
ACTG1 PLD1  
CUX1 KAT2B  
SH2B2 KIT  
YWHAQ WDR77  
RPS6KB1 BTK  
PDHB IKBKE  
PTGDS PTGER2  
BTK WASF2  
PPP1R9B RIPK3  
PRKCA XK  
IKBKB PRKCZ  
ERBB2 PTPRO  
PIN1 PKMYT1  
AR CUL4B  
SOD2 VHL  
IL1R1 IL1F10  
IKBKE TANK  
SKIL NID1  
GNAQ AKAP13  
TGOLN2 NCSTN  
VAV3 ALK

ZBTB16ENOX1  
SPTAN1 ERCC4  
GH1 PDHB  
GRM5 HOMER3  
TCEA1 POLR2B  
CDC42BPA PPP1R12C  
SREBF2INSIG2  
PRKCZ CLASP1  
RHOG ELMO1  
NCOA1 DDX17  
RUNX1T1 ABI3  
CD2BP2 MAGED1  
CDC42EP4 WDR6  
IFT140 CELSR3  
GP1BA CTSG  
TGFB1 UIMC1  
RBL2 SUV420H2  
DPM2 DPM3  
HSP90AA1 FKBP4  
EZR FASLG  
SORBS3 ADAMTSL4  
ERBB4 DLG2  
CCNB2 CDK1  
COPS5 MAP3K3  
BRCA1 SMARCA2  
CHD3 CTTN  
THOP1 MPP6  
NCOA1 KAT2B  
AP1S1 ARMC6  
BRCA1 SMARCA4  
TRAIP UBE2Z  
RIPK1 IKBKG  
CDK9 HEXIM2  
MAPK8IP3 MAPK8IP1  
HIST1H1E EHMT2  
ACTG1 ITGB3BP  
RPA2 CHD1L  
SNRNP40 PFDN2  
MYOD1NR2F2  
HTT FEZ1

EXOSC10 EXOSC7  
KIT PTPN6  
EPB41 PSMB5  
TAC1 MEP1A  
PIN1 PTOV1  
PML NCOR2  
CUL4A CAND1  
DNAJC11 GSTK1  
DAND5 GTF2B  
VPS33AVPS18  
ATN1 MEGF11  
PPM1G USP36  
WWP2 EWSR1  
APC LRSAM1  
NASP HIST1H3J  
TPM1 EPB41  
TP53 SERPINH1  
REC8 SYCP3  
TP53 SERPINB9  
PRKCG PICK1  
STX1A CPLX2  
TJP1 RAB8B  
STAT1 PRMT1  
EXOSC10 XRN2  
PLAT MAPK3  
PTPRC JAK3  
NOTCH2 JAG2  
EPB41 CYCS  
DNAJC7 MAP3K3  
NCOR1 PPP1CB  
CS TRAF6  
RAC1 PARD6G  
SLC25A5 SIRT4  
KRT5 EVPL  
RAC1 PARD6B  
BRCA1 BRCA2  
CRMP1 SEPHS1  
FHL5 ZSCAN30  
ILF3 PRMT1  
COPS5 DCAF4

CLK2 UBL5  
NCOR1 PPP1CA  
HSPA5 MTNR1B  
IL11 IL6ST  
NONO MAD1L1  
GLB1 CTNNBIP1  
HDAC2 CREBBP  
HIF1ANINVS  
RGS10 GNRHR  
GAS7 ACTA1  
PRKCA AVPR1A  
C1QTNF1 UBQLN4  
RAB1A ADCK1  
CAV1 PLD2  
ERG SETDB1  
CD44 IGFBP3  
U2AF1 RP9  
KIF5C KLC3  
GTF2B RELA  
MCC STRN4  
TXNRD1 TXNIP  
GRB2 SEMA6A  
ACTG1 EPS8L3  
SRC PTK2B  
ACTG1 EPS8L1  
RPL5 CSNK2A1  
POU4F1RIT2  
NCOA1 COPS5  
GTF3C1ASCC2  
PLAT FGA  
RPL7 CANX  
SRC PRDM2  
BRCA2 ATR  
SNAPC2 SNAPC4  
PIAS4 MAGEH1  
MAP4K4 ANKRD26  
SRC AKAP6  
RUNX1 HIPK1  
USP19 PYGL  
GPS1 DDB1



CRK DOK4  
YWHAG RAI14  
RPS27A GCM1  
ZNF193 SP110  
PI3 CELA1  
CAPN1 DES  
POLR2C POLR2E  
KIAA1549 ITSN2  
BAG6 FAM46A  
UPF1 SMG1  
GFAP GRAP2  
TRIM21 EEF1D  
RET GFRA1  
CEACAM5 EWSR1  
YWHAG MARK1  
HSP90AB1 GPN1  
GOSR1 NSF  
RBPJ KAT2B  
RBPJ KAT2A  
MYH9 PRKCE  
BCL10 BCL3  
ACTN4 CAMK2A  
UBE2Z SRA1  
RUNX1 SMAD5  
YTHDF1 GSTK1  
XRCC6 ARAP1  
TSC22D1 OSTC  
SRC RIN3  
H3F3B SAP130  
GRIA1 TRPC1  
SRC CTTN  
LIPE NSFL1C  
CYCS NDOR1  
SRC TRAF1  
AVIL CRK  
EIF4A2 DNAH5  
RPA2 MED31  
POLR1A BARD1  
KRT36 LYAR  
GRAP2 SHC1

WNT7A STRN4  
FYN CD44  
PIN1 RBBP8  
KLKB1 HGFAC  
DCD EIF2B1  
TOB1 SERGEF  
PDGFRB PTPRG  
MAPK1 CIITA  
ANKRD6 AXIN2  
BCL6 HDAC2  
SUPT7LMED17  
SLC2A1CALR  
CAPN1 CLEC4G  
GLI1 ZIC1  
CST6 HLA-B  
MAST3 CNTNAP4  
MMS19 GIPC1  
YWHAG C16ORF80  
ZBED1 UBE2I  
C7 CLU  
POLR2I POLR2H  
PSMD3 PAAF1  
SLC38A1 TACO1  
SRC LCP2  
FTH1 PACSIN1  
CA2 SLC4A2  
OGT SIN3A  
SEMA7A ABL1  
STAC C9ORF156  
MLH1 RAPGEFL1  
PLIN3 TBPL1  
SF3A3 SF3A2  
DAND5 GATA3  
IGF2 GPC3  
UCHL1 COPS5  
NFKB1 MATR3  
ACTA1 XPO6  
SYT1 PCBD1  
BIRC2 TRADD  
NTRK1 PIK3R1

ABHD16A ATP5G3  
CDCA8 AURKB  
SRC PDIA2  
SLBP UPF1  
ADRB2 CSK  
CLIP3 WNK1  
MSH6 PSMD4  
SDCBP2 NRXN1  
HSPA5 NFKBIB  
TMEM33 PPP1CB  
NR3C1 KTN1  
CD177 EWSR1  
APOH LPA  
CTNBL1 CALCOCO1  
UBLCP1 TSC22D4  
YWHAG SH3BP4  
COX7A2L MAGEA11  
ARNT SIM2  
MED29 MED31  
PTPRC PAEP  
MAP3K10 KIF3A  
GTF2I ZBTB17  
PGAM2 USP15  
MAP3K7 TUBB  
RAB11A RAB11FIP5  
DAND5 E2F2  
SF3A3 SF3A1  
BCL2 MAPK1  
UBE2I RORB  
UBE2I TFAP2C  
DYNC111 DYNLRB1  
BRCA2 SMAD3  
LYN CSF2RB  
PINX1 DDX18  
MAP2K5 MAPK7  
CLASP2 MAPRE1  
PLCG1 RYR1  
MYBL2 HIPK2  
ADRB2 ADRBK1  
TNNT1 SMAD1

TNNT1 SMAD2  
PDGFRB PTPRB  
PIAS1 ESR2  
PDGFRB PTPRE  
DPPA2 MOAP1  
PGAP3 FBXW11  
PRKAB2 NET1  
PARP1 MED1  
EIF3F EIF4E  
ATAD2 NCOA3  
LONP1 TSC22D1  
LOX DHDDS  
VASP ABI1  
SMAD2 E2F4  
PMCH MCHR2  
PAK2 SH3RF1  
UBTF CSNK2A1  
PDGFRB JAK1  
PIAS1 CREB1  
PLOD3 HNRNPA1  
IL6ST GRB2  
MAPK1 TNIP1  
DEDD KRT18  
PPM1G SNRNP70  
SRF MAL  
TNFSF9 TNFRSF9  
PLCG1 ERBB3  
TTR MARK3  
HLA-B RANBP1  
VPS33BUVRAG  
ZNF165 ZSCAN30  
ARHGDIB KLHL12  
GCDH EXOC6  
YWHAZ SSBP1  
USP39 TSR2  
SRSF7 NXF1  
MEF2D CARM1  
EPHB2 RYK  
NR1H2 TMEM161A  
HGS EGFR

NKX2-3 GTF2A1L  
HSPA9 MAP3K8  
CORO1A UBE2G2  
CASQ2 CSNK2A1  
PRPF4 PFDN1  
HMGB1 CTCF  
CPNE6 OS9  
RNF103 DERL1  
SRC P2RY2  
HDAC3 TCP1  
RPIA FXR2  
PPP1R3D SFN  
CSF2RB CISH  
COL6A2 ABCD3  
RRP1 LARP1  
PHLPP1 WDR20  
CYB5R3 PRKAB1  
THRA RXRG  
MAP1LC3A KIF15  
TGFB1 ACVRL1  
DCTN1 DST  
SRC CSK  
SRC TIAM1  
SORBS3 RAPGEF2  
NR3C1 BAG1  
DLG1 GRIN2B  
TP73 ASF1A  
RPS27A RUNX1  
C10RF65 MDFI  
ID2 RBL2  
RAE1 UFD1L  
CDKN2B CCDC90B  
TGFB1I1 TRAF4  
CLDN5 CLDN1  
SLC2A4RG HDAC5  
APEX1 ANP32A  
PPARG HDAC4  
MCM2 ATM  
DAND5 DROSHA  
OTUD4 BAG5

PRSS23 HSPA4  
EGFR GNAI2  
SNRPB SF3A2  
PTN CAPZB  
ZNF24 ZNF434  
CDC42EP1 RBPMS  
PDIA4 HLA-B  
PHF2 THAP1  
UBE2G2 AMFR  
CDX2 SOAT2  
VCP SRRM2  
VIP MEP1A  
CDH2 RAB8B  
PRSS23 PHF23  
GRAP2 CSF1R  
STAT3 NFKBIZ  
FLI1 KLF1  
TRIM21 APC  
FHL3 TRIP6  
SH2B2 ERBB2  
ABL1 CUL7  
SH2B2 NTRK1  
PLK1 CHFR  
HLA-B PLS3  
XRCC6 XRCC5  
CCR7 CCR10  
SNRNP70 SRPK1  
CCNC MED10  
MAPK3 CASP9  
TARBP1 WDR48  
PRKACA ITPKA  
TCF4 TAL2  
PARP1 XRCC6  
PCNA MSH3  
RPA1 PRKDC  
PIK3R1 RRAS2  
RXRA TAF1B  
UHRF2 UBE2D4  
CRMP1 HMGB1  
SF3A2 AGGF1

HTT SH3GL3  
PAICS DGKE  
ATP6V0C ARF6  
TOP2A SUMO2  
CDC42 ARHGDIG  
GNAO1 OPRD1  
GNA12 ARHGEF1  
TRAF3IP2 MDFI  
VHL HYOU1  
CSNK2B RNF7  
ZFP64 C14ORF1  
EEF1A1 PACSIN1  
C3 CFI  
BUB1 AP1B1  
HDAC3 PBX1  
SEPT6 CDC42EP3  
HSF1 TAF9  
XIAP STUB1  
NUDT21 TRAF6  
CTSB RGS2  
MAP3K7 CALM2  
MYC HUWE1  
MERTKIKBKG  
EPPK1 GABARAPL2  
EIF1B FTSJ1  
RECQL5 NCL  
EEF2K PRKACA  
RXRA ZBTB16  
CDH1 PLEKHA7  
ILF3 ZNF346  
CRK MYO18B  
MYLK ALK  
FXR1 FMR1  
RORB MAP6  
SMAD9 YWHAQ  
AXIN1 LRP6  
NPHP1 BCAR1  
CAV2 MALL  
PMS1 CUL1  
JAK1 CCR5

HGS UBE2I  
NCK1 CCKBR  
PHB CXORF26  
CASP7 CASP10  
NGFR SORT1  
NEB APC  
PRKCQ IKBKG  
FYN TNK2  
PPP1CBWBP11  
SDC3 PTN  
SRSF4 SRSF6  
SNRPB SKIV2L  
FBL TAF9  
LAMB3 LAMC2  
PMS1 CUL3  
NKRF NFKB1  
RAG1 PLCG1  
DPM1 MTNR1A  
BMPR1B RAP2A  
MSH2 SUMO2  
ITGB2 ITGAL  
JAK1 STAT5B  
MAPK1 PPARG  
ITGB2 ITGAX  
BAG6 CHN2  
HSPA5 TRAF6  
SLC34A1 FHL2  
MYOD1PHB  
SNW1 NCOR2  
CDK2 EP300  
FOS RUNX2  
F2 PROZ  
TADA3 EP300  
NTRK1 SHC2  
PDXDC1 INPP5K  
IL1A CASP1  
NR3C1 RAD9A  
MED8 MED9  
PIN1 SREK1  
SF1 EWSR1



NR2F6 TMX4  
CACYPB TRAF6  
YWHAZ MPRIP  
COL4A1 COL7A1  
PRKCDBP EPS15L1  
FOS CCDC158  
YWHAQ ING1  
CD44 TRAF6  
PDE6D CDC42  
ASAP2 ITSN1  
RET MCRS1  
CDC25A CDKN3  
GATA1 CASP3  
TNFRSF10B RHOA  
STAT5A AGAP2  
SRF RXRA  
CLK2 CLK3  
TCEAL1 SSR3  
DAND5 PURA  
HSPA5 MEPCE  
WDR20 OPTN  
F2 ST13  
CRK FASLG  
PPBP COPS7A  
SMAD3 MBD1  
HSPA4 ZMYM2  
PDHX DLAT  
PSMB5 FTSJ1  
DISC1 MACF1  
CCNE2 SUMO2  
KRT31 CDK12  
RHOBTB2 KDM5B  
SPIB E2F2  
LMNB1 SUMO4  
UBC MAP3K3  
ETS1 PIAS4  
CSK CREBBP  
MLL3 ASH2L  
ABCA1 TRIM27  
SMAD9 ACVR1

ILF3 MDFI  
NR3C1 TJP2  
EIF1B PCMT1  
PDLIM1 PITX2  
LHX2 RLIM  
CTSD SLC2A4  
SMAD3 ST6GALNAC2  
CLASP2 SMYD2  
XRCC1 TDP1  
FANCA SPTA1  
HAND1 HAND2  
PRKCA ACTA1  
EEF1D STK33  
SLIT2 ROBO4  
VPS72 EWSR1  
LRSAM1 FAM178B  
ITGA2BRNF181  
KIF1C PTPN21  
SET OTUD5  
ACTG1 MAP3K1  
TPM1 S100A2  
BUB3 HDAC2  
AIRE MSH6  
UBA1 TMCC2  
RAD21 CASP7  
STAT5A CARM1  
MLH1 STAP2  
NFKBIE TUBA3C  
NDUFS6 KCNH2  
SNRPD1 GEMIN6  
VHL HSPB11  
IQUB MDFI  
EGFR ADRM1  
PPP4C CCT7  
HMGB1C14ORF1  
APC GOLGA2  
NR3C1 HNRNPU  
UBE2D1 BRIX1  
VNN2 ITGB2  
ATN1 NELL2

MSX2 ZDHHC2  
RIPK2 TUBB  
TFRC MYO1G  
FLNB SRC  
NR3C1 CLU  
BRCA1 UBE2D1  
GAK AP1M1  
CDC25B CSNK2A1  
S100A1 NIF3L1  
ETS1 NCOA3  
HSPA4 DNAJB11  
PARD3 PLCB1  
RAB7A GABARAPL2  
DMAP1 RUVBL1  
ETS2 SMARCA4  
SRGAP3 SMARCC2  
MYD88 IRAK4  
RPS16 NFKB2  
SCN4A DLG3  
BCL2L1 GTF2I  
CD9 MEF2C  
PLXNB1 RND1  
L1CAM CNTN1  
EWSR1 PCBP1  
SKA1 PLDN  
TUBA1A IKBKG  
EPHB2 MAPK14  
IRAK2 IRAK1  
PXN PTK2B  
CD81 PTGFRN  
HABP4 PIAS3  
APCS C4BPA  
LMNA KAT5  
HAP1 RER1  
CDK2 NOV  
EXOSC6 EXOSC8  
EMD LSM2  
PARP1 HMGA1  
PSEN2 DOCK3  
PDLIM4 RBPMS

RNF10 UBE2W  
SARNP SLC7A9  
NDC80 SMC1A  
UBE2D2 TRAF7  
NT5C2 FXR2  
KAT5 ING3  
SAP30 BRMS1  
GOSR1 IL27RA  
LDB2 LMO4  
KRT2 SMAD3  
RET DOK6  
PTPN6 KLRB1  
TRIB3 GIT1  
PTN ATRX  
RIPK1 RNF11  
MEF2C LAMA4  
ARL1 GCC1  
MAP4 FYCO1  
ACACASIRT1  
BRD4 HEXIM1  
SPRN STRN4  
RANGAP1 PRKAB1  
CBX4 BMI1  
CBX4 PCGF2  
PLOD3 TECPR1  
PRLR FBXW11  
NCK1 CAST  
ZNF862 ATN1  
CCNH RADIL  
EGFR ADRBK1  
LNX1 RAD54B  
PIGR AP1M1  
EWSR1 PRTFDC1  
RTN3 FGFR1  
SFPQ RAC1  
LCK CSF2RB  
UCHL1 IKBKE  
PROP1 HESX1  
SNRPA PAPOLA  
HDAC1 HIF1A

DAXX PLAGL1  
ARHGEF15 ESR1  
RNF111 TSG101  
CASC3 EIF4A3  
TRIB3 ATF5  
ITGB1 RAB21  
MCM3 PPP2R1A  
FN1 CTSD  
MCM3 PPP2R1B  
MAPK13 KDM2A  
RALGDS RAPGEF2  
HOXD9 HOXC9  
CPE RPA1  
DDX3X PRKCZ  
PRKCD C1QBP  
EIF3F GLE1  
CDC42 RPL23  
IKBKE HDAC2  
CDCA8 INCENP  
AIP IKBKG  
HSPB1 HNRNPD  
FRYL YWHAB  
TPR NFKB1  
RANBP9 UBE2Z  
IL4 IL2RG  
PRPF6 MEPCE  
SMC1A USP32  
HOXA5 TWIST1  
IGSF21 PRMT1  
EEF1A1 CRADD  
ADRBK1 GNA15  
PAK3 RAC1  
AKAP9 TACC3  
CTBP2 HGD  
RNF111 UBE2Q2  
YWHAZ TUBB1  
SRC DAG1  
IL6 IL6R  
RARA RUVBL1  
UBC TSG101

CLN3 GCN1L1  
AR NCOA4  
DISC1 EXOC7  
CFB C3  
ZBTB16KIAA1549  
DVL3 DIDO1  
EWSR1 ZBTB1  
MEF2A VGLL4  
EWSR1 NINL  
STAT5A CCR5  
CCNO ITSN1  
EWSR1 WDR37  
TOX4 PLCG1  
PRKDC TRADD  
MEGF10 RACGAP1  
CD8A B2M  
SRC DOCK1  
HIST1H2BB DYRK1A  
TRIM28PRKAB1  
UBE2C CDC20  
TRIM27FBXL19  
S100A10 BAD  
MAP4 MARK4  
ATP13A4 HES4  
STXBP1 STX1B  
PSMD7 PSMD13  
RAD51L3 ZSWIM7  
GSK3B PPP1CA  
COX4NB TTC35  
RPS14 RELA  
CCL5 GRB2  
ALB DMWD  
PIGK PIGT  
HCK RAPGEF1  
FXYD1 ATP1A1  
WRN MDC1  
FXYD1 ATP1B1  
TAP1 THOC5  
GRHL2 GRHL3  
ITGB1 ITGB1BP2

PAX6 PBX1  
SLC38A1 CSNK2A1  
MAP1LC3B ATG3  
DFFA CASP7  
MAP3K3 RAI14  
EXOSC10 SKIV2L  
CSNK2A1 MCRS1  
USP2 KRT15  
ATG12 RB1CC1  
NGFR MAGEH1  
YWHAZ EPB41L1  
U2AF2 GIGYF2  
DISC1 AGTPBP1  
UBE2D1 DTX3L  
RELA ASCC2  
HTT ZDHHC17  
SMAD4 NAT8  
MUC1 GALNT10  
ADD1 SMARCA4  
PPP4C CALML5  
SLC1A5TBC1D17  
ADD1 SMARCA2  
SMAD2 SUPT6H  
NTSR1 NTS  
ATG12 PTK2  
EIF3B EIF3K  
RFXAP RFXANK  
POU2F1HOXC9  
HNRNPF SUMO2  
SPTBN4 DISC1  
STAT5A STAT5B  
F2 SERPINE1  
ATXN3 CREBBP  
YWHAB CRNKL1  
FYB ENAH  
SUMO2 TOP2B  
MOCS2 ABCF3  
KLKB1 IGFBP3  
NECAB3 APBA2  
CDC42 RPL31

POLR2E MED10  
RPS6KB1 PPAT  
XPO4 BRF2  
NCK1 FLT3  
ASNS STRN4  
AKT1 SFN  
TRAF5 RIPK1  
SMAD4 RTDR1  
MCC SAR1A  
CUL4B DET1  
THRA NRIP1  
RPAP3 HELLS  
APBB1IP PACSIN1  
USP4 MEPCE  
C9ORF9 DDX24  
PMS1 ATR  
PDS5A GSTK1  
DBI PPCDC  
EIF3G EIF5  
C2ORF73 SH3BP4  
PCNA CDKN2A  
DARS AIMP2  
HLA-A COPG  
GNB5 OLFM2  
ADD1 SIN3A  
F2 SERPINA5  
ARRB1 ARF6  
F2 SERPING1  
HNRNPL APEX1  
POLR2H POLR2L  
HSPA5 RIPK3  
LPHN1 DAXX  
SRCAP ATG9A  
CDK8 MED13  
SMAD4 DACH1  
PRKACA ITPKB  
TRAF2 USP53  
NUP43 NUP133  
TGFB2 TSSK1B  
TNNI3 PKD2



PHF2 NCR1  
HNRNPK TP63  
TAC1 TACR1  
CAPZB MRPL20  
RUNX1 WWTR1  
SCRIB TRIP6  
STAT6 RLIM  
MED8 MED17  
LYN FCAR  
PARD6A PLCB1  
DLG4 DLG3  
ERBB3 ITK  
WDR5 RBBP5  
SNAP23STX4  
DST KIAA1549  
SORBS3 ABL1  
IL2RG IL2  
SNW1 IKBKG  
SRSF2 CCNL1  
ALDOATRIM63  
OSTM1 GPSM1  
MAP2K7 CASQ1  
SSR1 EDEM1  
SF3B1 PPP1R8  
ITGA5 NISCH  
CYP27B1 NCOA6  
PRNP CNTN1  
CASK SDC2  
MCM7 GSTK1  
CUL3 CASP8  
FLG CSNK2A1  
HSPA5 POLR3H  
DSPP PRKCE  
MYC MAPK1  
KIF23 BIRC6  
CBX1 LBR  
RANGAP1 TRAF6  
SRF NFYA  
ABL1 PLCG1  
BIN1 SNX4

GAPDH SERPINB9  
NKRF RELA  
CDH2 GRIK2  
WDR77 DPEP2  
RPS27AUBASH3B  
TAL1 SSBP1  
S100P AGER  
FSHR S100A10  
SFN APLP2  
RPS6KA5 HIST1H4I  
DNTT PCNA  
SMEK1 PPP4R2  
PML HNRNPU  
STAT3 CXCR4  
EDN3 CMA1  
PLA2G1B BGN  
DNAJA1 TAB2  
UHRF1BP1 UHRF1  
UQCC SETD1B  
CCNA2 SKP1  
MAGEA11 PSMF1  
MARK3 ATP6V0C  
CUL2 NEDD8  
TP53 HSPA5  
MME PIK3CB  
CD247 GRB2  
CD19 GRB2  
FRMD6 TSC22D4  
STAT5A BMX  
CD5 PRKCA  
HLA-B PSMD4  
EP300 ANAPC7  
AMPH CLTC  
LGALS8 ITGA4  
RIPK1 LRDD  
HOXC11 SMAD3  
UBE2E1 HERC5  
ZZZ3 MAML3  
PXN PTPN11  
MDM4 CSNK1A1

ARL4D TLE1  
GNG11 GNB1  
TLE1 ATN1  
DAXX SPECC1L  
GP1BA GP9  
PRKACA CFL1  
GRID2 GRIA1  
GRID2 GRIA2  
PIAS1 MSX1  
CCNA1 PTK2  
MAP2K7 MAPK8IP1  
MSN BID  
BAG6 CDK16  
PXN TUBG2  
SEPHS1 C9ORF9  
SNX4 LEPR  
VHL SRPRB  
NTRK2 DOK5  
DFFA YWHAB  
PRDX2 ECSIT  
PPOX HAP1  
SLC22A2 POU2AF1  
RAC1 DEF6  
HIVEP2 BTRC  
YWHAQ LARPI  
IGSF21 CRCT1  
SMAD3 CLASRP  
CDC73 CTR9  
RDBP VAMP3  
TRAF2 USP31  
JUP CDH3  
HCK HNRNPK  
MSN CASP10  
PEX10 PEX2  
TGM1 RARRES3  
RHOG KTN1  
PRKCA GPM6A  
TNFRSF4 TRAF1  
GLI2 SKI  
MCC MCM6

ZW10 ZWINT  
SNRPD2 MEPCE  
MGEA5 CYLD  
C1QA HIPK3  
USP19 CDK1  
ARPC4 ACTR3B  
NFRKB RUVBL2  
RAF1 PHB  
CSNK2A1 FKBP4  
WAS ACTC1  
FKBP4 MUM1  
CCDC14 CEP63  
STAT3 ALK  
AP1B1 AP1M2  
VASP ACTA1  
MAP2 MARK1  
APRT MLH1  
PTPN1 CRK  
HDAC3 YY1  
LAPTM5 UBAC1  
POU2F1CEBPE  
PTPN11 SIGLEC11  
HNRNPK MEPCE  
MAX EP400  
NR3C1 TP53  
SFN JUB  
SUMO2 USP28  
HLA-B VCP  
HLA-B SSR1  
IRF5 CREBBP  
PPARG OPTN  
THOC7 MED18  
FOS GNL2  
ZNF518A ATF7IP  
HAUS6 HAUS4  
CCDC85B PSMF1  
MXI1 MAX  
TRAF2 QARS  
TSN ATG5  
CHMP6 SNF8

IL1R1 SIGIRR  
TNPO2 RAN  
EML4 NEK6  
KIT PTPRJ  
PTPN9 NSF  
UBE2A RAD18  
SMARCA4 HDAC2  
USP8 RASGRF1  
HSPA4 PPP1CA  
EIF2S1 EIF2B2  
HOMER1 SHANK1  
SRRM1 PPIL1  
GNB1 GNG3  
ACP1 SFMBT1  
PPP2R1A PPP2R5A  
ADCY5 RGS2  
GNB1 GNGT1  
SUV39H1 CBX1  
XPOT CAMKK2  
ABL1 HSPA4  
SEPT4 SNCAIP  
PIN1 MAP1S  
ARRB2 RPL7L1  
YWHAQ DAPK1  
PAK1 ZNF564  
HSP90B1 TNFRSF1B  
NUP153 TNPO1  
ADD1 ID3  
RPS14 MAP3K1  
TCF3 CALM2  
TRAF2 DTNB  
EPB41 BCAT2  
SMARCA4 CREBBP  
PLG SERPINF2  
CDK2 RRN3  
TCF4 CALM2  
TEC PTPN12  
HCFC1 HCFC2  
NUP214 CLEC4G  
LCP1 PRKACA

COL1A1 ITGA5  
MMP3 TIMP3  
SPTLC1MAGED1  
PLD2 ACTB  
ALDH3A2 MAP3K10  
RAB1A RABAC1  
UBE2D2 MUL1  
NFKBIE CUL1  
HOXB9 SPZ1  
ERCC1 UBL7  
GRIN2D CDH2  
NCAM1L1CAM  
PARK2 YWHAH  
E2F3 MLL2  
TRIM27UBE2H  
MPND USP36  
ARAF COPS3  
MT2A ITGA6  
APAF1 AVEN  
STAT6 WNK1  
DAND5 NFKB2  
ARPC1B ARPC2  
ESR1 MTCH2  
CCNC MED8  
PIN1 KIAA1429  
CDK1 AMPH  
MAX MXD4  
CDC40 SMURF1  
RARG MAP6  
GNB1 GNB2L1  
PPP4C REL  
PFDN1 MAP3K3  
FGFR3 RNF130  
GNAQ CCR5  
SCNN1D COMMD1  
CDKN1A PCNA  
SMNDC1 RRP1  
POLR3B POLR3H  
GKN1 TP53  
PPP4C GEMIN4

MARS MDM2  
PARD3 PVRL3  
CBFA2T2 NEUROG1  
FYB VASP  
SPHK1 TRAF6  
TOB1 CNOT10  
CLN3 NUP205  
MGST1 COBRA1  
IAPP PCSK1  
TBX3 TOLLIP  
EPS15 RAB11FIP2  
RPL23 MDM2  
ETS2 STAT5B  
TCF3 ASCL1  
MTHFD1 TRAF6  
CTGF NOV  
SLC38A1 APLP1  
PPP2R1A PPP2R1B  
TRIM27MED21  
ZBTB9 ZNF407  
CDK1 AR  
HDAC4 GCM1  
MAD2L1BP IGSF21  
JAK1 SYK  
RBPJ MAML1  
COL1A1 PRELP  
MKI67 MKI67IP  
TP73 C22ORF28  
TNFSF14 TRAF3  
P4HB PACSIN1  
PPP2R1B PPP2R5D  
YWHAZ SAMD4B  
RAD52 TPRKB  
SRF HDAC4  
UBE2E1 RNF2  
ABL1 TMPO  
MAP3K7 MAPK14  
NRP2 SEMA3C  
ZBTB3 ANKRD2  
DDA1 VPRBP

RIPK2 CASP1  
POLR2K MED10  
RAP1GDS1 RAP1A  
ARPC2 ARPC3  
MAP4K4 PACSIN2  
CSDE1 UBE2I  
SMAD3 DACH1  
MAP3K7 CDC37  
WBP4 SNRPB  
SERPINA7 SLC16A2  
SMARCA4 IKBKE  
ITGB1 ITGA11  
TUBB HTT  
KDM2AMAP4K5  
SH3GL1 SH2D4A  
NCOR1 PML  
SH3GLB2 PA2G4  
LCK PTPRG  
LCK PTPRZ1  
NUP98 CREBBP  
PXN ARHGEF7  
SLC9A3R1 PDGFRB  
APC RPS27A  
HES1 SIRT1  
CATSPER1 KRTAP4-12  
LCK PTPRB  
PDPK1 AKTIP  
TWF2 LYAR  
TBP IKZF1  
GIPC1 TAGLN  
KALRN RAC1  
SIN3A KLF16  
PLK1 BICD1  
TNFRSF14 HSPBP1  
SFN ITCH  
MED8 MED29  
TGIF1 WWP1  
PXN GIT2  
FKBP6 NME7  
PTPN2 SFN



SNAPC4        BRF2  
RAD51 OBFC2B  
YWHAZ        WNK1  
MCC    SMC4  
MYB    CSNK2A1  
SMAD1 ANKRD27  
EFEMP2        BAG6  
TRIM27HDAC1  
SRSF4 SREK1  
SLC8A3YWHAE  
TRIM24PGR  
UBE2D1        TRIM31  
RPF1    MAP1LC3C  
SRC    CKAP5  
GNG7    ACP6  
BIRC5    UFD1L  
AMFR    UBE2D3  
PEX19    PEX3  
CDC20    MAD2L1  
FLRT2    FLRT1  
MAP2K7        MAP3K12  
HSPA9    YWHAG  
TRIP10    ASAP1  
ADRBK1        AGTR1  
HDAC3    PCIF1  
TAF10    SETD7  
TBL1X    EMD  
HOXA5    SMAD1  
TOMM20        PPHLN1  
DEPDC1B        UIMC1  
FYN    FNBP4  
ACTG1    TRAF1  
SKP1    GCM1  
AMFR    UBE2N  
MECOM        MAPK6  
DSPP    NFKB1  
ST13    PCBD1  
EEF1A1NEU1  
AHCYL1        ITPR1  
RAB11B        RAB11FIP5

SLC9A3R1 SLC9A3  
NCK1 RASA1  
PRPH2 PRPH  
MAPK3 FCGR2B  
GSN VCL  
SREBF2ZMYM2  
ATN1 ALG13  
PSMC3 PSMD13  
HERC1 RNF11  
UBE2H DZIP3  
HSPA9 SUMO2  
USP11 KEAP1  
HGS ATP2A2  
SOS1 SRGAP2  
HSP90AB1 C12ORF10  
XRCC1 NCAPG  
STAT1 CTNBL1  
AKT1 APPL1  
CHRM4GRB2  
GABARAP PGS1  
HLA-B HLA-C  
SCARF1 SCARF2  
HDAC1 BCL11B  
FASLG DLG2  
CEBPB SMARCA4  
SEH1L NUP85  
CEBPB SMARCA2  
RAD51 EVL  
NCOA1 NR1H3  
GFER ASCC2  
FKBP3 MDM2  
DYNLL1 EEF1A1  
CREBBP EWSR1  
KHDRBS3 SRSF9  
UBE2V2 SUV39H2  
SMARCA5 DNMT1  
AVP11 IKBKG  
RBM39 SRRM1  
AP1G2 XRN1  
TBP SNAPC2

CDC42 RPL8  
CXCR7 GRB2  
PARK2 PARK7  
TUBA1A USP32  
SNRPD1 SREK1  
SOCS1 CXCR4  
KPNA1 LMO4  
RBL2 LIN9  
MEF2C MAPK14  
GPAA1 EIF3E  
CHRNA4 UBQLN1  
EIF1B PARD3  
VAMP7 STX1A  
ARID4A RBBP7  
EIF3G EPB41  
S100A4 BAG6  
ABL2 MED28  
CCL18 TLE1  
SMAD3 GTF2IRD1  
RASA1 AFAP1L2  
CACYPB PRKAB1  
CAPNS1 CAPN1  
SF3A2 KIAA1967  
IRS1 DDR1  
CDH1 PRKD1  
TOB1 CNOT7  
RAB3D RPH3AL  
CHRNA1 CHRNG  
MYC MSH2  
NONO RIPK3  
MYC MATR3  
MAPK10 STMN2  
CREB1 CAMK2A  
PPP2CANXN  
H2AFZ INCENP  
CDK1 CEP55  
CASP4 USP9X  
FGF2 FGFR3  
GIGYF2RBM12  
MAP2K7 EXOC7

DOCK8 RHOJ  
RPS27ANPDC1  
ITGB4 PLEC  
MAP2K7        MAPK8IP3  
GKN1   RIPK1  
ETHE1   RPS27A  
TIFA    NIF3L1  
GLRX3   EFEMP2  
MAP4K4        RPRD2  
BCL6    WNK4  
HIST1H3J      UHRF1  
TNFRSF14      UGGT1  
RGS12   GRM5  
KIF1C   CSNK2A1  
ASAP2   UBC  
AXL     SHC3  
UBE2D1        TRIM8  
ITGA6   BIN1  
YWHAG        FAM65B  
PLCB3   PRKG1  
ITGA4   CD82  
HIF1A   SENP3  
TNFSF11        MMP3  
C8ORF41        PIH1D1  
TUBA4A        SIAH1  
RAC1    CYFIP1  
LDHB    YWHAZ  
EXOSC7        MPP6  
PIAS4   MAP1LC3A  
SMAD7   PARD3  
EDF1    TAF1  
HSPE1   TRAF6  
FAM46A        BCCIP  
AKR1B1        PAX7  
YWHAG        FAM82A2  
VHL     SUPT16H  
PSMA3   PRRC2A  
AKR1B1        HLA-B  
CREB3   MALL  
OTUD1   FLNB

CYP11B1 CYP11B2  
SMAD7 PARD3B  
CTTN CRB2  
HTRA1 PARD6B  
STAT3 PCBD2  
MYB ZFHX3  
TNFRSF4 TRAF3  
TUBB4 KIAA1543  
NGFR NDN  
PTPN13 TRIP6  
HSP90AA1 LASS2  
ZMYM3 HDAC2  
TFRC HLA-B  
ARF6 DHX9  
CDC25B MAPK14  
POLD2 WRN  
PRKCA GABRR1  
SNAP23 VAMP7  
FLT1 VEGFB  
APP CTSD  
FLT1 PGF  
HP CD22  
YWHAZ MEPCE  
ACTN1 KAT2B  
LCK PIK3R1  
DLG4 GRIN3A  
HNRNPR CDK9  
LSM1 EXOSC6  
SLC9A3R1 TRPC4  
ESR1 NCOR2  
ANXA2 VHL  
HDAC1 BHLHE41  
MSN SPTAN1  
SMTN SUMO1  
DR1 TTF2  
AXL PIK3R3  
TFCP2 EIF3A  
CDK4 CSTF3  
RIPK1 RIPK3  
VHL PHF17

RXRA PPARG  
PPM1A SGOL1  
TRAF1 MAP6  
CHMP2B TRAF2  
GNAI3 MTNR1B  
ROBO2 PPP1R1B  
MAP3K3 DIP2B  
SMAD3 PIAS4  
LMNA PRKCA  
NCK1 CD247  
SRC BRCA1  
FOXH1 SMAD3  
RBL1 EMD  
PSMD4 TCEB1  
ADAM10 EFNA2  
STIP1 FKBP5  
SYN1 AMPH  
TGFB1I1 CRKL  
EWSR1 TRPV5  
VPS36 VPS25  
SRP72 MEPCE  
WIPF1 PACSIN1  
FASTK MDFI  
SIP1 U2AF2  
SRC MAPK15  
POLR2E ITCH  
ATG5 MAP1LC3B  
FYN MCAM  
FYN SOS2  
PELI2 UBQLN4  
MTX2 SHC1  
IGF1R PTPN11  
CDC42 RPS27A  
RECQL5 POLR2C  
TRAF3IP3 STK24  
SPTAN1 CEP63  
RECQL5 POLR2E  
HSPA1B HSPD1  
PPL CASP6  
DAG1 AGR3

MAPK1 KSR2  
FYN SOS1  
MAX ZFR  
MYC ADAM9  
F2RL2 F2  
SYT1 STX2  
RUNX1 MYST4  
EWSR1 GPBP1L1  
RPS27ABRSK1  
TRIP13 KIAA1609  
PIK3R2 CCR5  
LDOC1 AP1M1  
BRMS1L HDAC2  
RAP1GAP RALGDS  
CSDA MEPCE  
SMARCC2 CHD7  
BTBD2 BTBD1  
MSL1 MSL3  
IKBKE SMC4  
SFPQ PTBP1  
SMAD1 ZNF423  
HAP1 FAM173A  
PAX3 MEOX1  
PAX3 MEOX2  
FOS MTERFD2  
LYN RASA1  
HMGB1 HES1  
CD247 ATXN2  
BIN1 MYC  
CDK2 BRCA1  
PPP1CASKP1  
CDK5 CABLES1  
ZNF7 MAPK3  
PTPRG NSF  
KHDRBS3 PSMF1  
PLCB3 PRKG2  
NRF1 PPRC1  
PIK3R2 WASF3  
SS18L1 TCF7  
PPP3CCABIN1

SRGN CD44  
EDARADD EDAR  
UCP2 YWHAZ  
OBSL1 TTN  
CEP290 MAPK10  
APOA2 APOF  
CREB1 FHL5  
ARRB2 CDC42  
SET HIST1H2BA  
PCMT1 VHL  
MAP1LC3A TMEM160  
GAS7 HNRNPU  
TRAF2 CYLD  
CTNND1 SQSTM1  
SPARC SDC2  
TOB1 RPS27A  
RPS11 NDN  
LRPPRC IKBKG  
APOBEC1 APOBEC2  
NCOR1 GTF2B  
DGKD MYH2  
KCNJ4 DLG4  
PUM2 NANOS1  
ATN1 LYST  
ORM1 PIK3R3  
MCC DCUN1D1  
PPP2R1A IPO9  
CIITA HDAC4  
BLM BRIP1  
GH2 GHR  
SNCA SQSTM1  
UNC119 ZFP64  
GRB2 ZNF311  
RGS20 GNAZ  
ATP5A1 ATPAF1  
PIK3R1 PPM1A  
CDK2 BRCA2  
SF3A3 CCDC85B  
PRKACA RASGRP3  
USP48 USP21



POP5 BVES  
ENSA ARIH2  
AR RUNX2  
HGF LCN2  
CKM TRIM63  
GIPC1 MCM7  
RPL7 NEDD8  
EEF2 DISC1  
PPFIA4 STAT1  
GUSB PRKACA  
SEC14L3 PSMB8  
CCT3 CDK9  
CHRNA4 VSNL1  
TFF1 UBQLN4  
TRIM25 STK38  
ZNF23 ZBTB9  
PHB SMARCA4  
S100A4 S100A1  
PHB SMARCA2  
HSPA5 TMEM62  
APBA1 LIN7B  
APOBEC1 DNAJB11  
PRKCB MARCKS  
ZFYVE9 ZMYND8  
KRT7 KRT13  
LCK MED25  
PRLR TEC  
TP53BP1 RNF168  
CASP14 CASP10  
PTN CDK5RAP2  
SYNE1 DTNBP1  
TBC1D4 DDX56  
CYCS FTSJ1  
CASP7 MEF2A  
GATA1 SMARCA4  
CRK DUSP15  
DISC1 SNX6  
GAPDH HTT  
HNRNPL PCBP2  
ARIH2 IL4R

PSMD3 FTSJ1  
XRCC6 PDX1  
YWHAQ       ARRB1  
NDUFA7       PRKAB1  
TRAF2 CASP8  
APITD1 DEC1  
GRB2   GLTSCR1  
RBX1   FBXO3  
PARK2 CUL1  
UBE2D1       RNF167  
TUBA4A       MAP1LC3A  
C6ORF15       SV2B  
B2M   LILRB1  
AR     CDC25B  
AR     CDC25A  
YWHAG       RANBP9  
INHBC ACVR1  
IQGAP2CAMKK2  
YWHAG       ERBB2IP  
UBE2L6       ARIH1  
CREBBP       TGS1  
NFKBIE       IL1A  
STX4   STXBP4  
TRIM37EWSR1  
YWHAZ       DENND4A  
SQSTM1       TRIM63  
ETS1   LAS1L  
GNAI2 CCR5  
NOTCH1       DTX1  
AKT1   YWHAZ  
S1PR1 TRIP6  
USF1   WDR5  
SMARCA4       CHMP5  
RPAP2 INTS4  
BSG    UBE2A  
CBX2   RYBP  
KCNA5 ACTN2  
SIN3B   WHSC1  
KCNH4 EP300  
TNFRSF1B       XPNPEP3

ABCD3 MEST  
STAT6 SND1  
ETS1 PPME1  
FN1 SDC2  
MCC OTUB1  
RBBP5 HCFC2  
SNCG GRK1  
MAFG NFE2  
SLC25A12 PHLDA3  
NEBL MYPN  
IKBKE HSDL2  
HSPB1 NFKBIA  
NFYA PAPOLG  
CREB1 ZFP106  
UNC13B RPH3AL  
COX5A HTRA1  
MAP4K1 CARD11  
GRB2 NCKIPSD  
USP53 TRAF2  
PRKCE GPRIN1  
PTN MLLT3  
ZG16 UBQLN1  
GRIN2D TRAF3  
HSP90AA1 TJP1  
YEATS4 RUVBL2  
HSP90AB1 PSAT1  
GRIN2D DUSP4  
CREB1 HIPK2  
PIAS4 SNIP1  
FOS NCOA2  
DR1 NFIL3  
LASS2 NDN  
SMAD2 DNAJC7  
RPS6KA5 CEBPB  
GRB2 SEPN1  
TAP1 PSMB9  
PRKCA GRM5  
USP12 DMWD  
CXCL2 PIK3R5  
OGG1 CHGB

CBX5 PARP2  
CDC34 RPS27A  
EGFR ARF6  
PQBP1 INSL6  
LTN1 UBE2D2  
ATXN1 KIAA2026  
CSTA CTSL1  
SCN4A SNTB2  
SEC24DCDK16  
SCN4A SNTA1  
HNRNPAB DEDD2  
CDC34 RPS27A  
RELA IRAK1BP1  
PRKRA EIF2AK2  
PPP3CAMYOZ2  
ZFYVE9 NIT1  
F2 C6  
FHL2 DPF2  
RPN2 EZH2  
ECE1 MYOC  
YWHAZ PNN  
MED10 MED28  
TBC1D1 UBE2E2  
MED30 MED28  
YWHAE HIST1H3J  
TBP NFYC  
THBS1 LRP2  
CCND2 CDK6  
CCND2 CDK5  
MTNR1B GNB4  
YEATS4 RUVBL1  
FHL2 CREBBP  
TP53 MTHFSD  
PDE6G TRIP10  
CBLB TNFRSF11A  
BGN SGCA  
COPE COPA  
GSN ACTB  
SNAPIN CSNK1D  
ELF4 FBXO7

POLA2 XPNPEP1  
EGFR SNRPD2  
HSPD1 SMAD2  
ARRB1 KHK  
SDC1 MMP14  
FBXL15HEXDC  
C7ORF64 TRIB3  
IGJ IGHM  
MYD88 TLR8  
COPE COPB1  
SMARCA4 MPP6  
UBE2L3 TRIM39  
DAND5 RNF19A  
PIWIL2 DDX4  
EIF1B FSCN1  
MDM2 E2F1  
VCP DERL1  
MYCBPPTCHD2  
CHFR UBE2D4  
IFIT5 TMEM66  
KPNA6 RAC1  
MAPK1 TNFRSF25  
SKIL HEYL  
SNX4 PDGFRB  
DSG2 PKP2  
TGFB1 LTBP4  
RARA ZNF423  
EXOSC9 EXOSC6  
CDK2 VHL  
DCK DDX19B  
ZFYVE20 EHD1  
DYNLL1 ZMYND11  
HBB UPF3B  
ANK2 NRCAM  
RAD23B RPS27A  
MAPK3 RPS6KA1  
SYNCRIP SYT2  
DDX5 YWHAG  
SRSF5 SMURF1  
CREB1 HIPK3

PPARG ZBTB9  
TERT MKRN1  
ZFP36 HOXC9  
FTH1 GOLM1  
COL1A1 COL1A2  
MFN1 TMBIM4  
CTNNB1 PYGO1  
DNMT1 YWHAZ  
PAWR THAP1  
RBX1 SKP1  
SLC9A3R2 LPAR2  
SMAD3 ZMYM2  
HDAC3 PPA1  
LDB2 LHX4  
UBE2I GCM1  
RECQL5 PLK1  
RRAS CRK  
MYC HEATR3  
WASF1 ABI2  
CCR1 PLP2  
ADRBK2 GIT1  
TRAF3 SMURF1  
GOLT1A TMEM120A  
USP7 MARCH7  
MEF2C CCDC57  
SETDB1 CBX8  
PRKAG1 PA2G4  
GNL2 G3BP2  
TRAF5 MAP3K14  
VAV1 TUBA4A  
FXR2 RBPMS  
CALM2 ESR2  
DNM2 PTK2  
LGALS3 C1GALT1C1  
EGFL7 LOXL2  
GTF2F1 BRCA1  
ENSA ABCC8  
HSP90AB1 TAB1  
DEGS1 EIF3E  
MLL2 E2F2

NR2F6 NR2F2  
SMAD2 TGFBRAP1  
SKAP2 FYN  
KIF5B YWHAG  
PTPN12 NEDD9  
YWHAG SRPK1  
HSPD1 IKBKG  
BRCA1 PALB2  
YWHAG PPP1R9B  
TTBK1 HEATR1  
EPB42 EPB49  
PRKAR1A AKAP1  
CTSS SERPINB3  
MYST2 CDC6  
CALCOCO2 SHC1  
RELB RUVBL1  
PPM1B KRT18  
RBX1 ACTG1  
RBM42 PCBP1  
PRKCA HABP4  
CASP2 LRDD  
MYST2 BARD1  
TRIM23 RIBC2  
PRKAR1A ANP32B  
CBX5 HIST3H3  
NR3C1 ANP32A  
COIL NIF3L1  
ADORA2B SLC9A3R2  
YWHAQ TJP2  
NEUROD2 PKN1  
USP11 TRIP12  
CALM2 DLG3  
SYT2 WNK1  
EIF3E NDRG1  
TAB3 TRAF6  
HSP90AA1 PPP5C  
SMAD4 LEF1  
PDIA3 DCBLD1  
GYPC PFKM  
TRIM28 RUVBL2

TAB1 TAB3  
CAPZB MEPCE  
DDX5 MEPCE  
KCNAB2 SLC39A1  
JAK2 PTK2  
TPD52L2 TPD52L1  
HNRNPU PRMT1  
CBX1 INSL6  
KDM1ACDC90B  
KRT20 ZC3H14  
EPN2 EPS15  
HSP90AA1 NR3C2  
AP1B1 CABIN1  
ACTB XPO6  
TRAF2 TANK  
SNAPIN LAMC1  
USF2 PPARGC1A  
CASK ID1  
CASP5 PPHLN1  
DNMT1 DYNLL1  
PLCG2 KDR  
STIP1 CAMK2D  
ENY2 USP22  
RAB3D RIMS1  
DLGAP1 DLG2  
EEA1 RUVBL1  
IRS4 MAP3K1  
SNCG DDX5  
HSP90AA1 MMP2  
IRS4 PTPN11  
FYN ZAP70  
FYN SYK  
NF1 SDC2  
CTNNB1 TRRAP  
CDC5L PRPF19  
RAB38 SMAD3  
NAP1L1 RAC3  
ENPP1 SQSTM1  
TP73 JPH1  
OGT FOXO4



ZNF426 NINL  
NUP93 NEK6  
SOCS2 SOCS3  
SLC38A1 UTP14A  
PDS5A RAPGEF2  
POLR2C CCHCR1  
TARS TRAF6  
APBB1 WASF2  
ARHGDI1 SH3GL3  
HDAC3 CNOT2  
GIPC1 IGF1R  
ERBB3 PIK3CA  
SRC MICAL1  
FASLG TRIP10  
TGFB2 PAK1  
TGM2 SMAD3  
MAPK1 MAPK8  
MEN1 RELA  
TNFRSF1B PFKP  
TMED10 NCSTN  
HCFC1 MLL  
HLA-A HLA-C  
FBL RUVBL2  
KIT SH2B3  
MAPK3 PPP1CA  
FBL PIN4  
PABPC1 NFKB2  
HIST1H3J NR1H4  
NAA38 IL28RA  
ATR WRN  
AKNA WNK1  
SNAPIN MUTED  
UBE2I TFAP2B  
TUBB2A LAMA4  
AIRE SNRPD3  
SELE PXN  
C11ORF16 EWSR1  
TUBB4 TAB1  
TEC ARHGEF12  
ATP5A1 PSMD4

TBL1X GPS2  
CCDC33 EHMT2  
ARAF EFEMP1  
FLNA ARRB2  
PSMC5 RORA  
MBD5 KIAA1549  
VASP RAPH1  
UBE2N ZNRF2  
RAP1A RASIP1  
TFAP2A CASP6  
CSDA HAUS6  
FOS HSP90B1  
MAPK8 DUSP7  
RARA CCND3  
RAB38 SMAD2  
PSMD3 C20ORF24  
RAB38 SMAD1  
TP73 DAXX  
PGAP3 CRY2  
PSMD4 NEDD8  
MID1 UBE2D1  
PRKACB TNP2  
TP53 CDK9  
FBL RUVBL1  
NFATC1 ZNF225  
PSMD2 NFKB2  
SS18L1 ANKRD22  
MON2 GGA1  
EIF3F EIF3B  
CDC42 SYNE1  
BRCA1 CSNK2B  
CYP4A11 PIK3R5  
PSMD2 NDRG1  
CDK1 RAB4A  
CHRNA4  
ATXN3 USP13  
ITGA2BAUP1  
PIN1 RBBP8  
SRC PRKCI  
BAG2 MAP3K14

PAX3 RAD23B  
COL4A3 TGFB1  
PKNOX1 ZBTB3  
CTNNB1 RAPGEF2  
F2 IGFBP3  
FXR2 AP2M1  
SUMO3 CNTN2  
LRP2 ANKRA2  
TAF10 PRPF31  
TRIP12 CARNS1  
XRCC6 CRAMP1L  
CCND3 MCM10  
LPL KIAA1377  
MLL CXXC1  
MYST2 PACSIN1  
EXOC3 EXOC2  
F7 DMWD  
RBFOX2 ESR1  
PCGF2 UBE2Q2  
MYCBP2 WDR48  
PRMT3 FBL  
EIF2S1 EIF2AK1  
HSP90AB1 IKBKG  
HLA-B FKBP3  
PPM1F FAM161A  
ATN1 MDFI  
CLDN1 MMP2  
TADA2A EXOC8  
RASSF9PAM  
CSNK2A2 PIN1  
PPP4C PPP4R4  
TBP BRF1  
NFKB1 FBXW11  
PCNA CCND3  
ACTB BBS4  
HLA-B PSMD1  
RGS20 GNAI1  
VPS13DMADD  
WNK1 WWTR1  
VWF HSPA5

UBR5 SMAD2  
EGFR PRKCD  
PARP1 PRKDC  
HUS1 ALDOB  
UBE2D1 TRIM35  
HNRNPA2B1 CDK9  
CSNK1E YWHAH  
VHL MYL6  
CSNK2A2 EIF4EBP1  
PARP1 PIAS4  
NR3C1 HSPD1  
NAPA STX5  
TP53 FKBP3  
RNF103 UBE2H  
EEF1A1 SRRM2  
OXSR1 FTSJ1  
CSNK2A2 HDAC1  
PDPK1 AKT3  
PDGFRB PTPN11  
DERL3 AMFR  
TP53 RPL5  
CCDC59 PAK7  
TAF11 TAF9  
TRPM2 ITPR3  
NR0B2 NCOA3  
CS CRYAB  
TGIF1 CTBP2  
RRP12 DDX56  
CENPF SNAP25  
ITGB3BP KIAA1377  
RPS6KC1 SPHK1  
ZNF225 PSMA3  
PSMC3 HIF1A  
ACTR2 TNIK  
NOL3 CASP8  
NCK1 ECT2  
SIN3B ZBTB16  
ACTN4 HDAC7  
USP32 VPS35  
CCND1 GSK3B

PLOD3 DPPA2  
HNRNP2 GPN1  
HDAC3 TAB2  
MYOG ELSPBP1  
MYC SKP2  
KIAA0182 NR2E1  
ATP7B DCTN4  
CD1B B2M  
LRSAM1 UEVLD  
TRAF3 EDA2R  
KCNH4 CTNNB1  
SYT1 ZDHHC17  
GATA2 MAPK1  
MRE11A ATR  
PEX11A PEX19  
ARL3 RP1L1  
RRAS2 SMAD4  
G3BP1 NOL6  
PDGFRB PDGFRA  
SH2D3C CARD11  
H3F3B KDM4C  
NEFL GPRIN1  
SLC9A3R1 SLC4A8  
SMAD4 OCLN  
TARS PRKAB1  
XRCC1 CCNO  
SLU7 PPIL3  
CDK8 CDK9  
POLR2L MED28  
TF IGFBP3  
DRD3 NCS1  
GRN ATN1  
ATP2B4DLG4  
CAPN1 FHL2  
BLM FANCD2  
C7ORF64 CDK5RAP2  
MYC PFDN5  
RFX3 RFX6  
PSME3 MDM2  
RPAP3 PIH1D1

CNTN1 TNR  
TP53 DEPDC1B  
IGF1R IGF1  
KRT85 PLEKHB2  
POU2F1STAT5A  
CCT4 MAP3K1  
CLDN4 TJP1  
GAS7 MAP3K3  
SNX3 EPB41  
FKBP4 DDA1  
MAX RANBP9  
RELA TIMM50  
PTPRM PCSK5  
TCP1 TUBA4A  
EIF3A WDR48  
DSCAMPAK1  
LRPAP1 LRP2  
GSTM4 MED31  
ITGA5 ANGPTL3  
RNPS1 DHX38  
GYS1 OTUD5  
TLE1 LEF1  
APLP2 ZNF512B  
LRPAP1 VLDLR  
EIF1AY ATXN1  
RAB8B RAB3IP  
CD53 CD9  
ZBTB16TRAF2  
CPSF7 EWSR1  
RARA NCOA3  
LCK MUC1  
CYCS TRAF6  
FGFR2 CACNA1D  
HP CD163  
MED14 MED19  
UBR1 DNAJB11  
LDOC1 POLL  
E2F7 RUVBL1  
HMGB1TAF1  
SH2B2 SYK

BRMS1 ING1  
RPS6 NDRG1  
LDOC1 PSMF1  
PYGM MAP3K3  
EGFR SH3BGRL3  
SMAD2 LITAF  
NR3C1 MDM2  
TGIF1 IRF2BP1  
HSP90AB1 NFKBIB  
UBE2I PDLIM7  
APBB1 LRP1  
PPP2CAPRKCD  
SRP14 ARF6  
DPEP3 BCL11A  
GGA1 RNF11  
YWHAB SNCA  
TAF11 TAF12  
MLH1 ATAD3B  
PSMB6 PLK1  
DVL2 DAAM1  
UBA52 UBE2O  
TNNI3 PAPP  
CIAO1 CCDC7  
TUBG1 TUBGCP4  
CALCOCO2 GABARAPL1  
IGFBP1 MMP26  
RPS27AZBTB16  
EIF1B EIF3K  
GSK3A PRKCZ  
GABARAP RNF123  
RFXANK ACTR6  
TRAF2 TNFRSF12A  
THBS1 TNFAIP6  
CSTA CTSB  
TECPR2 GABARAP  
TRIM27UBE2O  
SHC1 RANBP9  
SRF KCNH4  
IPO7 TNFRSF1B  
TPR YWHAQ

EXOC3 DLG3  
APITD1 FANCB  
LZTS2 NINL  
SLC3A2SLC7A11  
UBE2I RNF111  
PTPN11 MVP  
ZNF423 EBF1  
GRB2 CELSR3  
HSPD1 GRB2  
ZNF764 SUFU  
BCL9 CDC73  
PRSS23 NOC4L  
KCNJ10KCNJ16  
ACTA1 FGD4  
RNPS1 ZC3H18  
EXOC4 BIRC6  
TRPC1 HOMER3  
TKT VHL  
MCC C4ORF43  
FASLG MLL  
PER2 CSNK1E  
MYC MYCBP  
IPO9 RPAP1  
ELF3 PSMD6  
DHX15 YWHAB  
BCKDKRNF219  
MCRS1 TTN  
C12ORF35 EXOC1  
MTOR EIF4EBP1  
PPIA PPP3CA  
LMNA LMNB1  
EED SUZ12  
HSPA14DNAJC2  
TSC22D1 FANCI  
SRSF1 DIDO1  
FABP3 VPS28  
INHBA INHBC  
MYST2 HIST1H3J  
MED30 PCBD2  
PSMC2 PSMC4



PLSCR1 EFEMP2  
SUPT7L CDCA4  
BCL3 GTF2A1  
ARL3 UBR1  
DFFA MCC  
TBP HSF1  
PRKCB ANXA7  
SPRY2 TRAF2  
CUL2 TCEB1  
NFKB1 ESR2  
MED26 POLR2H  
UBC CYLD  
CDC34 RBX1  
RTCD1 BCKDK  
BTK TLR6  
CD3D CANX  
ARF1 PLD2  
SAV1 RASSF1  
CUL2 TCEB2  
MLNR MLN  
TGFB1 KLHL35  
TSR1 LYAR  
MAPT HSPA4  
PPP4C RELA  
CYC1 CLN3  
TNF PTPRZ1  
IGF1 IGFBP5  
RPTOR MLST8  
HDAC3 STAT3  
CXCL10 CXCR3  
TIMM23 TIMM50  
IGF1 IGFBP6  
GNAS TTC1  
RIPK1 TRADD  
PRKAB2 MAST3  
EPB41L2 YWHAH  
HDLBP DHX9  
TUBA3C TRAF6  
UBE2H CBLC  
ARHGAP44 HN1

YAP1 TP53BP2  
ATG2A BRE  
CALCOCO2 C16ORF48  
PARP1 TAL1  
YWHAB WDR20  
ACVR1 TTC27  
TTBK1 TTBK2  
TP53 MSH2  
KRT82 DNPEP  
MCM3 YWHAZ  
HLTF UBE2Z  
MCM6 ING5  
GNAQ PLCB2  
ZNF225 CREBBP  
ATXN3 KAT2B  
SUMO3 SOX10  
ESRRA MACF1  
MGRN1 UBE2T  
BCL2A1 BOK  
PRKAR2B AKAP4  
CAT SUMO4  
EIF1B CDC37  
CALM2 TANK  
POLR3A GPN1  
TAF11 LZTR1  
TUBA3C RIPK3  
LDLR HSPA5  
ENTPD1 RANBP9  
ANXA1 SUMO2  
GABARAPL2 ATG2A  
EWSR1 VPS72  
FYN KHDRBS1  
MAGEB2 USP7  
SMARCA4 SMARCD2  
CCDC113 GIT1  
PPP2R1A PLA2G16  
SMARCA4 SMARCC1  
PSMF1 FBXO7  
SDHB MCC  
SMARCA4 CHD4

BBS4 FHOD1  
F2 SERPINB8  
YWHAB OTUD7B  
KDR IQGAP1  
PGK1 SH3GLB2  
AHR RELA  
UTRN USP21  
CEBPB MED23  
SMAD2 STAG1  
LYN GRIA3  
TRIM37ZNF417  
RBX1 FBXO11  
PPP2R1B PRDX2  
ADD1 ID2  
IQGAP1NFKB2  
RIPK2 IRAK1  
SGK1 MARCKS  
TAF4 HTT  
PPP2R3A PPP2R4  
HIVEP1 ATXN1  
TCEB1 PAN2  
UPF2 INTS6  
MYC RAF1  
GFAP ROCK1  
THY1 LCK  
BMPR1A FSTL1  
PSMD7 IKBKE  
MAPK3 RPS6KA2  
PSTPIP1 PTPN12  
CD28 ITK  
RPAP2 ITCH  
FOS BAG6  
SNAP23STX11  
SHBG DES  
MAN2B1 SMAD9  
PLD2 GRB2  
U2AF2 SRSF11  
BACH1 HDAC1  
LMO4 MERTK  
ID4 GRB2

HLA-F B2M  
MAPK1 SNCA  
SETDB1 DAP  
DLG3 GLS2  
BCL3 NCOA6  
PAPOLA KPNB1  
HSP90AA1 AR  
PIP4K2A RAC1  
HINT1 TRIM29  
ARID1A MLLT1  
DBI TSPO  
GADD45G GADD45GIP1  
PCNA PPP1CC  
THY1 FYN  
FOS RPS6KA1  
GTF2I HDAC1  
ADCY8 PPP2CA  
POLR2E GTF2B  
TRAF2 TNFRSF14  
CDC5L TTF2  
SMAD2 PREX2  
CLOCK SIRT1  
RABIF CCBL2  
TOP2A HDAC2  
EGFR MAPK14  
PTPRC GRIN2B  
MRPS14 IKBKE  
IKZF1 IKZF3  
MSN TSC1  
RPL23 WIBG  
SP3 HDAC1  
PRKAR1A MAP1LC3B  
MAGOHB AMOTL2  
TRIM27 UBE2D2  
NPM1 HIST3H3  
TLR2 PIK3R1  
MET FAS  
TBXA2R PRDX4  
HSP90AB1 TRADD  
NCK1 ISG20L2

LAP3 DDA1  
STAT5A MAGEA12  
OLFM3 MYOC  
CNBP DHX9  
OSBPL10 CLPB  
PRKCA DDX5  
BCOR CPNE2  
EFHC2 EXOC8  
AKR1B1 MCC  
UBE2E1 POLL  
HNF4A MED16  
HSPA5 RUVBL2  
IKZF1 IKZF2  
USP11 CBX2  
TOP3A APITD1  
GLI1 YWHAE  
KLF4 KCNH4  
KIDINS220 MOBKL3  
BCL2L11 MEX3D  
SCRIB GIT1  
GDI1 PACSIN1  
SLC38A1 FUNDC2  
PAFAH1B3 EEF1A1  
CIITA ZXDC  
SERINC3 PTPLAD1  
EEF1A1 ANKRD24  
PRDM1 HDAC1  
SMAD1 INPP4A  
CS CRYAA  
ACTA1 XIRP1  
IPO5 RPL5  
ITGA5 AUP1  
C7ORF64 FXYD6  
SERINC3 PHB2  
ATN1 PDCD6IP  
H3F3B RNF41  
CD28 NSF  
SLC27A2 YWHAZ  
CKMT2 UNC119  
TIE1 ANGPT4

TCEA2 AKT1S1  
COIL NUDT18  
RBX1 KEAP1  
MCM7 GIPC1  
PPP3CAMYOZ1  
PFKFB2GK  
HUS1 STRAP  
HTR1A S1PR1  
HTT WDFY3  
SMAD2 KIAA1109  
PTK2 RHOU  
ITGB2 ICAM3  
UBE2I DEC1  
CHMP2A EIF2B5  
CCDC158 SH3GLB2  
TRPM2 TRPC6  
TP73 RPF1  
PPP4C SMEK1  
UBE2Z RNF150  
TP73 YAP1  
LMO4 ZNF675  
COX6C GTF2F2  
MYOD1CALM2  
CCND1 TSC2  
MYH10 TRPM7  
CDKN2C COPS6  
TRIP13 PLAC8  
SUZ12 H2AFY2  
HLA-B DNAJA1  
CAPN1 BCL2L1  
TNFRSF1B SERPINB3  
FIGF ITGA9  
MAPK8 RHOA  
NUP93 BRF2  
HSPA4 VCP  
FGR CSK  
MAP1LC3B RASSF1  
ING5 PHF15  
PIK3R1 MST1R  
CHD3 CASP8

PTPRC SLAMF1  
CDKL5 FYN  
GRINL1A AHSP  
DLG2 CACNG2  
ATP2B2DLG2  
DDX58 MAVS  
AR DAP3  
NFKBIA NFKB2  
IL17RB TRAF6  
CTNNA1 SOS1  
DSC2 PKP3  
PRKACA MAP3K3  
GSN ARRB2  
SF3A2 RETN  
CRK RIN3  
IQGAP1YWHAZ  
WASL ACTR2  
EEA1 GIT1  
SMC2 NCAPD2  
VCP NPLOC4  
ACTC1 BRP44L  
PAX1 MEOX1  
PPFIA2 CDC5L  
THRB RXRB  
RASL11B EWSR1  
ACTC1 KPTN  
SHC1 CSK  
HDAC1 DEC1  
STX2 STXBP1  
EFTUD2 SRRM2  
FAM96B PHLDA3  
KLK3 PZP  
C5AR1 GPR77  
PIK3R1 PEBP1  
CUL1 KEAP1  
FER CALM2  
PAX1 MEOX2  
MYB SUMO1  
DVL1 SMAD3  
TNFRSF10A TNFSF10

EIF5B CBL  
PGLS EWSR1  
PDLIM1 EIF1B  
PSMD1 TNIK  
APEX1 HDAC1  
STAM PLCB1  
DNAJB2 UBQLN1  
YWHAB PARD6B  
MDM2 SET  
CEBPB EP300  
IFT20 EXOC7  
PTPN11 FCRL3  
PSAP CD1B  
CDK1 CCNA2  
NPHS1 IQGAP1  
SREBF2ZNF639  
EIF3H CCDC85B  
SEL1L UBE2J1  
CDH1 EP300  
ARAF CPS1  
RPRD1B TUBGCP4  
VIM ALS2CR11  
MARK4USP21  
ZNF76 SMAD1  
BCL2A1 BAK1  
ABLIM1 YWHAG  
STAT1 MAPK14  
ESR1 LMO4  
C5 CPN1  
MYH9 ASCC2  
GIPC1 KIF1B  
ARR3 OPN4  
CHN1 CDK5R1  
SDCBP PTPRJ  
VIM ROCK1  
CPSF1 GLIS2  
BTG3 BANP  
APEX1 HOXC13  
VIM NFATC2  
RFC2 RFC5



MYC MNT  
PRNP CSNK2B  
PIN1 ZMIZ2  
CENPA CENPM  
RPS6KA3 STK11  
GRAP2 LAX1  
SYK TRAF6  
EMD LMO7  
RUNX1 EP300  
GSS IRF3  
NR2C1 NRIP1  
COPE RCHY1  
RPN1 UBQLN4  
ACTR1A SPTBN1  
PGAP3 TIMELESS  
CAD RIPK3  
TP53 S100A8  
TSC22D1 RBFOX1  
CAMK2G CABP2  
IL5 IL5RA  
EWSR1 LILRA3  
CUL4A DET1  
ATAT1 GRN  
RRAS2 TRAF3  
KLHL9 USP25  
ATG13 GABARAPL1  
PLCG2 FCER1G  
FCHSD2 C2ORF73  
TGFB2 EIF3I  
MDM2 POLE  
ACP1 TNIK  
TWIST1RABGAP1  
PIAS1 PPARG  
BMX RUFY2  
SERPINA1 PRTN3  
TP53 CDK5  
CD2 CD2AP  
TFG ARL15  
TLE1 CRCT1  
KLF7 FBXO38

EPB41 SPTB  
NTRK1 MATK  
ERBB3 PIK3R1  
PPP2R1A HSF2  
MCC UGGT1  
GALT TRIP13  
RAB11FIP3 RAB25  
FGA ITGA2B  
NOL4 CTBP2  
TDG SLC7A9  
CDC25A YWHAE  
SEC13 CCNA1  
SMC2 NCAPH  
NCK1 POLR1B  
SHC1 TEK  
EXOSC2 MPP6  
PTPN12 PTK2B  
EIF1B EWSR1  
EIF4A3 C3ORF19  
CHEK1 AKT1  
LRP2 DLG2  
VIM XRCC4  
FECH USP42  
PRKACA TPH1  
HDAC1 DACH1  
ITPR1 TRPC4  
MCM3 HLA-C  
MAPK9 MAPKAPK5  
HDAC4 MEF2D  
TNFRSF10A BCL10  
ZNF646 NINL  
FOS ETS1  
DLL1 CNKSR3  
GRIK2 LIN7B  
PDGFRB KRTAP4-12  
CHGB OGG1  
VAV1 ARHGDIA  
RARA NR2E3  
VAV1 ARHGDIB  
SSSCA1TRAPPC6A

PTPRC LCP2  
POLR2H MED19  
MAX TUBA1A  
RSL24D1 DNMT3L  
PARP1 USP36  
EPS15 UBE2D3  
TRIM23 TRIM6  
TSC22D1 TTC27  
PRSS1 SERPINF2  
TBP NACA  
TESC HMG20A  
IMPDH2 SUMO4  
NBN XRCC4  
PARP1 NEDD8  
RPL5 MAP3K14  
CRKL SOS1  
IL10 IL10RA  
NOP2 SUMO2  
CYP27B1 GABARAPL1  
KIF3A MAP3K11  
RNF43 UBE2D4  
USP45 ZFR  
CDK4 CCND1  
TNIK MRPS16  
VARS VHL  
PRKAR1A MAP2K5  
TFAP2A CLTC  
AKT1 GAB2  
SLC3A2NEK6  
BRCA1 MED23  
UBE2I TOPORS  
MTMR3EXOSC8  
IL2RB IL15  
AP2B1 ACVR1  
CBX5 MBD1  
TRIP13 SEMA4G  
RAB11FIP3 RAB11B  
PDPK1 PTPN22  
YWHAG NEDD4L  
RGL2 RALA

UBE2A ETNK2  
EZH2 DNMT3B  
MYBPHMYBPC2  
STAT5A SYK  
TPM1 ACTB  
JAK2 PTPN12  
GSK3A PRKCD  
FSHR AKT2  
RHOA RTKN  
MYC TRIM28  
FOXO4 USP7  
GRB2 GARI  
TNIK STRAP  
MYB LIN9  
HRAS ZBTB12  
CASP2 PRKDC  
TCEA2 EAF2  
ARFIP2 ARF6  
HNRNPU SREK1  
ACTL6A MAP3K8  
SLC38A1 MRPL9  
ORC2 MCM6  
RAF1 SRC  
C9ORF100 RBPMS  
LDOC1 UTP14A  
MAP4K3 OSTF1  
CTNNB1 AXIN2  
NFKB1 STUB1  
PLD2 CFL1  
CHAF1A SETDB1  
MYC NMI  
EFS SORBS3  
MC3R ASIP  
PIK3R1 NTRK2  
H2AFJ CENPA  
BCAR3 RPS29  
EIF1B NAA50  
EIF3F EIF3M  
FOXM1 ZBTB3  
TRIM28SETDB1

MSL1 MYST1  
ZBTB3 ZNF556  
CUL4A COPS6  
TAF12 TAF9  
EMD SH3GL2  
EMD SH3GL3  
RALB CALM2  
RPS6KB1 PIN1  
TRPC1 CAV1  
DBP HLF  
NKX3-2SIN3A  
CAD TRADD  
KDM1BBAP1  
LGALS3 CSNK2A1  
LYN MATK  
RPS27ASLC6A3  
PRKCE GAD2  
NANOS3 AKT1  
KAT2B ONECUT1  
FOS RPS6KA2  
C5AR1 ARRB1  
NADSYN1 UPF1  
NR3C1 CALR  
FGF7 DUSP3  
PSMB5 PLK1  
ADD2 CALM2  
HCK ADAM15  
MYCBP2 PTPN12  
NCK1 FASLG  
GABARAP UBA5  
GTF2F1 TAF11  
EIF2B1 EIF2B3  
GOLM1 EIF2B3  
EPB49 PROCR  
LYN TEC  
PTPRC PDGFRB  
CASP2 CRADD  
BACH1 PATZ1  
RAP2A TNIK  
MAP4K2 MAP3K11

EWSR1 DHX9  
ACTA1 LASP1  
UNC119 CDC42  
RPS6KB1 EIF4EBP1  
SALL2 ZMIZ2  
FOXO3 H2AFX  
TSC22D1 SFXN4  
CREBBP TRERF1  
AKT1 MAPK8IP1  
RARA NCOR2  
ARL3 INSL6  
ARL14 SMURF1  
MYC COPB2  
PSEN2 RNF32  
ADRA2B YWHAZ  
EWSR1 C10ORF12  
SNRPB SART3  
SLC5A1PAWR  
RASA1 CASP3  
EWSR1 SALL2  
CTNNB1 BTRC  
NUP93 GIPC1  
CASP9 CASP10  
MYD88 CISH  
ACVR1 STX8  
KCND1 KCNIP1  
AP2B1 ITSN1  
ADAMTS2 PIK3R5  
SNRPB EFTUD2  
SMAD6 RPF1  
ORC3 ITK  
SMAD3 CXXC5  
MED28 MED29  
CCDC127 RNF11  
TAF5L TAF10  
TUBA4A HDAC6  
PTGDS PTGFR  
PARP1 LZTR1  
FYN NKX2-1  
NFKBIE NFKB2

EXOC4 DLGAP4  
ETS1 C1ORF52  
SSR1 BRF2  
COCH IFI27  
SEL1L AUP1  
CHD3 SRRT  
PAFAH1B1 NDEL1  
ATG10 ATG5  
SRSF1 DYRK1A  
ADSS ACTA1  
PRKAR1A CRB1  
C2ORF18 NDUFA4L2  
TP63 BTRC  
S100B TP53  
YWHAZ KLC2  
VAV1 RHOG  
TAF1C TAF1A  
MSX2 PITX2  
SRC GFAP  
CDC45 MCM6  
TGFB1I1 MAPK15  
ESR1 POU2F1  
RBM5 INSL6  
DDX3X MAX  
SERPINE1 LRP1B  
DMWD CDC37  
KIF5A YAP1  
CLU TGFBR1  
RBX1 ZC3HC1  
SETDB1 THAP8  
AIFM1 HSPA1B  
PRKACG TNP2  
MSH3 SLX4  
MATR3 RUVBL2  
YWHAB CRTC2  
SOS1 SRRM1  
EGFR FAS  
LRPAP1 SMAD2  
EP300 NEDD1  
CSF2RB PTPN11

RHOA RHPN1  
PARK2 SLC6A3  
HIST2H2BE ARID1B  
NR3C1 NR2F6  
EGFR HIST3H3  
CDK9 TUBB2C  
CUL4A PHLDA3  
CTNNB1 RUVBL1  
SOCS5 ALK  
GTF2I SRRM1  
SAFB TJP2  
DAB2 INPP5D  
SIP1 SRSF1  
MYC ACTB  
AXIN1 HBM  
BTK DAAM1  
TRIM23LNX1  
MAP4K3 COPS5  
NDUFA7 ELAC2  
TNFAIP3 TICAM1  
IHH PTCH2  
FGFR3 SMG7  
HLA-DQA1 HLA-DQB2  
TAF1C TAF1D  
NAPA TRPC3  
GRIN2D DLG4  
CRKL SOS2  
OLFM2 FANCF  
EWSR1 CPSF7  
PSEN2 NCSTN  
SLC25A6 GNB2L1  
CBR1 FTSJ1  
DAND5 SRY  
TRAF3IP3 MOBKL3  
FLNA PIK3R1  
PPP2R1B PDCD10  
ACTN4 MAP3K3  
CRK DPPA4  
GATA1 HDAC1  
CDH1 PTPN14



IL3 IL3RA  
LMO1 NHLH1  
AP2A1 DEK  
SUZ12 WDR77  
IKBKE DDX21  
NPM1 FANCC  
CREM KCNIP3  
VCL TRIP6  
PTPN6 CTNNB1  
CTNNB1 TLE1  
ANXA6 RASA1  
NR3C1 TXN  
REST RNF2  
PELI2 IRAK4  
DHX9 TNFRSF14  
RARA PRDX6  
FHL2 TRIM63  
RAC1 UNKL  
YWHAE MAP3K1  
DNM2 SORBS1  
VAMP2 STX3  
STK32CRPRM  
CDK2 E2F1  
PGK1 DISC1  
PTPN6 SLAMF6  
NOS1AP PTPRN  
CEBPE GTF2A1L  
INHBA ACVR2B  
EIF2S2 EIF2B3  
CFL1 ACTA2  
SMAD3 GGA1  
NOS1 DLG2  
LEPR GRB2  
GTF3C1AKTIP  
ACTC1 SCIN  
YAP1 HNRNPU  
TFRC SH3BP4  
EFEMP2 SGTB  
PHB SGIP1  
COMMD3 ZNF337

YWHAB PARD3  
KPNA1 ELAVL1  
C17ORF61 FAM45A  
SLC25A37 ID2  
TEC MED28  
HSP90AA1 DAND5  
SRRM1 RBM8A  
IQGAP1RAC1  
PTPN4 GRB2  
HDAC1 BAZ2A  
CRIP2 PRKG1  
MAP4 MARK1  
MAPK6 ZCCHC8  
AURKADPEP3  
CD46 ITGA2  
EXOSC2 EXOSC8  
DPY30 ASH2L  
IGF2BP3 CNBP  
SLC16A4 BSG  
MAP1A MAP1LC3A  
SIP1 IKBKG  
NFYA ZHX1  
RASSF5TERF2IP  
APC MBD5  
COBL PACSIN1  
BRCA1 CSTF1  
YWHAZ SRGAP1  
JAK2 CSF2RB  
DPPA2 DVL3  
LZTR1 KDM2B  
MAPK3 PTPRR  
NRP1 SEMA3C  
MYC PDS5A  
PCBD1 CPLX2  
SNCA PLD1  
TUBG1 CTBP1  
STK19 POLR2G  
NOS1 RASD1  
GRID2 DLG2  
TGFB1 MAPK14

INSL6 SPG7  
CASP3 SREBF2  
YEATS4 KIAA1009  
TIMM23 BRF2  
STAT5A STAP2  
ZFPL1 ATP5J2  
HDAC3 NFKBIA  
DOK2 DNAJB11  
SMAD3 CFDP1  
COPB1 TAP1  
MAPK3 PTPRK  
PTN GLYAT  
PRUNE2 RCN3  
RUNX1 SMAD2  
RUNX1 SMAD1  
GSTP1 MAPK8  
ACVR1 USP39  
PSMF1 RNF126  
PRKCA AKAP5  
TRIM41IKBKG  
TRIM27NFYC  
ERBB3 BCAR3  
YWHAQ MTNR1B  
UBL4A CDK9  
HAP1 GLTSCR2  
SGK1 IARS  
UBR7 UBQLN4  
SRSF2 HABP4  
PTPRC PPFIA1  
POLN POLDIP2  
ABP1 FGD1  
HCK PIK3CB  
LZTR1 RERE  
PDXK YWHAZ  
PKN1 HDAC5  
STAT3 ZNF148  
ZCCHC10 LUC7L2  
GEMIN4 DHX9  
BRCA1 UBE3A  
PRTN3 F2RL1

STAT5B EP300  
CCND1 CDKN1C  
PTPN6 PTPN11  
FABP3 NR4A1  
TCEA2 CENPT  
WWP1 IKBKG  
AURKAAURKAIP1  
PSIP1 HCFC1  
CYCS TNFRSF10D  
GPT2 USP20  
NHP2 LYAR  
NPM1 YWHAZ  
CAND2 TBP  
DAND5 MEF2D  
GTF2A2 TBPL1  
XRCC6 GAL3ST4  
PRMT5 CLNS1A  
FN1 THBS1  
APP CASP3  
ZFPM2 UBQLN4  
BNIP3L DOK5  
GNPAT RAB35  
STX5 COG4  
PPP3CACRTC2  
SRP54 SERP1  
RPA2 KIAA1377  
CRYABCRYBB2  
TJP1 MAGI3  
CNN1 CALM2  
PAX2 BBS4  
CTNNB1 CBY1  
CEP350 PLEKHA5  
PAK3 MYO6  
TDP2 SKIL  
TUBB4 YWHAG  
MYL1 ACTA2  
ABI1 CBLB  
STAT2 EP300  
PARP1 SENP1  
GPC1 GRB2

DVL2 THAP1  
HOXA11 HDAC2  
DFFA EWSR1  
MYO7ADFN31  
RBX1 FBXO31  
MEPCE ARHGAP23  
TUBG1 RPS27A  
DDIT4 BTRC  
DNAJB1 ECSIT  
UBC IRAK1  
ARL1 GOLGA4  
MAP2K4 ARRB1  
RPL7 RAN  
YAP1 TP63  
ETS1 TTC3  
BIRC5 KCNJ6  
PFAS TRAF6  
PXN PARVA  
CCR5 CXCR4  
IMPDH2 ARF6  
SH3KBP1 FAM125A  
RB1 CCND1  
MINK1 KIFAP3  
HNF4A NCOR2  
PCNA PRDX6  
CDC5L SRRM2  
RELB COMMD1  
RAC3 DDX46  
HSPA5 CAV1  
F2 PLAU  
TOP2B TOPBP1  
F2 F9  
MYC ZBTB17  
LCP1 CNN3  
MYST2 ING5  
CD3D RPS27A  
IKBKE CYLD  
BAG2 MAP3K3  
ACTC1 SYNE2  
PPP1R7 PLCB1

ASNA1 SEC61B  
TBP CKLF  
SRF RXRG  
RPL10 MAP3K1  
TNFSF11 ZNF675  
F2 PLAT  
SSSCA1IL16  
MRE11A ATM  
DDX11 DSCC1  
RBM34 IKBKG  
VIM CAMK2D  
ZNF10 NDEL1  
RCN3 PRUNE2  
TUBA3C IKBKG  
MED28 MED9  
HSPA4 HSF1  
SPTBN2 MAP3K10  
PAPPA SMAD2  
MLH1 RPS16  
NPM1 H2AFX  
TAF2 TAF8  
TRPV1 ITCH  
PARP1 RNF4  
CDC42 DOCK8  
IFIT3 CDC37  
CSNK1G2 SMAD3  
C19ORF60 MDFI  
NUP214TNPO1  
PRKDC KAT5  
TXN NCF4  
ALDH2 CRMP1  
BAX TOMM22  
PRKAR1A PLEKHF2  
STAT3 RELA  
WASL WIPF1  
TRIM6 TRIM5  
HUS1 FBXL15  
TPT1 RBBP6  
CAMLG PARD3  
CDKN1B RNF123

NOS1AP LRP2  
HPS6 MARK4  
XRCC5 CD40  
CYCS RNF7  
UBC CDC42  
SLC25A4 TNFRSF1B  
XRCC6 NR1H4  
HSBP1 CCDC53  
POU2F2TBP  
CENPA CENPI  
FGA SERPINF2  
PRPF40A UBR4  
SKP1 FBXO46  
RFWD2 COPS8  
HSPA4 BRMS1  
PSMD12 PSMD4  
HOXB13 ZNF490  
HLA-B B2M  
TWF2 KRT82  
SNW1 PABPN1  
NEFH WNK1  
ZFYVE9 EIF4G1  
NR3C1 ETS1  
GOT2 PSMD4  
ITGA5 CBL  
AIFM1 TSC22D4  
GRIA2 SPTBN1  
FLNA MTNR1A  
GABARAP TFCP2  
TNF CSF1  
NFATC2 NFATC2IP  
PDPK1 PRSS23  
GTF2E1 TAF11  
SPI1 SIN3A  
GNAI2 LPAR3  
PLG MMP3  
SF3B1 SMNDC1  
IKBKB EIF2AK3  
ZBTB16 TRAF2  
STX7 STX6

CSNK2A2 ERH  
HSP90AB1 RPL7  
MCC KCTD12  
NFKBIA HDAC4  
SYK SLC6A20  
IKBKB TRPC4AP  
KCNH4 TAOK2  
HIST1H4I DYRK1A  
CSTA DSPP  
INSL6 ANKRD24  
RPL27ASUMO1  
TNIK CNPY2  
MED28 MED20  
RET AKAP5  
GPN1 GPN3  
RPAP3 PDRG1  
NR4A1 MYBBP1A  
NAA38 GTF2I  
COPS4 COPS7A  
SLC3A2BRF2  
SYT1 SYT4  
GRB2 PAG1  
MYBL2 LZTR1  
COL6A2 DISC1  
MOAP1 TRIM39  
CENPE SKA1  
TBP GTF2B  
HLA-B CYCS  
PLK1 ANKRD33  
ARRB1 TRAF6  
ELL HNRNPU  
BNIP3 HDAC1  
HOXA11 CREBBP  
NBN ATR  
PAX3 HDAC1  
MYST2 KCTD13  
PTP4A3 KIAA1279  
AKT1 RAC1  
NPM1 SWAP70  
NCF2 CDC42



EIF4G2 OPTN  
PRKCD PLD2  
LYN CASP3  
SNX1 SNX6  
HDAC4 PPARC  
SIN3A HDAC5  
TULP2 MEOX2  
SAP30 TAF6  
VIM TJP1  
WWP1 KLF2  
UBE2E1 ZNRF4  
S100A4 METAP2  
RPS11 MAP3K14  
MYC MAPK7  
CSNK2B PRKCZ  
TADA1 TAF9  
F2 HGFAC  
UEVLD GALM  
SMARCA5 SOD2  
DPEP3 TAF6  
EIF3E TNFRSF14  
TARS PRKAG1  
ITGB2 PLAUR  
DMWD NDUFA5  
VAV1 SHC1  
MYO1BEIF4A2  
VAV1 PTPN6  
GPRIN1DLG2  
PRKCSH IKBKE  
VDAC1 TOMM20  
CCT4 STRN3  
CBX2 MDFI  
MCM2 SSRP1  
SLC25A17 PEX19  
RPS27AXPC  
SPP1 CSNK2A1  
TFG NFKB2  
DLG1 GRIK2  
CARD8 IKBKG  
YES1 PTK2

LDB2 ISL1  
XRCC4 APLF  
TGFB1 AMHR2  
TNFAIP3 CCDC50  
PIK3R1 CDC27  
COL1A1 MMP2  
MYC NUP133  
MCM4 MCM6  
ZAP70 NFAM1  
IGFBP5 FHL2  
YWHAB USP8  
ZIC2 RNF180  
ARID1A CARM1  
MAX MYC  
OTUD4 MOG  
PGR RNF4  
TCEB1 TCEB3B  
HSP90AA1 HSPA1B  
AR SMARCA4  
NOTCH1 LEF1  
ERBB2 ERBB3  
AR SMARCA2  
WNT1 SFRP2  
MAPK6 DST  
ELN LOX  
MYC GEMIN4  
EGFR CALM2  
SMAD6 RUNX2  
PDGFRB SH3KBP1  
MAPK3 PEA15  
SRSF1 PRPF4B  
SCAMP1 ITSN1  
CALM2 NRG1  
HOXA10 EP300  
RRAGARRAGD  
CHD3 KPNB1  
GNA14 OPRL1  
STIM1 ORAI1  
MYB SDC2  
SMAD1 ERBB2IP

HCK UNC119  
NFKBIE MAPK7  
SUMO1 MAL  
CDK1 PPP1CC  
SUMO1 MUL1  
MATR3 GSTK1  
SIN3A PA2G4  
ATG16L1 MAP1LC3B  
PDK2 HIC2  
HDAC3 HIF1AN  
CAD IKBKG  
MYC ACACA  
MAPK9 GRB2  
KCNH4 UTRN  
CHMP2A NOL4  
CROCC KLC3  
EEF2K EEF2  
TARBP2 EIF2C2  
KAT5 NDUFA4L2  
ADRB1 GIPC1  
CBX3 DNMT3B  
ARPC1B ARPC5  
CDK4 MYOD1  
ZEB2 CTBP1  
DHX9 LYAR  
LAPTM5 WWP1  
GSN VDAC1  
FNTA PTP4A2  
WASL DNMBP  
TPD52L1 MAL2  
SAP18 KIAA1279  
MATN2 MATN3  
GABARAP MAP1LC3B  
CRY2 TTC1  
FKBP8 BRE  
TLK2 FEZ2  
GH1 PSMC3  
MID1 UBE2E1  
STXBP3 VAMP2  
DDX23 TP63

CDC42 SRFBP1  
GATA1 IKZF1  
G3BP1 KRI1  
SOX30 NUDT3  
PCNA CCNA2  
BAG6 KLHL12  
DVL2 RBFOX1  
TEAD1 MAX  
ELF3 KRT31  
VDAC1 SF3A1  
SDCBP EFNBI  
PPP2CASET  
GABARAPL2 MLX  
ZYG1B1 WNK1  
NFKB1 G3BP2  
SLIT2 ETS1  
APBB1 KHDRBS1  
SERPINA3 KLK4  
TCERG1 CPSF6  
GNB3 GNG4  
SLC38A1 TLE1  
XRCC6 ATP6V1E1  
PNLIP YWHAE  
STK38 HERC5  
TRAF5 MAP3K5  
CDC34 CDK9  
PRKCA AKAP12  
SMAD2 TBC1D1  
HLA-B PDCD6IP  
AKTIP KIAA1377  
VAMP3 IKBKG  
MKRN3 UBE2U  
HIBADH YWHAB  
BTF3 VHL  
SMAD1 MED15  
ZEB2 MTA1  
NOS1 NOSIP  
CCNE1 CDK2  
UBE2I RAD18  
PDPK1 STRAP

HIST1H4I HDAC1  
SNAP23STXBP3  
RAC1 PLEKHG2  
ITPR3 SIGMAR1  
HLTF USP7  
KCNB1 STX1A  
PTPN6 STAT6  
CCND1 CDK6  
MSN L1CAM  
SQSTM1 GLG1  
CYP2C9 MAST1  
CHEK2 TSSK1B  
FN1 PRELP  
HRAS MAPK8  
FYN FCGR2C  
MAPK1 GMFB  
COPS8 COPS7A  
FYN FCGR2B  
NPHS1 MAP2K3  
CCR1 CCL23  
SLC25A5 RIPK3  
IGHM CEP72  
STIP1 FKBP4  
CRB1 INADL  
FYCO1 MAP1LC3A  
C10ORF118 PLEKHA5  
ZMIZ2 SALL2  
GATA3 MDM2  
TUBB4 TRADD  
EPHB2 SDC2  
LCP2 MAP4K1  
DLG4 KCNA1  
NFKB1 VPS4A  
YWHAE CHAF1A  
TNFSF14 BIRC2  
FGFR1 SHB  
MYO1DPELO  
PEX1 PEX26  
GSPT1 RANBP2  
NFKB1 TP53BP1

HIST1H1A EZH2  
EIF1B SAR1A  
PLCB3 CAMK2B  
PLCB3 CAMK2G  
STK11 MARK1  
APP SNCB  
MYF6 ID1  
ARHGAP1 EPB41L1  
NR4A2 CISD1  
APAF1 BCL2L1  
CAST CASP7  
CSNK2A1 HES6  
GPRIN1DLGAP4  
ZBTB37SH3BP4  
ATN1 TEP1  
ERBB3 TXK  
MAD2L1 ADAM15  
ERBB3 ABL2  
LHCGR GNAS  
FGA HRG  
SLC9A3R1 AKAP10  
ARF6 DCTN1  
RAC1 YY1AP1  
PSEN1 METTL2B  
GRIP2 GIT1  
AKT1 IRAK1  
AP2A1 EPS15  
ARF6 DYNC1H1  
SSRP1 SUPT16H  
PTHLH ARRB1  
TUBGCP4 OBFC1  
FANCA HSP90AA1  
HLA-C PSME3  
TUBA3C TAB1  
ISG15 FUT4  
USO1 PTP4A3  
SLC2A1STOM  
ADAMTS4 HP  
MLLT4 YWHAZ  
SUPT3H KAT2B

NCOR1 ZBTB7A  
SUPT3H KAT2A  
UBE2I SALL1  
IKBKE ISYNA1  
SLC2A4PSMD7  
SMAD3 SVEP1  
DNM2 PACSIN1  
PTPN6 PAG1  
TGFB1 OCLN  
MCM3 HLA-B  
DLST UIMC1  
ZBTB7A BCL6  
TGM2 HTT  
DOK2 RASA1  
FXR2 AP1M1  
PLCB3 TRPC3  
EGFR PTK2  
CDK2 CDK20  
EWSR1 SERP2  
CSPG4 GRIP2  
RBX1 CAND1  
CCT4 IGBP1  
FGFR1 RPS6KA1  
HSP90AA1 DAPK1  
SIP1 STXBP2  
TAF5L TAF9  
PIK3R2 IGF1R  
BRAF RANBP9  
GNB2L1 IKBKG  
RNF123 MAP1LC3B  
DSC1 PKP1  
SP2 NR0B2  
SMAD2 GATAD2B  
COL1A1 VWF  
KRT15 APC  
IKBKE ACOT13  
LRP2BPCOPS3  
NCAPH NCAPD2  
EWSR1 CD177  
HSPA4 HIF1A

PCBP4 PCBP1  
SPTBN2 DCTN1  
MPDZ AMOT  
HES1 FANCF  
PPP2R1A TRADD  
UBE2D1 STUB1  
CCT5 THEG  
CCT6A RPAP1  
COL2A1 FGF7  
ABL1 TRIM39  
DDA1 ANKFY1  
GRIA2 SQSTM1  
KIF1B EEF1A1  
DEGS1 PCMT1  
RPL3L G3BP2  
TNKS2 LNPEP  
TADA3 XRCC6  
GADD45B GADD45GIP1  
CHAF1A ASF1A  
RAD51C XRCC2  
RAD51C XRCC3  
NANOS3 MPRIP  
DYNLL1 TRAF3IP3  
PTGS2 COPS5  
WBP4 SNRPA  
CHEK1 BLM  
LRP1 KAT5  
SNAP25DNM1  
HAX1 ABCB1  
GABARAP ATG5  
CDC42 FNBP1L  
ALB PRB3  
DYNLL1 POLQ  
MEGF10 KIAA1598  
TUBA4A C5ORF25  
PRNP CWC15  
FIBP GEMIN4  
PLEKHA5 PICK1  
MBP BMP2K  
JAK2 IL6ST



MAPK8 REL  
HGS MED7  
UBE2B IRF7  
UBE2D3 IKBKG  
ARPC1B ACTR2  
ARPC3 ACTR3  
NDUFB9 HAP1  
TNFRSF1B EEF1A2  
RPS6KA3 SHANK1  
PINX1 DDX50  
NFKB1 TBK1  
ARPC1B ACTR3  
IGFBP5 KPNB1  
TGFB1 ARHGAP31  
SULT2B1 SULT1E1  
PLEKHA5 SPTBN5  
APAF1 HSP90AA1  
TUBA3C NFKBIB  
YWHAG SF3B3  
RNPS1 PRPF8  
PSEN1 KANK2  
PLEC KCTD13  
SNTB2 KCNJ12  
NR2F1 COPS2  
HIVEP2 RPS6KA1  
SNUPN RAN  
TRADD HSPA1B  
EGFR HDAC6  
RGS16 GNAI1  
PRKDC CAMKK2  
ABL1 NPVF  
YWHAQ HDAC5  
CDC42 ARHGAP31  
SYNGAP1 CAMK2A  
RNF4 TCF20  
SRF TEAD1  
TSC2 GSK3B  
IPO5 NUP62  
IGFBP3 CAV1  
PAICS MOBKL3

DSPP PKP2  
SYT7 STX2  
IRF7 MYD88  
ABCD3 USP32  
RAD23B ADRM1  
YWHAQ CAMK2A  
HNF1B HIST1H3J  
ZBTB6 ATF7IP  
TTR CHD3  
SNTB2 SCN5A  
ACTA1 PARVA  
UBE2G2 MALT1  
DVL2 PARD6A  
CCL5 DPP4  
BRCA1 SMARCC2  
SUMO2 CNTN2  
JAM2 TJP1  
TECPR1 GSG1  
BRCA1 GF11B  
DDB1 DCAF16  
DDB1 COPS8  
CASP1 ATN1  
MYBPC3 TRIM63  
ZNF250 TRIM23  
RPS20 IKBKG  
MLH1 C3ORF75  
SNAPC5 NMI  
TUBA3C TRADD  
ACTL6A SMARCE1  
RPS6KA1 SHROOM3  
SRF ELK4  
PPFIA2 PPFIBP2  
ELL USPL1  
CASP1 ATXN3  
PTH BAG6  
TBP SETD7  
STAT2 SMARCC2  
TRPC3 PLCB1  
ACTN1 COIL  
WT1 FHL2

IRS1 PRKCQ  
MAPK8IP2 DUSP16  
DDIT3 PICALM  
HDAC1 RCOR1  
AR GNB2L1  
SNRPD1 CDC5L  
NCOR1 NR1D1  
APTX TSPYL2  
BRE SSR3  
PEBP1 MED10  
SRC SHROOM2  
MAP1A KCNMA1  
TCAP ANKRD2  
DDA1 LARS  
PCMT1 CHD3  
PHF17 MEAF6  
TRIM29SNAPC1  
CDK1 DAB2  
ZFYVE20 VPS45  
VHL TCEB2  
INSC GPSM1  
HIRA H3F3B  
GOLGA2 TMED2  
FBN1 RHOB  
BUB1 CRK  
MCM3 HAUS1  
NKX2-3 ZNF182  
AXL RANBP9  
HIP1R DYNLL1  
GRB2 ISG20L2  
APOA1 SCARB1  
JAK1 PRKCZ  
JOSD2 AHCYL2  
TMEM33 C20ORF24  
PHC1 CBX8  
VWF FURIN  
EIF2S2 PRKDC  
PRKCA GJA1  
CALCOCO2 C20ORF195  
SUMO2 HDAC2

COPS6 BTBD2  
SMARCA2 RBBP7  
RAI14 FEZ2  
MYST2 ATN1  
HDAC1 APPL1  
SERPINE1 KLK2  
YWHAG KRT31  
CIITA HDAC5  
PDCD10 FGFR1OP2  
HLA-E PPP1R16A  
ARF6 SEC11A  
SMARCA2 ARID1B  
HSPA1B STUB1  
SRSF7 CDK19  
FYN CD48  
UBE2H UBASH3B  
TRIP6 RNMTL1  
PCNA HLA-C  
MNAT1 INSL6  
VHL TCEB1  
CBX3 MIS12  
KAT5 IK  
CCDC130 EEF1A1  
CUL3 KCTD5  
CCT3 YWHAZ  
HSPA1B PACSIN2  
OR10J1 TRAF6  
CD19 SOS1  
ACTB ATF7IP  
VHL PCBP1  
ZNF707 MDFI  
HAP1 COL9A2  
TNFRSF1B FANCI  
MTUS2 ZFP64  
CALM2 TAB2  
AIFM1 WWC1  
FOS NCL  
LGALS3BP NFKB2  
SQSTM1 KEAP1  
EIF3F EIF4E2

CDC45 CDK4  
LCK CD79B  
ABCA1 SDHB  
SLC2A4FAR1  
BCL2 TP53AIP1  
SPRY2 CBL  
TNFRSF1B ATAD3A  
SIN3A BAZ1B  
HRAS FHOD1  
SMAD7 RPF1  
SMAD2 DOCK8  
EXOSC2 KHSRP  
CTNNB1 PKP2  
KRT15 PRPH  
PRKCB RPS27A  
LYN KHDRBS1  
ITGB4 PRKCA  
ATF2 SSFA2  
RHOB ARHGDIG  
TRIP6 LPAR2  
WDFY3 ATG5  
SRSF7 SRRM1  
TGFB1 DUSP13  
E2F4 RYBP  
RPS3 IKBKG  
SMAD7 YAP1  
TGOLN2 FURIN  
FNBP1 AKAP9  
MAPK9 PRKD1  
TALDO1 CHD3  
PGR APEX2  
ACTB TJP1  
ZNF165 SCAND1  
ZZZ3 PBXIP1  
GRB2 RALGPS1  
MAPK9 SRFBP1  
HOXD4 XRCC6  
MECP2 LBR  
UBE2H RNF2  
DAB2 PIN1

TSC22D1 FASTKD2  
CNTNAP2 EPB41L3  
TGFBR1 DAPK2  
SKP1 FBXO34  
NR4A1 MAPK8  
ELN LOXL1  
FRAT2 GSK3B  
XRCC6 CDCA5  
POU2F1STIP1  
UBE2D1 TRIM26  
HLA-C HLA-B  
RAP1A FADD  
DYNLL1 PKIG  
PABPC1 GSPT1  
HR RARA  
ILK HEATR2  
RIPK2 CD40  
EXOSC2 UPF1  
PSMB1 FTSJ1  
PIAS1 SUMO1  
UTP3 HAP1  
EFEMP2 UBQLN4  
PIWIL1 DICER1  
TRIM23POLI  
SMARCC1 BCL7C  
LMO4 TSEN15  
YWHAE MLH3  
GRB2 PITRM1  
BCL2 BCL2L10  
RAD51L3 BLM  
NFKB1 HSPA9  
GKAP1 SH3BP4  
DVL2 ATN1  
HNF1A SMPDL3A  
PRKCB RASGRP3  
RAC1 ARHGAP31  
DCC CASP9  
NPM1 PLCG2  
SUMO2 SLX4  
BRCA1 WDR48

PDCD7 FEZ1  
PLCG1 PDIA2  
CDCP1 ST14  
TPST1 CCR2  
RNF4 TRPS1  
KCNA1 DLG1  
GADD45B CDK1  
RAN SSRP1  
ZNF410 BLZF1  
TOPBP1 RPAP2  
PLCG1 LCP2  
CLDN4 EPHA2  
FZD9 MDFI  
IMPDH2 AKT1  
TERF1 DLG5  
PPP1R3D YWHAG  
USO1 ARF6  
RALA RAP2B  
TNK2 WWOX  
GABARAPL2 RAPIA  
HAND1 MYOD1  
HSPA1B NQO1  
CASK DLG4  
ST13 DAPK1  
RELB KIAA1967  
RAB27B SYTL2  
BMI1 IMMT  
COPS6 QTRT1  
VIP UBQLN4  
SCN4A SNTB1  
DSG1 PKP2  
PAX8 EP300  
PGR DAND5  
MYH1 SMYD2  
NIPBL MAU2  
PSMD11 SMAD4  
RGS12 ITGB7  
MCC MMS19  
PPARG KAT5  
INPPL1 FLNC

KCNJ10IL16  
PRKCB ADRBK1  
VAV2 USP38  
DDB1 COPS7A  
CRK PTK2  
PIN1 NONO  
DDX58 UBC  
FANCA CAPN1  
UBE2C UBASH3B  
MET STAT3  
YWHAB ADAM22  
COPS6 BTBD1  
AKT1 SMARCB1  
YWHAB RAI14  
PRKDC DCLRE1C  
RGS12 GNAI1  
PLCD1 KPNB1  
MAP3K1 RUVBL2  
MYC CDC6  
FUS PRMT1  
SEMA7A NCK1  
SNPH STX1A  
ATXN2 ZNRD1  
SURF4 TMBIM4  
GPN1 ARMCX3  
ARPC2 SF3B1  
KRT9 TANK  
INSR FABP4  
DYNC1H1 PHB2  
PCP2 LAMA3  
TBC1D4 RBM12  
COX4NB TSC22D1  
EFEMP2 PLSCR4  
SRC ERBB3  
SDC2 ITPR1  
FOXO3 ATM  
WRN NLRP2  
VCP FBXO2  
UNC119 QTRT1  
RPS6KA3 SLC45A2



RBBP6 NDUFB9  
PCNA UNG  
CTNNA2 CTNNBIP1  
NCOR1 BAZ1B  
DIAPH1RHOA  
RPS27ARUNX3  
YWHAB SH3BP4  
PEX14 MED8  
GK GCKR  
H3F3B EHMT1  
CSTF2 KIAA1377  
AURKABIRC5  
CUL4A NEDD8  
TINAGL1 MED31  
PRKCA CASR  
ZMIZ2 PIAS3  
SRA1 NCOA3  
YWHAB PRKCD  
CAMK2B CAMK2A  
PLG F2RL1  
YWHAG FRMD6  
SKP2 CUL1  
MAPK9 SHANK1  
IL16 DMRTB1  
SKP2 CUL4A  
EIF5B NR3C1  
TGM2 CASP3  
CSTF2 CPSF2  
RPS6KB1 MAPK8  
HDAC1 DNMT3L  
RPS6KB1 MAPK9  
AR SUMO1  
ADRB2 GPRASP1  
CCNB2 CDKN1A  
NCSTN PSENEN  
SMAD7 SRF  
WDR83 EGLN3  
COPS6 CLPB  
FLOT1 FLOT2  
TACR1 TAC4

DDX1 NDRG1  
PSMD8 PSMD6  
ZNF225 ERBB3  
KAT2B CDCA4  
XIAP TBK1  
EI24 UBE2D1  
C1QBP EXOSC6  
FXVD1 PRKACA  
PRKCA OPRD1  
PRPF3 WBP4  
SF1 RBPMS  
NCOA4 KAT2B  
MAP2K4 FLNC  
MLL HCFC2  
AIMP1 IKBKE  
GMNN SIX3  
UBA1 DZIP3  
CSF1 CBL  
RBPJ SIN3A  
CDK5 FSD1  
HDAC1 LEF1  
PBX3 RABAC1  
RBPJ SPEN  
IKBKAP CSTF2  
CDK5 CABLES2  
HOXB6 KRT15  
GRB2 POLR1B  
MYBPC1 USP25  
WBP4 EWSR1  
CPSF4 MARK3  
MTA1 FOXP1  
ATXN7 TAF12  
UBXN7 HIF1A  
HDAC1 ING1  
FAM46A EGLN2  
UBE2K RNF138  
DIO2 USP33  
TAF9 FEZ1  
GRAP2 HNRNPK  
CDH1 SRC

UBC NBR1  
CUL4A GSTK1  
RHOA ARHGAP10  
RPS6KA3 FAM65B  
HSPD1 TLR1  
TAF1 BRMS1  
POU2F1AES  
GABRB1 PIK3CA  
SURF4 NEK6  
FOS IDS  
PRKAR1A GABARAPL2  
RASA1 CAV1  
HMGA1ORC1  
HMGA1ORC2  
TRAPPC2L GSG1  
APC MAPRE2  
TEC PIP4K2A  
RGS5 GNAQ  
JAK2 MPL  
SLC9A1MAPK14  
PSME3 FTSJ1  
NFKB1 CTNNB1  
TNFSF11 MMP1  
SNRPD1 SRRM2  
DNPEP UNC13A  
MYC KAT2B  
ATP5B YWHAZ  
NFIX RPS6KA1  
MAVS TICAM1  
MAFG NFE2L2  
SLC9A3SHANK2  
EPRS HSP90AA1  
ATN1 MYST4  
YWHAG DOCK7  
ALDOAPCNA  
SEC61BARL6  
NCK2 DOCK1  
SP100 HIPK2  
CBL PXN  
PSMD11 UNC119

SRC SPTAN1  
MIER1 CREBBP  
VCP SYVN1  
ZNF8 SMAD4  
CA2 PTCHD2  
PRICKLE3 TRIM29  
BAG2 SRRM2  
PDIA3 PLXNA1  
EDC4 DCP1A  
PSMB6 IKBKE  
UBE2D1 UBE3A  
MED28 MED17  
WWP2 EWSR1  
MYC KAT2A  
WWP1 RNF11  
EPB41 EPB42  
KRAS PGGT1B  
ABLIM1 USHBP1  
YWHAZ ADSSL1  
SERPINE1 IGFBP5  
KEAP1 NFE2L2  
TGFBFR1 ANAPC5  
SMC2 WNK1  
HSPA9 MVD  
YWHAG RNPS1  
EHMT2 THAP7  
SF3B1 YWHAZ  
MCC MSH6  
HLA-B FSCN1  
ZNF691 HAP1  
JAK2 IGF1R  
ST5 SMAD2  
TPD52L2 TPD52  
CXXC5 SMAD5  
YWHAG RABEP1  
KEAP1 ZRANB1  
HCK ABL2  
RAB25 KPTN  
NOS1AP SYN1  
TIRAP TICAM1

EIF3E EIF3A  
CUL3 GABARAPL1  
ATG10 MAP1LC3B  
ATXN1 R3HDM1  
TAF5L MYC  
IDO1 PPP1R16A  
GPRIN2DYNLL2  
ATXN1 DAZAP2  
MED24 TRRAP  
CCDC88A DISC1  
MYC TUBA3C  
SERPINA1 MMP11  
PPFIA3 PTPRS  
KCNK3 YWHAZ  
HMGB1 CRMP1  
TNFRSF10C ZHX1  
RPGR RPGRIP1  
IGSF1 HECTD1  
STAT1 EP300  
MRPS26 USP42  
SDCBP GRIA1  
SDCBP GRIA3  
SDCBP GRIA2  
ADAM15 MAD2L2  
HLA-B CPSF6  
EWSR1 C18ORF10  
ZMYND19 HACL1  
IQGAP2NFKBIB  
PAPOLA CREBBP  
MAPK1IP1L LENG8  
GRIK1 HOMER1  
PPP2R1B SGOL2  
CCDC136 ZNF408  
ACP1 MRPL20  
GRB2 WDR44  
TP53 YWHAZ  
CRP HIST1H2AL  
MYC CREBBP  
TUBA4A SRRM2  
ACTA1 JUB

CCNC CREBBP  
PRKCG NRG1  
UBE2U TRIM35  
EIF2AK2 CASP3  
MSH6 CLSPN  
ENO2 C16ORF45  
RPS27A CDC6  
PTN TP53BP2  
SHC1 ERBB4  
ANXA5 COL10A1  
MED12 MED30  
RPS27A RIPK1  
CBFB DHX36  
RPS27A HDAC1  
SIN3A ING1  
BTBD2 CCDC90B  
PTPN11 PTK2B  
TUBB MAP1A  
EIF3B EIF3M  
KHK AP2S1  
MATK EWSR1  
ZNF91 CHMP5  
MAP3K7 HIST1H4I  
MYH9 GRB2  
PFDN1 IMMT  
MED24 MED29  
MYC ITGA1  
GTF3A EPN1  
SNCA ARHGAP15  
CCNB1 PSMD4  
MLLT3 AFF4  
ARIH2 EEF1A1  
ACTA1 CTTN  
PBX1 PBX2  
UQCRRGRINL1A  
SKP2 ORC1  
GABARAP ATG10  
NAPA RTN4  
C20ORF27 PHKB  
CASK DFNB31

MYC MARS  
RPS27ALAPTM5  
GADD45B CCNB1  
MED14 PARP1  
MDFI SLC25A10  
RPS27AMAP3K3  
SERPINA5 KLK1  
PPP2R1A SMAD2  
CDK1 LYN  
CD247 GAB2  
GRIN2B AP1M1  
PCGF2 USP11  
PCNA XRCC5  
ITGA5 ITGB5  
SMAD4 ATF7IP  
PARP1 CHD7  
NCOR1 DDX20  
TIFA SDCBP2  
ACP1 VHL  
TAF9 UBE2Q2  
DEK HIST2H2BE  
VAV2 SERBP1  
GPS2 SETDB1  
NCK1 MAP4K5  
LCP2 STAM  
IMMT SRRT  
RUNX1T1 NEUROG1  
CDK5 CDK16  
HDAC1 CTBP1  
DRAP1 TAF9  
COL2A1 BGN  
CLTC PRKAB1  
RBM10 SREK1  
GABARAPL1 TBC1D2B  
FTH1 UBC  
RAB25 RAB11FIP2  
GSK3B IKBKG  
DCTN1 DAXX  
MAP3K1 UBE2D4  
UQCRQGRINL1A

RAD21 PDS5A  
CD247 SH2B3  
SAP30 ZNF395  
XIAP SERTAD1  
OBSCN TTN  
UBE2R2 BTRC  
UGCG RTN1  
FOXO3 NR1H3  
PLCG1 CHAF1A  
TRAF2 PSMF1  
SLC25A6 KRTAP4-12  
POLR3A RPAP3  
EFEMP2 LINGO1  
MAPK3 SMAD2  
GP1BA YWHAH  
PIK3R1 TIE1  
PIN1 RNPS1  
GRB10 DOK1  
HPRT1 ATG5  
PDCD4 FBXW11  
PHF2 PRKCB  
SNRPE GEMIN6  
DYNC1H1 CDC5L  
YWHAG DOCK7  
FBXW4 NLK  
CCT8 MOBKL3  
YWHAH ING1  
INSR PTPN11  
FKBP4 UBA5  
NEFM TNIK  
KAT2B SERTAD1  
MAPK1 SHC1  
HNRNPU MAP3K14  
NCOR1 DACH1  
YARS FTSJ1  
PRLR NEK3  
CDC16 MDC1  
GATA3 HDAC5  
TNP1 PRKCA  
TGFB1I1 TGFB2



GPRASP1 MTF2  
ZNF646 NINL  
PRPF6 NR3C1  
HNF1A PCBD1  
RB1 CDK2  
NAA38 DBF4  
NKRF NFKB2  
SMARCA2 HIF1A  
HOXB9 MYBBP1A  
CUL4A VPRBP  
CTSL1 ARSA  
KIT CLTC  
SHH HHIP  
YWHAH RIMS1  
NR2F1 ISL1  
CSNK2A2 ACACA  
NCK1 SF3B4  
RARA EZH2  
PTPN6 GAB2  
ZNF8 SMAD3  
CAPZA1 ACTB  
NF2 DDB1  
S100A8 PPIA  
VHL SF3A1  
PLG RAP2A  
YWHAB KIF5B  
RARG RXRB  
YWHAZ MVP  
HSPA1B DYX1C1  
EXOSC7 EXOSC4  
DPP4 CXCL12  
GFI1B NELL1  
ABL2 MAP3K10  
CBX7 HIST1H3J  
EIF3F USP3  
FBLN1 NOV  
RPL35 MAP3K1  
BRAP KSR1  
ALB FCGRT  
GATA2 SMAD4

ANAPC1 ANAPC4  
ANAPC1 ANAPC2  
CKS2 EEF1A1  
TNFRSF10C SLC27A6  
CPSF1 WWOX  
ANAPC1 ANAPC5  
ANAPC1 CDC23  
PAICS TRAF6  
HCFC1 MYST1  
HIST1H2AE KAT2B  
SKP2 SMAD4  
CCNA2 RBL1  
ATRX H3F3B  
SPOP H2AFJ  
GTF2I PRKG1  
FRYL YWHAG  
LIG1 CSNK2A1  
C3 VSIG4  
ATAT1 SMARCC2  
CHD3 PIAS4  
EFEMP2 ATN1  
CR2 HNRNPU  
EFEMP2 ATXN1  
MTDH OTUD6B  
PSMD3 NFKB2  
VAV1 TYK2  
CX3CR1 CX3CL1  
AKT1 PPM1A  
IL3 PIK3CA  
NCOA6 RBBP5  
PLN PPP1R3A  
TNFRSF1B BMX  
BCL10 IRAK1  
POLE POLE4  
HAP1 DCTN1  
CSNK2A2 PAK1  
NCF2 ACTB  
FOS MAP1B  
ROR2 IKBKG  
SQSTM1 TOE1

RPF1 SCNN1G  
PITPNAMLKL  
MAGOHB RBM8A  
PTEN MAST1  
SRP14 PINX1  
YWHAB LRFN1  
TCERG1 CYFIP1  
ZW10 ZWILCH  
CENPF CHMP2B  
RPF1 SCNN1B  
CSNK2A2 EIF2B5  
ALOX12 TRIB1  
MAP2K2 COPS5  
PRPF38B USP33  
RANGAP1 RANBP2  
G3BP1 RPAP2  
STRN3 ZRANB1  
EMILIN2 EMILIN1  
DVL1 ATN1  
EEF1D CCAR1  
EHMT2 UHRF1  
WNT7AFZD5  
DDB1 DDIT4  
ABL1 MAVS  
ADIPOR2 APPL1  
SFN GRB7  
ATP1A1 TPT1  
CREB1 C14ORF1  
ECSIT RNF32  
VARS EEF1A1  
LUC7L NFKBIL1  
KIAA0182 C7ORF64  
TRIP6 NUP210  
KIAA0182 EXOSC6  
SLC3A2FAM57A  
YES1 TP53BP2  
RTCD1 RNMTL1  
APOA4 GPLD1  
SUMO2 RCOR2  
MED25 MED28

FASLG SRGAP1  
PDGFRB GRB14  
ATG16L1 IKBKG  
BAI1 BAIAP2  
UIMC1 SSU72  
HIPK3 MTMR4  
CDK5 PURA  
IFIT3 A2M  
GSK3B SNCAIP  
PRKCI MARK2  
IKBKE SAR1A  
TH MAPK1  
CALCOCO2 FASTK  
CHRNA3 UBQLN1  
FOS KIAA1267  
PACSIN1 STMN4  
ARPC2 SNRNP200  
YWHAB GAPVD1  
SOS1 ABI1  
SRC TGM2  
ADAMTS4 ACAN  
FYN IL7R  
UBE2N XIAP  
MAPK3 MYLK  
HBP1 TCF4  
RGS16 EGFR  
CLTC RIPK3  
WAS PACSIN3  
PTPRF PPFIA1  
NPPA HNF4A  
MAP2K2 NAA10  
SMAD4 STUB1  
SRI SMAD2  
YWHAG JAKMIP1  
MKX SIN3A  
HDAC3 TCF19  
PLCG1 PAK1  
EPB41 NHP2L1  
CNOT3 CNOT6  
REL C1QBP

PDGFRB GRB7  
MCC TP53RK  
PCNT CALM2  
TBP GTF3C2  
PIK3R1 IRS1  
EIF1AX EIF5  
FAM123B BTRC  
MBD4 HDAC1  
TAF9 RNF138  
PRKACA PHKA1  
SMAD2 RIMS1  
MYH10 DAXX  
SHKBP1 SH3KBP1  
SP100 CBX3  
TPM2 MAP4K5  
H2AFX SUPT16H  
FYN PLCG2  
MT-ND4 MAX  
GMNN REPIN1  
GNA14 CCR1  
ANGPTL1 NR2F6  
UBE2D1 RNF150  
UBE2H DTX3L  
GORASP2 KCTD5  
NPM1 CDC14A  
CD247 STAT5B  
OGT NFATC1  
HSP90B1 MTPP  
PML SENP2  
RAB8A BIRC6  
AR UBE2I  
MAP4K4 SCAF1  
STX1B VAMP8  
PRKACA AANAT  
S100P S100A4  
GPRIN1 TJP1  
CDC5L HOOK1  
ITK G3BP1  
HDAC1 MBD1  
MEIS2 ZNHIT3

DAND5 ARNT  
GNAI3 RGS7  
MAP1A UPF2  
CCT8 STRN3  
GRAP2 FASLG  
PBK KIAA1377  
RANBP2 CDCA8  
CREB1 ZHX1  
CDK1 ITPR1  
TSEN15NBPF3  
ITGA2 ACTA1  
KAT2B KLF15  
HCK PAK2  
RHOG VAV3  
YWHAQ PANK2  
SMAD3 ANK3  
PRKACA RRAD  
MAPK6 C4ORF41  
HBP1 ZG16  
ARHGEF9 GPHN  
SORBS3 ZBED1  
RRAD CAMK2G  
P4HB TNFRSF14  
USP2 RPS27A  
CLNS1A WDR77  
MYC HDAC2  
CBFA2T2 WDYHV1  
RAMP3 PDCD6IP  
MED24 MED9  
APOH LRP2  
XK CSNK2A1  
DST MAPK6  
HDAC3 MAPK11  
SMARCA4 ACTB  
NOL8 RRAGD  
RAD23A LOXL4  
HDAC4 CTBP1  
FADD CASP10  
DUT PPARA  
UNC119 BTBD2

VAV2 RAC1  
TRIP6 AFAP1L1  
CD79B SYK  
ATG2A WIPI1  
CD79B ZAP70  
TCERG1 WBP4  
CLN3 GANAB  
PSMD14 ADRM1  
MEGF10 ITSN2  
SUMO2 MEF2A  
ITGB1 FLNB  
CDC27 TTK  
SRSF5 SMAD2  
PARN CSTF2  
IER3 PPP2R5B  
HIST1H1A SUZ12  
ABCC12 VCPIP1  
YWHAB PRKCZ  
COPS2 COPS8  
HGS MAP3K7  
GABARAP GABARAPL1  
HSPG2 ATN1  
APC MAPRE1  
SGK1 NASP  
MKRN3 UBE2D4  
HIP1 HIP1R  
COPB1 UBQLN4  
OPA1 NR4A2  
PIK3R1 ID4  
HOXB8 PBX1  
HOXB8 PBX2  
HOXB8 PBX3  
NCK1 EPHB1  
SNRNP200 YWHAG  
TGFB1 RHOG  
KNG1 PREP  
PRKDC NR1H4  
TGFB1 FMOD  
PRKACA GAD1  
ABL1 CSMD2

BIN1 BIN2  
SRC RAPGEF1  
CRX DAND5  
TCERG1 SF3B1  
SUPT5H PRMT5  
TP53 LAMA4  
P4HA2 P4HB  
PELI3 TRAF6  
INS CTSB  
NGFRAP1 VTA1  
BCL2L1ANTXR1  
IFIT3 RAD23A  
HLA-C GANAB  
ARID1A PBRM1  
CTNNB1 LEO1  
TRIM32MID2  
RPS27ACUL1  
RNF19A SUFU  
VPS35 PRKAB1  
SOCS7 NCK1  
CRHR1 UCN  
RPS27ACUL4A  
SURF4 BRF2  
PSTPIP1 RPL31  
HIST1H3J THAP7  
DAXX HIPK2  
CENPA KIF23  
ZFH3 NINL  
FBP1 RNF183  
VHL MTPN  
SRSF1 SRSF5  
EIF2AK2 STAT1  
TEAD4 WWTR1  
DAXX HIPK1  
SIN3A IKZF2  
CENPJ CIC  
SUMO1 TOE1  
CHEK2 RB1  
DDB1 DTL  
NUDT18 KCTD13



FXR2 MCRS1  
ABL1 CDON  
CAP2 CAP1  
MYC RFC4  
FXYD1 PPAP2A  
MLLT3 C7ORF64  
DDX5 OTUB1  
PLRG1 CTNNB1  
SIN3A IKZF3  
GOSR1 GABARAPL2  
PIK3C2A EGFR  
MYC GATAD2B  
PDGFRA STAT3  
ROR2 MAGED1  
MMP1 BSG  
PRKCG DCTN1  
PRKCA NUMB  
ATG7 MAP1LC3C  
SYNCRIP SYT4  
PIK3R2 SOCS7  
IGF1 IGSF1  
MYC RFC1  
GNB2 RIPK3  
DYNLT1 HSPB9  
IGF1R YWHAB  
REPS1 PLEKHA5  
PITPNAPIK3C3  
HCK WAS  
MNAT1 HPS6  
LYN CDK2  
FURIN FLNC  
MYB UBE2I  
SIN3A HDAC9  
IKBKE FAM49B  
AMPH DNMI  
DVL1 FRAT1  
UBE2K RING1  
MYC GTF2F1  
SNAP25STX3  
TRIM24TRIM33

PARP1 CASP1  
ATP1A1 FXYD2  
STK11 MARK2  
PAK7 TUBGCP4  
YWHAZ RAP1GAP2  
CYP11A1 CYP11B2  
CTBP2 BAZ2B  
HOMER1 HOMER3  
MYBBP1A NR2E3  
MAP1A DLG1  
POLD1 GSTK1  
DLEU1 CCDC90B  
AP1G2 RAB5A  
MED12 EHMT2  
MAPT STXBP1  
TRIP13 PLSCR3  
ECHS1 SMURF2  
USP8 CHMP7  
WDR5 WDR53  
F11 SERPINF2  
RGS14 GNAI2  
MYC EP300  
CASP7 BIRC7  
ARID4A HDAC2  
GFAP PSEN1  
MUC1 SOS1  
CREB1 RAB1A  
LBR SRPK1  
SNTA1 CNKSR2  
SMARCA5 USF1  
TCP1 RELA  
AIFM1 C20ORF24  
DCC SIAH1  
IL18R1 IL1F7  
HSP90AA1 MAP3K8  
TCF3 MAPK1  
PAK2 GIT1  
GSK3B MCL1  
FLT1 STAT3  
HGS RHOBTB3

CETN3 INSL6  
TP73 UBC  
ARNT UBE2I  
A2M ANXA6  
PTPRZ1PXN  
TOP2A TOP2B  
YWHAE RIN1  
OMA1 MYO6  
LDB1 LMX1A  
EID3 APPBP2  
LCK CD55  
PAK2 MYLK  
ERCC6 BAZ1B  
PRDX2 CDC37  
KRT10 SMAD3  
MYC CUL1  
EPHA3 EFNA5  
SPIB CREBBP  
PTPN6 LAIR1  
NEBL SMURF2  
PIR NFIX  
PIK3C2A PGK1  
ITM2A APP  
PPP3R1 PPP3CA  
STK11 MOBKL3  
CREB1 SREBF2  
EFEMP2 LRDD  
NCOR1 HDAC9  
NTS PREP  
RNF32 FBXL12  
YWHAE DYRK1A  
DDX17 EXOSC3  
RPS19 PINX1  
DDX17 EXOSC5  
USP7 MAGEC2  
YWHAZ INPP5A  
HSPA1B BAG1  
RAB11A VPS24  
RGS12 CACNA1B  
CAV1 SOS1

IGFBP3 CSNK2A1  
ARHGEF6 GIT1  
HLA-A B2M  
TAF1 APC  
CDC5L MYT1L  
NDUFB1 EWSR1  
GOSR1 BET1L  
LAMC2 SLA2  
UBE2D3 HDAC6  
TFCP2 NOM1  
BMP7 NCOA3  
MED30 MED20  
APP MAPK6  
PDGFRB COPA  
TMPRSS3 EEF1A1  
DCTN1 AKTIP  
HNRNPU NDN  
GPS1 MALT1  
NAIP XAF1  
ITGA6 GRB2  
PTPN1 PIN1  
MAGEA11 PNKP  
AURKBRCC2  
PDGFRB COPB1  
RANBP10 THSD7B  
MCC VPS35  
NR3C2 FKBP4  
HIST1H4I MAP3K1  
RGS3 HES4  
SGTA EFEMP2  
GRB2 ZNF141  
INADL CNKSR2  
COL2A1 HTRA1  
PCNA CDC25C  
BRAF PRKCA  
WAS ARHGEF7  
MSN SYK  
PIN1 MTRF1  
NPHS1 CTNND1  
SNX3 NCK1

CAPZB BCCIP  
SMAD2 CCDC25  
RAB8A RAB3IP  
RAF1 RHEB  
UBC BMI1  
UBC PCGF2  
M6PR GGA3  
ALDH2 IGSF21  
REV3L HDAC4  
DDB1 CNOT2  
MMP2 COL6A3  
FOXO3 SMAD4  
CPNE3 USP42  
MMP14 GORASP2  
FOS CARM1  
PIK3R2 SOCS6  
CDKN1B YWHAG  
RANBP10 CNTNAP4  
SMAD7 MAP2K3  
CHD3 MTA3  
TLX2 ZNF502  
SMARCA2 MECP2  
TRIP13 PLSCR4  
IL6ST PLAUR  
ARNTL NPAS4  
RUNX1T1 HDAC2  
HDAC3 PML  
ACTN2 ACTN3  
COPE CASP4  
SRC DGKZ  
SRC SNW1  
INS LRP2  
PIK3R1 IL13  
AIRE RANBP9  
PIK3R1 CTNNB1  
POU3F3SOX8  
YWHAQ CDK16  
SMARCD1 NR1H4  
TXNDC9 SETDB1  
PTPRB WAS

FYB FASLG  
CCNT1 PURA  
CRHR1 CALM2  
TNPO1 NXF1  
NCK1 MYLK  
CFLAR TUFM  
PRKCA RGS19  
TGFB1I1 HIPK3  
QKI PRMT1  
MGRN1 UBE2W  
STIP1 NEDD4L  
CEACAM1 CD209  
POLR1C POLR3D  
MED26 MED19  
COL4A1 KLK6  
RBPMS POM121  
XRN1 HEATR1  
POU2F1 LIFR  
NT5E LAMA1  
HLA-B NUP43  
ACTN4 GSN  
P2RX1 P2RX2  
SOAT1 WNK1  
XPC ZNF512B  
NKX2-1 CRK  
NUCB2 NDN  
YWHAB LBR  
MYOD1 MDFI  
GNGT2 GNB2  
HTR1D HTR1B  
MYC MXD1  
ARPC3 EFTUD2  
ADRA1B STAT1  
YWHAB CGN  
CREB1 DACH1  
RNF123 GABARAPL1  
PRSS23 ODF2L  
ABCA1 DLG3  
ABCA1 CREBBP  
PKIA DYNLL1

RAN SMAD1  
RAN SMAD2  
CHAF1B ASF1A  
LPL PLK1  
VAV1 CDC42  
HSPG2 NID2  
CTNNB1 HDAC7  
MARK2PARD6A  
LDB1 TOLLIP  
ADRB1 GOPC  
ILK GEMIN4  
ZNF91 MEF2C  
FES HSH2D  
MBP NEK9  
MAPT SRC  
MCM2 ELL  
PXN BCAR1  
SLC38A1 KCNA4  
WAS EVL  
ETS2 CREBBP  
REL FOXP3  
GATA2 HDAC1  
HOXD4 ZSCAN18  
SDPR CAV1  
DZIP3 UBE2E2  
PRPF40A DHX9  
ATP6V1H PHLDA3  
ATRX EZH2  
ORC2 HAUS1  
MBP MAPK15  
ITGB1 GULP1  
TRIM37TRAF4  
MYH10 TNFRSF10D  
TBP MDM2  
RNF125 UBE2D4  
PTPN6 CLEC4A  
DRD3 GIPC1  
SUPT5H PRMT1  
CD2BP2 TXNL4A  
KIF5A KLC3

SNRPB PRPF8  
ARPC2 ZMAT5  
HRAS ZHX2  
SOS1 LAT2  
SYNCRIP HNRNPH1  
UBC PHB  
LRP2 GPRASP1  
CELF2 APOBEC1  
TERF1 ZBTB16  
PPARG CREBBP  
CAV1 LRP1  
TCP1 SH3BP4  
TGFA GORASP1  
MEN1 STUB1  
LRSAM1 PHF23  
RGS16 GNAI2  
SART3 C3ORF26  
HDAC3 NR0B2  
USP7 CBX8  
TUBB4 LAPTM4A  
SMAD3 MAGI2  
F2 AANAT  
YWHAE ZNF839  
CEP110 MAX  
KRT78 CDC42BPB  
PDCD6IP PLCB1  
EIF2S1 EIF2AK2  
TP53 TFAP2A  
GNL1 ZNF182  
GABRB3 ARFGEF2  
HSP90AB1 STARD13  
PLCG1 MST1R  
DAZAP2 NDUFA5  
HBP1 GKAP1  
FXR2 CYFIP2  
KIFAP3 RBFOX1  
NFKBIB HSPA1B  
ABL1 APP  
RHOB RHPN2  
JUB LATS2



LRP6 WNT1  
NAA38 IGHMBP2  
HNRNPC PHKB  
PIN1 STIL  
PAFAH1B2 TIMM50  
EPC2 ING3  
MUC1 GALNTL2  
GNB2 TRAF6  
GFI1B COPS5  
IKBKAP NIPSNAP3A  
PDGFB PDGFA  
FXR2 FMR1  
FN1 HGF  
HNRNPU GPRIN1  
SGK1 TUFM  
UQCRB TOLLIP  
MRPL4 DDX24  
CSNK1E OCLN  
QTRT1 NDUFA4L2  
NASP GABARAPL2  
RAF1 NR3C1  
PFN2 SIN3A  
PHLPP1 USP1  
DDX3Y RPAP1  
EEF1D SUPT6H  
GPR158 PITX2  
SF3A2 CCAR1  
IL2RB JAK3  
OGG1 PRKCA  
HIST1H1C F10  
DYNLL1 MYO5A  
KLK3 PTHLH  
SPN SIGLEC1  
PAX5 CREBBP  
EFNB1 TIAM1  
HDAC3 SAFB  
MPDU1 HERC2  
CLN3 CCDC47  
ARID1A SMAD2  
KCNH4 MAPK14

ARHGDIB CUL3  
TOP1 BTBD2  
PPP1R13B TP63  
PLAT ANXA2  
GHR STAT5B  
ANTXR2 SMAD2  
EXOSC7 EXOSC6  
ANAPC2 FZR1  
PRKCA RGS7  
SHBG C17ORF65  
TNFRSF17 TRAF3  
ABCA1 SNTB1  
PFKM ATP6V0A4  
HCK LCP2  
ARL1 GOLGA1  
LMNA SRRM1  
PPP1R15A POU3F3  
UBA1 HSPH1  
VPS36 SNF8  
MEPCE ARID3B  
RIPK2 VDAC1  
UBOX5 UBE2D4  
RAC1 ITPR2  
RPS27A RASGRF1  
RAB4A PRKCI  
BCL9 TCF4  
FUS PTBP2  
CDH1 PKP4  
TFAP4 FBXW11  
IPO4 NEK6  
FOS CEBPG  
NTRK1 PLCG1  
POU2F1 SOX2  
USP7 ARNT2  
SNTA1 GLS2  
HCFC1 SUDS3  
CCNB1 HERC5  
JAK2 ALK  
PTN PTPRS  
SURF4 SERINC3

POU3F2GTF2B  
MAP3K7 HSP90AA1  
CSTF2TUBQLN1  
RPF1 CASP6  
RPF1 CASP7  
F2RL2 SRC  
RPS16 CNBP  
HOXB9 KRTAP4-12  
PRLHR PICK1  
BSG ATXN10  
STRN3 CTTNBP2  
H2AFX EIF3L  
CHMP1B CHMP4B  
STAT1 CSE1L  
RHOA GMIP  
H2AFX RUVBL1  
HDAC1 PLAGL1  
ZNF1X1 UBE2D4  
CDKN1B CASP8  
PRMT5 JAK2  
RUNX1 HIPK2  
ADRB2 MAGI3  
SMAD2 NOTCH4  
YES1 KIT  
SMAD3 ZNF329  
PLK4 FAM46C  
SMAD3 BPTF  
PRKCD PTK2B  
CBX2 RNF2  
MSX2 TLE2  
YWHAH KCNH2  
PAN2 TWF2  
BCOR CPNE4  
MSX2 TLE1  
SF3A2 SUGP1  
RUNX3 TCF7L2  
AHR SMARCA4  
BLVRA MAP2K1  
BRCA1 NUFIP1  
ITGAV ADAM9

SMAD3 RSPH3  
GFAP PSEN2  
INSL6 BRMS1  
PTPN11 GRB7  
SUMO2 SENP3  
PGRMC1 EIF1B  
F2RL2 ABL1  
COL1A2 SPARC  
RAF1 RAP1A  
RAF1 UBE2D2  
TAGLN2 IKBKE  
MYC CTNNA1  
FN1 FST  
GNAO1 TSHR  
PRKCD PPARA  
ABCC9 STX1A  
HIST1H1B EHMT2  
APC2 CDC16  
NOTCH1 HIF1A  
RPL7 NFKBIB  
HIST1H3J EHMT2  
ECHS1 HLA-B  
CCNA1 MCM6  
MAPRE1 COPS5  
SNAP25STX5  
UBE2I ASF1B  
CSF1R RASA1  
TP53 SUMO1  
PDGFRB NCK1  
SRC PTPN11  
CCKBR GRB2  
TSC2 YWHAH  
SF3A2 CHERP  
GNGT2 GNB1  
HOXB9 HOPX  
PPM1D TP53  
SERTAD1 PRDM4  
SELE GLG1  
FAM46A RNF14  
MBP PRKCD

CSNK2A2 TCOF1  
EXOSC7 EXOSC5  
ACE COMT  
ITGA2BTLN1  
TADA3 CCDC101  
HNRNPA2B1 TOB1  
TGOLN2 ITGB1  
TP53 PPP2R2A  
MX1 TRPC3  
CEBPE ZMYM2  
VHL KRTCAP2  
GRB2 RAB6B  
ACTR3 WASF3  
BCL2 ATP2A2  
ARIH2 SCAMP2  
LSM1 TMEM214  
CYTH2 ATP6V0A2  
CBFA2T3 SIN3B  
BRMS1 HDAC5  
PNP MCC  
PIK3R2 CD28  
MYD88 IL1RAP  
BPGM AKT1  
YWHAZ WDR61  
CALCOCO2 PTBP1  
MAP3K1 DTX1  
SHC1 PTPN11  
HSP90AB1 SUMO2  
TP53 ADH5  
TOM1L1 RAB18  
ZEB1 SMAD3  
HIP1 TFAP2A  
SMAD3 FOXO1  
PDGFRB PTPN2  
TUBA4A RACGAP1  
GNAI3 RGS2  
POLD2 WRNIP1  
SOCS3 EPOR  
GNAI1 CD47  
SMAD3 SREBF2

MMP3 SPOCK3  
UBE2Z PLEKHF2  
SMC1A SRRM1  
NCK1 PALM2  
GRK5 AVPR1A  
VPS36 CHMP6  
MARK2KIF13B  
ELK4 ID1  
DAND5 MAPK3  
CTNNB1 PITX2  
MCC CDKN2A  
HDAC1 PADI4  
PCGF2 PHC1  
H2AFX MAPK8  
NCK1 NCKAP1  
GRIA2 SPTAN1  
PCNA HLA-B  
CMPK1 PRKAB1  
PIK3R2 KIT  
MAVS MFN1  
BDKRB2 PRKCD  
GGA2 BACE2  
RB1CC1 MAP1LC3C  
AP2B1 AP1M2  
STAM2 UBC  
DDB1 DCAF4  
CDC42 VRK2  
PKN1 ARHGAP26  
ZNF24 INSL6  
BRCA1 MED13  
LDB2 LHX9  
MAPK9 SF3B4  
GRB2 ECT2  
HNRNPA2B1 MAX  
LYN TRIP10  
AP3D1 MAP2K7  
PHB CWC15  
POLR3D POLR2H  
ADAM9PACSIN3  
MYO1CNEK6

GRB2 KCNH7  
TBP TAF15  
PRKAR1A MYO7A  
ATP1A1 SNX6  
ANXA2 S100A10  
APOE MAP2  
MYCN MXD1  
TGOLN2 IGF2R  
GRB2 DROSHA  
MET RPS27A  
HLA-B PPP2CB  
B4GALT3 ARL15  
ISL1 RLIM  
PPARG COPS5  
MET GRB2  
RAB17 RABAC1  
CREB1 HDAC8  
REL UACA  
PRPF40A UBQLN2  
KCNK3 SFN  
EIF2S1 PPP1CC  
KCNK3 YWHAB  
PFDN1 PFDN2  
HIST1H4I PAK1  
YWHAZ WWTR1  
CAPN2 CAPNS2  
YY1 EP300  
AIRE HIST1H3J  
NLGN2 WNK1  
SMARCA2 MCPH1  
DCX TRIM39  
HCK ELMO1  
DCD TNFRSF14  
CAPNS1 CDK4  
ERBB2 VAV2  
GSN LIMK2  
EIF4G1 NCBP1  
SPTBN1 MEF2C  
AASDHPPT USP22  
CXCR2 CXCL6

ANAPC1 FZR1  
ACCN2 PICK1  
PRKCA GSK3B  
PRKCA GSK3A  
BCL3 MAPK3  
PLAT LAMA3  
CCT3 PPP2CA  
EDN1 ECE1  
PRRC2A WNK1  
TAF13 TAF15  
CCT6A MAP3K1  
IRS1 ALK  
NPM1 PADI4  
ANXA2 CD99  
AGXT2L1 WNK1  
VCP UBXN6  
IL1R2 IL1RAP  
AKT2 FOXO4  
ATXN1 RCN1  
SFPQ SMARCA2  
CTNNB1 PHB2  
AKT2 XIAP  
PTPRC GAB1  
E2F3 DAND5  
SLC9A3R1 CFTR  
CALCOCO2 ZNF426  
NUDT18 RABAC1  
NCK1 TPSAB1  
KRT18 PRKCE  
APP CDC37  
CDR2 MORF4L2  
MAP4K4 MAP3K1  
SUMO2 DDX17  
NR3C1 MAFF  
MAPK3 TGIF1  
MAPK3 CAV1  
KCNK3 YWHAH  
PTPRB TEC  
CD4 CD44  
RAN GIT1



TG HSP90B1  
GATAD2A DPEP2  
GNAI1 S1PR3  
CREB1 CHD3  
MAPK1 CMTM3  
HNRNPR PRMT1  
ACTA1 MARK4  
TXN TXNIP  
AHSG AKT1  
USP11 USP7  
CTNNB1 IGF2BP1  
RPS27ARNF43  
OTUB1 PRKAB1  
TARS ELF3  
MEPCE DDX17  
CHD1 SSRP1  
SLC25A38 ZSCAN16  
APBB1 EGFR  
SHC1 PPP2R5A  
RAB11B OPTN  
NR3C1 RARA  
PDLIM1 PGS1  
ATXN7 PSMC5  
MED7 LZTR1  
GAST MME  
NR3C1 AR  
TGFB1 NAT8  
COL3A1 HTRA1  
SMARCA5 HDAC2  
PSMA7 PSMA5  
SPINT2 SUMO4  
NFKB2 FBXW7  
SMARCA2 SMARCA4  
CA4 SLC4A5  
ARAF YWHAH  
UBE3A PHF17  
RHEB RPTOR  
NTRK1 MAPK3  
TGFB1RAP1 UVRAG  
CUL5 ASB7

APBB1 ABL1  
TBL1X HIST1H4I  
SMAD3 TRIM33  
RBFOX1 NOC2L  
CSNK2B FKBP3  
WISP2 IGF1  
PRKAR2A SFN  
ABL1 CKAP5  
TP53 UCHL1  
HSPD1 GLUL  
NPM1 ALK  
SF3A2 SMURF2  
ZZZ3 ZBTB9  
PTEN SLC9A3R2  
PVR PVRL3  
MAP3K10 KIFAP3  
KBTBD7 OBSL1  
CASP7 RAD51  
TGFB1 CHN2  
TRAF3IP2 CD40  
SUMO2 ERCC4  
HNRNPA1 KHDRBS1  
ENTPD5 PRKCA  
KIF5B RRB1  
ZNF461 TOX2  
CSDE1 PABPC1  
RPS6KA4 CREB1  
FANCC RPL18  
NCK1 DLGAP4  
TACR1 TAC3  
ICAM3 CLEC4M  
TBP CITED2  
DVL1 DVL3  
PHLPP1 CSNK1A1  
DVL1 USP13  
CD8A HLA-C  
SYNJ2 SH3GL2  
GAST CPE  
CDK1 AURKB  
SUMO2 RAD50

BCAS2 CDC5L  
EIF3F TRAF6  
SPAG9 MAP3K3  
MYPN TTN  
USHBP1 KLHDC5  
TNKS1BP1 CNOT6  
YWHAZ MST1R  
POLA2 ASCC2  
PSMD10 PSMD2  
RPA2 MED31  
RPS27AMICA  
BMP6 SMAD5  
DNMT1 EZH2  
EZR CNOT8  
RNF8 UBE2E2  
MAPK10 MCL1  
CUL4A WDTC1  
PTEN CAV1  
TAX1BP1 TBC1D17  
PRPF40A EVL  
DDB1 MAP3K3  
GALNT11 MUC4  
KRT18 HSPA4  
SLU7 PPIL3  
APP TAF9  
TPP1 NMB  
NRAS RASGRP2  
TARBP2 DICER1  
CUTA NR4A1  
PRPF40A WBP5  
PIAS1 PIAS2  
EEF2 PPM1A  
PCBD1 CACNA1C  
ID1 IFI16  
SNRPC EWSR1  
RNASEH2A JDP2  
CXCL12 CXCR4  
PRKCA RGS2  
UPF3B USP21  
TMED2 GORASP1

NAA38 PDCD2  
MLLT3 APPBP2  
PTPRC LEPR  
DCTD NUDT18  
UBE2D3 RNF14  
HSPD1 CDK9  
NCSTN APH1B  
APP HMOX2  
KLF4 HDAC5  
HSP90AB1 RIPK3  
POLR1A CSTF1  
TRIP13 SEMA4G  
HSPD1 SF3A2  
TERT RPS6KB1  
EIF3G EIF3B  
ZNF259 CDK5RAP2  
CSNK2A2 KLF1  
MYC ICA1  
NMT1 ARL5A  
CDC45 TOPBP1  
ITGB1 FLNA  
ARHGEF15 MOBKL3  
FAM175B BRE  
TNFRSF17 TRAF1  
EYA2 SIX1  
LDB1 LHX3  
CHM RAB1B  
EIF2S2 EIF4G2  
SMAD9 ZNF83  
YWHAQ MST1R  
PIAS2 SIAH1  
MYOD1PHB2  
UBE2D3 TRIM39  
PPP3CARCAN2  
CASK UIMC1  
KDR SH2D2A  
RAB1A MAPRE3  
BAX BNIPL  
CALCR TOPBP1  
PIM1 MAX

CCDC42 TSC22D4  
UBE2H RNF139  
SRSF2 PPARGC1A  
TGFB1 WDR33  
AKT1 SERTAD4  
KLF10 ZNF512B  
PRKCD GNA13  
OXT PREP  
CENPB HAND2  
DVL2 PRPF3  
C7ORF64 C11ORF49  
PHF2 SMC1A  
LALBA CRYAA  
NMI HDDC3  
PPARD HDAC1  
HSPA1B SRRM2  
PML UBE2U  
RAD51 FANCD2  
CD82 HLA-DMA  
CD82 HLA-DMB  
S100A8 NCF2  
STX4 LLGL1  
MYC COPS5  
PDCD6 DAPK1  
PPP1CANOM1  
JAK1 ELF3  
GSN PIK3CG  
RGS7 GNAI1  
PTPN11 NEDD9  
SKP1 NFKBIB  
EGR4 NFATC2  
CDKN2C NHP2L1  
YES1 ADAM15  
SMAD3 HDAC5  
UIMC1 ERP44  
CBX5 HDLBP  
WNK1 TNS1  
PRKACA RAP1A  
EGFR ARF4  
GAPDH ARL15

LRRC18 KCTD17  
CLTC TRAF2  
CD3D VCP  
IL1RL1 IRAK4  
EEF1A1MAGED2  
COIL BYSL  
SMAD9 RFX1  
RAB26 RPH3AL  
MUC7 GALNT14  
BAX RNF144B  
MYC SMARCC1  
PRKCA TNNT2  
GRB10 MAP3K14  
MARK3 ANKRD7  
PIAS1 UBE2I  
CEBPD CEBPG  
VHL JMJD1C  
PEA15 AKD1  
NR3C1 ZHX1  
MYH9 TRPM7  
MEPCE ARHGEF1  
ITK SMAD4  
MCC PUS7  
LAMA5 PLG  
DPM1 DPM3  
NFKB1 BRCA1  
TPR IFI16  
ITGB5 FHL2  
ANXA2 CDC42  
FASLG DOCK4  
MAP4K4 NCK1  
MAGEA11 PSMF1  
RASSF5MAP1LC3C  
DAZAP2 ZFAND2B  
MCC LRPPRC  
IPO4 BRF2  
FES RASA1  
SYNJ1 SH3KBP1  
HIST1H4I SUV420H1  
CCR10 CCL7

ZNF177 PIGM  
KDM6AZNF281  
TERF2 POT1  
RAB25 MED31  
MXRA8 WNK1  
TGOLN2 AP2M1  
NCL CSNK2A1  
PAK2 KDM2A  
LMO7 UBAC2  
NASP MAPK6  
MAPK8 MAPK14  
PLK2 DLGAP4  
SPTA1 SPTB  
LAMP1 SUMF1  
GPRASP2 DISC1  
ERBB3 SHC3  
HDAC1 HDAC9  
PDCD10 STRN4  
HDAC1 REPIN1  
APOE PSEN1  
RARB RXRA  
TAF1 CSNK2A1  
RAD1 RPA1  
RPN2 ADRM1  
MYC ARHGEF2  
CD151 PTGFRN  
HIST1H2BJ LOX  
EGFR PTPN1  
FEN1 BLM  
PSPH MOBKL1B  
PRKCZ PRKCD  
MYC HDAC1  
SRF FHL3  
ADAMTSL4 SORBS3  
SRF FHL1  
RBBP6 FBXO7  
GLP1R CALM2  
MYO1A USP20  
MAPK3 PPP2CA  
MCM6 USP49

DEK HIST1H4I  
LDB3 MYOZ2  
ACTR8 RUVBL2  
ORC4 CCND1  
SHBG KLK4  
GPRIN1ERBB4  
PRKCE TIAM1  
RFWD3 UBE2W  
MYC IQGAP2  
DEDD CASP3  
MYC SNW1  
CUL2 TCEAL1  
STK16 MBP  
STAT3 NDUFA13  
GABARAP GABRG2  
COL4A2 HABP2  
STK4 RASSF1  
GATA2 NR2F2  
MYC KAT5  
PLCG2 BLNK  
RFC1 SMARCA4  
SNRNP70 DDX17  
CCNA1 GANAB  
TP53 UBE2I  
CLNS1A EIF4A2  
CHRM1 PVALB  
MSL1 MSL2  
EZR ARF6  
COL1A1 MAG  
MOBKL3 RB1CC1  
NLGN2 NRXN1  
KCNQ2 ARIH2  
ZNF165 TCEB3B  
FYN CD36  
ERBB3 PIK3R3  
RPS27ACKLF  
PFKL TAF13  
MYC SET  
MITF MAPK1  
CFTR SLC9A3R2



USP13 FAF2  
NPM1 PPID  
LAMA5 PLAT  
SNUPN DDX20  
PLEKHA5 PPP1R13B  
PRKAR2A SCTR  
PCM1 EXOC8  
TCERG1 PIAS4  
PLAUR FAP  
YWHAB RIOK1  
SMAD4 TRIM33  
AIRE DDX5  
CDK5 DNMI  
MBP PRKCZ  
GRB2 GRLF1  
SNRNPB SRRM1  
UBE2I MARCH5  
CDH2 FGFR4  
CDH11 ATF7IP  
IKBKE TBCA  
COPS6 FBXO44  
SPARC COL13A1  
TWF1 IKBKE  
SYMPK CPSF2  
GRB2 MYLK  
SNRNPB PSMA3  
CTNNB1 CDH11  
CTNNB1 CDH8  
CTNNB1 CDH6  
RYK FZD8  
PRRC2A GRB2  
ADAMTS4 FURIN  
AKAP13 BAK1  
ITGB4 SHC1  
PCNA CCL2  
TGFB1 CDK17  
TGFB1 CDK6  
TGFB1 CDKL1  
EP300 DDX24  
SNX3 MCC

MEPCE LRRC40  
TCTA SMAD4  
NPHS1 KIRREL  
BMPR1B SOCS6  
MAPK8 FASLG  
SRC GRB10  
ATG2A GABARAPL1  
TNFRSF10A TRADD  
SYNCRIP CDK9  
TEX11 RIBC2  
THRB CNOT1  
ALB ST13  
BIN1 PLD2  
MAP2K1 GRB10  
TOM1 IL1R1  
IL28RA IL28A  
CRK ISG20L2  
GRB2 ELF2  
CHRNA4 CHRNB4  
JAK1 ARRB1  
MUC1 ERBB4  
LLGL1 ACD  
ABCD3 BRF2  
FGR CBL  
ABL1 FLNC  
PLCG1 PDE4DIP  
ESR1 SLC30A9  
NFYC GLTSCR1  
DLEU1 MED31  
IPO8 KPNB1  
TMPO LMNB2  
PSMD4 PSMD6  
RB1 ELF1  
SHC1 PAG1  
SUMO1 MEF2A  
POLD1 UPF2  
NTRK1 NEDD4L  
LDB3 MYOZ1  
MLH1 RPS5  
PCSK2 PMCH

VCP STUB1  
SMAD9 SMAD3  
PIK3R1 PIK3CA  
PIK3R1 PIK3CB  
LHX2 LDB1  
MYF5 TCF3  
IL2RB IL2  
ARHGEF6 PARVB  
SMAD3 SVEP1  
CDK1 CDCA2  
HIST1H3J PHF20  
EIF4G1 MKNK1  
EPS8 PLDN  
COX5A PINX1  
TTF1 BAZ2A  
LGALS1 LGALS3BP  
PABPC1 TRAF6  
NPM1 SREBF2  
ARF1P1 AP4E1  
PHF17 ING4  
RHOC TRAF6  
HDAC1 CCDC6  
PPP2R1A TRAF3IP3  
MAP2K5 BAD  
LIN7A GRIN2B  
MAP3K14 DDX21  
SMARCE1 NCOA3  
MED14 ESR1  
HNF4G NR0B2  
HNRNPA1 TOPORS  
EEF1A1 CRCT1  
GYG1 POM121  
DVL2 CCDC33  
NFKBIA SPRR3  
TP73 HRAS  
TRIO BLMH  
DNMBPENAH  
ITGA6 PXN  
DHX29 TBC1D17  
STAMPB MAP2K5

CDKN1A CASP3  
NID1 LAMC2  
LATS1 MYC  
ADAM15 PACSIN3  
GRIN2D NF1  
CTNNB1 CDH15  
FXR1 INSL6  
YWHAG THRAP3  
YWHAG WBP11  
SNRPE GEMIN5  
GIGYF1GRB10  
FOXP3 HDAC9  
RPF1 CPSF6  
UNC119 RUFY3  
CDK1 CALD1  
LUC7L3 TLR10  
ILK ARMC6  
PLK1 SGOL1  
FOS CSNK2A2  
RAF1 PEBP1  
PJA2 UBE2N  
YWHAG LUC7L2  
ACO2 SRRM2  
WDR5 MAVS  
NDUFV1 EWSR1  
MAP2K7 BFSP1  
NFKB1 RELA  
SSR1 SEC61B  
GPS1 COPS7A  
CRK PPFIBP2  
SF3B1 SAP130  
APP PRSS2  
DLX5 SOX10  
SRC PLD1  
MAPK13 SPAG16  
CDK9 RQCD1  
FN3KRP USP43  
RDBP RPAP2  
LCN2 LRP2  
CLU XRCC6

PJA2 UBE2D3  
YWHAG GIT1  
AURKBNUF2  
TAL1 TCF12  
PABPC4 PINX1  
SULT1E1 EEF1A1  
PIIB MCC  
RPF1 MLANA  
MTUS2 ZFP64  
HOXC4 PRKDC  
NCK1 AGER  
MYC TFAP2B  
WT1 PAWR  
ARAF PKM2  
YWHAZ ARHGEF16  
TAB2 TRAF6  
SOX1 CTNNB1  
RPIA VTA1  
RAB11A FTSJ1  
HSP90AA1 PAK1  
YWHAG MAP3K2  
RPS27A GRIN2B  
UBE2D1 TRIM55  
AKT1 MDM2  
POLR2K SMYD3  
IGFBP5 PAPPA2  
MCL1 BOK  
CAMK4CAMKK1  
MAP7D1 GPRASP1  
RFC4 RFC3  
RFC4 RFC5  
CASP3 ATN1  
TCEB3 TCEB2  
LIG4 APLF  
KHDRBS3 HNRNPK  
GRB2 SUV39H2  
MCM7 TRAF6  
HSPA1L MAP3K3  
MCC NAA10  
ZFPM2 MTA3

C4ORF17 COPS6  
TCEB3 TCEB1  
RPS27A MAP3K1  
PSMD3 PSMD13  
ZBTB7A SIN3A  
APP BCAP31  
MAPK13 KIAA1967  
NR2F6 THRB  
CCT8 GPN1  
HPGDS HK3  
PLCG1 FLNA  
NT5C2 NUDT18  
CHEK2 PPP2R5B  
KCNC1 ANK3  
CASP2 XIAP  
DVL2 CPSF7  
PBLD TRIP13  
CHEK2 PPP2R5A  
LDOC1 ZNF250  
CUL3 KEAP1  
CTNNB1 PKP4  
BAD PIM2  
PRKAR2A AKAP5  
RB1CC1 CDK19  
BAD PAK7  
NBPF3 EWSR1  
EPB41 CBR1  
NFYB DRAP1  
WASF1 NCKAP1  
FN1 TH  
BUB1 PLK1  
OFD1 VOPP1  
SLC9A3R1 SLC22A9  
RXRA PRKD2  
TGM2 RELA  
CDC25B YWHAZ  
CTPS YWHAG  
BRF1 POLR3F  
PSEN2 ECSIT  
GTF2F1 GTF2A1

USO1 RAB1A  
MYC ATP2A2  
VCAN XCL1  
WNK1 CENPJ  
STAG3 SMC3  
ARL2 TBCD  
FUNDC2 ARL15  
MEF2A ITSN2  
RAD1 FEN1  
MCC IARS  
TAF10 FAM48A  
FOS NEFM  
C17ORF28 RBBP8  
SAP18 NCLN  
EPS8 MYO15A  
BAG2 RELA  
CTBP2 PNN  
CRYAB HSPB1  
RPF1 NFE2  
NEFM ETS1  
GTF2E2CKLF  
BRF2 CCDC59  
SMAD3 PRDM4  
IKBKE VAMP3  
BRF2 PTPLAD1  
RPF1 SRSF7  
TP73 TTLL5  
PEX6 PEX26  
UBC IKBKE  
ZBTB48C7ORF34  
RIPK2 RPL38  
VCP NSFL1C  
YWHAH RIMS2  
ESR2 MED17  
ARF6 FANCI  
TOP1 SRSF11  
HLTF BRF2  
FURIN ADAM19  
PSMD11 IGSF21  
HOXD13 SMAD5

UBE2E2 STUB1  
PPP4R2 DDX20  
ACTN4 CTNNB1  
SOCS3 PTPN11  
ACTN4 NOS2  
MTIF2 NFKBIB  
HSP90AB1 PPID  
YWHAG RSRC1  
CDC37 LOXL4  
NUDT21 NIF3L1  
PTP4A3 CDK2  
GTF2F2 POLR2G  
RAB1A GOLGA5  
XRCC5 HSF1  
ACTN2 ST7  
ITGB1 GNB2L1  
AKT1 PAK6  
CDC25B FOXM1  
PPP2R1A NFKB2  
ATXN1 TRIP6  
MAP3K7 PPM1L  
CD4 PTPRC  
THRA SLC16A2  
PIAS2 NAV2  
MAP3K8 LGALS3BP  
TES TLN1  
SHC1 CD81  
PRMT5 CTDP1  
MAP3K7 RELA  
SNUPN PEX5  
TMED10 APH1A  
CCDC130 EEF1A1  
CDC34 PPP1CB  
INADL KCNJ15  
TLE1 SIX3  
ANGPT2 TEK  
SCAND1 ZNF434  
MEPCE MOBKL1B  
UBQLN4 MIF4GD  
RAF1 YWHAQ



MAPK13 PRKD1  
IKBKB SRC  
XRCC6 KIAA0182  
XRCC6 NCOA6  
USP14 CXCR4  
PLCG1 ITK  
TCF3 TAL1  
PSMD11 TUBB2A  
CHMP2A USP8  
CASP3 NFE2L2  
SQSTM1 SH3KBP1  
SNAPC5 NOL4  
CASP9 BIRC7  
TK2 C7ORF64  
AP2M1 LY9  
PSMD1 TNFRSF10D  
HNF1A KAT2B  
CSDA PCBP2  
KRT31 LYAR  
UBE2D3 RNF11  
CSTF2 CSTF1  
HMOX2VOPP1  
PTPRC CD79B  
LZTS2 PAK7  
CCL4 CCR1  
ATAD3B USP20  
NFYB TAF6  
SNRPD1 SNRPD2  
LGALS3BP MAP3K1  
PBX3 AGTRAP  
PSMD14 SUCLA2  
CDC20 RASSF1  
TSHR GNA11  
DNPEP PADI4  
SRF GTF2F1  
HSP90AA1 TRAF1  
PPP1CBRIPK3  
BACH1 BRCA1  
KIF3C DISC1  
GATA3 TBX21

GLIS3 SUFU  
SSR4 SSR3  
PDK2 ISOC2  
ALOX5 MAPKAPK2  
POLE2 EEF1A1  
AP1G1 NECAP2  
NCKIPSD DIAPH3  
NIF3L1 MLXIPL  
NFYA ELF1  
RAB25 PKIG  
FYN NCK1  
VHL HIF3A  
SCAMP2 YWHAZ  
VHL USP20  
GRIN2B CAMK2A  
SSSCA1CCT5  
EWSR1 ZNF383  
CREB1 PPP1CA  
FSHR ZBTB16  
ATG13 ULK1  
PHB SIN3A  
KDELRL1 WBP5  
STX11 VAMP2  
RASA1 EPHB3  
ASH2L HCFC2  
ERCC5 TAF10  
WDR5 KIAA1267  
NKX2-5TLE1  
SYTL4 USP20  
HSPA1B TTC1  
SMNDC1 SNRNPB  
SAP18 HSPB1  
CALCOCO2 TP53RK  
ACTN2 DISC1  
PNLIP GRB2  
C7ORF36 KIAA1377  
RDBP THIL  
PABPC1 MAP3K14  
SNCA SLC6A3  
RIPK2 TRAF2

MAP2K6        MAPK12  
PSMF1 CTBP2  
PKM2 YWHAZ  
MYO1APHLDA3  
ELL    ZHX1  
SEMG1 SEMG2  
MCC    GNPDA1  
IRF9    DACH2  
MCC    EIF2B1  
STK25 STRN3  
CREBBP        CDK5RAP3  
AZGP1 USP53  
POLE    TOPBP1  
KRT85 DLG3  
CGN    TJP2  
RNF31 RBCK1  
UBE2D2        BIRC3  
CCL18 C14ORF1  
PTPN6 PILRA  
INPPL1 SORBS1  
PTPN6 PILRB  
MDC1    SMC1A  
DNM2    CCR5  
RAF1    MAPK3  
TOM1L1        GLUD2  
HNRNPL        DOCK4  
FBXO18        PIM2  
MMP1    CCL7  
BRCA1 MAP3K3  
BTK    IBTK  
EIF2AK2        STRBP  
KCNC1 KCNV2  
GLRX3 ADAMTSL4  
PCBP1 PDLIM7  
FSHR    YWHAQ  
STAT3 CTR9  
HSP90AA1        FAM162A  
SNRPA SMAD5  
UBE2E2        TRIM2  
ANXA2 S100A4

EED DNMT3A  
GTF2B NCOA3  
KHK CDK5RAP3  
BRCA1 BARD1  
SPTAN1 IKBKE  
PIK3C2B PDGFRB  
DARS EEF1A1  
TEC FASLG  
MLH1 RPS27A  
MTNR1B HNRNPA0  
STX6 VAMP4  
KAT2B NOTCH3  
PLRG1 BCAS2  
HIF1ANASB4  
PDIA6 TNFRSF14  
APP LDLRAP1  
ATXN3 OTUB2  
SPTAN1 ABI1  
TOM1L1 PIK3R1  
SRSF3 NXF1  
PPP3CAFKBP8  
KLRB1 CLEC2D  
DNAJA1 RIPK1  
OPRM1 GPRASP1  
WNK1 MSL2  
C4ORF43 LYAR  
AHR DAP3  
KIF5C CSNK2B  
NFKB1 COPB2  
MCM7 PRKAB1  
FANCA PRPF31  
PRNP TSC22D4  
GRB2 SH2B1  
MELK CDC5L  
SLC22A5 PDZD3  
PTEN STK11  
BRE SLC25A13  
HSPA1B MAP3K5  
BRCA1 RBBP8  
SCNN1A RPF1

LANCL1 YWHAZ  
PABPC4 INSL6  
G3BP1 NUP188  
CDK1 CSNK2B  
MPHOSPH10 PPP1CA  
IKBKE TICAM1  
FANCA FANCM  
XRCC5 NFKB2  
PLEKHA5 RBFOX1  
DLGAP1 PIK3R1  
YWHAG EPB41L3  
CALML3 KIAA1683  
BCL2 MCL1  
FOS NACA  
USP11 AMOT  
BCL2 BAX  
PIK3R2 ERBB2  
BCL2 BCL2L1  
CAPN1 UFSP2  
PI4KA MTNR1B  
PIK3R1 SSTR2  
API5 PRKAB1  
YWHAB RP5-862P8.2  
ILF2 MEPCE  
RRAS SOS1  
GRM5 HOMER1  
ITPK1 TRAF2  
NOL3 BAX  
VHL UFC1  
LCK TRAT1  
PARN NCBP1  
ARHGEF18 WNK1  
ZYG1 ENAH  
ARF6 SMARCC1  
SRC ADAM15  
TFE3 NAP1L1  
PSME1 ITGB3BP  
CCDC116 KRTAP4-12  
YWHAG PTPN14  
PHF14 ETS1

ADCY2 GNAS  
CD44 ARHGEF12  
ANXA5 PPP2R1B  
ATP5J2 FBP1  
ACLY CCNA1  
PBX2 CENPBD1  
XRCC6 ZNF512B  
ANK1 SLC4A3  
TAF13 TAF9B  
IPO7 YWHAZ  
TLE1 MPHOSPH6  
MSX1 TLE1  
LIN7A SLC6A12  
ABLIM3 ACTC1  
PARD3 PARD6A  
TM4SF1 TUBA4A  
MCM3AP TRIB3  
HOXA1 EFEMP2  
VHL MRPS23  
RAB11A TRAF6  
ESD GRB2  
ARAF TH1L  
GRIN2B EXOC7  
VHL MRPS16  
PPP4C CCT2  
PPBP SCFD1  
SOX3 SUMO1  
SRC NCOA6  
GPC4 SQSTM1  
MED22 MED28  
CDKN2C APLP1  
EIF4B RPS6KA1  
GNAS SNX13  
CCNT1 NUFIP1  
YWHAB WDR77  
MPG PAFAH1B2  
DLK2 KRTAP4-12  
WNT3 FZD1  
PKD1 PKD2  
KRT31 DLG3

LIN7A KCNJ4  
VHL CCDC82  
FASLG SNX18  
PTPN6 SPATA2  
VDAC1 KIF5B  
POLR2E MED19  
SNIP1 DROSHA  
MBD4 FADD  
RPS27A TARDBP  
TRIP13 PARP11  
FLT1 ATR  
RIPK2 GXYLT1  
PIAS2 STAT4  
SKP1 FBXO6  
LDB2 RLIM  
SYNCRIP SYT8  
PSTPIP1 DSPP  
SKP1 FBXO8  
CXCR2 ST13  
CREB1 KIAA2026  
RPL5 RPL23  
PTP4A2 CNNM4  
TNKS MCL1  
PRKG2 LASP1  
CANX PDIA3  
SYCP2 CAV1  
MYOD1 RPS27A  
ACTA1 ACTR10  
RPS27A AIMP2  
AR NR5A1  
RPS27A FADD  
TCAP MYOZ3  
RAB11A MYO5A  
MCPH1 SMARCC2  
YWHAG NCKAP1  
HDAC3 CBFA2T3  
NOP56 MEPCE  
FN1 KLK3  
ACP6 DHCR7  
PRNP APP

CYP27B1 MED12  
SLC25A11 CAMKK2  
RBFOX1 MAGED1  
PARK2 HOMER1  
RB1 CBX1  
SIPA1L1 SFN  
STAT5A SMARCA4  
PRPF3 USP39  
VHL MOBKL3  
SNIP1 TOPORS  
THBS1 CD47  
EWSR1 SALL2  
KAT2A TACC3  
RB1 RING1  
GNG7 GNB3  
SKI SNW1  
HLA-B SND1  
PCGF6 PRKAB1  
ACTN4 SLC2A4  
TRAPPC3 FASN  
MCM7 RBM8A  
POLR2H IKBKE  
RLF RIT1  
EIF4E2 MDFI  
MED28 MED4  
RPS27A PAK2  
RPS6KA3 PEA15  
MON1B VPS33A  
MAPK14 DUSP22  
EWSR1 PRKAB1  
PARK2 FBXW7  
RBBP7 NR2E3  
FAM3A PSMD4  
PPP2R1A PPP2R2C  
CRMP1 FAS  
MKRN3 UBE2V2  
EXOC7 ARFGEF2  
OMA1 APLP1  
BCL3 CYLD  
MAPK14 DUSP7



MAPK14 DUSP6  
MANF IKBKE  
GPRIN1PLCB4  
CD8A CD8B  
RTCD1 RPL28  
MCM7 ORC6  
A2M MMP2  
PAK3 NCK1  
SH2B2 EPOR  
CSNK2A1 SIN3A  
GRB2 PTPN14  
PPP4C IGBP1  
YIF1A YIPF5  
UFM1 UBE2D2  
RABEP1 GGA2  
RABEP1 GGA1  
PTPN6 TFG  
CASP3 BLM  
PAX8 RSBN1  
GH1 LTA4H  
RPS27A TRAF3  
CBFA2T3 NCOR1  
AGPS ATG16L1  
RAF1 RSU1  
H2AFX MRE11A  
MAP3K7 EPRS  
USP8 CHMP1B  
EEF1A1RSRC1  
AXIN1 MYC  
PTP4A3 EIF4G2  
PTP4A3 GTF2I  
VCL VASP  
BCL10 CARD11  
BCL10 CARD14  
EEF1A1BBS2  
GTF2B MKX  
AKAP17A EIF4A2  
GHR NCK1  
SNAI1 TP53  
CDH1 ACTG1

HDAC3 BRMS1  
LPHN1 DLG4  
RPS5 RELB  
TOP1 TOPORS  
PTPN6 SIGLEC10  
GPS2 NR0B2  
ITGB2 PRKCA  
TBP TCEA1  
CHAF1B SETDB1  
PPP3CAC16ORF74  
CCNT1 AFF4  
EFS SORBS3  
STAT5A BRCA2  
CASK HGS  
RPS27ANR1H3  
SUPT7LSERTAD2  
ZSCAN20 SCAND1  
CD79A FCAR  
AR SELENBP1  
TPT1 VHL  
MITF PAX3  
FYN PDGFRB  
PPP1CAKIF18A  
APP NF1  
GSK3B RCAN1  
APBB1 ERBB2  
FKBP8 WNK1  
HSPD1 BAX  
KDR CRK  
CCNA1 SOAT2  
PIWIL1 TP63  
UBE2D2 RNF2  
NCK1 SNX17  
MZT2A IKBKG  
NOL3 ETNK2  
PPP1R8 C7ORF64  
HTR2C LIN7C  
COL4A1 ACHE  
SMNDC1 KPNB1  
RPP30 BVES

PTP4A3 PSPH  
KALRN FASLG  
CAND1 DCUN1D1  
MAPK1 CALCOCO1  
GRB2 FAM59A  
NCK1 ACAP1  
CDH5 CTNNB1  
SYNCRIP TP63  
CDH5 CTNNA1  
MITF PIAS3  
HNRNPM RELA  
PARK2 PLCG1  
RCBTB2 COPS4  
PPP1CACDC5L  
PRKCA SEMG2  
GOSR1 SNAP25  
AP2A1 MYC  
IKBKB LYZ  
NUDT21 RNPS1  
APP APLP1  
NARS IKBKE  
NCOR1 HDAC7  
FN1 P4HB  
CCNA1 RBM4  
CASK APBA1  
SLC9A3R1 ATP6V1E1  
DNTT XRCC6  
LDB1 LMO3  
UBE2D1 RNF26  
ATG16L1 GABARAPL1  
ITGB1 FBXO2  
INSR IGF1R  
HAT1 HIST1H3J  
POLR2B RPAP3  
GRB2 HMGN3  
TRAF2 TIFA  
RGL2 CCDC90B  
MAPK1 STAT3  
SUPT5H DBN1  
PPM1A PRKCD

CCL4 CXCR5  
NOP2 MAP3K1  
PGR SORBS1  
HOXB9 BTG2  
FAS MAP3K5  
MARK3HDAC7  
NFKBIA RELB  
QKI RNF138  
BCL2L1SPNS1  
ALOX5 ALOX5AP  
RGS14 GNAO1  
MED10 MED20  
LDOC1 SETD5  
PPBP DMWD  
HSPB3 UNC119  
CASK EPB41  
HDAC3 NR2C1  
SMAD3 GGA1  
RAB3D RIMS2  
MEN1 FANCD2  
SYT1 SIN3A  
TPST1 GPR1  
CLU VLDLR  
AK2 IKBKE  
PIK3R2 SOS1  
POU2F1RELA  
HIST1H3J PHF20L1  
RUNX2 TAF1A  
NOTCH1 CNTN1  
INHBA INHBB  
OMA1 ITGB5  
FYN CTLA4  
VTN PLAUR  
ACTN2 DLG4  
TCF3 PRKACA  
SLC7A9STRN4  
ITGB1 EPS8  
ABL1 ITGB2  
PTN PSMD2  
CUL4B DCAF8

SLC1A1EWSR1  
NCOR1 ESR1  
BCR PTPN11  
SMARCB1 KLF1  
EPB41 CD44  
TCEA2 CENPT  
LIN7B GNG13  
NECAB2 CCDC33  
MTM1 MTMR12  
CENPA ACTB  
BCAR1 YWHAZ  
GRB2 MEPE  
PXN RAB8B  
SAP18 RPN2  
RASSF5ERP44  
MAP3K7 XIAP  
MYH11 STAT1  
RNF213 MCRS1  
APOA1 APOB  
SRCAP CARM1  
TTI1 PTP4A3  
EIF4G2 EIF3A  
ST13 MEF2C  
RIPK2 UBE2I  
DPEP3 GATAD2B  
ERBB2 GRB2  
FASLG FNBP1  
GSK3A SPICE1  
ERBB2 RPS27A  
INTS8 UBE2Z  
MAP2K2 CNKSR1  
RCHY1 GORAB  
USP7 CLSPN  
STX2 STXBP2  
CNTFR APPBP2  
SCN5A SNTG2  
SLC25A6 NFKB1  
EIF2B2 MAPK14  
GRB2 SH2D4A  
STX2 VAMP3

RIPK2 ACTG1  
RPLP2 NFKB2  
LUC7L3 COLEC11  
MSN FADD  
MCM6 IL1F5  
CASP3 XIAP  
CUL4B WDTC1  
RNF8 MDC1  
APC USP9X  
SMAD3 LEF1  
TADA3 CTNNB1  
RIT2 RGL1  
TRIP11 TRIP6  
EID3 CREBBP  
CBL MYO1E  
MAGEC1 ECHDC2  
ACVR1 NEK8  
TGFB1 CTGF  
STX6 VAMP8  
UCMA MEP1B  
SMARCB1 ATM  
STRN3 CCT7  
GPN1 DPEP2  
TGFB1 PLEKHB1  
NFKB1 MYH10  
PAXIP1 SMC3  
POP7 RPP25  
JAK2 STAP2  
IKBKE LRRC59  
BNIP3L TMEM11  
FER DNM2  
UCMA MEP1A  
EEF1A1 BTBD2  
DAND5 SRF  
CBLB ARHGEF7  
HLTF UBE2V2  
ERBB2 RPS27A  
RUNX1 SIAH1  
CCT6A STRN3  
MOBKL1A LATS2

MLL2 CTNNB1  
NFKB1 MYH9  
HDAC3 KDM4A  
NFKBIA C14ORF49  
PCNA DHX9  
TUBA4A TAOK2  
DCK MED19  
SMAD5 MTMR10  
GH1 MTHFD1  
ERH RNPS1  
MYH10 STAT1  
SIN3A MXD3  
DAND5 CDK4  
ELN NID2  
MT-ND5 DAND5  
LCK STAT3  
MYO7AVEZT  
BMPR1B NKIRAS1  
ACTA1 CLIC5  
VAMP4 VTI1A  
PIP4K2B BTK  
DYNLL1 PHLDA3  
ZNF607 MDFI  
PSMB4 POMP  
KRT34 YWHAG  
TPM3 VDAC1  
BRF1 PCBD2  
RPA3 RAD52  
GRM7 GRIPAP1  
DAND5 SP3  
YWHAE GRAP2  
UBE2D3 PRKAB1  
SKI SMAD4  
ABL1 PPP3CA  
PRC1 TRIM37  
MBP RTN4  
CFLAR TRAF2  
USP2 BEGAIN  
ULK1 SYNGAP1  
IGF1R PIK3R3

APOE ECSIT  
NOTCH1 LFNG  
OPRK1 GPRASP1  
TLE1 HLA-DQA1  
VPS28 TSG101  
APOA1 LCAT  
VIM DEFB1  
SRC KCNB1  
TDP2 TRAF2  
NPM1 HLA-B  
TUBG1 CEP55  
TRIM23GGA2  
NPM1 RELA  
CD2BP2 KHK  
TLX1 PPP2R5A  
TRIM37EWSR1  
GAPDH GSS  
IKBKAP MAPK8  
OGT SRF  
TP73 MYC  
RHOQ CDC42BPG  
GNMT NUDT18  
EPHA3 EFNA3  
TLE1 FXYD6  
EPHA3 EFNA4  
EPHA3 EFNB2  
BMPR1B RASL12  
BCL2L1BCLAF1  
S100A1 SMAD2  
MF12 DERL1  
ACAN FBLN1  
LRPPRC ARF6  
STAT3 CSF3R  
KDM1ASETDB1  
MYOD1RORA  
BLOC1S3 MUTED  
TNFRSF10B TRADD  
KCNH4 GRB2  
MAPK11 DUSP10  
RB1CC1 SMCR8



AGRN DAG1  
UCMA GRPR  
CLINT1 GGA2  
ACVR1 DUSP13  
RAF1 RRAS2  
YWHAG TAB1  
DMD ACTA1  
HSPA1B HCFC1  
BAG6 EP300  
DRAP1 PIK3R3  
VHL NEDD8  
PCBD2 DYRK1B  
BIN1 ZBTB3  
TAL1 RBBP7  
LMNA KAT5  
FOS CUL2  
FSHR APPL1  
UBE2U ANAPC11  
FOS PPP5C  
TOB1 KHDRBS1  
CSNK1E CRY1  
PSTPIP1 RPL35  
SQSTM1 NSUN4  
CLU LRP2  
RAB14 SMURF2  
COL4A2 FAM46A  
SKIL CPNE4  
YWHAG LRCH3  
CREBBP HES6  
FGD1 ELMO1  
PSTPIP1 WAS  
NUDCD1 USP36  
CCT6A YWHAZ  
NFE2L2NCOR2  
PEX14 PEX13  
SHC1 RET  
HNF1A CREBBP  
HLA-A PRKAR1A  
PTPN11 LILRB4  
ARF6 KHSRP

UBE2H RNF133  
CEBPE DENND4A  
EIF4E EIF4G2  
HSP90AB1 UBA1  
PIK3R2 CBL  
PPP1CBIBKKG  
PFN2 WDR33  
COG3 COG8  
PPFIA2 PPFIBP1  
TAB2 NUMBL  
CSNK1A1 ACTA1  
HDAC1 ZNF148  
WAS CSNK2A1  
FES CSF2RB  
UBE2D3 TRIM17  
NTRK1 RUSC1  
ATG12 KRT82  
TAB2 TNFRSF11A  
GRB2 TP63  
IFFO1 RNF183  
USF1 PRMT1  
FGF2 CSNK2A1  
GRIN2D SPTAN1  
TGFB1I1 PTPN12  
AIRE GRB2  
SRPK2 RNPS1  
ARHGAP21 WNK1  
MAP2K1 TRAF3  
NAT9 LUC7L2  
ZNF250 HOOK2  
SRC TRAF3  
HSPA13UBQLN1  
IARS AKTIP  
FOS SUMO2  
SORBS2 MAP4K3  
DUSP19MAP3K5  
RB1 PPP1CC  
VCAN SELP  
IL27RA IL17D  
SETDB1 ATF7IP2

SF3A3 SREK1  
YWHAQ MDM2  
RPL30 NFKB2  
CCL21 CTSD  
MDM4 RPS27A  
DPEP3 SRRM2  
PIK3R1 GNAQ  
TNF CDC42  
TCEB1 ARID1B  
ZFHX3 PIAS3  
SMAD7 SMURF2  
EXOC3 EXOC4  
FLT3 INPP5D  
CTSB ACAN  
SFN CCDC101  
CDK9 SKP1  
MAF CREBBP  
KDM1AHSPA1B  
RAB1A MICAL1  
DPPA2 AP2M1  
TIMP2 NPEPPS  
TP53 CYP27B1  
AKAP14 MYCBP  
C7ORF30 CHMP2B  
NCK1 ERBB4  
UNG RPA2  
HLA-B TAGLN2  
DPEP3 MBD3L1  
FYN HOXC8  
ATP1A1 CFL1  
MCC DDX21  
ENG ACVR2B  
ITGB1 PDIA3  
BTF3 MED21  
TUBA3C TAB2  
MED26 MED21  
DNMBPWIPF2  
GNA15 HRH4  
USP13 ITCH  
BCL10 CARD9

DRD3 CLIC6  
MAGI2 DSCAML1  
BMPR1B FANCL  
LMX1B LDB1  
PRKCB PPP2CB  
IGF1R ARHGEF12  
DNAJB1 CDC37  
YWHAB CTTN  
GBAS TARS  
HCK INPP5D  
CD1D P4HTM  
COL2A1 MATN1  
MYB NCL  
APOM KLF6  
CPN1 CPN2  
PREPL USP22  
CDKN2A MCM10  
LCK PTPRC  
UBE2D3 RNF114  
VPS35 TRAF6  
FGFR1OP PPP2CB  
LRP3 GGA2  
TNFSF15 TNFRSF25  
LRP3 GGA1  
EIF1B CSNK2B  
PSMD14 RBM15B  
COG2 COG4  
RPS29 STYXL1  
CREB3 EMD  
CALCOCO2 TRAF2  
CUL4A WDR5B  
PPM1B S100A8  
CDC73 FIP1L1  
SFN EDC3  
RPL5 RPL11  
ADORA1 GNAS  
GATA2 AKT1  
MAPK14 PI4K2B  
NTRK1 IRS1  
DNAJC19 TIMM17A

QARS PRRC2A  
ATG16L1 GAN  
CYP2C8 BLMH  
LYN CD22  
FCHO1 ZBTB16  
MYH9 MARK4  
NCL S100A11  
ASXL1 BAP1  
STK25 YWHAZ  
SUMO1 CNTN2  
RPS6KA4 MAPK1  
SEPT4 SNCA  
SOX10 UBE2I  
DLST DLG5  
MAD2L1BP KAT5  
XPA MSH2  
PACSIN1 PACSIN3  
ACVR1 PLEKHB1  
TUBB2B HDAC6  
CASP3 PKN1  
CASP3 PKN2  
XRCC4 C9ORF82  
MRPL41 TRIM63  
CTSL1 CD7  
NEBL ZYX  
MED12 MED10  
EEF2 NDRG1  
DNASE2 RUVBL2  
SUV39H1 RUNX3  
CIAO1 MMS19  
CBX1 EHMT2  
ACTN2 MYOZ1  
RBFOX1 NUMBL  
IMMT FAM173A  
GRB2 SS18  
CBL PTPRJ  
SRC CBLB  
MAGEA1 TRIM31  
EMD DPY30  
TICAM1 AZI2

MTA1 BCL11A  
DVL1 SMAD7  
PARP1 RBM14  
SS18L1 RFX6  
SIAH2 AFF1  
JUND DDIT3  
GHR PRLR  
TFAP2C CITED4  
ATG2A MAP1LC3C  
ITGAV PDGFRA  
RELB CIQBP  
EED EZH2  
CSTF1 BARD1  
DNMT1 CXXC1  
YWHAZ SYNPO  
THRA CCND1  
UBE2D3 TRAF6  
AP1G1 CLINT1  
TOP1 TDP1  
IL2RB PIK3R1  
PTN GNB2L1  
RPS27AXRCC4  
VEPH1 TSC22D1  
OMA1 APP  
MCM7 IKBKG  
PAPSS1 EEF1A1  
HOXA11 FOXO1  
CCND1 HERC5  
WDR48 GPN1  
HSPA1L MAP3K14  
MTF1 AP1M1  
LHX1 LHX3  
PIN1 CHPF  
PDGFRA PDGFC  
UBE2D3 RNF115  
ARHGEF19 DAAM1  
ROCK2 IKBKE  
CIAO1 FBL  
YWHAG PGAM5  
RAB37 EWSR1

CEBPB PPARG  
PITX1 NR5A1  
RPS27A BIRC3  
PAK7 LZTS2  
ABL1 EPS15  
EIF1B SEC11A  
MARK3 PKP2  
HIST1H3J TSSK6  
ESR1 RELA  
RPS27A SMAD4  
RAMP2 IAPP  
FYN SPN  
COX5A VHL  
PPM1B ISG15  
KIFAP3 DISC1  
ATG16L1 ATG5  
CENPN AKTIP  
TPM3 SUMO4  
GIPC1 NTRK2  
RPS27A BIRC2  
TACR2 TAC1  
GLRX3 EFEMP2  
ZNF155 NDRG1  
PWP1 LYAR  
ACVR2B IGSF1  
PRPF4 VBP1  
RB1 BDP1  
FYN ITGB4  
SMAD4 SMAD9  
ARID1A HIC1  
ZNF587 RAPGEF2  
MAP2K1 PAK1  
PSMD8 SMAD2  
RPS6KA3 GSTK1  
COPS6 COPS3  
ACTA1 KIF23  
MAP1LC3C ATG4B  
EMD YWHAE  
SNAP91 AP2A2  
HES1 FANCL

SNAPIN BLOC1S3  
ABCD3 ABCD2  
SNAPIN BLOC1S2  
DLGAP1 CTNNB1  
KCNH4 MAPK3  
ZAP70 GAB2  
GRB2 ARID2  
GTF2B CTDP1  
XIAP XAF1  
TGFB1 DCAF12  
CCNT2 RB1  
NIF3L1 PRTFDC1  
MDM4 CDK1  
MYOD1DDX5  
FSHR GRK6  
DDX5 SMARCA4  
DEK EP300  
NEDD4L NDFIP2  
SRC PAK2  
GRM5 PRKCD  
FXR2 C19ORF50  
COPB2 TSC22D1  
CASK NRXN2  
HSF1 PPID  
ARHGDIB RAC1  
VIM INSL6  
TNFRSF1B TRAF3  
S100A9 ILK  
SMARCA4 SMARCD1  
HSPA1B HSF1  
PDPK1 PNN  
PSMA7 RIPK2  
GNB1 MST1R  
VDAC1 C9ORF163  
HDAC2 WHSC1  
SNRNP70 PRKD2  
GRB2 PTPN23  
KPNA3 RELA  
PSMD10 PSMC2  
PSMD12 PSMD10



MDFI LRDD  
HTT RPS27A  
PPFIA3 PPFIA1  
TADA3 KAT2A  
MDM4 TP73  
CSK DAG1  
EZR PRKCA  
C14ORF48 SKA1  
TERF2 TERF2IP  
KRT33B USP15  
BCL6 EP300  
TADA3 KAT2B  
TNP2 PARP2  
PRMT2 ESR2  
PSMD6 MTHFD1L  
YWHAZ KIAA1429  
UBC FBXL15  
MYC NUP205  
DCTN1 BICD2  
STAT3 EP300  
FXR2 RTN3  
MYC GCN1L1  
CSK SCARB2  
PSMB4 TRAF6  
GNB2L1 GOLM1  
MYOG MEF2C  
TCAP SMURF2  
TUFM TRAF6  
SDPR PLEKHF2  
HSP90AA1 HSPD1  
DVL1 AXIN1  
GRB2 HIPK3  
PSMB6 EZH2  
TGFB1 ASH2L  
HNF1B CREBBP  
SYT1 RBM14  
STK16 ADAMTSL4  
SNRPB STXBP2  
ACTN2 MYOZ2  
CYTH3 CYTIP

DUSP1 SKP2  
DOK2 SRC  
VEPH1 SMAD1  
HSPB3 PRPF4B  
ATG12 ATG3  
COL1A1 CD36  
DST PRKD2  
RB1 SKIL  
HSPG2 FGFBP1  
RB1 SKI  
HTT GRB2  
SH3GL2 ASAP1  
GFI1B RINT1  
EGFR RPS27A  
DLG4 ATP2B2  
SNTA1 KCNJ12  
TRIM32UBQLN1  
TUBA4A ARHGAP1  
PPIH PRPF18  
ACTB PFDN4  
ENSA ENO2  
IL1RN IL1R2  
HDAC1 MTA3  
TP53BP1 MCPH1  
EGFR GRB2  
RPS27A PIN1  
GSPT1 ATXN1  
AIRE HIST1H2AC  
GTF3C1PRPF38A  
DNASE2 RUVBL1  
ANAPC7 ANAPC10  
CD3E ZAP70  
EPS15 CLINT1  
UQCRC1 CYCS  
CD3E SYK  
CSH2 TSC1  
PTPRC CSNK2A2  
MARS NFKB2  
MXI1 MYC  
ERBB2 MUC1

GEMIN4 GIPC1  
SNTA1 SCN5A  
PER2 TIMELESS  
PABPC1 ATXN2  
MYCN CSNK2A1  
NR3C1 PRKDC  
CDC45 CDKN1A  
PLCG2 EPOR  
ZFP36 YWHAB  
MAPK9 DUSP10  
KPNA3 RAC1  
ZFP36 SFN  
HPRT1 VHL  
TNFRSF1B TRAF1  
YWHAZ MINK1  
HMOX2CSNK2A1  
RPS27ASQSTM1  
EIF1B UBE2I  
KRT4 APC  
TLR4 BCL10  
TCERG1 SFPQ  
CALU APCS  
GRB2 TMX1  
SLC9A1CALM2  
GNG4 GNB4  
XRCC5 NAA15  
HDAC3 SAP30  
PRKCH FAM50A  
RFC1 RELA  
PRKCA CD9  
ITSN1 PIK3AP1  
WFDC5 SMC3  
SNRNP200 PRKAB1  
MSN ROCK1  
ZAP70 SH2B3  
KIF5B RANBP2  
WAS CIB1  
TIMM23 TIMM17B  
CBX7 H3F3B  
CSK FHL2

RGS20 TRMT112  
SAP18 PCBP3  
GAS8 TP63  
DRG2 MAX  
IRAK1 IRAK1BP1  
PML ANKRD2  
CLTC SNX5  
EEF1A1 PSG4  
CCND3 NPDC1  
EIF3F DKC1  
CLTC SNX9  
IL18 IL1RL2  
NANOS3 ACTN2  
GRB2 C15ORF24  
PRPF40A ZHX1  
ATXN1 SC4MOL  
CCT7 TBK1  
PPARA PPARGC1B  
JTB LRIG3  
IKBKE IGF2BP1  
MARK3 ASB13  
YWHAQ MEF2C  
RPAP1 ANAPC1  
MAP1LC3B TMEM160  
BAG6 PTPN12  
SPI1 MYST3  
CD5 PTPN6  
SPI1 CREBBP  
MEN1 PSIP1  
SGK1 GSK3B  
SGK1 GSK3A  
NES SRRM1  
UBE2D1 AMFR  
SFN FAM53B  
MECP2 HIPK2  
ABL1 NEDD9  
CBL BTK  
APRT VHL  
RAC1 ARHGEF7  
RPS6KB1 MAPK1

DPEP3 SMARCA2  
BCL7B RPAP3  
UBR5 PMS1  
PIN1 EFTUD2  
PRR14 SH3BP4  
NOTCH1 LEF1  
MYC CCNH  
TRIP12 MEPCE  
CASP1 HTT  
YY1 YAF2  
TBP TAF1B  
HDAC3 GMNN  
TUBGCP2 BTRC  
PPP5C ESR2  
HIST1H3J AURKB  
MED12 MED19  
CALM2 GPRIN1  
SART1 UBL5  
BAG2 STUB1  
KIF5A RAPGEF2  
HIP1 CLTC  
KRT6A KRT15  
PRDM1 EHMT2  
HOOK3 HOOK1  
SMAD3 STUB1  
AASDHPPT TRAF2  
YWHAZ EIF4G1  
UBAC1 RNF11  
KRT1 TANK  
CBX4 H3F3B  
AP3B1 ARRB1  
GNAI3 RGS19  
TAL1 RCC1  
GNAI3 RGS3  
LPA SETDB1  
PTN APOBEC3G  
EFNB2 DLG4  
KIF5B KLC2  
EIF4G2 EIF4A2  
ARF3 GGA1

COG4 COG5  
ARF3 GGA2  
APC SFN  
CRADDCASP8  
SFN HNRNPD  
SDC3 TUBB2A  
LPL ASCC2  
DMD ACTC1  
ARNTL RPS27A  
SMAD7 ZBTB44  
BRCA1 COBRA1  
POLR1A RRN3  
DLL1 NOTCH1  
TP53 HSPB1  
PABPC1 TOB1  
PDHA1 WDR20  
KDM1AASCC2  
TMED2 ARFGAP1  
HTRA2 MAPK14  
PSEN1 RAB11A  
UBASH3A UBE2L3  
TLE1 TLE2  
ACE2 GHRL  
IMMT ECSIT  
CFLAR PSEN2  
PCBD2 KCNIP3  
LATS1 MOBKL1B  
IL2RB JAK1  
BAG6 XRN1  
MLNR GPRASP1  
RPL5 GRB2  
KRT1 EVPL  
RAC1 DOCK1  
CDC5L CTNBL1  
HSP90B1 EIF2AK3  
PSEN2 APBA1  
FGFR2 PTK2B  
DDX5 EP300  
KAT2B ING1  
YWHAQ SLC8A2

ALOX12 KRT85  
AHR STUB1  
RAB25 SMURF2  
MCC MLEC  
MCM2 UBA5  
MCC SCRIB  
RELA LARS  
PSMC2 PSMD4  
YWHAZ NOLC1  
HADHA IKBKE  
NHP2L1 INSL6  
SRF FLI1  
RANBP1 RANGRF  
HNRNPA1 PRMT8  
PDLIM1 GFAP  
CST3 ATXN1  
YWHAZ KPNB1  
TLR2 HMGB1  
MOCS3 XRN2  
PLSCR1EFEMP2  
MYO7AUSH1C  
NDST2 GRB2  
YWHAZ NUMA1  
MCC EIF3A  
RPN2 TNIK  
DRD2 SLC6A3  
FXR2 TRAF2  
SFN MAPKAP1  
ZFP36 HDAC1  
PSMD11 RUNX1T1  
OMA1 ITGB2  
CETN3 SASS6  
PLCG1 CTSS  
CAT TLR10  
ACTC1 SYNE1  
CDC37 STAMBPL1  
PTPN11 SLAMF6  
YY1 RELB  
CBX5 HDAC5  
ZAP70 LAX1

MAP2K7 ALK  
CDK1 ZBTB16  
YWHAE RASGRF1  
TGFBR1 RTKN  
SRC GRIN2B  
RAB11A RAB3IL1  
DVL2 PRKCA  
SIRT1 PPARGC1A  
PROX1 ZBTB3  
CNOT8 CNOT1  
ITGB1 CRKL  
MAP1LC3C RABGAP1  
USP49 ANKRD33  
MAP2K1 MAP3K1  
CBL PTPN11  
PLSCR1PGLS  
RPL30 MAP3K14  
RGS10 GNAI3  
BCL3 STAT1  
NRAS PIK3CA  
RFXANK CIITA  
MAP2K7 VRK2  
MAP3K11 SH3KBP1  
AR HIPK3  
ARAF SFN  
TTC35 FAM158A  
NANOS3 EFEMP1  
NUP107NUP93  
RGS16 GNA13  
MCPH1 TERF2IP  
ILK XPO7  
YY1 BRCA1  
DAND5 ELF1  
SPAG8 UBQLN4  
SDCBP CD6  
PRKCB GABRG2  
HDAC4 CAMK1  
TOM1 EEA1  
PIK3R1 TEC  
PIK3R1 ABL2



ESR2 MMS19  
MCC ICT1  
HLA-G LILRB1  
HNRNPH1 GPN1  
ORC1 TERF2  
PSMD7 NFKB2  
PRKCB GNA12  
EPB41 FKBP1A  
SDC3 CUX1  
SLC38A1 TCF25  
SUMO2 MAF1  
RAF1 YWHAE  
MAP2K4 MAPK10  
CDK1 MAPT  
IL6ST CDK9  
DRD1 HRH3  
NGFRAP1 TSC1  
CDH15 GNA12  
RAB3A SYTL4  
KAT2A TRRAP  
MAP2K4 MAPK12  
ACVR2A TGFBR3  
ATG12 EIF3E  
GLA OTUD4  
PLCG2 TEC  
TP53 TOP2A  
TP53 TOP1  
ELAVL3 MAST1  
UBE2K LRSAM1  
ITSN1 WBP11  
GLRX3 NADK  
SRC SHANK2  
TGOLN2 GRB2  
BMP2R2 PRKG1  
MICAL3 RAB1B  
TPST2 CCR1  
AKAP13 MKNK1  
ITGB1 CD46  
BDNF MBTPS1  
PPP2R1A GNA12

TRIP10 SBK1  
BCL2 PXN  
ENO2 TUBA4A  
EWSR1 MRPS18B  
SMARCD2 CHD7  
TBK1 IKBKG  
RBM10 PTBP2  
HIST1H1E NCK1  
PRPF40A AKAP8L  
RIPK2 BCL10  
CD40LG RPS27A  
SYN1 PRKACA  
SUMO4 DNAJB11  
PF4 CXCR3  
KCNJ11 AP2M1  
GRIN2C INADL  
TES ACTL7A  
PRPF40A SFPQ  
RBBP5 CXXC1  
RPS27A SKP2  
TIMP2 ECHS1  
SRC GAB2  
MCC CAPZA1  
CDC25C RPF1  
GATA1 MAPK1  
SPTBN1 SMAD4  
ETHE1 IGSF21  
STAT5B PPP2CA  
AKAP5 DLG1  
GTF2B REL  
TGFB1I1 PTK2  
TP73 LRPPRC  
ABL1 CDC27  
MYC NFYC  
SQSTM1 MRPL38  
HCFC1 RBBP5  
RELB NONO  
ATF7 RASA1  
UBE2D3 POLL  
NTRK2 TRAF6

UBC WRN  
TAF10 TAF2  
CLTC EPN1  
PPP1R8 CDC5L  
PHC2 LMO3  
GRB2 SF3B4  
GRB2 SAFB  
CDH1 GNA12  
MAPK14 MAPKAPK3  
ACTA1 COTL1  
IGSF21 BTBD2  
FXR2 THAP1  
HDAC1 SATB2  
UFD1L VCPIP1  
NFYA TAF12  
SRC TYRO3  
MEN1 HCFC1  
GRM5 PRKCZ  
CRYBB2 CRYGC  
PAK2 SNX9  
GRB2 RPS6KA1  
EPCAMLCN1  
USP11 OSBPL10  
LCP1 GCA  
CDC25A MAP3K5  
TRAF2 FAM120B  
EIF3B SRRM2  
GNB2L1 PRKD1  
PPARA NCOA1  
USO1 IKBKG  
ELANE CXCR4  
CTNNA1 ZGPAT  
ARPC2 ARPC5  
PRKAG1 PRKAG2  
RTCD1 RPL36  
PARP1 NCAPD2  
KLK3 SEMG2  
PRPF4 SRSF1  
HSD11B2 HDAC1  
GNB2L1 PLEC

COMMD1 COMMD8  
AR SMAD4  
MCC ACOT13  
SERPINC1 PLCG1  
MYC CD52  
MAP3K12 MAPK8IP1  
DRD1 COPG  
DVL2 C9ORF100  
MAPK9 USF2  
CTSG LRP1  
XRN1 SPATA20  
NCK1 CELSR2  
RHOA ARHGAP8  
SRCAP CARM1  
ENTPD6 ATXN1  
ABL1 ABL2  
NCK1 NPVF  
UBTF RUNX2  
TFE3 VCP  
XRN1 UPF3B  
OGT BAP1  
NCOR1 BAG1  
SMAD7 SMURF1  
YWHAG DDX27  
OXTR ARRB2  
PSG2 SMAD4  
PRKDC SGOL1  
GRB2 SHB  
NPM1 PA2G4  
DRAP1 SMAD2  
NCOR1 PPARG  
CHD4 BCL11B  
TNFRSF1B MAD2L1  
ACTA1 PRKCE  
MS4A1 CSNK2A2  
RAB40C FBXL15  
MAPK8IP2 MAPK8IP3  
DTNB TRAF2  
TBP RRN3  
FOS KCNH4

PPP1CACASC5  
STAU1 UPF1  
VCAN CD44  
EGFR SEC13  
ARHGEF1 CNKSR1  
POU3F4HNRNPU  
DSPP CASP2  
TFAM IKBKE  
EPOR GAB2  
SIN3A DDX20  
MAP2K7 KIF26A  
ERBB2 CHN1  
SKIL CAMSAP1  
CBLN3 CBLN2  
POLR3A POLR3H  
MYBL2 SND1  
MCM10 ORC3  
PABPC1 PAIP2B  
RPA2 C7ORF64  
TFCP2 SERINC1  
AKT1 FOXO1  
HSPA1L REL  
PRKACA MEP1B  
ATM WRN  
INSR PLCG1  
YES1 GP6  
IKBKE RBBP7  
ASAP2 FYN  
HSP90AA1 MCF2  
GYG1 GYS1  
HDAC3 SAP30L  
AIMP2 FUBP1  
SNRNP200 SMAD2  
LZTS2 ZNF581  
TJP1 KIRREL  
SMARCA5 SMC1A  
SERPINE1 UBQLN4  
HAP1 KAT5  
TPD52L1 MAP3K5  
WEE1 SMURF1

ANXA3 REG3A  
POLR1A USP11  
TMBIM6 TRAF6  
USP11 ATAD3B  
USP47 FBXW11  
MMP1 TFPI  
LHCGR GIPC1  
GLP2R CALM2  
CPSF6 UBQLN4  
UBE2N MID2  
NPY PMCH  
FGR CYP27B1  
SMAD1 LEF1  
SMAD3 MYO5B  
MCF2 STUB1  
IKBKE RAB5A  
SMEK2 FEZ1  
RAF1 RCAN1  
VIL1 TEX11  
RUNX2 SMAD1  
RUNX2 SMAD2  
GABARAPL2 TBC1D2B  
NCK1 TRIM39  
ARHGDIB CASP7  
EPM2A GYS1  
SERPINB8 CAPI  
SMARCB1 HDAC1  
TMEM11 SCMHI  
FYCO1 MAP1LC3B  
STX2 SYT4  
SF3B1 SF3B5  
ORC4 MCM6  
FYN DOK3  
SUMO1 RAD51  
UBE2D1 RNF126  
TK2 APLP1  
KIAA0182 NUDT18  
CYBA NCF4  
MBL2 MASP1  
SNAP23KIF5B

CA12 TOE1  
H2AFJ HSPA4  
VCP AMFR  
IGHM CD22  
CLTC IKBKG  
TGFB2 SMAD3  
PFKL TAB2  
TLE1 HIPK2  
PFN2 FAM173A  
SNAP91PLCG1  
PRKCA PRKCE  
OMG RTN4RL1  
ANXA6 CR2  
CDK9 MRPS27  
HLTF PHLDA3  
IKBKE UGGT1  
EEF1A1MDM2  
CTPS YWHAB  
MDH1 MPP3  
USP11 MAP1LC3C  
MED14 CYP27B1  
RPS27AORC1  
CDK5RAP1 EXOSC3  
CDK5RAP1 EXOSC5  
RAD23A EWSR1  
XRCC1 CSNK2A1  
WAS PACSIN2  
NOTCH1 REL  
SUMO1DCPS  
OGT THAP1  
PRKCB LMNB1  
USP2 BEGAIN  
GABPB2 LMO3  
PRKCSH GABARAPL2  
FOS PPIG  
SIN3A DACH1  
PRDX2 SUMO4  
HNRNPA2B1 DHX9  
HAND1 TCF3  
SGK1 PIP

MED22 MED25  
SMC1A NUMA1  
SNAPC1 SNAPC3  
NR3C1 CD3D  
MAGEA4 ZBTB17  
PSMA7 CUL1  
HIRA HIST1H2BD  
MAP1B AMBRA1  
CUL4A TSC22D1  
TAF6 NFYC  
CHD4 IKZF2  
CHD4 IKZF3  
MED14 GATA1  
TF GRB2  
GLI1 STK36  
EWSR1 STK24  
PTGS2 CUL1  
DDRGK1 CDK5RAP3  
F10 F3  
PTGS2 CUL4A  
PDGFRB PIK3R1  
ABL1 YAP1  
PPP1CA PPP1R13L  
TRIP4 NCOA1  
ATN1 IRF9  
PIM1 CBX3  
TLE2 DDB1  
NTN1 DCC  
MNDA RBL2  
TCERG1 GRB2  
MSX2 POU2AF1  
EIF3F EIF1B  
TNFSF18 TNFRSF18  
PCDH7 PPP1CA  
ITK LCP2  
YLPM1 PPP1CA  
PIK3R1 WAS  
HSPA1L NFKB2  
BIN1 AP2A1  
PXN NEDD9



NDC80 ZWINT  
HDAC3 NCOR1  
CDC25A RPS27A  
CASR VCP  
RBL1 RBBP8  
LST1 PRKCB  
NCK1 SNX8  
ERBB2 HDAC6  
FGD1 CTTN  
NCOR1 DAXX  
MMP10 BCAN  
MCM4 MCM2  
UBTF FBL  
AXIN1 TSC1  
PPFIA2 PPP2CA  
UBXN1 ACVR1  
SMPD1 NGFRAP1  
GABPA KEAP1  
HIST1H3J SETD2  
SFN TRIM25  
PIN1 SRRM1  
ACTN2 NRIP1  
ESR2 MED12  
KAT2A TAF9  
MED12 MED18  
EIF3H HLA-B  
PLCB3 PARD3  
EPOR PTPRJ  
NCK1 GPR45  
PTOV1 TMCC2  
GOLGA2 GORASP2  
IL6 IL6ST  
NUDT21 EXOSC6  
SRC MAPK8IP3  
CDC14A BRAP  
ATM DCLRE1A  
PSMD7 PAAF1  
GMNN MYST2  
NUDT21 C7ORF64  
CALM2 CALD1

CUL3 GAN  
MED24 MED19  
CDC5L AKAP9  
SERPING1 ELANE  
ERH SETDB1  
ASAP2 REPS2  
CASR RNF19A  
RPS27A TNNC1  
SKI TRIM28  
FXYD1 DMPK  
RAF1 CDC25A  
XRCC5 HDLBP  
SET IKBKE  
STK16 MKKS  
RAF1 CDC25B  
PTK2 AEBP1  
F8 LRP1  
PML RELA  
MTMR9MTMR6  
CSNK1A1 SLC18A2  
MTMR9MTMR7  
MAP3K10 RP5-862P8.2  
CASP8 CASP10  
YWHAZ NFATC4  
NGFR SHC1  
THRA RXRB  
MYCBPAP CDK19  
PRMT5 DNMT3A  
WAS SNX33  
ATP1A1 PRKCA  
CDC42 CSPG4  
FGF6 FGFR1  
MAPK8IP2 MAPK8IP1  
PPIA ITK  
SOCS3 CSF1R  
ID1 GATA4  
MYH7 TEAD3  
RNF166 UBE2D4  
RPF1 ARRB1  
ETS1 BRCA1

MUT MAAA  
CD5 HNRNPU  
WEE1 NEK6  
PAICS FTSJ1  
PCMT1 TNIK  
SMARCB1 MED21  
NFKBIA COMMD1  
FAM58A LIPE  
JUP PKD1  
APP PDIA3  
EPHB2 ALK  
SPATA2L CYLD  
EZR AHNAK  
AKT1 ACTA1  
PACSIN1 ASAP1  
USO1 SCFD1  
HNRPDL RAPGEF2  
DCX AP2M1  
PDK1 SGK3  
ABCD4 TMEM66  
FGFR2 YWHAZ  
DSPP DSC1  
DPYS DPYSL5  
SYNE1 DISC1  
CRK THOC2  
CALM2 ACE2  
UCP3 YWHAG  
SFXN1 UBA5  
CDX4 HOXA5  
PHF14 PCBD2  
FYN MEPE  
GLYAT VOPPI  
RAD23A UBL7  
IPO13 PAX6  
OGG1 SNRPF  
MYL6 EWSR1  
SYNJ1 FNBP4  
GLUD1 HIST1H2BJ  
SUMO2 NOL9  
GFI1B NELF

FGFR3 RPL8  
MAX KAT2A  
FN1 TGM2  
EFEMP2 CCND3  
RPL31 EWSR1  
HOXD9 PBX1  
SRC FAS  
CDK1 SPAG5  
MED6 MED1  
SIN3A SAP130  
NFKBIA CDC34  
POLR3A IKBKG  
ATXN1 EIF4ENIF1  
ESR1 MED20  
USP11 PGAM5  
KNG1 KLKB1  
PRKCB IKBKG  
AR RAN  
CRK GABBR1  
RANBP2 MVP  
FSCN1 TRAF6  
KNG1 F11  
PA2G4 TRAF6  
CALM2 MRPL20  
SDCBP RNF11  
UBE2E1 RMND5B  
MED24 SMAD2  
MED24 SMAD1  
BMI1 KIAA1377  
POLR2H MED10  
MAP2 MARK4  
RALYL LMO3  
COL4A1 NID1  
VDAC1 GSTK1  
RNF10 UTP14A  
MDM2 KAT5  
RELA MED15  
RXRA SMAP2  
TXNIP ZBTB32  
RXRA SNW1

DYNC1H1 DYNLRB1  
JUB AURKAIP1  
FYN ITPR1  
AHSA1 STK24  
CSNK1E MDM2  
PTP4A3 ATP1B3  
HSP90B1 LRP1  
MSN PRKCQ  
RXRA TDG  
PLSCR1SPG7  
GSK3B DHX36  
AIRE RUVBL2  
THBS1 LRP1  
ITGB4 ATXN1  
RPF1 SMAD5  
GNRH1 GNRHR  
UBE2L3 XIAP  
CDC42 FHOD1  
SYVN1 DERL1  
PIAS1 MX1  
RAF1 JAK1  
NRP1 SEMA3B  
SSRP1 POLR3E  
NFIC CREBBP  
GOLGA2 TUBGCP4  
HSPA9 IKBKG  
CDC42 PPP3CA  
SPINT1 UBQLN4  
CRMP1 NAT9  
ORC4 ORC2  
PPIP5K1 CYLD  
MC2R MRAP2  
ORC4 ORC1  
CCL21 UBQLN4  
GTF2F2 C3ORF63  
NCAM2MYB  
TRAF3IP1 TRAK1  
VASP PRKG1  
PRKAR2A PALM2  
RPF1 LITAF

DARC CCL17  
SRC TNS3  
FSCN1 RAPGEF2  
SYT1 PPARG  
KCNH2 KCNE2  
NDUFA7 MDFI  
BUB3 PARP1  
DYNLL1 PKIB  
FYN CD79A  
NPPB NPR2  
LMO4 TINAGL1  
FRK RAC1  
NUP160EXOSC1  
RBL2 EZH2  
GH1 EIF2S3  
NPM1 EP300  
DPEP3 TRIM27  
CABYR GSK3B  
CCT3 RFWD2  
CREBBP MYST3  
ADAMTS4 BCAN  
CPSF6 GIN1  
WDR5 CXXC1  
TUBGCP2 NFKB2  
SCAND1 ZNF167  
RPL23 MAP3K14  
NBN MSH2  
SFPQ PSPC1  
NFKBIA ARRB1  
GRINL1A HIGD1B  
GATA4 HAND2  
MRPS18B EWSR1  
CEP63 SMC3  
CD5 LCK  
HP HBB  
BYSL MAP3K14  
TRAF2 TRIM31  
ACTG1 DISC1  
DNMT1 RPS27A  
HIPK2 BTRC

RARA NR1H2  
PTN HSPBAP1  
PTPRC CD22  
VHL MOBKL3  
RAP1A RAPGEF6  
ATXN1 PUM1  
APOL1 APOA1  
APLP1 CRCT1  
GMFB MAPK14  
NFKBIA ZNF182  
MLLT4 RALGDS  
MYST2 KIAA1377  
RB1 CASP10  
RND3 ROCK1  
FOS SMAD3  
PSEN1 CASP7  
PSEN1 CASP6  
XPO1 SET  
ITGB1 TGM2  
UBE2D3 TRIM26  
CDC42 CDC42BPB  
STAT6 CREBBP  
AR RUNX1  
CD5 FYN  
PSEN1 KCNIP4  
PPP2CAPPFIA1  
SUMO1 SMAD4  
AKAP9 DAXX  
S100B S100A1  
ILK DDB1  
HABP4 TOPORS  
YWHAQ KIF5B  
PPP1R2 CSNK2A1  
CCDC33 NINL  
NRP1 SEMA3F  
TMEM11 PHLDA3  
SNCG DYNLL1  
CDC16 CREBBP  
CDC20 MAML3  
PANX1 P2RX7

EMX1 TP63  
ARCN1 PHLDA3  
HDAC3 EED  
NRAS PLCE1  
TXN TRAF6  
SFPQ SREK1  
ERCC3 SMAD2  
MDM2 COPS5  
AMOT NEDD4L  
INSR PTPRC  
PTPRG CSK  
RB1 KAT2B  
NOTCH1 RELA  
RPF1 PDCD6IP  
HMGB2CSNK1A1  
HRAS SHOC2  
UBQLN4 ELF5  
NCOR1 TBL1XR1  
STMN3 TRPC5  
COL5A2 PCP2  
YWHAZ PCM1  
DAB2IPMAP3K5  
SERPINB9 C14ORF1  
SPTBN1 ZNF512B  
SNRPD2 GEMIN7  
PLCG1 VAV3  
BRMS1L BRMS1  
NUMB DPYSL2  
HSP90AB1 EEF2  
SRSF5 SRRM1  
TRIM21YWHAG  
COL7A1 CBF3  
SERPINB9 ZHX1  
LRRC3B SIN3A  
HCK DNM2  
AKT1 ILK  
PRKCB RB1  
ARRB1 STK38  
MLH1 AMOT  
RHOQ CDC42BPA



APEH MCC  
GRB2 FAM59B  
IKBKE MRPL32  
ATRX ZNF512B  
UBE2D1 MAP3K1  
UBAP2 G3BP2  
FLOT1 TOLLIP  
HDAC3 SF3B1  
FYN RTN4  
ABLIM1 TRAF2  
PCDHB5 DGKB  
CDH1 ITGA6  
VDAC1 CASP4  
EPB41 TRMT112  
IMPDH2 TNIK  
ATRX HDAC1  
AR CALR  
RANBP2 SPTBN5  
PARP1 CASP3  
MTA2 MTA1  
DSC2 PKP2  
AR PATZ1  
PIK3R1 IL1R1  
FAM160A2 REEP6  
TLE1 AES  
NF2 RPS27A  
LRP6 APOB  
BDKRB2 ADRBK2  
TNNI2 CALM2  
HSPA1B FANCC  
TP53 MAPK1  
MLLT4 NRXN1  
SOD2 PRDM2  
SF1 ITCH  
PSMD4 NAP1L1  
DLG4 FZD2  
HNRPDL TRAF6  
SOS1 EPS8L2  
CD4 CD82  
DSTN RRBP1

HGS DECR1  
KIAA0182 RCOR3  
TP53 ZMIZ2  
ING3 TRRAP  
NCOR1 MECP2  
MDM4 RB1  
TP73 AGLB2  
PAPOLA SIRT1  
SASH1 SKIL  
PLCG1 DDR1  
HBP1 ADRM1  
SOCS2 EPOR  
GTF2H1 ZSCAN1  
CAPRIN1 PRMT1  
SIN3A INGX  
APOD LEPR  
MDFI CHIC2  
RDX CPNE2  
EWSR1 MNS1  
CALM2 TRPV6  
RPA1 FANCM  
ACTB RAB35  
DPP4 CPAMD8  
PRKACA IQGAP1  
RAF1 PRKCA  
C1ORF124 RNF11  
AKT1 GRB10  
TP53 NMT1  
MAP3K8 RUVBL1  
UBC YWHAZ  
TGFB1 KATNB1  
TNF2 POT1  
GADD45G TSNAX  
DDX5 TBP  
CSK YTHDC1  
STX1A VPS18  
YWHAZ STK38  
USP14 PSMD6  
NKX3-2SMAD1  
APEH HLA-B

CSNK2A1 MAF1  
STRN4 STK24  
CCNB1 TSPYL2  
TF IGFBP2  
GRM1 GRASP  
PRKCB CDK1  
TCP1 PPP2R2C  
ROCK1 GAB1  
ABHD16A PTGS2  
SGTA F11R  
CSNK2A2 STX1A  
KCTD13 USP25  
RAB5A USP6NL  
LSM3 LSM7  
NCOA6 PAXIP1  
NCOR1 SMARCA4  
SDCBP SLC6A5  
RAC1 UBQLNL  
BCL2 PRKCA  
SMG1 UPF2  
FANCA MX1  
PLAU NID1  
MSH2 IKBKG  
POLR2B MED10  
HMGA2SMAD9  
EXOC3 MLH1  
BFAR UBE2D4  
CEBPD EP300  
GTPBP3 PARP11  
BARD1 ING5  
IRAK1 IRF7  
MED28 MED11  
MAP3K8 KSR2  
GRB2 BCL2A1  
PDZD2 ERBB2IP  
PRKCD NCF4  
PSEN2 RHEB  
RPA1 MUTYH  
MSN FASLG  
ILK DHCR7

TCP1 RFWD2  
UBE2D2 ZNRF4  
PYGL SMAD3  
NRAS SRI  
DLG4 GPRIN1  
GDF9 GADD45G  
SFPQ SRRM1  
TUBB TBK1  
NRIP1 KPNB1  
LDB2 SSBP3  
RPF1 UBE2E1  
WEE1 BRSK1  
GRB2 TAL2  
MSN BCAP31  
RRN3 EIF3L  
BMI1 UBE2I  
RARA KDM5A  
SSR4 TMBIM4  
UBC YWHAB  
RFX3 RFX4  
ITGB1 CD9  
ATXN1 SAR1A  
PIK3R1 TUB  
PBX2 MLKL  
AKT1 PDE3B  
CPSF7 WWOX  
ESR1 GTF2H1  
UBE2N STUB1  
FABP4 USP15  
MYB SND1  
PEBP1 MAP3K14  
KCNIP2KCND2  
PLEKHA7 USP20  
ESR2 DDX17  
RANBP2 SUMO2  
FASLG SAMSN1  
PTK2 NEDD9  
TG LRP2  
GABRB2 PPP3CA  
IGF1 IGFBP2

PTP4A3 MMS19  
CAMKK2 FANCI  
MTA1 RBBP7  
ACVR2A INHBC  
F2 GGCX  
PLD2 GAPDH  
RBX1 DIO2  
GTF3C1KLF6  
MAPK1 DAPK1  
TNNT1 SMURF2  
CPSF1 COPS5  
PROC SERPINA5  
SNRPB WDR77  
CEBPE MED16  
GRB2 JUB  
CHMP1B CNOT10  
GRB2 MAPK14  
CHGB FGFR3  
GH1 DSG1  
EMD HNRNPU  
VEPH1 GSTK1  
RTN3 RTN4  
ATP1A1 FXYD7  
TSC22D1 TSC22D4  
CST3 CTSS  
AKAP8 RELA  
FSCN1 PRKAB1  
SNCA PRKCE  
HSPA5 CASP7  
COL4A1 COL16A1  
MTHFD1 TNFRSF10D  
GADD45A MAPK14  
CD44 CD9  
BCL2 ITPR1  
IQGAP1MAP3K3  
PRPF40A SERPINB9  
UBE2E1 RNF111  
UCHL3 USP20  
IQGAP1TNFRSF10D  
SF3A2 SAP30BP

RXRA TMPRSS3  
MX1 TRPC1  
GTF2F2 TBP  
FAS SUMO1  
PRKCA GFPT1  
MDFI LRRN1  
ITGB5 LTBP1  
CUX1 EHMT2  
SERPINA1 MMP26  
AVP AVPR1A  
ILK SMC4  
CHEK1 RB1  
PGAP3 HIF1A  
SIP1 SNRNP70  
TXNDC9 PTN  
ZNF367 SIRT2  
ADRB1 GPRASP2  
WIPF1 CTTN  
DPEP3 GATAD2A  
CDK5RAP2 C14ORF1  
S100A11 VHL  
KRT10 AKT1  
PLCG1 ASAP1  
LRP6 DKK1  
TCERG1 HSPA5  
GADD45G PLEKHM1  
GPRIN1 SYNGAP1  
PSMC2 TRAF6  
CLTC NFKB2  
GFI1B BRE  
HNRNPK PCBP1  
KCNA2 KCNA5  
HNRNPK PCBP2  
NMU NMUR1  
IRAK1 COPS5  
STAT1 MAPK8IP3  
PSMB9 POMP  
IQGAP1 PPARGC1A  
PCNA RUVBL2  
USP2 TRAF2

CD79A BLNK  
KRT18 KRT5  
TRIM37NGFR  
CENPJ GF11B  
SMAD1 CREBBP  
CD5 PIK3C3  
KCNA2 KCNA4  
KCNIP2KCNIP1  
NEFM MAP3K12  
C2ORF18 PSMG2  
BMP2 BMPR1A  
RHOA CASP8  
UBE2D2 MKRN3  
HP APOA1  
HP APOE  
RBP1 SIRT1  
EP300 HIST2H2BE  
USP11 RAE1  
STRN CCT2  
MDM2 FBXW11  
DDX6 YWHAQ  
MCM7 TH1L  
SNAP23STX2  
CTSL1 GEM  
CBX3 SRRM1  
TLK2 FEZ1  
HSP90AA1 FKBP5  
PCNA POLQ  
POLA2 ULK2  
NPY MC4R  
YWHAZ GABBR1  
KHSRP TRAF6  
SS18L1 SMARCA4  
PRRC2A ATN1  
CDC34 BTRC  
BRCA1 TP53BP1  
VPS16 VPS18  
PRRC2A ATXN1  
NLRP1 NOD1  
NGF SORCS3

CTSO FGFR3  
UBE2L6 RNF144A  
MYST2 RERE  
TLR4 NOX4  
EIF4G1 USP10  
TGFBFR1 SMURF2  
SREK1 SUPT16H  
GH1 PSMC2  
DLGAP3 SRC  
NR0B2 KLF6  
EMD FYCO1  
WBP2 ITCH  
NFKBIE RELB  
XPA ATR  
SRC PTPN1  
YES1 TRPV4  
MAPRE2 MAPRE3  
G3BP1 WDR36  
FGF5 FGFR4  
ETS2 SPI1  
BMX ITK  
IRS1 RPTOR  
SSTR2 SHANK1  
CDH1 IRS1  
TLL1 CHR1  
ARCNI COPG  
CREBBP NEUROG1  
RPS27A GGA1  
AIMP2 LMO3  
FGFR1 SHC1  
NR2F1 GTF2B  
EEF1D ASCC2  
GRK4 CALM2  
TUBA4A STARD13  
RPS27A SIM2  
ABL1 KIT  
TP53 CDKN1A  
HLA-DRA PRPF40B  
CD79A PTPN6  
SNRNP200 RNPS1



MAX ARHGEF2  
IKBKAP MAP3K14  
SYCP2 EHHADH  
AHCY HLA-B  
SUMO1 SP3  
AMPH NECAP1  
SNRPD1 DDX20  
MAP2K3 MAP3K4  
LSM3 EEF1A1  
BRCA1 UBE2I  
MAP4K4 SSRP1  
MED9 MED11  
OXCT1 TFCP2  
GABARAP NSF  
PML DAXX  
FLNA SREBF2  
KIF5C SNAPIN  
TRIO APC  
GEMIN4 RNPS1  
ILK ATXN10  
COX4I1 TMBIM4  
EPHA2 TNFAIP1  
MED24 MED1  
VPS16 UVRAG  
TGFB1 YWHAZ  
PRDX3 RPS6KC1  
HDAC1 WHSC1  
KCNJ1 PRKCD  
EDN1 MME  
RBFOX2 DEDD2  
TEAD1 VGLL4  
EXOC2 EXOC7  
TTR VIM  
EPB41 PFN2  
CBX4 CBX8  
MRE11A NEK1  
SYK SH3BP2  
PAX9 NR0B2  
SIAH2 TRAF2  
UBE2K CBLC

MDFI APLN  
GEMIN4 BRF2  
CCR1 CCL8  
BIRC2 MAP3K14  
MLLT6 DOT1L  
S100A8 C14ORF1  
TPT1 PLK1  
EBAG9 SNAPIN  
LAMA5 MYOC  
RPA1 POLL  
S100A4 MYH9  
SMAD7 SOX7  
RELA SIN3A  
EDF1 FOS  
HADHBMAP1LC3A  
WIZ CDYL  
PPP2CASTRN3  
BUB1B CENPE  
VHL KIAA1967  
ANXA2 PAK2  
ARG1 NOS1  
BACE1 GGA2  
EIF3B UPF2  
PAX6 SOX10  
BDKRB2 PTPN11  
TXN PRDX2  
S100A4 MYH10  
RHOQ CDC42EP3  
MET CNR1  
EGLN3 HIF3A  
CDC34 ATF5  
HSPA2 EWSR1  
PLCG2 LCP2  
RANBP2 KIAA0100  
FCHSD2 MSL1  
MDFI TINAGL1  
TGFB1 PPP2R2A  
CCR1 CCL7  
JUP RIBC2  
BLM TERF1

TSPYL4NINL  
PPP1R15A PPP1R1A  
RAD51 MCPH1  
CDC42 MAP3K4  
LDB2 SSBP4  
GTF2E1 GTF2E2  
PLSCR1 MED15  
CAPZA1 TWF2  
CTLA4 STAT5B  
OTUD4 MYCBP  
PIK3CG GRB2  
STIP1 HSPA4  
IKBKB PRKCB  
PFKFB2 YWHAQ  
MAX COPS5  
PSMA3 PSMB5  
RORA ZXDC  
RB1 SNAPC3  
SRC CD59  
FOXO1 RFX2  
KRT4 USPL1  
PPARA PPARGC1A  
AP3B1 CSNK1A1  
EGFR CCDC50  
PCM1 CCDC53  
CDC42 WASF2  
RAN NELF  
ABI1 WASF2  
PRKCA MARCKS  
SCNN1B ANK3  
CETN1 USP49  
SAP30 INGX  
C15ORF29 HAP1  
RAMP3 CALCRL  
P2RX6 CDH5  
SIK1 VAPA  
PFN1 DLG5  
YWHAZ DHX9  
TGFB2 LTBP3  
GRB2 FUBP3

EYA1 DACH1  
ARNT CSNK2A1  
TNNT1 SMURF1  
RXRG CREBBP  
CBX3 YAF2  
CHD4 RBBP7  
GSPT1 ETF1  
PDPK1 RPS6KB2  
EIF3J EIF4G1  
PSMD14 PSMD4  
IKBKE TMEM173  
FGF2 CEP57  
POLR2B ZSCAN1  
NPM1 MCC  
YWHAZ RNPS1  
ATXN1 PHPT1  
RPL38 MEPCE  
SIAH1 UBE2D4  
PAX2 PAXIP1  
NCOA6 NUMA1  
ZBTB33WDR48  
CASP7 MEF2D  
GRB2 EP300  
CRMP1 KLHL20  
APOD GRINL1A  
FYN SPHK2  
NSL1 MIS12  
CRKL ANK3  
TRRAP TELO2  
STRN4 AK5  
CDK1 RPS6KB1  
PRKCI YWHAH  
CHD4 TAF9  
PSMB5 ABCB5  
AMOT MAGI1  
SRC ADRB3  
ARPC3 LTA4H  
USP49 HUWE1  
STAT1 RAC1  
FGFR4 RPS27A

UNC13B STX1A  
ADRB2 NOS1  
ERH CTDP1  
MEIS1 PBX1  
TBC1D15 MAP1LC3C  
HAVCR1 UBQLN4  
RB1 BRF1  
COLEC11 YWHAG  
NPM1 EIF4B  
MEIS1 PBX3  
PKN1 MAPK14  
PAX6 DLG1  
CDK5RAP3 UFC1  
CD19 CD9  
CEBPB NRF1  
RARA NFE2L2  
MAPK3 SYK  
DZIP3 UBE2W  
LIMK1 LIMK2  
HLA-A PDIA3  
PRMT2 PPARA  
STAU1 CDC42  
HOXC9 HOXD1  
CDK1 UIMC1  
FYN NEDD9  
CREB1 TRIM22  
MRPS28 USP42  
TDP2 TNFRSF1B  
WDR33 ZHX1  
ZBTB8B AP1M1  
RPS11 RUVBL2  
BCAP31 TNIK  
CDKN1B RPS6KA1  
AR GADD45GIP1  
ERBB2 PTPN3  
TRIM9 BTRC  
MCM10DPPA2  
NFKBIA ELP3  
RIPK2 PHB2  
PPP1CCRYR2

PPP3CB CABIN1  
MED1 MED17  
EIF3D EIF3A  
MAPK13 AKIP1  
UBA1 SEMA3F  
ARHGEF2 CGN  
WASL HSP90AB1  
LCK CD44  
BIK BCL2L2  
SNAP91 TRAF3IP1  
UBE2I FLNC  
HNRNPD IGF2BP2  
APBA2 CLSTN3  
SMAD9 CEP135  
SUMO1 TDG  
TFE3 EIF3A  
TNFRSF10B MAPK8  
TPM3 ACTB  
FGFR1 SOS1  
LDB2 RILP  
PA2G4 PRKAB1  
EIF3D IKBKE  
RGS16 SRC  
SMURF2 AIMP1  
MYO10 TWIST1  
MBTPS1 HDAC2  
GNG7 MPP3  
ZNF174 ZNF434  
SIAH2 RBBP8  
CEP55 VPS37D  
PTK2 CAPRIN1  
ATN1 USP54  
FLRT2 GRB2  
SYN1 NOS1  
SMAD2 MYOCD  
FAM175A RBBP8  
UBC RAC1  
TALDO1 TRAF6  
NCAPH NCAPG  
CD5 DYNLT3

INPP5F FAM109A  
HSP90AB1 STAT1  
SMAD1 KAT2A  
SMAD1 KAT2B  
CIAO1 MRPL24  
GADD45A HIST3H3  
SEPT7 ANLN  
PTK2 GRB7  
FSCN1 DNAJB9  
TSC22D1 LAS1L  
ELK3 CTBP1  
FLNA BRCA2  
ATP5B PSMD4  
FKBP4 LOXHD1  
IRF2 STAT1  
TBL1X SIN3A  
GABRG2 PPP3CA  
FGF2 RPS19  
CNTFR IL6ST  
HIVEP2 SUMO1  
PRKD1 MARK2  
VAMP1 BCAP31  
CALM2 KIAA1683  
EP300 HIST3H3  
DLEU1 COPS6  
UBTF TAF1  
YWHAG ERC1  
NDEL1 TACC3  
ZNF512B CREBZF  
ZNF512B DROSHA  
CCNA2 CHAF1A  
SLC9A3R1 CAPN6  
MED1 MED9  
SMARCC2 TSG101  
FYN TULP4  
CSNK2A2 PPP1R1B  
RET PRKAR2A  
JAK3 ALK  
ESR1 PTPN1  
MCM2 SNF8

RAC1 SH3RF1  
MET PLCG1  
HMGB1H3F3B  
TP53 CDC25C  
TTR PHYHIP  
HIVEP2 YWHAZ  
MCM3AP CRMP1  
NFKB2 FBXW11  
AP1G2 AFTPH  
ESR1 SMYD3  
DNAJA1 TRAF1  
PPP1CAKIAA1949  
GAB1 ARHGAP32  
RBP1 LRP2  
KRT15 NIF3L1  
TPST1 SELPLG  
RBBP6 ZBTB38  
MYCN GSK3B  
AKT2 GSK3B  
IQGAP1TSG101  
GPC3 WNT7B  
STRN ZRANB1  
FAM98B PRKAB1  
SRRM1 ASH2L  
SNF8 NIF3L1  
AR RNASEL  
APOB HSPA1B  
SGTA SERP1  
PRKACA CDK16  
PIAS1 NR5A1  
FAS BID  
CDK14 YWHAE  
FN1 GALNT6  
UBE2B UNC119  
ATXN1 UBQLN4  
GRB2 MOG  
HDAC2 HIF1AN  
HSP90AB1 TCP1  
UQCRC2 UQCRC1  
FLNC USP53



SCNN1B CNTN1  
TGIF1 MKKS  
PGAP3 CRY1  
MPP1 AMOTL2  
RPS27AJDP2  
CYB5A CYP17A1  
ASS1 YWHAZ  
MSH6 EP300  
TBX4 FAM46A  
COPB2 PRKAB1  
GNA15 GRM4  
CEBPB TAF9  
ABL1 BRCA1  
C7ORF64 TAF9  
HNRNPC RBM41  
HRAS IL3  
BCL2L1CASP8  
SRSF3 SRRM1  
APOD GRINL1A  
CTBP1 HDAC9  
U2AF2 U2AF1  
CBR1 MCC  
TSC22D1 TELO2  
RPS27AHNRNPD  
TPD52 TPD52L3  
YWHAZ PCBP1  
PKN1 HDAC6  
PRPF40A DAAM1  
FES PTGES3  
PDPK1 PKN2  
GZMB CASP3  
ANXA1 DLG3  
SNRPB2 SF3A2  
PDPK1 PKN1  
MAP3K3 BCL7B  
PRPF40A ZFH3  
PLG SERPINB6  
SCNN1B RPS27A  
POR CYCS  
ITSN1 SNX5

CHD1 HMGA1  
PLEC SRRM2  
PRPF40A ZNF451  
RPL23 MAP3K3  
POLD1 ARF6  
MAPK1 NCOA3  
STAT1 IFNAR2  
EMD BCCIP  
RB1 CASP8  
NAP1L1 TRAF1  
IL7R STAT3  
TGFB1 TTPAL  
AXIN1 ANP32A  
SFN ANKS1A  
WASL NCK1  
BCL2 CASP8  
SNRPB GEMIN4  
FBXO41 DISC1  
KIF20A CDC14A  
UBE2N LRSAM1  
HSPA1B STIP1  
RPS27A KEAP1  
BAX TOMM20  
EP300 CTF1  
RELA TRIB3  
RAB10 MLPH  
ESR1 CALM2  
RHOH CNKSR1  
CARD11 IKBKG  
TF FNBP1  
HSPA1B YWHAB  
WISP2 IGF2  
NTRK1 RPF1  
INPPL1 EGFR  
DDX24 G3BP2  
CARM1 RABGAP1  
CDC42 ARFGEF1  
GGA3 RNF11  
ITGAV P2RY2  
SGK1 PABPC1

POLA2 AKTIP  
TCEB2 CUL5  
GPRASP1 MARK2  
LYN DLG4  
MEF2C HDAC9  
PSMA5 PSMD4  
AKT2 TSC2  
MTA1 HIF1A  
RNF17 UBE2U  
PSMC2 UCHL5  
INPPL1 ABL1  
MPO CCND1  
MCM6 SRRM2  
NPM1 NOP2  
STK11 CDC37  
APP APBA2  
GTF2B TAF9  
CSNK1D PSEN2  
ATP2A2 OPRD1  
C8ORF41 RUVBL1  
STX3 SYT4  
FAS UBE2I  
TMPO USP7  
MEPCE SF3B2  
EXOSC10 EIF3M  
GDI2 RAB9A  
CRK OPTC  
ARPC5 ARPC4  
HGS PTCD3  
EIF4A3 UPF1  
APRT IKBKE  
HSP90AA1 RIPK1  
SOX6 SUMO3  
XPOT RANBP2  
COL1A1 FGF7  
TRAF1 NONO  
MAP4 NR1I3  
AKAP17A RNPS1  
XPOT NUP153  
RPS27AIKBKE

UBE2L6 RNF216  
SYN1 SYN2  
PTPN1 CDH2  
PRPF40A UBQLN1  
MTMR9EMILIN1  
DOCK10 RHOJ  
HERC4 HERC6  
SMAD7 CXXC5  
CREBBP KAT2B  
CREBBP KAT2A  
MYC MMP10  
NFKB2 IKBKG  
RPS27A EIF3A  
GEM GMIP  
CHMP4C VPS4A  
FABP4 EXT2  
ITGB1 VCAM1  
ESR1 PGR  
GTF2F2 PFDN2  
JUP CDH2  
ACTN2 LRP12  
ETF1 PPP2CA  
WDR62 RALY  
IQGAP1KBTBD7  
CD247 TRAT1  
MDFI DNPEP  
CREBBP DDX17  
NKX2-1 WWTR1  
RPS27A DOCK1  
CDC42 EPN1  
NLGN1 NRXN1  
ESR1 PSMC5  
CXCR4 RPS27A  
UBE2D1 ZNRF4  
SH3GL1 SH2D4A  
IRAK1 TAB2  
RPL31 YWHAZ  
GRB2 DLGAP2  
SLC9A3R2 OTUD7B  
ZNF512B SMYD2

E2F1 UBXN1  
SMAD1 NEUROG1  
SLC24A1 CNGA1  
CDK5RAP3 PRKAB1  
ATXN1 SPEN  
CDK5RAP3 RPL36  
APOH CLEC4G  
TRAPPC3 GSG1  
EP300 HIF1A  
MON1B VPS18  
RAB11FIP3 RAB11A  
ARF1P1 ASAP1  
VAC14 PIKFYVE  
FAM123B FBXW11  
SNRPD2 STXBP2  
ACTG1 MAP3K3  
SMC2 GSTK1  
DLG4 KCNJ12  
FUBP3 QKI  
TRAF1 CASP10  
PPFIA3 PTPRF  
ZNF365 NDEL1  
KIF1C YWHAE  
RPS27A SH3GL2  
NCK2 LIMS1  
PAK2 ARHGEF6  
SMURF2 NEK6  
SNRNP200 IKBKE  
SMURF2 TNPO3  
EZH2 RPN2  
HNRNPA3 POLR1E  
COPS5 DCAF11  
MGEA5 MAST1  
XPO1 STAT1  
PRPF40A PIAS3  
COL4A1 SERPINE2  
TADA2A CTNNB1  
UIMC1 GLTSCR2  
PARP1 TERF2IP  
FLNA GRIK1

CASK RPH3A  
WDR37 EWSR1  
CHEK2 PPP2R5D  
TAF4 AHR  
SRRM1 DPY30  
AKT1 THOC4  
ADAM10 TGFA  
GTF2B TCEA2  
MAGEA11 RADIL  
PRPF40A WASF2  
TUBB MDM2  
FOS LMNA  
CTSG PARP1  
DLL1 NOV  
MAPKBP1 MAPK10  
PEBP1 PACSIN3  
LYN PRKDC  
RPL13 PIK3R1  
TGFR1 AP2B1  
AMOT SCLT1  
MMP1 BCAN  
PLCG2 CBLB  
CASP7 CASP8  
COPS6 COPS7B  
MYST4 ING5  
GTF2B TAF11  
PSMA4 PLK1  
GNAI1 GPSM1  
S100A1 AGER  
ERN1 COPS5  
CDK1 KIF11  
SRC MEPE  
PAX6 TRIM11  
ABL1 MAPT  
TRAF2 HSPBP1  
MDM2 CREBBP  
PCM1 TRIOBP  
HIST3H3 IPO4  
STAU1 TUBB  
ATF2 ATM

CARM1 UBE2D4  
PLCG1 SNX7  
KAT5 SIRT1  
VCAM1 IL13  
MAP1S RASSF5  
COL7A1 LAMB3  
UBE2D3 BTRC  
COL7A1 LAMC2  
FIP1L1 SRRM2  
POMC MEP1A  
ATP5A1 SIRT3  
PAK2 SEPT2  
INHBC ACVR2B  
PSEN2 KCNIP3  
FRS3 NTRK2  
STAT1 DUSP3  
CASP3 PSEN1  
MRPS21 USP42  
SGTA SPP1  
ARPC2 PRPF6  
CREBBP IRF7  
GAPDH POU2F2  
RARA COPS2  
SPG20 SMURF2  
RPS27ABAG1  
KCNA4 DLG3  
FEZ1 DISC1  
STX2 VAMP8  
BRCA1 SUMO1  
SF3B2 SMAD2  
EIF2AK2 TAB2  
BMP2 ACVR2B  
USP33 ROBO1  
ID2 TCF12  
MDM2 RYR2  
CTAGE5 TRAF6  
PSMD11 INSL6  
CTSL1 COL18A1  
CCK MEP1B  
SCTR CPAMD8

RALB RALBP1  
ARPC1B ACTB  
PIK3R1 CSDC2  
PCF11 THOC4  
VIP VIPR1  
CCK MEP1A  
TP53 RPL23  
EIF3F PRRC2A  
TGFBR1 BTBD2  
ATF1 BRCA1  
KRT1 PRKCE  
TP53 SAE1  
TRAF1 TANK  
FKBP4 SMURF2  
HTATSF1 ZNF512B  
GPAA1 GRIK5  
CREBBP KAT5  
CDC42 ATXN10  
ITGAM ICAM4  
NF2 AGAP2  
ZBTB9 CHURC1  
TAF6 SMARCC1  
DIAPH1GAS7  
TP53 CCL18  
SGCE ARIH2  
TLR3 TICAM1  
RHPN1 ROPN1  
NR5A1 NCOA1  
GADD45A HIST1H4I  
WASL ARPC1B  
XIAP NOD2  
PROP1 PITX2  
AGRP MC5R  
RXRA NCOA4  
AKT1 KTN1  
SKIL PYCR2  
EIF3J GOLM1  
RALA EXOC8  
ITGB2 RANBP9  
NBN RECQL5



TNFAIP3 TNIP2  
LDLR PDIA3  
BARD1 GIT1  
SRSF1 SRPK1  
TBK1 RUVBL2  
EEF2 MAX  
EWSR1 MAPK1IP1L  
MAP3K3 TUBB6  
SLC38A1 GNB2L1  
KIAA1715 CHMP1A  
HNRNPM LYST  
KRAS EPB42  
IRF5 IKBKE  
DLG4 LRRC1  
UBQLN4 UBQLN1  
JMJD5 PCYT2  
PFAS CCNA1  
USP12 NUP160  
OMA1 ITGB7  
CAD RELA  
PIK3CDIL4  
IRAK1 IRAK4  
E2F1 ARID4B  
GRB2 CLCA1  
CUL2 SAP130  
GRB2 APOL5  
CPLX1 RXRB  
PFAS HLA-B  
PRM1 LBR  
AIRE MCM5  
CCDC91 GGA1  
CCDC91 GGA2  
CNOT3 CNOT8  
MAPK9 KIAA1377  
KCNH1 KCNB1  
EPB41L2 YWHAG  
LAMA4INSL6  
PRRX1 MAFF  
STX3 VAMP8  
PPP1R12A FYN

UBE2D1 BARD1  
OSM COL4A4  
PSMC4 PSMD2  
MPG REXO2  
GRIA2 GRIK2  
DNTT DNTTIP2  
GNAO1 PTPRU  
KRAS PIK3CA  
TBL3 APPBP2  
DNAJA1 MAP3K1  
SF3A1 PRKAB1  
NLE1 EWSR1  
DLGAP3 DLG3  
BRF1 DTNBP1  
TP53 PPP2R1A  
SSRP1 CHMP1B  
TBK1 RUVBL1  
GRB2 NFE2L2  
ESR1 PGC  
SF3B2 SRRM2  
ADAM12 GRB2  
TGFB1 RGS19  
POU3F2EP300  
GABRR2 CSNK2A1  
F5 MMRN1  
BAG3 BCL2  
TLX3 HNRNPUL1  
CASK NRXN3  
SUMO2 EME1  
CALM2 STRN4  
SNTA1 DGKZ  
RTN3 FAM160A2  
GDF9 S100A8  
LCK NEDD9  
SGSM2 KHDRBS3  
HIST1H3J KDM4C  
ATN1 MAGI2  
RBFOX2 ATN1  
TAF1D POLR1E  
PPP2CAPP2R5C

NRIP1 TRAF2  
RBFOX2 ATXN1  
SVIP DERL1  
HLA-B LRRC40  
ACTN2 SSX2IP  
RORC EIF4EBP1  
ZBTB16HDAC6  
CDC34 FBXO7  
DLG4 SCN5A  
VDAC1 TRAF6  
SORBS2 SEMA6A  
RAF1 PEBP4  
KLHL20 LUC7L2  
HLA-B SFXN1  
SPI1 BCL6  
BAG1 NCOR2  
YWHAG SAMD4B  
TTBK1 NUP205  
NCK2 FASLG  
AIRE SRC  
CD4 PIK3R1  
SOCS1 TCEB3  
RAD1 DNAJC7  
SLC25A6 RELA  
EEF1D PRKAB1  
PSMB9 LGALS12  
LRP1 SCN3A  
TACC1 KAT2A  
ARID2 SMARCE1  
SHC1 IL2  
EXOSC10 CHPF  
ETS1 APLP2  
BCR IGSF21  
TGM2 MAP3K12  
AKT1 NF2  
ACVR1B SMAD3  
HUS1 DNAJC7  
PEX7 PEX13  
MAPK13 SOX9  
MMP3 SPP1

YWHAZ WTAP  
TOM1 TOM1L1  
NFKB1 SUMO1  
MAPK10 TTC19  
WDYHV1 RABAC1  
TOP1 CSNK2A1  
SNRPC SRRM2  
NAMPTIFITM3  
POU3F2SOX10  
MATN3 MATN4  
P4HB ATG5  
ADRBK1 GIT1  
GRB2 PACSIN1  
TSC22D1 COPG  
CHL1 YWHAG  
GSN PTK2  
RAD1 RAD9A  
SIP1 GAR1  
AIRE EFTUD2  
RFX3 PKNOX1  
RAB5A TM9SF4  
FASN YWHAZ  
RCC2 PRKAB1  
TBK1 BTRC  
CDKN2C CCDC90B  
NUP160MAGED1  
STAT1 RELA  
RAF1 ERBB2IP  
HUS1 RAD9A  
BARD1 KIAA1377  
SERPINB9 EEF1A1  
FANCA DNAJB1  
GADD45A HIST2H2BE  
MTCP1 EWSR1  
BRAF MAPK1  
ATMIN MAPK6  
RPN2 PHLDA3  
ETF1 FTSJ1  
COIL KLC2  
FGF5 FGFR3

CCNA2 ORC2  
SFN SH3BP4  
IKBKE KTN1  
ATXN1 USP7  
CCNA2 ORC1  
MRPS22 SUMO4  
MEN1 MYC  
NGF NTRK1  
PGK1 PRKAG1  
TGM2 AKAP13  
RPS27ANFE2  
SMURF2 GMEB1  
MLL MYST1  
COPB2 ARCN1  
C8A C8G  
RAB7L1 LSM7  
TP53 COPS7A  
GRB2 EHMT2  
APC LAMA4  
FGF2 PRMT1  
NR4A1 CHMP2B  
GTF2H1 BRPF1  
CDC20 HDAC2  
TGFB1 TGFB3  
SMURF2 SMURF1  
CIC PICK1  
HCK CSF3R  
GADD45G MAP3K4  
CBX3 MGA  
KIAA1217 EXOSC5  
GTF2E2GTF2F1  
AIMP2 LNX1  
CYBB IQGAP1  
ZMYND19 KCTD13  
CREB1 ATM  
PRPF40A SRRM2  
ZFP91 PACSIN1  
PRKACA CLTC  
APBB1 WASL  
SMARCC2 KDM5B

HGS UBQLN4  
ISL1 SSBP4  
DAPK1 KLHL20  
KPNA3 FAM50B  
MDFI NEU4  
PSEN2 MAST1  
GLI1 HDAC2  
CTNNB1 DAZAP2  
HSP90AA1 MAP3K1  
ECD SKP1  
CUL4A RBBP5  
ITGA5 SPP1  
CHEK1 XPO1  
PTPRS MOBKL3  
CDC20 CREBBP  
PIP5K1C ARF6  
CCND3 MAPK4  
DDIT3 RAI1  
IK KAT5  
RPS9 MAP3K14  
PTPRC SEMA4D  
APC AZGP1  
EIF4H C11ORF68  
AR ZBTB16  
CPSF3L INTS9  
GDF9 NDUFB9  
SRMS DDA1  
MED1 MED29  
CALM2 KCNQ5  
PRKG1 SF1  
BTBD2 C14ORF1  
BCAP31 BCAP29  
CREBBP SMARCC1  
SESTD1DAXX  
ECHS1 TRAF6  
GFAP RIBC2  
BAG6 DNAJB11  
REM1 YWHAZ  
DEDD SERPINI1  
TGFB1 TSSK1B

BRIX1 ARX  
MAP2K1 CPNE4  
MARK3 YWHAB  
MARK3 SFN  
UBE2D1 RNF165  
CHN1 RAC1  
MGST3 F10  
TRAPPC3 TRAPPC1  
PPP1R12A RHOA  
NCOR1 SAP30  
SHBG MT1G  
RARA TOP2B  
GOT2 CDK2  
TSC22D1 SRPRB  
YWHAG ANKHD1  
CDT1 FZR1  
SH2B2 JAK1  
COPS6 ORAI2  
CPT1A CLN3  
SF3B1 SNIP1  
TRIM22CIC  
BMPR1B TTC27  
ITGAL F11R  
HIF1A RWDD3  
ZBTB2 WDR48  
HP ITGB2  
FAM125A CD2AP  
C8A C8B  
NCK1 DLGAP2  
HGS EXOC7  
MAP2K2 MTERFD1  
CTDSPL SNAI1  
BAG6 REG1B  
NRP1 FGF4  
RPS27ASTUB1  
MED14 BRD4  
ACTN4 ATP6V1B1  
NDUFV1 EWSR1  
MC4R MRAP  
YWHAZ TJP2

CTNNB1 CDK5R1  
ZNF197 VHL  
DEGS1 MOBKL1B  
KCNA2 RHOA  
COPS4 COPS3  
NFX1 SIN3A  
NDC80 CENPE  
IL4R IL13  
PDGFB MDFI  
CD3EAP POLR1A  
INSR INSR  
IL6R MAGI1  
XPA RASSF1  
ATXN1 MED15  
LGALS1 SPN  
MRE11A NLRP2  
CDKN2B CDK8  
DGKQ RHOA  
NCOR1 NR1H2  
SNRNPB GIGYF2  
OIP5 BRAF  
RASA1 ERBB4  
LRRC41 MYO9B  
MED30 MED16  
PDZK1IP1 UTP14A  
TAOK1 MARK2  
CCNC CDK8  
XPO7 DDX19B  
MAPK9 PRKDC  
KIF5B VHL  
OMA1 ERBB3  
SSSCA1 CCT3  
HNRNPC YWHAZ  
GDI1 UBQLN4  
SHFM1 CDC42  
MDFI GDF15  
YWHAB SLC8A1  
RPN1 IKBKE  
NRP1 ITGA5  
RFC2 DSCC1



HIP1R ACTA1  
VARS EEF1A2  
GFI1B C20ORF12  
EZR ADORA2B  
NDUFA4L2 C14ORF1  
RPS27A TRIM25  
IL33 CRMP1  
CDC34 NEDD8  
PRNP HSPA5  
MGP BMP2  
S100A6 FKBP4  
BARD1 KBTBD7  
EGFR NUMB  
ARPC2 HLA-B  
TBX4 FAM46A  
LCK CD79A  
MAP2K2 FAM98B  
NPEPPSARF6  
TGFB1 PREB  
UBE2C EBNA1BP2  
NR3C1 DCAF6  
FXR2 MBIP  
CRMP1 HNRNPUL1  
TGFA MAGI2  
PPP4C TRAF6  
KRT6A DSPP  
SRC FLNA  
ANKRD28 DOCK1  
PIK3R1 CD2AP  
RARA PML  
UBE3A BARD1  
GADD45G IKBKG  
SRC CDH5  
TRAF1 ZMYND11  
TOE1 RAB40C  
GLIS2 XAB2  
PTP4A3 PTPLAD1  
POLA2 C9ORF25  
GOT2 GH1  
EEF1D TRAF6

CHD3 KIF15  
MAPK12 SNTB1  
CCND2 RBX1  
KDM4AHIST1H4I  
GHR TYK2  
NR0B2 HDAC6  
APC NUPL1  
PLCG1 DNAJC14  
NMB NMBR  
PVRL1 PVRL4  
CDC23 RAD54B  
EXOSC9 DIS3  
ATXN1 CIC  
LRPPRC NFKBIB  
IFIT3 IFIT5  
LYN PLCG2  
TRIO PTK2  
EXOSC10 XRN1  
ALPL TRAF2  
STK19 POLE  
EXOSC5 EXOSC1  
ACVR2A IGSF1  
ITPR1 ERP44  
SF1 TAF15  
EEF1A2TAB2  
SRC SRCIN1  
SDC4 GIPC1  
UBE2D2 BARD1  
MTNR1B COPA  
TSC2 PTK2  
FHL1 HIVEP3  
LYN IL7R  
UBE2D2 MAP3K1  
MED6 SMAD1  
RAF1 KSR2  
NR2C2 CBLB  
ATN1 SYVN1  
PAK2 ABI3  
MED6 SMAD2  
H2AFJ EZH2

AIFM1 ENDOG  
RAC1 MAP3K4  
STAT1 SMARCA4  
HTN1 MUC5B  
POLB NCAPG  
MYC SMARCA2  
GOSR1 EBI3  
CALM2 KCNN2  
PRKCB IGBP1  
SPTBN1 SREBF2  
DNM2 RPAP2  
HIST3H3 SMYD3  
SPOCK2 TES  
RHOB PPP2CA  
XRCC1 CSNK2A2  
ESR1 POLR1B  
TCP1 STK24  
F2RL2 JAM2  
IKBKAP BARD1  
GTF2F2 VAV3  
MYC DNTTIP2  
TECPR2 MAP1LC3C  
ERH COPS6  
ESR1 PTGES3  
NCOR1 HEY2  
CLN3 KIAA0368  
WDR48 WDR20  
CEND1 UBQLN4  
SFN CGN  
CSNK1D MDM2  
FYN MS4A1  
AGFG1 RNF216  
TRAF1 TNFRSF14  
JUND EP300  
CD247 ZAP70  
USP19 DMWD  
MAGEA11 SNX20  
RCC2 TRAF6  
PDE6D RHEB  
CCL20 TRAF6

ATF2 SMAD4  
CASP3 CASP4  
AP3B1 PACSIN1  
DVL2 APC  
CALCOCO2 FBXL18  
ZNF439 KRTAP4-12  
RBP4 RPE65  
IGFBP5 IGFALS  
FYN LTBP2  
PCNA FAN1  
GTF2A1 TBPL1  
RB1 NFIX  
HMGB1 HOXC6  
SF1 DDX17  
SIN3B HCFC1  
PPP1C HDAC10  
H3F3B KAT5  
ILK LIMS2  
CEP110 CENPJ  
CDK5RAP3 SRPRB  
TFCP2 HDAC2  
NR5A1 TCF7L2  
ABCA1 TIAM1  
ZFP36 DCP1A  
SRC KCNQ5  
KRT16 TCHP  
MAPK1 CAV1  
COX6B1 TH1L  
USP54 CHMP6  
MTOR EIF3B  
LYN HNRNPK  
EXOSC6 EXOSC5  
CEBPB CDK8  
TPM3 RIPK3  
RPS27A TSG101  
FAM107A TRAF2  
USP11 TCEAL2  
KRT1 YWHAQ  
C8ORF41 TELO2  
LDOC1 C10ORF18

RPS27A PCNP  
ZFYVE9 MAPK14  
GABRG2 ZDHHC3  
CBL SH3BP2  
RCC1 CSNK1A1  
SAP18 GLI1  
BMP4 HTRA1  
ACTL6A EWSR1  
POLE4 POLE3  
FYN CASP8  
HDAC7 IKZF4  
RPS27A TMEM173  
PIK3R1 SNX8  
REL SIN3A  
SQSTM1 RIPK1  
BCL10 CARD10  
TP53 MSX1  
APC NFE2L2  
NCL SWAP70  
CLSTN1 APBA2  
ITGA6 PLEC  
ESR1 BTF3  
MPG EP300  
TDG CREBBP  
TCEAL1 KDM3A  
RB1 HDAC2  
MAP3K13 PRDX3  
IQGAP1 GRB2  
RPS27A MAST2  
TUBB2B NFKB2  
ZNF558 EXOSC5  
NCF2 PRDX6  
BMP4 BMPR2  
PHF2 SUZ12  
FXWD1 PPP1CA  
GATA2 HDAC5  
MDM2 KAT2B  
ABCA1 PDLIM3  
CEBPB HSF1  
XPO1 CDKN1B

AKT1 EIF4EBP1  
GRIA1 HOMER1  
FUS TP63  
NFKBIB EXOC4  
CUL4B SNRNP40  
HSPA1L RUVBL2  
CA12 ATP5C1  
E2F3 YY1  
DCC PITPNA  
UBC UBASH3B  
KIF5B WNK1  
MDM2 DDX17  
SIN3B MECP2  
PHC2 BSDC1  
ATF7IP PLEKHB2  
NR4A1 GADD45GIP1  
DBH ITSN1  
RRAS MRPL36  
RNASEH2A SMARCA4  
ZBED1 PSAP  
HLA-B TBCE  
FCHSD2 CCDC104  
FASLG RHOA  
HSPA1L RUVBL1  
NTSR1 ARRB2  
NCOR1 HESX1  
PPARG CHD8  
CALCOCO1 IPP  
RPF1 GABARAPL1  
ITGB3BP AKT1S1  
PLK1 KIF23  
SPTBN1 SRRM2  
UBE2L6 RNF19A  
HBP1 RBL2  
GSK3B MARK2  
CREB1 CALCOCO2  
MAP3K7 IRAK1  
ZBTB48ZBTB8B  
CDH15 CDON  
TGFBFR1 SMURF1

BCR YWHAG  
KDM6A PPP6R3  
SP100 LZTR1  
MYST2 SNAPIN  
UNC119 ORAI2  
TAF7 SETD7  
GRINL1A MYO3A  
DCN FLNA  
RPL36 TRAF6  
POLR1C WDR20  
PLG CPB2  
TCP10 PARD6A  
POLR3A RPF1  
FXR2 RTN4  
SOD2 PAK2  
CDK2 TSSC1  
TRAF2 USP7  
RPL8 MAP3K14  
AHSA1 PHLDA3  
AHSA1 NEK6  
SMARCC2 BAZ1B  
SRSF5 SREK1  
SAP18 MACF1  
FBXW9 COPS6  
NKX2-5 HIPK1  
BBS7 FHOD1  
NR1H2 NCOA1  
ARRB1 CLTC  
CCT3 STK24  
GDF9 SLC38A1  
SMAP2 MARK2  
RAB14 IKBKE  
NAA38 FAM63A  
SH2D1A DOK1  
EIF5 EIF4G1  
ACTB MCL1  
CASP8 TOPORS  
UBTF TCOF1  
POU2F1 TBP  
MME NPPC

CBX3 POGZ  
CYCS RNF144B  
TCF3 LDB1  
TRAF2 TNFRSF25  
PDPK1 PXN  
APOE CYP2C8  
CASC3 UPF1  
APOE MAPT  
SDCBP TRAF6  
GSC2 RNF4  
ESRRA NRIP1  
YWHAZ ARL6IP1  
EDN1 ADM  
MAPK3 GATA4  
COL7A1 MIA3  
NCK1 ATP2A3  
SFN CDC42BPG  
GNAZ OPRD1  
KRT15 TXNDC11  
ZNF512B HEYL  
SPTBN1 ANK2  
RBBP7 HIST3H3  
PNKP DDX20  
JAK2 YES1  
JAK2 LYN  
GRB2 ZNF521  
RALB REPS2  
HTATSF1 GTF2F2  
RXRA CHD9  
ARIH2 UBE2E2  
VCL TLN1  
PLCG1 ALK  
ABLIM1 TSC22D4  
SNRNP200 SF3A2  
CD28 LRRC23  
ZSCAN1 ZNF396  
CRMP1 LRRC1  
DEC1 MYOD1  
PRPF40A VASP  
ESR1 ATAD2



CDK1 RPA2  
SGK1 CREB1  
PPP3CBGRB2  
CBL YWHAQ  
SATB1 CTBP1  
LCT SRC  
KIF5A TSG101  
COPS5 COPS3  
IL6ST STAT1  
AHSA1 EEF1D  
CCNA2 SKP2  
LCP2 PRAM1  
HIF1A USP20  
SEPT2 SRRM2  
ANXA1 FPR1  
TCEB1 COPS6  
AKT1 TCL6  
AKAP8 CCND2  
PSEN1 EFHD1  
NFKB1 ACTG1  
NTRK1 DNAJA3  
TRIM24NFE2L2  
NFKBIA TBK1  
PTPRC RNF11  
UBE2D2 RNF138  
POLR2L EXOSC5  
XPO1 BIRC5  
MYOT LRP12  
RAC1 PNPLA6  
AKT1 AHNAK  
KLF6 TAF9  
CUL2 COMMD1  
ESR1 LCK  
PHB ERC1  
PRKCA PTPN11  
VAV1 DOCK2  
AKT1 SMAD4  
SPARCL1 WNK1  
UBC SH3RF3  
STAG2 SMC3

TUBGCP4 MAD1L1  
YWHAZ PRKD1  
AIMP2 DARS2  
IMMT HJURP  
MDFI PTCHD2  
PLG HRG  
CDK4 ORC3  
SRC DDX4  
ATXN1 KIAA2026  
CDC37 RNF32  
ING3 RUVBL1  
EXOC6 EXOSC1  
EEF1D ZFP106  
ESR1 GTF2B  
HNRNPC IKBKE  
COL4A1 FN1  
MBD1 PIAS3  
PFN1 WIPF2  
UBE2D1 MKRN3  
HNRNPL HNRNPK  
COPS8 COPS3  
FBXO18 PIM2  
CUL4B KEAP1  
DAND5 ESRRA  
MCL1 BAK1  
TGFB1 DST  
VDAC1 SOAT2  
LUM TRA2B  
ESR1 TBP  
LGALS2 TUBA1A  
XPO1 HDAC3  
COL4A1 APCS  
EIF1B TP53BP1  
GPR108 FXYP6  
SUMO2 PRKDC  
CCT5 RPAP3  
HSPA2 BAP1  
PXN PKD1  
AFP CCR5  
KIF5B KLC1

ATP7B ZBTB16  
UBQLN4 EPDR1  
PNP IKBKE  
KIF5B SYBU  
E2F4 TRRAP  
SRC RTN4  
DHX9 PINX1  
HGS ZNF302  
NR3C1 TMF1  
FYN PLAUR  
IMMT PLA2G15  
HSP90AA1 PPIL2  
EXOSC5 DIS3  
TFAP2A LDLRAP1  
PTPRA PTPRS  
LDB2 PTK2  
XRCC6 CCT3  
GADD45G C7ORF64  
MDFI BAALC  
RTN3 OPTN  
ASNS IKBKE  
HSPA9 GPN1  
HIF1A HIF3A  
PTPN1 EPOR  
GTPBP3 RIBC2  
USP4 LSM4  
SMARCE1 BCL7C  
P4HB EIF4A2  
CFL1 CLCN5  
NR0B2 ONECUT1  
PTN CRELD1  
DLG4 BEGAIN  
TGFBR1 ARL4D  
ARPC2 DHX15  
PLCG1 DAPP1  
CHD3 C7ORF36  
ERBB3 AGTR2  
SCAMP2 ST3GAL3  
TOE1 ABCF3  
TIMP3 AGTR2

RNPS1 SNIP1  
ECHS1 PRKAB1  
COPB2 COPG  
NR2F1 THRA  
SFN KIF23  
TTI1 SMG1  
AKAP8 CCND3  
DNM1 TIMM50  
NFE2L2NFE2  
TXLNA STX3  
CCNA2 ITGB3BP  
COPS6 FBXO11  
RBF0X2 HNRNPAB  
RBMX SORBS3  
NCOR1 RBBP7  
PRKCA BTK  
ING3 RUVBL2  
OPA1 MYC  
PIAS2 CHMP4B  
SMYD2 EPB41L3  
MAPK9 JDP2  
SEC13 NUP133  
PRPF40A ARFGEF2  
RNF20 COPS5  
UBC LEPR  
RANBP2 KPNB1  
KIF1B MAGI1  
CASK ATP2B4  
PRMT5 PIAS4  
AIRE NUP93  
APBB1 PRNP  
GSK3B PCM1  
CFLAR NFKB1  
CHID1 STAB1  
AIRE MCM2  
PHC1 SFMBT1  
CDK1 KIF20B  
EMD SIKE1  
HNRNPD LSM5  
RAD9B RAD9A

PRPF3 DVL3  
GRIN2D SYNGAP1  
ZNF24 RLF  
AR RPS27A  
SELL SELPLG  
PPARG ZBTB20  
PPFIA1 PPP2R5D  
UIMC1 BRE  
PSMD11 CRMP1  
MPP3 MORN2  
DGCR2 SMURF2  
RPA1 RBM23  
TGFBR1 NEK6  
USP39 DDX24  
RPL36 PRKAB1  
UBTF SET  
VAV2 GRB2  
RPS27A GCKR  
HNRNPC UBE2I  
SNRNPB2 RNPS1  
CTBP2 HIC1  
OPRD1 PRKCD  
SOX10 PRRX2  
RAB6A RABAC1  
TICAM1 TBK1  
DNMT1 MECP2  
KDM6AN4BP2  
BMPR2 PDZRN3  
PRKCE MYH2  
TMEM33 ACTR3B  
YY1 E2F2  
SHBG APEH  
XRCC6 TAL1  
THRB MED21  
TP73 PFDN5  
TAF1D POLR1B  
PPP6C TIPRL  
C4BPA LRP1  
BGN JPH3  
FURIN AP2M1

MPG PIN4  
RBPMS QKI  
PTK2 PTK2B  
EEF1D RIPK3  
HGS MTHFD1L  
AMIGO2 AMIGO1  
DDX5 GSTK1  
CUL4B DTL  
MOBKL3 FAM40A  
APP MAPK8IP1  
YWHAG NCKIPSD  
ESR1 SREBF1  
UBE2I HABP4  
MST1R HYAL2  
MAGEA11 CCDC14  
EPHB2 MLLT4  
NR2F2 FAM46A  
PLDN CCDC53  
NR3C1 ETS2  
MAPT MAPK12  
VAPB STX5  
LUM WNK1  
UBOX5 UBE2H  
YWHAQ PRKCZ  
TAC1 TACR3  
SNX2 SNX6  
APIG1 AP1B1  
NR3C1 CREB1  
THRB CAMK2B  
PLG PRNP  
FBLIM1FLNB  
GRINL1A KIAA1377  
HLA-B GLRX5  
PCNA POLDIP2  
SELE SELPLG  
AIRE RANBP2  
HGS FAM5C  
HDLBP AKTIP  
PSEN2 RPS27A  
RHOA ARHGEF18

RHOA ITPR1  
HDAC4 SIN3A  
TNF SPARCL1  
GTF2F2 CDC23  
MTOR BCL2L1  
MAPK3 MAP3K14  
SETD7 L3MBTL1  
FKBP1A TRPC3  
C6ORF203 STRAP  
ACTG1 SH3GL2  
APBB1 DDX3X  
ASCC3 OTUD6B  
GPRC5C ZNF277  
CLDN5 TJP1  
RB1 THOC1  
BCAR3 LRRC59  
YWHAQ USP8  
RPS27A TSC1  
SNRPD3 LSM10  
L3MBTL1 ETV7  
PSMB3 PLK1  
TRAF3 TRAF3IP1  
CFLAR FSCN1  
LRRC59 PRKAB1  
CBX3 DSN1  
SPTA1 ANK1  
AP3S2 ARF1P1  
COPS6 ROGDI  
PRICKLE1 SMURF2  
DDOST SMYD3  
FAS FAF1  
ARRB2 AP2M1  
LAMB1 ATXN7L2  
PRPF8 MEPCE  
CLSTN1 MDM2  
CSK DAB2  
BCL10 HIST1H2BG  
ZBTB16QTRT1  
RIPK2 HSPA1B  
PTMS SMAD2

SNX4 PDGFRA  
PARP1 ERCC6  
PLD1 ARIH1  
ACTN1 MYOZ3  
SMTN ACTA1  
APPBP2FAM92A1  
KRT15 RHPN1  
APC ATF7IP  
EIF3H EIF3B  
ESR1 PRKDC  
TCP1 YWHAZ  
RGS14 TRAF2  
GRIN2B KDM5B  
TEC BMX  
TERF1 FBXO4  
ITGB2 ICAM2  
MAPK3 DUSP10  
PPP6C ANKRD28  
CTCF SUZ12  
MIP FOXA2  
SUMF2 FBXW7  
ADAM9MAD2L2  
ABCD3 MLF2  
SNRPF SF3A2  
BCL2L2BBC3  
HIF1A BANP  
VIM GFAP  
TGFBR1 STUB1  
MDFI FAM124B  
THBS1 CALCR  
HNRNPM CDC5L  
MAP3K7 CLTC  
NDUFA2 DIP2A  
ASIP MC2R  
MLLT10 MLLT1  
RBL1 SMAD2  
CCNB1 RAGE  
STK16 PASK  
DEPDC1B EXOC8  
NOTCH1 ADAM17



GNAI2 EYA1  
RAD17 RAD9B  
TCF3 MYF6  
MEF2C HDAC5  
AP2A1 AP2S1  
ZSCAN30 ZNF232  
POLA2 PRPF38A  
PRKACA ADD1  
GMNN HOXD10  
MSH4 VBP1  
PRKACA ADD2  
ORC5 MCM2  
USP11 SPRYD3  
BTF3 IKBKE  
MPZ PMP22  
DAG1 SGCA  
GRM8 PIAS2  
DBNL DNPEP  
UBE2D2 UBASH3B  
GSTM4 TLE1  
SAP18 SIN3A  
SIAH2 UBE2I  
GRM8 PIAS1  
ZEB1 CTBP2  
DEK SRRM1  
AIFM1 PELO  
EPHB6 CBL  
CHD1 HIST1H3J  
ING5 BRPF3  
PFKM CAV3  
IPO13 NUP50  
LRPPRC FOXO1  
FBL PIH1D1  
PGRMC1 HLA-B  
ASAP2 CRK  
MYC CD6  
SNAP29STX3  
RPS27A VPS36  
FOXO3 CTNNB1  
FBL LYAR

BTG2 SMAD1  
TGFB1 SNX6  
POLR2E TAF10  
STAT2 IRF9  
MAP3K11 CLEC4G  
NOTCH1 JAG1  
TNFRSF10C TNFSF10  
RPA2 GOLM1  
CDKN1A HDAC1  
PIR SMAD9  
GNB5 FBXL15  
PTPRB NRCAM  
MYO10  
SIAH1 SNCAIP  
CRK BMX  
CRK AFF2  
SMURF2 RNF11  
MAPK1 DYRK1B  
CRYAAMIP  
GADD45G CDK1  
NAT10 LYAR  
OAT C2ORF18  
PDGFRA CAV3  
VMA21 PRKAB1  
AR YWHAQ  
PCNA POLM  
TERF1 ZHX1  
TGFA ERBB4  
RBBP5 ASH2L  
EIF4G2 MKNK1  
JAK2 STAT3  
USP9X NFKB2  
TGFB1 STX8  
CASP1 TIRAP  
PABPC1 H2AFX  
HMGB1 PRKCA  
UNC119 TP53I3  
EDN1 EDNRB  
RPS11 TRAF6  
TRIP6 CMBL

MAP1LC3C ANKFY1  
HSPA5 SIL1  
AIFM1 RPS27A  
GYG1 POM121  
PTP4A3 KIAA0368  
EGFR SEPP1  
NR3C1 HSPA1B  
RBBP5 EMILIN3  
DAND5 TPI1  
VPS11 VPS45  
LIMK1 SSH3  
SMAD7 AXIN1  
BARD1 BLNK  
NFKB2 PRPF8  
FGFR3 PTK2B  
PDIA4 GRB2  
SMC1A SYCP3  
CSDE1 PAK2  
RBX1 DDB2  
MDM4 UBE2D1  
SETDB1 ULK2  
MAPT HDAC6  
RPS27ARBBP8  
SIN3B SMARCE1  
COPB2 TH1L  
VHL RPL35  
EP300 SENP3  
SLC22A5 SLC9A3R2  
PBX1 HDAC1  
QKI PTBP2  
CCL18 UNC119  
PIN1 SMAD2  
VHL CDKN2A  
NKX2-2 SIN3A  
TRIM28 PFDN5  
CD82 LRP1  
ABCA1 FADD  
NCK2 EFN1  
ADRA1A PPP1R9B  
SLC38A1 SEPHS1

KIF1B DLG3  
HNRNPC CHD4  
RAC1 FHOD1  
NUP155EPB41  
NFYA NR5A1  
GRIN2B MAGI3  
ZBTB5 CCDC85B  
IRS4 ERBB2  
CCT4 RELA  
TPM3 TFPT  
ZBTB43LMO3  
SUMO2 CRELD1  
HLA-B CALM2  
MYC NAP1L1  
NPR3 NPPC  
WAPALXRN1  
SIN3B SMARCA4  
TFE3 GANAB  
SIN3B SMARCA2  
EXOC7 RTN4IP1  
GTF2B NCOA1  
CDC37 PRAM1  
ATN1 CENPJ  
PSEN1 UBQLN1  
ESR1 UBE3A  
SRC PTPRA  
DDX1 RAD50  
PTPN11 SOS1  
HADHBGABARAPL1  
TRIM25UBE2D4  
MDM2 DAXX  
MYC UBE2L3  
MAPK3 METAP2  
RB1 PAX2  
CYP1A2 POR  
CSNK1A1 YWHAZ  
HSPA4 BCOR  
RPS27A CDC6  
SPTBN1 PACSIN1  
STAT3 LEP

RBL2 SKP2  
LYN TYK2  
SMAD7 ZNF107  
ATN1 RBPMS  
DAG1 NCSTN  
ATXN2L TOLLIP  
MED21 TFG  
ACTC1 KLHL17  
BUB1B PARP1  
MED21 ESR2  
MFN2 TCHP  
YWHAG PRKDC  
CSNK1A1 NFATC3  
ECHS1 TNIK  
HSP90AB1 CDKN2A  
NUP155 TFE3  
MAPK12 SNTA1  
CD2BP2 RBL1  
PHB ANP32B  
UBE2D3 STUB1  
TPH1 YWHAH  
PIN1 NCOA3  
PLD2 ALDOA  
LMNA CASP1  
PDPK1 PTPRO  
HLA-B COPG  
WDR5 MLL  
PTPRC ZAP70  
PARK2 DNAJA1  
MAPK3 ETV1  
ITGA5 RABIF  
PTK2 DOCK1  
RELA RPL18  
MAPT PKN1  
MSH6 MUTYH  
STRN4 TRAF3IP3  
ARIH2 KAT5  
NCOA6 ASCC1  
GTF2F1 CTDPI  
MAP2K3 DYRK1B

TBL1X HDAC5  
SF3A2 SRSF7  
PDGFRB SYNGAP1  
NPM1 SREK1  
POLR2C INTS2  
HDAC1 MKX  
SDC3 TUBA1A  
MYO1BMYC  
SMARCE1 CHD7  
DDX49 HAP1  
TRIP13 HDHD3  
TFE3 RPGRIP1  
RET GRB10  
CDK9 TRIP12  
VAV2 PHF10  
GSK3B ANKRD6  
PCMT1 CD40  
TAB1 TRAF6  
LRP2 APBA2  
MEN1 MLL2  
EWSR1 SLC22A24  
MAP1LC3B RABGAP1  
APP IDE  
KDR CAV1  
KAT5 CRELD1  
CHAT PRKCD  
CD40 HSPA4  
PIK3CDPIK3R2  
SORBS2 ABL1  
GLI3 SMAD4  
HSPA1B EIF2AK2  
PTK2 UBAP2L  
CCNB2 MCM2  
EGFR DCN  
LZTR1 ANKRD53  
SMAD7 MBD1  
CFLAR SUN2  
NEURL UBE2H  
UBC SQSTM1  
CTNNB1 RBBP5

KRT7 GRB2  
ZBTB43ZNF417  
SERPINE1 LRP1  
FGFR3 POLA2  
KPNA5 AICDA  
PAICS HLA-B  
DDB2 COPS5  
CEBPB BHLHE41  
OAT UBQLN4  
IKBKB TSC1  
HDAC3 RB1  
PSMD10 RB1  
VHL SEPT2  
ORC5 CDC45  
PRKCB YWHAG  
RBP4 GRB2  
TGFB1 UACA  
EXOC6 MAST1  
RAC1 SHANK1  
UBE2I PPM1J  
MDM2 FBXW7  
RAF1 MAP2K1  
SNX2 INSR  
MSH2 SLX4  
STK4 STK3  
COL4A1 NID2  
AR ERG  
SPOP KPNA6  
AHSA1 GSTK1  
CCR8 CCL17  
TGFB1 RAB34  
FOXP1 HES1  
HOXA11 HDAC1  
APOA1 PLTP  
EGFR RIN2  
KIF11 DCTN1  
SNAI1 RELA  
IL10RB IL10RA  
RPL23 TRAF2  
GSK3B RPF2

NPM1 CASKIN1  
PTPRB NSF  
USP11 KCTD6  
SYNCRIP PRMT1  
FES ABI1  
PPP2CAEIF4EBP1  
MCM3 STAT1  
CD9 PTGFRN  
PCNA PPIA  
TRIM27GF11B  
EFEMP2 IL16  
XPA RPA4  
DNTT DNTTIP1  
SUPT5H CCNH  
EP300 GTF3C1  
CPNE4 MYCBP  
CDK2 TSPYL2  
ACTN1 NR1H3  
PLIN3 PRAF2  
CUTA GRB2  
GRB2 PWWP2A  
NCL CSNK2A2  
DVL2 PRKCB  
HGS AHCYL1  
GLTSCR2 HAP1  
KCNA2 CTTN  
ARRB2 NOLC1  
WDR5 WDR5B  
HGS C3ORF1  
EEF1A1BRMS1  
MAP2K7 MAPK14  
INS CTSD  
GZMB GRIA3  
CD4 HLA-DPA1  
RAF1 GNB2  
COL4A2 BMP3  
STX1A TXLNB  
BAG2 NFKB2  
EP300 SREBF2  
TCEANC NINL



NLK LEF1  
CCL21 CCR10  
RPL13 MAP3K1  
PPP1R10 TERF2IP  
NCOR1 NFE2L2  
BSG RANBP3  
HLA-B SLC1A5  
WDR5 MLLT1  
BCL10 TRAF2  
HDAC3 PIAS2  
ACTN4 CAMK2B  
ACTN4 CAMK2G  
IKBKB TGFBR1  
NCK2 NCKIPSD  
HIPK2 WSB1  
CCNT1 HEXIM1  
ITGAV MMP2  
CCBP2 CCL4  
ZAP70 DBNL  
PRKCA PPP1R14A  
XRCC5 ATM  
YWHAG FAM13B  
CTNNB1 PTPRK  
HDAC3 RBL1  
YWHAG FAM53C  
CRYAB PSMA3  
POLR2B RPAP2  
ATP5B APC  
RNF144A E2F2  
KCNQ3 KCNQ5  
EPB41 RAB5C  
CBL MAPK8  
CBLN1 CBLN3  
YWHAG BCLAF1  
SFN DYRK1A  
PCNA RPS27A  
TAF6 HDAC2  
LNX1 EHMT2  
OPRK1 GABARAPL1  
MOCS3 MOCS2

KIF11 KAT2B  
ARRB2 SLC9A5  
HLA-B DCTPP1  
SIP1 SMYD2  
PRKACA ETV1  
F2R GNA15  
PARP1 PCNA  
DAND5 MAPK1  
ADRA1A ADRA1B  
UCHL1 CBX1  
PLCG1 SLC23A1  
QARS MAP3K14  
APBB1 PABPC1  
TP53 YWHAE  
ATXN1 FAM193B  
RNF138 UBE2D4  
RAC1 CNTNAP1  
RAC1 PIP4K2B  
PCNA RPS27A  
SORBS2 EGFR  
EP300 EMB  
GABARAP NCOA7  
KCNA2 PTK2B  
TCF3 SIN3A  
HRAS IKZF3  
GMPS PRKAG2  
H1F0 CDK2  
EIF1B SSR4  
ATR HDAC2  
NME3 UBQLN4  
CNR1 GNA15  
ADRB2 GNA11  
CD5 CD2  
PFN1 MYPOP  
CSNK1E BID  
HNRNPC SMARCC1  
HRAS RARRES3  
CSNK2A2 RELA  
PSEN1 ICAM5  
SLC2A4LEPRE1

GABRB2 ARFGEF2  
ZFC3H1MYB  
SLC27A4 TMBIM4  
ESR1 MDM2  
HEXIM1 CDK9  
RCAN1 PPP3CA  
PRKACA VASP  
MED21 CREBBP  
SRF MYOD1  
GLI2 HDAC1  
SRF MYOG  
SFN BAD  
ATN1 GIGYF2  
ATP2A1 TNFRSF1B  
ZBTB43LNX1  
MAPK8IP2 FGF12  
HCN3 HCN4  
PPP5C PPP2R3A  
SMARCC2 RCOR1  
BTK CMTM3  
BRCA1 PPP1R3A  
TUBGCP6 MKNK2  
ZSCAN1 INSM2  
NCAN CNTN2  
PPIH TNIK  
RAP1A HDAC1  
CDT1 ANAPC5  
SRSF5 SF3A2  
GTF2B EP300  
WAPALSRRM1  
YWHAH MAP3K3  
PFN2 ACTB  
RPS6KA4 MAPK14  
RAC1 TRAF6  
CSNK2A1 TAF1D  
NR2F2 FAM46A  
CRMP1 RGL2  
CELF2 PCBP1  
RAC1 ARHGEF19  
PLEKHA5 LARS

ELN PRTN3  
SFN TNK1  
TRAF2 WDR65  
CDT1 CDC23  
BMP2 Bmpr2  
USP11 POLR1B  
HIF1A ARNT2  
TRAF2 MAST2  
CASK F11R  
HCRTR1 CNR1  
KNG1 CPN1  
CDC23 TSC22D4  
RALA RGL4  
CDK5RAP2 STARD9  
ADCY6 RAF1  
NID1 PRELP  
CCDC91 SYNRG  
HIST1H4I H3F3B  
ATP5A1 YWHAB  
HAND2 EP300  
DAND5 EP300  
PRKCH CADM3  
NADK YWHAG  
GRIK2 DLG3  
MRE11A TERF2IP  
GRINL1A ANKHD1  
ID1 PSMD4  
CFLAR CDC37  
POLR3C POLR3F  
RAD51C RAD51L3  
EIF3I LYAR  
SLC25A5 MAP3K3  
POLB TLE1  
DSG1 PKP1  
MAP1A DISC1  
PIN1 MED1  
DHRS7B BRE  
SUMO1 CHAF1A  
CCDC33 RAD54B  
AIFM1 TNFRSF1B

RIOK3 PSMB1  
CCT5 ACTB  
SMAD2 WWP1  
NUMB MDM2  
MGMT EP300  
SRC EPS8  
SF3B2 RNPS1  
MYC SMARCC2  
HNRNPM MAP3K14  
UBE2D3 RNF150  
RET CBLB  
GSK3B CREM  
GEMIN4 TSC22D1  
MDM4 YWHAZ  
AHCYL1 USP42  
BMI1 CENPA  
CHEK2 MDC1  
H3F3B SF3B2  
CD3D CD3G  
HOXA3 SOX10  
CYP27B1 POU2F1  
PRKCB EIF4E  
FZD7 MAGI3  
GP1BA YWHAB  
CAST PIK3R1  
PSMB9 NCOA3  
TP53 HIF1A  
TP53 IFI16  
FGR INPP5D  
GSK3B AXIN2  
EIF3F EIF3L  
EIF3E TRIM63  
BCL10 RPS27A  
MYL6 PINX1  
APC GRIK5  
THRA DAP3  
ACTN1 CDK5R2  
EEF1D GRB2  
HOXD4 CREBBP  
CBL YWHAG

PSMC5 GTF2B  
C3 GPR77  
PCNA TRAF6  
PLD2 CSK  
ESR1 CUEDC2  
PRPF6 CD2BP2  
STX4 VAMP3  
SMARCB1 SMARCD1  
BCL10 RPS27A  
GOSR2 ARF1P1  
COPZ2 COPG  
KDM6AC13ORF23  
HDAC4 NACC1  
PFDN1 TUBA1A  
UBOX5 UBE2D2  
HNRNPH3 CRMP1  
GIPC1 ZNF408  
MAP2K7 MAP3K11  
HOXB9 SLC38A1  
USP4 EDC3  
MAP3K10 CNKSR1  
FBL DDX56  
SSSCA1CCDC33  
NR3C1 MAPK8  
FN1 PKD1  
KPNA3 NFKB1  
EPAS1 BBS2  
FN1 HSPG2  
BAD BCL2L10  
GNB2 PCBP1  
VDAC1 PANK2  
PRKCG HABP4  
EP300 TP63  
MAPK9 PKP2  
CDK19 MED29  
RELB ARID1B  
CDK1 RPS27A  
AKAP1 MYCBP  
NRF1 PPARGC1A  
ECHS1 PAK2

ARL4D UNC119  
TP53 BAK1  
CYBA NOX1  
EMILIN1 EMILIN2  
VHL CUL5  
FAM175B UIMC1  
JAK2 FES  
MYC SNIP1  
PTPN11 ARHGAP1  
CCL16 CCR1  
SHC1 IQGAP1  
CAPN3 NECAB2  
MAP3K3 TUBB2B  
SOD2 MCC  
MAP3K6 NUB1  
MDM2 BAIAP2  
NUP62 NXF1  
MET PTPN12  
SPOP DOK2  
CDK9 RBM39  
ERBB2 STUB1  
MED4 MED29  
YWHAH HDAC7  
PXN GSK3A  
HNRNPA1 IGF2BP1  
MAP3K8 TRAF6  
PXN GSK3B  
SORBS2 MLLT4  
UEVLD RNF114  
UBE2N NFX1  
RAD23A UBQLN4  
MYST2 PPID  
CASK CD2AP  
TERF1 TINAG  
PLG CHGA  
POLR2B RPAP1  
ERCC3 ERCC5  
UHRF1 DNMT3B  
DNMT3B EZH2  
AKT1 MS4A2

SUMO1 PROX1  
TENC1 GF11B  
ACTC1 FSCN1  
PLG C7  
NUP153KPNB1  
SRC PDE6G  
DDX5 PHLDA3  
RHOC ARHGAP1  
E2F4 NR2E3  
MRPL28 OXA1L  
TOM1L1 VAV2  
SUMO1 TOP2B  
YWHAG KIF23  
PEBP1 NR2C2  
ITGB3BP POLA2  
SYNJ2BP LRP1  
FLNA SH2B3  
TLR3 MYD88  
PROC F5  
EPS15 REPS2  
SNRPE YWHAH  
GHR PTPN6  
RPS27ACDX2  
HMGA1CSNK2A1  
PLSCR1EWSR1  
STAU1 FMR1  
GHR SHC1  
MAD2L1 TSC22D4  
TAF4 ATF7  
GDI1 RAB1B  
PHB HDAC1  
PSMB9 NCOA2  
ATN1 SSPO  
RAE1 WDR24  
EMD HNRNPK  
ATF2 ATP5C1  
PHB SET  
NR1H2 NCOR2  
MDM4 SUMO1  
RPS27AKLF6



PTPN4 GRIN2A  
MDFI C8ORF33  
CSNK2A2 ARR3  
RBL2 BRF2  
TGOLN2 AP1M1  
CDKN1A CUL4A  
MDM2 SMC3  
PSEN1 NOTCH3  
UEVLD TRAF6  
STAMPB GRAP2  
TAX1BP1 STARD13  
TRPC1 TRPC6  
PRPF40A SF3A3  
PRPF40A CHD3  
DDOST DEPDC1B  
MYO1CCBL  
CXCR2 PPP2CA  
LRPPRC CCNA1  
RPS27AELF4  
RFX3 TRAF2  
FCGR2B CRK  
FKBP2 ARFGEF2  
TSHR GNAQ  
SUPT7LTP53  
ARHGAP8 SH3GL1  
PLSCR1FBXL18  
PABPC1 PIN1  
ARRB2 AP1B1  
HNRNPK RBM7  
FKBP2 ARFGEF1  
CLPS PNLIPRP2  
NSL1 DSN1  
IL6ST CTF1  
STRN4 KLHDC2  
RXRG ITGB3BP  
SMAD4DCP1B  
YWHAG SRRM1  
CYP27B1 COPS2  
KIT PRKCA  
PRKCA FLNA

PARP1 APTX  
HSPE1 ATG5  
COL18A1 FBLN2  
RINT1 XPNPEP1  
CASP3 PSEN2  
PCNT CHD4  
MAGEA11 MLF1  
MAPK3 RPS6KA3  
DSC2 DSG2  
SCAMP1 TP53  
ESCO2 PHF21A  
DDX5 RIPK3  
TAX1BP1 TRAF6  
ING5 C19ORF50  
NPM1 CTNBL1  
F10 PLAT  
STAMPB AFP  
CHMP2A VPS4B  
SH2B2 JAK3  
CDH1 CTNBL1  
CDH1 CTNNA1  
NFKB1 TUBA1A  
BRCA1 EP300  
ENO3 RPS3  
MEGF10 SCAPER  
NCBP2 SF3A2  
TP53 THAP8  
DCTN1 HDAC6  
CDK1 HMGA2  
RPL28 UBE2D3  
H3F3B PARP10  
EPHB2 GRIN2B  
IGHM VPREB3  
NCKIPSD DMRTB1  
F10 PLG  
PHB PHF3  
SMAD9 PHKA2  
PIK3C2B SHC1  
TAF12 TAF9  
HOXB13 ALX4

PTPN6 GRB2  
NUP62 CCDC53  
HSPB1 IGSF21  
HIP1 CASP9  
BMP4 NOG  
CHAT PRKCZ  
SOX15 HOXB9  
PSMD14 PSMD1  
MAST3 PTEN  
AP2A1 NAGPA  
ETS1 MAPK3  
RASA1 CASP7  
MED21 KAT2B  
ANK1 L1CAM  
GBP2 BTBD2  
ADRA1B GNAQ  
PHB2 FLRT3  
TP53 PARP1  
DLG4 GRASP  
NDUFA6 PHLDA3  
ELF3 CREBBP  
CHEK2 ERCC6  
DCN THBS1  
CHRM3 NALCN  
JAK1 TYK2  
ATM SMC1A  
IER3 CAMLG  
PIK3C2B LTK  
POLR2B GSK3B  
EP300 CDC20  
GRB2 TRAIIP  
SVIP AMFR  
TRIM46 AK5  
NFIC TLX1  
SMAD7 HDAC3  
NRAS RPS20  
UBE2L3 CBLC  
IL4R IRS1  
ZNF250 ZBTB8B  
EXOSC6 EXOSC4

TP53 POLA1  
UBE2N TRAF2  
AXIN1 APC  
CDK19 MED9  
LCK MS4A1  
ATM MDC1  
GSK3B STRAP  
UBE2N MID2  
ERBB2 PLCG1  
FANCI USP36  
EIF3H ABI3  
HTRA2 NDUFA13  
DEGS1 SURF4  
LTA4H TMEM62  
RAP1GDS1 RAC1  
MAP3K3 RNF126  
MAP1LC3B ATG4B  
PTH PTH1R  
HIST1H3J DYRK1A  
GTF2F2 GTF2B  
HRAS RALA  
RPS27A GFI1  
CDC42 ERRF1  
RGS5 GNAI1  
RPS27A MAP3K5  
CEACAM1 FLNA  
RAB5C RIN2  
CALM2 ESRRG  
UBE2E1 RNF165  
KIF3B KIF3A  
BID BCL2A1  
CCT8 TBK1  
SMARCC2 ING1  
THRA CREB1  
GSN PTPN12  
HIST1H3J CUL4A  
PSMD10 CDK4  
SPRR1B USF2  
SRC GUCY2C  
IKBKAP TAC3

HLA-B TRIP11  
HSPA5 CDK9  
EIF1B UBE2D1  
TBP SMARCA2  
ICAM3 ITGAD  
HSP90AA1 ARNT  
RB1 PIK3R3  
GPRC5C OLA1  
MAP4K4 PIN1  
RAF1 RPS27A  
EIF3F TSC1  
RACGAP1 ECT2  
EP300 TP53BP1  
GRIA1 CACNG2  
RER1 SH3GL3  
SRC ADRBK1  
AIF1L RIPK3  
HSPA5 NFKB2  
NCOR1 PDCD2  
GH1 PSMD13  
WASL EEF1D  
NR3C1 TP53BP1  
RANBP2 PTBP1  
EFS CRK  
MYST2 SLC38A1  
SMPD2 PIK3CG  
CDC25C PKN1  
DPEP3 RBBP7  
RGS1 FUNDC2  
QARS MAP3K5  
NOP56 KLF6  
USP19 GCN1L1  
DPEP2 TACC3  
NRD1 FBXW11  
ACVR1 KLHL35  
FAM48A UBQLN4  
CDCA3 TRAF2  
CARD18 CARD8  
ERBB3 RPS27A  
ITPR1 EPB41L1

SLC9A3R1 GNAQ  
NUP93 GSTK1  
ACTA2 PCYT1B  
DDX20 NCOR2  
RBMX PSMF1  
ERBB3 GRB2  
CDK2 POLD2  
AP1G1 AP1M2  
HLA-B TSN  
CDC25C MAPK14  
CSTF2 UBQLN4  
ITGAL ICAM3  
GLI3 HDAC1  
TXN PSPH  
PTEN PPP1CA  
AZIN1 FANCC  
SIAH1 PIAS3  
NPPB EWSR1  
LRRC59 USP20  
F8 LMAN1  
COPZ1 COPG  
PLSCR1DLK2  
RPS27AESR2  
PXN SORBS1  
ERBB2 SOS1  
PLSCR1ADAMTSL4  
PPM1A CACNA1C  
TRA2B TNPO3  
RFC5 UNC119  
DKC1 LYPLA2  
RAD1 RAD9B  
ABL1 CTNNB1  
YWHAH MAP3K5  
PPP2CAKISS1R  
PDCD10 CHMP5  
XPC SMAD1  
KLHDC10 SH3GLB1  
HNRNPC AP1M1  
RBBP7 SIN3A  
CSNK1A1 BID

MCM10 CDC5L  
EP300 HIPK2  
ZNF250 ZNF165  
HLA-B MAPRE1  
MAN2A2 LUC7L2  
HLA-B WDR48  
GNA12 BTK  
SEC22BIKBKE  
HIVEP1 BTRC  
RPS27A CREBBP  
HTATIP2 ASF1A  
NFIC GLRX  
RB1 AURKB  
SUMO1 FADD  
MAN2A2 GIT1  
SF3A2 RBM17  
HSP90AB1 FBXO33  
HMGA1CEBPB  
SRC ACTB  
USP1 MYH9  
PSG4 SMAD2  
TP53 PPP1CA  
SLC12A2 STK39  
HLA-A HYOU1  
CRK STAT5B  
DAND5 MSX1  
HLA-B SUPT16H  
BRCA2 SHFM1  
ATG13 MAP1LC3C  
EIF2B2 EIF2B4  
RPS27A STAM  
PMS1 BRIP1  
SMAD2 NUA2  
NR3C1 SMARCB1  
SNRPD2 SF3A2  
FLNA OTUD5  
MED4 MED9  
HCFC1 ZNF335  
GRM7 PICK1  
SUMO2 ZNF496

XRCC3 ZNHIT3  
TEC PTPN21  
ACTL6A KAT2A  
NCL APTX  
UBE2E1 TRIM2  
ATP6V1B1 ATP6V0A1  
SRF NKX2-3  
DLG4 LRP8  
RBPMS ZC3H10  
ISG15 RGS3  
CSNK1A1 PPP2CA  
MYOD1PSMD4  
XRCC5 ATR  
CDK4 PPP1CC  
PDGFRB PTEN  
SF3B4 FAM115A  
AR UBE3A  
TRRAP MRFAP1  
GNAI2 MDFI  
DGKI VHL  
UBE2L6 RNF144B  
GFI1B GRIP2  
TRIM37TNFRSF1B  
DDX5 STK24  
RPL35 PINX1  
RAB5A RABGGTB  
RFX1 NFIX  
ITGB4 GRB2  
GSPT1 ARF6  
SPN MSN  
TEC PTPRO  
PTN GPRASP2  
CRK FRS2  
TLR4 RNF216  
NFKB2 TBK1  
PRKG1 FHOD1  
HSP90B1 FANCC  
PGR CCNA2  
ARRB2 MAPK9  
PCNA SETD8



IKZF4 IKZF5  
ARRB2 MAP2K4  
PLSCR4EFEMP2  
ABL1 CAV1  
SVIL NR3C1  
GEMIN4 STXBP2  
ELAVL4 EWSR1  
PTP4A3 DDOST  
EIF4A2 GNG12  
ARNTL EP300  
FAM190B EXOC1  
CDK4 TGFBR1  
EXOC8 PLDN  
MAPT SNCA  
ALDOAATP6V1E1  
HDAC2 SALL1  
PTN SLC25A36  
NCL PPARGC1A  
SHMT2 BRE  
TMCO1 GSTK1  
PRPF40A WBP11  
CALCOCO2 TP53RK  
RHOD ARHGAP29  
MAP3K7 DARS  
NFKBIA FBXW11  
TGFB1 APP  
SPTBN1 TNIK  
IRAK1 CAMKK2  
SMAD2 ERC1  
HLA-B ARF6  
MCM7 PLK1  
APBB1 APLP1  
TP53 TAF9  
GBP2 SEPHS1  
SPP1 CD44  
RBL2 USP4  
HIST1H3J MYST1  
PPP5C CPNE4  
SRC SMARCB1  
PEX19 SMAD2

RPL5 RPS23  
EZR BID  
CLIP1 CDC42  
FYN CAV1  
MECOM UXT  
EGFR AHNAK  
TRIM63 TRIM55  
MCRS1 ITS2  
SPTBN1 CEP63  
TRIM63 TRIM54  
SLC25A6 MAP3K1  
ZHX3 ZHX2  
GLI3 SKI  
XPC ERCC4  
RELA NSD1  
HIST1H3J CBX1  
LDLR LRPAP1  
YWHAZ SF3B3  
CCR5 CCL8  
RAB27B RPH3AL  
UNC119 ORAI2  
HRAS RAF1  
IGFBP6 UBQLN4  
ARPC3 CTTN  
APC LAMA3  
GSK3B GEMIN4  
MTA2 HDAC1  
HRAS PRKCI  
GHR PTPRK  
BRAF RHEB  
CNST EWSR1  
BCAR1 TUBA4A  
JAK1 CSF3R  
HLA-B SRP14  
TAB1 RUVBL1  
ATP5C1PAWR  
MTA2 ATR  
NDUFS1 MDH2  
HSPA9 RIPK3  
ZMYND19 MCHR1

RND2 RACGAP1  
CYFIP1 NCKAP1  
COPS2 COPS3  
PHB E2F1  
RIPK2 TUBB2B  
ERH TRAF6  
F12 APOH  
TAB1 MAPK11  
FANCA RMI1  
NPM1 PARP1  
C3 CR1  
WASL PRPF40A  
RPS27AEEF1A1  
HLA-B CSF1  
RHOD CNKSR1  
CCR5 CCL7  
PDZD2 PKP4  
DEDD DEDD2  
NDUFB10 TSC1  
CUL5 SMURF1  
NR1I2 NCOA3  
MATR3 DISC1  
KLF4 RPS27A  
TNFRSF21 APP  
NUDT5 TRAF6  
SEPT11 TRAF6  
CBL SLA  
XRCC6 SUMO2  
STC2 POLR2C  
RAC1 SH3BP1  
PIN1 TSC22D4  
MAPT PHKG1  
SLC9A3R1 EGFR  
NRIP1 CTBP2  
SAP18 RGS10  
BIRC5 BIRC6  
USP11 PIK3C3  
PPP2R1B PRDX1  
CASP10BFAR  
CDK1 IL16

PDGFA PLCG1  
PPP1R12A YWHAG  
HNRNPL ZNF143  
UBE2U MID2  
RAB27A SYTL1  
HSPA1B FCHSD1  
PRKACB CBF3  
RHOQ EXOC7  
SRC GRIN2A  
HDAC2 HELLS  
TOM1L1 GSN  
MAP2K2 ZDHHC3  
PLXNB1 ARHGGEF12  
RAD51L1 RAD51L3  
SEC31AITGB2  
LYN SHC1  
S100A9 CDC42  
LAP3 UBA5  
LYN PTPN6  
ERBB2 PTPRC  
AKR7A2 TRIM63  
POU3F2POU3F4  
MCM2 MCPH1  
MAPK1 SMAD3  
EIF2S2 PLEKHM1  
FEZ1 ZNF251  
EIF4A2 EIF3K  
DLG4 NCKIPSD  
GDF9 BMP15  
PTPRC CD44  
NR4A1 PCDHGC3  
PHF16 ING5  
POU2F1MSX1  
TP53 HMGB1  
HMGB1ZNF24  
ATP2B1CALM2  
YWHAH DMWD  
SRC VCL  
CDKN1A SKP2  
SMARCC2 CARM1

PSEN1 APH1B  
NDRG1 EWSR1  
CHD4 XRN1  
HRAS CAV1  
GABBR2 ATF5  
SUZ12 EZH1  
CASP5 MAX  
EP300 HDAC6  
ASS1 AKTIP  
TCL1A CALCOCO2  
MAPK9 DUSP19  
HSPA9 TRAF6  
SMARCE1 CARM1  
TRIM27 UBE2U  
BID BAK1  
NDUFB3 ATP5C1  
CCNB1 CDC14A  
ATF2 MAPK1  
CTCF SIN3A  
YWHAG PRPF38B  
RELA KAT2B  
DDX5 NCOA3  
RPS11 NFKB2  
CDK1 PBK  
TSC2 UBE3A  
SVIL YWHAG  
SUZ12 JARID2  
NCL MAP3K14  
BIRC5 INCENP  
PBX2 PKNOX1  
CTNNBIP1 RUVBL2  
EP300 PPARGC1A  
CSNK2B RPAP1  
HLA-B SERBP1  
POU2F1 TEAD1  
ALOX5 GRB2  
NCOR1 PPP1CC  
YWHAG CCT2  
MAPK3 GTF2I  
PLAT SERPINI1

PSEN1 CIB1  
LYN SRC  
YWHAG KRT85  
PIN1 PRKAB1  
EPHA2 EFNA5  
RAB4A ZFYVE20  
APBA1 STX1A  
HLA-B TBCA  
SPERT NINL  
PPP2R1A PPP4C  
AR SRY  
STX6 VPS11  
BMI1 USP11  
PRSS23 SLC25A6  
RAB3C RPH3A  
GABARAP AES  
PGK1 PMS1  
ADRB2 PRKCD  
TNFAIP3 IKBKG  
PIAS1 NR3C2  
PFKL HLA-B  
RGS12 PLCB3  
PTP4A3 SEC61A1  
CAMK2G MYLK  
NFYB TAF11  
PRPF40A WAS  
EIF3F EIF3A  
GNB2L1 CCNA1  
PLSCR1DHRS1  
PPFIA3 GIT1  
TAX1BP1 RNF11  
ST13 IKBKE  
RPN2 TMBIM4  
PRKACA PPP1R1B  
UBE2N AMFR  
SF3B2 SF3A2  
THOC7 TSG101  
LDOC1 ZNF408  
EWSR1 EIF2AK4  
SF3B2 SF3B4

EEF1D IKZF5  
NR2C2 FKBP5  
TIAM1 PARD3  
NRARP IKBKG  
AMOT UIMC1  
HMGA1EWSR1  
RPS14 RELB  
HSP90AA1 VEGFA  
C1ORF94 RBPMS  
MAP1B GSK3B  
HNRNPK TCEA2  
CFLAR DAXX  
USO1 CSNK2B  
SRSF2 SREK1  
EED HIST1H3J  
TP53 CSNK2B  
RPS15AEWSR1  
SCAPER CELSR3  
NFKBIA MED19  
TFPT INO80  
DBF4B MDFI  
FRS3 GRB2  
ATR UPF1  
COPB1 COPG  
ACTG1 TAB2  
PIN1 TRAF6  
RGS1 UTP14A  
RAB1A GORASP2  
ZNF644 CDYL  
PKM2 MDM2  
SRC EDNRA  
EGFR FES  
PTN ATP5C1  
PGRMC1 IKBKE  
PRKAR2A GSK3B  
TNFSF11 NFKB1  
GSN MDM2  
FEM1B MID2  
CAPN2 NFKBIA  
VHL EIF1AX

SUMO1 KHSRP  
ATF3 IGSF21  
STAT4 ZNF467  
XPA ATM  
RAP2A RALGDS  
FSCN1 FTSJ1  
CD2 GIGYF2  
TGM2 PPHLN1  
CPLX1 SNAP25  
TUBA1A HDAC6  
FAM160A2 RABAC1  
HIST1H3J HDAC1  
ERBB2 ITGA5  
TP53 RRM2B  
HOXD4 HOXB13  
STK38L STK24  
EEF1A1 XPO5  
RTN1 HDAC8  
NRIP1 CARM1  
CDH1 RPS27A  
BAG2 TRAF2  
DLG4 KCND2  
EDNRA GRK6  
ALOX5 TGFBRAP1  
NDRG1 AP1M2  
TBP PAX3  
HDAC2 PHF21A  
UIMC1 DPY30  
CCNE1 FOXM1  
SHBG SRI  
SOX9 SMAD3  
CTBP2 ELAC2  
WAS CDC42  
NFYA TAF6  
SMARCC2 MAP3K3  
RAP2B RAPGEF2  
TEK PTPN11  
FCHSD2 VCPIP1  
MRE11A DCLRE1C  
HSP90AA1 CUL4A



GRB2 MTA3  
RB1 RBAK  
SIN3A IKZF4  
DFFA NECAB2  
SORBS2 VCL  
LMNB1 MCM10  
TNFSF14 TNFRSF14  
THRA GTF2B  
TP53 HSPA9  
ZNF3 ZNF182  
SUMO4 STOML2  
GRB2 C1ORF55  
BCL6 RUNX1T1  
ACTA1 TJP1  
PSMC2 GRINL1A  
PLEC COL17A1  
SPI1 IRF8  
LGALS1 MUC16  
UBE2N RPS27A  
CCDC33 TSC22D4  
NFKB1 ERCC6  
EPHB4 GPRIN1  
ARRB2 MED8  
GOLGA2 RAB1B  
NOL4 PRMT1  
ADRBK1 RCVRN  
CSTA EVPL  
SORBS2 TRAF4  
GAK AP2M1  
GRIA4 PICK1  
CRMP1 CDK5RAP2  
RHOA ARHGAP21  
BMI1 CDC6  
MMP7 BCAN  
SREBF2GATAD2B  
LZTR1 PAPOLG  
RAC1 ARL2BP  
MAP3K8 TNIP2  
PSMD12 PSMD14  
IL21 IL21R

ZNF24 UNC119  
PKM2 ARRB2  
RAB3D CYP2C9  
ERH PRKAB1  
USP54 CHMP4C  
OXTR GPRASP1  
HSP90AB1 CDK9  
ESR1 RNF4  
AKT1 PAK1  
TAF2 KDM5B  
RAB7A ATG5  
PPP2R5B CCNG2  
SKAP2 TGFBR1  
SYVN1 SVIP  
BRAF RPS6KA2  
AP3B1 CLTC  
CRHR1 GNAQ  
ALB YWHAE  
CPSF6 WWOX  
KIAA0368 IKBKG  
CD247 PTPN3  
EXOC8 MBIP  
CD5 ZAP70  
WASL CIB1  
ARNTL UBE2I  
TEAD2 NCOA1  
RPLP2 RELB  
CCNA1 HIST1H1A  
SUMO1 COL16A1  
CYP27B1 LCOR  
EPOR GAB1  
PSMC2 GRINL1A  
NTRK1 SHC3  
PSMC2 SUMO4  
NMU NMUR2  
ETS1 AARS  
ACP1 KDR  
FOXA3 TLE1  
FOXA3 TLE2  
CALM2 IKBKE

COPB2 GSTK1  
TNFRSF10B ARAP1  
ERBB4 RNF41  
TAF7 TRIM22  
ARHGDIA RAC1  
GNA12 AKAP13  
SKIL CPNE2  
H2AFJ BRCA1  
STRN FAM40B  
HRAS RGL4  
CAMK2G SMAD2  
ATM OBFC2B  
PRKCG GJA1  
COL3A1 PCOLCE  
ACTG1 FEZ1  
LMO2 BEX2  
FOXO3 FKBP4  
ZAP70 CARD11  
CSNK2B HIRIP3  
UIMC1 LIN7C  
YWHAG KLC1  
ERBB2 ERFF1  
MTHFD2 MCC  
UIMC1 INO80B  
GTF2E2DNM2  
AXL GAS6  
SETD1A USF1  
IGF1 IGSF1  
PGR DDX54  
LCN1 LMBR1L  
TRAF5 NGFRAP1  
VHL RAB35  
A2M NCDN  
GIPC2 FZD3  
MAD2L1 MAD1L1  
SMAD2 RPS27A  
YWHAQ YWHAE  
A2M MAST1  
GNAI2 MAP3K3  
IDH1 ZHX1

ARF1P1 GGA2  
ARF1P1 GGA1  
MCM7 PELO  
CHEK1 MSH2  
POLB XRCC1  
NUP93 PRKAB1  
PTPRZ1 GIT1  
PSMD11 PSMD14  
RPA1 RECQL  
PRKDC IKBKG  
TCAP MDM2  
E2F4 LIN9  
CCNB1 UBQLN1  
MYF5 CSNK2A2  
EIF2S1 EIF2B4  
NCOR1 TCF12  
NTRK1 FBL  
SNCA CSNK2A1  
PIN1 THRAP3  
FAS CASP8AP2  
CRMP1 TFG  
PSMC5 NFKB2  
POLD1 POLD2  
APP GPC1  
TAGLN2 PSMD6  
POLR1E RRN3  
GNAI2 TTC1  
EGFR EPN1  
DRD5 NCS1  
UNC5C DAPK1  
KCNA2 PTPRA  
FASLG SH3PXD2B  
ETS1 SV2A  
OGDH USP13  
NPHP1 MED28  
STAT1 GNB2L1  
CUTA MCC  
TXNIP SMURF2  
PCBD1 HES4  
PTPN11 BTLA

MSH6 BARD1  
RRM1 ATM  
KCNA5 PTPRE  
DVL2 RBPMS  
ETF A MCC  
XRCC5 ORC2  
XRCC5 ORC1  
STAT1 UBE2I  
ZSCAN30 SUFU  
RGS1 MAP3K12  
GOT2 MPG  
UBC UBE2B  
CDK5R2 CAMK2A  
CTSA CTNNBIP1  
YWHAQ NIF3L1  
VAV2 TCP11  
ALDOAYWHAZ  
XRCC5 XRCC4  
TSC22D1 HIGD1A  
AKR1B1 DST  
GP1BA YWHAQ  
RAC1 NCKAP1  
DNAJB1 HSF1  
HSPA1B PACSIN3  
EP300 CDT1  
CUL1 FBXO25  
TNP1 PRKACA  
USP30 CLPB  
ERH MED31  
XRCC6 CD40  
TIMM44 RAC1  
SH2B2 GRB2  
TNFRSF4 TRAF2  
RBL1 TRIP6  
GIPC2 IGSF21  
ABCE1 RNASEL  
USP14 UCHL5  
PLD2 ACTN1  
SLBP LSM10  
REST CDYL

CSNK2B TAF1D  
SF1 RBM17  
ARF1P1 ARHGAP21  
RBL2 RBBP8  
PYCRL UIMC1  
RPL22 CSE1L  
TOLLIP IL1RAP  
ELP2 ELP3  
MED10 CDK19  
RB1 TBP  
TGFB1 BMP3  
ALDOADYNLL1  
UBE2I HNRNPD  
ZNF211 NDEL1  
LMNA UNC13D  
KHDRBS1 FYN  
SKI PRDM16  
FN1 RAG1  
TGFB1 BMP2  
HEXDC ADPRHL2  
SUV39H1 CREBBP  
MARS MAP3K3  
ABCA1 SNTA1  
WDYHV1 DCTPP1  
ABCA1 SNTB2  
BRAF PRKACA  
ITGB1 HSPG2  
CASP3 SLK  
ACTL6A KAT5  
F2RL2 CTSG  
JAK2 CCR5  
USP14 SRPRB  
ZC3H18 OSBPL10  
CDKN1A CDK6  
CLOCK PER3  
CDKN1A CDK5  
CHN2 RAC1  
APP PRSS3  
RHOA CRMP1  
NUDT5 PRKAB1

XPO1 CRK  
PAFAH1B3 LNX1  
NECAB2 VTA1  
FAM160A2 HOOK1  
GTF2F2 PITPNA  
YWHAZ BSPRY  
HDAC4 BCORL1  
VAMP3 DDB1  
PLSCR1EWSR1  
BID MCL1  
SUV39H1 HDAC2  
JAK2 STAT5B  
YWHAG HIVEP3  
MAX CTR9  
WRN WRNIP1  
FLNA TRAF2  
RPS27ADDB2  
STAT1 CEP250  
MDFI ZNF408  
PFN1 ACTA1  
TUSC2 LRBA  
TTK TUBB1  
PCNA SEC23IP  
NFKB2 NFKBIZ  
VCP MAP3K3  
ATP2B1YWHAE  
RELA CREBBP  
WNT1 SFRP1  
GSK3B ACLY  
ZNF397 ZNF396  
PLIN3 RHOBTB3  
CDK2 CDT1  
PARK2 LRRK2  
HERPUD1 STARD9  
CASP7 DCTN1  
MED1 THRAP3  
SGTA SRGN  
HAT1 G3BP1  
KRT1 MBL2  
S1PR2 GNAQ

CA12 MRPL9  
EGFR NUMBL  
TGM3 CALML5  
DRD4 CLIC6  
YWHAG PPM1G  
SRSF4 SRRM1  
UBL4A MAP3K3  
C21ORF77 IKBKG  
TCF3 MAPKAPK3  
KCNJ4 DLG1  
BRCA1 SMARCB1  
STAM2 UBE2H  
POLG SSBP1  
USP19 CANX  
RELA NCOA6  
SHANK2 BAIAP2  
PRDM1 PRMT7  
PIN1 KLHL20  
RELA HDAC2  
MARK3 YWHAG  
DYNC1I1 NDEL1  
AGFG2 EPS15  
FHL3 RFX6  
PHB SKP2  
POLD1 GRB2  
ITPR3 TRPC4  
CELF3 RBFOX1  
MED1 MED16  
NUP62 ARFGEF1  
VHL HIF1AN  
ATG7 MAP1LC3B  
RELA PDCD11  
PPP5C CRY2  
IL32 PRTN3  
TXN CD40  
CDK2 FAM113A  
TUBB NFKB2  
EIF4E LRPPRC  
NUP62 THAP1  
HAAO GAD1



ZNF24 SCAND1  
BMPR1B RHEBL1  
ACP1 FNBP1L  
CTR9 PAF1  
RELA TAF4B  
BAG3 HSPA4  
SKIL NID2  
PLCB2 TRPM7  
MYL2 TRIM63  
PSMD11 PTN  
NUP93 PHLDA3  
PIK3C2B ERBB2  
PDHX EWSR1  
CCT5 PPP4C  
MYL1 EPB41  
RNF34 UBE2F  
HMG20A GTF2A1L  
CSTA PI3  
CAD PPP1CA  
HIST1H3J MLL  
RPN2 GSTK1  
PSEN2 RAB11A  
OTUB1 DDX24  
CSK ID3  
GTF2H1 PSMC2  
SLC38A1 SEPHS1  
EIF3F EIF4A2  
UBC CKLF  
BAG6 IMMT  
GRK5 SNCA  
SOCS1 VAV1  
F2RL2 JAM3  
STRN4 WIP1  
CSNK1D CDK5  
RBP1 HDAC2  
AP2B1 NUP54  
HLA-B RPS14  
PSMB9 NCOA1  
PML FOXO1  
SMAD2 EIF3L

HNRNPUL1 NXF3  
IPO8 ATXN1  
FAS C14ORF1  
PSMD12 GH1  
FBN2 LTBP1  
MET YWHAZ  
HDAC3 NR2C2  
RELA IRF3  
BRAF YWHAG  
SRC FOXO1  
ARHGAP8 BNIP2  
PLSCR1SMCP  
SOD1 RNF19A  
TP53 SERBP1  
TUBB HDAC6  
SEC22BVHL  
DSPP IKBKE  
WNT1 WIF1  
DLG4 NLGN3  
PLSCR1CNTFR  
PPARGC1B ZNF182  
ESR2 CREBBP  
CUX1 MAX  
DDIT3 C14ORF80  
APOA2 APOC1  
HIF1A TSGA10  
RGS4 CALM2  
PA2G4 IKBKG  
HLA-B RPS21  
CASK LIN7B  
SYK PRKD1  
OFD1 ITGB3BP  
SNTB1 DTNA  
PPM1B CDK2  
CASP7 IKBKE  
PPP1CASYTL2  
DLST SCFD1  
PLAU HGF  
STAT1 CPSF3  
PRNP MOG

G3BP1 DHX40  
DNAJC7 MKNK1  
UBA5 PA2G4  
PRPF40A HTT  
POLR3A PKP2  
EIF3G USP3  
DAP3 FADD  
MCM6 MCM8  
UBE2D2 DTX3L  
SEC11AC2ORF18  
MCM6 CRLS1  
HNRNPK SF3A2  
HNRNPK SAFB  
PSMD2 INSL6  
LCK PTK2B  
HDAC3 ANKRD11  
HDAC3 ANKRD12  
RRAS SRC  
TP53 DAXX  
TP53 PPP2CA  
AP1G1 ARF1P1  
TFRC HFE  
SLC9A3R2 SLC22A4  
MYC KIAA1524  
PNP HLA-B  
TXNDC9 GIT1  
CUEDC1 IKBKG  
TNFRSF10B CASP8  
CHD1L API5  
TULP1 NCK1  
COX5A TMBIM4  
NASP ULK2  
RXRG NR1H3  
MAGOH THOC4  
SIAH1 CACYBP  
UBE2N ZNRF3  
ERBB2 VAV3  
DVL3 TNFAIP8L1  
ARCN1 TSC22D1  
FLT4 PTK2

PODXL SLC9A3R2  
PLEK ACVR1  
CCBP2 CCL5  
MTPN RELA  
CCBP2 CCL2  
IPO8 TRADD  
CHM RAB1A  
PIIP5K2 MEF2D  
SETDB1 FLYWCH1  
TRAF3IP1 SNX6  
CEBPD IPO4  
CDC42 TRPS1  
DAB2 APLP2  
TCF3 TAL2  
USP11 SEC61A1  
HOOK3 VPS16  
UBQLN4 TNRC6B  
FBXL18KRTAP4-12  
HSPB3 C7ORF64  
A2M EXOSC1  
MAD2L1 ANAPC2  
OMA1 SIAH1  
PRKG1 MRVI1  
CDT1 BAZ1B  
SNAP23STX1A  
MED26 MED28  
TUBB TRAF2  
MYBL2 NCOR2  
AIRE NASP  
ANTXR2 RPS27A  
RAB7A RAB17  
TP53 CREB1  
RXRB NR1H3  
MATN2MATN1  
TCP1 CCT8  
TCP1 CCT4  
MYC TUBA4A  
EPHA2 EFNA4  
EPHA2 EFNA3  
AR EP300

CIT RAC1  
AKT1 STK4  
SF3B4 SF3A2  
MUC1 GALNT1  
MUC1 GALNT2  
PARP1 GTF2F1  
PSMB1 PSMB7  
EPOR GRAP  
RET GAB1  
AKT1 SH3RF1  
DLG4 PTK2B  
POU2F1NCOR2  
PSMB4 PSMB5  
DFFA HNRNPL  
S100A9 ARRB1  
TPM2 TPM1  
LNX1 MAGEB18  
SET CKLF  
TRO USP7  
TP73 PAX6  
INADL CACNG2  
UBTF TAF1B  
ENAH TES  
CGA FSHB  
ZNHIT2RUVBL2  
BID BAX  
KIF5C YWHAQ  
CGA LHB  
BID BCL2L1  
DAND5 AHR  
UBE2I TRIM29  
CGA TSHB  
SLC38A1 GBP2  
KIF11 IKBKE  
CALM2 CAMK1  
DNAJB1 FANCC  
IRAK1 NLRP12  
CRHR1 GNAI1  
SS18L1 ELF5  
YWHAQ SH3BP2

JUP PTPRK  
MYOD1PABPN1  
ESRRA PPARGC1A  
MAPK6 TMEM2  
HIST1H3J EHMT1  
CTBP1 KLF12  
HLA-B B2M  
ATF2 CCDC6  
UBE2I IKBKE  
RIPK2 CARD6  
DCC RPS23  
S1PR1 AKT1  
CDKN1B RHOA  
ATP7A PDZD11  
GJA1 CAV1  
POLR2B MED28  
CCNB1 FZR1  
PCNA DMAP1  
YWHAG LRP1  
TOB1 SMAD9  
GATA2 ZFPM1  
YWHAG SRSF1  
RNPS1 GEMIN5  
EP300 INGX  
GNB5 MVD  
NCK2 WIPF2  
ATR ARHGEF1  
LRRC59 TRAF6  
PSMD12 FTSJ1  
RPS3 NDRG1  
TGM2 HIST2H2BE  
GRB2 ASB16  
ABL1 ACAP1  
APIG1 APIAR  
HMGA1ELF1  
WWP2 DIDO1  
APBB1 NONO  
ACTG1 NFKB2  
HLA-B SEC23A  
TSC22D1 POLDIP2

CRY2 TIMELESS  
IKBKAP TTR  
MAPKAPK2 YWHAZ  
KIF1C CSNK2A2  
MYOM1 TTN  
DYRK1A CLASRP  
DNM1 ITSN1  
LPAR2 ARHGEF12  
YWHAB LARP1  
ABL1 SNX17  
AQP1 MDFI  
GRB2 NAP1L5  
BCL2 PSEN1  
YES1 PAK2  
SNRPD1 WDR77  
ID3 ZNF408  
PDE6D GRK1  
ATXN1 VSTM2L  
MAP1LC3B LUC7L2  
ESR1 PPP5C  
PTPRD MDM2  
ATXN1 ZNF488  
NDN DHCR7  
COL4A2 SKIL  
CP LTF  
GTF3C1RBM23  
DDOST ARF6  
TSC22D1 GSTK1  
TLX3 HOPX  
GRIA1 LGALS12  
ACTG1 MAP3K14  
TP53 S100A1  
RPS16 MAP3K3  
GOLGA2 RAB33B  
RDX GNA13  
VHL PTGES3  
SUMO1 PPM1J  
IGF1R YWHAG  
MAPK3 DUSP9  
KPNA4 TGM2

CBX4 DNMT3A  
AKT1 IRS1  
RPL10 PSEN1  
GAP43 ELAVL4  
ZFR RPAP1  
NFASC SCNN1B  
RPS27ARNF2  
OTUD5 CACYBP  
COLEC11 UBL5  
NFKB2 HNRNPU  
HSPA4 STUB1  
EGFR CSRP1  
YY1 MDM2  
SLC38A1 HIF1A  
CRX RAX2  
BRCA2 BRE  
MED21 TCEB3  
UBE2K DTX3L  
CDKN2A ACTR3B  
HLA-B DRG1  
IGF1R SRC  
KIF5B PCBD1  
RAD17 ALK  
HSP90AB1 RELA  
WEE1 SMAP2  
CRK DOCK3  
CANX GRIA1  
VAV2 TTN  
MED1 MED31  
H2AFX RAD51  
NBL1 BAG6  
MED12 MED28  
MEN1 RPS27A  
PTPN12 ZFP2  
NFE2L2 EIF2AK3  
PSMB1 EXOSC6  
RGS20 CRK  
TIMP2 MMP14  
HLA-B VDAC3  
MAP1LC3B ANKFY1



RAD1 HUS1  
CCR4 CCL17  
RBBP7 ASF1B  
DDB1 MAFB  
SRC STAT3  
TTR GOLGA2  
TEK DOK4  
PDCD6 PLSCR3  
PLXNB2 ARHGEF12  
ZNF251 FEZ2  
CBX5 H3F3B  
UBE2W TRIM17  
PRKACA RELA  
DNAJB1 BRMS1  
SMAD2 ZFP106  
FLNC SMURF2  
GRIN2A PTK2B  
FOXG1 FOXO4  
CLTC PTK2  
RAB27A SYTL2  
SEC63 PHLDA3  
PPP6C IGBP1  
SOS1 PACSIN3  
TXN TMBIM4  
MDM2 MEA1  
CALM2 YWHAE  
UBE2D2 RFWD3  
MDM2 STX1A  
JAK2 PLCG1  
ABCD1 PEX19  
MYF5 CSNK2A1  
HDAC2 DMAP1  
SPINT1 ST14  
HNRNPA1 RBM39  
TCEANC IKBKG  
HNRNPD SAFB  
HSPA4L TIMP2  
TNFRSF13B CAMLG  
TGFB2 SMAD4  
PHYHIP HDAC11

BCL2 CDK2  
RRAS2 RASGRF1  
RPL30 MAP3K1  
LMNB2 TOLLIP  
FYN PTPRZ1  
JAK2 SIRPA  
CDK4 UBXN1  
TIAM2 PARD3  
RAC1 CDC42BPG  
GPC1 FSTL1  
NPM1 MAP3K14  
GNA13 S1PR3  
GNAO1 NUCB1  
MAP4K4 RTN4  
WEE1 PIN1  
PIK3R2 TEC  
DNTT PRPF19  
FYN PTPRE  
SMAD2 DPP10  
OMA1 PAFAH1B1  
SETD1A MYB  
NFKB2 ILF2  
NCOR1 RDBP  
NCAN TNR  
CHML RAB1A  
FOS EP400  
SLC38A1 C14ORF1  
CENPB OPTN  
NCOA2 CREBBP  
MED7 MED1  
MEN1 JUND  
NPM1 NSUN2  
VOPP1 TAC3  
RAD17 FZR1  
EMD TBL1XR1  
EPB41 RPL38  
JAK2 GTF2I  
FANCD2 FANCI  
PIK3C3 KIAA0226  
RIPK4 PRKCD

CLEC1B NINL  
SMARCA4 MED17  
HCK SPRR2A  
ADAM10 PDIA3  
ARAF KLHL12  
DEAF1 GSK3B  
SEPT8 SRRM2  
DEAF1 GSK3A  
EVI5 PLK1  
EPB41 DYNLL1  
DNAJB1 PSEN2  
PVRL2 PICK1  
NFYA PWP1  
RRM1 INSL6  
PTS FNDC5  
DAB2 SMURF2  
SMAD7 SOX13  
TRDMT1 COPS6  
ATP5I SMAD2  
ALDOAPLD2  
EP300 GATA5  
COPS6 CHRN1  
CDK1 EIF2AK2  
INSL6 PLEKHA4  
PVRL2 PVRL3  
CRYAACRYZ  
FAS FEM1B  
MSH2 BARD1  
GHR IRS1  
MDM2 HIF1A  
UBQLN4 NXF1  
HMGB1 CEBPB  
RNASE4 ACTC1  
EED KDM5A  
CDK5R1 CDK5RAP2  
TUBB SMC3  
NPM1 PRMT2  
RPS16 CDC5L  
UNC13B RIMS1  
RDX DRD3

FLNC WIP12  
TRIM25 UBE2J2  
EIF1B RAB7A  
RAD1 RPA2  
TRAF3 EDAR  
CALM2 FKBP8  
TP53 H2AFX  
MMP20 ACAN  
STK11 WDR6  
AR ZNF318  
HOXD3 ALX4  
RB1 PAX5  
UBE2WRNF114  
SMAD2 TP63  
RPS27AIL1R1  
RRAS2 RAPGEF1  
RAB3B SMAD4  
STXBP3 STX4  
BMP6 CHRDL2  
EXOSC4 EXOSC1  
EXOSC2 EXOSC5  
TAF11 TAF2  
DDX20 LSM2  
RAC3 ANKRD11  
COX6C TH1L  
PIK3C2B EGFR  
STXBP1 CDK5R1  
NR3C1 CLIP1  
GNB2L1 LRP12  
MYL3 CASP3  
LSM6 LSM4  
MT2A GPR50  
CASP8 BFAR  
RNMT RRGTT  
TNFAIP3 TRAF6  
EPOR CBL  
CDC27 SMAD2  
IFNB1 IFNAR2  
KPNA1 NUP54  
PEX14 PEX19

ROGDI KIAA1377  
F13A1 F2  
CUL4B WDR82  
PTPRS UNC119  
SMAD2 LEMD3  
TGOLN2 PPP1R9B  
KIAA0240 DTNBP1  
SPATA2 TRAF2  
LCK PTK2  
TRIM65 UBE2Z  
MCC LRRC59  
EXOSC9 EXOSC7  
PTP4A3 EFTUD2  
SMARCB1 HDAC2  
MAPK7 MEF2D  
SMAD1 RASD2  
PPAT RPS6KB2  
DNMT1 CBX1  
PTPN3 YWHAZ  
HAX1 YWHAQ  
ANXA1 TGM2  
HLA-B RUVBL1  
YWHAG TRA2B  
NUP107SEH1L  
NFKBIA G3BP2  
PEA15 PLD2  
PRNP TBPL1  
YWHAG RPS27A  
HNF4A MED1  
HNF4A ZNHIT3  
TLR2 EGFR  
MTA2 SATB1  
CALCOCO2 SMARCD1  
CDK4 CDC37  
QPRT SUFU  
PCDH17 MYB  
SMARCB1 CREBBP  
FOXP4 FOXP2  
CBL LCP2  
NFKB2 TUBB6

KIAA1967      MAP3K3  
H2AFX DHX30  
PTP4A3 RAB3GAP1  
EXOSC7      UBE2Q1  
CALR SCARF1  
MED7 MED31  
HLA-B RUVBL2  
SEPHS1 C2ORF18  
SMC4 IKBKG  
SLC25A21      OAZ1  
DLST RUSC2  
ZNF101 MDFI  
RPS6KA5      RELA  
PFKM PFKL  
MAP2K7      ARR3  
TTR DDR1  
FADD CASP8  
SOCS3 GHR  
UBQLN4      DKK3  
FLT3 CBLB  
APOD STK24  
POLA2 HELB  
TGM2 RHOA  
IL6R WWP1  
MYOC GGTL1  
TP53 ELL  
ZBTB3 ZMYM2  
WBP2 MAGI1  
PAX6 DYNLL1  
KITLG CLEC11A  
MUC1 OSGEP  
MYOD1 EZH2  
TSC2 YWHAZ  
FANCA FANCB  
ANP32A      KPNA1  
LGALS1      GEMIN4  
PCBP1 UGP2  
FYN PIK3R1  
INHBB IGSF1  
NBN ATM

TLE2 EMX2  
PLA2G1B PLA2G2A  
NCK2 UBC  
KIT CD9  
NKRF REL  
HNF4G COPS5  
TAL1 EP300  
PPIG RNPS1  
SUV39H1 PRAM1  
TP53 NQO2  
APC LRRCC1  
GRB2 VPS13A  
SYNJ1 EPHB2  
RPA1 MCPH1  
CD22 POLR2B  
ICAM1 ITGAL  
PLD2 AQP3  
GABARAPL2 ATG16L1  
NBN PRKDC  
AGBL2 TP63  
NOTCH2 SMAD1  
FURIN PACS1  
CSNK2A2 TGFBR1  
CNBP APOBEC3C  
HNRNPA1 MRPS27  
LRSAM1 UBE2D4  
ZNF638 WWP1  
MEF2C EP300  
PSEN1 ECSIT  
EGFR UBASH3B  
MTA1 TH1L  
ACTL6A EP400  
MIP GJA3  
PTPN6 LCP2  
PIK3R1 SHB  
COPS6 C1ORF174  
ETHE1 TP53  
CDC45 MCM4  
CDC45 MCM7  
GRAP2 BLNK

HDAC4 MEF2A  
FYN CSMD2  
SSBP4 IL1F5  
LRSAM1 UBE2J1  
SHMT2 DEPDC1B  
THBS2 THBS3  
RAB6A CHML  
SNX4 EGFR  
USP11 KLHL13  
PTPN9 RTN3  
NUAK1 S100A8  
MAPK7 GOLGB1  
ERBB2 MAPK8IP1  
APBA3 BCR  
CCT5 TBC1D17  
ID1 TCF12  
BAG6 NDUFA6  
DPEP3 DPEP2  
TRIP13 COMT  
MYBL2 CDC34  
CRK ABI1  
RELA CDK5RAP3  
ATF7 MAPK9  
SAP30 SIN3A  
MYB UPF2  
HNRNPA1 PHYHIP  
GRB2 NR1H4  
C16ORF70 KIF17  
PLEKHA5 AFG3L2  
KDM5C MAX  
INSR PIK3R3  
EIF2S1 EIF2S2  
PGR NCOR2  
XRCC5 POLR2E  
TOP3B CHIC2  
LSM6 LSM5  
ARRB2 CXCR4  
CSNK2A2 CSNK2B  
FER CTNNB1  
SETD1A HCFC1



ANAPC5 ANAPC2  
SRP72 PLEKHA5  
ANAPC5 ANAPC4  
DCTN2 TSG101  
TAF4 TAF10  
NR4A1 MYT1L  
ETS2 EP300  
EGFR DOK4  
NEK9 NEK6  
NFKB2 TUBB2B  
DDX3X WBP4  
EPOR GNB2L1  
STAT3 NLK  
SERPINB9 UBR1  
PRPF40A PSG5  
APOA1 PCMT1  
TERF1 PRMT1  
KPNA3 TGM2  
PRPF40A NONO  
THRA YWHAH  
DDX3X IKBKE  
ZNF440 MDFI  
RPS20 UBE2O  
KIAA0776 UBE2E1  
SUMO2 MDC1  
DYNLL2 EWSR1  
PNRC1 POLR3F  
RB1 DAND5  
MSH5 ABL1  
CCNE2 CDKN1B  
EIF1B SET  
PLEKHA5 LSM4  
SMARCB1 KAT2B  
APP DAB2  
FURIN SORL1  
KIT PTPN11  
UBE2D2 RNF43  
MED24 PPARA  
LILRA3 EWSR1  
CTNNB1 PTPN14

PTPRZ1 CSK  
FHL2 SMURF2  
PGR UBE3A  
IGF1 IDE  
GNAI3 TRAF6  
RNASE4 FST  
ATN1 DMPK  
BRAF TERF1  
COPS6 DIS3L2  
SMAD2 TAF3  
MRTO4 TRAF6  
UBE2M DCUN1D1  
TUBA1A VPS4A  
RAB3A RAB3IP  
PSEN2 PDCD4  
GRB2 PANX2  
SMAD9 DNAJC7  
NAA16 SMURF1  
DDIT3 SSX3  
IFRD1 HDAC4  
HDAC3 PPAR  
PCNA TSC22D1  
COL1A1 THBS1  
LXN PANK2  
IKBKE TBKBP1  
LIPF PSEN2  
CSNK2A1 KANK2  
MAP3K7 KIF26A  
UBE2E1 RNF14  
RFXANK C20ORF24  
CBLB RNF11  
WHSC1 AR  
MPP3 SCN2A  
UNC13B STX2  
NR2F2 BCL11B  
SUFU NCOA3  
SLC7A9RBM39  
STAT5A EP300  
EIF3H CSNK2B  
FLOT1 BBS7

ITGAM CD209  
BRD1 FEZ2  
EFR3A TSC22D1  
SIN3B REST  
SF3A2 SRRM2  
IRF2 NFKB1  
VAV1 PAG1  
SERPING1 SELE  
MYC ARMC6  
GRB2 AP2B1  
TJP1 CTTN  
TBP ABT1  
PSTPIP1 MED28  
CTNNB1 TRIP10  
ZBTB7B SP3  
NFKBIL1 MRPS18B  
SEPT4 PARK2  
PSPH PRMT1  
RPL23 RELA  
TMED2 GORASP2  
SGK1 NEDD4L  
RELA BHLHE41  
PSMD2 UNC119  
SMC3 MAGED1  
ITCH SNX18  
SH3GL2 SH3GL3  
LTBR LTB  
MED26 MED20  
PCBD1 NIF3L1  
PHB CLN3  
TRAF2 LZTS2  
CDK4 GEMIN4  
TCEANC RAD54B  
CSTA IVL  
TGFB1I1 ITGA4  
RBBP7 APPL2  
PIK3CAAPPL1  
LRSAM1 NINL  
BRCA1 ZCCHC8  
EGFR PTPN12

PRKD3 BCL6  
DDB1 DCAF6  
TBP TAF1  
COLEC12 EXOC1  
FYN CELSR3  
SUMO1 C20ORF27  
DPYSL4 SH3GL3  
EMILIN3 ASH2L  
CPNE4 CPNE1  
SMAD2 STRAP  
ANAPC7 FZR1  
ERBB2 SH2B3  
APC ARHGEF4  
EDN3 KEL  
MAGI3 NRCAM  
HNRNPA1 ZFR  
RAB25 D2HGDH  
INADL CRIPT  
NCOA2 DDX17  
PSMC3 PSMC5  
FGG F13B  
PPAP2BBCAR1  
PMPCA BMPR2  
FBP1 ACTN1  
TERF1 STAG1  
CD81 TRAF6  
RAB5A RAB37  
TP73 TPM3  
GRB2 TRAT1  
MGRN1UBE2G2  
RBL1 E2F5  
WASL SNX9  
FAM107A CCDC85B  
USF1 EP300  
RELA IKBKE  
FGG SERPINA5  
BMP7 ACVR1  
CTSB MLH1  
RHOQ CDC42EP1  
ELK4 MAPK7

SMAD2 EID2  
CRKL MAP4K5  
PAX6 PROX1  
MAPT PPP5C  
CAPN1 ECHS1  
MDM4 CASP3  
KRTAP9-3 CDK12  
EEF1A1 FAS  
ITGB1 LYN  
IPO5 MEPCE  
CACNA1C RYR2  
SPECC1L RIPK3  
PPM1B IKBKG  
SEC31A APC  
VCAN FBLN2  
MAPRE1 COPS8  
SYK ERBB4  
FYCO1 GABARAPL1  
IGF2 IGFBP2  
MLH1 FSCN1  
EGFR C4ORF49  
IFFO1 XRCC4  
H1FO IKBKG  
WASL SH3GL3  
TP53 MKRN1  
PCID2 BRF2  
NTN1 UNC5B  
PCNA IL17RB  
APBB1 SF3B4  
SRPX2 ADAMTS4  
APBB1 SF3A2  
APC RBM4B  
DYNC1H1 SMAD2  
PCBP1 ZNF384  
BZW1 BZW2  
YWHAQ KLC2  
RIPK2 ENO1  
PAK1 BAD  
GYS1 GYG1  
CSNK1G2 COL4A3BP

SSSCA1EIF3L  
CDC73 KIAA1549  
DAND5 NCK1  
CNTROB LYST  
TUBB2A PAFAH1B3  
EGFR DOK6  
NCK1 MINK1  
BECN1 PIK3R4  
GRAP2 BEND5  
RBBP5 DDB1  
ESRRA HIF1A  
OXA1L MRPL51  
MAPK1 RGS19  
CHRM2 GNA11  
DNMT1 SETD7  
NOL3 PNKP  
HMGA1PRKCA  
RPS27AACVR1  
HIRA CABIN1  
COL4A1 DCN  
MICALL1 PACSIN1  
JUND SEPT2  
LCK PLCG2  
TYK2 IRS1  
INPPL1 ABI1  
APOA2 PLTP  
ATOX1 FKBP4  
LGALS3BP TBK1  
EBI3 MDFI  
CUBN LGALS3  
LRRC68 ZMYND19  
TNFAIP3 RNF11  
SHC1 STAT5A  
EPOR STAT5B  
HEATR2 PHLDA3  
TNKS POT1  
RAB11FIP3 ARF4  
MEPCE ZFR  
MAD2L1BP INSL6  
NR2F6 HSBP1L1

HIST1H4I HDAC8  
IQGAP1ARF6  
TUBB4 KHDRBS1  
HAX1 EIF3F  
HNRNPC CSNK2A2  
MAPRE1 KIF2C  
PIK3CAATPIF1  
AP1G1 RABEP1  
HRAS BRAP  
EP300 PLAGL1  
NEK2 CEP250  
PRKCH NUMB  
LSM6 USP15  
TANK LARS  
MRAS RAPGEF6  
NDC80 CENPB  
SORBS3 RARG  
EIF3A PRKAG2  
GTF2F2 ESF1  
FYN MAP2  
PIAS2 MYC  
MAPK3 SREBF1  
RAB3GAP1 WDR7  
PGD IKBKE  
LCK PTPN12  
PAK4 YWHAQ  
APBB1 SF3A1  
OMP BEX1  
ZFR MKNK1  
GFI1B BEGAIN  
DAZAP2 LEF1  
USO1 C1ORF94  
IMPDH2 TNFRSF10D  
SYT7 SYNCRIP  
STK11 MARK4  
DTYMK MEPCE  
STAT3 MAPK8  
HTR1A HTR1D  
WDYHV1 HSD17B14  
HTR1A HTR1B

WDR20 FBXW5  
CANX SMURF2  
SNRNP70 GSK3B  
MED10 MED18  
PPP1R3D PPP1CC  
ARRB2 DDX27  
CEP55 POM121  
CTNNB1 NCOA2  
CDKN2B KIAA1377  
EGFR ATP1A1  
CSN2 NEK8  
EGFR ATP1B1  
IL7R JAK3  
GGA1 BACE2  
TRA2B RNPS1  
SRSF2 SRSF11  
CUL3 KLHL12  
APP HSPG2  
HNRNPD PCBP2  
FXR1 CYFIP2  
CUL4B DCAF5  
HNRNPD PCBP1  
FOS DDIT3  
ANXA1 TRPM7  
TYSND1 JOSD2  
KEL EWSR1  
EEF2 MLH1  
SMAD2 RHOJ  
TOP2A BRCA1  
PGR CUEDC2  
GNA13 MAP3K5  
HIST1H2BG DDX56  
TBK1 TBKBP1  
NUMB SIAH1  
MAPK4 GAB1  
MRPS14 PINX1  
EIF3G ARF6  
IRF3 MAVS  
RPA2 FANCM  
SUPT7LKAT2A



CCDC85B PBXIP1  
RPA2 PRKDC  
TRIM29MID2  
FAM13A RAPGEF2  
GPSM1 USHBP1  
ANAPC7 ANAPC5  
ANAPC7 ANAPC4  
RSL1D1RRP1  
A2M PAXIP1  
HARS GLRA1  
NCK1 WNK1  
FOS NCOA6  
SEC23AMIA3  
NBN SUMO2  
RPS6KA1 NR4A3  
IPO5 RPL7  
HSPB1 ILK  
BMP5 CHRDL2  
RPS6KA1 TSC1  
CIRBP PRMT1  
PRKACA PTPN7  
SF3B1 DYRK1A  
PSMD14 PSMD13  
DAPK3 PRKCZ  
GNB2L1 TSC22D4  
PICK1 SACS  
MYH10 YWHAE  
MYB ASH2L  
SYK NFAM1  
PAX2 SFRP2  
SERPINF2 TGM2  
RELL1 RELT  
CCDC85B DTNB  
SOCS1 IFNGR1  
SYK RPS6KA2  
CUL4B RFWD2  
PTTG1 TP53  
AIP EGFR  
JAK2 EPOR  
ME2 WNK1

CDK5 C1ORF61  
HSPA5 NFKBIA  
TCF3 ELK3  
SSSCA1RUVBL2  
SMAD6 SMURF2  
LRG1 FN1  
ABCD4 DLEU1  
MYB NLK  
NCKIPSD BAIAP2  
PAK1 ARHGEF2  
SGK1 OLA1  
APEX1 EP300  
HDAC3 CEBPD  
MAP4K4 ZRANB1  
WASL ITSN1  
POLR2C WHSC2  
CANX TRPV4  
SIX5 EYA3  
RPS16 MAP3K14  
RAB3A CHM  
AVPR2 GRK5  
GABRR1 PRKG1  
HDAC3 REPIN1  
CACNA1S RIMS2  
MAN1A2 FOS  
PLK1 RPS27A  
PSMB3 IKBKE  
FOS ZFP91  
SUPT3H SUPT7L  
HCFC1 SIN3A  
APBB1 THRAP3  
APBB1 WBP11  
ATG7 GABARAPL1  
STATH PROL1  
RAD50 DCLRE1C  
STAT5B STAP2  
NUP214HDAC4  
RUNX1T1 WBP11  
CD7 PIK3R1  
GTF2A1 CNOT1

MED1 TRRAP  
RANBP10 TSEN2  
GTF3C1GTF3C4  
SLC9A3R1 PDGFRA  
HEATR2 MAGED1  
SOX8 UTF1  
WDR5 TRAF6  
RIPK2 HNRNPA3  
INSR CBL  
IFIT5 RNF32  
PSTPIP1 TUBB  
CDK9 HNRNPD  
CD177 EWSR1  
THRB MED25  
MAP3K7 CARD11  
CNOT1 CNOT8  
ISL1 LDB1  
PARK2 AIMP2  
FAM107A NINL  
TPT1 SNX6  
TRAF2 GCKR  
MAPK8 PRKDC  
RHOB TNFAIP1  
SMAP2 MCC  
CDK9 CKAP5  
CFD SERPINF2  
BTK EWSR1  
KRT36 TWF2  
PRPF40A HNRNPU  
YWHAG KIAA1598  
HSP90AB1 HIF1A  
MTPN REL  
YWHAQ RGS7  
KIF22 IMMT  
CHRNA4 YWHAH  
ZMYM6 CDK9  
DDX3X EIF4A2  
ANKRD23 TTN  
LRPPRC GSTK1  
ARRB1 MAP3K5

PARK2 GRIN2B  
XRCC6 LIG4  
SH2D1A EGFR  
RSRC2 UBQLN4  
AES MAPK14  
NUAK1 RPS27A  
HNF4A NCOA2  
FYB ABL1  
NPTXR NPTX1  
FLNA TLR10  
ENAH ROBO4  
ID3 PRDM14  
LTA4H UBA5  
FLT4 GRB2  
PRKDC RIPK3  
CEP290 PCM1  
ATG7 ATG10  
UBE2D3 TRIM35  
PABPC4 IKBKE  
XPO1 CLN3  
CDK14 CCNY  
ITIH4 DNAJC1  
RPA1 HELB  
RPN1 HLA-B  
NR4A1 VHL  
BCR COPB1  
SMARCA2 RUVBL1  
YWHAG KLC4  
VOPP1 PBK  
LRP2 GIPC1  
FGR NCOA6  
NR3C1 MED25  
MCC VARS  
MCM4 ORC2  
MCM4 ORC1  
SMAD2 ESF1  
RPS20 MAP3K14  
MAPT PSEN1  
NPM1 RPS27A  
ZMYND10 TSC22D4

CNNM3MDFI  
NUDT14 RAF1  
SYCP2 ACOX1  
NCOA2 TXNRD2  
RND2 VPS4A  
DNAJA1 UQCRC1  
DRD5 GNA13  
GTF2F2 CEBPG  
NPM1 GRB2  
FOS PKNOX2  
TIFAB TIFA  
BPTF KEAP1  
CDK2 FZR1  
KDM4ARB1  
TERF2 ORC6  
KPNA3 ARRB1  
FNTA HDAC6  
PSTPIP1 RPL28  
KAT5 KIAA1377  
XRCC6 MRE11A  
HNRNPR FYN  
HIBADH TRIM63  
RAD51 BARD1  
ARAF TOLLIP  
TAC1 ARHGEF40  
MCC TARS  
GTF2A1 TRIP4  
RPGR KIFAP3  
G3BP1 HDAC6  
VAV2 SRRT  
MAP2K6 STAT4  
APC PTPN13  
HCK DOK1  
CCAR1 SMURF2  
TERF1 CDC6  
PAX6 SMARCA4  
MDM2 MTBP  
HTR1F CAV1  
RAMP3 HSPB3  
MCC PYCR2

EFHC2 TUBGCP4  
SUMO1 OBSCN  
PGR NCOA3  
RQCD1 CNOT6  
BCL10 XIAP  
HOXD4 PBX1  
PDS5A STAG1  
FOXK2 BAP1  
JUP CTNNA1  
MAPK1 NCOA1  
JUP CTNNB1  
MMP3 HAPLN1  
TBK1 HSPA1B  
RARA SPEN  
TRAF2 HINFP  
ORC4 MCM10  
RB1 HMGA2  
C1ORF182 DTNB  
SLC38A1 DNPEP  
KHDRBS1 PACSIN1  
MAPK3 DUSP3  
CASK NPHS1  
YWHAQ TSC2  
PPP1R13B PLEKHA5  
ADH5 TP63  
MAPK1 SMAD2  
FGFR1 FGF7  
MAPK1 SMAD1  
CCNT1 HTN1  
HSP90AB1 MAPK6  
RING1 RNF2  
CCL16 CCR5  
ZRANB2 AKAP17A  
KDM1ASIN3A  
CCL16 CCR8  
TRIP4 ASCC3  
FAS ANK3  
SUZ12 AEBP2  
C6 NCK1  
ESR1 NCOA1

EGFR LYN  
PGR PIAS3  
TAB2 MALT1  
LRP6 FZD5  
NCL NDN  
RHOD BMPR1B  
DTX1 DTX3L  
NRIP1 RORB  
RXRA SMARCA4  
IL4R STAT6  
LYAR ZHX1  
NUDT21 PSMF1  
CNTNAP1 KCNA1  
ESR1 SMAD2  
SBF1 MTMR2  
FUS ARHGDI  
APBB1 SF3B3  
CCT4 TBK1  
ARHGEF7 PPM1E  
TADA3 ZNF7  
EIF1B ANXA2  
PDIA3 ADAM17  
JUP PKP3  
DDB1 IKBKG  
APP MDM2  
PTPRB CSK  
MED4 MED19  
MYB HLF  
FYN NCKIPSD  
GRB2 ZKSCAN3  
TCF3 BAZ1B  
GSPT1 XIAP  
SPTBN4 CELSR3  
PCNA RAD18  
GRB2 YWHAZ  
ESR1 HNF4A  
NRIP1 ESR2  
NTSR2 NTS  
DAND5 SOX8  
RAD17 RAD9A

NCK1 RHOA  
IRAK1 IL1RAP  
BBS4 EPAS1  
FAS PTPN13  
SUMO4 PA2G4  
SUMO1 SYDE2  
NKX2-1 HIPK2  
NFKBIA PTPN13  
CDK1 TGFBR2  
MYOD1 HEY1  
NFKB2 CHRN3  
MAPRE1 PIK3R4  
CASP7 XIAP  
DST TNIK  
IL2RB STAT3  
LEPR SNX6  
CCS APBA1  
EIF3K FTSJ1  
PTP4A3 STAT1  
RPS9 MAP3K1  
GH1 CUL2  
EGFR HSP90AA1  
OXSR1 SLC12A6  
UBE2L3 RNF19B  
MFNG NOTCH1  
GNB1 MAP3K3  
USP19 CSE1L  
TARBP2 KCNIP3  
MAP2K2 YTHDC1  
ZRANB1 FBXW11  
PAFAH1B2 REXO1  
MLH1 AP2B1  
FYN SEPN1  
WIPF1 ACTC1  
SMAD7 MKL2  
CEBPB CARM1  
SLC38A1 ZHX1  
PTN RIT1  
SORBS2 YWHAE  
PIN1 PRPF8



PRKDC TELO2  
NFYB C1QBP  
SLC38A1 LNX1  
AP2B1 RNPS1  
MAPK1 TSC2  
MYOD1NCOR2  
RELA PDLIM2  
EXOSC4 DIS3  
CNOT4 UBE2D2  
GNB5 GNG13  
MBP PRMT1  
JAK1 IFNAR2  
CEBPB RELA  
GAPDHLAMA4  
ATF3 IGSF21  
IKZF1 HDAC5  
SLC24A1 GRB2  
PINK1 MAP1LC3B  
COX4I1 TH1L  
TF SH3BP2  
WT1 CREBBP  
NEFL MAP2K4  
EXOSC2 EXOSC4  
KDM6AHIST3H3  
HCLS1 QKI  
XRCC5 PRIM1  
PDIA5 UBQLN4  
MEF2D COPS5  
ZAP70 DEF6  
SMAD2 MYO5A  
WNT1 FZD8  
TRIP13 LRRC61  
EIF2AK2 CASP8  
TSC22D1 TIMM50  
C14ORF135 CEP63  
MLLT3 DOT1L  
NCOA2 ESR2  
GH1 ERLEC1  
FN1 POU3F1  
NRIP1 HDAC2

EFTUD2 GOLM1  
DHPS ARF6  
STAT1 MBD1  
CSN1S1 TOLLIP  
CSN1S1 SAP130  
CCND3 MAF1  
PDCD6IP VPS37C  
MMP16 LRP1  
TP53 NAP1L1  
STOM ACCN3  
APEX1 DCTN1  
FUS ILF3  
ARF6 PLS1  
CLTC GPRIN1  
ERG ETS2  
HDAC3 THAP7  
IMPDH2 FTSJ1  
SH3GL1 DPPA4  
RGS3 EFNB2  
ARPC2 EFTUD2  
PRKACA PDE4D  
PSEN1 NOTCH4  
HSP90AA1 CSNK2A2  
VANGL1 KBTBD7  
CALCR GPRASP1  
PRKACA EPB49  
PRKAR1B PPP1R9A  
BCAR3 PSMD2  
BAG2 HSPA1B  
CCT2 RFW2  
SYK RPS6KA1  
GJA1 GJA3  
VPS26AVPS35  
RNF139UBE2Z  
TRAFD1 TRAF6  
RPS20 MPP6  
USP19 PARK7  
JAK1 ATIC  
XPA DDB2  
APOE NEFM

EPHA3 CRK  
ACTN4 ACTN3  
EIF1B G3BP2  
HSP90B1 MDM2  
INSM1 SORBS1  
HIST1H1B SERPINH1  
RHOA CNKSR1  
TRAF6 TNFRSF11A  
MADD WNK1  
TCF3 CTNNB1  
EGFR CD59  
TCP1 RPAP2  
TRAF2 AASDHPPT  
ITGB2 ILK  
GART IKBKG  
SNCG GRK6  
HRAS SOS2  
UBC SRC  
SOX9 CREB3L4  
STK3 RASSF6  
PSEN1 OXCT1  
GAB1 MAP3K3  
RPS3 MAP3K14  
KCNA1 KCNE4  
HNRNPA3 STK24  
NRIP1 KAT2B  
HOXD9 PKNOX1  
ABL1 SPRR2A  
EPB41 CDKN2A  
PPP1R12B IL16  
AP2M1 RTDR1  
IGF1R PRKCD  
ACTR2 ACTC1  
UBE2M IKBKE  
ACVR1B SMAD4  
MAP3K1 HSPBP1  
HRAS SOS1  
A2M GRB2  
FYN FLT1  
SEC24BFYCO1

AKT1 SMARCC2  
FGFR1 GRB2  
MSH2 ARF6  
NRP1 VEGFA  
HNRNPA1 RPAP1  
COPS2 ING1  
FYN PAG1  
WDR62 GABARAPL2  
MAGEA11 CLUAP1  
FGFR1 RPS27A  
DUSP6 TEX11  
MAP1A RAPGEF4  
APOB SEC61A1  
DAZAP2 POLI  
SFPQ TBK1  
MEF2D KAT2B  
SCNN1B MAP3K11  
WT1 DVL3  
EEF1D RPS6KA1  
ZBTB45MED31  
GFER GPS1  
HCRT HCRTR2  
RPN1 DPF1  
HCRT HCRTR1  
PLEKHA5 PLEKHA6  
RB1 ID2  
USP11 WRNIP1  
USP11 RANBP9  
ARPC2 TRAF6  
PTBP1 RAVER2  
CDK4 CNOT7  
KIT CRK  
KIT CRKL  
DAND5 SMARCC2  
TF MAP3K10  
PRKACA ACCN3  
SGK1 GANAB  
TRAF2 UBQLN4  
CACNA1E EFHC1  
CCNB1 CDK2

KCNK3 YWHAQ  
SMAD9 STAG1  
PML SUMO1  
SKIL SVEP1  
PLIN3 RAB9A  
FUS SRSF2  
FXR2 KIAA1217  
UBE2I MEF2A  
TRIM3 UBE2G2  
RGS14 PRKACA  
SMAD2 INGX  
LDB3 MYOZ3  
NPM1 BARD1  
ACVR1 RHEBL1  
TNNT1 NINL  
MEF2C SF3A3  
TRH TRHR  
BCL9 PYGO1  
HIP1R CLTC  
H1F0 C4ORF14  
SUB1 GTF2A1L  
HNRNPA1 DDX17  
PSMC5 ADRM1  
AP1B1 CLINT1  
PRICKLE3 CRK  
EXOC7 C19ORF50  
APP NID1  
DNM1 SH3GLB1  
CSNK2A1 RNPS1  
IRF6 LBP  
RPS27AKAT2B  
CBL UBE2M  
PLSCR1HOXA1  
WAS PTPN12  
TAF4 TAF2  
PTTG1 PTTG1IP  
GRB2 RBM15  
CNP PRKCD  
TBP SNAPC4  
APC HAUS1

MGMT CSNK2A1  
IQGAP1USP46  
SMARCA2 TAF9  
GRINL1A MYO3A  
BRCA2 UQCC  
CANX MAPK8IP1  
PTPN6 MYH9  
RPS27ATANK  
NCOR1 THAP7  
SNRPA PTBP1  
CPE GTF3C1  
CASP3 ACIN1  
ATR CDC5L  
ARHGEF9 RPS27A  
PSMA3 NFKB2  
BCL3 CTNNB1  
TBL1X SIAH1  
ST13 CDC42  
EPB41 LRPPRC  
EPB41L2 GRIA1  
GRB2 OSBPL9  
RPA1 SMARCA4  
PAAF1 DERA  
ZNF33BZHX1  
HEATR2 GSTK1  
EEF1D SAFB  
EPPK1 IKBKG  
MCM10CDC6  
RPS27ADIO2  
TAPBP CALR  
CD247 UNC119  
RPS20 MPHOSPH6  
TRIM37RHPN1  
GRB2 SPEN  
IGF1R RPF1  
TRAF2 TNFRSF19  
MITF UBE2I  
REPS2 REPS1  
CSNK2A1 PPP2R4  
CCT3 ATG16L1

PRKAR1A CDK4  
OPRM1 PLD2  
H2AFX BLM  
CALM2 SCN5A  
SHBG PLP2  
LRPPRC KIAA1244  
TSG101 CD2AP  
PRDX1 CLEC4G  
SDC3 COL5A1  
RTCD1 RPS11  
CCNB1 PKMYT1  
TMEM66 RIBC2  
GNB2L1 SLC27A6  
EPB41 CALR  
DLGAP1 GRIN2C  
BCAR3 CTPS  
FYN CKAP5  
HSPA1L TRADD  
AKT1 RHEBL1  
YWHAG KRT82  
YY1 SMAD3  
ANKRD23 MYPN  
MEST SMYD3  
FN1 TMPRSS6  
RPS4X RUVBL2  
NFKB2 TUBGCP2  
FGF2 GPC3  
CREB1 RNF111  
RAD17 RFC4  
XPO1 IRF5  
ATP1A1 ADD1  
TNKS DISC1  
MEF2C TFPC2  
STAT1 IRF9  
MYST2 AR  
AIRE PCNA  
GEMIN4 PIAS3  
FOS FAM50A  
DNMT1 RPS27A  
NFKB2 GTF3C1

P4HA2 DMWD  
POLR2E STAP1  
RPL11 IKBKG  
HDAC3 DHX30  
GHR PTPN9  
BCAR3 TRIM28  
RAD17 RFC1  
RAD17 RFC2  
DAND5 RUNX1  
PEX19 PEX3  
RAB3D CHM  
HSPA5 DDX24  
INSC PARD3B  
TOP2A NR4A1  
LPL PTPN4  
CHST15RRAGD  
INSC PARD3  
ZNF638 SRRM1  
MED15 MED9  
FCER1A FCER1G  
RB1 E2F2  
ACTN2 MYPN  
FAM107A CANX  
LRP6 ANTXR1  
PLK1 ERCC4  
RPA1 BRCA2  
TUBA1A SIAH1  
HSPA1L NFKBIB  
HOXA5 FOXA2  
CD40 RNF219  
RECQL5 MCM7  
HSP90AA1 MYOD1  
SOX9 NR5A1  
FXR1 CRMP1  
ACVR1 FBXO30  
TACC2 KAT2A  
NCL SREK1  
TACC2 KAT2B  
PLCG1 MAP1B  
CHD1 SAFB



TP53 NFYA  
UBE2C MAD2L1  
RXRG CAMK2B  
ZNF24 ZSCAN30  
RPS3 TRAF1  
EPN2 RNF11  
TRPC3 ITPR3  
SMAD2 SNIP1  
ATP2B2SLC9A3R2  
FN1 FBLN2  
GRAP2 GAB3  
EEF1A1PAEP  
RB1 EP300  
PIK3R1 TPSAB1  
TP53 ING1  
LAMA5MEP1A  
SYNGAP1 DLGAP4  
PLK1 TANK  
SLC25A10 MAGED1  
CBLB CD2AP  
HIST1H3J CHAF1A  
HCK TSG101  
HIST1H3J CHAF1B  
REC8 SMC1A  
PLD2 AQP3  
PROM1 PLEKHA5  
XRCC5 RUNX2  
KRT13 APC  
BMPR1B STK35  
BIN1 SH3GLB1  
HSP90AA1 PRKDC  
HNRNPH1 PIN1  
SF3B1 BRF2  
EEF1A1MAGED2  
BIN1 AMPH  
IRAK1 PELI1  
NCAPG2 NEK6  
SH3GL2 ADAM19  
MLH3 FAN1  
CBL FRS2

PC GOLT1A  
UBE2N SIAH1  
EWSR1 ZDHHC3  
LZTR1 TUBGCP4  
PZP TGFB2  
APEX2 NINL  
ATG12 OTUD4  
SPTBN1 CPNE4  
NGFR FSCN1  
ITGB5 TENC1  
BAI3 ZNF24  
EPB41L2 DRD1  
GIPC1 MYO6  
YWHAG DISC1  
CALR SLC6A4  
HNRNPL SMYD2  
ANXA9 ARHGEF10L  
SGK1 CAMKK2  
HIF1A PIAS4  
WDR1 TNFRSF10D  
EXOSC9 MPP6  
GFAP TUBGCP4  
SAP30 PHF12  
LRPPRC MAGED1  
SF3B4 ITSN1  
YWHAH REPS2  
SMARCA4 BRWD1  
BCAS2 PGR  
FCHSD2 C9ORF78  
CPNE2 IKBKG  
PTP4A3 RAB3GAP2  
PRAF2 ARL6IP5  
USP2 FASN  
ABCC8 KCNJ11  
KCNA3 IL16  
NEDD4L RNF11  
ITGA7 FHL2  
BAG6 RPAP1  
QTRT1 SH3GL3  
HIST1H4I TBL1XR1

MCM4 ING5  
NR1D2 NCOA5  
ORC3 CLYBL  
TBPL1 C2ORF18  
JUP PTPRJ  
BAG6 IQCG  
LDOC1 FAM107A  
TARBP2 IKBKG  
NR4A1 ESF1  
CHGB TAZ  
CARD10 IKBKG  
LMNB1 TOR1AIP1  
LUC7L3 RRP1  
GALR2 GAL  
KCNH2 ALG10  
VTN VEGFA  
SMAD2 UCHL5  
TRAF6 IKBKG  
SMAD2 ATP6V1D  
BRSK2 KBTBD7  
SNAP29STX12  
ESR1 RPS27A  
CTBP2 LCOR  
COIL PLEKHG4  
FOS CLU  
CASQ2 CSNK2A2  
PRKAR1A SET  
CRMP1 RTN4  
STXBP3 GRB2  
CDC27 ANAPC1  
ANK3 SMAD2  
MAPT GSK3B  
ITGAV PTK2  
ACTN1 XRCC4  
ITPR1 HOMER1  
APLP1 GSTM4  
MET PCBD2  
RB1 TFDP1  
RGS3 HIPK3  
MAPT GSK3A

RB1 TFD2  
PSEN1 CDC37  
RPS6KA5 PLA2G4A  
MLL PAF1  
STRN3 STK24  
CDK4 SERTAD1  
NGFR NTRK2  
CHEK1 YWHAG  
ZBTB16ANAPC5  
FURIN EDA  
INS CTSE  
HYLS1 C14ORF1  
NRAS RASSF5  
PIAS4 LEF1  
LIN7B ACCN3  
HSP90AA1 NFKB1  
CRYAB TTN  
LRPPRC PHLDA3  
MED15 MED29  
ADSL USP15  
SUMO2 ZNF828  
XRCC4 SETMAR  
NUP160DISC1  
TRIM27BEGAIN  
HADHBMAP1LC3B  
NR2F6 PAF1  
EPHA2 PTPN11  
C2ORF18 ACP6  
MITF GSK3B  
SMAD2 OLIG1  
RALB EXOC8  
LYN SPHK2  
NCK1 EIF2S2  
USP39 RNMTL1  
USP11 OSBPL9  
LCK MAPK1  
HIST1H3J CBX3  
EHMT2 RERE  
PDGFRA GRB14  
RPS16 RELA

RIT1 ASB4  
YWHAQ RGS3  
RRAS2 RIN1  
HSPA5 YWHAZ  
RAB6A GCC2  
HAP1 DDX49  
CALCOCO2 ZNF101  
ESR1 GRB2  
IRF7 TBK1  
HSPA1B SNCB  
KALRN SUMO3  
PIGA PIGH  
CXCL10 DPP8  
TBK1 PPP6R1  
CASP1 RPF1  
IL8 WASF1  
SORBS3 CPSF7  
CDKN2B CCDC90B  
PSEN2 APH1A  
FDX1 CYP11B2  
SF3B1 WBP4  
DYNLL1 AMOT  
FAM107A EFEMP2  
DPEP3 MTA3  
FABP3 TNNI3K  
TRADD CEP110  
COL4A1 THBS1  
FXR2 C10ORF62  
CA2 NONO  
PRRC2B ATN1  
SMAD2 RHEBL1  
PRRC2B ATXN1  
UTY NCOA6  
CSDA MAP3K14  
SMAD4 CITED1  
SUMO2 CDCA8  
BRD1 FEZ1  
HTR1A GPR26  
DHPS UBE2H  
RFX3 BIN1

SLX4 TERF2IP  
TOMM70A HSP90AA1  
SOX10 TCF12  
LYPLA2 SCMHI  
CCNA2 E2F1  
EEF1D HLA-B  
HLA-B USP14  
FCGR2B INPP5D  
CCNK DVL3  
HNRNPL FGFR3  
CHMP1B CHMP1A  
AMOT MPP5  
CSTF2 SRRM1  
ACVR1 SMAD5  
EPB42 CD47  
DAND5 NFYC  
PARK2 UBASH3B  
ESR1 SRA1  
YWHAG INPP5E  
PSAP BACE1  
CHTF8 DSCC1  
BRPF1 MEAF6  
NMI HHLA3  
PER3 CRY2  
TGFB1 WDR61  
GDF9 FOXP1  
CSE1L KPNB1  
GRAP2 CCNDBP1  
BAI2 ARHGAP1  
PTPRE MAPK3  
UBE2D3 XIAP  
RNF144B UBE2T  
ANK1 OBSCN  
HSP90AA1 RPS6  
TGFB2 VASN  
EPB41L2 ADORA1  
TRDM1 SETDB1  
GRB2 RHOU  
PDCD6 ANXA7  
EZR TMEM8B

PMS1 PSD2  
MDM4 CDKN2A  
TPM1 TMOD2  
CDC7 MCM7  
MATR3 STK24  
CDC7 MCM5  
NR2F1 RXRA  
ITGAV CALR  
SMAD6 SMAD4  
NRIP1 TNFRSF14  
CDC7 MCM4  
RASA1 GRLF1  
MAP3K10 MAPK8IP2  
TOM1 ZFYVE16  
FNIP1 MAP1LC3C  
NUCB1 TOLLIP  
PTPRJ ALK  
PRKAR1A SPTBN1  
HIP1 NECAP1  
FAM40A FAM40B  
SLC25A6 MAP3K3  
MDM2 HIST2H2BE  
TBP GTF2A1L  
APOA1 APOF  
EEF1D ANKRD12  
PHLPP2VAT1  
PLSCR1SPRY2  
CAV1 RADIL  
RUNX1 TAZ  
RALGDS PDK1  
KNG1 ELANE  
ACVR1B SNX1  
PRKCD HABP4  
SMARCB1 SMARCE1  
NEDD8 USP13  
RAF1 BCL2L1  
PRMT1 NCOA3  
ACP5 C2ORF18  
GAB1 INPP5D  
SMAD6 RNF111

USP53 RAD50  
F5 CSNK2A1  
COX4I1 MCL1  
RPL22 MAP3K14  
ARAF CSNK2B  
PRKAB2 GYS1  
FGFR1 GRB14  
TFE3 DHX9  
MFN2 MARCH5  
ARHGDIA HNRNPAB  
GAB1 FRS2  
KIAA1967 KBTBD7  
RAC3 CACYBP  
MITF YWHAZ  
BCL2 MOAP1  
RPS27A TRIM5  
CSN1S1 PPM1J  
PIAS1 ESR1  
APEX1 HLA-B  
KDR GNAQ  
RAP2A FKBP2  
BAG6 RNF126  
BAG6 EFEMP2  
TRPM7 PLCB1  
HIRA NFU1  
HNF1A HNF4A  
RPS6KB1 PPP1R9B  
INGX SMURF1  
TNFSF11 MAPK3  
GRB2 SGIP1  
SF3A2 PRPF19  
SEPT2 SEPT9  
RPS27A IRF7  
COL4A2 ANTXR2  
SLX4 GLTSCR2  
FGG ICAM1  
RGS4 GNAQ  
ITGB2 ITGAD  
CASP7 CDC42  
DYNLT3 TESC



PNN ZCCHC17  
RUNX1T1 KPNB1  
ALDOAMLH1  
NCK2 CD3E  
SYT7 NRXN1  
VCAN FBLN1  
NR2F6 RXRA  
IFIT1 TMEM173  
ERBB3 SYK  
USP33 DDX56  
RPS27ADVL3  
PIK3R1 RPS27A  
UBE2E1 HDAC6  
GRM1 HOMER1  
NEB ABI1  
TMBIM4 SUN2  
NLGN1 DLG3  
GIPC1 DRD2  
AKAP8 DDX5  
PPP2R1A SGOL2  
PPP1CB SH2D4A  
PIK3R1 GRB2  
SMAD2 SMARCC2  
IQGAP1 CALM2  
CDK4 DBNL  
NFKB2 EEF1A2  
TAF7 ZSCAN1  
MYH10 IKBKG  
RBCK1 IKBKG  
TBX3 HDAC1  
ICAM3 ZBTB16  
PLSCR1 CRK  
RGS20 NSF  
MLH1 PPP2R2A  
EFS BCAR1  
HIF1A EGLN1  
MSH2 BLM  
ERBB3 ZAP70  
RPF1 TTYH3  
KIF5B SMAD2

TSLP IKBKG  
HNF4A SMAD2  
APBB1 SF1  
STAT3 EPHA5  
UBE2L3 SMURF2  
RB1 LIN54  
PLRG1 SF3A2  
DNM1 PIN4  
NEBL ACTB  
MXD1 RPS6KA1  
FBL H3F3B  
LDB1 SSBP4  
SGTB RAI2  
NCAN HMGB1  
APC KRT23  
EIF3E HAP1  
MYO7ACDH23  
MAP3K8 CALM2  
PLRG1 ZSCAN1  
TOP1 TAL1  
PSAP MAFF  
GTF2F2 RNF168  
NEDD8 COPS5  
UNC119 FXYD6  
MITF SUMO1  
PRMT2 E2F1  
HNF4A NCOA1  
MUSK SYNE1  
COTL1 IKBKE  
EZR FAS  
LSP1 BMPR2  
SMAD7 LEF1  
SMAD2 SEMA6A  
HDAC4 MEGF10  
COPS6 SHKBP1  
INSR ENPP1  
SHBG AK2  
LATS1 STK4  
ZRANB1 HECTD1  
CDK5 CDK5R2

PTP4A3 UBE3C  
CBS C17ORF28  
SYNCRIP SYT9  
SRSF2 CDC5L  
SLC25A5 TRADD  
MED7 IKBKG  
RBBP5 MLL3  
MKL2 KDM3A  
POLR2C MED28  
HMBS RANBP9  
GGA3 VPS18  
RB1 SP3  
SNAP23 VAMP8  
SNAP23 TLK1  
UBE2V2 C7ORF30  
PSMB5 SEC14L3  
SH2D2A MAP3K2  
HNRNPA1 TNPO1  
TACC2 CREBBP  
BAG3 HSPB8  
HIVEP2 FBXW11  
PSMB5 TAP1  
CASP3 DBNL  
HAND1 TCF12  
DRAP1 FEZ1  
FYN SPHK1  
DDX6 DCP1A  
DRD3 GRB2  
PPARG NCOA4  
SMAD2 TSPYL2  
HNRNPL TOPORS  
MEN1 CHEK1  
JAK1 PTPN6  
HLA-B PREP  
EXOSC6 MPP6  
SRC SMAD3  
PSEN1 PKP4  
VIM SPTAN1  
PRNP BAG6  
HNRNPA1 KHSRP

FAM175B OPTN  
SENP1 RUVBL2  
SMAD4 DAXX  
POU1F1NR1I3  
FUS GPRIN1  
AHCYL2 MAP3K5  
S100B NDRG1  
CCNG1 PPP2R4  
FBXW7 KIAA1875  
AP2M1 CLEC4M  
ZRANB1 FAM40B  
STAT1 SYK  
MICALCL RAB1B  
ZBTB8B LMO3  
KBTBD7 KIAA1377  
TAF10 TAF9  
TGFB1I1 FKBP1A  
PSMD3 PSMD7  
MYO1CFBL  
KRT1 DSPP  
ASB13 HIF1AN  
XPO1 ORC1  
LCK UBE3A  
CCT4 PPP2CB  
CBX5 L3MBTL1  
MID1 IGBP1  
SEC13 RAB11A  
DEDD HOXD4  
PURA PURB  
CALM2 GRB7  
HRAS RABAC1  
ZG16B UBQLN4  
PSEN1 CDK5  
CD40 SUMO1  
TIMP3 ADAM17  
MED1 MED4  
SKIL SPARCL1  
COPS8 COPS7B  
DAND5 E2F1  
WBP4 HTATSF1

CXCL11 DPP4  
NRP1 FGFR1  
SMC4 PHLDA3  
RPS27AMAP4K1  
NAGA GNGT1  
GRB2 ERBB2IP  
CDK20 GTF2IRD1  
TCP1 GPN1  
SEMA6A EVL  
CSNK1A1 PPP1R14A  
GFER COPS2  
MAG MAP1B  
SNCA PTK2B  
BMI1 RNF2  
DDX20 PRKAB1  
GLI2 CREB1  
ZBTB43MCM10  
APC EIF4G1  
GH1 OTUB1  
UBE2H BRAP  
ZSCAN30 ZSCAN16  
GATA1 RAI1  
ABL1 FOXF2  
ACTN1 PKD1  
PRKACA GABRB3  
ARRB1 CYTH2  
RASA1 SYK  
PRPF40A PRKAR1A  
RASA1 ZAP70  
PLEKHA5 KIF3A  
EPN2 GRB2  
CAPN1 NFE2L1  
RIPK1 MAP3K14  
SSFA2 WNK1  
FYCO1 MAP1LC3C  
RGS4 COPB1  
COBRA1 PACSIN1  
MAPK1 TGIF1  
TRIM37TANK  
PAPOLA HDAC10

TP53 ING5  
CCT4 ACTA2  
SMARCA4 SIN3A  
ZAP70 SLA2  
UBE2WRNF115  
PDPK1 CARD11  
RPTOR MAPKAP1  
EMD CNN3  
NPM1 HIST2H2BE  
KRTAP4-12 ADAMTSL4  
SKIL GLUL  
H2AFX ALG9  
TXK SH2D2A  
DFFA GZMB  
HSPA4 RCOR1  
MEPCE HEXIM2  
ESR1 MKNK2  
CKMT2 PSMD4  
NR4A1 RPS6KA6  
LATS1 LIMK1  
PLSCR1ZNF764  
ARMC6 C20ORF24  
UTRN PTPN12  
PCBD1 LN1  
EFCAB6 SIN3A  
NCK1 SUV39H2  
ARHGAP5 PTPN18  
ZNRF1 UBE2W  
LN1 CEP72  
NR4A1 YWHAZ  
PIK3R2 HCK  
VIM PKP1  
PLD1 PEA15  
PCP4 CALM2  
CD63 KIT  
GRIA1 GRIA4  
SERPINB9 PLEKHM1  
TP53 SYVN1  
CLNS1A SNRPE  
SLC25A21 SMAD3

TAF10 TAF12  
CASP3 PRKCZ  
ZBTB16HDAC9  
RTCD1 ARF6  
TRPC3 ITPR1  
GRB2 FAM110A  
VTI1A STX8  
HNRNPU RELB  
MAPK1 BCL6  
YAP1 RUNX2  
TP53 CSE1L  
NDC80 AURKB  
TRAF2 IKBKE  
LYAR PRPF19  
CLNS1A SNRPD1  
AKT1 PI4K2B  
NCL MDM2  
ERCC1 UBL7  
CLNS1A SNRPD2  
RAB5A ANKFY1  
CDC25C BRSK2  
DNAJC6 CLTC  
ADRA2C YWHAZ  
CNDP1 CNDP2  
APC YWHAE  
MAPK1 IFI35  
AP2A2 AP1S1  
SERPINA3 CMA1  
NR3C1 RELA  
HOXC11 HDAC5  
PDIA3 SLC12A3  
FAS EEF1A1  
BRCA1 UBE2L3  
PIK3CA YWHAH  
EIF3J SIAH1  
NPY NPY5R  
CBFA2T3 HDAC8  
YWHAG SMCR7L  
CLNS1A SNRPD3  
CSTF2 CPSF1

JUP BTRC  
ABL1 ABR  
IKBKB PPM1B  
DNASE1 ACTA2  
ADSS ATG10  
AXIN1 RUNX2  
FYN RPL10  
TERF1 SH3GL3  
SIN3B IKZF1  
FOS WDR65  
UBE2M CPNE2  
NR3C1 NR3C2  
GABARAP RABGAP1  
COLEC11 BCLAF1  
USP32 ERP44  
NOP2 PTPRJ  
ZNF536 WNK1  
TRA2B SF3A2  
HLA-B STRAP  
GFI1B LZTS2  
UBE2H RNF34  
H2AFX PPP2R4  
RALB RGL4  
GHR DUSP7  
TOP3A TINF2  
XPO1 ANP32A  
LIMS1 PARVA  
BMX PTPN21  
RAD51 C17ORF28  
STAT3 DAXX  
PFKM NOS1  
SDCCAG3 WBP5  
MAGEA11 NSUN4  
SLC16A8 DNAJB9  
JARID2 MTF2  
JUP PTPN14  
CTBP2 EHMT2  
PRKAR2A AKAP14  
SRC WWOX  
SRF NKX2-5



VIM SH3YL1  
LTF ITLN1  
FAM107A USHBP1  
IGBP1 MID2  
SIK1 YWHAZ  
DCC APPL1  
HK2 UBQLN1  
DAND5 ZBTB16  
DAND5 PRKCZ  
TRAF5 TNFRSF4  
TRIP10 AKAP9  
SRF CRIP2  
JAK1 IL2RG  
CDK14 CCND3  
UCHL1 CDKN1B  
ANXA6 TJP1  
TGOLN2 PRKD2  
ITPKA CAMK2A  
DENR COBRA1  
NPHS2 CD2AP  
LDB1 SSBP3  
ANKZF1 NRSN2  
CTSG SELPLG  
SMAD4 TM9SF2  
PRKDC ATG4C  
DAND5 SPTAN1  
STK11 SNRK  
STAMPB STAM  
RHOA PRKCZ  
MAP3K14 NFKB2  
MRE11A PRKDC  
CDC25A YWHAZ  
SMAD2 HIPK2  
RPAP2 MED4  
PHYHIP PNPLA2  
UBC RYBP  
POLR2C SMARCC2  
ZBTB8B LNX1  
TP53 MAP1B  
BRAF MAP2K2

EGFR ICAM1  
DVL2 PRKCG  
ZNF207 USP7  
NUP155 OTUD7B  
NBN EP300  
FAM107A USP15  
MAPK8IP2 MAP3K11  
GRB2 RBM4B  
PSMD6 USP20  
ITGB3BP C4ORF27  
AXL PTPN11  
CAT ABL2  
PIK3R1 MYLK  
MAP3K7 TRAF2  
ID2 UNC119  
FTSJ3 DDX56  
VAMP7 AP3M1  
EIF2C3 DICER1  
YWHAQ SUV420H1  
KIAA1217 TEX11  
NMI LSM4  
PPARA EP300  
MYO1CGIPC1  
ANP32A MAP1B  
HLA-B SDS  
HLA-E SEC14L3  
CIITA SMARCA4  
CHD1L WNK1  
TOMM20 KIAA1377  
GAPDH CAMK4  
CTBP2 ZNF512B  
C19ORF57 CENPQ  
POLR2C POLR2G  
TCERG1 DNAJB9  
HBP1 ZNF182  
RET PTPN11  
ARID1B SMARCC1  
DOK2 HCK  
CETN2 USP49  
KNG1 CTSG

CRB1 TSC22D1  
CTNNB1 SMAD2  
PTPRJ PKP4  
SIN3A SUDS3  
TRAF2 SETD5  
CDKN1A MDM2  
EP300 ING4  
EIF1B PSMD13  
APC KIF15  
DNAJA1 OSGEP  
DCUN1D1 RNF11  
HAAO GAD1  
JAK2 IL4R  
CFL1 MYCBP  
SUPT5H GTF3C1  
FYN KDR  
INSIG1 VCP  
PML SMAD3  
LRPPRC TRAF6  
OAT MCC  
SERPINF1 MLH1  
SLC26A3 SLC9A3R2  
USO1 BET1L  
DCX AP1M1  
PRDX2 RNF32  
TSC2 PPP2CA  
RPP38 BVES  
BMP7 BMPR1A  
HSPA1B DNAJB11  
PTTG1 CDH1  
NRF1 MAFF  
PTPRS TUBB2A  
RAD23B UCHL5  
GRM8 FLNA  
TEK PTPRJ  
MBP MELK  
LSM11 ZNF473  
RXRA MAPK7  
POLR1C USP11  
HAP1 TSPYL1

HDAC5 CAMK2A  
TF HFE  
STK11 TNIP2  
ZNF593 RAB1A  
ITPR1 TRPC5  
MPP3 HAP1  
USP11 ATG10  
ANKRD44 PPP6R1  
G3BP1 UIMC1  
SLC9A3R2 TBC1D10A  
MCRS1 MED4  
PGR XRCC6  
PRC1 CCDC85B  
UBC NPLOC4  
STK3 CNKSR1  
RPS27A GPR158  
CASP3 BCAP31  
FYN FLOT2  
ACVR2A ACVRL1  
SMAD2 PIAS3  
HAP1 ZNF691  
ATR RAD9A  
PPM1B VIL1  
UBXN2A VCPIP1  
NR3C1 ONECUT1  
CTNNA1 TLN1  
BCL2L1 BCL2L14  
OGT DAND5  
TDP2 CD40  
CPS1 YWHAZ  
EIF4G1 EIF4A2  
CD99 TRIP13  
PPP1CCATM  
EPPK1 TRAF6  
PGR SRC  
EIF4B EIF3B  
KIAA1549 MBD5  
GPRASP2 BTRC  
THBS1 MYO5A  
MEF2C USP25

CCNT1 PGC  
FRYL BAK1  
EEF1E1 EIF1B  
HOXA13 SMAD2  
TRAF2 SPHK1  
EEF1A1BTBD2  
DLG4 SEMA4G  
HOXA13 SMAD1  
ZBTB16WDR33  
TUBA4A MAGED1  
JAK1 OSMR  
NOP2 MCRS1  
GNB2L1 PDE4D  
TRAF2 TRAIIP  
MAPK8 SH2D3A  
PRKCI RAB2A  
SMAD9 PABPC4  
BRCA1 CSNK2A1  
FYN PTK2B  
INGX SMURF2  
PCNT DPEP3  
RNF2 PCGF6  
MAP3K11 MAPK8IP1  
HSPA1L IKBKG  
CAPN1 DPAGT1  
SOS2 MYO6  
PPOX COPS5  
HRAS RALGDS  
KCNA2 KCNA3  
NANOS3 EXOC6  
ANP32C APEX1  
USP7 SCML2  
ARID1A GATA1  
LRRN1 RBBP6  
MYBL2 CDKN1C  
HDAC3 TBL1XR1  
CANX LRP1  
IPO4 FANCD2  
RET MAPK1  
BDKRB1 MEP1A

TGFBR1 STK35  
CD3E NCL  
SSSCA1DSG1  
IDH3A IKBKG  
UBE2E1 RNF26  
LIMS1 ACP6  
AGT EWSR1  
ZSCAN1 CDC5L  
ESR1 LGALS12  
AHCY TRAF6  
USP13 TRIM63  
CUL1 NR1D2  
LNX1 TIFA  
NFKB1 BRMS1  
SMAD2 NCOA3  
CYR61 ITGAV  
SDPR PRKCA  
PSAP GRB2  
SERTAD2 CREBBP  
CEBPB FOXO1  
DMAP1 RUVBL2  
CNOT4 UBE2D4  
NFKB2 PSMD13  
PTPN1 CAV1  
TAF10 SNAPC4  
TRAF6 HYOU1  
UBE2C DTX1  
KLF7 SUMO1  
PRKCA EEF1D  
PEBP1 FTSJ1  
HLA-C HLA-A  
H3F3B EHMT2  
HOXC11 TBX21  
CDH1 TNS3  
CCNT1 AFF1  
FCHSD2 SH3BGR  
PLCG1 SHANK2  
SLC9A3R2 WWTR1  
HLA-B DLAT  
CSF1R YES1

COIL LNX1  
RPA1 CHD1L  
BMPR1B SQSTM1  
CSF1R LYN  
NUP98 HDAC1  
PRKCA RICTOR  
ESCO2 EHMT2  
MARK3 TCEA2  
MLLT3 AFF1  
HIP1 CLTB  
CSNK2A2 WAS  
TIFA TRAF6  
HIP1 CLTA  
PUM1 SMAD1  
EIF5 EIF4G2  
COL1A1 DDR2  
GSN PXN  
GABARAP ULK2  
AXIN1 PPP2R5C  
TP53 TSG101  
POLA2 DDX24  
ANP32A MEPCE  
NCK1 TUBA1A  
BIK BCL2L1  
MXD3 SMC3  
GAB1 PTPN18  
KPNA1 KPNB1  
MT2A PAK2  
RB1 PML  
CCNDBP1 COPS5  
RELA SIRT1  
CD247 SLA  
KIF5A ITSN1  
CYLD CEP192  
IL8 CSNK2A1  
NFE2L2 EIF2AK3  
NCOA2 ANKRD11  
HAP1 CCDC113  
BCL2L11 BCL2L1  
MYC MAP7D1

SRC TULP4  
HYI TEX11  
HNRNPA3 SF3A2  
HDAC1 RBBP7  
BCL2L11 BAX  
SHC1 CRK  
CAMK2G PEA15  
EIF3F EIF4G2  
SHC1 CRKL  
ZRANB2 EP300  
ARG1 ARG2  
COIL TSPYL2  
MAPK1 ARRB1  
PTK2B DLG3  
TMEM104 USP36  
LMO4 MTA1  
BCL2L11 MCL1  
TP53 ARID3A  
ATM FANCI  
ARPC3 BAG6  
PRKCZ NELL2  
ZSCAN30 ZNF232  
MAPK10 HNRNPK  
EPB41 DRD3  
EIF3H USP3  
MAP3K2 IKBKG  
PRKACA CACNB2  
TGFB1 CDC20  
FGFR1 CRK  
CFL1 YWHAG  
CFL1 ATXN1  
RFC1 MRE11A  
VIM SDCCAG3  
DGKZ PARD6A  
SUZ12 SIRT1  
BCAR3 PPP2R1A  
DAB2 AP2M1  
EXOSC5 LIPG  
NFKB2 MYBBP1A  
SMAD3 PCDH1



TP53 PRMT1  
MUSK COLQ  
LGALS3 CSNK1A1  
KIAA0226 UVRAG  
ATF2 CSNK2A2  
SLC22A1 POU2AF1  
CACNA1D STX1A  
PRNP IER3  
UBE2K TRIM35  
CAPZA1 TRAF6  
MED21 MED29  
IL1RN IL1R1  
ZBTB16RUNX1T1  
GSK3B SF3A1  
IARS NFKB2  
HTR2A MRPL28  
SFPQ RPS27A  
DEGS1 SHMT2  
RASA1 KDR  
TGFB1I1 VCL  
ZIC2 RPS27A  
TRIM46UBE2Z  
PPP2R1A SIKE1  
FANCC FANCF  
SUPT3H MED12  
PIK3R1 WBP11  
CHD3 SERBP1  
STXBP3 SNRPD3  
SNAP23FXR2  
FXR2 PSME3  
GADD45GIP1 IKBKG  
MET HGF  
MARCKS NMT1  
UBC DHX30  
STXBP3 SNRPD2  
PRNP CNP  
H2AFX FANCD2  
RARA POU2F1  
NUP43 NUP85  
STIP1 HSPA14

ANXA4 GP2  
SIP1 DHX9  
KPNA5 BRMS1  
CDC25B CSNK2B  
WIP1 ESR2  
HDAC3 ETV6  
PRKAR2B AKAP14  
PRMT1 CTDP1  
EGFR CAMLG  
SMAD7 HDAC5  
CDK2 POLL  
IRF8 RELA  
RARA HNRNPL  
TGFB1I1 CCNA1  
EEF1A1 CRCT1  
TADA3 RXRA  
MAPK1 RPS6KA1  
ESR1 RPS6KA1  
ATF7IP DISC1  
MAP4K4 GRIP2  
ADAM10 AXL  
HSPA4 HCFC1  
ANKRD28 ZNF512B  
TFCP2 HDAC1  
CACHD1 ZMIZ1  
HTT MED31  
GRB2 CLYBL  
DAPK1 STX1A  
PPP5C CDC16  
FN1 NT5E  
SPTBN2 ACTB  
ESR1 SAFB  
VAV1 EZH2  
PTK2B EWSR1  
LPXN IKBKG  
NCOR1 ATXN1L  
HNRNPA1 MRPL37  
SMAD4 SMAD5  
HDAC3 HNF4A  
IRS4 IGF1R

CACNB3 CACNA1C  
MED21 MED9  
PDCD6 FAS  
RAB6A ERC1  
TRAF3IP1 WAC  
SYT1 IRF3  
IPO5 NUP98  
HIST1H4I THAP7  
NOL4 MAGEA11  
CETN2 USP44  
ESR1 TRRAP  
MAP3K11 MAPK8IP3  
H3F3B KAT2B  
HNRNPA1 HNRNPL  
PLXNB1 PLCG2  
MCM5 ORC1  
MCM5 ORC2  
ACTB RUVBL2  
IRF5 TRIM15  
CUL4B DCAF17  
PSEN1 ST13  
DDB1 DCAF15  
KIT KITLG  
FBXW11 ARIH1  
ACP1 CTNNB1  
YWHAG DCP1A  
MAGEA11 OTUB2  
HNRNPUL1 POLR1E  
ERCC3 ZSCAN1  
SERPING1 SELP  
CLASP2 LXN  
EFNB1 PICK1  
UBE2I DAXX  
GNB5 RGS9  
USP11 TCEAL1  
BIRC5 BIRC2  
TP53 PADI4  
YWHAQ EPB41L1  
CBX6 USP7  
PPP6R3 USP36

GABBR2 NSF  
CD2BP2 SNRPA  
BIRC5 BIRC3  
E2F1 CUL1  
PLXNB1 SEMA4D  
ESR1 NR0B2  
MYH7 TEAD4  
GABARAP ATG4B  
NCK1 LRRC3  
ZZEF1 SKIL  
CD40 TRAF2  
RORA EP300  
SDC3 CSK  
NFKBIA HDAC5  
PRPF40A SF1  
TBP SET  
IGF1R DOK4  
CCL4 CCR3  
RND3 ARHGAP5  
USP7 ATG10  
NKX2-2OLIG2  
CCL4 CCR5  
SIN3B HDAC1  
IL1RL1 TRAF6  
CCL4 CCR8  
CDK2 RBM4  
OTUB1 ATG5  
S100A4 BTC  
ALB GRB2  
MF12 DERL2  
CDKN3 MS4A3  
PAX3 PSMD4  
AGFG1 PKIA  
SIRPA TRIM2  
H2AFJ RCC1  
BCAR3 TARS  
DRD4 KCNJ3  
ORC3 DBF4  
NCOR1 COPS2  
CCND1 STAT3

DRD4 KCNJ5  
POLR2C EEF1A1  
HAX1 CTTN  
ARAF YWHAZ  
GH1 EIF3I  
FYB SKAP1  
NKX2-1PAX8  
CBR1 TNIK  
RPL27AMAP3K14  
AGTR1 ADRBK2  
FGF2 RPS6KA3  
COL1A1 DCN  
GIPC1 SSR4  
INSR GRB7  
SETDB1 PTPRS  
NUMA1PLCB1  
PPP1CBSMARCB1  
CD40LG POLR2B  
MSH3 MSH2  
CDKN1B TRAF2  
INSR GRB14  
CRKL PLEKHA1  
BCL10 MALT1  
FMNL1 RAC1  
BAG6 PPP4C  
ATP5D PSMD6  
RPA1 TP53BP1  
CBX4 SKIL  
ADCY2 ADCY1  
AMFR UBE2D4  
MCC SYMPK  
CD8A SRSF1  
NKX2-2HDAC1  
INSIG1 RPS27A  
CITED2LHX3  
SMAD7 WWP1  
ATXN2 SH3GL3  
ATXN2 SH3GL2  
PTP4A3DNAJA1  
SNAI1 HDAC1

SMAD4 TGFBRAP1  
VAMP2 STX4  
RGS16 GNAO1  
PAEP IGSF21  
RPF1 N4BP2  
DLG3 CAMK2A  
SRC GRLF1  
APBB1 ENAH  
BCL2L11 MAPK10  
CAD TAB2  
KCNH2 RHOH  
SLC25A10 PRKAB1  
PC MDH2  
MED31 MED19  
PIK3R1 PTK2  
DCUN1D1 TRIM39  
RELA DNAJA3  
GSK3A HSF1  
RXRA NR1H3  
UBE2L6 TOPORS  
MEGF10 ZNFX1  
SIP1 RNPS1  
AKT2 APPL1  
HGS GGA3  
NMI EMILIN1  
HTT GIT1  
PLAT CALR  
MEF2A MEF2D  
TP53 PLAGL1  
SNCA RNF10  
CXCL12 DPP8  
TOPORS UBE2D4  
PGR HSP90AA1  
SLC9A3R1 KCNJ1  
TNFSF12 TNFRSF25  
BRCA1 TUBA4A  
RPF1 HNRNPU  
FBXW11 ATG4B  
IPO11 PHLDA3  
SPTBN2 APC

SLC3A2SLC7A8  
TRIM27GTF2F1  
CTBP2 RAI2  
CAPZA1 PRKAB1  
SRSF6 SRRM1  
PFN1 YWHAZ  
PVRL4 PICK1  
BRCA1 MNAT1  
CD5 CD247  
MPP3 C4ORF14  
IGF2 TF  
KDM1ACTBP1  
MDM2 SEC63  
RAF1 PHKA2  
SUMO2 SRRT  
TOPORS UBE2J1  
PTP4A3 LRPPRC  
PARP1 SUMO2  
STAT5A HDAC1  
MYH10 PRKAB1  
DYNLT1 DOC2A  
HDAC10 NCOR2  
ATP5J2 HAP1  
CCNC MED28  
GH1 PSMB3  
GATA2 STAT3  
CCT6A CTTNBP2  
KHDRBS3 PRMT1  
TBR1 TSPYL2  
HTT SH3GLB1  
APBA1 DLG1  
PRKACA GRIA1  
ATR HDAC1  
VSTM2L WIPF3  
PARP1 PRKAB1  
PIAS1 AR  
TJP3 TJP1  
NFKBIA HSPA1B  
SUMO2 DAXX  
EIF3A EIF3K

YWHAG KCNK9  
NFKB1 HMGB2  
HDAC4 LCOR  
NCK1 PRX  
APOB CALCR  
SMAD4 RAB2B  
SUMO1 PKP1  
APOE CTSB  
NUCKS1 WNK1  
SNTG2 DTNA  
BLOC1S3 BLOC1S2  
WWP2 CPSF6  
NPHS1 CD2AP  
NUP155 CDK4  
TCEA1 GTF2F1  
ITGB5 P2RY2  
MLL RBBP5  
SKIL GOLGB1  
FILIP1L PLEKHA5  
UBE2D1 RNF111  
TYRO3 IKBKG  
AMOT NIN  
RPF1 HNRNPUL1  
GDF9 CCDC53  
DRD2 CADPS2  
ENO2 NAT9  
ANKRD28 PPP6R3  
NES CDK5  
SAAL1 PHLDA3  
PPM1G H2AFX  
RNF10 UBE2E2  
CSNK2A2 PTEN  
MAP3K7 HSPA1B  
PPP1CAPP1R1B  
HAP1 C15ORF29  
CCT4 MAP3K3  
JAK2 PTPRJ  
ZFYVE9 RHO  
SHC1 MLLT4  
PRKCH MED4



RUNX1 FOXP3  
HSPA1L TAB1  
KPNA4 CSE1L  
CCDC85B MCRS1  
DAND5 SFPQ  
PRPF40A SRPK2  
BCL2 FKBP8  
AZIN1 OAZ2  
PTTG1 XRCC6  
EDF1 ATF1  
CBX5 ARL5A  
CFL1 SSH1  
TRAF6 COPG  
HIST2H2BE DNMT3L  
ATR CDC6  
ABL1 RFX1  
SAP30 YY1  
CREB3L2 ZNF182  
TRIM23 FLAD1  
SF3A2 ACIN1  
FKBP6 GAPDH  
RET DOK4  
EZH2 WDR61  
ABL1 PTPN1  
NUP155 TRAF6  
MYOD1 RBL2  
GDF9 MOBKL3  
CPE CHD3  
TGFB1I1 EP300  
ARID1A RPF1  
ACVR1B ACVR2B  
RBBP5 CDC73  
EIF2S1 P4HB  
TRAF6 IER3IP1  
CD5 RASA1  
PHIP STMN4  
PLSCR1 C12ORF12  
NPY NPY1R  
DHX9 SF3A2  
AKT1 EP300

ABL1 CBL  
PKN1 AKAP9  
MET GAB1  
PRPF40A CCT2  
CSNK2A1 BDP1  
GLRB GPHN  
VHL VMA21  
EPB41 TJP2  
F9 LRP1  
CIAO1 ACACA  
GABARAP RPF1  
EEF1A2RIPK3  
TIMP1 SUMO2  
DVL1 CTNNB1  
NOS1 DYNLL1  
TRAF1 TNFRSF18  
PCBD1 EHMT1  
SMAD9 PAPP  
PSMB1 ILK  
TSEN54TSEN15  
SHBG ZC3H12A  
RBL1 DNPEP  
CDK5RAP2 ABCA2  
CYP2C8 LONP1  
DMRTB1 NIF3L1  
GABRR1 SQSTM1  
FAS DAXX  
IPO5 MAP1LC3B  
NR2F1 PHB2  
NFYB CIITA  
ALPI EIF4A2  
STX5 NSFL1C  
KDM1AZNF217  
LRP6 MESDC1  
ORC3 PIK3R1  
SEPT6 SEPT9  
TXN PRDX1  
ESR1 REXO4  
TRIP4 ASCC2  
STK19 SF3B4

SEMA4C NCDN  
RANBP2 HDAC4  
LCK CD38  
HAND2 HEY2  
TP53 RPS27A  
AR CDK9  
HOXB3 CREBBP  
INSL6 POLR3F  
RFXANK HNRNPM  
CDC25C YWHAH  
MED9 MED31  
KBTBD6 OSBPL9  
MAP3K7 MAPK8IP1  
PLK1 TSC1  
LYN SPHK1  
TRAF2 SPG21  
GATA4 NR5A1  
GNA15 GRM2  
ABL1 YWHAG  
VDAC1 DCD  
PLCG2 GAB1  
CEP110 CDK2  
DYNLL1 TXNDC17  
TP53 RPS27A  
RARG RXRA  
PTPRB TEK  
SVIP NPLOC4  
CAD CASP3  
OLFM2 RAB11B  
GRB2 GRIP2  
TLE3 CUL4B  
HSF1 STRAP  
AGRN GF11B  
TROAP TRO  
INADL NRXN2  
CDK2 TAGLN2  
WEE1 CRK  
VAV1 LCP2  
OBSCN MYH2  
GARS CELSR2

CASP3 MAPK8IP3  
TCERG1 SRSF1  
DEPDC1B BRE  
GRB2 PHACTR1  
JAK2 MST1R  
GAS7 APBB1IP  
MED27 MED19  
RAB9A RABEPK  
JAK2 IL23R  
EGFR PLD2  
MAPK3 MAP2K2  
NECAB3 IKBKG  
RNASEH2A USP24  
ERBB2 CSK  
EEF1A2TRAF6  
TGFBR1 TRAP1  
PRKCH PARD6A  
PLD2 EGFR  
PPP1CANOC2L  
SMG7 FGFR3  
ACTB CFL2  
MAP3K10 NEUROD1  
RNF219BRF2  
TBP CTBP1  
TIMP3 MMP14  
SLC2A4AKT2  
TP53 ZMIZ1  
MLH1 TPRG1L  
MYBPC1 TTN  
SEPT7 SEPT11  
ARID4A ARID4B  
LCK CTLA4  
TARDBP NSFL1C  
S100A4 SEPT2  
TP53 BAG1  
PARK2 HEXDC  
WAS WIPF2  
MED31 EPN1  
LATS1 PTK2  
DHPS SRRM2

ACTB RUVBL1  
LMNA FLNA  
TGFB1 EIF3I  
NR3C2 PIAS3  
NFE2L2COPS7A  
PRLR YWHAZ  
C11ORF49 UBQLN4  
THRB EIF3I  
TP53 VRK1  
CEBPB ZNF225  
JAK2 IFNGR1  
GADD45B CDKN1A  
PRDM1 HDAC2  
DSCAML1 PLCL2  
DMD CAPS  
POLR2F MED10  
PDE6D C9ORF25  
PSEN1 NOTCH2  
TRAF6 IRAK3  
SFPQ ZMYM2  
PRKCA TYK2  
FYN CTNNB1  
CDSN UBQLN4  
PGR NCOA1  
PCNA FANCL  
PPP2CAPP2R3A  
PRMT1 TRAF6  
EGFR SLC5A1  
MED9 MED16  
ASCC2 TBC1D17  
ADRB2 USP33  
TMED10 PSEN1  
LSM6 SART3  
XPO1 HNF4A  
UBE2I PHF19  
DGKE SET  
MATR3 CDK9  
GATA3 BMI1  
PLA2G16 UBQLN1  
APC LASS2

ZXDA ZXDC  
IARS MAP3K14  
APBB1 YLPM1  
CDK17 TDRD7  
GLS PARD6A  
PSMC3 VHL  
USP4 LSM2  
USP46 YWHAH  
GLUL TDG  
RASAL1 RAPGEF2  
USP12 SDF4  
TP53 TEP1  
TRAF1 TRADD  
ACTA2 MINK1  
NFKB1 STAT6  
CSN3 EIF3E  
ATP5B SUMO4  
CDK5 PAK1  
EPB41 MYH9  
STAMBP SMURF2  
VCAN FBN1  
FCER1A VAV1  
SUFU BTRC  
ATF7IP HEYL  
IGF1 IGFBP3  
PML UBE2I  
IRAK1 DNAJC14  
EPB41 MYH10  
SLC1A5NEK6  
AXIN1 MAP3K1  
EZR CAPN6  
COL11A2 WDR20  
EIF3G EIF3I  
DLG4 TANC1  
TGFB1 RHOJ  
LCK PRKCD  
PPP2R1A PMS1  
XDH BTN1A1  
MLL TASP1  
SRC NFKBIA

CYP17A1      PPP2R4  
NR1H2 NCOA6  
CBX5 DNMT3A  
TP53 RFWD2  
NR3C1 RNF14  
MEPCE IPO9  
SMAD4 ZMYM2  
SPTA1 SPTBN1  
CFTR VCP  
ITGB3BP      CRELD1  
STRBP THAP1  
GDI1 GNL1  
DLG4 SEMA4C  
APBB1 SF3B1  
CDK1 NES  
ATXN7L1      SSPO  
NTRK2 GIPC1  
CBFA2T2      SIN3A  
PRM1 SRPK1  
EGFR TNS4  
HSPA4 TRAF2  
RHOB PPIG  
CCT5 SUMO4  
HIRA ASF1A  
AURKAINCENP  
ARF6 GANAB  
PTEN RPS27A  
BAG6 SEC61B  
EXOSC5      LSM5  
ELANE YARS  
HNRNPU      EP300  
CTNND1      WDR48  
PLCG1 SH2D2A  
POLA2 DCP2  
TOR1AIP2      COPS5  
NFKB2 MYLK2  
STAM2 UBE2D2  
CCNB1 GADD45A  
ABCF1 PRKAB1  
POLA1 RPA1

EGFR CMTM8  
ENSA CNKSR2  
MS4A2 PTPN11  
LARS IKBKG  
KLC1 MAPK8IP2  
AIFM1 C4ORF14  
SMAD2 SPG20  
ISL1 PECR  
PPP1CAACTA1  
UNC119 C16ORF74  
NME3 PHLDA3  
CBX5 CBX3  
MTNR1A RAP1A  
TP53 EIF2C1  
RAB14 ZFYVE20  
APP CDK5  
RRM2B RAD50  
MAX MXI1  
NUDT21 SIRT2  
SCNN1B STX1A  
GMPS DDA1  
PIK3R1 TLN1  
SMAD9 PKP2  
NDEL1 LUC7L2  
GTF3C1KBTBD7  
SDC2 TGFBR3  
CBL CSK  
HMGB1RBPJ  
SEC13 WNK1  
USP2 LONP1  
RCC1 RANBP1  
MCC CYCS  
PRPF4 KDM5B  
CD2 ITK  
ZNF35 CREB1  
CEBPB SMARCB1  
IL18RAP IL18  
GNA14 CXCR1  
PPP1CBPPP1R8  
GNA14 CXCR2



EPHB1 GRB10  
SIRT2 DNAJB8  
PSMD3 NFKB2  
MDFI SPG7  
MAPK1 SH2D3C  
MCC PPP2R1A  
EXOSC10 CIB1  
PHF2 RBPMS  
DHX33 USP36  
NID1 LAMA1  
SFN MARK1  
CEP110 MAP3K4  
PRKCSH GANAB  
SRSF1 YTHDC1  
CEP63 C19ORF50  
BAX SH3GLB1  
ATG12 HNRNPA0  
TRAP1 EXT1  
PARP1 HSPA2  
TLR4 IRAK2  
INSIG1 AMFR  
PAX7 CRK  
ESCO2 HDAC2  
EIF3B RPS6  
DLG3 EXOC7  
RPL11 NEDD8  
RB1 KDM5A  
CHAF1A LZTR1  
RB1 ARID4A  
TNNI3 LYST  
GNB5 EIF3J  
RANBP2 KPNA1  
MTNR1A GNB1  
YWHAE YWHAH  
CDH1 CSE1L  
CUX1 ELAC2  
YWHAE MST1R  
UBE2I GOLGB1  
USP11 SETDB1  
JUND JDP2

FGFR3 SH2B1  
CRY1 MDFI  
SUMO2 NUMA1  
RELB DAXX  
PNN SRRM2  
KIF5B NCOA2  
INSIG1 SCAP  
BCL10 PRKCQ  
INSIG1 SREBF2  
ATM HNRNPUL1  
AKT1 MTCP1  
AKT1 TCL1A  
BLM RMI1  
NR3C1 PPARGC1A  
PDE6D HRAS  
MATN2 ATXN1  
TP53 ZHX1  
EPS8 AIMP2  
FCHSD2 CCT2  
TERT SMG5  
HNRNPR GRB2  
MAP1LC3A MAP1LC3B  
WAS RAC1  
ZBTB11RAPGEF2  
PLCG2 ITK  
CD4 DPP4  
CBX5 CHAF1A  
CBX5 CHAF1B  
NR2C1 HDAC4  
RAMP1 CALCR  
PFN1 UNC119  
SF3B1 GSK3B  
TRIM37LTBR  
GABARAP BRP44L  
SOS2 PACSIN3  
HNRNPA2B1 CDC42  
RIPK1 MAP3K3  
NCL ARRB1  
DNM1 MED31  
VWF CALR

STAT3 STAP2  
NOS1AP NOS1  
SOS1 STK39  
PDPK1 MAPK8  
MYH10 RIPK3  
PRPF31 CTNBL1  
TP53 TLL5  
CCKBR PTPN11  
TGFB1 ENG  
NFKB1 ZFP36  
PARP1 THRAP3  
LONP1 MAST1  
CRMP1 ARL15  
CBX4 MLL  
FNIP1 GABARAPL1  
RPS14 RBBP6  
MDM2 NDUFA12  
ENSA RAP2A  
EEF1D CALM2  
TSC2 TBC1D7  
CDK5 STX1A  
CRMP1 SMPD3  
MMP1 MMP7  
SIP1 SRSF4  
BMP2 ACVR1  
KPNA4 RCC1  
SMC1A CAMKK2  
COL4A5 RNF10  
CD151 RPS27A  
SRF TCF3  
PTN TBRG4  
MRPS12 UNC119  
MAPK1 RPS6KA2  
GNAQ BTK  
DFFA YWHAZ  
KHDRBS3 COBRA1  
PLCG2 JAK1  
ZEB1 CTBP1  
ESR1 MED16  
BCORL1 HDAC5

TP53 RPL11  
NSF ARRB1  
BNIP3 BNIP3L  
SUMO2 HP1BP3  
CCNT2 MEPCE  
UBE2E1 LRSAM1  
ABL1 C3  
RBBP7 TOPORS  
TNFAIP8 PTP4A2  
ZBTB16KRTAP4-12  
FER IRS1  
PCBD1 GORASP2  
CSN3 MAPRE1  
KCNQ3 KCNQ4  
CELF1 MBNL1  
EMD FATE1  
SUMO3 SENP2  
POLR1B RRN3  
UBC COMMD1  
PDGFRB PIK3R3  
MKNK1FHOD1  
FYN DAG1  
ERP29 PTK2  
THRA SRC  
MLLT3 EEF1A1  
ATP5J2 FTSJ1  
PVR CD96  
TP53 EIF2C2  
DDX21 LYAR  
AKT1 MXD1  
H3F3B CREBBP  
ORC3 VAV1  
FTH1 UBR1  
CCL5 DARC  
ITCH UBE2E2  
EXOC3 GRIN2B  
SEC13 ARF6  
SIRT2 HDAC6  
TRAF2 TAB2  
EXOSC9 CHMP4B

TKT MYOC  
ARIH2 PTN  
YWHAB SAMD4B  
DHH PTCH2  
PDGFRB CAV3  
PFDN1 ACTA1  
LRRC14 COPS6  
UBR5 TCEA1  
CUL1 MYC  
RSRC1 UTP14A  
ATP5A1 ATP5C1  
MCM4 MCM7  
MCM4 MCM5  
DNM1 MOBKL3  
CTNNA1 TLN2  
MED1 MED12  
SYNJ2 RAC1  
SNW1 NOTCH3  
GTF2B TRAM2  
FGFR1 KPNB1  
PLK1 SRPX  
TERT MTOR  
SENP6 RUVBL2  
RPS27ADAXX  
TARDBP ZHX1  
PPP1CCHDAC1  
ITGB7 PRKCD  
PAK7 TUBGCP4  
PMS1 RNF123  
KIAA0776 UBE2D1  
ACVR1B BMPR2  
ATG7 MAP1LC3A  
STAM2 TYK2  
NINL EWSR1  
RAPIA RASGRP4  
DDX5 VHL  
SFN USP8  
FCGRT B2M  
MCM2 ATR  
BAI2 HDHD2

EGFR ERBB3  
MAP2K4 DUSP22  
TUBB4 TJP1  
CAPN1 MYBPC3  
TRIP13 KRTAP3-2  
PPP2R5A NEK1  
GPRASP1 GLYAT  
LZTR1 ZNF490  
SNCA CSNK1D  
BCL2L11 BTK  
HGS BEGAIN  
PRKCZ FRS2  
ATP5B GRB2  
NCK1 CHR1  
PPM1A SGOL2  
HSPA1L TRAF6  
PCNA SETDB1  
XRCC5 POU2F1  
PEX12 PEX19  
STRN ESR1  
SNAP23VAMP2  
SCRIB TSG101  
GF11B PICK1  
CXCR2 GNA15  
ZC3H11A MLH1  
PRMT1 LGALS12  
GTF2I WNK1  
CDKN2A ALS2CR8  
SATB1 CHD3  
CCDC85B MOAP1  
PCNA POLD3  
NFASC FYN  
HDAC2 HDAC10  
LYN PLAUR  
STAT6 ZNF407  
RNF10 UBE2O  
TPD52 MAL2  
RUNX2 HES1  
FAM40A ZRANB1  
PIK3C2A MAP1LC3A

MAGEA11 MCRS1  
CSTF2 CDC73  
ARIH2 TP53  
INSL6 BOC  
PARK2 EP300  
TADA3 FAM107B  
PSMD14 PSMA3  
MNT MAD1L1  
HAT1 IPO4  
FANCA TPT1  
COL4A3 COL4A3BP  
SNAP23RAC1  
IRF7 TRAF6  
TADA3 TAF10  
LCK PTPRM  
PRPF40A PCBP2  
SMAD9 KAT2A  
SMAD9 KAT2B  
LMNA ACTB  
SHMT2 IKBKE  
MRPS22 NFKBIL1  
ATXN1 KLHL12  
STX6 SNAP29  
CCL2 CCR10  
RET SHC3  
MEP1A MEP1B  
PRPF40A SF3B3  
STAU1 NCL  
NID1 LGALS3BP  
HSPA1B APEX1  
GLB1 DNAJB1  
NR1H2 PSMC5  
PCNA KIAA0101  
RPS27A NFE2L2  
HNRPDL ATIC  
DPM2 HLA-DMB  
EIF3F EEF1A1  
PLD1 RHEB  
MYL9 CDC42BPA  
ANAPC5 FZR1

ABCA1 PLTP  
RB1 NCOA6  
CCDC85B EXOC7  
EPB41 DYNLRB1  
SEMA3B SEMA3A  
PRKCZ FEZ1  
PSMC5 MYO18B  
RPS27A KIF23  
NCR3 CD247  
RPS27A CNTN2  
UBE2H HDAC6  
POLR2C C14ORF1  
POLR2E POLR2H  
TLE3 PIN1  
RAB33A RTN4  
BMP6 SOSTDC1  
MDFI C16ORF48  
KIF5B PRKAB1  
VDAC1 SNCA  
RPS6KA5 HIST3H3  
PRKCA APLP2  
GRIN2D HSPA1B  
TP53 NDN  
XRCC6 ILVBL  
ZMYM4 ZMYM2  
VAV1 CBLB  
PCID2 NEK6  
TP53 KLF6  
SLC38A1 FAM176A  
CTNNB1 BCCIP  
LRP8 APBA2  
EP300 FBXW2  
PCBP2 SRSF7  
GLUL PLEKHF2  
MAPK8 FHOD1  
NPPA NPR1  
BCL2 BECN1  
SOCS3 NONO  
MAVS TRAF6  
MYCBP CPNE1



KRT14 KRT5  
TP53 COPS8  
ULK1 G3BP1  
EP300 SIRT2  
HNRNPA1 HNRNPK  
SMAP2 TRRAP  
LMNB1 NDEL1  
NCOA1 SRA1  
ATF7IP2 MBD1  
EP300 BCL7B  
MED9 MED19  
GLE1 UXT  
CLSTN1 GTF2F2  
PRKCA NOS1  
MDM2 KIF5A  
EED ITGA4  
ZNF250 CCDC85B  
SMAD4 NOTCH4  
MEF2D AGAP3  
ZNF263 PLEKHF2  
BRCA2 ATM  
ZNF426 EFEMP2  
HTATSF1 SNRPB2  
BCL2L1BBC3  
GRAP2 STAMBP  
ANKHD1 MAP3K2  
MAGED1 NUP205  
PTPRD PTPRE  
RAD21 STAG1  
PEX19 PXMP4  
CHD3 SAFB  
TBP GTF3C4  
ZFYVE9 RBBP6  
BCR RHOA  
TRAPPC3 TRAPPC4  
SUMO2 MEF2D  
BRCA2 SKP2  
ASCC3 ASCC1  
MAP2K7 GADD45B  
MYC ARCN1

NOS1 BDKRB2  
CHAT CAMK2A  
POLR2C INTS6  
H3F3B CBX2  
CXCL11 CCR3  
FYN IRS1  
SLC9A3R1 SLC22A5  
UFM1 UFC1  
SUMO2 MUS81  
WEE1 SKP2  
MPG HSPE1  
EP300 TBX21  
TCERG1 WASF2  
BTK PRKD1  
TRAF2 NECAP2  
VAV1 IL6ST  
EPPK1 GSTK1  
RAB11FIP3 ARF6  
EIF4A3 OTUB1  
HSPB1 C7ORF64  
BCAP31 BCL2L1  
PPP1CAMYO16  
THRB RXRA  
LMO4 HDAC1  
CAPZA1 IKBKG  
GABRDUBQLN4  
HRAS RASA1  
MYC HIF1A  
EIF3H EIF4G1  
UBQLN4 ATPIF1  
HNRNPA1 RRP1  
HTR2C GNAQ  
CCNC MCM2  
EXOSC6 DNAJC30  
PSMD10 MDM2  
MMAB MTRR  
CACNB3 CACNA1B  
FOS GTF2F1  
CDC42 MAP3K11  
GNRH1 MEP1A

PRMT1 MED31  
RAG1 KPNA1  
MCC ERP29  
KIF5A NCOA2  
GRB2 UBE21  
CTNNB1 LEF1  
TAOK1 MARK1  
FYN PAX7  
MAP2K7 MAP3K7  
NFKBIA MCM7  
TBXA2R GPRASP1  
NFKBIA MCM5  
ITPR3 TRPC5  
NTRK1 CRK  
TGFB1 UBE2Z  
MED14 MED1  
PFN2 DDX11  
GNS GRB2  
SETDB1 TRIB3  
UCMA DPP4  
ASCC2 FAF1  
GLI3 YWHAE  
INPPL1 C17ORF28  
GRB2 ACTG2  
ECD NR3C1  
RAB5C SUN2  
TECPR1 ATG5  
SUPT5H POLR2C  
MTPN IKBKE  
MAP4K4 HIST2H2BE  
NFKB2 TIMM50  
PAXIP1 ASH2L  
WDR5 HCFC2  
SH2B2 AKT1  
EZR PRKAB1  
PPL EZR  
CASP3 RAC1  
BMPR1B BMP6  
PML PLAGL1  
MEN1 DBF4

UBE2I SP3  
HDAC2 SMARCE1  
TP53 COPS3  
PLCG1 MEPE  
SUMO2 CHD4  
UFM1 PRKAB1  
MCM2 PHC2  
PRKCG CDC42  
AP3D1 ARF1P1  
SYNCRIP PCSK7  
H3F3B CHD4  
PIK3R1 DNMI  
POLR2L MED29  
AKR1A1 EXOSC4  
PRPF4 PRPF6  
MYBL2 LIN54  
CREG1 TBP  
PPP4C SMEK2  
EGFR NCAM1  
RBPMS STRBP  
ERBB2 PTPRJ  
TGFBRI FNTA  
UBE2D3 RNF167  
GRIN2A IL16  
MED7 ZSCAN1  
ZNF165 CCDC85B  
LRPPRC NEK6  
CASK PARK2  
HOXC11 GTF2A1L  
MCC CMPK1  
CYP27B1 SIN3A  
MCC ECHS1  
PLSCR1OGDH  
WWP2 WBP2  
MID1 MID2  
GJB1 PRKACA  
MSH4 RAD51  
SPRY2 CBLB  
CXCL1 DARC  
STAT3 HIF1A

PIN1P1 MAPT  
MAPKAPK2 LYAR  
TAF1 SMARCA2  
NDC80 SKA1  
HIST1H3I BCCIP  
FYN ADD2  
PTPRG DLG4  
PRPF4 LSM7  
ESR1 TRIP4  
PLCG1 PTPRJ  
ITGA5 FLT4  
MAP3K2 FAM32A  
SRP72 HNRNPA1  
ARNT BRCA1  
MYC TAF9  
ARRB1 MDM2  
DNM1L GSK3B  
RIPK1 TIMM50  
UTRN ACTA1  
DLG4 KIF13B  
KIF1B LASS2  
CD99 UBE2H  
GRIN2D RAP2A  
PHLPP1 WDR48  
ESR1 MED1  
HTR2A NME3  
RAF1 ACTN2  
GRIN2D PPP2R2A  
LRRC4C NTNG1  
ATP5C1 MED15  
EIF3D EIF3E  
LCK CDC42  
FTH1 TOLLIP  
PRKDC NCF4  
PNP TP53  
PLCG2 PIK3R1  
RPF1 NDFIP1  
ATM FANCD2  
TP53 MPHOSPH6  
MYC POLR2B

CANX SERP1  
GH1 SARS  
WEE1 YWHAZ  
ACAA2 YWHAG  
CDK2 CNOT7  
TP53 HIPK1  
PRNP GRB2  
FYN PAX3  
TFCP2 MAP1A  
TAPBP HLA-A  
ARF6 AP1B1  
TRIM28IKBKG  
VAV1 SLA  
TCERG1 CHD8  
HSP90AA1 GUCY1B3  
HERC2 DISC1  
PTPN6 KDR  
SRC PRKCE  
LOXL4 MAST1  
PCBP1 MAPK6  
C8ORF41 RUVBL2  
DPP4 CCL11  
IL1A IL1R1  
NUDT19 ARL3  
PRKCG PARD6A  
PLCG1 TCF7L2  
FIBP FGFBP1  
XRCC5 LIG4  
MMRN2 DAXX  
U2AF2 PIN1  
PRPF40A SF3A1  
UBC RNASEH2A  
GYG2 GYS1  
GOT2 CTNNBIP1  
COPA SLC25A11  
CDK5 CDC37  
YWHAG C1QBP  
TP53 HSPA4  
TP53 HSPA1L  
MEN1 ASH2L

DLG4 GRIN2C  
RBCK1 UBE2D4  
CCDC85B SYTL4  
DOK2 IL4R  
LZTR1 TRIM5  
CAPN2 ADRBK1  
MDFI CLPB  
TIA1 DCP1A  
TRAF2 FBXO28  
NAA38 SNRPD1  
CD247 LY6E  
LYN PTPRC  
RASA1 PAG1  
ZNF276 ZBTB8B  
SEC16ANFKB2  
AGTR1 ZBTB16  
JAK1 GRB2  
NAA38 LSM3  
NAA38 LSM6  
SRC KRT10  
LSM6 LSM2  
RAD21 CHTF18  
CANX IKBKG  
NCOR1 PIAS1  
UBC PRKCA  
EEF1D KARS  
TCEB3 REXO1  
GTF2A1 TAF5  
TNFAIP3 YWHAG  
SEC63 GSTK1  
KDM1AZMYM2  
PAK2 SH3PXD2A  
HRK BCL2L2  
RELA TUBB2B  
DNM1 CABIN1  
HLA-G HLA-A  
FBXW4 MAST1  
OPTN MACF1  
NPM1 CNBP  
FGFR1 ERBB3

LIMS1 MBIP  
HSCB BBS4  
NCK2 HNRNPK  
SAFB2 MAP1LC3B  
GRIA3 SQSTM1  
STEAP3PKMYT1  
COPS6 DCAF11  
TAF6 SH3KBP1  
ITGA8 NPNT  
HSPA9 NFKBIB  
PEX19 PEX16  
WDR48 WNK1  
BRD1 ING5  
ACTG1 NFKB2  
UBE2N RNF168  
GNA11 RGS3  
SPAG9 ARF1P1  
TIRAP TRAF6  
CLU CLUAP1  
CIAO1 TRIM28  
PRKCB AFAP1  
RHOG ECT2  
PIK3R2 AXL  
ARIH2 ARAP1  
NFKB2 HSPA1B  
TRIP13 PARK2  
FXR2 PCBD1  
EIF4E2 KRTAP4-12  
ATF7IP MED4  
PPP2CBSTRN4  
EWSR1 MVK  
ARPC3 OTUD5  
IRF1 NFKB1  
LGALS3 CSNK2A2  
ARPC5 NR3C1  
MAPK1 PTPRR  
DNAJB1 STUB1  
PRPF40A SF3B4  
FANCA TCP1  
GPRIN2KRTAP4-12



SKIL HIPK1  
HSPA1L RIPK3  
APC POM121  
HSP90AA1 CALM2  
SUMO1 SIN3A  
PRPF40A SF3A2  
ZCCHC10 STAC3  
SMAD9 EVC2  
CCT3 PPP2R2C  
TRADD TRPC4AP  
SSSCA1RNF115  
USP46 DMWD  
SNRNP70 CEP63  
KRAS HNRNPC  
IQGAP2UBAC1  
FGFR1 PLCG1  
RXRA ITGB3BP  
TRAF3 TBK1  
E2F1 KLF6  
MAFG MAF  
YWHAG YWHAE  
RBM23 SRRM1  
SRC CEACAM1  
FXR2 TRIM29  
CDK5 LMTK2  
ANXA7 PAX8  
TAF6 SMARCA2  
KHDRBS3 HNRNPC  
E2F1 NDN  
HNF4A NR0B2  
FASLG ARHGDI  
TPM2 ACTB  
RAB4A RUFY1  
NR2C1 NR2C2  
FCHSD1 ITSN2  
TUBB TAOK2  
ANPEP TM4SF1  
MTHFD1 ARF6  
CD79A BLK  
FAF2 SEL1L

WDR5 IKBKG  
S100B ANXA6  
PRPF8 SND1  
PAX3 RPS27A  
PLXNB1 SEMA4B  
DPEP3 BCL11B  
EZR RAPGEF2  
EIF4B USP7  
MAPK1 MAPKAPK2  
PIK3R1 PALM2  
TRIM21NCOA1  
KCNH4 EMX1  
UBE2L6 ARIH2  
ATF3 FGFR3  
NR4A2 ZCCHC17  
HLA-A CANX  
GJC1 TJP1  
CUL2 COPS6  
MED6 MED26  
PAX3 GRB2  
EIF4G1 HNRNPD  
ZZEF1 PTPN4  
IL2RA CD4  
EP300 ANAPC2  
IRF7 MAFB  
BNIP3L BCL2L1  
EP300 ANAPC5  
NPAT CREBBP  
PRPF40A RNPS1  
SRP72 CASP3  
GRB2 NEU3  
HIST1H4I PHF20  
MDFI TRPV6  
IGFBP2 INO80B  
SERBP1TOPORS  
TLR5 SIGIRR  
APOB PPIB  
SUV39H2 EWSR1  
C20ORF24 PTPLAD1  
CCT5 TRAF3IP3

E2F1 SPIB  
RAD1 POLB  
PRKACA CETN1  
MDM2 DAXX  
SMAD7 TTF2  
TP53 PPP1R13L  
BNIP3L MAP1LC3A  
STOM ACCN1  
ACTB GNA12  
JUP TCF4  
RRM2 TSG101  
STAMPB CHMP1A  
BAG6 ATXN2  
IFT20 TRAF3IP1  
SRC EFNB2  
NPM1 HIST1H4I  
APC TRIM56  
NFKB2 HDAC5  
SETDB1 ORAI2  
TBP E2F1  
IPO8 EIF2C3  
CD4 NR3C1  
DIAPH1RPF1  
POLR2C ERCC3  
MED26 POLR2C  
EZR TRAF6  
MED26 POLR2E  
ZW10 BRF2  
OLFM2 RPS6  
BAG6 FAM173A  
PIK3R1 DLGAP4  
TGFBR1 RHEBL1  
SYT1 SNAP25  
DGKZ SNTG1  
SERTAD2 KAT2B  
NCOA1 SMARCE1  
CSNK1A1 OCLN  
NGF NGFR  
RELA KCTD12  
TP53 STUB1

PDE6D RASA1  
EP300 LEF1  
HDAC1 E2F4  
PTPN2 JAK1  
P4HB ERO1L  
RPA3 PAK7  
EP300 ING1  
PLCG1 SH2B3  
STAT1 HSF1  
ANXA2 MLH1  
SMAD9 SMAD4  
EDNRA HDAC7  
UNC119 PPA1  
FRS3 FGFR1  
CDH12 CDH7  
SMARCA5 SATB1  
VAMP2 RABAC1  
FANCA FANCE  
MAPK8 DUSP10  
HTATSF1 SNRNP70  
UBR5 PAIP1  
PIK3C2A PMS1  
KIT BTK  
PPP2R1A PDCD10  
LRP6 FZD8  
NCOR1 SMARCB1  
ARHGDI1 BID  
TP53 ING4  
UBQLN4 UBQLN2  
EXOSC10 MPHOSPH6  
SKIV2L2 EXOSC2  
ESR1 TRAM1  
BMPR1B BMPR2  
RRAS NCK1  
ARPC2 SF3B3  
PRKCB CD5  
PLCG1 ARHGEF5  
KRR1 EWSR1  
CSNK2B GADD45GIP1  
THRA EP300

NFYA NFYC  
KIAA1279 ATXN2  
ZNHIT1 ACTR6  
CDK2 CDK6  
TRIM21 IRF8  
MED7 MED22  
IAPP COL25A1  
HNRNPA2B1 MEPCE  
LMNA RB1  
MAP3K7 TUBB2B  
PRKCA SHC1  
PRKCA PTPN6  
PIAS2 ZBTB4  
TSEN15 TSEN34  
EEA1 RABEP1  
MAPK3 DCC  
CSNK2B WDR48  
SDC3 FGF2  
DNMT1 TSG101  
CASP8 IFT57  
TP53 FBXO11  
HAP1 UTP3  
COL4A4 ANTXR2  
SRSF4 PNN  
EZR S100P  
PRELP NID2  
SOCS3 TCEB2  
LDOC1 POLL  
GSK3B SMARCA2  
WDYHV1 PLDN  
RAB27A MYRIP  
NCK1 ABCG5  
COL1A1 TMPRSS6  
EXOSC10 MAP3K14  
GPC1 MAPK14  
PTBP1 CASP3  
TP53 BARD1  
CAPZA1 CD2AP  
HIST1H2BB EP300  
SOCS3 TCEB1

JUP DSC1  
TNK2 RASGEF1C  
MBL2 CALR  
MAPK1 BLVRA  
CREG1 RB1  
NR3C1 NR2F2  
ZSCAN30 SUFU  
JAK2 VAV1  
SUPT3H TADA1  
SCRIB MAP3K3  
TP53 CDC14A  
KPNA1 LYAR  
MED12 MED9  
HNRNPA3 SMAD2  
POLR2C POLR2L  
GNB1 HDAC5  
TRAF2 THAP7  
GNAI1 KLHL3  
ZBTB7B ZNF277  
NCK1 DUSP15  
BMS1 USP42  
FYN BCAR1  
TCP1 TRAF3IP3  
BMPR1B GDF5  
BMP2 NOG  
CHRD TWSG1  
SYNCRIP HNRNPA1  
CBFA2T3 RUNX1T1  
STAT3 ZNF467  
KPNA1 PAX5  
SLC38A1 CHD3  
KDM1ADPEP2  
CSNK2B FAF1  
VAMP4 PACS1  
RPL5 CSNK2B  
HTR1B GSTK1  
ATP5L HLA-B  
MASP2 FCN2  
NONO TOPORS  
ANKRD28 PLK1

EXOC6 LOXL4  
AGT ENPEP  
MAPK13 MAP3K4  
PDX1 NEUROD1  
SOX6 HDAC1  
GRINL1A MYO9A  
POLR2H MED29  
MMP2 BACE1  
DCN PLA2G2A  
IRS1 YWHAG  
TRMT61A TRMT6  
TINF2 TERF2IP  
PAAF1 UCHL5  
EIF3B RPTOR  
MAPK14 DDX26B  
RANGAP1 TMBIM4  
SLC24A1 PIK3R1  
STAT1 ZNF467  
PIAS1 SMAD4  
WDR62 INSL6  
EIF1B LARP1  
KLK7 CDSN  
HIST1H4I HIRIP3  
XRN1 UPF2  
CBX7 HDAC2  
PML RFC4  
IL1B PRTN3  
USP19 CAMK2G  
RPS6KA5 MAPK14  
AMFR UBE2W  
AURKAKIF11  
MEF2D LENG8  
SPP1 ITGA9  
TRPC7 TRPC6  
FBXO27 STUB1  
MEN1 NFKB2  
PRPF40A CCT4  
INSR CSK  
CSNK2A2 GTF2A1L  
UBE2D1 RNF38

IARS MAP3K3  
ORC3 SHB  
TAGLN GIPC1  
APBB1 DHX9  
DNM1 CLIC4  
NFKBIA IKZF4  
TRIM27FXVD6  
DNM1 SNX9  
SERPIND1 ELANE  
C20ORF94 ERCC4  
CXCL13 CCL19  
SUGP2 LZTR1  
CLOCK KAT2B  
CBX7 RING1  
BMP4 BMP8B  
APC SREBF2  
SAFB SRRM1  
PRKACA AKAP8L  
RELA PPARA  
HSP90AA1 RUNX1T1  
RPF2 G3BP2  
EIF3F CCNA1  
NUDT18 RAB3IL1  
TH1L WHSC2  
DAND5 NFYA  
SERPIND1 CTSG  
MAPK8 ETV1  
ESR1 NCOA2  
NEFL MTMR2  
PLCG1 GAB2  
RAB27A COPS6  
EPPK1 TSC22D1  
IRS1 MAPK9  
IRS1 MAPK8  
XRN2 DISC1  
GSN PTK2B  
ADRBK1 PRKCD  
STXBP3 DDX20  
FRMD5 TH1L  
INSR PTPRF



IGF1 TF  
ARPC2 SF3B4  
TCEB1 COMMD1  
VAV2 DNAJC21  
NCOR1 HDAC4  
HDAC4 SENP1  
ARR3 CSNK2A1  
SYN1 CAMK1  
MET PTPN3  
SLC25A4 PPID  
HDAC3 RUNX1T1  
AMBRA1 ATG3  
STMN1 HLA-B  
SRC EFNA5  
PCNA PPP1CA  
EGFR CEACAM1  
TK2 YWHAZ  
DEGS1 TSSC1  
YES1 MED28  
GTF2E1ZBTB9  
STAT5A PRMT1  
MC5R MRAP2  
ESR1 TAF1A  
KPNA1 MEPCE  
NCK1 KIF13A  
RAD51L1 RAD51C  
PPL USP7  
RAC1 ARHGAP44  
PRKACA KCNH2  
ATRX NEK1  
CHN2 RACGAP1  
EGFR KRT18  
BMPR1B DCAF7  
SMG6 SMG5  
TH CSNK2A1  
NPTX1 PLXNA1  
RBPMS ZNF581  
NDUFA7 STARD9  
RUNX2 MAP3K4  
E2F1 ATR

EP300 CTBP1  
RNF8 UBE2W  
EPRS TH1L  
HSP90AA1 EIF2AK2  
XRCC1 APEX1  
AFTPH GGA3  
RNF144A UBE2L3  
NCOR2 NCOA3  
RGS2 DYNLL1  
PDCD6 PLSCR4  
TGFB1 OSR1  
POLR2L MED10  
CTNND1 FYN  
UFM1 UBE2D4  
CACNA1H KCNMA1  
PRKCA AFAP1  
EIF3G MPHOSPH6  
CRKL ERBB4  
SMAD3 MYOCD  
HIST2H2BE BAZ1B  
SYVN1 SEL1L  
HLA-B ARHGEF4  
PLK1 DCTN1  
CPSF3 GSTK1  
INSL6 CCDC106  
TLR4 RIPK2  
CXCR1 CXCR2  
CLK2 TOPBP1  
IFI35 BATF  
CRYBB3 CRYBA2  
PRKCH PTPN11  
SOS1 SH3PXD2A  
SMAD6 SMURF1  
MAX DYNC1H1  
PHGDH SUMO4  
SMARCC1 CARM1  
E2F1 TEAD3  
UBQLN4 CYB5R1  
YWHAB TUBA1A  
LYN PAG1

UVRAGSH3GLB1  
LRPAP1 SORT1  
PIP5K1C TLN2  
MAP2K5 SQSTM1  
POU2F2MNAT1  
DVL2 TRIM29  
SAFB2 RB1CC1  
PIK3CDHRAS  
TCHH EFHD1  
DLG4 SEMA4B  
CEBPB CEBPD  
VEGFA ADAMTS1  
RAD51L1 XRCC2  
TP53 SETD7  
FCER1A ITIH2  
LMNA CDK1  
PHC1 RING1  
BCL2 CAPN2  
CTNND1 LCK  
APBB1 CPSF7  
TP53 VRK2  
OGFR GSTK1  
NDUFA9 SIRT3  
SS18L1 RLIM  
TRIM27TRIM32  
RBX1 CUL1  
RBX1 CUL2  
RBX1 CUL3  
RBX1 CUL4A  
EDNRB GNA13  
NPHP1 ASAP1  
CECR6 KDM5B  
SIPA1L1 DLG4  
ZNF440 PJA1  
NCOA6 MLL3  
PTPN13 PLEKHA1  
KCNA2 KCNAB1  
EIF4G1 EIF3A  
MCM7 VHL  
RPF1 TTYH2

HNRNPA2B1 MAP3K2  
LGALS2 TUBA4A  
NVL TTF2  
C11ORF83 PHLDA3  
EIF4G1 IKBKE  
PKLR OTUD5  
KDM1APRDM1  
MLLT10 SS18  
PLSCR1FBXL18  
CMYA5DTNBP1  
BMI1 ZBTB16  
MAPT MARK1  
DAPK1 MIB1  
CACNA1H KDM5B  
PLSCR1ILF3  
RAB3GAP1 GSTK1  
PTPN13 PLEKHA2  
SMAD2 PIAS4  
CIR1 NCOR2  
CTBP1 FOXP2  
CYP2C18 ECSIT  
EIF1B HMGB2  
UBTF RRN3  
SMARCB1 SMARCC1  
ATM TDP1  
MAP2K7 MAP3K13  
LYN MME  
TRAF1 TRAIIP  
ITK SH2D2A  
CBL SH3GL2  
MYC POU2F2  
CDC42 ARHGAP29  
ZNF165 ZNF192  
SLC9A3R2 SLCO3A1  
CBL SH3GL3  
CXCR4 GNA13  
PAX9 TRIP4  
APC PPP1R13B  
CNN1 PRKCE  
BCL2 PRKACA

PLCG1 CAMK2A  
SAMSN1 PILRB  
E2F1 HDAC1  
CDK2 SPDYA  
CALM2 GRM4  
HSP90AA1 GUCY1A2  
CALM2 GRM7  
UBE2I NR1D2  
CALM2 GRM3  
TRIP13 CARD14  
CYFIP2 PACSIN1  
HSP90AA1 SLC34A1  
RBL1 SUV420H2  
CKAP5 MEPCE  
LMX1B TCF3  
HSPA9 TAB1  
MAPK9 TOB1  
PDE4A AKAP6  
RUNX1T1 C19ORF57  
JUP DSPP  
MLLT4 PVRL3  
RPA1 RAD9A  
B3GNT1 LARGE  
FYN FLNC  
DNM2 SHANK2  
CTNNB1 CARM1  
RPL11 NFKBIB  
IKBKB CASP8  
IGBP1 CCT2  
CAPZA1 RIPK3  
NCL PRKCZ  
RNF103 UBE2Z  
NKTR RNPS1  
RAB5C RABAC1  
EZR ACTC1  
UNC119 PAFAH1B3  
SPTLC1 SPTLC2  
EPB41 ECHS1  
QTRT1 COPS6  
MAPK1 PEA15

HSP90AA1 SIN3A  
ASS1 ASCC2  
SOD2 RAB4A  
PRKCA ADRBK1  
IRF5 IRF3  
NEK9 MAP1LC3B  
ITGA2BCLNS1A  
YTHDF1 ITS2N2  
HMGB1 PPP2R3A  
PSMC5 PSMD1  
SETDB1 SIN3A  
TUBG1 SPATC1  
DLGAP1 PLCG1  
TIMP2 RANBP1  
SNRPD3 STRAP  
ERCC3 GTF2H5  
EIF3H PRKAB1  
SLC16A1 TRAF6  
MED12 MED29  
JUP MUC1  
PPP1CCTP53BP2  
DCAF7 DDB1  
COIL CEP76  
TGFBR1 RPAP3  
RBX1 CUL4B  
PDIA3 LOXL2  
EPB41 PEBP1  
PAK1 SMAD4  
ABL1 CNTFR  
NOL3 TFPT  
CRMP1 DDX18  
HNRNPF RBFOX1  
CCDC85B GCC1  
PRMT5 SMARCA4  
RPL35A TRAF6  
ZNF512B INVS  
PRMT5 SMARCA2  
HTRA2 TRAF2  
FYN CDK5  
STK25 FAM40B

SKIV2L2 TAF10  
USP39 PRPF31  
TMEM33 PSMD6  
PIK3R2 GRB2  
KRT35 USP15  
EPB41 RAB8A  
ABL1 ORC1  
CCDC85B SMARCD1  
RAE1 SMU1  
RARA JUB  
ADRB1 MAGI1  
KCNJ2 INADL  
KRT18 EXOC8  
TAL1 LMO1  
RAE1 TJP2  
ATXN7 TAF10  
HIP1 APAF1  
FCGR2B C14ORF1  
TRIM27UBE2D3  
VHL TXNDC17  
TP53 TP53TG1  
NDUFB10 HTR2A  
ERBB3 PTK6  
EPB41 RAB2A  
CRCP CALCRL  
SP5 NKX3-1  
TXK TH1L  
RBL1 ID2  
CREB1 UBE2I  
MLLT4 TJP1  
RELA EEF1A2  
ESR1 CRIPAK  
GTF2F2 STK38  
MEF2C LRRC37A3  
NCK1 APOL5  
FLNC SGCD  
PTPRN SNX19  
RAN SPAG8  
EIF2S2 EIF2B1  
SYNCRIP CSDE1

LNK2 UBE2Z  
FOXN3 EXOSC8  
XIAP UBE2J2  
GH1 CYCS  
PGAP3 PER3  
RAB3D AKT2  
BRCA1 FHL2  
GAPDHS SH3BP4  
ABL1 ADAM15  
NSF LUC7L2  
RFC2 RFC1  
BIN1 CACNA1C  
BCL2 BMF  
RAB3D AKT1  
LYN PLCG1  
PLSCR1C16ORF48  
PPM1F CAMK2A  
KDM4AWDR48  
MRPL49 OXA1L  
ITGB5 TLN1  
CCNI CEP63  
EGFR ELF3  
SASH1 SFN  
PSMA7 HLA-B  
SREBF1TWIST2  
EEF1A2IKBKG  
SOCS7 EGFR  
VHL SAT2  
DDX3X RAD51C  
ORC3 SLA  
MEPCE MAGED2  
H2AFJ PHF14  
CCT5 STK24  
YWHAB NCKAP1  
C14ORF139 LUC7L2  
MYC NOL9  
RAC1 ACO2  
ERCC5 GTF2H1  
RPA3 MRFAP1  
NEDD8 TRAF6



NFKB1 NACA  
E2F3 USF1  
RFC2 GTF2F1  
PCBD1 LRP1B  
MEN1 MLL  
ARPC5L ACTR3B  
RPA1 BRCA1  
TAF10 TAF3  
BCL2L11 BCL2L2  
CASR RPS27A  
SCFD1 DKKL1  
PRKACB PKIA  
PARK2 RPS27A  
HCK ACTB  
PLEC USP20  
RAN IPO11  
ASAP2 SRC  
CDK1 NSFL1C  
EXOSC9 EXOSC3  
HSP90AA1 EIF2AK1  
HNRNPH1 HNRNPD  
TP53 ZBTB2  
EXOSC9 EXOSC5  
EPB41 RAB10  
TRIM27UBE2K  
SOX9 TRAF2  
RPF1 SMURF2  
KCNV1 KCNB2  
ZNF408 ZNF330  
RPA2 GOLM1  
HSF1 HSF2  
SLC9A1RAC1  
EPT1 EWSR1  
MBP EFHA1  
TRAF2 C16ORF48  
PBX2 COPS6  
HSPA9 NFKB2  
KLF6 PNO1  
SYNCRIP PRKRA  
MAP3K3 HSPA1B

CENPA HIST1H3J  
ABLIM1 SFN  
RAN VRK1  
NAPG STX8  
ACTA1 CCIN  
USP12 UCHL5  
SREBF1NR0B1  
RPA2 COPS6  
CCT5 ACTA1  
CD40 SLC30A7  
SMC2 SMC4  
SUCLG1 CHMP1B  
PRPSAP1 TRAF6  
TSPAN17 PTPLAD1  
UBE4B VAV2  
HOXA1 KRTAP4-12  
LAMB3 LAMA3  
SERTAD2 TFDP1  
EPO EPOR  
RIC8A UBQLN1  
USP2 BEND5  
S100A3 DLG3  
SMAD9 ZSCAN4  
CCNT1 SKP2  
TBXA2R GNAQ  
LRIG3 NEIL1  
NCK1 EIF2B2  
GYS1 CSNK2A1  
SRC PDCD6IP  
SCLT1 IKBKG  
SMAD3 ZNF83  
GNAQ HTR6  
SRC DOK1  
GIGYF1ATN1  
GRB2 USP6NL  
TPT1 MCL1  
PTP4A3 ABCD3  
STAM2 DAZAP2  
LARP7 MEPCE  
GUCY2D GUCA2B

GRB2 TFG  
MYCBP2 YWHAG  
AIP MAX  
SKAP2 FASLG  
BCAR1 PTK2B  
KDELRL1 BRF2  
F12 MMP13  
EPHB2 GPRIN1  
RAD17 ATR  
HTR6 GNAS  
YWHAG MAPKAP1  
CAMKK2 ATG4B  
GH1 EIF3M  
PSMD6 UBE3C  
HDAC1 PIAS3  
HSP90AA1 MS4A2  
RAB3A CHML  
APC TUBA4A  
THBS1 SPARC  
DNAJB6 BRMS1  
CCDC85B ZNF764  
RPS24 TFCP2  
KPNA1 TAF9  
ZFYVE9 JUP  
EPHB6 SMAD2  
KLF4 HDAC1  
GNAI1 S1PR5  
MAT2A IKBKE  
WWC1 TNIK  
NAT9 KIAA1377  
HDAC3 NUDT21  
RARS2 PHLDA3  
HNRNPC HNRNPA1  
NCK2 PTK2  
DSG1 PKP2  
MAP7D1 C7ORF64  
TSHR GNA12  
CTNND1 CDH2  
MLLT3 EEF1A1  
PSTPIP1 ASAP1

PRKACA CACNG2  
PPFIA4 AGTPBP1  
MID1 UBE2D4  
TCEA1 IWS1  
CDKN1B YWHAH  
KIF3C KIF3A  
ETS1 EIF3A  
BIN1 CUX1  
RIPK2 UBE2I  
SUV39H1 TAL1  
PSMC2 PSMD7  
HSPB3 MRPL38  
PRKCG MARK4  
UBC YWHAG  
CLN3 AUP1  
PKN1 PLEKHA5  
HNRNPM SRRM2  
PLCG1 GTF2H1  
ADAM10 MAD2L1  
PLD2 STXBP1  
CCND3 PPP1CC  
CDK5 SET  
PFN2 IK  
TOP1 CASP6  
MAPK3 MAP2K1  
DBF4B KRTAP4-12  
HLA-B PSMD1  
SMAD1 SMURF1  
ATXN1 FAT4  
DRD2 CLIC6  
ACTA1 PRKCD  
SUMO1 INGX  
CUL2 ARID1B  
HSPB1 CYCS  
TFAP2B VPS11  
RPS27AITCH  
TCP1 PPP2CA  
EXOSC2 MEPCE  
MCM7 MCM6  
DNM1L MAGEA1

TOP3A TERF2  
CIAO1 DCTN1  
SPTAN1 TSSC4  
EPB41 EIF4G1  
SAP18 HEATR2  
CRYAB APP  
OS9 FOXRED2  
ITGB4 FLNA  
FGF1 S100A13  
TGFBR2 SMURF2  
SMAD7 EP300  
RHO SAG  
TLE1 LEF1  
HDAC3 PARP1  
NSMAF MAP1LC3C  
MYH9 MYOM2  
CD34 PRKCD  
CDK9 MEPCE  
PDGFRB STAT3  
MYCN CSNK2A2  
PARK2 DNAJB1  
RBM39 ESR2  
PLCD4 IPO11  
TNFAIP3 TRAF2  
FLOT1 BBS4  
DMRTB1 LENG8  
ATXN7L3B USP22  
GLRX3 CIAPIN1  
PSMD11 USP15  
PRKAR2A CAV1  
SMAD6 TGFBR1  
RBMX LNX1  
PIAS2 UBE2I  
CCL24 CCR3  
PPP1R12A RIPK3  
MOS HSPA1B  
MDFI ZNF670  
MRPL43 DDX56  
EIF3D EIF1B  
RUNX1T1 TAF9B

RPS27A PGAM5  
HDAC3 MBD1  
PRKACA PLN  
ACTN4 COIL  
SEC14L3 PSMB9  
DRD1 GPRIN1  
CDC25B KRT31  
ASCL1 EP300  
ZNF165 TCEB3B  
HDAC2 SRA1  
HSP90AB1 NFKB2  
HAND1 PPP2R5D  
MAGEB2 RPL35  
ELN MMP12  
NDEL1 MIS18A  
RAC1 ARHGDIG  
PTPN1 MAPK1  
ABL1 DNASE1L2  
UBA1 STUB1  
CALB1 IKBKG  
NCK1 COBRA1  
COIL WDYHV1  
YWHAE TPH2  
RAP2A RAPGEF4  
ITGB1 SLC3A2  
HDAC4 ACTA1  
SEPT7 CDC42EP5  
CCNA1 KIAA1967  
KHDRBS3 PSMF1  
ARSA CLEC4G  
MED1 NR1I3  
PTPN11 SIGLEC7  
MYOCD KDM3A  
ZC3H14 EXOC7  
RGS2 PPP1R9A  
ARIH2 WDR91  
HLA-B VCP  
TIMM50 AKTIP  
GRM5 EFN2  
PSIP1 PTK2

PSMD11 USP14  
NCK1 TRAIIP  
ATXN7L3 SERTAD1  
GPSM2 NUMA1  
INS IDE  
MLL2 SMAD1  
MEGF10 ARHGAP32  
YWHAQ SAMD4B  
SSTR5 SST  
KPNA1 HIST3H3  
DIAPH1WBP4  
CLTA RXRB  
POLD1 POLD3  
DVL3 NKD1  
RXRA RELA  
ROR2 FZD2  
GABARAPL2 ULK2  
SH3GL3 SNX24  
HDAC2 BRMS1  
CCDC85B CCDC120  
PIK3R1 DOCK3  
YWHAZ NEDD4L  
CDK9 DHX30  
EPHA1 SMURF2  
PRKCD AKT3  
VHL C6ORF125  
RPL38 TRAF6  
USP7 SRP68  
RASA1 TSC1  
P4HB P4HA3  
YWHAZ FAM13B  
BAG3 WNK1  
ASXL2 BAP1  
YWHAZ FAM53C  
PSMB6 POMP  
TXNDC9 FEZ1  
VCAN SELPLG  
TRAF3IP1 PPP1R13B  
ATXN1 FAM46B  
CLTB CSNK2A1

TIMP2 PAICS  
ACVR1 BMPR2  
MED7 BARHL1  
MYC BIN1  
LSM6 MCRS1  
HDAC1 MAD1L1  
PLCG2 SYK  
DYNLL1 DYNC1H1  
YWHAE ZC3H7A  
DDX5 TCEA1  
PLCG1 CD22  
LYN EPOR  
RPS6KB1 RAC1  
ABCA1 GOPC  
TNK2 PAK2  
MAST2 CDHR2  
SNTB2 DTNA  
SMURF2 UXT  
CBX4 USP7  
MYL6 DNAJB9  
PIK3R1 ABI1  
ZNF318 HDAC2  
NR3C2 RANBP2  
GPS2 DBNL  
SIP1 FBL  
IQGAP1ACTA1  
FGA NID1  
CHMP2A STAMBP  
VDAC1 MCC  
EIF3E ARF6  
SRC SHB  
H2AFJ DEK  
MYC DDX24  
ELAVL1 GIGYF2  
CRMP1 CCT7  
SMURF2 ASH2L  
C19ORF50 MOBKL1B  
HNRNPH1 IKBKE  
UTP14A NINL  
BMP6 BMPR2



TGFBR1 WDR13  
HDAC1 ZMYND11  
RASSF7DISC1  
VHL LMAN1  
TK2 TUBB2A  
TRIM25RARRES3  
LRP6 GSK3B  
PTTG1 BTRC  
C4ORF17 SH3GL3  
MLLT4 USP9X  
TAL1 LMO2  
TCF3 SKP2  
NCK1 ASXL1  
YY1 GTF2B  
HSPE1 DSTYK  
SIRT1 EZH2  
GDF9 ORAI2  
KRT6B KRT15  
PIM1 SHMT1  
NSMAFGABARAPL1  
ZBTB16WDR33  
HOXC8 SMAD1  
UBE2I RNF185  
CHRM4GPRASP1  
SGTA PFN2  
BRCA1 TOPBP1  
TRAF2 TUBA3C  
SPCS2 STMN3  
SOCS3 MAP3K7  
CDK5RAP2 LUC7L2  
TPM4 TRIP6  
NCL RAC3  
VAMP4 AP1M1  
SKIL UIMC1  
G3BP2 TRAF6  
IKBKB TUBB2B  
EXOSC10 SCRIB  
PLSCR1KIAA1683  
CSNK2A2 PPP1R8  
PRKCA FAS

SRC ETS2  
CUL5 COPS4  
FOS CAMSAP1L1  
KCNJ12DLG2  
TSC2 RAP1A  
RAC1 MYD88  
SNX3 VHL  
PIPOX ODF2L  
ATN1 RERE  
ADAM15 SNX9  
HNRNPH1 CRMP1  
LNK2 LNK1  
RALGDS RIT2  
SARS FTSJ1  
ZC3H12A AHSP  
COLEC11 PPIG  
CHD3 PTPRS  
BRCA1 BAP1  
CDH1 FOXM1  
VHL DNAJA3  
CBX3 ARL5A  
SUMO1 BTBD1  
REV1 POLL  
RPN2 TSC22D1  
NPHP1 TUBB  
CDK2 CDK15  
CEBPB HDAC1  
USHBP1 CEP63  
HDAC1 CABIN1  
CHD3 NAB2  
FURIN PRB4  
TGFA NKD2  
STAT1 NUCB2  
CCT6A PPP2CB  
NFKB1 SPTAN1  
DPPA2 SDCBP2  
FDFT1 SHPRH  
OTX2 FOXA2  
CTNND1 JUP  
PIM1 CDC25A

RNF7 IKBKG  
C19ORF50 UTP6  
GPD2 WNK1  
DCX PPP1R9B  
IGHM UBQLN4  
MYL2 LRSAM1  
CDC42EP1 FHL3  
TP53 CDKN2A  
HDAC1 DNMT3A  
CSNK2A2 HMGA2  
UBA5 SH3GLB2  
UBXN1 WDR20  
CIAO1 HDAC2  
VPS4B CHMP1A  
HLA-A UGGT2  
HLA-A UGGT1  
HLA-B RCC2  
CDK2 UHRF2  
RAMP2 CALCRL  
AGT KNG1  
CEACAM1 CLEC4M  
SYK CRKL  
PDPK1 RPS6KA3  
FKBP2 UBQLN4  
GNAI3 NUCB1  
HNRNPUL1 NXF1  
NLGN2 DLG3  
DTX3L UBE2D4  
RELA PRKCZ  
ELN FBN1  
SELL SELE  
LPXN PTPN12  
ELN FBN2  
FOXO3 FANCD2  
EIF1B RPS11  
TRAK2 KCNJ2  
ADCYAP1 SCTR  
CAV2 FLOT2  
FER ABI1  
DCX USP9X

ABL1 ATM  
JAK1 BRCA1  
STRN3 FAM40A  
TCF3 ID1  
EIF1B RPS29  
TRIM29MYO15B  
NFIC TPD52L3  
ITGA2 LAMA1  
ABL1 GRB10  
VCAM1MSN  
SRSF5 CD101  
KPNA3 MEPCE  
MYL2 CDC42BPA  
TRDMT1 INSL6  
SMAD9 MTMR11  
SLC6A4PICK1  
E2F1 E2F4  
PAX6 INADL  
MEN1 PIAS4  
HDAC2 MAD1L1  
SETDB1 ZFP64  
UBE2L3 NEDD4L  
CYFIP1 CYFIP2  
PDLIM1 ACTN2  
EIF1B RPS14  
CLTC AP3B2  
GRK1 SNCB  
APC CSNK2A1  
CDH6 CDH18  
VCAM1ITGB7  
PRKCA HMGA2  
BEGAIN ZFP64  
SRF CASP9  
DLEU1 SHMT1  
SRF CASP6  
SRF CASP7  
SUPT5H PCBD1  
TP53 TAF9  
SFN MPRIP  
YWHAE HDAC7

CXCR1 CXCL5  
CD46 CD151  
SMNDC1 PREX1  
ENG ACVR2A  
FANCA GRB2  
PIN1 SRRM2  
RBFox2 QKI  
TRAF2 ITPK1  
ARF6 PIP5K1A  
GLI3 STK36  
PPP2CAMRPS26  
ERCC3 RAD52  
RNF113A UBE2U  
TBCB GAN  
ANKRD13A SMAD5  
CSE1L IKBKG  
NCK1 DOCK3  
CD4 CTSD  
IKBKAP ELP3  
TCEA1 INTS1  
AR RAD9A  
TRAF2 RIPK1  
ACP5 TNFSF10  
YWHAZ ATL2  
MAP3K8 RELA  
RPA3 TRAF6  
DLG4 DYNLL2  
SLC9A1YWHAZ  
HOXC9 HOXC13  
SIN3A NCOR2  
PAEP SMAD3  
GH1 CSNK2B  
PSMB7 POMP  
SQSTM1 CEP78  
ESR1 TAP1  
EWSR1 KCNMB1  
MUT PCBD1  
DVL1 VANGL1  
PRKDC LRDD  
GADD45G RXRA

SKIL SIN3A  
GABARAPL2 EIF4G1  
SDCBP EPHB2  
RBM25 GRB2  
MCC FAM40A  
NR1H4 NCOR2  
NUAK1 PRKAR1A  
HDAC2 CABIN1  
NDC80 MAD2L1  
TRAF2 PIN1  
MAGEA11 PNKD  
TLE1 HDAC1  
PFN2 EEF1A1  
SART1 WBP4  
ATXN3 PICK1  
URB1 NCK1  
PROS1 TYRO3  
MTA2 GTF2E2  
AP2A1 NAGPA  
BCL2L11 BAD  
ZCCHC12 APPBP2  
PTGIR ADCY10  
KDM1ACDC5L  
RXRA PRMT2  
INSR PTPRJ  
RBBP6 WBSCR16  
PHACTR2 NCK1  
RIOK3 FBL  
SOD2 HDHD2  
HSPA4 SMAD3  
PCNA RELA  
KDEL1 NEK6  
PPP2R1B PPP2CB  
EIF2AK2 CDC42  
PRKAB2 MAP3K5  
WBP4 SFPQ  
CAD TRAF2  
CSNK1A1 PSEN2  
HSPA5 TANK  
CDH1 IQGAP1

EHMT2 CDYL  
YWHAZ CIC  
MED6 MED19  
APOH ANXA2  
PLSCR1NPDC1  
GRB2 PXDN  
MAP2K7 ERC2  
PSME3 YWHAZ  
HNF1A TBCA  
DMD FASLG  
LMO2 NHLH1  
PRMT1 PRMT8  
ETS1 RAD23B  
RPS6KB1 EIF4B  
RAD50 USP42  
HDAC3 DAXX  
CHEK1 POLA1  
MCC PSMD2  
SPTA1 ERCC4  
PDCD6IP VPS28  
LIFR PTPN11  
PRKCG PEBP1  
MAFG HOXD12  
IGF2 IDE  
TMEM11 BNIP3L  
CTNNB1 GPRIN1  
YWHAZ MYOF  
PLK1 BICD2  
BCAR1 DOCK1  
DRAP1 PIK3R3  
APP SET  
LONP1 ECSIT  
LMNA UBE2I  
YKT6 USO1  
TFAP2A GRB2  
ZAP70 TUBA4A  
FADS1 DHCR7  
USP12 USP39  
TPR MAPK1  
TFAP2A RPS27A

TPO TXNDC11  
CLSTN1 KLC1  
RAB27B MLPH  
PLSCR1FAM113A  
EIF1B RPS16  
PLG ANXA2  
TCEA1 REXO1  
ATP6V0C LASS2  
PXN PTPRO  
CBFA2T3 TCF3  
GSPT1 BECN1  
NCL MYH9  
SRC FRS2  
DYNC11I1 GSK3B  
DMD KCNJ4  
GH1 SHC1  
HNRNPL RPF1  
PRKDC WRN  
PLEC TSC22D1  
DNM2 PACSIN3  
IL6ST OSMR  
ERBB2 BCAR3  
ACTA1 MYO9B  
GAPDHS100A6  
PSMD11 USP20  
PPP1R12A ROCK2  
PHPT1 TRAF6  
ERBB2IP CTNND2  
CBL YWHAB  
CBL SFN  
KIAA0776 UBE2D3  
NPHP1 INVS  
SIN3A NR2E3  
MAPK9 DUSP16  
ERCC5 MAPK6  
YWHAE ANKHD1  
NR2F6 NAP1L1  
DVL1 CSNK1D  
RPL31 WBP5  
LOXL4 ECSIT



FLNB SMURF2  
KEAP1 SLK  
GRID2 GRIK5  
APP CLU  
TRAF1 TNFRSF11A  
SOS1 PACSIN1  
CP PROC  
RIPK2 CARD16  
EPOR MAPK1  
HNRNPK QKI  
VWF COL1A2  
OTUB1 NAT10  
WFS1 WNK1  
BIN1 ABL1  
NOXA1 NOXO1  
CAPZB MTPN  
TGFB1 CDC42EP4  
ESRRG PPARGC1A  
IFNAR1 PTPN6  
WNK1 BAZ2B  
TCEB1 MED8  
RPL38 PHLDA3  
MDFI THAP7  
MCL1 PIN1  
SNRPB GEMIN4  
CNOT7 IKBKG  
INSR MAPK3  
NPM1 HMGA1  
YWHAE MAP3K5  
HCFC1 THAP3  
SOCS1 FLT3  
ZNF439 MDFI  
PRKCB TAF1  
CBR3 USP3  
MAPK1 PEBP1  
ITGB1 IGF1R  
MITF RPS6KA1  
MMP2 MMP28  
JAK2 PTPN11  
BCAR1 E2F2

CAD MAPK1  
F2RL2 GRB2  
GTF2I SUV420H2  
PIAS2 SUMO1  
RPS6KA5 ATF1  
PICALM EHD2  
IKBKE TMEM111  
MAFG C7ORF64  
EXOSC6 DIS3  
TAF4 SUPT3H  
NR3C1 IFNGR2  
SMAD9 CYP11A1  
AR HDAC7  
HDAC3 DACH1  
MYO1ABAZ1B  
NR3C1 STAT5A  
FN1 ITGA4  
SOCS2 GHR  
TCF4 PIAS4  
MCC MSH2  
SMARCA4 NR4A2  
CA4 SLC4A3  
PSMD11 MED31  
SMAD3 PAPP  
CASP1 CARD16  
HCFC1 SETD7  
HRAS PIK3R1  
CLIP1 IQGAP1  
DEXI TBCD  
PITPNM1 CDK1  
PARP1 TRIM29  
ABL1 ROS1  
HDAC1 BCL6B  
LGALS3 CYHR1  
PNP EPB41  
EGFR PRKACA  
MED22 MED10  
ATF7 JDP2  
CCT5 RIPK3  
PHB2 UPF2

EIF3H ARPC5  
MAPK3 HDAC4  
SNRPB CDC42  
ZNF8 SMAD5  
PCP2 CHR1  
CSNK2B PIN1  
LIN7A APBA1  
GRK5 AVPR1B  
CEBPB SMAD4  
CACHD1 RANBP10  
PRPF40A FMN1  
RNF41 BIRC6  
ITCH HNRNPUL1  
TAF5 TAF12  
PPP1R16A PHPT1  
SRSF6 SF3A2  
MAPK1 NDE1  
ZFP36 EXOSC6  
YWHAE TAB2  
CENPJ PLK2  
POLR2E TRIM29  
MAPKAPK2 HSF1  
MYC UBTF  
TRIP12 CELSR3  
DAND5 SMAD2  
CASP3 HSPE1  
CENPK PCBD2  
HDAC1 MIER1  
GSC SMAD3  
KDR VEGFC  
EMD CHD4  
RAB3A PSEN1  
TEAD1 YAP1  
MAPK14 ROBO1  
MED22 MED8  
UBR5 MCRS1  
ZNF24 KAT5  
SIN3A MAD1L1  
NUDT21 EIF1B  
PSMD2 UBE3C

SPI1 MAPK8  
FGF4 FGFR2  
DNM2 GRB2  
SRMS IKBKE  
HDAC3 GTF2IRD1  
EGFR SPCS2  
HLA-B VAPA  
SSR1 SSR4  
FDXR FHIT  
XRCC6 EP300  
RANBP1 TNIK  
RTCD1 HNRNPUL1  
FANCC FANCE  
VAMP1 STX1B  
TGFB2 ARHGEF7  
CDK1 RACGAP1  
CP ATP7A  
RAB27B SYTL4  
SUMO2 CUX1  
GABARAP NSMAF  
RBX1 GPS1  
CCDC33 UBQLN4  
EWSR1 CPSF6  
NUP214G3BP1  
NFKB1 TUBA3C  
GPRASP1 TAC3  
PARP1 NCAPG  
SCLT1 SCN10A  
SNX3 USP10  
MYB MYBBP1A  
SRGAP2 YWHAG  
YWHAG SHPRH  
CDCA8 SGOL1  
PDXDC1 GSTK1  
TUBB4 NFKBIA  
PPP2R1B CTTNBP2NL  
YWHAE FAM13B  
GAPDH MAP3K3  
DNASE1 ACTG1  
WNK1 TSC22D1

HDAC1 NR0B2  
TIRAP DNAJC3  
TRIM63 TTN  
UBE2E2 RNF19A  
RTN3 MAP4K4  
MAP2K1 KSR2  
SYMPK WWOX  
NBN DDX1  
HSPA1B MSR1  
UBC HERC3  
RBPMS C16ORF48  
UNC13B WDR48  
NR2F2 EP300  
CKM TRIM54  
VHL OTUB1  
LRRC59 ATG5  
DOK2 NCK1  
ARNT ARNT2  
RPL37AINSL6  
CLNS1A ACTB  
TFAP2B SYT4  
IRF8 TRAF6  
ATN1 WDR5  
RPS6KB1 RPTOR  
RGS2 SCN5A  
RAC1 RASGRF1  
HRAS VAV1  
TLE1 CUL4B  
DIAPH1PRPF40A  
ERCC6 RNF11  
MAPK14 TSC1  
APPBP2RASSF5  
EPHA2 CDH5  
TNFRSF1B CLTC  
SNRPE SNRPF  
TP53 BCL2L1  
TEX11 POM121  
PARK2 PSMA4  
DST TRAF3IP1  
PARP1 POLA2

USP19 TMEM33  
SIN3A CABIN1  
EGFR CEBPB  
ERBB2IP SHOC2  
TSC2 GRB2  
PCM1 BBS4  
MDFI ZNF607  
CDC20 KRT32  
STC2 PEBP1  
RAP1GDS1 RHOA  
TOMM34 DMAP1  
GRB2 KIAA1217  
SNRPE SNRPD3  
RNASEH2A SMAD4  
PSTPIP1 MYH13  
SNRPE SNRPD2  
SNRPE LSM3  
SMAD6 HOXC8  
AP3B1 AP3S2  
PARP1 WRN  
TAF5 TAF9  
CSNK2A1 F11R  
TSC2 RPS27A  
PDPK1 PTPRC  
SLN PLN  
AR MED12L  
RBPMS TOLLIP  
MME PIK3R1  
LGALS9 JUP  
SMAD1 PREB  
PTK2 RBBP6  
MET PTPRO  
PARP1 IKBKE  
CREB1 RPS6KA3  
POLR3C POLR3H  
MCC PFKP  
IGHM CD79A  
F3 FANCB  
GABARAP ATG7  
AP1G2 AP1S2

GAPDH PDCD6IP  
SELE PLCG1  
DNAJC13 STUB1  
HGS TRAP1  
PPEF2 CALM2  
GRB14 TNKS2  
NGFR TRA2B  
CSNK2A1 UBE2R2  
LTBR TRAF2  
HDAC2 NCOR2  
NGFR GRB2  
CDKN1A CDC5L  
RCN3 SUFU  
HSPA5 EIF2AK3  
SMNDC1 EWSR1  
MAP3K1 RCN2  
GCH1 CNRIP1  
ERBB3 RIN1  
CRP FCGR2C  
CRP FCGR2B  
BCAR3 PFKP  
MAPKBP1 MAPK8  
MAPKBP1 MAPK9  
GNL3 LYAR  
PTPN11 SLC6A20  
EPB41 PSME3  
CDC42 PRPF40B  
ESRRA NCOA3  
SELL GRB2  
SKP1 RBL2  
MAP2K6 MAPK14  
COPS2 COPS7A  
MED6 THRA  
RPL8 FAM188A  
TRAF2 TAOK3  
TRIM27ZBTB16  
EZH2 DNMT3A  
ZNF598 FAM178B  
HIST1H2AE NAP1L4  
BRCA1 KAT2A

ACTA2 MYOC  
U2AF1 CIR1  
LEPR PTPRJ  
BZW1 CDC5L  
HSPA5 MTNR1A  
CDH1 CASP3  
KDM1AHIST3H3  
TUBA4A SKA1  
TP53 TRRAP  
CASP2 BID  
CNTNAP2 MACF1  
OSR1 EGLN1  
NUP155ZFYVE9  
CCT6A RFW2  
EIF3K EIF3L  
USP7 DCAF4  
SKAP2 LYN  
ETV6 SMURF1  
ANXA2 PHB  
JAK1 STAT6  
RELA RNF25  
JAK1 STAT5A  
JAK1 STAT1  
GOLGA2 MEF2D  
IL1A CAPN1  
FEZ1 SAP30L  
PSME3 USP43  
TEX11 LIN37  
TAF1 TAF9  
MAX ZBTB17  
GAPDHMAP3K14  
SOS1 EPS8  
MDC1 MCPH1  
SULT1E1 C7ORF64  
ABL1 SHD  
KCNA3 KCNA4  
CEBPG MLLT6  
POU2F2AR  
DNM2 MYO1E  
HSPB3 MED8



TAF6 TBPL1  
BDKRB2 GRK6  
IFRD1 TP53  
SYNJ1 MYO1E  
PDCD6IP VPS4A  
RPS6KA3 BAD  
PRSS23 TRAPPC4  
YWHAZ DDIT4  
PDE6D RAB18  
STK4 CNKSR1  
PGGT1B RRAS2  
EPHB2 PTK2  
CISD1 PRKAB1  
DAZAP2 BATF2  
RPL38 RUVBL2  
KCNB1 KCNG3  
SPIB MUM1  
UCHL1 VHL  
RTN4IP1 RTN4  
ICAM2 CD209  
CANX PLP1  
WAPALPDS5B  
USP7 PDCD6IP  
TMSB4Y ACTG1  
MRPS16 PHLDA3  
WT1 TP63  
TPM3 ACTA1  
REV1 MAD2L2  
PLXNA2 HACE1  
SYN1 SH3GL2  
XRCC6 TERF2  
RAE1 NXF1  
ADAM15 SH3GLB1  
FES PSMD13  
RHOA GRLF1  
PPP1R12A DMPK  
CASP8 NOD1  
BLMH RNF32  
PDGFRA PTPN11  
PIP4K2B UBQLN4

PLSCR1 CPSF6  
FOS HSPA1B  
REC8 SMC3  
EGFR TUBA1A  
IRAK1 IRAK3  
IKBKB NFKB2  
ABL1 RIN1  
PFAS EPB41  
ZBTB16 HDAC7  
SRSF2 POLDIP3  
MAP2K6 PKN1  
APC PPP1R13B  
ARRB1 PTH1R  
YWHAG ZNF638  
SLC9A1 UBE2I  
HIST1H3J SETDB1  
TBP DR1  
CPE INSL6  
CYP27B1 MED21  
CENPE NUF2  
APBB1 WAS  
FGFR1 NCAM1  
KIF1B CPEB1  
YWHAG NOLC1  
CLTC PICALM  
TFAP2A APC  
ZNF473 DAXX  
AP2A2 SMAD1  
C19ORF10 UBQLN4  
DSTN IKBKE  
DSPP ARID3A  
SPTBN1 PJA1  
RELA PYCR2  
SSR4 HECW1  
MYST2 POLB  
SAP30 HDAC2  
DAND5 POGZ  
SMAD9 TRIM29  
MAP3K7 ACTG1  
LMNA YWHAZ

SMC2 DISC1  
TNPO2 ELAVL1  
CDKN2A ZFP91  
APBB1 SFPQ  
TRIP13 RBPMS  
GATA1 ZNF521  
LGALS3 GEMIN4  
FASLG OSTF1  
SETDB1 SUFU  
RXRB PPARD  
FOS SF3A3  
GH1 EEF1D  
AR ZMIZ1  
HSPA5 DNAJC1  
CDC42 NDEL1  
PABPC1 PAN3  
CDK14 RB1  
GRIN2D DNM1  
CDC42 EEF1A1  
SIKE1 TBK1  
CDH2 PKP4  
PACSIN1 CABP1  
SIX6 TLE1  
ELOF1 CHMP6  
SOCS3 CSNK1E  
TLX3 DENND4A  
RAE1 WDR26  
TNFAIP3 WNK1  
CHEK2 XRCC1  
CASP1 NFE2L2  
MYO1BCIAO1  
C2ORF18 KIAA0232  
RAB4A RABEP1  
DAND5 MIER1  
CS HLA-B  
HIST1H3J CARM1  
EPHB2 AQP1  
SH3BP4NFU1  
MRE11A USP11  
CCDC47 GSTK1

PLCG1 LIFR  
MAPT STUB1  
ADRB2 RPF1  
LEPROT LEPR  
FASLG CASP10  
NR1H3 SIRT1  
UBE2D1 RNF4  
UBE2D2 AMFR  
CCDC85B RBM41  
NCK2 DNM1  
BLOC1S2 OSBPL9  
SLC2A1PDIA3  
NTS SORT1  
AXIN1 CTNNB1  
CYP27B1 TDG  
BRCA1 MSH6  
MOBKL3 MED31  
RPS27AMARK4  
IL2RA STAT3  
XPO1 ANP32B  
IL2RG JAK3  
INHBB ACVR2B  
HSCB BBS2  
TRIM29TSGA10  
PLG KLK3  
RAD17 ATM  
CDC45 ORC1  
CDC45 ORC2  
MCC EIF3I  
DLG1 KCNAB1  
CTNNB1 RUNX3  
ZBTB16HDAC2  
CYP27B1 SNW1  
GDF9 SMPD3  
ESR1 STAT3  
UBA52 LAPTM5  
UBE2D2 FBXO4  
UBE2D2 FBXL3  
UBE2D2 FBXW2  
BCL2L1BAG1

PIK3R1 AKT1  
AP2B1 FAM46C  
TP53 RYBP  
WNK1 ZNF777  
HRK BAD  
MCM4 HAUS1  
EIF1B UBE2V2  
GATA2 ZBTB32  
SLC16A1 TSC22D1  
G3BP2 STK24  
PPM1A LXN  
TNFRSF10A TNFRSF10D  
SCT SCTR  
LPXN PTK2  
PTPN1 BCAR1  
ARR3 AP3B2  
NOS1AP LRP1  
TLR2 RAC1  
NCK1 MAP4K3  
MAP2K1 PEBP4  
GRB2 SHC3  
ING5 KIAA1377  
PTPN6 SYK  
PTPN6 ZAP70  
KBTBD7 PI4KB  
DDX19A MIF4GD  
PLXNA2 IFT80  
CYBB NCF4  
CREB1 SMARCA4  
SRF RELA  
PIN4 ASCC2  
SDCBP CADM1  
PRKAR1A UBE2M  
FABP3 VPS28  
PTBP1 PCBP2  
PTBP1 PCBP1  
IFNGR1 IFNGR2  
SIRT1 MAP1LC3B  
MTOR RPTOR  
VAV2 MARCH7

MAPK3 TTYH3  
SEMG1 KLK2  
USP44 TBL2  
RAC1 SPTAN1  
LDOC1 CCDC85B  
GYG2 IKBKG  
TRAPPC3 C4ORF41  
HNRNPA1 FRMD4A  
EGFR PTPN2  
YWHAH ZBTB17  
GAS1 SHH  
PVRL2 MDFI  
SRC TRIP6  
OTUB1 TNIK  
CCT6A SUMO4  
SRC TRIP4  
CLTA CTNNB1  
MAP2K1 TRIB1  
SMAD9 CXXC5  
MAP2K1 TRIB3  
EGFR SHC1  
EGFR PTPN6  
PIP5K1C CDK5  
IRAK1 RPS27A  
HSP90AB1 RPS4X  
YES1 EPHB2  
SMNDC1 IFT88  
COPS2 DDB1  
AR HDAC4  
SH2D1B ERBB2  
FN1 MEP1B  
PLCG1 WAS  
GPI AMFR  
SRC TRIP10  
FN1 MEP1A  
MARK2HDAC7  
KAT5 UHRF1  
SRC EPHA4  
YWHAH MAP3K3  
ACTR1A BICD2

NXN CHMP6  
BLM TERF2  
XIAP UBE2W  
SRC TXK  
NKX2-1 TDG  
VCP VCPIP1  
SRC ABL2  
SRC SF1  
TAF1 TAF8  
SMAD3 SNW1  
IL2RA NFKB1  
SDPR NUDT18  
ARCN1 COPB1  
GOLIM4 GRB2  
HMGA1NFYA  
KLF4 CTBP1  
GDF9 ADPGK  
SUV39H1 ATAT1  
RAD23B NGLY1  
AURKAPPP1CA  
WASL GRB2  
ARAF CHD6  
CDK2 MNDA  
AIRE SRSF1  
PTN SSR1  
CUL3 NEDD8  
RBX1 DCUN1D1  
STK36 SUFU  
APPBP2SCFD1  
ARCN1 COPA  
CFTR PPP2R1A  
CFTR PPP2R1B  
DNASE1 ACTB  
CCNT1 CDK8  
MME ADM  
GRB2 WASF1  
PSTPIP1 ANAPC2  
YWHAB USP32  
A2M LRP1  
POLDIP3 USP20

XIAP TAB1  
NACAP1 CTNNBIP1  
PRRG2 RPF1  
ELAVL1 SREK1  
IL24 IL20RA  
SH3KBP1 SH3GL3  
SH3KBP1 SH3GL2  
ACTG1 REL  
PRPF4 USP4  
SH3KBP1 SH3GL1  
CDH1 PKD1  
SMAD3 CAMK2G  
HSP90AB1 RPS6  
EFEMP2 UBQLN1  
DDT IKBKE  
CRX KAT2A  
DAND5 SF3A1  
LPHN1 SHANK1  
MAF KDM5B  
HNRNPA1 HNRNPH1  
PFAS VHL  
SYK FCRL3  
SH3BP4CIZ1  
GRB2 HSPH1  
ATAT1 SMARCC1  
TCERG1 EVL  
SOCS1 VAV2  
SIN3B SMARCB1  
XRCC5 TCF4  
TNFSF11 MMP7  
TCEB2 SAP130  
TP53 STAT6  
TAF10 ENY2  
CHEK2 BRCA1  
SRC MATK  
DEDD ATP6V1E1  
GTF2F2 CRBN  
CAST PPFIA1  
ARHGDIA SET  
LRPAP1 MTOR



MCM3 ARF6  
ADRB1 GPRASP1  
HNRNPC SMARCA4  
TRIM28ZNF74  
TCEB1 SAT2  
KEAP1 MAP1LC3A  
WHSC1 BRAF  
MARK2MAP3K3  
RARA NSD1  
PRKACA MIP  
UBE2D2 MIB1  
PPM1B ANXA1  
PFN2 ROCK1  
ELAVL1 SRRM2  
HERPUD1 EWSR1  
EPHB3 MLLT4  
DNMBPWASF1  
CCT2 TBK1  
GTF2F2 GTF2E2  
LRRIQ1 HES4  
GTF2F2 GTF2E1  
KRT18 KRT72  
ARID2 PBRM1  
BRCA1 CREBBP  
NEDD8 MAGED1  
MCM2 DBF4  
NBN TERF1  
WEE1 YWHAG  
ZSCAN1 NPAS2  
EIF1B TSR1  
HSP90AA1 CDK4  
TFCP2 SMAD2  
PRNP CSNK2A1  
SHMT1 CSNK2B  
TUBB4 IKBKG  
TPSAB1 PIK3R1  
SMAD3 HDAC1  
HTATSF1 CCNT1  
MYB FBXL5  
CDC5L ZNF451

CASP4 SLC25A22  
TFE3 YWHAG  
STAT3 ELP2  
NCK1 BAZ2A  
NF1 SMAD2  
RPF1 SMAD1  
RPF1 SMAD2  
TGFBR1 RAB33B  
ATM IKBKG  
CASP7 RAC1  
HOXB6 SLC38A1  
SNTB2 MAST1  
ADSL DDA1  
TP73 MAPK8  
FASLG CASP8  
UBAC2 LMO7  
TRAF2 MYLK2  
MAGEA11 DNAJC10  
AR NLRP10  
PLS3 TNFRSF10D  
TGFBR1 NUAK2  
VAV1 SH3BP2  
ABL1 GTF3A  
ORC3 LCP2  
WDR1 GRB2  
KAT5 CDK5RAP2  
FAS CASP10  
KDM5CHDAC1  
SMAD3 PIN1  
DHX29 CENPT  
HDAC3 EP300  
PTPN1 CTTN  
LDLR CD36  
USP7 DAXX  
U2AF2 U2AF1  
UCP1 TOMM20  
RBFOX2 RBPMS  
ABL1 HCK  
GMFB TRAF6  
PDCD10 CTTNBP2NL

HSPE1 EEF1A1  
ARL1 ARFIP2  
NOTCH1 DLL4  
IRAK1 IKBKG  
PPP4C PPP4R1  
VIL1 ACTA1  
CD5 CD6  
MVK EWSR1  
SERPINA1 RPS27A  
MAPK8 TRAF6  
ZBTB43ZNF417  
RPN2 EZH2  
RPS6 MAP3K1  
CXCL13 CXCR3  
SMAD3 SQSTM1  
ADA GRB2  
FAS INPP5D  
NCK1 DRD4  
CLOCK RXRA  
BRCA1 HDAC2  
PRKCG NUMB  
NECAB2 USP7  
HNRNPA1 PABPN1  
KLK2 SEMG2  
DVL2 BAG3  
IFRD1 HDAC1  
RAN EP300  
SAP18 DDOST  
TUBB4 ROBO1  
SLC9A3R1 PTH1R  
COIL CCDC136  
SLC9A3R1 PAG1  
NDUFS8 MLH1  
UBE2E2 RLIM  
SRF HOPX  
CHEK1 CSNK2B  
ZFP36 NUP214  
CCT4 ACTB  
UBE2L6 FLNB  
EDN1 COPS6

HDAC1 TGIF1  
PPP1CCHCFC1  
RAB5A CHML  
VTN PRKACA  
ZNF217 RCOR1  
JUND ACTR3  
HLA-B NUTF2  
RAP1A RAPGEF5  
PLXDC2 NCSTN  
RPL11 SENP8  
YWHAB PIK3R4  
INPPL1 CBL  
TGOLN2 CRK  
MOBKL3 MED10  
MEPCE KIAA1967  
SREBF1UBE2I  
GOLGA3 IKBKG  
KRT18 KRT15  
HIST1H2BG PINX1  
ZNF217 CTBP2  
ARVCF ERBB2IP  
IKBKAP NFKBIA  
CBFA2T2 PRDM14  
HCLS1 BLZF1  
POU2F1 CREB1  
FAM175A BRE  
TAF5L USP22  
SKP1 CUL7  
CAPN1 CDK5R1  
TNFRSF1B SLC1A3  
PXN PTPRK  
GSTZ1 GSS  
TAF10 ANLN  
ZFYVE9 RNF11  
SGTA SEC61B  
PCMT1 PAK2  
CDK8 MED21  
SFN MAP3K2  
HNRNPD MEPCE  
SFN KLHDC2

CDH1 CTNND2  
IWS1 SETD2  
BTC ERBB4  
HIST1H2BL USP16  
NDUFS6 FGFR3  
APEH KIAA0174  
PAFAH1B2 PAFAH1B3  
SRPX KCTD13  
ZNF202 SCAND1  
PTPN3 YWHAB  
CHAF1B BAZ1B  
PTPN3 SFN  
RBX1 SKP2  
RGL2 CRMP1  
PDE9A TRIM32  
DNMT1 RGS6  
HNRNPH1 HNRNPM  
ZNF473 TRIM41  
ETV6 RPS27A  
MCC GOLGA4  
EEF1A1 ABTB2  
SNRPB GEMIN6  
ZSCAN1 SSX3  
ETV6 GRB2  
IGHG1 TRAF1  
HDAC1 NCOR2  
IKBKB RELA  
NSF PRKAB1  
RGS12 GNAI3  
STX8 WDR91  
PPIB CAMLG  
MAT2A MAT2B  
HDAC3 HR  
HGS SCRNI  
SUMO1 ZBTB16  
EFNB2 PICK1  
SYT13 NRXN1  
GTF3C4 GTF3C5  
ANKRD24 PACSIN1  
PIK3CB ALK

GTF3C4GTF3C3  
NFKB1 CKLF  
CREB1 SUMO1  
SNRPD2 LSM2  
CASP9 NAIP  
TRIM27DNMT1  
BAG2 HSPA4  
HSP90AA1 STAT3  
DVL1 PPM1A  
RAB8A INPP5F  
EIF4A3 RBM8A  
ERBB4 HDAC6  
FIBP FGF1  
TRIP6 SYNGAP1  
LY6H PPP1R16A  
UBE2D1 SIAH1  
PER2 CSNK1D  
CEBPE COBRA1  
CREB3 HCFC1  
PLXNA2 DHX37  
ACVR2B SNX6  
ASAP2 ARF6  
IGF1R IRS1  
RIC8A MAPK8IP3  
TNFRSF10A DAP3  
APC CCDC136  
KCNA2 RTN4  
RPF1 DHX30  
U2AF1 NXF1  
RAB5C DSTYK  
HDAC3 SRY  
GCGR BMPR2  
RXRG ZNF148  
PTPRC CD1D  
BRCA1 SMARCD2  
PRLR ZAP70  
CDH13 ADIPOQ  
CAPZA1 MAP3K3  
ABL1 ATR  
BRCA1 SMARCC1

DEDD APLP2  
GRB2 FKBP3  
PTPN12 PTK2  
GTF2F2 TAF5  
IFNA2 IFNAR2  
PCBP3 TNIK  
GLP1R ARRB1  
CHRM2 SET  
FAM40A PDCD10  
PRNP DNMI  
RALA FLNA  
CCR5 PTK2B  
HTR2C CALM2  
YWHAZ NDE1  
MAP4 GRB2  
KHDRBS1 SRRM1  
BCL6 ZBTB6  
EME1 MUS81  
MED7 SREBF1  
UBE2D3 RNF10  
CNTN2 STARD13  
TCF3 UBE2I  
IFNAR1 PTPN11  
HRAS FNTA  
NUP62 NUP54  
EHMT2 LGALS12  
CACNB2 CACNA1C  
TUBB FNBP1  
GADD45G EEF1A1  
BAG6 MAGED1  
MAD2L1 KEAP1  
NAPA SNAP25  
FN1 CD44  
SRF MAPKAPK2  
CFL1 NRK  
RARA HDAC2  
RBM10 SF3A2  
COPS4 BTRC  
BRCA1 CDS1  
FGA KRT18

BCAS2 SF3A2  
EIF3A UBA5  
GADD45A GADD45GIP1  
CS MCC  
SETD1A EMILIN3  
MCM7 SMC1A  
YWHAB YWHAE  
MOBK3 PDCD10  
SSSCA1NOC4L  
PTP4A3 POLD1  
RARA CREBBP  
CLIP1 TUBA4A  
PCBP3 PTBP2  
MAD2L1 IKBKE  
COPB1 ARF1P1  
CCT6A STK24  
KALRN APC  
ZBTB43LNX1  
AKT1 YAP1  
IFNAR1 TYK2  
EXOSC4 MPP6  
SFN KLC1  
SPTAN1 RIPK3  
SRSF11 SRSF1  
SMAD9 GRN  
ELAVL1 RPAP1  
CDC27 CDKN1A  
TCF3 ID2  
TUBB NFKB2  
WDR47 TCEA2  
PABPC1 PAN2  
MAP3K5 CIB1  
IL22RA1 IL22  
TOP3B FBLN5  
AZU1 TTK  
MCL1 PMAIP1  
SPTAN1 SHANK1  
AR PARK7  
SLC4A3PRKCE  
MYH7 NTHL1



CST7 CTSB  
HIST1H4I CXXC1  
ADORA1 P2RY1  
MAPK3 TOP2B  
USP39 SNRNP27  
HDAC1 NR2E3  
DRD3 MPDZ  
MYB FBXW2  
IL10RB UCN3  
PRKACA SIK3  
GEMIN5 GEMIN4  
EIF3B EIF3I  
DSPP PKP2  
F10 HIST1H1C  
FOXO3 PGK1  
SYNCRIP SYT12  
HNRNPH1 NCBP2  
GABARAPL2 ATG4A  
PRKCG RGS2  
EIF2S2 CRMP1  
SLC2A4IDH2  
FZD9 WNT2  
CEBPB STAT3  
CCND1 DMTF1  
STX7 NSF  
F10 PRKAB1  
TYK2 IL13RA1  
PRNP ALS2CR4  
YWHAB REPS2  
EGFR EPHA2  
MAPK8 MAP3K2  
AIRE POLR2B  
PSMD11 TRAF6  
JAK2 LEPR  
ATP1B1FXD7  
HNRNPR CNBP  
SFN BAX  
RPS6KA1 MAGI1  
ATXN2 RBFOX1  
GLUD1 TRAF6

XIAP UBE2V2  
CDH2 PTPN12  
PTPRS KIAA1377  
CTBP1 RBBP8  
HSP90AB1 ARHGAP1  
CFL1 ACTG1  
TACO1 FTSJ1  
UBE2U RNF181  
GATA1 SMARCB1  
HDAC3 CCND1  
EIF4G3 VAV2  
POLR1A RRN3  
UBE2D3 RNF181  
ACTA1 SPTAN1  
SMAD2 CUL5  
EIF4G1 UPF2  
KATNA1 LIPE  
CCT6A MAP3K3  
SPRY2 MAPK1  
H3F3B ASF1B  
UBE2L6 TRIM25  
NEDD8 NUB1  
TBP CBX5  
CIAO1 MCM3  
CRX SP3  
MEN1 SMAD1  
POLR2C MED10  
UBR5 CEBPD  
KAT2B NPAS2  
SMARCA2 CHD3  
APAF1 CASP4  
AKT1 PTEN  
SIN3A SAP30L  
G3BP1 C4ORF43  
SNRPD2 STRAP  
ZBTB16MAP3K3  
DIP2A INHBA  
PFAS TFE3  
SEC31ASEC13  
MED20 MED19

KBTBD6        MAP1LC3B  
ITGB1    NF2  
MAP3K8        TRAF2  
SMAD3    SMAD4  
ZNF205    CCDC85B  
OTUB1    DDX23  
USP8    CHMP5  
SMAD3    ANK3  
GPRIN1    DLG3  
MED22    MED30  
PRKCB    MAPK6  
HSPA1L        RELB  
SLPI    NFKBIB  
DAND5    TAF7  
HRK    C1QBP  
FN1    PFKFB1  
PIN1    G3BP2  
SPCS2    DDX56  
CAPN1    VIM  
MAGEA11        UBE2D4  
SNTB1    SCN5A  
MYC    HEATR6  
TPP2    HLA-B  
HSD17B4        NDRG1  
ETS1    TSC1  
HDAC2    NR2E1  
PSMD11        UCHL5  
CCK    ENPEP  
RB1CC1        MAP3K5  
CFL1    PPP2CA  
MYC    HNRNPU  
RIPK2    PCMT1  
BIN1    PTK2  
RHPN1    CNKSR1  
EFTUD2        PHLDA3  
GNAQ    TUB  
RPS6KB1        PPP2R2A  
SMC1A    STYXL1  
PRKACA        BTRC  
EMP2    EPM2AIP1

GAB1 ARHGAP32  
RNF4 UBE2W  
MFI2 PDIA3  
A2M PDGFB  
HIVEP1 APTX  
GSPT1 IKBKE  
ESRRA LYST  
EIF1B MAPRE1  
ZBED1 UBE2I  
HOMER1 ABI3  
HOXA10 CREBBP  
PRKACA PTBP1  
SNTB1 KCNJ12  
A2M NGF  
LYN EVL  
ARNTL DEC1  
PITPNM1 PLK1  
RPS27A KIAA1310  
TRIM28 TNFRSF10D  
NCK2 ATN1  
GSTP1 PNO1  
SAP18 C6ORF211  
SOCS3 IGF1R  
KALRN DISC1  
TP53 MTOR  
SFN WDR37  
UBOX5 UBE2E2  
APC2 ANAPC10  
MYC CEBPB  
MYBBP1A BAZ1B  
PRKCB OCLN  
CYP17A1 POR  
GRB2 MST1R  
GPN1 RUVBL1  
ARSE COQ6  
PLCG1 TEC  
SKIL TRIM69  
WNK1 CASP8AP2  
PRKCG CASR  
CCT5 PPP2R2C

PLCG1 ABL2  
SMAD3 TMED1  
YWHAZ PNKP  
KAT5 TRIM68  
FOS TRO  
GRB2 CD164  
H3F3B HIST2H2BE  
FN1 COL13A1  
MAP3K5 MAP3K3  
EIF1B TSN  
LMNA CASP6  
MCC RANBP1  
RPA3 PARP3  
PTN PIAS4  
C14ORF139 ATG4B  
PRKAR1A MCERS1  
PPARG PSMD1  
LDOC1 CEBPE  
RPS27APKD1  
HSPB6 YWHAG  
IER3 MCL1  
GDF9 PAFAH1B3  
PRKDC BECN1  
POU2F1TXNRD1  
CD99 PPIA  
MDFI ZNF426  
ELOF1 C5ORF22  
ZNF165 KRTAP4-12  
SMAD3 MECOM  
LRP10 HTRA1  
UBE2D1 DTX3  
MED6 MED28  
GDF9 LSM3  
HIVEP1 MAPK14  
RPS27AXIAP  
NCK1 RP1L1  
CSNK2B LYST  
VHL CCDC59  
RPS27AFOXO4  
IFIT1 EIF3E

KALRN EPHB2  
HIST1H3J      CBX8  
NCK1   TBK1  
MEN1   FOXN3  
NCL    RRP1  
PRKD2   PDLIM7  
ABL1    WASF1  
IRS4    HSP90AA1  
DDOST   STYXL1  
PCMT1   ATG5  
ARHGEF15    ESRRG  
YWHAZ      FAM82A2  
NAP1L1      TRAF6  
HDAC4   BCOR  
PSMD7   PSMD2  
EIF1B    SOAT2  
SKP1    MYC  
ABL1    NCSTN  
THOP1   CALM2  
HIVEP1   RAB1A  
SLC9A3R1    SLC22A4  
TNNI3   TRIM21  
TNFRSF1B    HNRNPU  
E2F3    RNF144A  
SMYD2   SMC4  
EIF4G1   MKNK2  
UBE2W   RNF26  
NBN    BLM  
RPS27ALRIG1  
GHR    PTPN12  
GRIN2D      RPS6KA3  
EIF1B    OTUB1  
RPS6    PAK2  
TAF1    TAF12  
SMARCA4    REST  
LCK    PLCG1  
EEF2K   MAPKAPK5  
SELPLG      SNX20  
RARA    RXRG  
MAGEA11    POLR1D

EHBP1 PACSIN1  
APIG1 AP1S1  
RUNX3 SMAD5  
PAK2 YME1L1  
NCOR1 DZIP3  
ADAM33 UBQLN4  
MCF2L SMAD2  
DDB2 DDA1  
LCK SH2D2A  
NR1H2 SIRT1  
LRRC47 USP32  
CSN2 TOLLIP  
RAC1 SH3RF1  
PRKACA PKIG  
DCTN2 DISC1  
RANBP1 IKBKE  
WNK1 HDAC9  
AIRE ABL1  
SVIP VCIPI1  
SOCS2 SOCS1  
GRB2 TFAP2B  
TCF21 HOXB6  
IKBKE LARS  
PRKCG GSK3A  
SMARCA2 SMARCB1  
HNRNPL TMBIM4  
MRPL2 TRIM63  
ITGA6 PRKCD  
PCNA TIMELESS  
CAPN2 BID  
GNB4 GNG12  
TNNI3 TRIM63  
CTBP2 ZFPM2  
ILK PARVG  
ILK PARVB  
PRPF40A MMP11  
ATF2 CEBPG  
CDKN2A PLEKHA8  
AP2B1 CLINT1  
HNRNPM NFKB2

RAC1 C3ORF10  
APP MAPT  
TOMM20 TOMM22  
MAD2L1 ESR2  
SBK1 PACSIN2  
MTA1 HDAC1  
HAP1 ATP5J2  
LPA MMP12  
RBX1 PGAM5  
FBLN2 COL4A6  
RCAN1 MAP3K3  
PTP4A3 SSR4  
INSR CALM2  
MEF2A MAPK7  
PLD2 CAV1  
CCR6 CCL20  
NCK1 SLC23A1  
CNBP NCBP1  
RPS6KA3 CREBBP  
ERBB2 STAT1  
CDK4 SMAD3  
PFDN6 MAP3K3  
RXRA NR1H2  
PCBD1 MAP7  
PAXIP1 ZBTB8B  
SLC9A1YWHAB  
MTA1 ATR  
DNM2 PACSIN2  
CREB3 CCR5  
HBM WNT1  
AGAP2 HOMER2  
HIF1A CITED2  
UBE2E2 TRIM39  
LMO2 RLIM  
PSEN2 CTNND2  
MAPK8 IL27RA  
PTBP1 HNRNPK  
BRCA1 RAD50  
STX6 VAMP3  
RPN2 ARF6



SREBF1SUMO1  
FXVD6 HAUS2  
CASP6 NUCB1  
MAP2K2 MEPCE  
ZNR1 UBE2E2  
ATP5C1ELOF1  
NCOR1 RUNX1  
MAGEA11 NDUFAF1  
DMD MAP3K5  
PAK3 SNCA  
CIAO1 GAS8  
PRKDC DHX9  
AGL PRKAB1  
NR1H3 ING3  
CDKN2A MCM6  
GF11B RCHY1  
MTHFD1 CDK2  
AR GSK3B  
TXN COPS5  
AR GSK3A  
HIST1H4I DAXX  
AKT1 MARK2  
GABARAPL2 IRGQ  
TCEB1 ASB9  
EIF1B TKT  
SUZ12 EZH2  
ACTN4 ITGB1  
CASP6 CASP8  
TCEA1 SUPT6H  
HCFC1 ASCL2  
BUB1 CASC5  
PRPF40A PDCD7  
USP11 IVNS1ABP  
RAD51L1 H1F0  
SMAD9 EXPH5  
AKTIP HOOK1  
GAS1 DLK1  
SFN ARHGEF16  
CYBA MDFI  
EED VAV1

AKAP9 DISC1  
TNFRSF21 TRADD  
IKBKAP MAN2A2  
GTF2B CREBBP  
SRC CD46  
IFI35 CLEC4G  
ESRRA TRRAP  
GNB2L1 RASA3  
ABL1 SPTAN1  
NBR1 MAP1LC3C  
FHIT UBE2I  
DPM1 PHLDA3  
SMUG1 RBPMS  
PTH2R CALM2  
SIN3A KLF13  
TNFRSF10B ARHGDI  
KRT6A TCHP  
PDHB PDHA2  
JAK2 G3BP1  
LPL EMD  
DNAJA1 THIL  
SKIL THAP5  
CCDC85B UTP6  
ITCH NDFIP2  
DLG1 KCNJ12  
PRKCG GRM5  
RUNX1 HDAC2  
NMI KAT5  
ETV6 L3MBTL1  
CAV2 GOLGB1  
DKK3 UBQLN4  
UBE2U BARD1  
PCNA FEN1  
UBE2D2 RNF38  
TBC1D4 CDK5RAP2  
ARIH2 UTP14A  
FN1 GRB2  
ESR1 DDX5  
ACVR1B SMURF1  
MAPK14 COPS5

EIF4E2 TRAF6  
SRF PYCARD  
BAG4 TNFRSF25  
APOE ALB  
SPTAN1 PIN4  
BRD4 SIPA1  
PARP1 POLA1  
EHMT2 KLF12  
AKR7A2 AKR7A3  
LGALS8 CALCOCO2  
PXN PTK2  
CALR TRAF6  
CPN1 CLEC4G  
POLR2F MED29  
DLG1 SCN5A  
SRRM2 RBM7  
DNM2 FCHSD1  
YES1 CD36  
HDAC3 SRC  
PRKACB RCAN1  
PML RPS27A  
DNMBPBIN3  
TOR1A CNIH4  
ARL2 PPP2R2C  
CIAO1 TUBG2  
FGR ARRB1  
HMGB2PRKDC  
RUNX1 CREBBP  
PEX19 PEX13  
RUNX1 MYST3  
NPBWR1 NPB  
GH1 PRLR  
ITGA4 ICAM4  
GDI2 PAK2  
CEBPE ALX4  
YWHAQ ELAVL1  
TMBIM4 TMC01  
TUBGCP4 PHLDA3  
NANOS3 NMT1  
PLA2G5 PLA2G4A

SNAPIN RGS7  
HNRNPH3 CCL13  
EPB41 CLNS1A  
PRTN3 SERPINB1  
MPHOSPH8 SH3BP4  
NANOS3 BDKRB2  
RAB6A RABGGTB  
PRR4 MUC7  
RAB3A RABGGTB  
DYNC111 ZW10  
NPHP1 TNS1  
CSNK2B MAPK14  
YWHAH WDR20  
LSM1 EXOSC8  
GNAI2 GNB1  
CD3E EPS8  
KCNB1 KCNV1  
DLG1 SEMA4C  
TUBB4 ARHGEF7  
EIF3E GPBP1L1  
FLCN FNIP1  
PSMD4 RASSF8  
HAUS6 HAUS1  
HDAC3 DAXX  
POLR2B MED19  
POLR3D POLR3B  
HNRNPL EIF2B1  
SNRPB CLNS1A  
SNRPE DDX20  
AKAP9 SMYD2  
GZMB UBE4A  
DLG1 TANC1  
TRAF2 IL15RA  
SNRPE WDR77  
TUBB4 IKBKE  
DLAT PDHB  
SKP1 CENPE  
GTF2E1 TRIM29  
WBP4 PSPC1  
BAG6 SERP1

PPBP STRN4  
GCG GLP1R  
HDAC3 SMYD1  
RPS27ANFKB2  
S100B MAPT  
EIF31 TRAF6  
TRAF2 RIBC2  
CALM2 USP20  
GHR CISH  
ZBTB16KIAA1549  
BCR PLCG1  
AXIN1 SMAD3  
FCER1G CLEC4C  
KDM1AIMMT  
SDCBP SDCBP2  
AQR USP28  
SNX3 IKBKE  
CRK SHANK2  
MTHFD1 CCNA1  
TJP1 CNKSR2  
DDX5 HDAC1  
TCEA2 KLC4  
IRF9 NR2E3  
UBE2V2 IGSF21  
PSMC3 PSMD6  
WAS BTK  
ITGB1 ITGA5  
SH3GL3 NDUFB9  
EEF1A1XRN2  
SOCS7 SEPT6  
YWHAB MAP3K3  
SAP18 ATXN10  
TGFB1 LTBP3  
AP2B1 OSBPL10  
ARL2 ARL2BP  
XPO7 GSTK1  
NCK1 ASAP1  
FUS MAP3K2  
MAPK8 SMAD2  
TRAF2 MAP3K1

PRPF40A FASLG  
PLG SERPINI1  
SKIL PLCD3  
USP7 ZMYND8  
RAD51L3 RAD51  
DDX5 PIN1  
TOP1 SUMO1  
FKBP4 SAE1  
DVL2 TCEB3B  
GNAI3 GPSM2  
TBP SPIB  
MYH10 YWHAG  
MUC1 GRB2  
PML RPL11  
NCR1 CD247  
RBBP7 TRAF6  
PER2 PER3  
CCNK CDK2  
TP53 CDK1  
NPM1 SENP3  
SNRPB2 SMYD2  
SKP1 ZC3HC1  
RPL8 C11ORF49  
FBXW4 C20ORF94  
RAC1 INPP5F  
TRAF3 MAP3K5  
PPARD HDAC7  
GCG GCGR  
MAP2K4 MAP3K4  
TP53 CTBP1  
MLL2 RBBP5  
MAPK1 CDC25C  
STX4 TXLNB  
HNRNPA2B1 GRB2  
PPP2R1A FAM40A  
CYB5B HLA-B  
MUC4 TOLLIP  
HDAC3 SUV39H1  
CSNK1A1 ERF  
IRF8 SMURF2

AR STUB1  
PARK2 TUBB  
NCK1 BRPF3  
CHRM2 GNG2  
PRKCB GNB2L1  
SHMT2 UBA5  
UBE2D2 STUB1  
HDAC1 SMAD1  
EPS15 CRK  
SRSF2 UBQLN4  
HDAC1 SMAD2  
CTNND1 COL17A1  
VHL LRRC59  
DCLK1 MYC  
DST CBF3  
ELF3 EWSR1  
PSMB6 UCHL5  
POLA2 RBM23  
PTK2B DPEP2  
XPO1 APC  
TCF3 SMARCA4  
RNF4 PATZ1  
GRAP GAB2  
SRGAP2 ROBO1  
GTF2F1 MEPCE  
POLR2C RPAP1  
HGS DLG4  
EP300 TCF12  
HDAC3 CBFA2T2  
RAP1A ARHGEF1  
ADD1 CALM2  
TNFRSF1B SLC25A3  
MEF2C C9ORF123  
GOLGA2 ZNF594  
BCR VPS28  
LIN7A MPP6  
GKAP1 UBQLN1  
CACNB4 MED31  
FLNA MTNR1B  
IL1B IL1RAP

SHC1 IL6ST  
ABL1 SCARF2  
S100A8 S100A9  
IQGAP1AIMP1  
TBX2 LZTR1  
SMARCA4 IKZF1  
PDCD6 TSG101  
PNP INSL6  
MAP2K7 CFLAR  
KCNMB1 EWSR1  
PTPRN UBQLN4  
PPP2R1A AKT1  
SLC35A2 MDFI  
TECPR2 MAP1LC3B  
UBC RAD23B  
VIP MEOX2  
VAV2 SH3BP2  
SRF MKL2  
SGK1 CD40  
FUS MAX  
PPP2R1A SMAD3  
MTUS2 ZNF655  
DLL1 ADAM10  
STXBP3 SIP1  
MAP1B MINK1  
HIF1A NDN  
ACTN1 PSEN1  
TSG101 GGA3  
CEBPD RELA  
STX6 PTPN9  
KDR P2RY2  
GSK3B XPO6  
PCNA RFC2  
CUL4A SNRNP40  
LMO2 EHMT2  
PCNA RFC1  
ABL1 DDB2  
C3 CFHR3  
CNOT3 CNOT6L  
CYB5A CYB5R3



MCM7 FHL2  
NXPH2 NRXN1  
UBR5 PGR  
AHCY PINX1  
PDCD6 CPNE1  
APLP2 APBB2  
SMAD2 PARD3  
JARID2 EHMT1  
HDAC1 BRMS1  
SMAD2 PARD3B  
PRPF6 TXNL4B  
MCC TBCA  
ACTN2 PALLD  
ATF2 CSNK2A1  
GSTM3 MPG  
ESR1 TRIM59  
SH3KBP1 PDCD6IP  
SPRR2A DLG4  
PDK1 RPTOR  
SRC ACAP1  
GBAS NPEPPS  
TIMM50 NFKB2  
GNA11 HTR2B  
GLRX3 PRKCQ  
RPS27ATTYH2  
JAK2 OSMR  
FZD7 DLG4  
GMPS IKBKE  
IRAK1 TRAF6  
HSP90AA1 MARS  
ZNF423 EBF3  
NUP62 NFX1  
SRC SNX17  
SKIL ASCC3  
AIFM1 MAP3K3  
SMAD9 DST  
PCNA RFC4  
JAK2 IL12RB2  
TLE1 RUNX2  
CTSG IGFBP3

SOS1 SNX18  
ARNTL SIRT1  
CDK1 RCC1  
GYS1 PRKAB1  
HLA-B SRC  
SIN3A TAF9  
C4ORF14 NFU1  
GOLGA2 HTRA1  
VAV2 SRPK2  
RUNX3 PHB2  
CIAO1 HELLS  
ERBB3 CSK  
TUBA3C PFDN5  
SGK1 MLLT3  
FBN1 MYOC  
SRC FHIT  
MGEA5 SPAG5  
SHC1 MPL  
SNAP23CFTR  
RRAS RASSF5  
SPERT TUBGCP4  
BMPR1B SRGAP1  
BUB1B HDAC2  
ARPC4 ARPC5L  
VAV2 CCT2  
SLC2A4SERPINH1  
UCHL3 COPS5  
BEGAIN ZFP64  
ACVR1B SMAD2  
PIP4K2B RNPS1  
GFER COPS5  
PPP2R1A FTSJ1  
UCHL3 CLPB  
RRP12 MAP3K14  
SH3KBP1 BLNK  
BNIP3L BAD  
FLT3 FIZ1  
MAGEA11 ZNF655  
ZNF33A WNK1  
PHYHIP C14ORF1

SUV39H1 CNTN2  
SHMT2 PRKAB1  
ZFY ZBTB9  
JAK2 STAM  
EXOSC2 EXOSC7  
PFDN6 PFDN5  
GFRA1 NRTN  
WNT4 SFRP2  
PAFAH1B2 ASF1A  
SMARCB1 ING1  
PDK1 PDK2  
RRAS2 RASSF5  
RECQL4 RAD51  
MAGEA11 C10RF65  
KIF5B SNAP25  
HMOX2GPRASP1  
GABARAPL2 DYX1C1  
SKP1 FBXO15  
HLA-DQA1 INSL6  
UBE2U CGRRF1  
CD28 PIK3R1  
ZNF207 WBP4  
TOP2B HDAC2  
NRAS MLLT4  
ERBB2 PTK2  
CDH2 ARHGAP32  
AHCYL1 WDR48  
SIAH2 PIAS1  
ESR2 SMARCE1  
XRCC6 C9ORF46  
MTIF2 ALK  
YWHAQ NCOA1  
RPS6KA1 CREBBP  
ERCC8 XAB2  
VDAC1 BAK1  
CDK2 ID2  
APBA2 NRXN1  
NEK9 NEK7  
FLNA ERBB3  
SIAH2 PIAS2

EGFR ERBB4  
GAPDHRPA2  
SLC25A5 TRAF2  
RING1 BCOR  
SOS1 RANBP9  
TPM2 MCC  
SYT7 STX1A  
NFKB1 HSPA1L  
NFKB1 HSPA4  
PRKAR1A PDE3A  
RPS6KB1 PPP1R9A  
XRN1 SMARCD2  
CCDC85B C8ORF48  
POLR3D POLR3E  
CCT3 PPP4C  
RARA NRBF2  
DNAJA1 SRRM2  
FBP1 ASCC2  
HIF1A HDAC6  
BMPR1A BMPR2  
RELB HDAC6  
SQSTM1 GABARAPL1  
RB1 NCL  
TRIM37EWSR1  
CCNK RBPMS  
PLSCR1EWSR1  
TFE3 SMARCE1  
TPR NUP98  
MECP2 SMARCE1  
UBC RIPK3  
AMFR UBE2D4  
SRSF9 HABP4  
CYFIP1 WASF1  
CASP3 EIF4G2  
NADK YWHAZ  
HSPB1 MAPKAPK2  
NRAS PIK3CG  
HHEX KRTAP4-12  
MAPK9 COPS5  
PDGFRA PIK3R1

MAPK3 ID2  
AIP PPARA  
MTNR1B VPS35  
CDCA8 RCC2  
PRMT1 HNRNPUL1  
EIF1B RPS28  
PTP4A3 TBC1D15  
CCL22 DPP4  
FYN ITK  
PRPF8 SRRM1  
PSMD2 PSMD6  
MYO1BTSC22D1  
CBL YWHAZ  
TIPIN TIMELESS  
ACTG1 RELA  
SHBG ACTA2  
ARPC2 ACTR3B  
XRN1 UPF1  
SKIL PIAS4  
SUPT3H TAF10  
CIITA HDAC1  
VDAC1 FSCN1  
CHEK1 CDKN1A  
EPOR CISH  
MMP14 GOLGB1  
EP300 SNIP1  
VTA1 MBIP  
PGAP3 GPRASP1  
GABARAPL2 DNAH7  
SCAMP1 EGFR  
HAP1 PCM1  
AHCYL1 JOSD2  
SAP30 CHD4  
MAP3K8 HSPA1B  
IPO5 FBXO33  
KRT1 MDM2  
EXOSC10 EXOSC4  
SMAD2 USP9X  
FHL2 FHL5  
NCK1 PNMA2

AHR CUL4B  
EIF4E2 ARIH1  
ZNF142 MAPK14  
EPHX1 FBXW7  
MYST1 MSL2  
PARP1 H2AFX  
PHYHIP NDRG1  
SRRM2 RBM8A  
MBP MAPKAPK5  
HDAC2 TCF19  
SORBS3 RBMX  
ISL2 LHX3  
PTPRZ1 TNR  
RPS27ARNF11  
EIF3J EIF3A  
TICAM1 IRF7  
CD19 PIK3R3  
PPP2R4 CCNG2  
PAK1 SH3KBP1  
MAPT CAMK2A  
SPRR1A ACTA1  
SUMO1 PLK3  
DDX42 RUVBL1  
RNF7 UBE2D4  
SDC1 SDC2  
HDAC2 RUVBL2  
HDAC2 CDYL  
MEOX2 SAMM50  
PDCD6IP TTF2  
HRAS NF1  
RECQL5 TIMP1  
SMYD2 IGF2BP1  
CCDC85B CWC25  
XPOT MAP3K3  
KCNJ4 PRKCD  
UBE2I IKZF3  
MLLT1 CBX8  
GDF9 TRIB3  
GRINL1A MYO9A  
SMAD6 CTBP1

UBC TRAF6  
NCK1 P2RX7  
TNNI1 TNNC1  
MAPK8 DUSP16  
FBXL18MDFI  
BCL2 NAF1  
HNRNPA1 ARHGAP23  
TGFB1 DPT  
RPS27ASLC10A2  
RBL1 CDKN1C  
C16ORF48 PDLIM7  
KCNA4 DLG1  
NUPL2 PRKCD  
PSMC2 USP14  
NPHS1 SRC  
RAP2A ARHGAP29  
APC DLG3  
RAP2A RASSF5  
APC CREBBP  
HNRNPC UBE2I  
RAB5A RABEP1  
SRC LRIG3  
CSNK2B OCLN  
WDR48 IWS1  
VAPB STX1A  
UBE2D2 RNF26  
ZNF423 WNK1  
GTF3C1EZH2  
CNP TUBA1A  
DDX42 RUVBL2  
NBN RAD50  
OPTN TBK1  
PRKCA TNP2  
FSTL1 ACVR2B  
SUN2 FBXW11  
MET BAG1  
SNRNP200 EPB41  
DDIT3 LDOC1L  
TEK PTPRO  
IFIT3 IFIT2

NPPA MME  
HCK RASA3  
HNRNPA1 CDK9  
INSR ARHGAP26  
ST13 TNFRSF14  
THRB CCND1  
PRPF40A XRCC6  
RB1 PPARG  
TRAF2 FADD  
SMARCD2 TP63  
ANP32A ATXN1  
SART3 MLF1IP  
LYN PILRB  
CYP27B1 HDAC2  
PAXIP1 RAD50  
CAT PTPN11  
CCR2 CCL7  
VEGFA PGF  
HMGA2PRMT6  
NFKB1 CARM1  
NR3C1 HMGB2  
COPB1 PRKCE  
SCAP SREBF2  
RPS27ADLG1  
MYBL2 CCND1  
ARNTL CSNK1E  
TUBB2A DISC1  
AIRE KPNB1  
CHD3 LUC7L2  
TG HSPA5  
VEGFA VEGFB  
ELF3 TAF9  
TAF4 TAF7  
TAF4 TAF11  
TP53 PIAS4  
TAF4 TAF13  
HTR2C DLG4  
SLC6A3EPN1  
TAF4 TAF5  
LCK SH2B3



TRAF2 CALCOCO2  
CYB5A CYP1A1  
TEX11 CCDC11  
MRPS6 INSL6  
AMFR UBE2D2  
TP73 CCNG1  
SBK1 PACSIN3  
CHD3 GIT1  
SPTBN1 ATF7IP  
TSC22D3 PLEKHF2  
SYT1 CFBF  
MPG SET  
ATN1 LTBP4  
RPS27A TRAF2  
ZFYVE9 SCYL2  
UBE2U RNF139  
CCR2 CCL8  
MYH9 CXCR4  
DNALI1 EPS8  
USP13 CACYBP  
RFX3 TRAF2  
AR DENND5A  
RGS9 GNAT1  
PLCB3 TRPM7  
NLGN2 NRXN2  
CYP27B1 CREBBP  
COL2A1 MMP13  
BUB1B SNCG  
NANOS3 AGTR1  
CIRBP LYAR  
MAMSTR MYOCD  
UTP3 ZHX1  
MCC CUL2  
ACTB CCT2  
MCC CUL1  
ITGB1 TIMP2  
PLXNB1 MLL  
RNF4 UBE2T  
PHYHIP S100A13  
VASP ERMAD

OPTN EBNA1BP2  
EFTUD2 PRKAB1  
SARS TNIK  
DSPP RELB  
GANABTNFRSF10D  
RPS27A POLI  
ETS2 TWIST2  
ABCC9 KCNJ8  
USP39 NOC3L  
HIST1H3J SIRT7  
TBC1D4 YWHAG  
RHOA ARHGEF4  
RHOA ARHGEF3  
CDC25C PIN1  
YWHAB EMD  
EIF3B UPF1  
CASP9 XIAP  
UBE2T AMFR  
BCL3 BARD1  
PSMC2 PSMD5  
RAC1 IQGAP2  
CDC42 RHOJ  
SERPINA3 KLK2  
CDC42 DEF6  
EGFR GOLT1A  
SLC9A1MDFI  
ARRB1 CCR5  
UBE2I ZNF646  
DNAJA1 SRRM1  
PTPN11 MAP3K4  
PLSCR1 ATG12  
LIMA1 IKBKG  
FASLG BTK  
HAX1 PKD2  
JAK2 GRB10  
FLNA CDC42  
MCC FHL1  
MAGEA11 TCEANC  
HIST1H3J SPHK2  
COG7 COG5

EPRS RELB  
CSNK2A1 PIN4  
LSM3 SNRPD3  
FGFR1OP PPP2R1B  
TCEB1 SERTAD1  
MMP3 CCL13  
UHRF1 DNMT3A  
SNAPC5 NMI  
TAF1 GFI1B  
APC2 ANAPC4  
RECQL5 RAD51  
APC2 ANAPC5  
APC2 CDC23  
SNRPD1 SF3A2  
SNW1 TRIM15  
RELT STK39  
RAB26 RPH3A  
TXNL1 UCHL5  
ALB PON1  
ITGA4 ITGB7  
MRE11A MDC1  
BCL2 BCLAF1  
HSP90AB1 IKBKE  
PLG APOH  
PFN1 MLLT4  
PTPRM PTPRK  
MTA1 ITGB3BP  
ARRB1 IRAK1  
TRIM5 UBE2D4  
SNRPA C19ORF43  
KRT7 PCNA  
CHEK1 CDC25A  
CHEK1 CDC25B  
PHC1 SCMH1  
CASP3 PSME3  
RPS27A STUB1  
CCDC47 PHLDA3  
RAN NUP50  
MAGEA11 RPS27A  
CCND3 EFEMP2

YWHAB MAP3K5  
ESR1 BRCA1  
CASP4 MSH6  
ACTB ABRA  
PLG FN1  
HLA-DRA CD74  
PRKACA PKIA  
KLHL18 COPS5  
NCK1 TNIK  
PLSCR1CRY1  
CCDC85B CHCHD3  
CDK5RAP3 DHX36  
MAPK8 BCAR1  
UBC USP15  
AKT1 THEM4  
CFTR HDAC6  
EPN2 LAPTM5  
GAS7 SFPQ  
CIAO1 COPB2  
ACTB FHL3  
PEBP1 PAK2  
CHEK1 CDC25C  
ABCF3 ACIN1  
N4BP2 CREBBP  
RAN NXT1  
AIFM1 TNFRSF14  
PTK2 UTP3  
PDPK1 PA2G4  
CASK CADM1  
OPRK1 RPS27A  
BCAR1 CDC42  
CALM2 MINK1  
HADHBDDA1  
YWHAB LYST  
TERT XPO1  
MAPK1 HLA-B  
PRPF40A ENAH  
UBE2D2 DTX1  
RFX5 HDAC2  
RPL5 TNIP1

FAT1 ENAH  
MEN1 CXXC1  
MYC TFAP2A  
CALM2 TTN  
HSP90AA1 EIF2AK3  
CCNG1 PPP2CA  
FGFR3 CTSO  
PRNP FHL1  
EIF3I USP3  
SMAD9 PPARD  
FAT1 HOMER3  
TOR1A SNCA  
UBE2D2 DZIP3  
SEMG1 PRKCA  
MEOX2 HSPA2  
LSM3 LSM6  
ACTN4 MYOZ2  
CDC42 CDC42EP1  
CDC7 MCM2  
NSMAF MAP1LC3A  
INGX SUDS3  
DST NFYC  
FOS MATR3  
PAFAH1B1 CENPF  
F2RL2 NCK1  
IKBKB NFKBIA  
OMA1 LDLR  
PDCD6 PDCD6IP  
HGS TUBB  
TCP11L1 IKBKG  
LCK CBL  
PIM1 HIST3H3  
PARP1 HDAC2  
DPM1 TSC22D1  
MBTPS2 ATF6B  
ASCC3 G3BP2  
WDR48 PPP1R9B  
SULT2B1 ALS2CR12  
OXSR1 PAK1  
PRTN3 RELA

COL3A1 CAPN1  
ADD1 ADD2  
VTN TGFB2  
NCK2 EGFR  
VPS72 RUVBL1  
INSR PTPRB  
LCK GAB2  
TEC BTK  
INSR PTPRG  
MITF EP300  
ATP2A1 IRS1  
ARPC2 SNRPD2  
ARPC2 SNRPD3  
PSMD11 FAM190B  
UBE2D2 RNF130  
ARPC2 SNRPD1  
MAPK1 IQGAP1  
FANCA ZNF24  
LCK CTNND2  
GCLM ARF6  
SS18L1 EP300  
SMARCA4 KLF1  
RARA NKX2-1  
NPPA RORB  
TP53 PTGS2  
STRN CCT6A  
FYN STAT1  
KRT18 RHPN2  
CDK1 CDKN3  
NFKBIE ANKRD28  
VTN COPS5  
PTPN1 COLEC11  
GRIA4 CAMK2G  
SMAD1 FHL5  
PTPN1 CLK2  
RFC2 CHTF8  
PFN2 PTPRS  
BMPR1B RAB25  
PKM2 HERC1  
PRKACA CAV1

ZFYVE9        PPP1CA  
ATAT1 EHMT2  
CNOT3 CREBBP  
ANXA3 UNC119  
ANK1 NBPF3  
FASLG CACNB3  
ZFYVE9        PPP1CB  
EIF4E EIF4B  
PRKCQ RASGRP3  
HDAC3 BCL11B  
EPB41 YWHAQ  
SPOP RTN3  
CD2BP2        SF1  
STK3 RASSF3  
PLSCR1HEY2  
MAGEC2        USP7  
CCNB1 PTCH1  
FN1 SREBF2  
EIF1B UCHL5  
EIF4A3 UPF3B  
RRAGBRRAGD  
SREBF2OS9  
DYNLT1        Bmpr2  
Bmpr1B        RAB38  
STX1A FAM190B  
UBE2D2        RNF150  
CRIP2 GATA6  
CPSF4 CDC73  
NGF SORT1  
PTPRC TNK2  
ST13 GABARAPL2  
CD4 CCR5  
ZNF24 UBXLN4  
NCK1 ERBB3  
PPIL2 CRNKL1  
RARA SNRNP40  
PPP1CCHDAC8  
PRKDC NCOA6  
POU2F1POU2AF1  
Rbfox2        DMRTB1

WWC1 FEZ2  
PRPF40A MAP1LC3A  
CDC42 CDC42EP4  
FOS BATF  
DDX6 EDC3  
PSME3 ZCCHC10  
CDK2 CNTN2  
MCM3 TSC22D1  
NCK1 FRS2  
FNIP1 MAP1LC3B  
TUBA3C MAP3K14  
GNG12 RIPK3  
GNB3 TGFBR1  
STX5 SCFD1  
OTUD4 KRT31  
GAPDHLAMA4  
ETS1 CREBBP  
VAMP7 PHLDA3  
SGCB SGCA  
CHRNA5 CHRNB4  
UPF2 EXOSC1  
HIST1H3J ASH1L  
MUC5B MAP4K5  
COIL SCYL1  
TALDO1 ARF6  
ACTA1 HDAC1  
ASS1 AKTIP  
TARBP2 TGIF2  
AP2B1 AP1M1  
ATXN1 KAT5  
BMPR1A RUNX2  
PSMA7 IKBKE  
RPS6 NCBP1  
HNF4A NR1I3  
ACAN TNFAIP6  
CUL2 PFKFB3  
HRAS GPSM2  
MAGEA11 TCEA2  
FTH1 UBR1  
CACNA1B PDLIM5



KIF5C MAP3K3  
USP49 MED18  
YWHAQ MED1  
SUMO1 FZD8  
FAM40A SIKE1  
PML BANP  
POU2F2RXRA  
IRF7 ALK  
TCEB1 PINX1  
PAFAH1B2 ZFP36L1  
DST DTNBP1  
FLNA DRD1  
MRPS16 PRKAB1  
S100A4 MYH4  
ZFAND5 RIPK1  
POLR2C ITCH  
SIN3A BRMS1  
PRKCB RRAD  
APC KIFAP3  
RFC2 CHTF18  
INSR JAK1  
BIN1 DNMI  
MAPT PRKCD  
TRIM23MLH1  
TNNI3 RCAN3  
SNAP29STX1A  
HSP90AA1 PIM1  
PLSCR1C10ORF62  
ACTN4 MYOZ1  
INSR SNX6  
THOC5 THOC1  
PDIA2 P4HA3  
GABARAP TFRC  
UBE2D2 TRIM55  
PARK2 CDK5  
ECHS1 GABARAPL2  
TOB1 SCMH1  
VWF ITGA2B  
PRKCE PPP1R14A  
CA12 C15ORF29

NCK1 RYR1  
PHB SEC61A2  
HNRNPC DHX9  
EGFR CASP1  
PRNP MPG  
CASQ2 TRDN  
FOXO3 SIRT3  
SRPR SSR2  
RELN LRP8  
EEF1D GARS  
ETS1 TCEAL3  
PDE9A PHYHIPL  
SFSWAP RNPS1  
ELF3 FSCN1  
HSP90AB1 RPL5  
LSM1 NARS  
RAD51L3 EFHD2  
NGFR NTRK3  
USP7 PPIL4  
EEF1A1SRRM1  
HDAC3 SKI  
PTPRC ANP32A  
RHPN2 CNKSR1  
DCTN2 IKBKE  
DHX36 ACP6  
PARP1 CREBBP  
BCL2 MAPK3  
MYO1CBAZ1B  
LCK IL2RB  
DPM1 MAGED1  
IDE ZHX2  
PPP2CB CCT7  
SCNN1A NEDD4L  
XPO1 BECN1  
CTNBL1 PRPF19  
EIF1B RHOB  
MAPK10 DUSP10  
ACTN2 GPRIN1  
RPAP3 UXT  
NLRP3 CARD8

PXN PTPN12  
HMGB2 APEX1  
CHD3 SLC27A6  
SUMO1 HIPK3  
ARHGEF7 SCRIB  
ARHGEF7 GIT2  
NPM1 HDAC1  
GZMB PRKDC  
RALA CALM2  
SET WDR48  
GOLGA2 TRIM29  
REST SMARCC2  
GABARAPL2 RASSF5  
APC MACF1  
TIE1 MDFI  
IGF2R GGA1  
IGF2R GGA2  
NTS MEP1A  
CCDC85B PSMF1  
FXR2 RBMX  
SRC WAS  
ENO1 YWHAZ  
TRIM63 MYOT  
ADRB1 MAGI3  
BCR MAPK6  
ERCC5 EWSR1  
XRCC6 SRRM2  
DES S100A1  
CUL3 CAND1  
GRB2 RAB8B  
ACAN FBLN2  
MTUS2 RIBC2  
GRB2 SMARCC1  
GRB2 SMARCD2  
FGFR1 CREBBP  
NR4A1 SMARCE1  
GRB2 RAB1B  
SUMO1 HIPK2  
AXIN1 GSK3B  
AXIN1 GSK3A

SMARCA2 SMARCC2  
KLRC4 ULBP1  
TRAF2 BIRC2  
PTP4A3 PCNA  
TRAF2 BIRC3  
CBX6 H3F3B  
EXOC3 RALA  
CDK8 CCNH  
DRD2 NSF  
HSPE1 ZHX1  
PLK1 PIN1  
IKBKAP SNAPIN  
CSNK2A1 CTDP1  
A2M RAD23A  
PPP1CCPPP1R8  
PIK3R1 YWHAZ  
AIRE DDX17  
GRB2 MAP4K1  
PRNP APLP1  
CTSG F5  
EIF1B UBAC1  
TP53 COPS6  
IRAK2 TIRAP  
UBE2D2 RNF126  
IPO13 RPL5  
GRB2 KCNN1  
GABARAPL2 TP53INP2  
EEF1A1 TSPYL2  
EIF4E EIF4ENIF1  
XPO1 SERTAD2  
GRB2 GCDH  
GRB2 FOXJ1  
GRB2 RGL2  
FAM190A NDEL1  
IGF2 INSR  
HLA-B PFKP  
A2M CTSB  
CASK PRKD2  
GRB2 KHSRP  
NR3C1 CHD9

TARDBP XRN2  
CDK5RAP2 SENP2  
TFAP2A YY1  
MYBL2 CCNA2  
S100A10 TRPV6  
ILF3 NDRG1  
CRK SNX7  
SSSCA1LRRC7  
SKP1 FBXO17  
FYN BMP8B  
COL8A1 KLHL12  
CAPN1 RCAN1  
IKBKE PHB2  
GRB2 EXTL1  
PHB2 COPG  
GRB2 BAD  
CBX5 SUV420H2  
GRB2 PTPRN2  
BCL6 PPARD  
TCEB1 ZYG11B  
RRAS2 RAPGEF4  
STXBP3 SNTG1  
CASP1 BID  
SRC GAB3  
SNW1 DAXX  
IMMT C10ORF88  
PCNA POLQ  
CLNS1A LSM11  
GRB2 TNPO1  
PPFIA2 PTPRF  
EIF4E SMYD2  
DSTN PINX1  
GGA1 SYNRG  
PCNA CDK5  
GRSF1 FTSJ1  
STYX CARHSP1  
IKBKB PPP1CA  
PCNA CDK6  
PRKCA ATP2B2  
USP32 MRPL39

PRKCI GABARAPL2  
F2RL1 COPS5  
GRB2 SNAPC3  
GRB2 PEX13  
HDAC3 RBBP7  
GRB2 RIT1  
GARS YWHAZ  
CDK1 RRM2  
EGF S100A4  
XRCC5 VAV1  
TNIP1 RBFOX1  
TKT ATG5  
TRIM63 UXT  
ABL1 TERF1  
PHYHIP PPIE  
MEGF6 ATN1  
GRB2 TNFRSF14  
GRB2 PRG4  
ARFIP2 ARF3  
GRB2 KCNB2  
GRB2 SLCO2A1  
PICK1 LRP2BP  
GALNS NEU1  
PRKAG1 PRKAB1  
LTF NDUFA2  
HDAC1 EZH2  
CAPN1 INPP4A  
CASP1 PLA2G4A  
INPP5D CD300LF  
PDGFRB GAB1  
MS4A2 PRKCD  
TGFB1 ARHGEF6  
SRC PTPN18  
JAK2 IL2RB  
NOL3 CASP2  
TTI1 TELO2  
IKBKB CALM2  
CPNE4 UBE2O  
ERBB2 PTPN12  
PLCG1 CAST

EIF4E EIF4EBP1  
TLE4 CUX1  
CDK2 ID3  
CD4 CD53  
PCBD1 WWP1  
MAPK3 PTPN11  
EIF4E EIF4EBP2  
GRB2 DLX4  
AIP TNNT3K  
BTK KHDRBS1  
C1R SERPING1  
EXOSC8 MPP6  
PARP1 HIST1H1C  
VTN IGFBP5  
RTN3 UGCG  
PTK2 MAPK8IP3  
NUP37 NUP85  
TPT1 MLC1  
SMAD3 CDC16  
CALM2 REL  
RFC4 RPAP2  
ELN FBLN2  
ITGA7 MYOC  
SRSF1 LNX1  
RPS27AHDAC5  
CDC42 PLEKHG2  
AP1M1 KIF13A  
HNF4A PROX1  
CALM2 TRAF6  
CCT5 CDK9  
RHOC MCC  
GRINL1A ZNF410  
PTPRC CD79A  
RAD23A PSMD1  
NOL4 CTBP2  
MTSS1 CTTN  
YWHAZ KLC4  
TNNC2 TNNT2  
ARF6 CYTH2  
CHAF1B CNOT6

WT1 WTAP  
DYSF ANXA2  
PGR SMARCE1  
RAI1 TESC  
KAT2B GATAD2B  
ABCA1 RIMS2  
PRKACA ATF1  
EGFR PRKCA  
NEFL HSPB3  
GOLGA2 POM121  
COPS6 FBXO22  
XRCC5 SGOL1  
BCR BLK  
HNRNPL TNFRSF14  
GYS1 MAP1LC3B  
HIST1H3J PAXIP1  
NBN XRCC5  
NCK1 SNX7  
SREBF1SMARCD3  
APOH LRP8  
CXCL1 CXCR1  
CXCL1 CXCR2  
TP73 RB1  
MED7 CDK8  
ZBTB43BDP1  
XRCC6 PAFAH1B3  
AIRE SMC1A  
CTNNBL1 WDR77  
VASP TRIM9  
DUSP4 MAPK14  
CBX5 HDAC4  
NFKBIA PRKCI  
SPAG7 ABHD16A  
HNF4A CREBBP  
PLA2G4A C17ORF59  
CORO1C RIPK3  
PARK2 TUBA1A  
GATA6 KLF2  
GBP2 PPP1R8  
S100A2 MDM2



HNRNPH1 TAB2  
NONO SRRM2  
PTN CDK5RAP2  
ADRBK1 MAPK3  
RAB11B RAB11FIP2  
DAND5 LDB1  
UBE2D2 UBE3A  
IMMT AKTIP  
EIF5 YWHAG  
EFTUD2 GSTK1  
CCDC67 CCDC85B  
PHLPP1 SNX27  
EXOSC10 EXOSC5  
PTPN1 GSK3B  
KLF8 CTBP2  
C2 PSMA4  
TRIM23 UBE2H  
MED7 UBAC1  
RNF103 UBE2N  
HLA-A MAGEA1  
PAK2 GANAB  
AR ZMIZ2  
HLA-A MAGEA4  
ITGB1 DOK1  
FANCA GNB2  
CD5 CBL  
KPNA3 HNRNPC  
PDGFRA JAK1  
XRCC3 RAD51L3  
CNTNAP2 ZMIZ1  
CAD PPP2CA  
TFPT ELL  
MATK PXN  
RGS19 CSNK2A1  
RGS10 GNAZ  
TCEA2 TNPO1  
PMS1 AKAP9  
CDK9 CLSPN  
SCEL SFN  
ACTN1 APC

RNF103 UBE2D3  
TRAF4 MAGED1  
IKBKE ZC3H15  
CCND1 NCOA3  
DCN COL4A3  
U2AF1 SRSF1  
NHP2L1 TRAF6  
GC ACTA1  
SYN1 RASA1  
IFIT3 APOE  
AKT1 CHN2  
EGFR PRDX1  
SRF MINPP1  
CADPS2 MEGF10  
GRB2 COPS5  
MLH1 XRN1  
DDX58 UBE2D2  
PPP1CAHEYL  
DEDD ARID4A  
ABL1 EGFR  
OPRM1 CALM2  
G3BP1 MRPL45  
MC3R MRAP2  
GIPC1 SH3BP4  
PAK1 GIT2  
PAK1 IKBKE  
RB1CC1 TBK1  
HMGB1HOXD9  
UBE2D2 NFX1  
WBP4 CHTF8  
GNG11 AMOTL2  
HMGB1HOXD10  
IKBKB PPP1R15A  
LRIG3 TDP1  
RPL38 TSC22D1  
PAK1 ARHGEF7  
NMT2 BCL2  
PRMT5 MYSM1  
ETS1 JUND  
GAPDH PPM1E

EFNB3 RHBDL2  
RHOB NGEF  
MAP3K7 HIPK2  
CNTNAP1 RTN4  
STXBP1 STX1A  
NCOA6 ASCL2  
GBAS MTA2  
HSP90AA1 RPS27A  
CCNB1 PIN1  
MAPK3 SCRIB  
XRCC6 NCF4  
LRAT RBP2  
RANBP1 FTSJ1  
STATH MUC7  
CDKN2A KAT5  
RRM1 RRM2  
SELL MUC7  
PTGS2 CAV1  
MAPK6 PREX1  
ITGB3BP ACAP3  
STK16 VHL  
CCR10 PRRC2A  
C1QB HRG  
PEX14 TRAP1  
UBE2J2 RNF10  
EEF2K MAPK13  
PRC1 KIF4A  
RBBP6 ZBTB38  
AKR1B1 DSPP  
PARK2 CAMK2A  
CRB1 DDX56  
FGFR4 FGF8  
RPS27APAIP2  
DGCR14 LYST  
NDN MPP6  
SGK1 PIK3CA  
PPP2CBPPP2R2A  
SPTBN2 PRKCB  
USP49 NUP85  
RGS3 SCN5A

HDAC2 SAP30L  
SYNCRIP SYT3  
E2F1 TOPBP1  
SMARCA2 JOSD2  
CASP3 PRKDC  
YY1 FKBP3  
HBXIP VOPPI  
CACNA1B MRFAP1  
FBXO38 USP7  
PRSS23 NIPBL  
CDC37 AKT3  
ARAF MAP2K2  
KCNIP2KCND3  
AIFM1 RELA  
SRC PPP2R4  
U2AF2 GLIS2  
PCYT1A CASP6  
PPP2R3A NKD1  
LPL COPS6  
MMP14 C1QBP  
MCPH1 SMARCC1  
KIF15 KIAA1377  
PML CDKN2A  
DDB1 TRPC4AP  
RRH TGFBR1  
SF3B4 SRRM1  
GABARAPL2 KBTBD7  
EIF1B TCEB1  
EIF1B PCBP1  
PARK2 UBE2G1  
UBE2E1 MUL1  
CNTN2 IKBKG  
EEA1 STX12  
NDUFB6 TMBIM4  
USHBP1 SMARCD1  
HDAC1 SENP1  
PLA2G10 PLA2R1  
RAB17 SMURF2  
PCNT TUBGCP2  
NPM1 MAP3K1

EZR RANBP2  
SDPR PLEK  
TRIM23 CYTH1  
PTPRS UBR1  
ETS2 GATA3  
GAPDH YWHAZ  
ERCC6 XAB2  
THAP11 SIN3A  
TRIP13 MPPED2  
DDB1 WDTC1  
TLE1 RUNX3  
CYP27B1 RUNX1T1  
NXT1 PRKAB1  
PSMB2 PLK1  
SLC9A3R1 MAX  
CDH1 CA9  
NGFR CAV1  
TRIM37 COPB1  
XRCC6 YWHAZ  
GOLGA2 NCSTN  
GTF2F2 TRAM2  
TTI1 TRRAP  
CASK TSPYL2  
EFS SRC  
EIF1B RHEB  
RPS27A OTUD5  
HDAC1 HMG20B  
CFLAR RIPK1  
PDHX EWSR1  
PSMA3 PLK1  
PARK2 RNF41  
UBE2H ZBTB17  
SND1 LZTR1  
RELB RELA  
FOXH1 SMAD2  
FKBP5 STK11  
PCBD1 PCBD2  
APC RORB  
LCP2 WNK1  
IKBKAP GSK3B

CTPS TRAF6  
IKBKE PDCD6IP  
ABCC8 KCNJ8  
UBAP2L TOLLIP  
EPPK1 PINX1  
TJP1 KBTBD7  
HNRNPC FXR2  
SOCS6 TUBB2C  
NCK1 FAM110A  
EGFR PDK3  
ACTB MYO1G  
SLC2A1PTK2B  
NAA15 TNIK  
PRKCB CCDC57  
FANCD2 RAD18  
SOCS2 PTK2  
HIST1H4I UHRF1  
NCK1 SNX12  
TRIM27TAL1  
PSME3 WDR48  
UBE2D2 MARCH3  
FYN TMPO  
CCNA1 VPS18  
AIRE CREBBP  
INADL DDX18  
TRIM37MCRS1  
HAMP SLC40A1  
PARP1 RRP1  
HNF4A NCOA6  
PARP1 NCOA6  
SURF4 C20ORF24  
RPF1 RUVBL1  
AMOT LONP2  
SOCS5 KIT  
NASP H3F3B  
CCNT1 EP300  
ARL3 TBCD  
FTH1 CSF3R  
SEPT4 SNCB  
LYN CASP7

LYN CASP9  
TMPO FYCO1  
COPE COPG  
HRAS RASSF5  
TKT TNFRSF10D  
TYK2 PLAUR  
PRKCD AFAP1  
CD36 MATK  
RPS3 MEPCE  
EFHC1 TEX11  
CD40 MYCBP  
DES MLH1  
SCFD1 USP22  
FRA10AC1 VPS29  
STXBP2 STX1A  
YES1 PDGFRB  
HSPE1 C14ORF1  
HRAS RASIP1  
UBE2U RNF2  
DRD2 KCNJ9  
YWHAH PARD3  
ATF6 CREB3L3  
TCP1 MOBKL3  
NCK1 DOK1  
CASP1 BCL2L1  
RFC2 PITX2  
ACTL6A ARHGDI  
PTP4A3 HEATR1  
FLOT1 SHBG  
AIFM1 MLH1  
FADD NACA  
WDR61 SMURF1  
ACTN2 ATXN2  
CTBP2 TEAD3  
ATXN7 USP22  
RAB10 AP1S1  
ABI2 CCDC53  
HOXB9 ING4  
MAPK1 DUSP1  
COPB2 SACM1L

MYB NGFRAP1  
TSFM YWHAZ  
MCC PNPT1  
TP73 CDK1  
COL1A1 SPARC  
ANKLE2 ZNF512B  
BCL2 BFAR  
HCFC1 PPARGC1B  
MCM5 ORC3  
ARPC3 WAS  
TCAP ATXN1  
COPE RPS27A  
CASP6 CASP10  
NCK1 BLNK  
PTPRC GANAB  
MAX PALMD  
ARPC3 CDKN2B  
RNF7 ASB1  
GDF9 ORAI2  
EXOC5 ARF6  
YY1 MAX  
DHX57 DDX56  
EIF3H EIF3G  
EIF3H EIF3J  
RNF185 UBE2E2  
FLNA ARRB1  
TCEAL1 TCEAL2  
TM7SF2 RAP2A  
KDR SYNGAP1  
TUBA3C NMI  
PDCD6 MAP3K5  
PPP2CBCTTNBP2  
BCR RAC1  
INPP5B SMURF1  
SUPT5H IKBKG  
MAPK3 NCKIPSD  
CFL1 TESK1  
SERPINA1 KLK13  
CASK KCNJ2  
EXOSC2 ZNF408



CCDC7 EWSR1  
RPS14 TAF9  
CHD3 THOC7  
TCFL5 TOPBP1  
MCM10HOOK2  
STX5 VCPIP1  
SMARCC1 SMARCE1  
PRF1 DDX24  
MED11 MED19  
RBPMS FASTK  
ATXN3 ARHGAP19  
RASGRP2 PTCHD2  
PPM1B VAV2  
RPS27A TTYH3  
CEP70 ZNF408  
FANCF GINS2  
RFXANK NFKBIL1  
CDCA8 SGOL2  
ATF3 SMAD3  
GADD45B GADD45G  
SRSF1 RP9  
ETS1 USP13  
DPM1 BRF2  
ACTA1 MYO7A  
PRPF3 GTPBP3  
CD2BP2 IBTK  
GTF2I NFKB2  
PSTPIP1 CD2  
FLNA RAC1  
PPP1CCSMARCB1  
SMARCA2 RAN  
SUMO3 EP300  
NCK1 C3ORF10  
ZFP36 YWHAH  
YWHAE TFD2  
TP53 NPM1  
CCT6A GPN1  
KRT18 BBS7  
KLF1 SIN3A  
AP2A2 DNM1

HDAC3 HIF1A  
POR CYP2C19  
PMS1 USP13  
PIK3R1 RAC1  
PSMD14 PAAF1  
BSG RPS27A  
INSR PIK3R1  
JUND ATF3  
DAND5 SUB1  
ABL1 RAPGEF1  
HAND1 FHL2  
MLL2 E2F5  
CASP8 EDA2R  
CUL2 HIF1A  
PIK3R2 CSF1  
GRB2 TAF15  
EFTUD2 SREK1  
ESR1 PARP1  
IGF1R GRB10  
TMEM33 TSC22D1  
MAP3K7 HSP90AB1  
PRKCH PRKD1  
PIM1 PTPRO  
RAB5A EEA1  
NF2 TARBP2  
ANXA13 NMT1  
CALM2 CAMKK1  
UBC MAP3K4  
FAM124B EFEMP2  
BCL2L1RAD9A  
CD99 UBQLN1  
CALCOCO2 FBXL18  
DEC1 VIM  
KRTAP4-12 ZNF408  
ZNF24 ZNF165  
XRN1 NDUFA13  
AGXT SNCAIP  
RNF38 TP63  
PLCG1 RASA1  
MDFI ZNF559

EGFR PRKD1  
EIF1B RPL36  
CTNND1 ACTG1  
LSM1 FAM136A  
ORAI2 MED31  
SMARCA4 RELB  
FBL ACTB  
CCNB1 SET  
F2 F5  
ISG15 TRIM25  
PLSCR1CNTFR  
IMMT MRPL44  
PCBD2 ASCC2  
UBC IKBKG  
RPRD2 WWOX  
TP53 SHISA5  
TP53 S100A6  
EGFR PLEC  
PRKAB2 FANCI  
SRF FHL5  
PIK3R2 PDGFRB  
TIMP3 EFEMP1  
INSR VAV3  
WIP1 KCTD15  
TRAF4 MAP3K4  
CATSPER1 CACNA1I  
ITGB1 TLN1  
TNFRSF1B TRAF2  
TIMP2 PCMT1  
CASP3 WNK3  
UBE2D3 RNF38  
YWHAB MAP3K2  
HSPA5 YWHAB  
HK3 ZBTB17  
GATA1 SMARCD1  
AIMP2 TRAF6  
AP4M1 AP4B1  
TLX3 HIST1H2BJ  
DDOST GSTK1  
ADRB2 ARR3

CPE ROBO2  
EIF1B RPL31  
EXOSC9 EXOSC4  
PEBP1 VHL  
LDLR PCSK9  
APAF1 CASP8  
RAPSN UBE2Z  
FTH1 GOLM1  
CXCR1 ADRA1A  
PAK3 APC  
UBE2D2 CADPS2  
LIN7A AMOT  
GRB2 INPP5D  
ACTA1 TAGLN  
LYN DAPP1  
ATN1 PSME3  
TSC2 YWHAE  
PDGFRB SNX1  
MPHOSPH6 SNX9  
MRPS15 PTC3  
CD40 PSMD1  
KAT2B JDP2  
AR FOXO1  
APLP1 HSPE1  
SUPT3H USP22  
HNRNPK RPS27A  
TLR2 TLR10  
PTHLH CDK2  
TK2 UNC119  
UBTD1 TRIM39  
SREBF2MGA  
SRF BARX2  
PCBP4 RBFOX1  
RNF123 UBAC1  
ERBB2 CRKL  
HNRNPK GRB2  
MEF2C MAML3  
F9 F7  
RFC4 YWHAZ  
ERBB2 CRK

ATRX ATN1  
RPS27A PELI1  
RAP2A RAPGEF5  
EIF3F ABCE1  
RYR1 GRB2  
UNC119 ITSN1  
ZZEF1 PHYHIP  
RAC1 PLD1  
HNRNPA1 IGF2BP2  
HGS UBA1  
BSG PPIA  
TCEB1 SPSB4  
RINT1 RAD50  
PSMB6 TRAF6  
AR PNRC1  
EIF4G3 NCBP1  
TRIM23 ARF6  
BRD4 CHFR  
PSMB5 VHL  
CD177 KCNIP3  
USHBP1 CCDC120  
TRIM23 SF1  
KIF5C CSNK2A1  
RIPK2 HSPA1L  
MCM10 HAUS1  
MED14 HNF4A  
ATN1 MEGF8  
NEFL CHD3  
RPS6KA1 BAD  
BIN1 TP73  
PRKACA SLC4A5  
HELZ GRB2  
UBA52 GRB2  
CRHR2 UCN3  
GRIA2 GRIP2  
FLNA MAP3K3  
SF3B1 MYC  
SLC38A1 INSL6  
B3GALT4 DDX19B  
CD2BP2 C5ORF41

BAG3 PLCG1  
RPS27AFOXO1  
DGKZ SNX27  
UCN CRHR2  
ACTB SPTAN1  
GAPDHDYNLL1  
RYS1 FKBP1A  
LGALS12 CARM1  
RPN1 GABARAPL2  
SLC9A3R1 SLC22A11  
DBP TEF  
NUP93 PNKP  
FGR SNCA  
NCOR1 POU1F1  
ORC3 GRAP  
HNF4A RAD50  
GNAI1 GPSM2  
MAEA MYOC  
VAMP2 VAMP8  
PLA2G7 TUBA1A  
LCN1 LYZ  
CBX5 CHD1L  
ITGB1 RABGAP1  
PHB FSIP1  
SNAI3 HDAC2  
HLA-DMA HLA-DMB  
EFTUD2 RUVBL2  
MYOG SMARCA4  
TM4SF1 SDCBP2  
GC ACTC1  
CCND1 NCOA1  
RBPMS EWSR1  
PSMC2 RAD23A  
ZNF217 KDM5B  
SUMO1 GCM1  
OTUD6B OTUB1  
CDK1 CDT1  
MAP4 PIK3R1  
AIMP1 AIMP2  
PSMC2 RAD23B

ACTN2 EPS8L1  
PSEN1 HERPUD1  
AR KIF1A  
ZFYVE9 ST7  
RAE1 FAM122B  
FLNA FBLIM1  
TRPC4AP CHMP4C  
TUBB2A RIC8A  
PIM3 BAD  
HIST1H4I NR1H4  
DDX58 RPS27A  
ZMYND11 ZHX1  
MYC XPO5  
CCDC85B CCDC11  
CDC25A BTRC  
C10ORF62 MDFI  
STMN1 CDKN1B  
UBE2D2 RNFT1  
CD2BP2 SF3B4  
GTF2E1 TAF6  
EP300 ZNF148  
ITPR3 TRPC7  
FLNA SMAD5  
STX5 SEC22A  
RPF1 RNF11  
ATN1 ARF3  
VPS41 HOOK3  
MAX SMAD4  
CTPS PRKAB1  
PFN2 FLT3LG  
SSSCA1 IL16  
FAM173A HAP1  
NCK1 PXN  
PLS3 FTSJ1  
LAMP1 TNFAIP3  
RAN VRK2  
COCH COL4A1  
HSPA9 REL  
SMAD9 ARID1B  
CALB1 IMPA1

YWHAB STK38L  
ATF3 SMARCA4  
IL7R PIK3R1  
PRNP LSAMP  
TNNI3 TNNI3K  
PFN2 IK  
CTR9 WDR61  
HTRA2 CSN2  
MYL12B USP45  
CD200 CD200R1  
POLR1B EIF3L  
MDM2 NUDT9  
CCR3 CXCL9  
BIK BCL2A1  
SRC PRKD1  
GFAP CAMK2A  
GNAI2 CHRM1  
BET1 STX5  
CLSTN1 TRIP12  
PUM2 MED23  
RANBP2 ADRM1  
SKP1 FBXO11  
BRD1 KIAA1377  
MYC FBL  
HRAS RHEB  
CEBPD PIAS4  
SNTB2 ERBB4  
NAGS TMEM39B  
MAPK3 STAT3  
STC2 PTN  
YWHAB EPB41L3  
MED26 MED23  
PTPRA CALM2  
PRPF4 USP39  
DYRK1A PHYHIP  
XPOT RAN  
DAZAP2 FAM46C  
CAPNS1 CDK4  
PIAS2 DNMT3A  
CYBB CYBA



NPM3 KIAA1377  
GABARAPL1 ANKFY1  
RPA3 PKIG  
PSMB5 TMBIM4  
BIN1 CUX1  
LMNA NUP153  
SYNCRIP SYT1  
PAXIP1 SRRM1  
COCH COL1A1  
KEAP1 GABARAPL1  
COCH COL2A1  
ABL1 TP53  
TCEB2 MED8  
GCA RBFOX1  
INPP5F GOLGA5  
DAPK1 RPS27A  
ACVR1 PAK1  
RPS27AUBA6  
HNF4A COPS5  
RPS27AIL17RA  
ZFYVE9 CTNNB1  
NOV POLR2L  
USP7 TBCB  
BRCA1 APLP2  
EIF1B STRAP  
SMARCA4 NEUROD1  
GADD45G RAN  
ABL1 ERBB2  
ABL1 NTRK1  
DDX5 CDK9  
YES1 TYRO3  
LCP2 SHB  
CDC34 CREM  
CCDC85B TTC14  
YWHAZ AKAP13  
IKBKB PRKCQ  
PDHA1 DLAT  
KATNA1 KATNB1  
ACTA1 PLD1  
GGN GGNBP2

LAMA1 COL7A1  
ACAN ADAMTS1  
FYN NMT1  
BIRC2 CASP8  
MATR3 MAP3K3  
HSPA5 CASP8  
CDKL5 MECP2  
SRSF6 RNPS1  
SRC SEPN1  
UBE2D2 ING4  
ITGB7 ITGAE  
HADHBMAP1LC3C  
SLC2A4MAP1S  
RPIA LNX1  
TOP2B HDAC1  
RET GRB2  
GAPDHMYOC  
CALM2 RIPK3  
USP11 USP15  
SMARCA4 HDAC1  
CDC27 HOXC10  
RAB7A RAB4B  
MLH1 ACTG1  
ACTN2 TUBA4A  
ZNF513 ZFP64  
IKBKB ACVR1  
KIF5A KLC2  
MLH1 ACTG2  
CSE1L YWHAG  
DLG1 MPP2  
SMAD1 SMURF2  
TAF9 SERINC1  
CCNT1 MAX  
NCK1 NOTCH3  
PSMD14 PSMD7  
MYC GTF2B  
CD2BP2 CD2  
ABL1 BCL2L1  
VASP XPO6  
FCHO1 ACVR1

JUND MDM2  
TBC1D4 TOPBP1  
PARK2 PSMC5  
MAFG MED31  
PAFAH1B3 INSL6  
DRD1 DNAJC14  
HBXIP MAF1  
DNAJA1 TRAF2  
A2M IL1B  
COX5B TH1L  
H2AFX OBFC2B  
PSMD3 PSMD4  
CDC27 ANAPC11  
PRKDC AP1B1  
USP46 PHLPP2  
ABL1 SOS1  
MDM2 GNL3  
WDR5 RFWD2  
SIRT2 ING1  
TGFA ELANE  
PHLPP1 GSK3B  
EDIL3 ITGAV  
SERPINB9 TLE1  
NFKBIA CLTC  
CALR YWHAZ  
NUP214 SMAD4  
RRAS EPHB2  
IRF2BP1 PCBD2  
CRKL PXN  
KPNA6 CSE1L  
TUBA3C MAP3K3  
RPS27A CHFR  
SULT1E1 SETDB1  
CDK1 TSPYL2  
USP8 EPS15  
MED6 RARA  
TNK2 SRSF5  
HNRNPA2B1 SF3A2  
UPF1 UPF2  
NUP43 NUP37

SOCS6 TUBD1  
BIN1 XRCC4  
RPS27ARNF125  
DYNLL1 MAST2  
SQSTM1 MAP1LC3A  
GNB2L1 PRKCE  
AKT1 NOTCH1  
UBC SNX9  
DDX3X TOB1  
OAZ1 SMAD1  
NCK1 TPX2  
RND2 FNBP1  
TCEB3 CUL5  
AKT1 CDKN1B  
PXN PPP2CA  
TERT ABL1  
BIN1 RIN3  
RPF1 THRAP3  
VPS45 VPS18  
MKNK1LUC7L  
SP3 HDAC2  
TERT TPP1  
EVI5 AURKB  
TGFB1 YWHAE  
ERN1 TAOK3  
CDK5RAP2 KAT5  
TAL2 TCF12  
POLD1 NCAPG  
AP2B1 TUBGCP4  
SERPING1 MASP1  
AIP HSP90AB1  
PTPRC MET  
DBN1 NIPBL  
E2F3 TEAD3  
YWHAZ TSR1  
CDH2 PTPN7  
LCK CSK  
COPS6 TOR1AIP2  
BUB1B KAT2B  
HUS1 YWHAZ

BCR YWHAZ  
NFKBIA NFKB2  
GABARAPL2 PDCD6IP  
USP7 RNF2  
CDH2 CTNNA1  
CDH2 CTNNB1  
DVL2 ZNF165  
PDCD10 STK24  
SGTA HLA-B  
CD82 IGSF8  
RPL35APRKAB1  
LIMA1 RIPK3  
RPS6KA3 MAGI1  
DHX57 LYAR  
PLK4 SFN  
SP3 CREBBP  
DFFA CIDEB  
PSMB6 EZH2  
RYBP CASP10  
TFE3 ACLY  
ACTN2 MYOZ3  
ERBB3 SOS1  
PTP4A3 UNC45A  
GEMIN4 SRRT  
LYN CBLC  
CCNA2 CDKN1C  
TAF1C TAF12  
GIPC1 MMS19  
LRPAP1 LRP1  
RFXANK TBR1  
CHEK2 PLK1  
HLA-B NASP  
RPS24 NFKB2  
KPNA1 HIST2H2BE  
POLD1 TREX2  
PTCH1 IHH  
UCHL1 ATG5  
ABL1 SOS2  
MBP IRAK1  
DMWD WDR48

AR PA2G4  
JAK3 SHB  
SRC GLTSCR1  
PDE6D RAB18  
PTPRC CTNNB1  
AGR2 MED31  
BCR TCF7  
ABL1 SHB  
VHL TCEB3  
TARS PRKAG2  
RAD23B PSMD6  
GABARAP SQSTM1  
TAF1B RRN3  
DNAJB1 ATG2A  
SNF8 TSG101  
RAD18 POLQ  
PCNA CCNB1  
PPARG USP11  
KRT77 USP53  
RPS27ASYVN1  
SPTAN1 PIN4  
HIST1H2BG DLG3  
APC ARHGAP21  
ARIH2 DISC1  
DCTN1 ZNF512B  
TRPC4 TRPC5  
MARK3 VPS11  
UBE2W FANCL  
TOR1A TOR1B  
SERPINA5 SEMG2  
LCOR HDAC6  
PTPRC IRS1  
ACP5 RPA2  
HTT PDK2  
MTA2 HIST1H3J  
RELB BCL7A  
C3 ITGAM  
ESR1 VAV3  
SYT5 NRXN1  
HNRNPM ARF6

RHO GNGT1  
SOD2 TNIK  
HLA-B SEPT2  
PLXNB2 MET  
PDGFRA CRK  
XPO5 GSTK1  
PDGFRA CRKL  
EGFR MDH1  
DVL2 DD1  
PTPRC TIE1  
XRN1 VWA5B2  
HIST1H4I MCM6  
RPAP1 IGF2BP1  
TRAF3IP1 FRMD4A  
ORC1 CDC5L  
ADAM10 GRB2  
SGSM2 PTN  
PTK2 CD47  
ITGB1 EMILIN1  
TAF1 PAX6  
HLA-B PSMD6  
ZFP64 C14ORF1  
TFG MAP3K3  
MMP8 BCAN  
PDGFRB CBL  
NME5 DYDC1  
EPB41 COPZ1  
KCTD13 LAMB4  
NUP62 G3BP2  
GRID2 MAGI2  
GCH1 SP3  
CCT2 MLST8  
PRRC2B USP3  
FTSJ1 WWC3  
BLMH ECSIT  
NIPSNAP1 MAP1LC3A  
IL6ST TLE1  
ABL1 SF3B4  
GRB2 PBXIP1  
ADRB2 GNA15

PDGFRB GRB10  
OTUD7B TRAF6  
NCOR1 ZBTB33  
UBE2U TRIM68  
NFYC ANAPC5  
PRSS1 DEFA5  
RHOB ARHGEF3  
BCL6 MUM1  
CHFR UBE2E2  
GTF3C2GTF3C4  
MMP2 PZP  
SUMO3 CHAF1A  
COPS6 DCAF4  
XIAP WDYHV1  
INSR SH2B1  
GH1 TMC01  
KBTBD10 RBX1  
FOXK1 BAP1  
MLL MAP3K5  
NPC1 OSBPL5  
CLDN2 TJP1  
EMX1 GTF2A1L  
PLCG1 SCARB2  
CDK2 MS4A3  
ACVRL1 XIAP  
GLRX MAP3K5  
APP BLMH  
SH3BP5TNKS  
PIK3R1 SYK  
XPO7 IKBKG  
PLCB1 RRBP1  
ANXA2 MYOC  
PSMD10 PSMD4  
RAB4A CHM  
UTS2D UTS2R  
HTRA2 APP  
ABL1 VAV1  
C5ORF30 MDFI  
CBR1 PRKAB1  
LRRN1 CA8



PAXIP1 DPY30  
GRIN3B GRIN2A  
ERBB2 DOK4  
NOS1 CAMK1  
ZBTB48DVL3  
PLCG2 SHC1  
SEPT2 SEPT8  
PPP2R1A PPP2R2A  
PIK3R1 CHRNA7  
PRPF40A FNBP4  
PPP2R1B PPP2R5A  
PPP2R1B PPP2R5B  
P4HA2 PRRC2A  
COIL MYBBP1A  
TRIM29EFCAB4B  
UBE2I SETDB1  
BAHD1 MEGF10  
IFIT5 USP33  
CDK1 NPM1  
RPS27AAMFR  
IFNAR1STAT2  
MAP1B ATG3  
SRF REL  
ANAPC4 FZR1  
PDPK1 PRKCE  
ANAPC4 ANAPC10  
AMOT DYNLL2  
EGFR PIN4  
LDOC1 IKZF5  
DDX5 TOB1  
EYA2 DMRTB1  
TOB1 SKP2  
AP3B1 ARF1P1  
NTNG2 EWSR1  
ENAH ABI3  
AGTR2 ZBTB16  
ARID4A HDAC1  
FSCN1 FANCD2  
PTK2 BEX4  
CLDN19 CLDN16

ZNF417 CEP72  
PFKL IKBKE  
TRIM21 NCOA3  
SUMO1 HELQ  
MAP1LC3B UBA5  
PRMT5 LSM11  
RPL23 RIPK1  
CALR TAP1  
FYN WAS  
RNF8 EXOSC2  
OGT FIBP  
UBE2I SUZ12  
VCP FAF2  
TAL1 STUB1  
TEC RHOA  
ORC1 ORC3  
PML MXD1  
CCNA2 CDC6  
RFC5 C7ORF64  
MCC PSMD13  
CRK TPX2  
NPM1 PML  
IPCEF1 CYTH4  
CLN3 CAND1  
APC2 TIMP2  
PTK2 CITED2  
CCND2 RUNX1  
GH1 CLPP  
FGA SERPINA5  
ZNF423 EBF2  
S100B SUGT1  
PTTG1 DNAJA1  
ATXN1 CIRBP  
HGS C1ORF190  
GFI1B JUB  
SNW1 OCLN  
PPP1R9B PPP1R9A  
CRK CBLC  
HSPA9 GTF2A1  
BAX BCL2L1

ERBB2 PAK1  
FN1 MYOC  
MT-ND5 SREBF2  
PPL OPRM1  
PMS1 EXO1  
BRMS1L ING1  
CCT8 CTTNBP2  
EPOR PTPN11  
AXIN1 SMYD2  
PTCD3 LUC7L2  
CYC1 CYCS  
UBE2V2 INSL6  
CDC42 ASAP1  
MLH1 SQSTM1  
EI24 UBE2D2  
ACTA1 TSC1  
CIT DISC1  
SHBG PTGDS  
DLG4 SYNGAP1  
CSDE1 PCSK7  
TCEB2 DIO2  
ACTL6A FLII  
CNBP RPL36  
OMP BEX2  
RBL1 NTHL1  
BAX MCL1  
HMGB1GTF2A1  
TBC1D7 IKBKG  
AKAP8 PRKAR2A  
CDKN1A CSNK2A1  
ESR1 HDAC9  
HIST1H1C NASP  
IKBKE PA2G4  
TGFB1 RHOH  
RPS19 SRRM1  
DNAJA1 FZR1  
ERBB2 SH2D5  
SIRT1 INGX  
PINX1 CNPY2  
ERBB2IP LRRC1

DLGAP3 NCK1  
CREBBP SNIP1  
RNASEH1 C20ORF94  
SIRT1 BCL11A  
CD44 TGFBR2  
GNGT1 IKBKG  
DNMT1 EHMT2  
NRL FIZ1  
RARA MECR  
CAV1 PRKCDBP  
PLRG1 PRPF19  
HMOX1AKT1  
TTF1 PTRF  
PFN2 EEF1A1  
PRKACA PTPRR  
PML SIAH1  
PTPN2 STAT5A  
HGS EPS15  
PTPN2 STAT1  
SRP14 LYAR  
ADRBK1 AKAP12  
TP53 TXN  
RFC1 ZSCAN1  
HLA-B LILRB1  
CCDC47 TMBIM4  
PDE6D ARL2  
PDE6D ARL3  
KHDRBS3 RBBP6  
CR1 FUT4  
NFKBIA TIMM50  
DST PTK2  
CASP4 GCN1L1  
ASB9 HIF1AN  
C5 C5AR1  
INSL6 RIT1  
TUBA3C TBK1  
SIAH2 PEG10  
GSTM4 TH1L  
SKP1 KDM2B  
GHR PTPRB

INS RB1  
RALBP1 EPN1  
TRIM24STAT6  
ATRN COPS5  
EEF1A1PLAUR  
SH2B2 SORBS1  
AFF2 SREBF2  
HNRNPU RELA  
TRIB2 UBQLN4  
CRKL GAB2  
TERT NCL  
SEPHS1CRMP1  
SMAD7XRCC6  
PTPRB GAB1  
DR1 POLE3  
GHR JAK1  
CCDC22 CPNE1  
EFS PTK2  
RPS27AGGA1  
HRAS PLCE1  
COPB1 GBF1  
STAT3 PIAS3  
CD4 TFRC  
RCC1 NUP98  
MARK4WNK1  
CAPZB MAP3K3  
NQO2 GORASP2  
TACC2 TTK  
WDYHV1 MDFI  
FGF2 CD44  
TRAF5 TNFRSF19  
SFN FAM189A2  
MYBBP1A PPARGC1A  
RNF4 UBE2E2  
VAPB STX1B  
RALBP1 IKBKG  
PTTG1 CDC27  
HMGB1TGIF1  
YWHAQ NCOA3  
PSMD4 UBQLN2

SRC ARRB1  
IKBKE PSMD1  
SMAD3 TGIF2  
YWHAG RASSF8  
RAP1A RASA3  
WNT5AFZD1  
DEC1 BHLHE41  
NFE2L1MAFF  
YWHAG PANK2  
PTN CGA  
RAE1 DDX19B  
CASP4 NUP93  
GPRIN1LRP8  
IKBKE PFDN5  
ATXN1 FAM46A  
SMARCA5 COBRA1  
PTPRF JUP  
CAD NFKB2  
PINX1 INVS  
POLR1E QPCTL  
VHL LYZ  
PRDX1 SESN1  
TRAF2 GORASP2  
ESR1 NR2C1  
HSPA1B KRT7  
APC2 CDC27  
RPS27AFBXW11  
RFXAP RFX5  
MAGOHB HMG20A  
E2F1 STOML1  
SUV39H1 CBX5  
ATXN7L3 USP22  
PRPF6 GIGYF2  
IL7R STAT5A  
ZBTB16HBEGF  
TNFRSF1B RPS27A  
SRPX2 PLAUR  
EXOC7 PRPF19  
PRSS23 GRK6  
AXIN1 CSNK1E

RPA1 AICDA  
ZNF136 CEP70  
USP13 NPLOC4  
LMNB1 EMD  
GH1 FSCN1  
TLR2 IRAK1  
PCNA MSH2  
CDKN1A RNF144B  
VHL HSPE1  
MICALL1 PACSIN3  
MAP3K3 WNK1  
STAM2 RNF11  
TNFRSF10B EZR  
IRS4 TNFRSF1B  
DAND5 EPAS1  
IL1A NDN  
SRSF1 DIDO1  
RELA CARM1  
MAPK14 FUBP1  
USP22 POFUT2  
ACP1 PAK2  
DNMT3B DNMT3A  
MYBL2 EP300  
CHD3 HABP4  
IGF1 IGF1R  
CNBP ERH  
DAND5 C3ORF17  
ACTB SSH2  
CDC42 C14ORF1  
BCL7B TBK1  
RAP2A EEF1A1  
NCK2 TRIP6  
RBL2 CUL1  
HNRNPM TBK1  
FLNA DMWD  
CHEK2 E2F1  
EIF4E PRKCA  
IKBKE HSPA1B  
YWHAQ CABIN1  
MAP2K4 MAP3K2

PAPOLA SMAD2  
ORC1 DBF4  
PCNA EP300  
ZFP161 ZNF295  
ENOX1 NIF3L1  
C19ORF50 EWSR1  
APOE PLTP  
PDGFRB SLA  
PRKAR1A CCNE1  
CAPZA2 RBBP6  
CAPN2 F2RL1  
MYOD1CARM1  
VAV2 RAD23A  
MEIS2 TRIM25  
HELZ TOLLIP  
UBE2D2 ELF3  
ANKRD13D UBQLN4  
TUBA4A MAP1A  
CRK ASAP1  
TNK2 RASGRF1  
SUMO2 RAD51  
ITSN1 ARHGAP31  
FYB SRC  
FOS CREBBP  
PTPN6 BLNK  
YWHAG FKBP8  
NCK1 MYRIP  
ADRA2A GNAO1  
PRPS1L1 SUMO4  
SIAH1 AFF4  
CIRBP LXN  
ACTN4 SERPINE1  
PHC2 SCMH1  
WIPF1 ZAP70  
CDC20 SOSTDC1  
CAV3 SLC22A11  
WIPF1 PRKCQ  
CR2 FHOD1  
MCM7 SUV420H2  
XPO1 NPM1



AZI2 TBK1  
ARPC3 RPS4X  
SVIL ESR1  
GDF9 STRN4  
CDH16 CTNNB1  
PEA15 LUC7L2  
YY1 EZH2  
USP12 MMP2  
REPS2 CDK5RAP2  
TBXA2R RAB11A  
PTK2 OCIAD1  
VHL DCTN1  
RECQL5 MRE11A  
RAB11A RAB11FIP4  
RBPJ HDAC1  
PIK3R1 PTPN4  
DIAPH1PKD2  
EEF1A2TRADD  
PTPN6 DOK1  
SYVN1 UBE2Z  
FTSJ1 NUDT5  
PWP2 USP36  
RUNX3 YAP1  
TEX11 VIL1  
TP53 HMGB2  
RRP1 SDF2L1  
SOX10 NMI  
NBEA STRN4  
S100A8 RAB17  
SMAD9 ZNF557  
FLNA YWHAZ  
LYN CRKL  
BCL3 HDAC1  
GATA4 ID3  
IRS4 MTNR1B  
USP19 TRIM21  
NPM1 NFYC  
SMAD9 EIF3E  
USP46 WDR20  
DAND5 NKX3-1

RBPJ SNW1  
GDF9 PRKRA  
MYO1F EWSR1  
ITGA6 PDIA3  
ATXN1 TBC1D5  
NFKBIB CCDC28A  
UBE2W MARCH5  
LRPPRC YWHAZ  
SGTB EFEMP2  
EGFR MAST1  
WDYHV1 RBBP8  
PRKCI FRS2  
PML EP300  
ZNF165 ZSCAN30  
RIPK1 USP21  
BCL2L1 BCL2  
MOBK3 SCM1  
HSPA4 AIMP2  
CYTH2 IPCEF1  
ERCC2 HERC5  
CCDC155 CCDC87  
TP53BP1 IFI16  
YWHAG ARHGEF7  
MYBL2 CCNE1  
TAF9 TAF6L  
CAPN1 CTSC  
ITGA1 TLN1  
KBTBD10 RPS27A  
CNTFR CRK  
NR3C1 SET  
USP8 SLBP  
MAF FOS  
YWHAB SSH1  
KRT33A DNPEP  
TUBG2 RNF19A  
CHMP2A VPS4A  
GANABPRKAG2  
USP4 DCP1A  
LDB2 RASIP1  
RAD17 RFC3

RAD17 RFC5  
OGN CRK  
NBEA DTNBP1  
AXIN1 TSC2  
TAPBP SEC14L3  
EPRS AIMP2  
BCLAF1 LEMD3  
EDNRB ADRBK1  
ROCK1 CRMP1  
MYC IGF2  
SH2D1A ARHGEF6  
TGFB1 MYO3A  
STK25 PDCD10  
MAP4K4 SLC9A1  
RMND5B EWSR1  
PHF2 TP53  
ERBB2 BLK  
CHD3 IVNS1ABP  
CUX1 GOLGA5  
SHANK2 MYO5A  
LAMA4UBR1  
YWHAG GTPBP4  
MDM4 YWHAG  
COPS6 COPS8  
MSH2 PRKCZ  
PEX10 PEX19  
COL3A1 DDR2  
DAND5 PPP1R13L  
SRSF3 PCBP2  
NOTCH1 SNW1  
TP63 IGF2BP1  
FYN CDC27  
TSC22D4 SACS  
CHRM4EEF1A2  
YWHAG GIT2  
CASP4 LSM10  
ZNF408 UPF2  
L1CAM CSNK2A1  
THRB CNOT1  
SOCS1 TUBA3C

HTT UBE2K  
SRSF3 PCBP1  
SKP1 FBXO18  
PTPN13 ARHGAP29  
AP3D1 SLC30A3  
G3BP1 YTHDF1  
HLA-DRA CD63  
CUL1 RPRM  
PRKCB GAP43  
YWHAQ EMD  
MAP2K7 CNKSR1  
CTGF ERBB4  
SUMO2 PHF5A  
MYH10 LLGL1  
USP11 SSX2IP  
HNRNPD TNPO1  
STK16 NAGK  
PRKAR2B AKAP9  
LRP1 MAPK8IP2  
RAD23A PSMD4  
CDC42EP4 POLR3H  
RELA DDX1  
FBL MCRS1  
ICAM1 MSN  
PTPRC PTPRCAP  
TNNI1 ACTA1  
ELAVL4 NXF1  
PRPF40A ASXL2  
RAD51 PALB2  
LYPLA1 VHL  
TRAF5 TDP2  
PAFAH1B3 IGSF21  
VIM CRCT1  
TGFB1I1 SLC6A3  
CAT APP  
FES PLXNA1  
ABL1 ERBB4  
OXSR1 SLC12A2  
PPP5C MAP3K5  
TRAF4 TRAF6

UBE2D3 ZNRF4  
TBXA2R GRK5  
SLC12A2 MAPK14  
CRK ARHGAP32  
TRIM28 SERTAD1  
PDGFRB PDAP1  
CDC42 MUC12  
BIRC5 CASP3  
MAPK12 DLG3  
MPO ALOX5AP  
GJA1 GRB2  
PHB2 TRAF6  
MAP3K1 BCL7B  
AKT1 SMAD3  
VAMP4 CSNK2A1  
ELANE F5  
TKT FTSJ1  
POLR2B MAGI2  
ABL1 CD19  
PRKACA RHOA  
HSPA2 PARP2  
BIN1 ITGA6  
TP53 ERH  
SREBF1 MED23  
GRAP2 KRTAP4-12  
MNAT1 COPS6  
COL1A2 LUM  
GOT2 HLA-B  
PSMC4 ATG4C  
TAF1D RRP15  
SMTN WNK1  
CPB1 YWHAG  
MAP2K5 KIDINS220  
LRP2 SCN3A  
CDK1 ECT2  
ARF6 HEATR2  
HSP90AA1 TUBA1A  
CXCR3 CXCL9  
DPP4 FAP  
RNF14 UBE2D4

SMAD4 LEF1  
EGFR NEDD8  
MCM3AP RAC1  
GNB5 NR6A1  
CUL4A DCAF17  
EIF1B PSMD6  
CDC25C PLK3  
ARRB2 TCOF1  
PTP4A3 IPO4  
CTNNB1 EZH2  
NFKB1 DST  
PHB2 USP15  
FYN TUBA4A  
ATXN1 SYBU  
CD74 CD44  
PPP1CASPRE1  
UBA1 BARD1  
ESR1 XRCC5  
TRIM15EHMT1  
PRMT2 NCOA6  
CAPZA1 CNOT8  
ASAHI TSC22D1  
RAC1 PTPLAD1  
EPB41L3 IGSF21  
RB1 CBX5  
EIF4B KBTBD7  
SUMO2 TRIM63  
CBR1 TRAF6  
BCAR3 TPM3  
MEF2D HDAC5  
CAV3 PRKCDBP  
IL1R1 IL1RAP  
PPP1CBPPP1R9B  
ACTA1 PAK1  
RUNX1T1 PCBD2  
CREB1 ATF1  
RB1 TGM2  
ABHD16A MT-ND4  
HOXB6 CSNK2B  
TP53 BCL2

PAFAH1B1 PAFAH1B2  
CEBPE KDM2B  
SRP14 DDX56  
CBX5 DSN1  
KANK1 BAIAP2  
PAFAH1B1 CSNK2A1  
MX1 SP100  
EGFR UBE2V2  
PHB2 RAPGEF2  
RB1 MAPK9  
GRINL1A HIGD1B  
CREB1 ATF6  
KNG1 KRT1  
CA2 ANKZF1  
EZR SLC9A3R2  
PHF2 EZH2  
MAP3K3 CPVL  
TNFSF4TRAF2  
ACTN4 USP6NL  
CCNE1 SMARCD3  
CRK PCDHA6  
PINX1 MRPS16  
MERTKGAS6  
CDK2 RBL1  
FYN CD19  
SLC9A3R1 RLBP1  
FYN ABL2  
TGFB1 SMAD1  
TGFB1 SMAD2  
FYN TXK  
ANP32A TAF1A  
GRB2 MOBKL2A  
PRKACA ACCN2  
EIF3F PRRC2B  
IRS4 YWHAG  
PTP4A3 ATP2A2  
NT5C2 MOBKL2B  
PSMD10 PSMD7  
ABLIM1 SREBF2  
ENOX1 ENOX2

DTNB CCDC85B  
STAT3 STAT2  
NR5A2 EDF1  
TXN PINX1  
SNW1 SRRM1  
TMEM33 BRF2  
MMP14 SPOCK3  
CDC42 CDC42EP3  
HADHA MAP1LC3B  
CDKN2A HAUS1  
GJA1 TJP1  
UBE2L3 RBCK1  
TDRD7 CABLES1  
FTSJ1 STOML2  
EIF1B EIF4H  
LMNA MRPS26  
ID1 IKBKG  
F2 F2RL1  
ABI1 NCKAP1  
SSTR2 SST  
HIST1H1C CENPA  
GRB2 MERTK  
GSK3A SGK3  
UBE2D2 TRIM35  
PHOX2A HAND2  
SLMAP FAM40A  
UBE2D2 PDZRN3  
SMARCC1 WWOX  
HGS EHMT2  
RAB3C RPH3AL  
RPN1 ERBB3  
SRF PML  
TOPBP1 POLE  
ETF1 TRAF6  
THRB PSMC3IP  
S100A8 KLC2  
SS18L1 USP30  
UBE2K TRIM39  
GLRX3 FRA10AC1  
PRDX1 RIPK3



LAMB2 ZNF512B  
CBX4 PHC1  
ESR1 ING1  
PTK2 CIB1  
STAT5A CENPJ  
CHRM2 SAG  
MXD1 MLX  
SEPHS1 IGSF21  
PTPN6 TREML1  
GNAS RUVBL1  
ATXN1 UNK  
UBC GATA1  
INO80E RUVBL2  
PRPF6 SF3A2  
PAK3 PXN  
SCAMP5 SLC9A7  
CRYAB CRYBA1  
RHOA ARHGDIG  
ATXN1 ATP6V0D1  
NCOA1 CARM1  
DNM2 PEF1  
GOT2 HLA-C  
PIIB IRF3  
SREBF2 TTC1  
BLM SUMO2  
CCND1 BRCA1  
MCM7 CDC6  
SH2D1A CD84  
ATG13 GABARAPL2  
HR CYP27B1  
DEC1 CHD3  
USP22 TAF9  
AR UXT  
EIF3F CFLAR  
EWSR1 MRPS18B  
USP11 FARSA  
SFN DCAF7  
ABLIM1 GOLGA2  
DES PKD1  
MAPK1 PLCB1

GPR25 MAP3K7  
PRKCE AKAP9  
HGS MARK4  
EXOSC9 SLC7A9  
AKAP17A NINL  
BMX RAP1A  
CEBPB HNRNPK  
S100A11 TRAF6  
TRA2B IVNS1ABP  
ITGB4 DST  
RAP1GDS1 KIFAP3  
MYC GEMIN4  
RBL2 SNW1  
DDX5 NDRG1  
RBL2 DGKZ  
ELANE LRP1  
TRAF2 UBE2Z  
TOB1 TARDBP  
CD81 ZBTB16  
PLEKHA5 CCDC88B  
FOXM1 CREBBP  
DNM1L SCG3  
RIPK2 CALM2  
MOBKL1B LATS2  
GADD45B MAP3K5  
XPO5 NEK6  
KPNA3 MDM4  
SMURF1 DUSP13  
EXOSC9 EXOSC2  
ATXN1 CCDC136  
E2F3 MGA  
GRIN2D PRKCE  
SRRM2 RUVBL2  
RPL5 WNK1  
SFN YWHAG  
UBE2M RNF111  
UBTF SIRT7  
GAP43 RABEP1  
MTHFSD TP63  
ATF1 GABPA

STRN WNK1  
DLG4 LRRC7  
DDB1 DCAF11  
CDC42 FBXO9  
ATF1 GABPB2  
GBF1 COPG  
ARCN1 KEAP1  
PLCG1 EEF1A1  
TRAF2 NT5DC2  
PRKCE GNA13  
SREBF2ZDHHC17  
SGK1 CARHSP1  
RAB11FIP2 MYO5B  
COPS2 RFWD2  
TRIM46TSG101  
ARID1A ITCH  
EIF1B YARS  
ATF1 CAMK2A  
TCF3 FERD3L  
ENSA PSEN1  
CTTN MYLK  
SF1 NCOR2  
NDEL1 PLCB1  
EEF1D NOM1  
CUL4A DDB2  
VAMP3 PINX1  
CAMK2N2 CAMK2A  
CEBPB MAPK1  
ESR1 TAF10  
ITGA6 GIPC1  
GFI1B CCDC136  
SSB VHL  
SRF GATA4  
ZNF646 TRAF2  
PCP2 TWSG1  
PEBP1 PRKCZ  
YWHAQ YAP1  
GRM6 GNAO1  
IL2RG IL15RA  
RAC1 PAK1

VHL VBP1  
AIRE MCM6  
ERBB2 SLA2  
ACTN4 STAT1  
BCL3 N4BP2  
BDKRB1 GNAQ  
EFNA2 EPHA4  
PRKCB SYT6  
IKBKE TSNAX  
NR2F6 BAZ2B  
ASS1 ELN  
SBF1 MLL  
UBE2D2 TRIM26  
MAML1 CREBBP  
EFNA2 EPHA5  
GRID2 PTPN4  
MDFI SFI1  
PSMD11 CCDC90B  
DYRK2 RAD54B  
EPHB2 NUP153  
RPS11 FTSJ1  
MARK3 RPS27A  
EIF4A2 PDCD4  
XPC DDB2  
SNRNP200 TCEA1  
HNRNPD EXOSC4  
KHDRBS3 KHDRBS1  
PLK1 BIRC6  
HMGA1 CSNK2A2  
ARHGEF15 MOBKL3  
FANCA APITD1  
CHD4 NAB2  
RB1 PRKCZ  
GNB2 IKBKE  
RAC1 PAK2  
CHRM3 GNAQ  
ARID1A HIC1  
BAG1 STUB1  
CASP6 PSME3  
SMAD4 TH1L

XRCC6 XRCC6BP1  
OFD1 UBE2I  
IMPDH2 HLA-C  
PRKRIR TP53  
RB1 ZBTB16  
HSP90AB1 MEPCE  
GYPC PDIA3  
MLL ASH2L  
HOXB9 PHTF1  
RBPJ FHL1  
ABCF3 SRRM2  
PSMD12 PAAF1  
POLB PNKP  
AR RNF14  
BAG2 TRAF1  
NPM1 HABP4  
DUT PINX1  
KDM5B SLC39A6  
TP53 S100A4  
VAV1 MAPK1  
TAL1 NCAPG2  
H2AFX RNF168  
PHLDA1 MDFI  
TAB1 TAB2  
MYB HIPK2  
CDC20 CCDC59  
EPB41 YWHAG  
ZFP64 MAFB  
RAP1A C1QBP  
VIM TUBGCP4  
KIF1B BRCA1  
KRT36 OTUD4  
HSPA9 TBPL1  
ERBB2 JUP  
YWHAG DYNC1H1  
WISP1 DCN  
TSN TSNAX  
MARK3 RPS27A  
HMGA1RXRA  
HSP90AA1 RPS3

MCF2 TNK2  
KDM1AAR  
MYC FOSL2  
WASL HSP90AA1  
HSPD1 HIST2H2BE  
GABARAPL2 ANKFY1  
SUMO1 DAXX  
HLA-C PIN1  
ATXN1 ZC3H10  
PFAS MCC  
DLST NDRG1  
LRP4 SUMO1  
SQSTM1 C14ORF139  
CSNK1A1 ETF1  
GLRX3 HEXDC  
SEPT8 CDK14  
PTPN12 GRIN2B  
SIRT1 AKIP1  
KCNA2 ETV1  
HIST1H3J ASF1B  
TSC22D1 MFN1  
CHRM2 GPRASP1  
FOXO1 FHL2  
PRKAR1A CDK2  
NPC1 VPS4A  
LYN SYK  
CDK4 VTA1  
RPS27A MDM2  
SELE PTPN11  
RLIM UBE2D4  
APITD1 RMI1  
UBE2D1 ZNRF1  
SRSF3 SF3A2  
KCNJ6 DLG1  
NFX1 MAML3  
YWHAE KCNK9  
PRSS23 ACTG1  
RB1 LIN9  
TBP TAF10  
GAPDH SET

DNMT1 DMAP1  
PRMT5 CTNBL1  
HIST1H3J EGLN1  
PRKCB ZMYND8  
HIST1H4I PRMT6  
ENPP3 GRB2  
CCNB1 MEF2C  
MPP5 PARD6A  
RAD52 MCM2  
RARA LIMD1  
GRM5 PRKCE  
CUTC SLC27A6  
GAPDH PTK2  
RPS27ARRM2B  
PDPK1 SGK3  
TBP FOXF2  
YWHAE HSF1  
PDCD6 SEC31A  
BRCA1 RAD51  
GLRA2 BAG6  
PSMD12 PSMD7  
STX4 TXLNG  
SSR1 NUP54  
RBL2 HDAC1  
FLNA KCNJ2  
DNAJA1 MAP3K3  
EML1 GRID2  
MSX2 PPARG  
MCM3 TRAF6  
PPFIBP2 TSG101  
CHGB MARK3  
MCM3 NFKBIA  
PTN NAP1L5  
EIF3F EIF3D  
YWHAZ KLC1  
EIF3F EIF3H  
TRAPPC3 TRAPPC10  
NTRK1 DYNLL1  
CD46 CD82  
TSC22D1 GCN1L1

PTP4A3 XPO5  
RAC1 BANK1  
TSC22D3 HPCAL4  
BMI1 CUL3  
SEPT6 SEPT12  
TRIP6 PPP1R16A  
PLCG1 FLNC  
PIK3C2A TKT  
MYO6 IKBKG  
RELA HSPH1  
GRIN2B GRIN3A  
INSIG1 VAPA  
EGFR STAT3  
DPYSL3 DISC1  
APP TP53BP2  
RRAS GRB2  
RCVRN GRK1  
COLEC11 SRSF1  
HDAC1 SAP30L  
NDUFAF2 OPTN  
PARK2 PINK1  
KIAA0776 PHLDA3  
CUL4A FBXW5  
NAA38 PGD  
CDH1 LIMA1  
PHC2 MCERS1  
RAD1 PARK2  
ATP5C1CCND3  
ACTN2 TTN  
IRS1 PHIP  
DLG4 ERBB2IP  
DNM1L SH3GL1  
TRIP13 ASB13  
CDK1 TLE1  
PRKCB CARD11  
DES AURKB  
SDC2 TRAPPC4  
HDDC3 NMI  
HAP1 TOMM20  
SIAH2 DCC



DZIP3 UBE2D4  
COIL TGS1  
MAT2A ARF6  
SNAP25KCNB1  
CRK DKKL1  
GABPA MED1  
ESR1 CDKN1A  
YWHAE CDK16  
ANXA5 FDFT1  
HAP1 ING5  
NR1I2 RXRA  
CHAF1B HIST3H3  
SMAD9 BAZ1A  
MICALL1 PACSIN2  
TRIO EXOC1  
FLNB RAC1  
DEC1 STAT3  
VHL COTL1  
PTN BTBD2  
PRKCD USF2  
WASL PFN1  
CSN1S1 CPSF1  
PTP4A3 SMAP1  
MAX CUX1  
GABARAPL2 NCOA7  
USP8 NBR1  
CDC42 GOPC  
UBE2D3 UFM1  
SMAD6 WWP1  
NR2C2 TAB2  
ZRANB2 ARRB1  
LIN7A DLG3  
UBE2D3 RNF43  
SLC9A3R1 SLC26A3  
SLPI ELANE  
JAK2 CSF3R  
AKR1C3 ZHX1  
MAPK3 PRKCE  
PMS1 SBF2  
MYO1B BRF2

PIGR RAB3B  
RCC1 RANBP3  
TSC2 FOXO1  
STX4 SCRIB  
PRKCB GSK3B  
UBE2D2 TRIM8  
FSTL3 INHBA  
ANAPC4 ANAPC2  
PRKCB GSK3A  
PRKACA HAND2  
FGFR3 EPHA4  
MPP6 SNX9  
CSRP3 NHLH1  
IKBKE VMA21  
RPS6KA4 MAPK3  
KRT31 TWF2  
CBX4 CTBP1  
MYC UTP15  
RIPK2 ATP5D  
TRIM26 SRRM2  
WASL VASP  
MAPK8 BCL2L1  
ZAP70 SH3BP2  
MEIS1 HOXB8  
MLL RNF2  
MAX MXD1  
TUBB TTBK1  
TP53 PHB  
TMEM33 PHLDA3  
XRCC5 PDX1  
TBPL1 C2ORF18  
APPL1 RAB21  
APPL1 RAB22A  
CTNNB1 DLG5  
NPM1 CDT1  
PGD USPL1  
PARP1 SMARCA1  
EMD SMARCC2  
S100P CACYBP  
CDK2 UBE2A

MBL2 MAD2L1  
BUB1 CDK1  
TCERG1 RNASEH2A  
SUMO1 KCNC3  
MSX1 RGS7  
HSPA1B PAX8  
BZW1 CMYA5  
FYN CASP3  
PTK2 ATXN2  
NPEPPSOTUD4  
PPP1R12A PPP1CB  
CSDE1 CDC42  
MGEA5 SIN3A  
HERPUD1 UBQLN1  
CD46 CD81  
GOLGA3 GOPC  
EIF3F EIF4G1  
PSMA5 PLK1  
ETS1 RBBP6  
E2F4 ARID3A  
PRKCZ AFAP1  
FKBP5 USP49  
HSPA1B MME  
CHEK1 RELA  
GABARAPL2 PSMD1  
DLG1 PBK  
FUS USF2  
YWHAE RASAL3  
OS9 TRPV1  
FYN EPS15  
MYBL2 CDK2  
ARID4B SIN3A  
ILK MTHFD1L  
APP ACHE  
RAD21 SMARCA5  
CDK6 FBXO7  
RPN1 KIAA0087  
CREBBP CARM1  
MAVS ATG5  
CRKL MSL1

NR0B2 DDX20  
CSTF1 USP15  
MAPT ARHGEF40  
CTNNB1 BRIX1  
ASIP F11R  
RPL22 MAPK14  
MAFG VIM  
NGFR NGFRAP1  
MAGEA11 WTAP  
PIAS2 NR3C1  
MON1AVPS33A  
DBT USP16  
ISG15 ENO1  
FAM107A TXN  
SREBF1MED13  
EPB41 PAICS  
ACTN1 RAVR1  
JAK1 GNB2L1  
LMNA SRRM2  
ANXA2 PLA1A  
PRPF40A UBE2I  
FNIP1 PRKAB1  
LRP1 PDIA2  
PRDX3 SUMO4  
ADCYAP1 SHH  
GNG2 GNB1  
APIG1 SYP  
BMP2 BMPER  
SHC1 DAG1  
PIK3R1 EPHA2  
CRK DDX41  
PRMT5 SKI  
YWHAG SUV420H1  
ACTA1 MAP1A  
YWHAE GOLGB1  
HSPA1B YWHAZ  
EZR MAPK8  
APC CSNK1A1  
VIM FABP4  
CCNK EFEMP2

YWHAQ CDKN1B  
RPS15A GRB2  
ALDOA TUBB  
TGFB1I1 CSK  
AKT1 RICTOR  
SRF MYOCD  
RPF1 RPAP3  
HPCAL1 HMG20A  
MEIS1 HOXB13  
TRAF2 TRPC4AP  
RPS27A UBQLN1  
SMAD9 UBQLN4  
SMARCC1 SMARCD1  
SOD2 FAM192A  
IRF6 RFX3  
CD55 GPLD1  
LYPLA2 SCMH1  
PRKCZ DNAJC14  
STAT5A JAK3  
RPS27A USP18  
LYN TRAT1  
FGB SERPINA5  
RIPK2 TLR2  
EGFR TLN1  
PAICS MOBKL3  
AKT1 USP8  
LMAN1 MCFD2  
RNF43 KDM5B  
SLMAP ZRANB1  
PSMB4 OAZ1  
GOSR2 USO1  
SNW1 PCBD2  
POU2F1 PKNOX1  
PHKG1 CTRC  
DAND5 KLF6  
SF3A1 USP30  
GTF2E2 EXOC4  
PTPRB GRIN2B  
TGFB1 DCN  
PITPNM1 RHOA

UBE2U ZSWIM2  
DAP3 HIF1A  
RNF123 MAP1LC3C  
FXR2 GKAP1  
EXOSC10 HIATL1  
ESR1 CHD3  
OTUD4 RPTN  
WWP2 EWSR1  
CDKN1A PSME3  
NCK1 GAD1  
VASP DMRTB1  
ANKRD28 NCL  
HUWE1 VCPIP1  
HLA-DQA1 SH3GL2  
CD4 CD81  
EZR WWOX  
AIP PTGES3  
SNRPB2 MCC  
FGR PLAUR  
PAK2 CTTN  
NR3C1 SSB  
INSL6 DDIT4  
SRC KHDRBS1  
MRE11A DDX1  
MDM4 YWHAH  
HDAC3 BAG1  
ZAP70 FCRL3  
BECN1 UVRAG  
GNAI3 PTPRU  
PCYT1A MAPK6  
EP300 JDP2  
FASLG NCKIPSD  
CDK8 SMARCA2  
JAK2 JAK3  
TANK IRF7  
CSE1L TMEM62  
PRKCI CDC42  
CDH2 CTNND2  
MYC IPO4  
ACTR3 TRAF6

PPFIA1 ERC1  
DBT TNFRSF1B  
CCDC91 EWSR1  
CUL2 ZYG11B  
HAT1 ASF1B  
EGF FNBP1  
VAMP1 VAPA  
EZR CLIC5  
SENP8 AKIP1  
INCENP AURKC  
DTX1 DTX3  
GTF2B NOLC1  
HCK FASLG  
SHC1 SOS1  
SNX4 INSR  
NUCB1 GNAS  
PRKCH RPL27A  
HLA-B RAB14  
CAPN2 CASP9  
TAF9 SUGP1  
PDGFRB PTK2  
DAND5 RBL1  
TUBB MARK4  
AP3D1 MYC  
UBE2K DSTYK  
MAPK8 PRKD1  
SHC1 SOS2  
XPO5 PHLDA3  
UBE2D1 MIB1  
PAK4 DLST  
UNC45A PHLDA3  
FLT1 PTK2B  
ESR1 POU4F2  
FYN VAV1  
CSNK2A1 CAV1  
SMAD9 METAP1  
ABL1 VPS13A  
EP300 ING5  
CDC42 ARHGAP26  
CASP4 CASP10

HMGA1NFKB1  
BMPR1B ARHGEF6  
EFEMP2 RHPN1  
PRDX3 MAGEA11  
APC IMMT  
FCGR2B BLK  
DCC RPL5  
SKP2 MYC  
DCC RPL28  
ZNF770 USP20  
HADHA RIPK3  
PEBP1 PRKCD  
SEC22BSTX18  
SDCBP NFASC  
MYH8 CDK2  
CNOT3 ID3  
CASP3 MEF2A  
TLE4 HDAC1  
PRKCG AFAP1  
GNB3 GNG13  
RAD17 MCM7  
RAC1 TIAM1  
RRAS MLLT4  
IPO8 EIF2C4  
RB1 TRAP1  
MPZL1 PTPN11  
MAPK1 LRPAP1  
NDUFS2 NDUFS3  
FASLG ITSN2  
C1QA DCN  
BRCA1 E2F1  
NAE1 UBA3  
SOD2 WBP5  
PSMA3 TNFRSF14  
TGFB1 NUP37  
PPOX HAP1  
HLA-A DERL1  
SAP18 GLI3  
PARK2 STUB1  
HAP1 GIT1



EPB41 DHX9  
TP53 THRB  
MLH1 ATM  
TEC PIK3R3  
LDOC1 PLEKHF2  
MCC VHL  
ESR1 AKAP13  
LMNA STAC  
TGFBR1 EIF2AK4  
DDB1 COPS6  
IKBKB PRKDC  
CDC42 DOCK9  
BIN1 AP2A2  
NCBP2 EIF4G1  
MAP3K7 TAB1  
SYNJ1 PACSIN2  
SYNCRIP PTPN11  
DEPDC1B SUPT16H  
PTPN6 CD300LF  
NMI STAT4  
GYG1 TRIM7  
TP53 RFC1  
MAP3K3 UACA  
IL6 ZBTB16  
SEPT6 SEPT1  
LYN CD72  
RGS12 MAP2K2  
EPB42 ANK2  
LCP1 AIF1  
HIST1H1C AEBP2  
PIN1 DDB1  
KIF2A KLC1  
PRPF4 SNRNP40  
VAV1 ABI1  
UBE2L3 UBE3A  
LAPTM5 DCUN1D1  
PAXIP1 ECSIT  
MOCS2 ABCF3  
SNAP29NSF  
CHD4 SRRM1

MX1 ACTB  
CDC23 ANAPC4  
VAMP3 VAMP8  
MLC1 DAPK2  
BUB3 USP7  
AKAP3 ROPN1  
CAPN1 CBL  
NUDT21 PAPOLA  
LCK PAG1  
CD2BP2 SNRPB  
FBL CD40  
DNM1 CTTN  
RASSF2RASSF1  
MAP3K3 MYLK2  
KDM5CRING1  
FCN1 TGFB1  
KRT15 ZNF638  
TAF11 TAF7  
BIN1 ITGA1  
SOCS3 PPP3CB  
RPL35AMPG  
TP53 SMAD3  
PIAS2 MSX2  
E2F2 SETD8  
RIPK2 RPS14  
TRIM29LZTS2  
MAPK13 RANBP9  
HOXA3 ALX4  
CASP7 PRKCZ  
HLA-B PTGES3  
UBC NEDD8  
HLA-DRA CD82  
GAS7 FMNL1  
DLGAP3 ABL1  
GNB5 GNG4  
SMARCB1 BAZ1B  
UBE2D3 RNF4  
APOH TP53  
DDB1 DET1  
ETS1 SPI1

ATP2B4TSC2  
HSPD1 MAPK6  
HIF1A SEPT9  
MAGEB2 RPL36  
TLR3 NDUFA2  
CFLAR DEDD2  
CDC42 PARD6B  
CDC42 PARD6G  
RAD52 ERCC4  
ORM1 ALB  
YWHAB LSR  
ORC4 CCL2  
YWHAB RALGPS2  
ALB KLK3  
CENPA RNF2  
GSN AR  
SH2B2 SHC1  
PHF2 DHX9  
NFKB1 PAK2  
NCK2 SF3B4  
DARS PIK3R1  
HLA-B ACTR1A  
HLA-B ACTR2  
TRAPPC2 ENO1  
RACGAP1 CELSR3  
PFKL DMWD  
CAMTA2 HDAC5  
CD4 IL16  
PLK1 MYT1  
HIF1A NAA11  
CLN3 SLC25A22  
RAP2A TGFBR1  
PIN1 MAP3K11  
A2M FARSA  
ABI3 WASF2  
PIAS1 WNK1  
CNOT3 CNOT1  
NFKB1 MAP2K5  
FASN MAP3K1  
SERPINE2 COL4A4

SYP GRB2  
AXIN1 ARRB1  
C3 CD46  
SIAH2 POU2AF1  
ZWINT BECN1  
CREB1 EP300  
MSX1 AES  
PLAU SERPINE2  
GRB2 ITK  
ANXA13 RPF1  
MPHOSPH6 DYNLRB1  
MCC DUSP3  
SCNN1G STX1A  
PDE6D ARL15  
HSP90AA1 CRNKL1  
SMURF1 ING1  
TNFAIP1 KCTD13  
PRKCB RBCK1  
GH1 NUDT5  
TPT1 EEF1A1  
GDF9 FXVD6  
SIAH2 PIAS3  
PRPF40A NCKAP1L  
FBP1 LNX1  
PAX6 SOX3  
CALR MTNR1A  
PRKG2 MYLK  
STAT5A BTK  
NDUFS5 NR4A2  
TUBB TGM2  
HADHA TRAF6  
ATXN1 MYST3  
DOM3Z EXOSC4  
HNRNPR FARSA  
MSH3 XPA  
VIM HABP4  
FOS COPS5  
ATN1 KRT31  
GNB5 FBXL15  
FAS MAPK8

SP2 NKX3-1  
NCDN GSTK1  
APP PIN1  
IKBKE SLK  
U2AF1 MEPCE  
RAF1 YWHAH  
S100B S100A1  
DEC1 MDM2  
NRAS ACVR1  
PSEN2 KCNIP4  
MYC CHD5  
HSPD1 BAK1  
RPF1 DAZAP2  
PHB2 ATXN10  
GNAI3 RGS18  
MYL6B RIPK3  
HRAS TTC1  
TRAF2 RB1CC1  
FBXL18KRTAP4-12  
UBE2D2 RPS27A  
MYB CLTC  
MECP2 HDAC1  
SMURF1 ANAPC5  
DMC1 RAD54B  
LONP1 RNF32  
MAPT ACTB  
EXOC6 ECSIT  
UQCRC2 RTN4  
DLGAP3 CRK  
GIPC1 TYRP1  
CUL2 RNF7  
ATIC VHL  
PJA2 USP46  
CDC7 ORC1  
SUPT5H MED31  
PRKD3 VAMP2  
PAX9 ZNF580  
CDH1 VCL  
GNRH1 MEP1A  
PRRC2A DDX20

NCAPD2        NEK6  
AURKAMYCN  
EGFR    USP8  
HLA-B    PCBP1  
POLR2H        RUVBL2  
DLG1    DLG3  
STX1A    VPS11  
KRT4    P2RY12  
BCR    TJP2  
DDB1    BRAP  
IRS1    NISCH  
NUMA1GPSM2  
EPB41    SMAD3  
YWHAE        KIAA0232  
TEC    PTPN18  
BTK    TLR8  
MCM3AP        MCM3  
HNRNPC        ZNF581  
SERPINB9        EEF1A1  
PCGF2    UBE2U  
FRS3    MAPK1  
CPSF7    PRMT2  
LSM3    MEPCE  
ATP5J2    TRAF6  
ABL1    GNS  
CDC27    CASP3  
YWHAE        GTF2B  
ATXN1    LRSAM1  
RALA    ARF6  
PPP1R15A        LYN  
CDC23    ANAPC10  
RING1    FHL1  
SLC11A2        NEDD4L  
AURKASOD2  
HNRNPC        RALYL  
FAS    PTPN6  
KLHL13        USP25  
RPAP2    RPAP3  
GJB1    CAV1  
ALDH18A1        ZRANB1

PIK3CDKITLG  
GCN1L1 CDC5L  
HTR2A DLG4  
IGF1 IGFBP4  
REN CTSB  
BMP6 BMPR1A  
AGTR1 ARRB1  
SRRM2 MRPS23  
EXOSC4 EXOSC3  
NFKBIB POLR1B  
RAC1 RCC2  
VIM HAP1  
GSTP1 PTN  
PPARG NR0B1  
VIM ATN1  
FYN FOXF2  
SCGB3A1 MARCO  
SHBG MXD4  
NXF3 NXT1  
DOM3Z UPF1  
GRIN2D MAP2K2  
TNKS NUMA1  
CHRNA1 CHRND  
YWHAQ LUC7L2  
TGDS NCK1  
COL1A1 PKD1  
SRRM2 PPIL1  
SART1 SF3A2  
CYB5B TRAF6  
KIF1C YWHAG  
COPS6 MYCBP  
VCP HERPUD1  
HMGA2SMAD3  
SRF CAMK2A  
KIRREL3 NPHS2  
TOB1 SMAD4  
MAML1 MAML3  
KIT CSF2RB  
DAND5 PFDN5  
ACOX3 SMURF2

CA12 CUX1  
WDR89 POLR3F  
POLR1A POLR2H  
RADIL SMYD2  
BCL2L1BAK1  
SERPINA3 DNAJC1  
ACVR2A SYNJ2BP  
UBR5 UBE2E2  
SNRNP200 PIN1  
RBPMS LZTS2  
NCK2 NCKIPSD  
WDR48 ATAD5  
ABL1 PRKD1  
DYNC1H1 DYNLT3  
FN1 COL1A2  
MAP1B DYNLL1  
DNTT CUL3  
KRAS RAP1GDS1  
NPPA EPB41  
MED6 MED10  
PPP5C CPNE1  
CCNA1 RBL2  
FDPS ATXN1  
OXT TXNDC17  
CRK PNMA2  
ACTR1A DCTN1  
GFI1B PDLIM5  
HCFC1 PDCD2  
IGHG1 CD40LG  
POLR2C CTR9  
GZMB IGF2R  
KRT15 RIBC2  
GFAP CEP76  
AP2S1 AP2B1  
STAT5A PPP2CA  
TRAF4 SIGLEC7  
YWHAB SLC4A7  
SDC4 PRKCD  
RANBP2 LSM14A  
NEK8 BICD2



SPA17 ROPN1  
GABARAPL2 KBTBD6  
AKT2 AKT1S1  
VHL ICT1  
CBX6 RNF2  
SMARCC2 TOPORS  
RAD23A EP300  
PPP1CAZFYVE16  
GBAS NAMPT  
CDH1 MAD2L2  
CCNT2 PKN1  
RBBP7 DPEP2  
TAL1 RPS27A  
BCL2 BCL2L14  
MEF2D CCDC78  
KAT5 PITX2  
RAC1 PAK7  
VIL1 ACTG1  
SMAD9 MAN1C1  
CTCF CHD7  
GADD45G CDAN1  
RPS27AAKAP8L  
MYC CSNK2A1  
BMPR1B TNNT1  
ZNF24 ZNF638  
CSF1 SLA2  
EPHB6 MLLT4  
CRK CNTNAP1  
SIRT1 ATG5  
PTN KPNB1  
TACR3 TAC3  
SUMO2 EXOSC9  
CUL3 KBTBD7  
PFN2 VHL  
TCEA1 DDX46  
ITGA1 AUP1  
SNAP23STX5  
CAV1 MYRIP  
UBE2I TRIM55  
ACTN1 WNK1

APP NAE1  
HGS STAT1  
UBE2I TRIM54  
STAT5A PTPN11  
CRK RPP38  
SAP18 DDX19B  
AP2M1 MEGF10  
STK16 ADAMTSL4  
SRSF1 RRP1  
TSC2 SMAD3  
PRKAR1A STXBPI  
CDH2 ACTA1  
SYNCRIP MEPCE  
C3ORF26 GSTK1  
SELL EMCN  
INSL6 SMPD3  
PICALM CASP8  
RBPMS ARHGAP9  
ABLIM1 TRAF2  
EIF4E2 YWHAZ  
WBP2 SEPT3  
RADIL FGFR3  
CDC25C YWHAZ  
PEX12 PEX5  
SGK1 KCNJ1  
MAP2K6 RELA  
GNAI3 LPAR1  
NMI NECAP2  
KAT5 TBX5  
BCL2L1NLRP1  
SREBF1EP300  
RXRA MED25  
CCR10 GRB2  
SHFM1 PCID2  
ACTN1 LPP  
SOX18 MEF2C  
EPB41 PCMT1  
TXNRD1 TXNDC17  
ADRB2 AKAP5  
KIF3B IFT20

MITF PATZ1  
SERPINF2 SERPINB12  
STX6 EEA1  
CRKL STAT5B  
ZNF193 GRB2  
AURKACHFR  
CBFB C12ORF11  
CD8A HLA-A  
ACTA1 USP6NL  
PLG THBS1  
ESR1 KIF1A  
RPS27ASH3KBP1  
CCDC24 DISC1  
EFS PTPN12  
KALRN PRKCB  
STAMBP CLTC  
MFSD3 MDFI  
PRKACG RYR2  
TRIP6 POM121  
USP11 GIGYF2  
RUNX2 THOC4  
STX1A SYT4  
BNIP3L EWSR1  
SSTR4 SST  
VHL RPL37A  
GNAI2 AGTR2  
RPL22 NSFL1C  
CAV1 DMBT1  
SNAP23STX3  
CUL4B COPS5  
FLNB GP1BA  
LPA FBLN5  
CDC42 UBR1  
CASP3 BID  
ZBED1 RENBP  
FOXE1 PLCB3  
FGFBP1UBQLN4  
ULK1 GABARAPL2  
EPM2A GSK3B  
YKT6 STX5

KAT5 EP400  
MAPK1 DUSP22  
CSNK2A1 CREM  
DOK1 PTPRH  
CTNNB1 PARD3  
NFKB1 SFPQ  
MLH1 SELENBP1  
WDR1 CARD11  
ARR3 ARRB1  
CNTN2 VAC14  
LRPPRC CECR2  
MYO1C MAP3K3  
ADCY7 PRKCD  
FYN GRIN2A  
MMP7 ELN  
CSN3 COPS7A  
ITGB1 VCP  
MYH9 MYBPC3  
TP53 MAD2L1BP  
CCNB1 ZC3HC1  
CBX3 TRIM28  
NIN C14ORF166  
CTSG CXCR4  
RB1 TAF1  
SMAD9 HEYL  
SAP18 SUFU  
FYN GNS  
HADHA PRKAB1  
SEC16ANFKB2  
SNW1 ASCC2  
FYN CNTN1  
TCP1 PPP4C  
ADCY5 ADCY2  
DDX11 WNK1  
RUNX3 CBF3  
PLG CXCL2  
SERPINB9 COPS6  
ESR1 MED23  
PDLIM1 AGK  
ACAN LUM

TOP1 UBE2I  
PSMC3 UCHL5  
FASLG ARHGAP9  
ZNF225 CDKN2A  
CD1A B2M  
SDCBP STX1A  
LGALS9 CTNNB1  
CD8A HLA-B  
ANXA5 EIF4G1  
KLKB1 HGF  
ORC5 ORC1  
PDGFRB PTPN12  
ORC5 ORC2  
VAV1 PLCG2  
CDK9 RPS4X  
RAF1 KRT18  
STAT3 RBM8A  
CDH5 PKP4  
NR2F1 AHR  
YWHAB PPFIBP1  
AGRP GHRL  
BCAP31 DERL1  
MED26 MED13  
TP53BP2 BECN1  
CDH5 P2RX4  
PCBD1 ATG14  
SNRPF MAP3K1  
MAPRE1 CLASP1  
NUP98 USP7  
PRKCA INADL  
TBC1D4 EP400  
CCNT1 ESR1  
AKR1C3 ACIN1  
ZNHIT3 PITX2  
CANX PMP22  
TLE1 EN1  
RIPK2 ECHS1  
APOH CDC42  
PAN2 MRPL39  
CFTR STX1A

LIMK1 BMPR2  
MSX2 MAGED1  
MAP3K8 REL  
CDC16 MAD2L1  
TROVE2 RAB11FIP5  
YLPM1 RB1CC1  
CDC27 PPP5C  
SMAP2 TP63  
USP14 PSMD2  
UBE2U PJA1  
BMPR1B BMP7  
PLCG1 SOS2  
ARL4D MAPK8IP3  
SMAP2 HLA-B  
TULP2 EWSR1  
UBC TAB1  
KRT15 FAM164C  
PLCG1 SOS1  
IFNGR2DNAJA3  
INSR GRB2  
PIM1 CDKN1A  
SKIL SPARCL1  
FOS DDX17  
PSMA7 EGFR  
PTPN12 GAB1  
USHBP1 GCC1  
ITGB1 YWHAB  
PACSIN1 PHF15  
FBXO28 TRAF2  
YWHAG RAB11FIP5  
COIL NOLC1  
LOR SPRR3  
AMBP PIK3CA  
MCC SMC3  
RAE1 PRKD2  
NR2F6 GNL3  
VAV2 SF3A3  
RAC1 KIAA1409  
BUB1B ANAPC7  
NOTCH2 CNTN1

CXCL2 CXCR2  
SKP2 CDH1  
CXCL2 CXCR1  
RPLP2 MAP3K1  
USP8 BIRC6  
RARA MBD1  
CLN3 SEC61A2  
ATP5J2 PRKAB1  
TK2 CDK1  
CCR10 CXCL12  
KRAS PIK3CG  
TUBB MAP6  
RPA2 CRMP1  
PARP9 DTX3L  
YWHAZ SOS2  
PMS1 SMC3  
HBP1 SAP30  
PLSCR1IP6K2  
RELA GCN1L1  
LDB2 LMO3  
CREBBP SMARCC2  
EPHB3 EFNB3  
WNK1 DKK3  
PPM1G USP49  
CDC42 KIAA2026  
CD2BP2 EFTUD2  
CTNND1 ACTA1  
KCNJ12DTNA  
YWHAZ RICTOR  
NCK2 ERBB4  
TNFRSF1B RPL23  
FBP1 FXR2  
ATXN1 KIAA0913  
ESR1 FOXO1  
PDCD1 CD274  
APC RANBP9  
APC ERBB2IP  
MTA2 YY1  
UBC ELAVL1  
SLC25A12 C20ORF24

HRAS RIT2  
HDAC4 LZTR1  
TRAP1 SMAD4  
PIN1 FTSJ1  
AIRE NCK1  
CEBPB RUNX1  
ZNF200 PPARGC1B  
HPN HGF  
RPS19 SRRM2  
SETDB1 NIPSNAP3A  
FLNA TTN  
PRPF40A PIAS4  
PPP2CBRELA  
GNAI2 ADCY1  
TARBP2 HDHD2  
SPTAN1 PLEC  
ATF3 ZNF182  
ILF3 XPO5  
CASP10DEDD2  
AARS2 MEGF10  
HMGCL MS4A7  
S100P S100A1  
TSC22D1 TBRG4  
PIK3R1 FLT3  
SYTL3 NRXN1  
CCNA2 CDC20  
HLA-B PSME3  
ISG15 ERCC2  
AP1G1 RAB14  
SQSTM1 MUTED  
FUNDC2 ASCC2  
ZNRF2 UBE2D4  
HOXA10 FOXO1  
TCF3 MAPKAPK2  
CUL5 DCUN1D1  
CASP4 NOD2  
ERBB3 ERBB4  
HSP90AA1 SIM1  
CDC42 MYO6  
YWHAE DISC1



CHEK1 PCNA  
PIK3R1 TGFBR1  
ARHGAP15 SMURF1  
PPP1R15A ZNF512B  
CSF2 CSF2RA  
ESR1 PTPN6  
SPOP HCST  
SNX2 ACVR2B  
ESR1 SHC1  
AZU1 CLEC4G  
SYP STX1A  
TPT1 TSC22D1  
APBB1 LRP2  
TOP2B TOPBP1  
CEACAM1 MAP3K10  
AURKBINCENP  
GRIN3B DLG4  
JUP CDH15  
CTSB SERPINB13  
ARPC2 PRPF8  
KCNN4 RPS27A  
SRC PPARA  
ELAVL3 EWSR1  
PCNT CEP55  
CDK9 ARID3B  
DRAP1 PIK3R3  
UBE2L6 RNF40  
RTN4R RTN4  
EIF4A2 IBTK  
SET EP300  
SH2D1B SLAMF1  
RARA NRIP2  
SRC SOS2  
EGFR VAPA  
RAD9B HUS1B  
GRB2 UGP2  
RBMS2 FAM69B  
STXBP1 CDK5  
CXCR1 GNA15  
BLMH KBTBD7

C4ORF43 IKBKG  
HSP90AB1 PHB  
HDAC4 PPP2R4  
TP53RKTPRKB  
TERF1 MAPRE1  
QKI USH1C  
SHBG FYTTD1  
SRC SOS1  
MAPT SPTB  
SMAD9 ACTB  
PAX6 RGS3  
ABL1 AKAP6  
CDC42 MACF1  
SFXN1 IKBKG  
TSC1 DOCK7  
DSPP PPP4C  
YWHAG PIK3C3  
NFKB1 C1QBP  
SMAD3 RUNX3  
WWP2 DIDO1  
RPAP1 POLR3B  
CAV1 BTK  
KRT18 BBS4  
CASP3 GORASP1  
PTPN6 HOXA10  
RNPS1 U2AF1  
ITGAX JAM3  
MYL2 PPP1R12C  
ZSCAN1 ZNF407  
EIF3F HLA-B  
APBB1 SF3A3  
THOP1 MPHOSPH6  
APP GSN  
AURKBBIRC6  
NCBP1 POLDIP3  
WASF1 C3ORF10  
VCAN TNR  
GPR37 RPS27A  
EFNA2 ZHX1  
SSSCA1C20ORF195

ATM RHEB  
PTPRC CSK  
RPA4 MUTYH  
ACTC1 MIB2  
SFPQ SMARCD1  
CTBP1 HDAC2  
GATA3 MED1  
MIB2 JAG2  
PGGT1B RHOB  
CHGB UBTF  
CDK2 CASP4  
ESR1 KDM5A  
MOBKL3 SIKE1  
EP300 EPAS1  
ESR1 MPG  
GRB2 GOLGA2  
A2M KLK3  
GRB2 GOLGA3  
CLDN12 STRN4  
TUBB6 TRAF6  
MARCH3 UBE2E2  
EP300 TSG101  
GRINL1A ZNF410  
NCL CASP8  
AMOT YAP1  
BCR ATP2B1  
SMURF1 STUB1  
CCNE2 SUMO3  
VIM IKBKG  
MTAP MYLIP  
NCOA2 NCOA1  
KLF1 SMARCD1  
HNRNPA1 HNRNPA2B1  
IGF1 IGFALS  
HMGB1 INSL6  
PPP2R1B RAB11A  
GNB2L1 ST7  
EGFR DOK5  
GJB2 CAV1  
RBBP5 KIAA1967

KAT5 BARD1  
RBP1 RBBP7  
SNAP29CD7  
RPS14 NFKB2  
STX7 NAPA  
EP300 ZFPM2  
ZEB1 SMAD1  
PTPRC MBL2  
ZEB1 SMAD2  
UTRN PPIA  
PDGFRB VAV2  
NCK1 NTRK2  
DUSP6 ZNF182  
UBE2I CDCA8  
NDC80 AURKA  
MCM7 UBE3A  
CDKN1A HDAC4  
REV3L MAD2L1  
KCTD17 NIF3L1  
KEL XK  
NOTCH1 RPS27A  
PRNP RNPC3  
PRKCE PDLIM5  
CDC42 SH3D19  
CTBP1 CREBBP  
POLR3D ZNF496  
PRICKLE2 SMURF2  
SNAPIN SPAG5  
SKIV2L2 EXOSC10  
YWHAG C5ORF25  
VIM RAD23B  
RPLP2 MAP3K14  
NOTCH1 RPS27A  
VIM RAD23A  
CEBPD CEBPE  
YWHAB TESK1  
AMOTL2 MAD1L1  
HDLBP SOS1  
CRKL KIDINS220  
GABPB2 TDRD7

EIF3F SMAD9  
HNRNPR ABL1  
HDAC2 ANTXR1  
MAP4K4 DCTN1  
KHDRBS1 PRMT1  
FANCMFANCF  
RNF141 SMURF1  
IPO9 PRKAB1  
PTPN1 STAT3  
GTF3C1POLR3C  
RNF2 CBX8  
MMP14 ADI1  
TSC2 CAV1  
EIF4A2 CMBL  
EEF1E1 ATR  
SRC NMT1  
CLN3 SIGMAR1  
MYL12B MYLIP  
ATP1B1SMAD2  
EIF4A2 TARS2  
EP300 PRMT1  
APBB1 TFCP2  
AIMP2 KARS  
PSMD12 PSMD13  
RAE1 HNRNPUL1  
MBTPS1 ATF6B  
ABL1 PDIA2  
FOS ATF2  
DDB1 CAND1  
CDK13 ALK  
RAE1 SF3A3  
ERBB2 SH3BGRL3  
RASA1 G3BP1  
U2AF2 SRPK1  
STIP1 NPAT  
GUCY1A2 DLG2  
BLOC1S3 DTNBP1  
RHOA ARHGEF25  
KRAS SHOC2  
CANX MAP2K4

GRB2 DNAJA3  
PRKCB GJA1  
VHL C19ORF10  
MAPK8 WWOX  
PCBD1 ANKRD57  
CUL4A COPS5  
NKX2-1 PTRF  
SOX10 ALX4  
CAV1 PTPN11  
MDM2 TUBA1C  
GRB2 RBM33  
PJA1 NDN  
SYN1 GRB2  
MCM2 HIST3H3  
GSK3A SPG21  
USO1 STXBP1  
SLC9A1 WNK1  
OTUD4 BRF2  
NDUFB8 PFN2  
RAB3A RIMS2  
SUMO3 TDG  
MLH1 PARP12  
PLA2G1B PLAA  
SYVN1 DERL2  
XRN2 EIF3L  
SORBS3 RTKN  
CCT8 MAP3K3  
MARCH6 SHC1  
RARA KAT2B  
GORASP2 RAD54B  
CDC7 CHAF1A  
GSTP1 TGM2  
CCNE1 MRE11A  
KAT5 HDAC7  
RB1 MCM7  
RALYL PSMF1  
MAPK3 CASP8  
RBPMS CDC23  
HTT TRIP10  
UBE2N RNF167

SIN3B PBX1  
GEMIN4 KARS  
MDFI EWSR1  
LAMA5 MEP1A  
GRB2 OTUD5  
PRMT5 PRDM1  
HIST1H4I KAT5  
AR PSPC1  
ATRX DAXX  
UFM1 CDK5RAP3  
COL1A2 ITGA2B  
CLN3 GEMIN4  
UBR5 KPNB1  
IRS1 PTK2  
KEAP1 FAM123B  
GDF9 BMPR1A  
PPP1R2 PPP1CA  
MDFI FASTK  
MAP2K3 PKN1  
NEFL PKN1  
SCRIB LPP  
CENPF NUP133  
ATM TELO2  
EXOSC8 EXOSC4  
GAST TF  
CHMP4B PTPN23  
HIST3H3 GTF3C4  
FCGR3B IGHG1  
ACTN1 CDH1  
PCCA PCCB  
TPD52 TPD52L1  
CDC34 CSNK2B  
PPP1R2 PPP1CB  
CPNE4 PITPNM2  
SYK HDAC2  
MYO6 GIPC1  
POU4F1 EWSR1  
GHR NCOA6  
CALM2 RELA  
NELF GF11B

FTH1 FXR2  
HBM DKK1  
BUB1 NDEL1  
FOS RELA  
MAP2K3 MAPK14  
GAPDHTBK1  
HAP1 PDCD7  
VAV2 GAPVD1  
CCND1 CDKN1A  
UBE2C RANBP9  
SNAP23SCGN  
MAPK13 MAPKAPK5  
MAP3K1 TUBB6  
MAGI1 IGSF5  
TAF4 TBPL1  
PIN1 GGA2  
ATXN1 RNF31  
GYS1 PRKACA  
ASAP2 RAN  
PRPF3 GTPBP3  
DRD2 PPP1R9B  
RAP1A TCEB3  
EDNRA ARRB1  
TAF10 ATXN7L3  
HLA-A EFHD1  
CYP27B1 NCOA4  
LRPPRC USP49  
EXOSC7 EXOSC8  
BACE1 RANBP9  
EPB41 PCBD1  
ATXN1 BEND2  
VRK2 MAPK8IP1  
RFC1 BRCA1  
CDK5RAP3 DISC1  
IFFO1 ACAP1  
RBBP6 ANAPC16  
STT3A ITM2C  
RFC3 CHTF8  
THRA CDK8  
ATP1A1 TRADD



BECN1 TBC1D7  
OTUD4 TMBIM4  
SLC3A2ARF6  
ASS1 ASCC2  
ACTR3 WASF2  
PRKCA GRIA4  
PSMC3 TRAF6  
SHC1 CDH5  
PTPRG PPFIA1  
PPP1CABAX  
PRKCA SLC6A9  
TAL1 CHD3  
UBC TRADD  
RAC1 SET  
PPP1CABCL2L1  
ATF7 MITD1  
PSMD4 ADRM1  
SCAND1 ZNF434  
CFL1 YWHAZ  
CREBBP GCM1  
NID1 COL13A1  
RCVRN CAV1  
RIPK2 HADHB  
TP53 GSTM4  
RAB6A HLA-B  
MYL6 MAP3K3  
KRT14 DST  
OSM COL4A3  
PARN MPHOSPH6  
YWHAG LBR  
GABARAP STK3  
CDH2 PTPRJ  
DHX9 PRMT1  
USO1 SEC22A  
VCL ABI2  
GRB2 BICD1  
GAPDHSTIP1  
NEFH MAPK1  
PDGFRB VAV1  
TRIM23GEM

WDR5 ASH2L  
PDE4DIP TNIK  
ARNTL KAT2B  
NFKB1 ITGB3BP  
MATN3 MATN1  
EFNB2 RHBDL2  
FGF2 FGFR1  
MAPK14 CCDC97  
AP1G2 UBE2Z  
HTR2C ARRB2  
UBE2I SPECC1L  
MEN1 HCFC2  
USP22 TAF6L  
FST ADAM8  
RAB1A TBC1D17  
DHX15 SF3A2  
EIF4A3 TCEA2  
BCL2L1 RTN1  
MYH10 USP45  
CD59 CD9  
CDK1 EEF1D  
RBL1 NEK6  
HMGB1 AGER  
RND3 UBXLN11  
ADRA1B FLNC  
RBL1 SUMO2  
KCNJ2 DLG1  
DYNLL1 MTR  
AR XRCC5  
NASP NFYC  
MAP3K3 MMRN2  
YWHAQ EPB41L3  
KIAA1267 USHBP1  
GALK1 DMWD  
MYO6 RIPK3  
HSP90AA1 IKBKE  
EPS15 STON2  
PEX12 PEX10  
MUC1 CTNNA1  
PTPN11 ERBB4

RFC1 MSH2  
PARP1 MED17  
SOCS3 PRLR  
PFDN1 TMEM90B  
BMPR1B GDF9  
GP1BA ITGAM  
CDK9 CSNK2B  
CTNND1 ZBTB33  
HGS PPP1R16A  
VCP TOMM34  
SERPINH1 C2ORF18  
MYST2 PHF16  
PRLR YWHAG  
CASP3 PTGES3  
TP73 STAG1  
CLN3 TRIP13  
GHR PTPN2  
HRK MCL1  
RNF165 UBE2W  
DCTN1 BICD1  
IPO5 RAG2  
AR DAXX  
FEZ1 RAB3GAP2  
NFKB1 NOTCH1  
LYN CDKN1B  
SUV39H1 PML  
GLI3 CREBBP  
PARK2 DLG1  
CREB1 HPS6  
ITGA2 FHL2  
ATRX KIAA1377  
ZHX3 ZHX1  
HRK BCL2L1  
TTK CDCA8  
NSF NAPA  
AKAP17A CCDC85B  
RAC1 DOCK8  
IRAK1 PELI3  
HSPE1 FTSJ1  
IFNAR1 AP2M1

SYNPO WNK1  
AP1B1 AP1M1  
TSC22D1 MTHFD1L  
TNFSF11 NFKBIA  
ERBB2 HSP90B1  
TRIP13 GPSM1  
PRKCB CYTH2  
PRKACA TRIP11  
PRKACA TRIP10  
RAB3A BSN  
HDAC1 TGIF2  
RPL28 SMAD4  
RNF8 ORC2  
RNASEH2A BRCA1  
TAF4 CREM  
PTP4A3 NUP93  
CLU PPARG  
ISL1 LHX3  
AR NR2C1  
TSC2 AKT3  
CFB CFP  
SIAH2 SNCAIP  
HNRNPK PRKCD  
GABARAP OPRK1  
FURIN DSG3  
MCM3AP APC  
PIK3C3 PIK3R4  
NQO1 DNAJB1  
RHEB TSC1  
EIF1AY EIF5B  
STK3 LATS2  
SUPT7LMED1  
SOX10 OLIG2  
CTBP1 KAT2B  
MAT2A PRKAB1  
HNF1A CALM2  
MAPK3 KSR2  
INHBB ACVR1C  
UBE2A CDKN2A  
ATAD3A RIPK3

SMAD3 CUL1  
VAV1 SIAH1  
SFXN1 PHLDA3  
DLST IKBKE  
SMAD3 PEX6  
GRB2 PPP3CA  
EXTL3 CRK  
MYC CTPS  
SNRNP200 MCC  
GRK5 SNCB  
RFC3 CHTF18  
VPS11 GGA3  
ERN1 BAX  
CDH1 PPP1CA  
HTR2A MAP1A  
ESR1 NANOS3  
HNRNPC CSNK2A1  
GJA1 S100A1  
BRCA1 DNAJA3  
MLH1 SPTAN1  
LYST NCDN  
SUZ12 MTF2  
ACTR2 WASF2  
SGSM2 GDPD2  
SIVA1 BCL2L1  
NFKB1 RPS3  
MECOM SMAD1  
EXOSC8 EXOSC3  
EXOSC8 EXOSC5  
MECOM SMAD2  
ARL2 PPP2CB  
TERF1 SMAD2  
MYC PRDX1  
HGS VMP1  
RNASE4 PTEN  
USO1 GBF1  
PAFAH1B1 DNAI1  
SUMO3 CUL3  
RPS27A PRPF8  
TUBA1A SPG20

DCAF8 GTPBP3  
ACLY IKBKE  
SMAD3 SMURF2  
USP19 SEC61A2  
ANK3 HOOK1  
RPL35ANFKBIB  
SGTA GHR  
COPS2 COPS6  
PIA PTPRN  
MAP2 PRKAR2A  
CASP3 CASP6  
CASP3 CASP9  
FBL CENPA  
RABIF RAB15  
IKZF1 NCOR2  
HMGB1 CASP3  
STK3 RASSF1  
PBRM1 SMARCC2  
RBP1 BRMS1L  
IRS1 PRKCZ  
BLK BCL2L1  
CDC25B BRSK2  
HBXIP UTP14A  
GNAO1 CXCR5  
SDSL TUBGCP4  
HCFC1 TAF9  
YWHAG PPP6R3  
GATA4 JARID2  
PTPN6 CUZD1  
GRB2 ZNF274  
INPPL1 INSR  
EIF4B USP11  
CDK4 CDKN2D  
OXA1L MRPL48  
CS ARF6  
PRPF4BRBM23  
RPS27AMIB1  
SPTA1 ACTA1  
THRB PRMT1  
KDM1ASUMO2

ADAM19 ESF1  
EWSR1 NINL  
NEK6 MYO1A  
SNCA MAPK8  
GOLM1 NIPSNAP3A  
SREK1 THRAP3  
SNW1 JDP2  
SUMO3 TP53BP2  
ASAP2 PTK2B  
HCFC1 RBBP7  
DCX PPP1CA  
YWHAG ZNF295  
EIF3E COPS7B  
MAD2L1 CHFR  
PRKAR2A AKAP7  
DFFA TTN  
MEP1B ALK  
PRKACA SLC9A3R2  
CHD4 USP36  
UBE2W TRIM31  
EPB41 SYCP2  
EFNB1 SORBS1  
VIM ZHX1  
MYO6 RNF11  
PGRMC1 DDOST  
APBA1 CNTNAP4  
ZNF18 PAK1  
SAP30 ID3  
TNFRSF19 TRAF6  
C3 CFH  
DPM1 DPM2  
ALDH2 UBA5  
CNBP IGF2BP2  
SRC MYLK  
PTPRF NID1  
MYCBP2 RAPGEF2  
CCDC85B KIAA1267  
CCDC85B NUP54  
BECN1 SMC1A  
HEXIM1 RELA

OTX1 RBPMS  
RPS27APOLQ  
MAP4K4 PDE1A  
APBA1 NRXN1  
IL6ST LIFR  
HIST3H3 NAP1L4  
KAT5 CCT7  
RPS24 MAP3K14  
TRPC5 TRPC6  
SERPINA3 MMP1  
SH2D3C SNCAIP  
BRCA1 FLI1  
DUSP2 MAPK14  
USP14 PPP3CA  
EP300 CITED1  
TPSAB1 NCK1  
SLC2A4CFL1  
EP300 CITED2  
EPOR CSF2RB  
NCK1 PKN2  
PIAS1 GLUL  
RAE1 SMC3  
ZNF7 RPL7  
CDKN1A C1ORF123  
CDH2 PTPRG  
UBE2I RANBP9  
CDH2 PTPRB  
HGS STAM  
GNAI3 RIC8A  
DAND5 GATA4  
CDH1 AJAP1  
GJA1 MAPK3  
NEK6 COPG2  
UBE2D1 ZNRF2  
TEC DOK1  
ACTN1 GF11B  
PSMC3 PRKAB1  
GDF9 RSRC1  
ARHGAP18 MPHOSPH6  
RAC1 PTK2



PML SUMO3  
BCL2 RTN4  
EPS15 RPF1  
ARRB2 OPRD1  
MECOM CTBP1  
ORC5 RPA2  
PRKCB NUMB  
HRAS BRAF  
HSPA5 NFKB1  
MED23 TRRAP  
ELANE NOTCH2NL  
KHDRBS1 SH3GL1  
CDK1 PPP1CA  
MMP14 LIMK1  
EPB41 HSPE1  
HSP90AB1 NUMA1  
SLC25A6 CHD3  
PRKCA GABRG2  
PIP4K2A BTK  
RNF2 SMURF2  
CDK2 POLD1  
PLIN3 SMAD2  
RND2 ARHGAP5  
ESR1 MSH6  
KAT5 SCFD1  
YWHAG CEP250  
UBE2W TRIM8  
HIST1H4I CREBBP  
HIST1H4I MYST3  
PPP3R1 CABP1  
TEC PIP5K1A  
SFPQ WWOX  
CREB1 MAPK14  
RAN NXF1  
KAT5 TRIB3  
NUP188SLX4  
RARA ITGB1BP2  
THBS1 CORO1A  
MCC COPB2  
HSPD1 YWHAZ

ZFYVE9 LRP12  
CBL F2RL1  
SRC CDC25C  
ATXN1 DNAJA3  
HLA-B DAD1  
SHC1 PTK2B  
KRT20 FAM164C  
PRKACB PKIB  
AP2A1 RIT1  
RAB11A DTNBP1  
NIPSNAP1 GABARAPL1  
NUDT21 CD2BP2  
ITGAV PTPRZ1  
DSC3 PKP4  
CBX5 TCEB3B  
SRC PXN  
OLFM2 ST13  
EMX1 ALX4  
TCF3 RALGAPA1  
TRAF2 SPATA18  
TH YWHAG  
CD44 TIAM1  
ASAP2 GRB2  
TUBB RAB8B  
RB1 MDM2  
SNCA PARK7  
SSBP2 LDB1  
RHAG CD47  
MAPK8 PXN  
EXOSC2 DIS3  
PTPRG GRIN2B  
SUV39H1 HIST1H3J  
THOC4 LEF1  
TTI1 MTOR  
HTRA2 PEA15  
YWHAG CLINT1  
GAK CDK5  
CDKN2A CDKN2AIP  
CBX4 FHL1  
CCNE1 GSK3B

TGFB3 LTBP3  
RNF168 RNF11  
DEDD RANBP3  
ALDH2 HSPD1  
BMP4 STAP2  
OBFC1 TUBGCP4  
ESR1 STUB1  
HCK PIK3R1  
MAZ KEAP1  
ABL1 CAT  
CBX5 MIS12  
DEDD USP22  
RALA TSC2  
HDAC1 LGALS12  
PRNP PPARG  
DYNC1I1 TUBB1  
CRX CREBBP  
TCF3 ID3  
AP4M1 CD63  
OAZ2 SLC25A21  
MARS BRF2  
PLS3 NFKB1  
TECPR1 TTC15  
TCERG1 CHD3  
TCERG1 SF3A3  
CDC42 RAC1  
SDCBP SDC4  
PAK2 ARHGEF7  
UBE2D1 DZIP3  
CHRM3 CSNK1A1  
FSCN1 ACTR6  
UBE2I UIMC1  
PML ZBTB16  
CTBP1 BCORL1  
DHX9 GEMIN4  
KDELRL1 SERINC3  
MAP7 TRPV4  
ACTC1 PRKCE  
PDE5A PRKG1  
IKBKE C6ORF211

PMS1 CDC5L  
HSP90B1 EEF1D  
GSK3A BICD1  
PRRC2B RERE  
ZFYVE9 SMAD2  
TCEB2 ASB2  
PAK2 GIT2  
ENO2 SUMO4  
HOXB9 EP300  
PRNP AIFM3  
GSPT1 UPF1  
UBE2D1 DTX1  
BCR WDR48  
SNAI1 HDAC2  
H2AFX PEF1  
CRADD RIPK1  
VIM RIPK3  
TP73 PPP1R13L  
ZFP36 MAPK1  
CDK8 SMARCC2  
LSM7 LSM2  
ATP1B1GCH1  
TP53 TEC  
COL1A1 BGN  
EFS PIK3R1  
FES DPYSL5  
AKAP5 PRKAR2B  
LEPRE1WDR48  
INSR RHOB  
HDAC1 NR2E1  
TRAF2 NIF3L1  
CDK1 CNOT7  
IKBKB CFLAR  
DIAPH1SRGAP2  
HLA-A HLA-C  
ELAVL1 PAIP2  
ARAF TIMM50  
MCC MYH10  
DLG1 AMOT  
ARID1A ARID1B

CCBP2 CCL28  
SLC25A6 TNFRSF1B  
ERBB2 BTC  
DLGAP1 DYNLL1  
CSK MAPK15  
SPRY1 GEMIN4  
TCF3 NHLH1  
ATR CLSPN  
CBFA2T2 ZNF652  
HIST1H2AE EP300  
MECP2 RBPJ  
MOBKL3 RAPGEF2  
RTN4 COL4A3BP  
MOBKL3 PLEKHM1  
CDIPT TNFRSF1B  
DUSP6 MDFI  
SHC1 LRP1  
AP3D1 CTGF  
PLRG1 CPVL  
SRF ETV4  
HIST1H4I KAT2A  
HIST1H4I KAT2B  
PAX8 POU2AF1  
EMD BCLAF1  
SPTBN2 MINK1  
POLA2 HRH1  
IKBKE SFXN1  
ZFYVE9 PPP2R1A  
RAB35 TBPL1  
TADA3 TAF9  
STAT3 FOXM1  
BCR VAV1  
DCAF8 MDFI  
PIK3R1 LTK  
MAFG PRRX1  
COPB2 UBA5  
RXRB APPL1  
PIAS1 DDX21  
DNAJB1 PTGES3  
E2F1 PKIB

EIF3F HLA-C  
RAD21 CHD3  
DPM1 CIAO1  
CENPB PARP1  
HOOK3 AKTIP  
THRB TSG101  
TG CANX  
TAF1 HIST3H3  
SOCS1 MPL  
EIF3D EIF4A2  
ORC4 MCM3  
PTN BMI1  
MLL2 WDR5  
LYN RPS6KB2  
CDC37 CDC37L1  
PTN BMI1  
KCNH4 MAPK1  
EGFR TNC  
PHLPP1 PHLPP2  
NFKBIB KIF18A  
LYPLA1 IKBKE  
SERPINE2 COL4A3  
PLCG1 KHDRBS1  
TPT1 SMAD2  
YWHAG SHCBP1  
FADS1 PAAF1  
PSMF1 RNF126  
NFKBIB POLR1E  
NUPR1 PAXIP1  
PPP6C PPP6R2  
PBX2 RPS6KC1  
CASP3 RABEP1  
CCNE1 RBL2  
GUCY2D GUCA1B  
LTA CLSPN  
GRB2 SCARF2  
CREB3 NFIL3  
EIF3H MCC  
SAP18 ACIN1  
UBE2L6 DTX3

EYA2 GNAZ  
HMGA1SUFU  
PLEKHA1 SH3BP4  
BACH1 HMMR  
IFT88 RPGR  
SMAD2 RAB34  
NGFR KIDINS220  
MAPK1 ARHGEF2  
COX6C PTN  
DPPA2 ZCCHC10  
SKIL TSKU  
GRIPAP1 ARL15  
NEDD4L WNK1  
NCK1 GABBR1  
ZBTB25C19ORF50  
TPR SMAD2  
SERPINH1 KLF13  
MLX MAD1L1  
CDH1 ANAPC7  
MAP3K1 TUBB2B  
HDAC2 SUDS3  
ERBB2 BMX  
CDH1 CDC23  
ASCL1 NEUROG2  
APC2 CDH1  
IGF1 IGFALS  
VCP NFKBIB  
ADAM15 TRIP13  
TRA2A TAF9  
CCDC130 TRAF2  
GTF3C1FGFR3  
PLEKHM1 MOBKL3  
CDH1 ANAPC4  
PDPK1 PRKCI  
MAP3K7 PELI3  
ERC2 GRIP2  
GRB2 SMARCD1  
PRKCB PA2G4  
POLR2H TRAF6  
LPL CETP

EGFR OAZ1  
CTSD MARCH9  
PIK3R1 PTPN6  
SRP72 HLA-B  
EYA2 RBPMS  
PRICKLE3 FYN  
CD8A HLA-E  
PIK3R1 SHC1  
STAM2 EPS15  
SEPHS1 C9ORF9  
PRKCZ PPP3CA  
ITGB1 FLT4  
ERBB3 PTGES3  
YWHAB FOXK1  
KCNH4 MAPK11  
UBE2D1 RNF130  
KCNA2 CNTNAP1  
KCNA2 DLG4  
KDM1AGTF2I  
GSK3B TMEM132A  
GPRASP2 KIAA1377  
S100A10 TRPV5  
UBE2T MARCH5  
BACH1 NCOR1  
TNFRSF1B RPS3  
G3BP1 FAF1  
NAMPTDDA1  
STX1A STX8  
PRSS1 SERPINB13  
CBX1 TRIM28  
POLR2H POLR3H  
TERF1 GIT1  
CDK2 RADIL  
TNFRSF1B RPS16  
KRT18 CASP8  
UBE2D1 LRSAM1  
ERN1 UBC  
HBP1 SERPINI2  
ATM USP34  
TCF3 HDAC2



NUP93 NUP205  
SUV39H1 SIRT1  
AHSG DCN  
TNFRSF1B RPS14  
ESR1 CAV1  
POP4 RPP25  
ACTC1 LASP1  
RELB CPSF6  
IRS1 PRKCD  
AP3B1 SLC30A3  
PTPRC GRB2  
TRAF2 RHEBL1  
USP22 TRRAP  
TCF3 CREBBP  
RPS27ARBCK1  
HLA-B RPL37A  
CLN3 SDS  
NOL3 VASP  
AR TSG101  
CDK16 YWHAH  
APC NUP62  
PLK1 CYLD  
SYNJ2BP ACVR2B  
SAP18 OSBPL10  
DNMT1 SP3  
TUBB MAP3K8  
AIP PDE4A  
CD19 CD79B  
LRRCC1 C14ORF119  
IGF1R PIK3R1  
BUB1 CRK  
TP73 CABLES1  
ZBED1 NUDT18  
CLN3 UNC45A  
KIF1B DLG1  
EXOSC6 EXOSC1  
RIOK3 ARL1  
HIVEP2 YWHAH  
ROS1 IKBKG  
HGS CLTC

LSM1 RRP1  
CTGF TGFB2  
KRT20 C9ORF16  
SQSTM1 MAP1LC3B  
GCLM PHLDA3  
RLN1 RXFP1  
TP73 EP300  
PRKCG YWHAE  
ARRB1 AP2B1  
SMAD9 AP2A1  
TSPAN4 ITGA6  
COG7 COG4  
GATA1 HSPA4  
DAG1 MAGI1  
COLEC11 SRSF6  
RXRB SOS2  
PSEN2 UBQLN1  
SNX4 AGK  
TNKS VPS33A  
TAC1 PREP  
PHLPP1RBM15  
ITGB2 GNB2L1  
SMAD3 NFYC  
SMAD3 RUNX2  
PRNP FGF13  
NRXN1 MACF1  
TGFB1 SPTBN1  
SPARC TGM2  
CREB1 CRTC1  
CALR NKX2-1  
TRIM21CDKN1B  
NPM1 SHC1  
WASL SORBS3  
ITGA5 FGFR2  
LIMS1 ILK  
PARK2 SNCA  
AR KDM5B  
MYC TAF10  
BACH1 RPS27A  
TIA1 FASTK

CASP8 STK24  
CNOT10 CNOT8  
FZD7 DLG2  
EIF4E2 UBE2L3  
TAF6 RAN  
HELZ SMYD3  
FGF2 SDC4  
UHRF2 PCNP  
PTPN6 MS4A2  
ARL6IP5 ARL6  
VHL UBE2K  
C3 CTSG  
WDR36 G3BP2  
VHL UBE2N  
PPARA AKAP13  
SCAMP1 SCAMP2  
VHL UBE2M  
CD247 JAK3  
XPA PRKDC  
PGR BATF3  
ACTN1 CDK5R1  
GABRB3 GNB2L1  
CDK5RAP2 MAGEH1  
CASP9 ILK  
YY1 GTF2I  
CNBP MYH4  
PSMC4 RORB  
VIM RABAC1  
PDCD6 SEC23IP  
PTPRC JAK1  
VHL UBE2D3  
TWF2 ACTR3B  
AP3B1 ARR3  
RAF1 CPS1  
HSPD1 AMFR  
NDUFS3 GZMA  
GRIN2D GPRIN1  
GSK3A YWHAG  
NEDD8 BTRC  
ZNR4 UBE2D4

BRCA1 SMAD3  
UBR5 USP49  
MTDH LYAR  
CASP2 DCTN1  
EP300 CDX2  
PRPF4 PRPF4B  
RAD21 SMC3  
BCAR1 NEDD9  
NDUFS7 ENO2  
NCOR1 PGR  
PBXIP1 UBQLN4  
COL2A1 COL9A1  
SSTR1 SSTR5  
ESR1 ZBTB16  
DNALI1 HTT  
NF1 GPRIN1  
MAT2A TRAF6  
HIST3H3 SETD7  
GDI1 RAB1A  
NCK1 ABI1  
WAS LCP2  
MAP3K3 RPAP3  
EEF1E1 ATM  
COL2A1 COMP  
EIF1B KCTD12  
DVL2 TRAF2  
PRPF6 ESR1  
RBPMS C12ORF12  
TGM1 SEMG2  
BRCA2 RAD51  
SOCS3 JAK1  
LIN7A KCNJ12  
TF IGFBP6  
TF IGFBP5  
OMA1 LRP1  
PPP2R1A PPP2R5E  
CBL PIK3R1  
GRM3 GRASP  
FARP2 SRC  
KCNMB1 EWSR1

SMARCA5 CTNNB1  
CASP8 IKBKG  
COG2 COG3  
EXOSC2 UPF2  
CLSTN1 APP  
GNAI1 HRH4  
BRCA2 PLK1  
HDHD2 LUC7L2  
KIF11 MEPCE  
MLH1 RAD9A  
UBE2D2 RNF167  
CUL2 KCTD5  
RASA1 GAB1  
ARIH2 UBE2T  
SKIL CPNE1  
TECPR2 GABARAPL1  
DYNLL2 SHANK2  
GRB2 REPS1  
TPM2 S100A4  
STAT5B NCOR2  
CDC42 PRKCZ  
EXOSC8 RASSF1  
NR1I3 CHD9  
VHL RAB2A  
TAL1 ZHX1  
NUDT21 CPSF6  
PKN2 HDAC5  
SYT7 STX4  
TAF6 SIN3A  
ABL1 YTHDC1  
WWP2 IL2RG  
TAB2 HSPA1B  
GRB2 AP2M1  
UBE2K UBE2I  
STAT1 BMX  
ZNF32 GRB2  
PAX9 KDM5B  
CFLAR HNRNPL  
APP EXOC6  
XRN2 UPF2

RBMX CCDC33  
PRKCG TOP2A  
AP2A2 EPN1  
PIGP PIGQ  
DSPP CASP9  
DSPP CASP7  
PARK2 RAD1  
SLC25A12 PELO  
DSPP CASP6  
VIL1 PLCG1  
MAP3K7 RUVBL1  
RHOH UTP14A  
FGF13 SCN8A  
CREB3 STX8  
YWHAE SYN2  
SRC STAT1  
SRC STAT6  
RPN1 C20ORF24  
APRT MCC  
SRC STAT5A  
IGHM HSPA5  
HES4 COPG2  
PIGR TGFBR1  
SMARCA4 SMARCC2  
ATP6V1A TUFM  
YWHAZ ZFP36L1  
PRPF40A PIAS1  
YWHAG KRT33B  
RPS14 TNIK  
ALB SRGN  
TAF7 TAF8  
DIAPH2NCKIPSD  
SETDB1 MBD1  
CHAF1A MBD1  
RPS16 MAP3K1  
RPF1 MAP1LC3B  
FLNA ITGB7  
DCN COL14A1  
PSEN2 ICAM5  
UBA5 FARSB

ATXN7L2 USP22  
SNX2 SNX1  
PTN BCCIP  
CDKN1A EP300  
AXIN1 TUBG1  
PPIB IKBKE  
GAK CLTC  
PDE4DIP CDC5L  
IL1R1 TRAF6  
MYB SMARCA2  
USO1 GABPB2  
CBX5 NIPBL  
TRAF2 AFF4  
THRB MPG  
S100B CACYBP  
GRINL1A KIAA1377  
RBMX HNRNPK  
STRN FAM40A  
PRTN3 SMAD3  
PPP3CAMYOZ3  
BCL2L11 DYNLL2  
KAT5 NAP1L5  
MAP3K7 RUVBL2  
PRKAR2A NBEA  
GNAI3 NGB  
RTN4 TRAF6  
NR1H2 MDFI  
CBLB ABI1  
SLU7 CCDC85B  
HSPA12A NRCAM  
ATXN1 KLHL8  
RLIM LHX3  
SPTBN1 DAXX  
PRAM1 MAST1  
RAD51L3 RADIL  
HSPD1 CASP9  
PRNP PDE4DIP  
CCNT1 SNW1  
NOTCH1 SMAD3  
TSG101 RAD18

POLR2C WDR77  
CDK1 NDEL1  
MYB TTF2  
ESRRA ESRRG  
MED21 MED30  
ANP32A ELAVL1  
MYC NFYB  
GNGT2 KCNJ4  
ITGA2BGRB2  
MYC MCM3  
RAB11FIP2 RAB11FIP4  
PQBP1 POU3F2  
MNAT1 EEF1A1  
PRKCA VCL  
RBP5 MPP3  
SRC NR4A1  
KIF3B RAB5A  
SYNPO MAGI1  
CDK5R1 TSC22D4  
CDH2 GPRIN1  
ESR1 HDAC5  
KIF3B RAB4A  
BID CASP8  
PCBD1 TUBB2C  
ERBB2IP RPAP1  
SOCS1 JAK3  
FKBP1A PPP3CA  
TGFB1 FBN1  
MAP3K7 TAB3  
ARHGDIA FADD  
AURKACKAP5  
PDCD6 KIAA1244  
CD48 EEF1D  
HLA-A ATP2A3  
PARN BARD1  
SPOP RTN3  
HNRNPD SUMO4  
RPS23 UBE2W  
WSB2 EZH2  
SKIV2L2 UPF2



FBXW7 NOTCH4  
PDHA1 ITGB3BP  
HBB DMWD  
CD2BP2 KHDRBS1  
CAPNS1 IL2RG  
EP300 MAP3K5  
PCSK1 PTK2  
WBP4 WAS  
TIMP2 PSME3  
RPRM FBXW11  
SHH PTCH2  
ITGB1 RAB5A  
EIF2S2 EIF2S3  
RPS27AFANCD2  
UBE2D1 RNF2  
AR DCAF6  
SNCA CLTC  
LMX1A LHX3  
PTP4A3 SSR3  
TAB2 HDAC5  
ETFA ELF3  
SSB MAP3K14  
KDM5ASUZ12  
PSMC5 TAF10  
MAGEA11 TMEM123  
EPB41L2 YWHAQ  
IGF1R JAK1  
MLLT4 MLL  
EZR RHOA  
EGLN2 EPAS1  
GORASP2 TSC22D4  
PACSIN3 PACSIN2  
FN1 LPA  
PRKAR1A BEX2  
NFKB1 HDAC1  
NFKB1 RIPK1  
MAPRE2 NIF3L1  
C11ORF48 LYAR  
GF11B EHMT2  
MCM3 HIST1H4I

AKT1 NCOA4  
SNRNP200 GRB2  
NEDD8 AKIP1  
PPP1R15A HABP4  
HNF4A TGS1  
SCD CYB5A  
CTPS HLA-C  
TRAF2 BAHD1  
HLA-A BCAP31  
ACP1 SPTAN1  
CBL PTPRG  
GGN FANCL  
BPNT1 IKBKE  
SLIT3 ROBO2  
PRKAR1A MAP1LC3C  
PIK3R1 EEF1D  
PRKG1 LASP1  
FLT1 PTPN11  
TRAF2 LNX1  
HLA-B RHOA  
GATA4 ID2  
SMNDC1 TSR1  
DEC1 ZHX1  
PSMB3 PSMB7  
RPS27ARNF11  
SUMO1 SENP6  
CALM2 OBSCN  
NUP133AHCTF1  
HIST1H3J SET  
ADRB2 GRK5  
CASP8 GMEB1  
YWHAQ SRSF1  
AP2A1 SHBG  
ZNF165 PDLIM7  
REPS1 STON2  
UBE2N MARCH7  
SMNDC1 SF3B2  
COPS6 MYEOV2  
ATXN3 TEX11  
PHB2 NR2F2

ESR1 MED10  
RFC4 CDK9  
JAM3 PICK1  
IFNAR1 PRKACA  
ATP5C1 POLA2  
HIST1H1E CBX1  
MLLT4 NRXN3  
CENPB PARP2  
SYK MAP4K1  
TAL1 DRG1  
PRKACA STK11  
UNC119 LUC7L2  
EIF1B CALM2  
SRF SSRP1  
USP46 WDR48  
BMP6 ACVR2B  
MET HGFAC  
ETS1 CPLX2  
VAV2 BRDT  
ATXN1 RBFOX1  
CNN1 ACTA1  
RFXANK HDAC4  
RDBP YWHAG  
MSR1 HOOK3  
XRN1 EXOSC8  
CBX1 CBX3  
WDR47 FAM107A  
BCL2 AVEN  
GRIA1 GRIPAP1  
TJP2 TRAF6  
TP73 C6ORF165  
COL4A5 KLK6  
VIM TXN  
PPP2CBGAD1  
IPO9 IKBKG  
MAX PFKP  
BIRC5 USP9X  
PRMT1 WDR33  
NFKB2 PSMD1  
AR YWHAH

IRF1 ULK2  
CNBP SRSF6  
TAF1 RBL2  
PARK2 SYT12  
SMAD3 PRDM16  
EP300 GTF3C2  
EPS15 LAPTM5  
CBL PTPRB  
YLPM1 WDR48  
EGLN1 ING4  
MATN2 FBN2  
CTNNB1 SMAD3  
JAK1 TEC  
JAK1 ABL2  
HNRNPH1 HNRNPF  
CTNND1 CDH24  
RPL35 MAX  
GRB2 MSI2  
NONO TBK1  
CASP3 PXN  
HNRNPK RBM42  
ZRANB2 USP39  
GGA2 SYNRG  
PPP2R1A PRDX2  
STXBP2 DDX20  
TSC22D3 PLEKHF2  
GNAI2 OPRM1  
DLX4 MAGED1  
YLPM1 USP45  
USP8 CHMP2B  
BMPR1B PPP3CC  
MTOR YWHAZ  
XPO1 TNFRSF1B  
MPRIP RIPK3  
AR BAG1  
CCT3 PAFAH1B2  
CDKN1C LIMK1  
RAI1 MAML3  
MYC TP53BP1  
CCNB2 CDK2

RFC5 CHTF18  
UEVLD SDF2L1  
FN1 COL4A2  
SRC ARHGAP1  
HDAC4 AHRR  
PRAM1 RNF32  
PACSIN3 ASAP1  
TNFRSF1B CSE1L  
TMEM147 BRF2  
RGS20 OSTM1  
TCF3 HOXA1  
TH YWHAB  
STX7 GTF2I  
SKIL RNF4  
COL4A2 TGFBI  
MRE11A RAD50  
ECT2 PARD6A  
PLD2 PEA15  
SHC1 GRB7  
SYNJ1 PACSIN3  
GNB5 RGS11  
ATXN1 FHL2  
NOS1 ZDHHC23  
TRAF1 TIMM50  
SRC LRP1  
NRP1 KDR  
PSMB3 YWHAZ  
KRT14 MDM2  
TAF1 TAF10  
BCOR USP7  
MCC TSFM  
TBCE TBCD  
UBE2W UHRF2  
MYC TMEM33  
RXRB AKAP13  
LCK JAK3  
SCAF8 CDC5L  
SF3B4 CDC5L  
EPB41L2 NUMA1  
PDS5B SMC3

MATK EWSR1  
PSEN2 NOTCH3  
PSMB1 PLK1  
LAMB1 COL6A1  
BCL2 MAPK8  
EGFR TGFA  
EGFR EGF  
DHX9 MAP3K14  
CHD1L UBE2O  
UBE2D1 CADPS2  
CTNND1 PTPRJ  
HSP90AB1 MYH9  
TSC22D1 KIAA0090  
SPTB NCAM1  
ITGA5 CD9  
MED14 AR  
RAP2A ACVR1  
ALK IKBKG  
KNG1 VTN  
EGFR PKIA  
KIAA0776 GSTK1  
PRPF40A STIM2  
PLAUR EEF1A1  
STK25 CCM2  
GRK6 SNCB  
CADPS2 UBE2W  
EIF2AK2 TIRAP  
TRIM2 TNIK  
GIPC1 PRKCA  
SKIL EIF4G2  
CYTH3 FRMD4B  
RTN4 PRKAB1  
MTOR PPP2R2A  
CD44 SCYL3  
CDC42EP2 RHOQ  
MYO1DMAP3K3  
USO1 PLCG1  
MCC RPS6KA3  
HSP90AA1 FKBP8  
EGFR IGF1R

OMA1 DAB2IP  
CTNNB1 ERMN  
CRK CDH1  
ATXN1 POM121  
SPRR2A ITK  
KIF1B TFCP2  
PTPN11 PDCD1  
KAT5 RCHY1  
PRPF40A RCC2  
DLG1 GPR124  
XRCC6 HN1L  
ATXN1 UBAP2L  
ITGB1 CD36  
CAPZB DMWD  
HIST1H3J GSG2  
HSP90AA1 FYN  
SHBG MT1F  
AR CEBPB  
PLG RBBP6  
EIF1B PINX1  
CCDC33 C19ORF50  
SYNC DTNA  
C1QA CSPG4  
CBX1 CHAF1A  
HLA-B SET  
HLA-B HSPE1  
C17ORF28 RBBP8  
GAPDH USP25  
PAXIP1 MLL3  
GDF9 BTBD2  
FXR2 FBP1  
COIL PREPL  
VPS35 USP43  
COPS6 TSG101  
PTP4A3 KIAA1967  
CDC34 TMEM14C  
INHBB INHBC  
HIST1H3J IPO4  
HNRNPA2B1 WNK1  
EFS ABL1

HAT1 BAP1  
ABL1 PAK2  
HSPD1 ALK  
FAM76B KRTAP4-12  
GNB3 GNGT1  
ACTB SMARCE1  
TNFRSF8 TRAIP  
GNB3 GNG3  
ABL1 ASB16  
ZNF638 EFEMP2  
GIPC1 NOC2L  
ACTR2 TRAF6  
DAND5 TBP  
TBC1D4 TET2  
COBLL1 PACSIN1  
SNRPD3 SRRM1  
ACTN4 SACS  
SRC AXL  
SOCS1 IGF1R  
HTRA2 RNPS1  
RAPGEF3 MAP1A  
MOBK3 STK24  
BCR PXN  
PAK3 SYN1  
SSRP1 MCM6  
PIN1 RAI1  
OCLN ITCH  
MYC SMARCB1  
HLF CREBBP  
MPP6 DIS3  
RRM2 RRM2B  
ATF7 C19ORF2  
PRKCB ITGB7  
GYPB RHAG  
RAR PNRC1  
PTPRE PTPRS  
ITGB6 FLNB  
RNF111 UBE2D4  
TP53 BANP  
MLH1 ACO2



YWHAG CCNY  
RASA1 CAV2  
EP300 NPAS2  
USP19 HERC2  
DAND5 CCNA2  
F10 F5  
DAND5 SYK  
RAF1 PRKACA  
MCC ACACA  
TSC22D1 KRTCAP2  
PRKCD PTPN22  
FCAR OSCAR  
EIF4E CYFIP1  
UCK2 NEK6  
CUL1 FBXO31  
EFEMP2 TP53  
HSPA5 NDRG1  
IKBKB RPS27A  
HBM MESDC2  
INSR PTPN12  
ARSE NDN  
C19ORF50 ZC4H2  
TP53 AR  
CPSF6 KLHL12  
ZNHIT1 H2AFZ  
CDKN2A IKBKE  
EP300 NAP1L4  
HIST3H3 ING4  
PDCD2 USP49  
TBC1D4 TOPBP1  
LAMA5 MUC7  
DNMT1 USP7  
ZBTB7B GRAP2  
CASP9 RNF2  
TBP PAX6  
XRCC6 SGOL1  
TERT YWHAZ  
NDUFA2 FSTL1  
POLR3D POLR2F  
VIM WBP11

SRSF2 CDK12  
YWHAE STAC  
TMCO6 UBQLN1  
USP5 USP13  
RAD23A UBA3  
APP CBF3  
AR MLH3  
TCEA2 FAM190B  
SGK1 GAPDH  
YES1 FAS  
CUL4A KEAP1  
EP300 SMAD5  
MLH1 TXN2  
AHSA1 FTSJ1  
EIF3E DDX24  
DLG4 MAP3K10  
SSX1 FUBP3  
DLG2 DYNLL2  
AGTR1 THOP1  
PRNP MARK4  
KIAA1279 GSTK1  
ALK MAP3K4  
UBE2M MEPCE  
PSMD14 PSMD3  
SIAH2 VAV1  
PGLS EWSR1  
ETV1 EP300  
NUDT21 HLA-C  
CDKN2A WRN  
UTRN DTNA  
HBP1 CD2AP  
RNPS1 USP7  
IL1A S100A13  
ESR1 MTA3  
CTBP1 SIN3A  
DSPP PKP4  
EMX1 PRDM4  
TAL1 RCOR1  
WBP4 HNRNPU  
PHYH TOM1L1

PXN TRIP6  
BCAR3 KHSRP  
UBE2G2 UBE2J2  
TUBB2A ARL15  
TBP FATE1  
KCNB1 KCNV2  
XRCC1 APLF  
MEF2C RANBP9  
MPDU1 SHBG  
SESN2 PRDX1  
MAPK3 ARRB2  
GHR STAT3  
FBLN1 GF11B  
PTK2 SCG3  
KPNA6 STAT1  
DSC1 DSG2  
MCC STRN3  
PPFIA3 PPFIBP1  
FOXO3 YWHAE  
PFN2 DNMI  
CASP9 BIRC3  
NFATC3 TTF1  
PRKDC PLCB1  
RGS12 CXCR2  
DSG2 PKP2  
ARID1A SMARCC1  
SPTBN2 ACTA1  
YY1 PRKDC  
GNB2L1 OTUB1  
PRKCD CYTH1  
RARA NR1H3  
DDX5 TRAF1  
NUDT3 ASB13  
SFXN1 GSTK1  
TRIM37NUDT18  
KCNJ12LIN7B  
CLN3 AFG3L2  
VHL RAB14  
SNRPB COIL  
PARP1 TOPORS

NKX2-1 CCDC59  
CASP9 BIRC2  
PLSCR1 CPSF3L  
RPS27A TRAF6  
C16ORF59 FEZ1  
UNC45A GSTK1  
STIP1 IKBKE  
TUBA1A MAP3K3  
HOXB9 ZNF408  
PTGES3 PINX1  
GH1 CISD2  
HDAC1 CDYL  
PML MAPK14  
SMC2 NCAPG  
RPS27A TBK1  
OMA1 SRC  
PCGF2 UBE2T  
HDAC1 RUVBL2  
LSM7 LSM5  
HCLS1 SH2D4A  
UBE2L3 TRAF7  
CCND3 ATP5C1  
VTN PRKCA  
ACVR2A ACVR1  
CSNK1A1 PRKD2  
STS CBL  
CFTR PRKAR2A  
CD3D CD3E  
CTNNB1 HDAC4  
TPM1 RIPK3  
DAP3 NFKB2  
HDAC3 TP53  
CDC42 BAIAP2  
HDAC1 TCF19  
YWHAE PFDN5  
EIF4B EIF3A  
ACTN1 SRC  
MARK3 NOL11  
GM2A GPLD1  
ZNF331 ZNF182

EIF3H EIF3K  
RAI1 ZNF496  
LSM7 LSM4  
FOS ETS2  
NEDD4L MED28  
SMAD3 SMURF1  
CUL2 ZER1  
FLNB MAP3K4  
RBL1 CCNA1  
TRIM28 PARP2  
TRIO DISC1  
AHSA1 C20ORF24  
CTPS HLA-B  
PFN1 TLE1  
VPS26A VPS29  
CBX8 HAP1  
AKT1 HSPA4  
JUP APC  
PDCD6 TIMM22  
SYNJ1 PPP3CA  
COL2A1 MAG  
SYNJ1 EPS15  
BRAF PRKCE  
RNF40 RNF20  
SOD2 GOLGB1  
UNC119 UBQLN4  
FGF1 CSNK2B  
CRIP2 ATN1  
PTPRA GRB2  
WHSC1 MDM2  
CSK PARD3  
STAT1 PDE4DIP  
CDC37 FBXL12  
STAT1 CCR5  
MMP14 LRP1  
YES1 ABII  
UBE2W BFAR  
ITGB4 ALOX12  
DNMBPCYFIP2  
PLCG1 CKAP5

ARHGAP1 BNIPL  
PTPRG GAB1  
RHOD DIAPH2  
VIM SLC27A6  
PTP4A3 SLC3A2  
DNMT1 UHRF1  
IKBKE AZI2  
TP53 HTT  
PFDN6 MDM2  
DDIT3 ZNF323  
FN1 PDGFA  
MIS12 DSN1  
STAT1 STAT5B  
CASP4 MTHFD1L  
MDM4 UBC  
KPNA3 FAM50B  
PRPF6 RNPS1  
MDC1 USP28  
FH IKBKE  
NTN4 ADAMTSL4  
TUBG1 MZT1  
MDM4 MDM2  
TP53 JMY  
NAB1 POU2AF1  
PIK3CB AGTR2  
NDEL1 DISC1  
IFT20 EXOC7  
PRDX2 MAST1  
ZNF584 LZTR1  
MYC PML  
NTF3 BDNF  
HSPE1 TNFRSF10D  
SMAD9 DSTN  
TCF3 KAT2B  
MAPT RPS6KB1  
IKBKB FANCA  
TNFRSF13B TRAF2  
PIK3CA VARS2  
KIT SH3KBP1  
MTA2 SIN3A

RAC1 PRKCD  
PDXDC1 PHLDA3  
RNF8 ATM  
MTA2 SPEN  
RALA RAP1A  
LMO2 MAPRE3  
ITGB7 MADCAM1  
SORBS3 FLOT1  
MYB MLL5  
MAPK1 ESR2  
ATXN1 BTG3  
FN1 TTN  
VAV1 PRLR  
DEK BAZ1B  
SMARCA1 BPTF  
PTK2B SH2D3C  
FN1 CXCL12  
RING1 CBX3  
PTN WFDC2  
EEF1A1RPA2  
NBN TERF2  
NFKB2 MAP3K14  
HDAC3 PAPOLA  
EPHB2 PTP4A2  
PRKAR2A ARFGEF2  
CDKN1A DTL  
ZNF408 LSM2  
DHX36 PARVA  
CD8A CD59  
PIK3R1 TYK2  
AR PRMT1  
FADD MYD88  
RECQL5 MAPK8IP1  
PRKCA LMNB1  
SNRPB DYNC1H1  
GSN CLIC5  
SMAD4 EID2  
NCOR1 SKI  
RUNX2 YAP1  
NCOR1 SKIL

PHB BRMS1  
UBC SPDYA  
ADAM15 SH3D19  
HSPA5 BCAR1  
ARRB2 ARRB1  
CBFA2T3 HDAC2  
RTKN2 PACSIN1  
ABL1 MAP4K1  
ALB USP37  
PXN GRB2  
TNFRSF1B MYH10  
RRAS NAV2  
FGFR1 STAT3  
STAT3 JAK3  
GTF2I SRRM2  
NDEL1 MBIP  
SFTPB CTSH  
MCAM ATF7IP  
FN1 ITGA5  
KBTBD7 TJP2  
CASP1 PYCARD  
COL4A4 TGFBI  
E2F4 NDN  
IL12RB1 STAT4  
KLHDC10 USP7  
TNFRSF1B MYH9  
ADAMTS4 SERPINA1  
HIP1 PFDN1  
UBC RALBP1  
ADAMTS4 SERPINA3  
KIAA0776 UBE2D4  
EPRS RIPK3  
BAG2 MAP3K1  
SRPR RUSC2  
ADIPOQ ADIPOR2  
TYROBP KIR3DS1  
HGS ITCH  
TGFB2 OSR1  
AURKATP53  
PIAS2 TP53



MED9 MED29  
FN1 FASLG  
XPO1 TOP2B  
FATE1 TRAF2  
RAE1 FAF1  
PRKACA RAP1GAP  
ABL1 DLX4  
IRS4 PRKCZ  
STK38 MOBKL1B  
AR CDC37  
ZSCAN1 CNOT6L  
ITGB2 PRKCH  
CSK LAIR1  
B2M GRB2  
MT2A SHBG  
STK25 SIKE1  
ACCN1 STOML1  
CLN3 TELO2  
REV1 POLI  
USP28 CLSPN  
WASL FBNP1L  
CASP10MAP3K14  
JUP PHB2  
RXRB KIF5A  
XIAP DYNLL2  
RFX1 MAGED1  
KCNH4 ST13  
CD5 POLR2B  
NFKB2 TSC22D3  
MT-ND4 GRB2  
YWHAQ BAX  
MLL3 ASCL2  
GCH1 OSBPL9  
TNFAIP3 APC  
MAPK1 MTPN  
LRRN1 RTN4  
TP73 ASPM  
LIF LIFR  
YWHAZ WWC2  
SF3B3 WWOX

MYC MKLN1  
KPNB1 ING1  
KRT18 CASP3  
SEC24CSEC23B  
ESR1 NR0B1  
CCNT2 HEXIM1  
SEC24CSEC23A  
NID2 COL13A1  
TGFB1 COL2A1  
MAPK1 PTPN5  
PTPN2 KPNB1  
NTRK1 RPS27A  
RANBP2 RPS27A  
ATP6AP2 USP20  
PRUNE2 EWSR1  
HUS1 RPS27A  
CTNNB1 CSNK1D  
WASL PACSIN2  
APOA1 CETP  
SUMO2 UBA5  
SNRPD2 CDC5L  
RASAL3 WNK1  
DDB1 COPS3  
EGFR AKAP12  
MYC ACIN1  
SLC2A4BSG  
TLR3 TRAF6  
NAA38 NAGK  
CTNNB1 CSNK1A1  
NTRK1 GRB2  
COPB2 DDA1  
ITGB4 PTK2  
PABPC1 PRKAB1  
SUB1 CSNK2A1  
APOE CDC37  
CUL4B RBBP5  
PF4 THBD  
YWHAZ CBY1  
EGFR MAP4K1  
DSC2 PKP2

SUMO2 C20ORF94  
MCC CAPZB  
PPP2CBCTTNBP2NL  
PSMC4 KRT33B  
ATP5L TSC22D1  
BRAF MAP2K1  
RBL1 EPHB2  
ESR1 MAPK14  
FKBP2 CDKN2A  
YWHAG DENND4A  
RPS6KA5 MAPK11  
PNRC1 RORB  
F8 VWF  
PLAU CTSB  
MAML2 MAML1  
MYST2 DVL3  
FOS NFKB1  
RNF13 UBE2N  
SPINT2 HGFAC  
HAGH MYOC  
ARPC1B PAK1  
PLK1 GTSE1  
FLNA NFYC  
EP300 PPP2R5C  
EP300 CTBP1  
UBE2I CEBPE  
YWHAG NUFIP2  
CUL5 ANAPC11  
ZNF225 NAB2  
RGS7 GNAQ  
PTPN11 PAG1  
RARB GATA3  
RPL22 RAC1  
OPA1 PTP4A3  
ATM CXXC5  
SMAD7 HDAC1  
PLK1 PLK2  
TFAP2A MAGI1  
UBTF LEF1  
LMNA FYCO1

PSMC2 RPS27A  
MCF2 CDC42  
TBP BRF2  
GPR37 STUB1  
FANCF FANCL  
CDC37 SMYD2  
NCOR1 SNW1  
ESR1 RPS6KA3  
TUBB VAV1  
DLG4 GRIN2B  
DDA1 FARSB  
TDRD6 MAPK6  
NFE2 PHYHIP  
GRB2 ACTA1  
BMPR1B RAB6B  
EPAS1 ARNT2  
YWHAZ C22ORF28  
WWC1 FEZ1  
CUL4A DCAF6  
CLEC4G RNF7  
MAPK9 XPNPEP1  
ERP27 UBQLN4  
SMAD2 GRIPAP1  
CCND3 ATF5  
RET DOK1  
MLH1 LGALS4  
SGK1 PDK2  
SGK1 MAGEA1  
DNM2 MPHOSPH6  
PSTPIP1 RPL35A  
EP300 MTA1  
BRD4 MED24  
CD4 UNC119  
ACTB RAD51  
VIPR1 GPRASP1  
TRIM41 AKTIP  
RBL1 KDM5A  
IRF1 IRF8  
GOLGA3 GOLGA7  
IL1R1 SIGIRR

EPRS RELA  
RBL1 ARID4A  
SETDB1 RNF10  
ATP2B2DLG3  
DAND5 SRC  
LAPTM5 USP13  
ADRA2A PPP1R9B  
NSF EEA1  
DCTN1 BBS4  
PCNA SMARCA4  
PDGFB PDGFRA  
HIRA HIST2H2BE  
EIF4G3 MKNK1  
SRC ASAP1  
CNBP EBNA1BP2  
ATRX LUC7L2  
ZBTB17DIS3  
PTPN6 CXCR4  
SNAPIN KAT5  
RPS6KB1 NEK6  
NR2F6 CAMK2A  
PTPRD PTPRS  
RB1 SPIB  
UBE2G2 CUL9  
FYN PTPRA  
NRD1 POMC  
CASP7 BIRC3  
PPP2R1A TRAF6  
TOP1 FSHR  
DLST MEF2A  
ELAVL4 EWSR1  
ANXA2 FTSJ1  
YWHAB SRSF3  
SMAD2 ARFGAP3  
TUBG1 PDCC6IP  
NPAS2 HESX1  
YWHAG CLASP1  
CASP7 BIRC2  
TEAD1 NCOA1  
TFE3 RPA3

NEDD9 TRIP6  
EPS8 BAIAP2  
ACVR1 CREBBP  
SLC25A11 CLN3  
BRD4 PRPF40A  
CDK9 IGF2BP2  
CTBP1 MECOM  
GMFB RPS6KA1  
HLA-B KCTD12  
DOT1L SIRT1  
TP73 HIPK3  
EXOSC5 PA2G4  
SRCAP RUVBL2  
XRCC6 CDK2  
CHD4 WNK1  
LCK CD3E  
NR2C2 HDAC4  
RORC CHD4  
SF3B1 SF3B2  
YES1 RASA1  
FAS DAXX  
AXIN1 DVL3  
NFYC C12ORF65  
SDHB IKBKE  
ARL6IP5 CCR5  
CDKN2A CDKN2C  
PTH1R SLC9A3R2  
KNG1 CTSL1  
CALCR GPRASP2  
PLSCR1SLC35A2  
CTNNB1 EP300  
MTOR FKBP1A  
STK25 FAM40A  
SKIL SMAD3  
CYB5A CYCS  
ARIH2 UBE2D3  
FOS PSMC5  
ERBB2 PTK6  
CASP2 NLRP1  
GOLGA2 GPS2

FYN GRAP  
ITGB2 EPS8  
EIF4A3 SRRM1  
FANCD2 FAN1  
ATP1A1 EZH2  
ELP4 ELP3  
DEK DAXX  
HDAC1 ZNF395  
MYC MSH6  
PAK1 PAK1IP1  
TNFRSF10C RAPIA  
TP63 INPP5E  
CHM RAB14  
DTNBP1 MACF1  
CDK4 TSPYL2  
PRRC2A RERE  
PRKCA ANXA7  
DDX50 SRRM2  
CD44 TGFBR1  
ATF2 CREBBP  
PML CSNK2A1  
MAP3K7 TUBB4  
NFKB2 TRAF3  
CTBP1 IKZF1  
UBE2L6 RNF125  
EIF2S3 CASP4  
MYB RPS27A  
CD44 MADCAM1  
DNAJB6 GH1  
PLSCR1ADAMTSL4  
AHSA1 EGFR  
PSMB1 POMP  
RANBP9 MKLN1  
APEX2 TRAF2  
SNX4 BIN1  
EMD ACTB  
ESR1 NR2C2  
ATF6 NFYC  
ZNF24 TRIM25  
TP53 MED1

TOR1A LMNA  
LPXN IMP3  
FCGR2C GRB2  
HERC2 DBNL  
PRRC2A SSR3  
GDF11 WFIKKN2  
MUSK DOK7  
APOB BGN  
ATF2 NCOA6  
IGF2 IGFBP4  
LMNA ING1  
SDCCAG3 GIT1  
HNRNPC TRAF6  
YWHAG CYFIP1  
SMAD2 KIAA1033  
CCNA1 PROCA1  
FYN RIMS1  
MAP1B U2AF1  
ESR1 RBBP7  
NCOA2 GMEB1  
SYNJ1 GRB2  
ESR1 PPARGC1A  
MYC KIDINS220  
ACTN2 CAMK2A  
XRCC6 H2AFX  
ZBTB16HDX  
SYNJ2BP PINX1  
CLCN7 OSTM1  
IGF1 IGFBP1  
MYC ARF1P1  
RNPS1 LUC7L  
CSRP2 CSRP2BP  
PML ELF4  
MAP4K4 GBP3  
NRD1 PDYN  
RIMS1 CAMK2A  
RPA2 MCM3  
ZNF263 SCAND1  
SF3B1 SNRNP40  
FYN HEXA



MTA1 SIN3A  
CD247 SLA2  
RAD52 RAD51  
CASP3 GRIPAP1  
ZNF367 TP53  
ADRB2 HTR4  
NR2F1 NCOR2  
RIPK2 RPS27A  
PSMB1 DCP2  
AP2A1 PIN1  
TOP2A RANBP2  
TRAF3IP2 IKBKG  
TP53BP2 WWP1  
SMAD9 QARS  
BCL2 PIN1  
FYN JUP  
APBB1 ABI1  
ADAM12 SRC  
DCTN1 HAP1  
MED26 POLR2B  
AR RELA  
TH PRKACA  
PRNP KIAA1191  
DHX9 TRAF6  
USP45 GLTSCR2  
PPFIA3 PPFIA2  
SYN3 SYN2  
CRB1 MPP5  
USF1 TRRAP  
CDK1 CSNK2A1  
CCNDBP1 SYF2  
S100B STK38  
LCK G3BP1  
FGF3 FGFR3  
IGF2BP3 HNRNPA1  
ENO3 TRIM63  
PML TGFBR1  
TBL3 NR2E3  
YWHAB MST1R  
MYL2 PAK2

VEGFA CTGF  
ITGB2 COPS3  
ACCN1 ACCN3  
CAPN1 PSEN2  
SNRPD3 LSM7  
RPS27A OTUD7B  
IVL LOR  
PSAP BRCA1  
ARF6 GTF2I  
VAV1 AOC3  
EIF4A3 MAGOH  
CADM4 CNKSR1  
STK19 SP3  
CASP1 NOD2  
DARS NDRG1  
USO1 GSTK1  
NEBL ACTN1  
USP11 GTSE1  
ACTB PDLIM5  
MARK3 SAAL1  
CDC42EP2 SEPT6  
NAA16 NAA11  
SNAPIN CNO  
PPP1CA PPP1R9B  
PDGFRB ATP6V0C  
PCBD1 TRIM5  
CCNA2 CDK2  
PPP1CCY WHAZ  
USF1 HCFC1  
MED1 MED23  
ACTN2 TNN  
GNA12 S1PR5  
MTNR1A PDIA6  
APOA1 APOC1  
PCBP4 RNF138  
VHL RPS16  
YWHAZ MAP3K2  
HIST1H2BB CHD1L  
CCBP2 CCL19  
NR3C1 CEBPB

DMD DGKZ  
SRC CBL  
TNFRSF10B FADD  
CNIH4 PRKAB1  
SELP SELPLG  
RBL2 BRF1  
OASL MBD1  
DVL2 RUNX2  
PPP2R1A PPME1  
PLCG1 YTHDC1  
TRPV1 TRPV2  
ADAM17 MAD2L2  
CA2 SLC4A8  
HSP90AB1 PRKDC  
CHD3 IK  
ICAM1 SLC3A2  
SUPT7LTAF9  
DAB2 MYO6  
GBAS GABARAPL2  
NFKB1 IRF8  
DLG1 LIN7C  
TNFRSF10A TNFRSF10B  
FLT4 PTPN11  
PPP2R5D SGOL1  
YWHAB STK38  
ACTN2 DISC1  
PLA2G4A ELF3  
TGFB1 ITGAV  
EIF4G1 PAK2  
SDCCAG8 TSC1  
IARS GSTK1  
PTPRF PTPRA  
NFYA APPBP2  
CCT8 PPP4C  
SRC PLCG1  
BAG6 CTCFL  
TNNI3 TNNT2  
MEF2C MBD5  
CDC45 PPP4C  
NFKB1 HMGA2

EEF2 MAPKAPK3  
NKX2-1 CREBBP  
ADRB2 RPS27A  
PRKCB CSF2RB  
MYBL2 CDK9  
SSFA2 YWHAG  
DAB2 PRKCD  
MC4R MRAP2  
RGS9 GUCY2D  
PTN MKKS  
DOCK1 ELMO1  
MAP2K6 TRAF6  
MYC EXOC4  
FHL2 ZNF182  
IRF3 IRF7  
DNM1 FNBP1  
CDK4 CDT1  
RAP2A RAPGEF6  
CSF2RB STAT1  
CASP3 MAP4K1  
CSNK2A2 PPP1R2  
PPP1CC CDC34  
HLA-B GANAB  
CRHBP UCN  
S100A8 MOBKL1B  
CCL22 VCAM1  
OCLN RAB8B  
LDOC1 SMARCD1  
ALDOB BBS4  
KRT18 TCHP  
BIRC2 TRAF2  
GNA14 ADRB2  
SMAD2 CXORF26  
SMAD2 TRIM62  
SMC1B SMC3  
OXA1L MRPL13  
CSF2RA SDC2  
UBE2I RNF10  
PARP1 TOP2B  
SRC CBLC

RPF1 UBE2D2  
NR3C1 PRKACA  
FAS RIPK1  
SAP18 YWHAB  
PELI3 MAP3K14  
ETS1 PAX5  
MAPK14 CCDC14  
GABARAPL2 ATG4B  
PSTPIP1 PTPN1  
ALDOAHSP90AB1  
ADRB2 GRB2  
FN1 PRKCH  
RET FRS2  
THRA PML  
CRLF1 CNTFR  
APBB1 HNRNPK  
DFNB31 MYO15A  
CKLF WWP1  
CRK SH3BP1  
CEBPB SPIB  
CTNNB1 PICK1  
MLH1 PTP4A2  
LAMA4 ATF7IP  
USP9X NEK6  
KPTN AUP1  
MYST2 PHF15  
RQCD1 MAP3K3  
AP2A2 NUMB  
VIPR1 CALM2  
ATG9A FAM48A  
FBL DDX17  
ATM RRM2B  
PNRC1 ESR2  
TGIF1 SIN3A  
TGM3 USP53  
COL4A2 OSM  
RPS27A ERBB4  
MYST2 RGL2  
JAK1 PLA2G4A  
SMAD1 HIPK2

PTP4A3 SEC63  
TERF2 MCPH1  
HLA-B LAGE3  
PRKRIR EIF2S1  
ATXN3 RAD23B  
DOK2 EGFR  
CDK1 CCND1  
ATXN3 RAD23A  
GNG13 GNAT3  
SRSF7 CCNL2  
YWHAZ FAN1  
OXA1L MRPL20  
CDK9 NR2E3  
COPB2 RGS4  
EP400 TRRAP  
GUCY2C PDZD3  
ATN1 FBLN2  
SKIV2L2 EXOSC8  
PFDN6 SPATA2  
HNRNPA3 TNIK  
HSPD1 WNK1  
TAF9 EHBP1  
CDH1 JUP  
HUWE1 CDKN2A  
FYN CNN1  
PIK3R1 SLC9A2  
HEY2 HDAC9  
VAV2 RHOA  
MLH1 WDR61  
SMAD7 SMAD4  
MMP14 ACTB  
GH1 RPS11  
GIPC1 SEMA4C  
YWHAB RNPS1  
FYN GAD1  
TAF10 TRRAP  
TRIM24 SUMO1  
RAD17 CLSPN  
DOK2 ABL1  
EIF1B SEPHS1

SYNJ1 TNK2  
YWHAQ MARK2  
SUMO2 ZMYM4  
TNFRSF1B MYO6  
MLH1 YLPM1  
TSG101 NDUFA13  
TP53 TAF1C  
MAP2 SRC  
BTF3 PAK2  
STAT6 NMI  
RIPK2 SMURF1  
KPNB1 NUP50  
CCT5 RPAP2  
C11ORF61 STRN4  
NR3C1 MAPK15  
LRP2 LRP2BP  
HLA-A UGGT1  
TP53 TAF1A  
RAB11B IKBKG  
EFS NCK1  
H3F3B DNMT3A  
CD36 VLDLR  
PKLR CLEC4G  
PTP4A3 TMCO7  
HIST1H4I SETDB1  
DPF2 BCL7C  
HLA-B GFPT1  
RARA RXRA  
INSR STAT5B  
APOE MAPK6  
EP300 SMAD4  
ITGB1BP3 LRP12  
CDKN1B DDB1  
RAB3B RPH3AL  
UBE2I ZCCHC7  
CRKL EVL  
RAB3B TGFBR1  
HBXIP EEF1A1  
H3F3B CABIN1  
SMAP2 ING3

EIF3F PTN  
LTA TNF  
NPBWR2 NPB  
EEF1D MAP1B  
FHL2 REV1  
SNAI1 UBC  
NFKB1A SPG11  
PLXNB1 AKT1  
ACTL6A ING3  
TP53 NCOA2  
POLA2 EZH2  
COTL1 PRKAB1  
MAGI2 AMOTL1  
SUMO2 UBE2I  
SMAD9 MTMR10  
TFAP2B CITED2  
TNF SCG2  
IL10 IL10RB  
CSNK2A1 NOLC1  
NFKB2 NR5A1  
FYN ORC1  
EMD FATE1  
CNOT10 CNOT6  
DDB1 ZNF277  
ETS1 STAT6  
LDB2 BRCA1  
RAD9A CLSPN  
SIAH1 RBBP8  
EIF4E EIF3B  
AR IFI16  
AR HIF1A  
TFAP2B CITED1  
TP53 ERCC6  
CHMP4C PDCD6IP  
SNRPB STRAP  
RAP1A RUNDC3A  
TRIM28MEPCE  
FYN PTPRF  
ZNF408 ZNF182  
UBE2K MKRN3



CCL5 SDC4  
CBFA2T2 NCOR2  
PDGFRB ARAF  
PABPC1 IKBKE  
SGK1 PSMD6  
LAGE3 OSGEP  
HNRNPA1 UBR1  
IRF3 CREBBP  
USP45 SRBD1  
HNRNPA1 UBR2  
TBP TAF2  
SKIL SETDB1  
KLC1 MAPK8IP1  
TRIP6 MOBKL1B  
USP18 IKBKG  
OMA1 RELN  
CSK G3BP1  
PRKG1 ITPR1  
SYVN1 UBE2J1  
TRIM28SPG7  
PAICS LNX1  
CD4 KCNAB2  
CTSD IGF2R  
IKBKB MAP3K14  
MAP1LC3C TBC1D2B  
DPF2 ZNF182  
PIK3R1 GABBR1  
MUTYH LRSAM1  
ACTB CPNE2  
CHD4 IKZF4  
S100A6 CACYBP  
DERL1 SEL1L  
HMGB1C14ORF1  
CLINT1MAP1LC3A  
EIF4G3 USP10  
NAA38 LSM7  
AQP1 TRIP6  
FASLG DNMBP  
MEIS1 HOXD9  
TP53 RRM2

SNX2 ACVR1B  
ABP1 DNM2  
YWHAZ RAPGEF2  
EP300 NFATC2  
BMPR1B KLHL1  
PER2 CRY2  
HMGA1EWSR1  
SH2D1A GRB2  
ADAM12 YES1  
PLAU CTSL1  
TP53 TRMT11  
CCNA1 PSMD6  
NTRK1 RAP1A  
COPS6 FEM1B  
GTF2H1 POU2AF1  
CD44 DMP1  
YWHAZ FAM65B  
MAP3K10 DNM1  
OSGEP OPTC  
MYC YY1  
APC S100A4  
IKBKB TRADD  
SPRY2 KRTAP4-12  
TYK2 STAT1  
DGKA IL2  
DEC1 TOLLIP  
FN1 TAC1  
CAPN2 NMT1  
FANCC ZBTB32  
FLNB ATF7IP  
TP53 ATF3  
CDK1 GADD45A  
SH2D1A LY9  
IQGAP1RNASEL  
CTBP1 HIC1  
NXF5 NXF1  
CD9 IGSF8  
UBE2I NIN  
PRKCG YWHAG  
TFCP2 KIAA0090

MLL2 CXXC1  
VEGFA EPHB2  
PLSCR1NTN4  
MED8 MED10  
NGFR MAGED1  
CRK KCNIP3  
HNRNPH1 NDRG1  
SKIL SNX17  
ITGB3BP INSL6  
ELK3 MAPK14  
ANXA5 ITGB5  
ATM STK11  
PRNP PPP1R14A  
MAPK3 GMFB  
MCM3 LZTR1  
TCOF1 WDR48  
TLX1 PPP1CB  
RAB7A IKBKE  
ATP2A2 IRS1  
E2F1 LEF1  
CAPN1 PTGDS  
GUCY1A2 RPS27A  
EGFR RASA1  
DVL2 U2AF2  
DMD SNTB2  
EIF3F EIF3I  
TG APCS  
SIPA1L1 USP11  
NFKB2 PSMD2  
CATSPER1 MDFI  
DMD SNTA1  
KRT85 OTUD4  
ABCD3 C20ORF24  
IKBKE PFDN2  
PML HDAC7  
TAL1 TRRAP  
DCTN3 DCTN1  
BCAR3 VCP  
RUVBL2 RUVBL1  
ESR1 RNF14

MPRIIP MAP3K3  
FYN ADAM15  
PLAUR LRP1  
SQSTM1 TRMT61B  
BCL2 TP53BP2  
HNRNPK YWHAZ  
FYN IL2RB  
BCL7B GPN1  
CHEK2 ATR  
ARF1P1PLD1  
CTBP2 ZFPM1  
CEP78 SH3BP4  
FYN UNC119  
SIRT6 ELF5  
JAK1 IL3RA  
G3BP1 SND1  
IKBKB NFKBIB  
MET CBL  
TRIM25UBE2Q2  
CAV1 NEU3  
HSP90AA1 YWHAZ  
GNAT1 F2R  
ALDH1A2 UBE2D4  
CREB1 MAP4K5  
ATP2B2PDZD11  
YY1 TAF7  
DDB2 TOPORS  
CDK9 MLLT1  
PIK3R2 ERBB3  
TRAF5 TNFRSF8  
STRN3 FAM40B  
CCDC85B DOK5  
ITGB1BP1 LRP1  
PLAU SERPINB6  
CCT5 SRRM1  
SMAD1 GMEB1  
ASAHI SETDB1  
IL3 CSF2RB  
IKBKB TP53  
SURF4 PTP4A3

TAF10 GTF3C5  
HDAC1 SUDS3  
PPP1R8 C14ORF1  
TFAP2A PPARG  
CSNK2B CSNK2A1  
PRKACA LRP1  
PAICS CHD3  
PIK3R1 HCST  
KALRN GF11B  
APOA1 PON1  
MCM7 MBIP  
ZW10 BUB1  
TCF3 RUNX1T1  
NKX2-1 GATA6  
MECP2 SMARCB1  
SUMO3 HSF1  
F2RL2 CRK  
SLC2A4DAXX  
XPO1 MTA2  
CD6 ALCAM  
KIF3C SUMO1  
PABPC1 HNRNPD  
BAG4 HSPA1B  
POLR2H NFKBIB  
GSTM3 TRAF6  
IKBKE TRMT112  
LCK CD28  
HDAC2 IKZF4  
GIT2 PCLO  
EPS15 MDM2  
TAF4 TAF9  
ERCC8 COPS6  
RGS14 RAP2A  
CACNA1A CACNB1  
TLR4 BTK  
RAB14 INPP5F  
RPS27A TRAF1  
DOK2 SHC1  
PSMC5 PSMD13  
UBE2U BFAR

CCNK CDK18  
RPS19 CNBP  
FYN CD2  
LRP8 SNX17  
PLEKHF2 MEAF6  
CCK CCKAR  
CCK CCKBR  
DHX15 YWHAG  
PNP CCDC90B  
NIF3L1 TSC22D4  
SRC DAPPI  
HTR2C APBA1  
RELA TUBA3C  
PTMS RXRB  
TCEA1 SF3B2  
ESR1 UBE2I  
LUC7L3 YWHAG  
RNF10 UBE2D4  
VHL CALM2  
UBE2D1 POLL  
ASGR2 LASS2  
ABL1 PRKDC  
CCNT2 CDK9  
ABL1 ST5  
TRIM23 TRIM31  
GABARAPL2 RPL36  
FEN1 DDX11  
NR3C1 DDX54  
ABLIM1 ACTG1  
AIFM1 TRADD  
PJA2 UBE2D1  
INSR PTK2  
VTN ITGAV  
USF1 SMARCA4  
SART3 MEGF10  
AR STAT3  
RABIF UTP14A  
SRC RALGAPB  
ALPP ALPPL2  
FYN FCER2

TOX4 ZNF512B  
C12ORF12 MDFI  
RAP1GAP MEX3B  
WARS MDH2  
RIPK2 NOD2  
ABL1 CDKN1B  
VAV1 RAC1  
CYP27B1 GABARAPL2  
PMCH PCSK5  
KRTAP4-12 THAP7  
EIF4G1 G3BP1  
AKT1 SMARCC1  
BRD2 NFYC  
CDK1 CCNB1  
APEH TMEM62  
PAICS CEP76  
EGFR HSPA1B  
FLNA PTK2  
HTT PRPF40B  
VIP MME  
TFAP2A CITED4  
YWHAZ TLN1  
RAB4A RAB11FIP1  
KLC1 MAPK8IP3  
MED20 MED29  
INHBB ACVR1B  
CASP3 CASP10  
HLA-B SAR1A  
PPFIA3 PPFIBP2  
NRIP1 HDAC1  
HNF4A SUB1  
KLF4 DAND5  
IL1R1 IL1RAP  
PDCD6 GOLGA2  
RRAD CSNK2A1  
THNSL1 UIMC1  
NAA10 IKBKE  
DUSP16MAPK8IP1  
GRAP2 YWHAE  
GDF9 SERPINB9

AKT1 KHSRP  
APOA1 TTR  
TCEA1 EAF2  
FXVD3 SERBP1  
ACP5 RPA2  
GH1 RHOC  
MYST2 WDR33  
BLM RAD50  
TRAF2 TBC1D17  
PTP4A3 DDX20  
RFX1 SMAD1  
UBE2H TRAIIP  
PDCD6 YWHAZ  
CCDC85B EZH2  
UBE2D3 ZNRF2  
LYN ABI1  
EPB41 U2AF1  
AKT1 BAD  
HADHA MAP1LC3A  
GABARAPL2 RABGAP1  
MBP CDK12  
LCK KIT  
CCBP2 CCL13  
SRSF5 PPARGC1A  
PIK3R1 LAPTM4B  
RPS27A TRIM32  
PLCG1 ABI1  
TUBB NFKB1  
TFAP2A SH3BP4  
SDHB PIK3R5  
LRRC1 KIAA1377  
DPEP3 HDAC1  
STAT1 PRKCD  
IKBKE TBK1  
RAP2A MLLT4  
ZNF24 UTP14A  
RAB27A RPH3AL  
ATN1 LTBP1  
RAB3A RAB3IL1  
RPL35ASH3GL3



TOP1 NKX3-1  
CRK PALM2  
KPNA1 CSE1L  
ELN FBLN1  
RET NRTN  
VCP UBXN4  
TNFAIP3 TBK1  
SLC22A24 EWSR1  
MAP3K7 TRAF6  
NCOA2 NCOA3  
WARS DDA1  
EP300 HDAC1  
TP53 MED17  
MET PTPN1  
BUB1 AP4B1  
MMP10 HAPLN1  
MATN2 COL4A6  
AP4M1 CACNG3  
YWHAE CGNL1  
TRIM29FBXL19  
NFE2 ITCH  
STK16 RPIA  
CTNNB1 CTNNBIP1  
HSP90AA1 PRKCD  
GNL2 USP36  
HDAC6 PLAA  
HR RARB  
HR THRA  
PFKFB2YWHAZ  
PRKCQ STK39  
UCHL3 ATXN7L3  
PARP1 MEPCE  
WDR33 UTP14A  
YWHAZ WNK2  
VCP NDRG1  
FN1 TNC  
RIMS1 BSN  
JUP PKP2  
SHC1 GAB1  
DYNC1H1 DISC1

RPS11 TH1L  
HIST1H2BB KAT2B  
CRK DLGAP4  
PAICS GNAS  
PAK2 SH3KBP1  
TRIM23ZNF581  
SERPINA1 SSR1  
NCOA2 PIAS3  
MDH2 PSMD4  
GRIN2B EXOC4  
PLSCR1ATN1  
ILK ILKAP  
HLA-B MCM6  
TAPBP HLA-A  
KIAA1267 MYST1  
CTNNB1 SALL1  
PHF21AHMG20B  
PTP4A3 ATP6V1H  
CASP3 STK24  
IL2RG PTPRJ  
SOAT2 TNIK  
SIN3B ZBTB4  
ST13 VAV2  
MAGEA4 TRIM69  
ADCY5 PRKCA  
FUS ZMYM2  
GH1 CALM2  
IRF3 TANK  
SRC SKAP1  
FAM40A STK24  
MSN ARHGDIA  
CRK EPB41L3  
PTP4A3 IPO11  
NOTCH2 LFNG  
HNRNPH1 RQCD1  
TRIO PLCG1  
NEB TTN  
DENND4A SERTAD1  
RANBP2 INSL6  
FGF2 FGFR1

FYN CRK  
SUPT5H CDK9  
PTN TAF1D  
CEACAM8 CEACAM6  
EP300 OLIG2  
RNF13 UBE2D3  
ITGB1 TENC1  
PSMD6 UBAC1  
EMILIN3 CXXC1  
LUC7L3 SRPK2  
SRC TRAT1  
FYN PRKCQ  
HLA-A RPS27A  
EGFR SLC3A2  
TUBB Bmpr2  
KRT18 CCDC85B  
VIM CASP3  
SF3A2 DDX46  
RPS15ANFKB2  
CLU TGFBR2  
NFE2 CREBBP  
PRKACA CUL5  
GADD45A DCTN2  
ATG12 EIF3A  
POLR2G USP45  
PSMD10 USP14  
IKBKE DSTYK  
PRLR RPS27A  
HMGB2TRAF6  
STX5 INSL6  
BTG2 CNOT6L  
BRCA1 FAM175A  
LPHN1 APC  
MAPK7 PTPRR  
CLCN5 MAGI1  
PSMB4 SMAD1  
MAX TBC1D9B  
MAPK3 CIITA  
KRT15 WAC  
STC2 CARHSP1

TUBB4 MAP3K8  
EGFR CSK  
ZNF24 ZNF434  
SART1 SUMO1  
FKBP6 HSP90AA1  
EP300 SNW1  
NGFR BEX1  
SSBP2 IL1F5  
EIF3G EIF3K  
ERBB2 PTPN11  
FSHR CANX  
HLA-A LILRB1  
ESRRA GTF2B  
XRN2 RAPGEF2  
HGS SF3B3  
HCFC1 ASH2L  
MAGEA11 C18ORF54  
TGFB1I1 PTK2B  
EDN3 EDNRA  
SF3B1 IKBKE  
GTF2A1 GCN1L1  
MAP2K6 MAP3K4  
TXN FST  
DNAJB6 WNK1  
EP300 NEUROD1  
TAF10 ELAVL1  
EP300 TDG  
ATP5C1PNO1  
HLA-B LRRC59  
YWHAZ CDK18  
RPS27ANKD2  
SUMO1 CASP8  
SUPT5H PPP2R2D  
HCFC1 PPARGC1A  
NR1H4 PPARGC1A  
EGFR PTGDS  
DAND5 RNF4  
MYST2 HIST1H4I  
TAF1 TAF2  
TP53 MLL

CD3D DERL1  
RIBC2 NINL  
NOP56 FBL  
C1QA FN1  
CUL4A AMBRA1  
APBB1 EVL  
NTRK1 GIPC1  
GOT2 PACSIN3  
SCN5A DLG2  
ATF2 COPS5  
ARRB2 MRPL44  
CTSD CTSB  
ORC2 CDT1  
EFNA2 EPHA3  
SMARCA4 SMARCE1  
CCNE1 REL  
EPS8 ABI1  
TUBB B4GALT1  
UBE2D1 XIAP  
EGFR PCNA  
PSMD3 GH1  
NSF PTPRK  
SRSF1 CDK12  
INHBA ACVR2A  
GRB2 TRIM39  
SMC2 NCAPH2  
EFNA2 EPHA2  
TXNL1 CDC42  
UBE2L6 RBCK1  
MED20 MED9  
PPM1F MARS  
NEK9 MAP1LC3C  
RAB4B RABAC1  
GATA4 NFATC4  
L1CAM RDX  
PRKACA STMN2  
CALCR CALM2  
CCNA1 KLHDC9  
PPP2R1A STK24  
SKIL NCOR2

DLG4 GRIK2  
NBN RFC1  
GABARAP STK4  
HIP1 HTT  
VSIG2 YWHAZ  
RAF1 AGTR1  
PRKD1 HDAC7  
CENPB NUF2  
ANXA2 GRB2  
U2AF2 C1ORF190  
SMAD2 SORBS1  
CUL4A CRBN  
PIM1 SNX6  
SNRPD2 WDR77  
VIM IVNS1ABP  
DOM3Z EXOSC10  
KRT15 TCHP  
UPF3B RBM8A  
FLNA USP45  
TPR SUMO2  
CBL RPS27A  
ALDH3A2 MAX  
CEBPB NFKB1  
ERLIN1 TRAF6  
FYN MAPT  
U2AF1 NXF1  
EZR ICAM3  
NTRK2 SHC3  
MAPK1 PRKCE  
ARHGAP18 MPP6  
RAF1 LCK  
NR2F1 LGALS12  
MPDZ OR3A1  
CDK1 PLEC  
PSMD11 NFKB2  
CBL GRB2  
HCFC1 USP53  
EPB41 RANBP1  
PTP4A3 XPO7  
MED7 PCBD2

TACC1 LSM7  
NR4A1 PHIP  
HSPD1 SRRM2  
NR3C1 EP300  
LMNA NARF  
TGFB1 SAMD8  
PLCB3 PARD6A  
GH1 ADRM1  
PCBP1 QKI  
TNFRSF1B TUBB2B  
RAF1 FYN  
KLHL9 KLHL13  
CAD YWHAZ  
FYN GRB10  
ZRANB1 TRAF6  
MAPK3 STMN2  
SRRM1 ASB7  
PPARG MAFF  
ATP5A1 YWHAZ  
MYCN CDKN2A  
PRLR PPIA  
GH1 GDI2  
PRKCG CHAT  
KNG1 THBS1  
RASSF8FRMD6  
ZNF225 PITX1  
NFKBIE HSPA1L  
SNUPN SNRPB  
SMAD2 BTBD2  
VAMP1 STX1B  
PDS5A CDCA5  
MED22 GOLM1  
ATXN1 KCNAB2  
PHEX FGF23  
LDHB SUMO4  
MRPS31 USP42  
SGK1 PFAS  
TSHR CALCR  
ZFP36 HDAC7  
PTPRS UTP14A

IL6R IL6ST  
RAB37 EWSR1  
PPP1CAPP1R10  
ITGB2 ICAM5  
HDAC3 TBL1X  
MAPK6 MED19  
STAT5B ERBB4  
USP13 KCTD10  
SOD2 DYNC1LI1  
KHDRBS1 TNS3  
UBE2I HSF2  
KPNA6 TAF9  
BMX PAK1  
MITF LEF1  
NTRK1 PTPRG  
WDTC1 USP3  
GRAP2 PTPN23  
HOXC8 DLX2  
UBC PSMD4  
NOTCH1 GF11B  
PPFIA4 PLCG1  
ANXA2 CTSB  
SHC1 ARHGEF3  
RAF1 LRPAP1  
NTRK1 PTPRB  
EPB41 RAB11B  
PRKD2 HEY1  
SIN3A HEY2  
RUNX1T1 PRDM14  
GABARAP FKBP4  
A2M RHEB  
TAF5L CEBPE  
NRP1 SEMA3A  
SMAD2 GFM2  
NPM1 CDK2  
UBE2G2 RNF168  
PSMD6 ATAD3A  
RHOQ GOPC  
FGF3 FGFR4  
PI4KA PITPNA



CBX3 HIST3H3  
PCBD1 NUDT18  
PPP4C TTC34  
RPS27ACDK5R1  
UBC ADRM1  
TP53 NEDD8  
RPS27ANEIL2  
RAF1 INSR  
TSHR GNA13  
PABPC1 EIF4A2  
NHLH2 LMO3  
GRIK2 PICK1  
SAP30 BRMS1L  
CREB1 ZNF451  
UTRN PIK3CG  
SET TNIK  
AIRE TOP2A  
C3 CFP  
TRPV5 EWSR1  
GPR37 PARK2  
YWHAB RPS6KA1  
ACVR2A MAGI2  
ARFIP1 ARF3  
TAF10 TAF6L  
EP300 YAP1  
UBC VCP  
SKP1 FBXO33  
BCL2 BIK  
TP53 STK11  
SUV39H1 RBL1  
VIPR1 GNAS  
EIF1B PSMB3  
MYO1BRIPK3  
EP400 RUVBL2  
CIB1 PLK2  
PAFAH1B3 PLEKHM1  
PRNP FAM64A  
TRAF2 SMURF2  
NUDT21 CPSF7  
TGFB1 RAB38

LCN1 KHK  
NEK6 SMC3  
SLC2A4EHD2  
UBE2L3 PINX1  
HTR2A RPS6KA3  
STX11 TAF6L  
GNG2 GNB4  
SMAD3 ITCH  
RB1 SNW1  
RB1 DGKZ  
PAR6B PAR6A  
MIDN MAP4K5  
HRAS RAP1GDS1  
FOX2 PAK1  
TGFB1 RAB25  
LCK LCP2  
FYN NEK8  
HIPK3 HEYL  
PTPRC DPP4  
TRPC1 TRPC5  
DAND5 SHC1  
STC2 POLR3F  
RHOA KTN1  
CD74 CD1D  
GNG2 SMURF2  
SOD2 KIAA1549  
PHC1 PHC2  
LASP1 MDFI  
PTPN1 CSNK2A1  
GNG4 GNB2  
BRPF1 PBXIP1  
GNG4 GNB1  
ERBB2 RIN1  
EIF4G1 EIF3I  
CUL5 ASB6  
TPST1 GP1BA  
RXRB CACNA1B  
WWP2 USP7  
ABCD3 PELO  
PRKCZ WWC1

CLTC INPP5F  
RB1 HDAC1  
FGFR1OP2 STK24  
TRIM29DMRT1  
DTNB SNTG2  
GNAZ NUCB1  
PTP4A3 GGT7  
HADH UBA5  
XPO1 MEPCE  
RPS6KB1 MTOR  
CDK2 PPP1CC  
NUP107NUP85  
GP1BA FLNB  
RPS6KB1 PIK3CA  
SLC38A1 KAT5  
CRK AKAP6  
S100A10 COPS6  
HOMER1 C1ORF116  
RAB33A RTN3  
IKBKE RAB21  
DHX9 DPEP2  
DLST OGDH  
FYN CCR10  
COL8A2 COL8A1  
BSN UNC13A  
ATM MED1  
SOX10 SUMO1  
CHD1 NCOR1  
TRAF3IP2 TRAF6  
CREB1 ZMYM2  
FANCC FANCM  
PAX6 WNK1  
PIM1 ABCG2  
MUM1 PROX1  
PRKACB RYR2  
RELA TP53BP2  
F10 SERPINB6  
BECN1 ATG14  
CD226 PVRL2  
IKBKE C14ORF1

RASA1 PTK2B  
EIF1B TPT1  
TOMM70A HSPA1B  
ARHGEF7 NCKIPSD  
ZBTB25COIL  
SMAD2 ABTB1  
PPP2CARACGAP1  
GOT2 TNIK  
MAPK8 PAX2  
RING1 CBX8  
MED1 MED25  
TCEA2 TRAF2  
ZBTB5 ST3GAL3  
EPC1 ING3  
SPI1 CEBPE  
EGFR MAP2K1  
ZBTB16PSMD2  
EIF1AX PINX1  
RBMX RB1CC1  
PLAU LRP2  
PAEP XRCC6  
OXSR1 SUMO1  
RAB5A GGA3  
TNFRSF1B ACTG1  
TP53BP2 MRPL20  
FBL PRMT6  
TEC PTPRK  
UBE2D3 MIB1  
SIN3A DPEP2  
YWHAZ DDB1  
H2AFJ ATF2  
DNAJB6 TP63  
EIF4EBP1 UBAC1  
ATIC ELF3  
PTN UBQLN4  
MAP3K10 KIF26A  
PRKCQ MALT1  
MDM2 CTBP1  
TNFAIP3 YWHAH  
C1QA C1QC

C1QA C1QB  
FLNB NFKB1  
SETDB1 PIAS4  
WBP4 PABPC1  
SIN3A DNMT3B  
GNAL SPATA2  
SHC1 LTK  
KPNB1 TPX2  
AP1B1 KIF13A  
COPS5 COPS4  
HDAC4 BRMS1  
MAP2K3 PLCB2  
RPA1 RB1CC1  
CIT DISC1  
MAPK3 PXN  
MAP2 PLEC  
STMN1 MAPK3  
RNF130 FGFR3  
USF1 KAT2B  
HNRNPM YWHAG  
WDR48 AHCYL2  
SLC9A3R1 TBC1D10A  
DEPDC1B MCM2  
SMAD7 SMAD6  
CLDN1 TJP2  
HGS PPP1R7  
FGR SRC  
EGFR FKBP4  
HOXA1 MDFI  
PGK1 HIF1A  
EP400 RUVBL1  
USP6 ATXN7L3  
C17ORF42 KBTBD7  
GRIA1 PICK1  
XPC DDB1  
NRIP1 FHL1  
RYK EPHB3  
IKBKE NUDT5  
TADA3 ZNF7  
SHC1 GRAP

SKIL HEY1  
FYN MKI67  
NTRK1 ACP2  
KLHDC5 UBQLN1  
TRA2B SREK1  
ARID4B HDAC2  
SATB1 KAT2B  
ORC3 RPS27A  
CXCR2 ARRB1  
TP53 RAD23A  
FOXO1 SIRT2  
SRGAP2 ITSN2  
ORC3 GRB2  
CHEK2 RAD50  
GLUL HTR2A  
GTF3C2GTF3C3  
SH3GLB2 SH3GLB1  
RBBP5 ZNF335  
TP53 EFEMP2  
GTF3C2GTF3C5  
TGOLN2 FYN  
MAP2K4 MAP3K14  
RALB EXOC2  
AR SLC25A4  
HGS RSU1  
CFLAR FAS  
SMURF1 ASH2L  
TSC22D1 MMS19  
SKI MECP2  
ARPP19IKBKG  
NTRK1 PTPRO  
INSR PRKCD  
P4HB TRIP6  
CRYAABCL2L1  
LYN GAB3  
CREB1 MTF2  
WDR48 NAF1  
IFITM1 CD19  
RBM39 SRRM2  
TGFB1 FN1

MYL1 ACTA1  
ZNF408 SAP30BP  
PRKDC SIRT6  
SRC KCNA5  
NEO1 NTN4  
SERPINC1 SDC2  
ADRA2A EIF2B1  
MCM7 GABARAPL2  
CRK PDIA2  
RAB10 RIMS1  
RGS10 ACP6  
IRAK1 TAB1  
POLR2G MED9  
CIRBP SF3A2  
IL7 IL7R  
HNRNPR SF3A2  
AXIN1 CRMP1  
ESR1 CCNH  
SHC1 MAP4K1  
ESR1 MNAT1  
SERPINE1 KRT18  
RAB10 TRAF6  
USP1 DSG1  
EPHB6 SLC38A1  
CDKN1B YWHAE  
TGFB1I1 GIT2  
RAPH1 ENAH  
IKBKE SIKE1  
CR2 CR1  
BRD4 MED17  
PVALB ITGA6  
DLL1 PSEN1  
AIRE HSPA4  
PRPF40A FMNL3  
CCNT1 GRIPAP1  
MAGEA11 DNAJC10  
DDB1 DCAF10  
SIAH1 BAG1  
POU2F1MNAT1  
EEF2K RPS6KB2

RPS6KA5 STK11  
EGFR EPPK1  
RARA RUNX1  
NEDD9 SH2D3C  
FBL COPS5  
FRMPD4 STK36  
PIGA PIGY  
IL6R SRC  
S100A8 UNC119  
ACVR2B TGFBRAP1  
NOTCH4 DLL4  
SDC4 PXN  
SH2B2 NTRK2  
COL8A1 ADAMTSL4  
TBC1D5 AP2M1  
NUMB PRKCZ  
TNIP2 SMARCD1  
PTK2B STAP1  
PRSS23 PPIA  
PTN C9ORF82  
BAG6 TOMM20  
ZFYVE9 DAZAP2  
CHRNA1 ITGA7  
EIF3H SRRM2  
HNRNPC MEPCE  
MYH7 DISC1  
CDC42 CABLES1  
STAMPB UBC  
PLEKHF2 GPBP1L1  
IKBKE C6ORF125  
FANCA CCT3  
DLGAP3 DLG1  
ORC3 SYK  
ORC3 ZAP70  
SMNDC1 PPAN  
ICOSLG ICOS  
MYBL2 E2F4  
ACTC1 MYLK  
RAB3A DMXL2  
AKT1 ITPR1



NFKBIA HSPA9  
YWHAZ SIK3  
NCOR1 ZBTB16  
MAPK13 FGF12  
MXD1 SMC3  
SSSCA1OAT  
HDAC1 EFCAB6  
CBL UBE2D2  
TERT MCRS1  
NCOR1 PHB  
CRYAAHSPB1  
MDM4 YWHAE  
MYL6 EWSR1  
VENTX TLE2  
VENTX TLE1  
HTRA1 FAM46A  
PRKCD NFE2L2  
CHRM3 GRK6  
UBE2D3 ARF6  
RLF CBX3  
ROS1 PTPN6  
YWHAZ EPB41L3  
JUP PKP2  
KRT35 DLG3  
SLU7 TNF  
HK1 VDAC1  
MED1 MED13  
MYF6 ID3  
PTPRG TEC  
ROS1 VAV3  
PQBP1 SF3A2  
JAK1 SHB  
CRYGC CRYBB2  
AXIN1 TRIM29  
GC CDC73  
SPRR2A CRK  
SUPT7LMED16  
UBA1 RBCK1  
HDAC1 DHX30  
BCL3 GTF2B

CNTFR KRTAP4-12  
L1CAM RANBP9  
IL2 FO XK2  
PDE6D PTGIR  
MPP3 RAB31  
RUNX1 RUNX1T1  
FXR2 OTUD4  
PTP4A3 CNNM3  
TGM2 COL18A1  
PPP1CCHDAC6  
PCNA KCTD13  
DLG1 TJAP1  
MYOG MDFI  
DYDC1 DPY30  
BMPR2 NBEA  
KLRC4 MICB  
TSPAN6 CHD3  
KLRC4 MICA  
AR HMGB2  
TUBB RIPK1  
APC CTNNA1  
SFN SHROOM1  
APC CTNNB1  
TP53BP2 TP63  
PER2 PGAP3  
UBE2L6 TRIM8  
NR4A3 KDM5B  
TIMP1 MYOC  
SNRPB CTDP1  
REST HDAC2  
TNF LIN54  
PGR FGFR2  
PTPN2 CDK2  
CYP27B1 KDM5A  
SQSTM1 MAP1LC3C  
CRCP POLR3H  
NKX2-5ID3  
RELA HDAC1  
F2RL2 ECT2  
EED HIST1H1A

SQSTM1 MALT1  
ANKRD11 HDAC5  
MAVS TBK1  
TGIF1 INSL6  
STAT1 STAT2  
HCK RPL10  
MED7 MED28  
HSPB1 ACTC1  
MATN4MATN1  
IRS1 JAK3  
CTBP1 HDAC1  
HIP1R CLTB  
HIP1R CLTA  
PML TGIF1  
GTF2E1BRCA1  
GRB2 WIPF2  
PSEN1 GSK3B  
PRPF4BUSP39  
CRP SNRNP70  
AIFM1 MLF2  
RCAN1 UXT  
IKBKB BTRC  
TP53 SMAD2  
FYN GRIN2B  
CD4 SELL  
PKLR PAK1  
NFKBIA POM121  
MGMT PRKCA  
RXRA NFKB1  
XPO1 RANBP1  
GATA5 KLF2  
RHOA RPS27A  
USP10 G3BP2  
TUFM CCNA1  
ZNF259 EEF1A1  
DHX37 DDX56  
MCF2 RHOG  
PTN TOMM20  
GSK3B BICD1  
ANXA2 LGALS13

ENO2 NDUFS7  
FXR2 EWSR1  
DOCK1 MAP1LC3B  
ATG13 MAP1LC3B  
NR3C1 ZNF483  
DES ROCK1  
RAB27A C14ORF1  
CRP CFH  
MAP3K7 FLNA  
SPI1 CREM  
APLP1 ING5  
ADRBK1 CAV1  
PIAS4 BARD1  
GOLGA3 SRR  
ACTN4 MAGI1  
C3ORF10 NCKAP1  
MAPK6 CNOT1  
TSNAX AKAP9  
YWHAB DENND4A  
PSMD7 UBAC1  
PRDX6 PPARD  
TFAM TFB2M  
VIM PKD1  
TRAF6 TARSL2  
FAM58A FEZ1  
PRLHR GRIP2  
AKT1 DLC1  
SERPINB2 IRF3  
GNB2L1 LARP4B  
NEDD9 SMAD2  
TP53 HUWE1  
NEDD9 SMAD1  
RAB1A GOLGA2  
YWHAZ NCKAP1  
FYN NBEA  
PLD2 OPRM1  
CCNA1 ATXN2L  
ADRB1 ARRB2  
RALYL MCRS1  
RAB3B RIMS2

RELA IQGAP2  
HSP90AA1 AHSA2  
ZNF24 CRMP1  
PPEF1 CALM2  
PAX6 PKNOX1  
RNF40 SPRYD5  
TTI1 PIH1D1  
NPDC1 HNRNPK  
TRAF2 SMURF1  
APPL1 RUVBL2  
WWOX CPSF2  
NFYA ATF6B  
HSF1 DAXX  
GMNN MCM6  
PCNT DISC1  
TP53 MAPK11  
FYN KIT  
SRP72 PINX1  
EIF4G2 PAK1  
PSEN1 PSEN2  
SOCS7 IRS4  
HSP90AA1 NDRG1  
MARCH3 UBE2W  
PGR JDP2  
PSMD2 PAAF1  
FURIN ZP1  
FLT4 VEGFC  
DRD2 GNAZ  
PABPC1 NDRG1  
SUMO1 MEF2D  
TNFRSF10B CASP10  
GNB2L1 NSMAF  
MRPS12 C14ORF1  
MCM4 MCM8  
FYB SKAP2  
STK11 STK11IP  
MLNR GHRHR  
ZC3H13 HES4  
NUMA1 SMC3  
PRKAB2 RB1CC1

GRAP2 SHB  
ATP1A1 SMAD2  
KCNB1 KCNG2  
KRT31 PLEKHB2  
KCNB1 KCNG1  
CHEK2 MUS81  
MAP3K7 TNFRSF11A  
SMAD4 PIAS4  
RPS27ADAZAP2  
SMAP1 PHLDA3  
GATA1 HDAC5  
TJP1 SPTAN1  
HLA-B KIR3DL1  
FYB NCK1  
SMAD2 DOCK9  
COPS5 MKNK1  
PRKD1 EPAS1  
FYN NR5A1  
FYN G3BP1  
IRF6 ZBTB3  
TNF CARS  
SUMO3 STAB2  
DISC1 TFIP11  
UBE3A EAPP  
RAMP3 VIPR1  
PRNP C7ORF50  
TNF ADAM9  
PSMD6 CEP250  
PBX2 ZDHHC7  
SNRPB2 IKBKE  
YWHAZ RUVBL1  
RAP2A GPRIN1  
SMAD1 CAMSAP1  
PPP1CCSKP1  
FYN SLAMF1  
USPL1 ANKFY1  
RHOA MPRIP  
SPTBN1 PLEKHA5  
FARS2 G3BP2  
BID RHOA

GNB1 CACNA1C  
RNF144A UBE2K  
TSC22D1 NUP93  
PTPRB CNTN1  
AKT1 MAP3K8  
GABARAP PRKAR1A  
SFN KCNK9  
MAP2 RNASEH2A  
SRC PPARGC1B  
YWHAZ RUVBL2  
PTN UTP3  
PIK3R2 EGFR  
TGOLN2 MMP14  
RPL15 RAPGEF2  
CNOT8 CNOT6  
KLF4 CREBBP  
PSMA3 AURKB  
CCT3 EIF2B2  
CTBP2 HIC1  
F2 SERPINC1  
GZMA SET  
VIM DSPP  
SMAD3 LEF1  
HDAC1 BRMS1L  
ITGB4 PRKCD  
CHD2 PHB  
IKBKB TUBB4  
BMP4 CHRDL2  
UBE2G2 RNF157  
EPX PIK3R1  
PSMD11 PTPRK  
UTRN DISC1  
MCM5 MCM2  
PSMC3 EPAS1  
SMARCA5 SMC3  
UBC PDCD2  
MYL6 USP46  
TNFRSF1B RPL38  
TMEM50A C7ORF43  
PSMC5 SRRM2

SMARCA2 PITX1  
ZNF165 FAM124A  
SPTAN1 DISC1  
LAMA4 ZHX1  
PSMF1 QKI  
UBE2U TRIM15  
CD72 GRB2  
PCNT DISC1  
NCL CYFIP1  
LCK PAK2  
CLDN4 WNK4  
BIRC2 XAF1  
FANCMFANCL  
DIO2 CUL5  
NAE1 TP53BP2  
CASP4 SLC25A1  
TRIM25 PITX2  
PIK3CA GNAQ  
MAP3K7 FLNB  
IL12RB1 IL23A  
ITGA6 COL17A1  
XRCC6 POR  
SMAD1 STARD13  
THRB PRMT2  
LUC7L3 SRPK1  
BACH1 RBCK1  
SOX9 EP300  
CNTN2 TAB2  
ACTB SMAD3  
GRB2 MICAL1  
CCT5 XRN1  
UBE2D2 RMND5B  
GTF2H1 HNRNPU  
DISC1 MYO1A  
KALRN SUMO2  
RELN VLDLR  
ARID2 CHD7  
CHRM3 PPP1R9B  
YWHAZ AANAT  
ATF1 CAMK2G



ATP6V1E1 ATG5  
TP53 COPS2  
RELA PIN1  
PSMD11 PTPRK  
PDGFRB STAT5B  
ATM TERF2  
HNRNPM TNFRSF10D  
ABL1 RAN  
F2 KNG1  
CRMP1 RPA2  
UBE2U TRIM5  
SAP18 POLE2  
ID3 RUNX1T1  
ZBTB17DNMT3A  
FTCD GRB14  
POLR2C TAF15  
GNB4 RIPK3  
B2M HFE  
RAB3A SYTL5  
C7ORF64 WDR33  
GRB2 SHC2  
AP2A2 AMPH  
UBE2U TRIM2  
CREB1 KCNIP3  
PAK1 ZBTB40  
AFF1 MAPK14  
CSNK2A1 MDC1  
HDLBP FAM46A  
TP53 NQO1  
VPS53 VPS52  
SLC9A1TNIK  
DAND5 REL  
MAPK14 POM121  
PRKD2 LGALS12  
RELA CARM1  
SS18L1 GATAD1  
GRB2 DAB2  
WEE1 CASP3  
NCOR1 KIF11  
PSMC4 IKBKE

HERPUD1 SYVN1  
UBE2D1 TRIM39  
GFAP DAXX  
EPB41 YWHAB  
PDIA3 SUMO4  
EPB41 STIP1  
CAV1 TRAF2  
EPB41 S100A11  
UBE2D3 RNF130  
HNF4G RANBP9  
MED7 PML  
EEF1A1MRPL42  
CTNNB1 TCF7L2  
FOSL2 RNASEH2A  
PLA2G1B CSF3R  
ANXA7 ALG2  
CDK4 CDKN1C  
TBC1D4 NFAT5  
HLA-A PDIA3  
MAGEA11 ZSWIM2  
PSMC2 PSMD5  
SRI CACNA1C  
GTF2A2 HSF1  
IGF1R CBL  
ACTA1 MIB2  
PARP1 HIST1H1A  
WASL PACSIN3  
CSDE1 TNFRSF10D  
NF2 SOS1  
C1R C1S  
CDC7 CLSPN  
SDC3 EPHB4  
BBS7 BBS2  
HIVEP2 WNK1  
YWHAZ MAPK6  
YWHAZ FSCN1  
EIF2AK2 STAT3  
GSDMD MAPK6  
EZR CASP8  
TRIM23 TROAP

MME CSNK2A1  
MYH10 RELA  
RORA RUVBL1  
CDKN2A TPI1  
PRNP WIBG  
EP300 RUNX3  
NCK1 FLT1  
TRPC1 HOMER1  
PRKD2 MTF2  
PCBP4 LYST  
GRB2 HIST1H3J  
SRC HCN2  
KLF4 HDAC2  
BCR GRB2  
TXN NFKB1  
EEF1A1 BRMS1  
SMAD1 VPS24  
IDUA MPP3  
YWHAZ C14ORF166  
ZRANB2 YY1  
MAP3K7 IKBKG  
KAT2A MED16  
ADRB2 CNBP  
NRP2 FLT1  
MUM1 HOXB13  
PCP2 ADRA1A  
ATP5J2 ARL8B  
DDX3X ELF3  
POLR2G MED29  
TOR1A DYNC1H1  
GPS1 COPS8  
HNRNPA1 XRN1  
RAB5C RIN3  
KRT18 TRADD  
KISS1 MMP24  
ELP2 ELP4  
MLL CDC73  
CCDC90B TAC3  
HCK PLAUR  
GABRG2 DRD5

SPP1 CSNK2A2  
UBE2E1 UBE3A  
NR1H3 NCOA1  
KIF5B MEPCE  
PRPF40A MECP2  
RPF1 RPS27A  
PRKRA RB1  
STK16 KCNH4  
HOXC8 GRB2  
KCNAB2 SQSTM1  
PSG3 FAM46A  
FANCA PCNA  
TLR5 RNF216  
TP53 PSME3  
CACHD1 XAB2  
KHK RANBP3  
HBP1 ANKRD2  
HNF4A NRBF2  
LBR FNBP4  
PAK4 LIMK1  
PDGFRA PLCG1  
UBE3A UBQLN1  
ILK DHX36  
TFAP2A EP300  
F13A1 FN1  
PSMD11 PSMD10  
HSP90AA1 MAPK1  
EGFR KRT7  
LDB2 CTBP1  
XIAP UBE2E2  
RUNX2 SMAD5  
PDGFA FURIN  
ERH SH3GL2  
MAPK1 ID2  
FHL3 PAK7  
SMAD9 VPS8  
TUBG1 IKBKG  
UBE2D1 RNF11  
NANOS3 HTRA1  
NPBWR1 NPW

CDK1 CCNE1  
KIAA1267 NINL  
HTR2B GNAQ  
UCHL1 RANBP9  
NUP98 HNRNPUL1  
CST6 PINX1  
ANXA1 NFKBIA  
TMED10 GORASP2  
KIAA0776 UBE2D2  
TP53BP2 EEF1A1  
TKT YWHAZ  
HCK MAP4K5  
SMAD1 LEMD3  
CASP1 NOD1  
ABHD16A GPRC5C  
DLG1 KIF13B  
INHBB ACVR1  
GEMIN5 DDX20  
LDB1 CTDSP1  
EGFR SHC3  
YWHAZ FKBP4  
KLHL12 DVL3  
NR4A1 EEF1A1  
BIRC5 CDK4  
KPNA3 KPNB1  
ZNF434 ZNF167  
YWHAZ WWC1  
SMARCB1 BCL7C  
HDAC2 REPIN1  
CHMP1A VPS4A  
HLA-B UBE2K  
ITGB1 LAMA1  
MAPK9 SF3B4  
ARID2 BCL7C  
SKP2 COPS5  
ADCY5 PRKACA  
MAGEA11 NIF3L1  
PBX2 SMYD3  
ENAH ABI2  
HLA-B UBE2D3

NEFM SQSTM1  
TNFRSF10D HYOU1  
ZBTB25TRAF2  
HSP90B1 HSPA9  
CHGB ACACA  
ZNF638 KIAA1279  
SMAD7 MAPK14  
ECHS1 IKBKE  
UBE2W RMND5B  
FHL2 SAP30BP  
SIP1 CTBP1  
NUCB2 CASP8  
DDB1 DCAF13  
LY6H DVL3  
SLC16A3 BSG  
YWHAG WNK1  
ZWINT MAD2L1  
PTN GTF2F1  
TRAF5 TNFRSF12A  
NXF1 NXT1  
INS HLA-DQB2  
ZYG1 BSPLY  
NUDT1 RNMTL1  
SRC SH2D3C  
RRP1 THOC4  
PTS PBRM1  
PSMC2 GTF2B  
PLCG1 PLD1  
CD3D AMFR  
SDSL TUBGCP4  
PTPN18 PSTPIP2  
ERH TLE1  
HSP90B1 BIRC2  
KRT14 PKP1  
FURIN BACE1  
PPP1CCMAP3K3  
SHC1 MAPK8  
ZW10 DCTN2  
ASPM TP63  
APLP1 KIAA1377

CBL SCN5A  
PRKCA PLD2  
SMAD9 CPXM2  
LMO4 RBBP8  
CAV1 EEF1A2  
PTP4A3 DNAJB11  
RALB BECN1  
VPS28 ASF1A  
CD2 MXD1  
GATAD2B FOXP2  
RSF1 WNK1  
FLT3 RPS27A  
EDNRB CAV1  
SMNDC1 DDX21  
EXOSC6 NDUFA13  
MAPK6 CYP20A1  
CDK1 DLGAP5  
REN KCTD15  
RUNX2 HDAC7  
KLHL12 RIT1  
INSM1 HDAC1  
RPF1 AMOTL1  
DRAP1 POLE3  
FYN BRCA2  
GH1 PPP2CB  
HAND1 HEYL  
FLT3 GRB2  
APC MYH10  
UBE2D3 DTX1  
IGFBP4 HK3  
CACNA1G UBQLN4  
DMRTB1 EWSR1  
MEF2A ZFR  
MUC1 ZAP70  
HIST1H4I FKBP14  
YY1 HSPA4  
CSNK1A1 SYT12  
FHL3 LNX1  
NCOR1 NR1H3  
RUVBL2 TELO2

HCK CCR3  
CD44 HBEGF  
RAMP1 IAPP  
TCERG1 TPM4  
TBPL1 PMVK  
HLA-B RAB2A  
CSNK2A2 CREM  
RUNX2 CBFβ  
PEPD ATXN1  
GFAP MAPK14  
DNM2 SH3GL2  
NR1H3 LZTR1  
BCCIP PRKAB1  
RPA1 AKTIP  
CTSD PSAP  
MATN2 COL4A4  
NR3C1 NCOA4  
XRCC6 CREBBP  
TLR4 SIGIRR  
CDK9 HSPA2  
XPO1 RCC1  
ABHD16A UPF1  
STAM2 XRN1  
COPS5 KLHL15  
CTBP1 BMPR2  
PRKACA ACCN2  
SSBP2 EWSR1  
VCP UBE4B  
DCXR TRAF6  
IFNGR1 NFKB1  
UBE2D3 DZIP3  
XPO5 IKBKG  
INSR DOK4  
GP1BA SELP  
CTCF SMAD3  
MSH6 RPS27A  
MAPK1 KHDRBS1  
GRB2 SMU1  
UBL4A HUWE1  
GADD45G CCNB1



GDI1 RHOH  
HOMER1 TANC1  
PIK3CGPIK3R5  
DDB2 USP40  
BUB1B AP2B1  
OS9 SMAD2  
MED26 RBP1  
RAB8A OPTN  
TLR2 HRAS  
LYPLA2 MED31  
LCK CCR5  
DLST USP13  
DAND5 PRKDC  
POU2F1HCFC1  
XRCC6 NHP2L1  
APTX ZNF639  
FNTA VAV2  
KRT85 ATG3  
VIM GOPC  
PSMA7 MCC  
RGS12 GNAI2  
SH3KBP1 ASAP1  
SGK1 CAMKK1  
DTNBP1 ZNF490  
CDK9 RUVBL1  
BCL2 BBC3  
AKAP5 GABRB3  
PSMD4 RPS27A  
HPRT1 IKBKE  
SMARCA1 RBBP7  
RABIF RAB1A  
ZNF638 HOOK2  
IKBKAP PLP2  
MGEA5 HAP1  
USHBP1 FATE1  
SOD2 IKBKE  
MAPK1 CASP8  
SKIL RNF111  
EIF1B ETFA  
CHMP1B CHMP5

EPB41 VAMP3  
ZNF350 RNF11  
S100B GUCY2D  
SEC24BPLCG1  
USP28 USP25  
TP53 MAPK3  
PCNT TUBGCP3  
SRRM1 OGFR  
RPS27ATRVP4  
BAZ1A BAZ1B  
FAM13A MEF2C  
WDR62 TBP  
VPS37BVPS28  
ETS1 MAPK1  
PRKAR2A PPP1CB  
ATXN1 PRRC2B  
RXRB PPP3CA  
CREB3 BNIP2  
EPB41 RPS21  
SMARCA2 CDX2  
GUCY1A2 DLG4  
GTF2E2MNAT1  
RUVBL2 RIPK3  
ATP4B STX1A  
GTF2E2CCNH  
SNRNP70 RNPS1  
DFFA CYP4B1  
EMD MED4  
RAF1 RB1  
SKA3 SKA1  
PPFIA1 NCOA2  
COL8A1 EFEMP2  
ETHE1 ATP6V1H  
NCOR1 REST  
VTA1 TRAF6  
BCL2L1BLID  
EXTL3 PLCG1  
MYH1 ACTR3B  
DIAPH1RAC1  
RUVBL2 TRAF6

YWHAG ARHGEF6  
PGR SMARCD1  
ACTN1 PTPN6  
ACTN1 SHC1  
RDX SLC9A3R2  
LIMK1 PAK2  
SMARCD1 ING1  
SRC EVL  
H3F3B ASF1A  
SSSCA1VTA1  
ERI3 PRNP  
CDK9 RUVBL2  
KRT18 BBS2  
NBR1 MAP1LC3B  
TP53 PPA1  
RELB SMARCB1  
EEF1A1TAF9  
UBE2D1 HDAC6  
CD72 BLNK  
HTT MAP3K10  
UBE2D3 RNF2  
MTNR1A RAB10  
YWHAB KLC4  
CALM2 PIK3C3  
TOR1A TOR1AIP2  
HGF SDC2  
FN1 MAG  
ETS1 ZNHIT6  
PDIA3 BACE1  
MLF2 FAM96B  
CAPZB TRAF6  
RARA HDAC4  
FOXO1 SKP2  
PTN FAM176A  
NRP2 SEMA3B  
YWHAG OSBPL3  
PRKAR1A C2ORF88  
EGFR ATP5C1  
EP300 CKLF  
ABCA1 APOA1

TXNDC9 IMMT  
PQBP1 RAB8A  
WAS DLG1  
GDF5 ACVR2B  
GRN GFI1B  
GRIN2B AP2M1  
MEN1 EBF3  
GATA3 ZFPM2  
AGT ACE2  
MED7 RELA  
DTX1 UBE2D4  
SPRY2 SPRYD5  
BUB1B BRCA2  
HSPA1B PRKCZ  
LYN MAP3K3  
CBX7 BMI1  
CBX7 PCGF2  
NMT2 CASP3  
NKX3-1 HIPK2  
DUSP1 MAPK8  
DUSP1 MAPK9  
SMAD7 MAP3K7  
KCNA1 RTN4  
CDKN1B GRB2  
ASCL3 GTF2A1L  
DAPK1 RIPK3  
PRKCG PPP1R14A  
ZMYND8 FHOD1  
CSTA PTN  
HSP90AB1 MAP3K8  
DTNBP1 PLDN  
RIPK2 NOD1  
EHBP1 EHD1  
UBTF TBP  
CYP27B1 SMAD3  
THRB PPARGC1B  
POU2F1 STAT5B  
SYP VAMP2  
CD36 CD9  
PSEN1 DOCK3

USH2A COL4A3  
SMAD9 DIAPH3  
PDCD6IP SH3GL2  
PDCD6IP SH3GL3  
PDCD6IP SH3GL1  
MAPK1 LIFR  
JAK1 IL21R  
SCNN1A USP10  
KIF3B MAP3K11  
CREB1 CHD8  
MAF AHR  
LIMK1 PAK1  
NFKBIB FBXW11  
KRT20 FXR2  
UBE2D1 RNF14  
ALPP PIGK  
IKBKE NAA15  
MAST2 GCN1L1  
KIF3A USP7  
RPS27A SMAD1  
ELK4 ID2  
RPS27A SMAD2  
KCNH4 SUMO1  
UBTF CCNA2  
WAS PTPRJ  
JUND RFWD2  
ABL1 MKI67  
MARK3 PNPLA2  
RNASEH1 TNFAIP3  
CCT8 MAP3K1  
DDX58 UBE2D1  
GFI1B DNAJA3  
MGST2 HDHD2  
QARS RNF11  
MYO15B RAD54B  
GSK3B FIP1L1  
HAP1 TIMM17A  
MYC RAGE  
SMARCA5 CHD3  
TAL1 LDB1

GUCY2F      GUCA1B  
RPS27A PELI2  
PRRC2A      PRMT2  
GORASP2     TRAF2  
REM1   YWHAE  
RPF1   RPAP2  
ZNF225 CDKN2A  
EFEMP2      GF11B  
PTN    CTNNB1  
KLHL26      UBQLN4  
USP46   SET  
HAP1   NDUFB9  
TRIM37 PNKP  
CASP9   PRKCZ  
PRMT5   SMARCB1  
PTN    BMI1  
CUL4A   GRWD1  
MAP2K7      SMARCA2  
GTF2F2 MEF2C  
PRKRA   DICER1  
RPA1   ORC2  
NCL    ARFGEF1  
TP73   RNF38  
CMBL   SMYD2  
CREB1   BRCA1  
FH    GRB2  
DYNLRB1     MPP6  
NONO   PSPC1  
ECM1   RERE  
CSN2   PACSIN1  
CTNNB1      FHL2  
UBE2D1      RNF7  
SF3B1   RBM17  
TP73   SMAP2  
RPS27A SMURF2  
CDH23   USH1C  
MDM2   NUCKS1  
TFE3   CUL2  
INO80E UCHL5  
SQSTM1      OSBPL8

OTOF STK39  
NR0B1 COPS2  
COIL KLHL8  
DLGAP1 MYO5A  
UBE2D2 TRIM5  
CDH1 MDM2  
EPB41 MTPN  
EPB41 DRD2  
GAPDH PDIA2  
HOXB2 EP300  
RBFOX2 ESR2  
MED12 MED8  
MYC TAF1B  
PDHX EP300  
UBE2E1 DTX3L  
SART1 RNPS1  
CDKN1B RPS27A  
AGTRAP PITPNC1  
TP53 TAF1B  
MAGEA11 NDEL1  
NR1I2 POU1F1  
GAPDH TRAF1  
E2F1 PA2G4  
ITGA6 ITGB7  
MYBL2 TRIM15  
HEATR2 FEZ1  
NUP62 GORASP2  
FAS FADD  
PIH1D1 TSC22D4  
NAA15 UBA5  
EGFR LRIG1  
AKAP5 KCNJ2  
SMARCB1 SMARCC2  
PGK1 PCNA  
SGSM2 FNBP1L  
CLK3 C1ORF63  
HARS RPL5  
AIRE PIK3R1  
KDR SHB  
SGK1 IKBKG

SNCA SPTBN1  
XRCC5 BARD1  
TPM3 SMAD3  
HDAC1 TXNIP  
YWHAG EFTUD2  
F13A1 FGG  
POMC MC3R  
PSMB5 PINX1  
PGRMC1 MCC  
TERT PINX1  
CCNE1 SKP2  
IKBKE PRPF19  
F13A1 FGA  
VIM NFKB1  
GFI1B RNF31  
LYN DOK1  
ARRB2 HIPK3  
COIL KLHDC5  
LAPTM5 TOM1L2  
CLU MDM2  
PDLIM5 TRIM39  
ELN FKBP10  
GRM3 LGALS12  
DAND5 PML  
ARGLU1 IKBKG  
USP30 MPND  
KIAA1967 TAB2  
A2M TGFBI  
RAD18 SRRM2  
SMAD1 ZNF510  
ITGB2 PRTN3  
FANCA DUS4L  
BAG6 TSC22D1  
POLN FANCD2  
THBS1 IGFBP5  
C5AR1 WAS  
IKBKB NR2C2  
RPS6KA5 STAT1  
RELA USP31  
PIM1 BMX



STAM2 UBE2D3  
EGFR PIK3R3  
NFKB1 HNRNPF  
SUPT7LTAF8  
GNAI1 RASD1  
RANGAP1 PMS1  
BCR HNF1A  
PPFIA3 CAST  
MAP3K12 SH3RF1  
FAS ARHGDIA  
ACTR1A DCTN4  
SOX6 CTBP2  
CALM2 TRPV1  
ILK UNC45A  
SPINK1 TMPRSS15  
ADRB1 GRB2  
RBM15B KDM5B  
TGFB1 TTN  
GABARAPL2 PTPLAD1  
TFE3 SMAD4  
MMP2 CXCL12  
HSPA1B RIPK3  
PEX14 SMARCC2  
MTSS1 RECQL5  
FOXO3 RAD17  
RFC5 RPAP3  
HNRNPC CCDC85B  
HIST1H3J CBX2  
ATG13 RB1CC1  
HLA-B HADHA  
PFN1 C14ORF1  
SGTA UBL4A  
ACVR1 FGD6  
DNM1L RRM2  
PTGIR GNAS  
DDX3X NUP62  
ANKRA2 HDAC5  
MYB CEBPB  
DVL3 BAHD1  
RPH3AL RIMS2

DVL3 LNX1  
F12 KLKB1  
RELA ITGB3BP  
UBE2I MAL  
UBE2I MUL1  
CDK1 GFAP  
ACTC1 PLEC  
FOXO3 FOXM1  
HUNK RABEP1  
IL16 EFEMP2  
CD44 MSN  
EGFR ANKS1A  
GAS7 CYFIP2  
IMMT ARMCX3  
TFCP2 UBP1  
EIF4A3 YWHAG  
UBE2C POLM  
VAV1 MERTK  
SOCS1 TEK  
HIST1H2BK HIRA  
ERBB2 FGR  
SRF NKX3-1  
PML SMAD2  
STAT1 SPTBN1  
SOS1 SH3KBP1  
DHX9 TNFRSF10D  
CBFA2T3 RUNX1  
BCAR3 RCC1  
SUMO2 FAM176A  
ZDHHC17 WNK1  
EEF1D ARHGAP21  
IFNAR2STAT2  
ANK3 TIAM1  
EPB41L3 MBIP  
REL TUBA3C  
PDIA6 PRKAB1  
CDC20 ANAPC11  
MYH9 EMD  
DMD SNTB1  
CEP290 MEF2A

WDR48 RAD51AP1  
EIF1B SRP14  
ARHGEF6 SMAD2  
ARHGEF6 SMAD1  
STAT1 E2F1  
CRYBB1 ABCC8  
NCK2 PKN2  
TPM3 FTSJ1  
HNRNPU PIN1  
UBE2U MID2  
MAPK9 XPNPEP1  
TOR1A LRRC7  
RHOA DAAM1  
JAK2 FYN  
SRRM1 PNN  
EIF1B AK2  
MED30 MED23  
UBE2D1 RNF115  
TNFRSF10B RIPK1  
EGFR ITGA5  
HLA-B LILRB2  
FYN CTNND2  
XPA GTF2E2  
RAB2A FAM71C  
FLNB PLCG1  
NPPA ESR1  
JAK2 INSR  
CHRAC1 BAZ1A  
UBE2D1 TRAF6  
RAB5A VPS45  
ATP6V1G1 ATP6V1E1  
CDK4 IFI27  
BMP4 SOSTDC1  
HCLS1 WAS  
BCL2L1 DYNLRB1  
RPAP2 GPN3  
NFE2 KAT2B  
OSBPL9 VAPA  
KPNB1 AHCTF1  
FSCN1 DNAJB9

PLCG1 TRPM7  
NPHP4 RGRIP1  
TNFRSF1B TRAIIP  
RANBP2 SUMO3  
AIP TOMM20  
MED14 ACTN2  
CTNNB1 AHCTF1  
SFN RASSF1  
ENO2 SIGIRR  
RPS6KA2 SHANK1  
PARD3 F11R  
TAP1 SEC14L3  
CUL4A DCAF15  
CCT3 MOBKL3  
HIST1H4I PRMT7  
CEACAM1 PTPN6  
HNF1A HNF1B  
SP100 UBE2I  
POLB TAF1D  
BAK1 BCL2L10  
DENR MCTS1  
CEACAM1 SHC1  
ARRB2 SMARCC2  
YWHAG RAB11FIP2  
MCM2 MCM10  
MCM3 MCM10  
ATXN1 TTC19  
TP73 PML  
SGTA HSPA4  
TCEA1 GTF2E1  
POU3F3CAV1  
SCAF1 UBQLN4  
SGK1 FANCA  
RFX2 RFX6  
TPT1 IKBKG  
RPS27A SMURF1  
UBE2I TRIM63  
CLN3 SFXN4  
GRM7 TUBA1A  
SATB1 HDAC2

RIBC2 RAD54B  
DHX9 NXF1  
KRAS RAF1  
RASA1 PIK3R1  
SMAD2 CISH  
ABL1 YWHAE  
ITGB6 FLNA  
GPN1 POLR3E  
APPBP2SYT12  
NPEPPSCLN3  
EIF4G3 EIF4A2  
LRP8 SCN3A  
BCL3 NFKB2  
TSC22D1 UCK2  
POLD3 PCNA  
RAF1 YWHAG  
CHD3 MBD3L1  
HNRNPA3 SREK1  
OSBPL10 SRRM2  
SLPI GRN  
RANBP2 SUMO1  
BCR CLTC  
HNRNPR CRK  
HSPA1B GPRIN1  
KDM4BMED10  
DNMT1 CBX5  
GDF9 TK2  
PRPF3 USP4  
PIAS1 SP3  
NCOR1 TRIM28  
AMPH DNM2  
COL6A1 LGALS3BP  
CNOT10 USP22  
GFAP MAPK6  
HSPA1B TRAF6  
NANOS3 ELAVL3  
CHGB MGLL  
SH2D3C SNCAIP  
CCNC ESR2  
PRRC2A MAD2L2

MAP7D1 VOPP1  
BRF2 SSR3  
PRSS23 PDDC1  
PLD2 ALDOC  
MLH1 MAP2K6  
CD81 MYOC  
KPNA6 BRCA1  
SAP30 HDAC1  
HADHA GABARAPL2  
EXTL3 FYN  
SRI RYR2  
RXRA KIF1A  
UBE2D3 ZNRF1  
ZNF44 CSNK2B  
HLA-C TRIM28  
FAM40A TRAF3IP3  
CDK5 RNF32  
FDFT1 ARL6IP1  
APP MAPK8IP2  
ZFAND5 UBC  
CYB5A POR  
DDX5 SMAD3  
SMAD4 STK11IP  
CSNK2A1 RELA  
MAPK1 CENPE  
DEDD CASP8  
IRS1 YWHAH  
PSMB1 IKBKE  
FBL PASK  
CCR1 CCL26  
SPTAN1 TAB2  
BRCA1 CLSPN  
CSNK2A2 CAV1  
BCL7B RUVBL2  
CASK TBR1  
CFTR PRKACA  
FANCMDEC1  
ATP5L PHLDA3  
SSR4 MAP3K1  
SRSF5 MAPK14

NEK1 EXOSC4  
NCBP1 SF3A2  
HIST1H4I ASF1B  
ARRB1 RPL7L1  
CCND2 CDKN1A  
HCK CD2AP  
LZTR1 FANK1  
ETFPA PRKAB1  
GAP43 TSC2  
USP32 FARSA  
NGFR TCF19  
MEAF6 ING3  
CAPZB RIPK3  
NCOR1 GPS2  
COMMD2 COMMD1  
NUPR1 MYOD1  
FFAR2 GNAO1  
CS RAE1  
GPN1 POLR3B  
PSMA7 EPB41  
ARHGAP1 ITPR1  
BAG6 RAB8A  
IRAK1 PELI2  
ACTN1 PDLIM5  
PLAUR SURF2  
AP2B1 THAP1  
RPL31 EWSR1  
PDIA6 TRAF6  
GIPC1 ZFPM1  
BUB1 RAE1  
ABL1 CRK  
SKI EYA3  
ABL1 CRKL  
IL6R STAT3  
RUVBL2 UCHL5  
SMAD2 BAZ1A  
CUL4A DTL  
UBE2WRNF185  
LPL LRP1  
PHYH FKBP4

APP CALR  
PRPS1L1 SPG21  
KEAP1 OSBPL10  
ZFYVE9 ETS2  
ORC1 TSG101  
CAPN2 PTPRN  
ELANE SERPINB1  
IKBKG ODAM  
TP53 IGF2BP1  
GABRA1 DRD4  
KLF4 KAT5  
KRT15 CCDC120  
YWHAG SH3BP5L  
DAND5 CCNA1  
RFC4 USP20  
TBX3 HDAC2  
NR3C1 POU2F2  
MTA2 CHD4  
TNFRSF1B HSPA1B  
GFI1B ANKS3  
ETS1 ZFR  
ADCY8 CALM2  
CUL1 DCUN1D1  
CD55 CR1  
GYG1 GYS1  
EGFR UROD  
EWSR1 PHB2  
HTT FICD  
DLGAP3 SHANK2  
RASA1 DOK1  
AKT1 TSC1  
DVL2 TRAF2  
OSM IL6ST  
PFN2 CCDC113  
FDX1 NR4A2  
P4HB COL10A1  
KRT15 NOC4L  
JAG1 NOTCH3  
CTNNB1 PLK1  
RPS19 RPS19BP1



YWHAE USP43  
OGT CDK2  
CLTC RELB  
KCTD12 RASSF5  
KIF5C KIF5A  
TRA2B YWHAZ  
RNPS1 PGAM5  
FOXC1 PITX2  
HLA-B IGF2BP1  
PFDN1 HAP1  
DHX9 PRPF8  
UBE2W TOPORS  
BUB1B MAD2L1  
DDIT3 TRIB3  
PRPF31 USP15  
CDC73 CPSF2  
SPAG9 PLK1  
GTF2A2 GTF2A1L  
CLOCK RARA  
RAP1A RGL4  
DDX3X SRRM2  
HBXIP GAPDH  
MAP4K1 DBNL  
HNRNPM GSTK1  
PLSCR1 CDC42EP1  
GRB2 LAT2  
CBR3 RAB35  
HIST3H3 ASH2L  
TNIP1 MAGEB18  
TP53 UBE2N  
HUS1 RAD9B  
H3F3B THRAP3  
BIRC5 HSP90AA1  
GDF5 BMPR2  
TP53 UBE2K  
FYN RAPGEF1  
SRC DLGAP2  
UBE2E1 UBASH3B  
YWHAZ TPD52L1  
ULK2 LUC7L2

MYC SMC3  
CCDC85B C10ORF18  
SNRPE GEMIN7  
ITGA5 L1CAM  
SRC AFAP1L2  
DNAJA1 MAP3K14  
PGR POU2F1  
EED SETD8  
AKT1 TOPBP1  
PRRC2B RERE  
CENPB CENPA  
ABL1 TOP1  
CXCL10 DPP4  
DNAJA1 RELA  
EPHB6 GRB2  
NPM1 BRCA1  
APLP1 CNTN3  
FGF7 HSPG2  
MAP3K8 MAP3K14  
SRC AFAP1  
FLNA SMAD3  
NEDD9 ZYX  
KRT15 TUBGCP4  
ARMC6 PHLDA3  
USP2 CCDC85B  
MRPL13 TRAF6  
PLCG1 EPHB2  
IKBKE MYO6  
CSK PTK2  
HBXIP EEF1A1  
NCK1 EPHB2  
VASN NCSTN  
HTT UTP14A  
FANCA SMARCA4  
PPP5C USP49  
YWHAZ KSR1  
DRD4 KCNJ9  
NOTCH3 JAG2  
KPNB1 CDT1  
TRIB3 RBM4

GTF2F2 POLR2H  
PLCG1 GRIN2B  
CDH24 PPP1R16A  
HSPA4 HDAC1  
EZR SCYL3  
GPN1 MED17  
ARF1P1 CYTH2  
COPZ1 COPG2  
PTEN UBE2I  
FOXO1 SMAD4  
AR AES  
SMARCA4 BCL7C  
PPP1R15A BCAR1  
KLRC4 TYROBP  
EP300 RUNX2  
MCM3 MCM2  
POLR1C POLR1A  
LDB2 SSBP2  
CASP14CASP8  
EIF1B PLS3  
ARHGEF7 SHANK1  
NECAP2 TRAF2  
NRIP1 NR1H3  
MAGED1 COPG  
ACTC1 TRIM63  
KCNN4 CALM2  
SGCG SGCB  
IL1B CASP1  
RNF40 CENPO  
SMARCC1 ITCH  
GRID2 GOPC  
ESR1 TCF20  
SSX3 PCBD2  
RHOA SH3BP1  
DDB1 USP40  
POLR2C CTDP1  
MAP3K7 MAPK8  
DERL1 DERL2  
MAP3K7 MAP2K4  
ATP5J NFKB1

TP53 WWOX  
CDKN1B UBE2D2  
EPS8 MRPL20  
MYO7A MYRIP  
SOX6 CENPK  
SMAD9 HUWE1  
RGS14 GNAI3  
RIT1 RGL1  
YWHAG TBC1D1  
DAND5 NANOS3  
UBTF RBL2  
HADHBNFKB2  
EGFR PTPRC  
PLXNB2 RND1  
AP2B1 NECAP2  
NFKB1 RSF1  
RPL31 EWSR1  
PTPRC MAPK3  
RAD23A IFIT5  
STXBP3 SNRPB  
TP53 CARM1  
VAV1 RACGAP1  
DDX3Y SHBG  
NAA38 THUMPD3  
EWSR1 ZNF184  
RIPK2 HSPA2  
HLA-B TTLL12  
EGFR MET  
PLCG1 LTK  
NFKB2 TUBA3C  
SLC9A3R2 SGK3  
XPO1 AGFG1  
CHGB TWF2  
SPI1 NONO  
B4GALT1 TUBA4A  
SRGAP2 FASLG  
RFC4 FAN1  
PTPRG CTNNB1  
PML MAPK11  
PFDN1 SKP2

PPP4C DHX38  
MYBL2 NLK  
CUL1 GCM1  
BMPR1B VEPH1  
FES JAK3  
CDKN1A ITGB1BP3  
TUBB NCALD  
MYB EP300  
PLCG1 AEBP1  
PLCG1 SHC1  
PRPF6 RAF1  
NFKB1 SIN3A  
GAPDH PAK2  
CDK14 SMURF1  
MLX SAP30BP  
RELA MTDH  
PLIN3 TBPL1  
RGS20 SET  
TIPRL PPP2CB  
RMND5B UBE2D4  
ACTN4 LRRC7  
PCNA RAD9A  
ERBB3 GRB7  
SUMO3 RCOR1  
CTBP1 HDAC9  
LIMS1 RBBP8  
IL7R JAK1  
XRCC1 PARP2  
NANOS3 GCDH  
RAD23A OTUD1  
EIF2B5 EIF2B4  
TCF4 DAXX  
HIST1H4I SET  
PDE9A TRIM32  
PTPRD PPFIA1  
CRK TRIM39  
HDAC2 INGX  
MBP DYRK1B  
RPA2 HERPUD1  
TAF1 HSF1

RPAP2 ARMCX3  
RNASEH2A MAPK9  
RNASEH2A MAPK8  
PTN MAD2L1BP  
FYN SKAP1  
KRT18 TUBGCP4  
SHPRH USP49  
TRAF3IP2 TRAF2  
CUTC SPG21  
SOD2 P4HB  
MYL2 MYOC  
SMARCD1 BAZ1B  
CRK EPHB3  
SRF CSNK2A1  
STX3 VAMP3  
SRC RXRA  
FYN SHROOM2  
SGK1 HYOU1  
IRS4 MTNR1A  
EIF2S1 CASP6  
SMAD4 EIF2AK4  
SNX2 LEPR  
XRCC1 POLL  
SGK1 GDI2  
HDAC3 NR2E3  
ATXN1 PIM2  
RAG2 SKP2  
APBB1 VASP  
STX3 STXBP2  
TOMM22 PHLDA3  
IL7R IL2RG  
NR3C1 HMGB1  
GRAP2 RBPMS  
NOTCH2 DTX1  
TP73 CDT1  
RIPK2 TRAF6  
RPL15 COPS6  
RB1 CUX1  
PRNP SCNM1  
CS TAB2

SHC1 RAPGEF1  
SPTAN1 EXOC1  
RB1 RUNX2  
DCXR GSTK1  
TRIM37MAP2K5  
SLC6A2STX1A  
UNC119 ARL15  
MED28 SNX9  
S100B TNIP1  
NFKB2 TUBA1A  
HNRNPF YWHAZ  
MED18 MED28  
LYN RPS27A  
SFRS18 PNN  
SKP1 FBXW8  
GNAI1 GPSM3  
RUVBL2 NOP58  
EGFR PRCC  
PPP1CBRYR2  
GEMIN4 NFKBIL1  
PITX1 SMAD3  
FBN2 MFAP5  
TIMM23 TIMM17A  
TADA3 MAGEH1  
TCERG1 SF3B2  
APC MYH11  
IKBKE METTL11A  
CSTA USP53  
ADIPOR1 APPL1  
JAK2 STAT2  
CSNK1G2 PPP1R14A  
HPRT1 WDYHV1  
FTH1 CD99  
DDB1 BRWD1  
PLCG1 ID4  
ILK HEATR1  
PTPRS EIF4A2  
SATB1 HDAC1  
NFKBIE C1QBP  
FOS RBM6

ATN1 TLE1  
MPG RPS29  
CTR9 CNTNAP2  
DSG1 USP53  
EPRS TFE3  
NF1 SUMO1  
BCR RASA1  
SERPINB9 MED31  
MDM2 ZBTB1  
ANXA6 MLH1  
TFE3 EIF3I  
LILRA3 EWSR1  
AR IL6ST  
CRK DNM2  
CLPX CIAO1  
MAGI3 USP43  
EGFR ROS1  
RAD51C CACNA2D3  
FASLG MPP4  
ADAM15 SH3RF1  
BCAR1 RAPGEF1  
GPN1 PIH1D1  
GNB1 PDCL  
POLB PRKCA  
CTCF HSPB9  
ZHX1 ZHX2  
FYN TUBA3C  
KDM1AHMG20B  
CLINT1 GABARAPL1  
IER3 TNFSF10  
MAML2 CREBBP  
NCAM2PRNP  
RNF38 UBE2D4  
TP53 AGBL2  
INSM1 MPP3  
LEF1 RUVBL1  
WDR91 STX8  
TIMM44 ARAF  
PLK1 MLF1IP  
CKS2 UNC119



HLA-C TBCA  
EXOC5 EXOC3  
EEF1D CSNK2A1  
FCER2 CR2  
CCT8 PPP2CA  
CCT4 GPN1  
CRK CELSR2  
CUBN RRP1  
NUTF2 KPNB1  
SOCS1 ERBB2  
DYNLL1 GPHN  
BCL10 UBE2V2  
XRCC6 NDRG1  
DPEP3 MECOM  
TNFRSF14 CNIH4  
GATA1 TAL1  
CLNS1A EPB41L3  
DPPA4 CRK  
AGR2 CCDC90B  
KHDRBS1 SMAD2  
HLA-B RDX  
HUS1 HUS1B  
CCL8 DARC  
PCP2 HSPG2  
RET PTK2  
HTR1E PSMC4  
NUAK1 USP9X  
CCND3 RBL2  
COPS5 BTBD2  
SNRPD3 SRRM2  
RORC NCOA6  
DDX5 CREBBP  
LIMK1 ROCK1  
MAPK3 ARRB1  
CCDC85B GF11B  
LBR PHLDA3  
FFAR1 GNAI1  
STAT1 PTK2  
TOP2A CDT1  
CREB1 CEBPB

RALA CSDA  
RELA BRMS1  
ABL1 MUC1  
EWSR1 WWP1  
DYNLL1 PFKP  
PPIE XAB2  
APP FBLN1  
MAPK1 SOS1  
HIST1H1B CDK2  
VHL CCNA1  
NPM1 GADD45A  
ITGB2 MAPK8IP1  
ANK3 FADD  
ENO2 ANXA11  
SHC3 ARHGAP32  
KLHDC5 SERTAD1  
UCHL1 CCDC14  
CANX NAF1  
CDC42 ARHGEF25  
LCK HSP90AA1  
DEDD ABCA9  
RECQL5 ALDH7A1  
CDC42 ARHGAP32  
PRPF40A CCT7  
TNFRSF14 CCDC59  
SP100 SUMO1  
PPP2R5E BHLHB9  
IRF1 CREBBP  
YWHAZ FHOD1  
PRKCZ F11R  
RANBP2 UBE2I  
NGFR PTPN13  
DNM2 DYNLL1  
EIF3H TNIK  
SIRT1 BHLHE41  
GCG CPE  
NCR1 CD59  
RPN1 SIGIRR  
CDC73 WWC1  
CDC25C YWHAZ

ITGAV MMP14  
BTF3P11 THBS1  
NGFR TRAF2  
CDC25A FBXW11  
CTCFL PRMT7  
PPP2CADVL3  
WISP1 BGN  
GNAI2 ADORA1  
HGS PIK3R1  
HSPB1 SRRM2  
YWHAB EFTUD2  
AP1B1 ATR  
CENPF ALK  
QARS PHLDA3  
WDR33 ZHX1  
FYN RIMS2  
EEF2K MAPKAPK3  
IKBKB NCOA3  
SOX2 NR5A1  
P4HB TAP1  
PLEK TGFBR1  
RIPK2 RPL36  
MAP1B RASSF1  
ATP5J2 CCDC137  
SMAD9 TMEM57  
PPARG DNTTIP2  
ETFB IKBKE  
UBE2I LNX2  
ATXN7 PSMD7  
CCT8 ACTB  
ID3 ELSPBP1  
FYN DNM3  
AKT1 BRCA1  
PSMC3 PSMC3IP  
SMAD1 INGX  
SNRNP70 SF3A2  
LCK ESR2  
SERPINB9 CCDC90B  
VHL VPS35  
USO1 EEA1

FOXA3 ALX4  
EWSR1 NBPF3  
P4HB YWHAG  
MPDZ NR4A1  
ADAM15 SH3PXD2A  
PLD2 MTOR  
BUB1B ZWINT  
GRIN2B MIB2  
SF3B4 SS18L1  
RNF8 TP53BP1  
SFN ZNF638  
EZR PRX  
UBTF CREBBP  
TNFRSF1B POTEKP  
HLA-B RCC1  
PSMD11 SUMO2  
RFC1 MYOC  
MAPK1 PPARA  
POLR2E USP11  
HLA-B CAPRIN1  
CFTR SLC4A7  
CENPA PHIP  
ORC1 CDC6  
RAF1 HSPA4  
PPP4C MAP4K1  
CD247 PI4K2B  
IL8 SDC1  
SFPQ NR4A2  
HSP90AB1 ACTN1  
HNF4A PCBD1  
PTP4A3 NCAPG  
PIK3C2B NCK1  
ACACB HLCS  
TRIP10 WBP11  
SMAD7 YAP1  
EIF1B EIF2S3  
PLCG1 TRPC3  
CDKN1C SKP2  
NR3C1 UBE3A  
UBE2D1 TRIM17

EEF1A1 BBS4  
LAMB1 GF11B  
IPO7 USP49  
PFN2 DLST  
JUND YY1  
TCF4 RUNX1T1  
EFEMP2 COL8A1  
CCBP2 CCL8  
IL25 IL17RB  
GEM PDLIM7  
NXF3 NXT1  
CHAF1A DBF4  
HOXC11 CD2AP  
PPP1R15A CUEDC2  
PSME3 KIAA1267  
USP4 NOLC1  
CAV3 GNAS  
TSR1 PRKAB1  
UBE2N RC3H2  
MBP TRAF6  
MYH11 DAXX  
UBE2U RNF150  
USP12 USP46  
ACTN2 DLG1  
SPI1 MUM1  
PIP5K1C AP2B1  
SMARCA4 CDX2  
STAT1 NMI  
DDB1 PHIP  
LNX1 IGSF5  
SATB1 EP300  
CST6 CTSH  
NOL3 NIF3L1  
RPA1 SELENBP1  
PTP4A3 MSH2  
DDX5 ESR2  
RAF1 GNB2  
C8ORF33 HAP1  
HAP1 BARD1  
MAPK1 MCL1

WDR82 CXXC1  
SNRNP70 SRSF1  
SF3B1 WWOX  
GMFG FBXL15  
PCBD2 HES4  
SMAD4 UBE2I  
PIGA PIGP  
MAL KDM3A  
EZR TBC1D10A  
CCL21 VCAN  
APC2 ACTA1  
TEC IKBKG  
CRK PCDHA10  
SUV39H1 PRDM1  
UBE2K BIRC7  
JAK1 PLAU8  
JAK2 NFKBIA  
FURIN GORASP2  
AGT EWSR1  
DDA1 NANS  
CANX HTR3A  
GJA1 CSK  
MYC MAGED2  
CIAO1 GNL3  
MYC MYBBP1A  
APLP1 MPHOSPH6  
SYNCRIP HABP4  
CDC42 ARHGAP27  
ELK4 ID3  
DLG4 MAP1A  
TBP EMID2  
EPHA1 ALK  
MTNR1B PDIA6  
DSTN TESK2  
TXNL4A RHEBL1  
CDC42 CD163  
PDE6G DNM2  
DNAJB6 TSC22D1  
RALBP1 GTF3A  
SUMO1 SENP2

FXR2 MEAF6  
CTGF LRP1  
ERBB2 SLA  
CNBP CUX1  
BCL2 PMAIP1  
EGFR TMCO3  
LAP3 TSG101  
HSPA4 DNAJC3  
BUB3 SF3A2  
SLC9A3R2 LPAR1  
KRT1 PI3  
IKBKE TMED9  
MAP4K4 CASP8  
ZNF496 SSX3  
MAP3K7 DDX5  
EPRS MAP3K14  
SIN3B SAP30  
UBE2D3 CADPS2  
HGS CEP55  
PTPN6 SSTR2  
HLA-B ARL1  
HNRNPF SUMO1  
KLC1 KIF5A  
TNFSF12 AGGF1  
SOAT1 MPG  
MED7 FXR2  
GTF2A1 DOCK7  
SELENBP1 USP33  
MYC MLH1  
BIRC5 CDK2  
VAV1 PRKCQ  
KRT15 SMARCD1  
APLP1 TSC22D1  
TUBA1A DNMBP  
EDN1 KEL  
STAT1 TRIM28  
ADAM15 ARHGEF6  
COQ9 ANO8  
NR2F6 CBX1  
HGS NEDD8

CCNE1 PIN1  
PLCG1 DGKZ  
CDC42 C14ORF1  
CHD3 SIRT6  
CTBP1 RCOR1  
ARNT EPAS1  
CDKN2A DAXX  
GRIN2B CAMK2D  
GRIN2B CAMK2B  
HCK PLCG1  
GRIN2B CAMK2G  
EGFR LRSAM1  
PLS3 ATXN2  
MGMT PRKACA  
RASGRP2 FAM118B  
USP13 SMC3  
CDKN2A KIAA1984  
LIMK1 NRG1  
THRB FOXO1  
CSF2 CSF3R  
NGFR TRAF6  
RPAP2 PRPF31  
PLCG1 GRAP  
CCKAR PPP1R9B  
ESR1 SUMO1  
EMD CTNNBIP1  
GABBR2 SH3GL3  
TNFRSF10C FAM101B  
CFTR PRKCA  
MAGEC1 H2AFZ  
PPFIA1 GIT1  
PTBP1 FUS  
PITX2 HERC5  
CCNA2 HERC5  
UBE2D1 RNF114  
RORA NCOA2  
CUL4A DDIT4  
TEX11 COL20A1  
CCNH MTA1  
IGHM PTK2



FAM40A CTTNBP2NL  
TNFRSF1B CSNK1A1  
FOXG1 SMAD1  
WWOX CPSF3  
FOXG1 SMAD2  
ESR1 MED13  
ZNF638 KRTAP4-12  
GNB2L1 COPS5  
NR2F6 NR2F2  
CACNA1A GNB1  
CELF3 SOBP  
USP1 ATAD5  
YWHAG PNN  
COPS5 CARD11  
MYH9 IKBKG  
DMAP1 ING3  
SUPT5H DCAF6  
HNF4A MED17  
UTRN MARCH5  
ATF3 NUF2  
PGR PRMT2  
HCLS1 IKBKG  
CCNA2 CDT1  
RFC4 RUVBL2  
PPP3R1 CABP2  
CNTFR APPBP2  
HERPUD1 UBQLN2  
ANXA2 TNIK  
NUP160NUP43  
RHOA RHOH  
NR1I2 PPARGC1A  
VCAN PLA2G2A  
HSPA9 YWHAZ  
ORC3 MAP4K1  
FOS CYP27B1  
PPP1R9B DAXX  
PSG3 ATF7IP  
UBE2D2 RNF4  
DLG3 EXOC4  
SMAD2 LHX9

POP7 HSPB1  
RPS6KB1 AKT1  
SNX3 CRK  
YY1 SMAD1  
NCK1 PTPN4  
RPA1 MCM4  
YY1 SMAD2  
TP53 BRE  
CASP14CASP4  
HDAC4 RUVBL2  
PLG PAPP  
RER1 HAP1  
CREB1 HIST1H3J  
CEBPB SPI1  
SMAD2 PPAN  
CHD4 BCL11A  
DAPK1 IKBKG  
NDUFB8 PIM2  
TFE3 TRIM28  
KIT RASA1  
PCNA CHTF8  
AMH PCSK5  
PHF2 RBBP7  
ESR1 GNAI1  
MTOR RAP1A  
NRIP1 NR5A1  
NFKB1 KPNA1  
SYNJ2 SFN  
GRK6 LTB4R  
MYH9 MYH10  
PIK3R2 TGFBR2  
RFXANK PHLDA3  
PPP1R14A CSNK1G3  
CHEK2 ATM  
FUS SARNP  
CAPNS1 RAB1A  
ETS1 ZMAT2  
RFC1 CHTF18  
MYC SMAD3  
PPP1R2 PPP1R9B

UBE2I RUVBL1  
ARPC2 ARPC4  
AURKAPLK1  
HLA-DQA1 APLP1  
CRMP1 TRIP13  
CCND1 MCM10  
BMX GAB1  
CD19 BTK  
TRIM37TRAF1  
YWHAZ SMC5  
IL1R1 PIK3R1  
ARAF MLH1  
CUL3 KLHL20  
LONP1 LOXL4  
FBL ARRB2  
PCNA CDC6  
RUVBL2 PRKAB1  
NAA38 TALDO1  
NFKB1 HNRNPM  
SEMA3F UBA1  
RAD23A EWSR1  
MLL SMARCB1  
SMAD2 ANP32E  
PDIA3 EFEMP1  
KIF20A RAB6A  
YWHAZ SAMD4B  
STK25 PPP2CA  
EIF4EBP1 RHEBL1  
PAK1 MYNN  
HLA-B TXNDC17  
GRB7 MAP3K14  
CCT6A TBK1  
GRIK1 LGALS12  
RIPK1 HSPA1B  
FGF1 CSNK2A1  
RELB HSPA1B  
RPS29 GRB2  
PRKCA ADD3  
NFYC UBQLN1  
PIK3C2A ANKFY1

KBTBD10 SLC2A4  
NPHS1 TJP1  
CAPNS1 GNB2  
SNRNP200 YWHAB  
ACVR1B ACVR1  
PSMD11 SMAD2  
PSMD11 SMAD1  
RPA1 MCM7  
EGFR APBB2  
PPP4C PPP2R5D  
LPA CELA1  
CTLA4 PTPN11  
PHB SCN8A  
PRKCG STXBP1  
HCLS1 CASP3  
RBL2 LIN37  
HAP1 DDX49  
MAP4K1 DAPPI  
RAC3 NRBP1  
RPS6KA1 ASCC2  
PRNP ADAP2  
TP53 RPA1  
PCNA BARD1  
TP53 APEX1  
HIST1H4I BRDT  
EPB41L2 FKBP2  
RGS12 NPY2R  
CNBP HNRNPAB  
HCK SH3BP1  
SF3B1 ATG12  
CAV3 JPH2  
VPS28 ASF1A  
RAD23A XPC  
NCOR1 ACTN2  
STAG1 TINF2  
GALR2 GNAQ  
APLP1 PHF10  
TP53 APTX  
GSR PJA1  
CREB1 PIAS3

INSR VAV1  
YY1 RUVBL2  
SMARCA2 SMARCD3  
PARK2 HEXDC  
ATP1A1 GTF2F2  
DNM1 CLINT1  
MAP2 PRKACA  
RFC1 CASP3  
APC ODF2  
SLC25A4 NFKBIA  
SRC ARHGAP32  
APBB1 CHERP  
CENPB ETS1  
PCNA RBBP8  
VIM SRRM2  
TNFSF9TRAF1  
TPR NUP153  
CCT3 SH3BP4  
PHGDHCHMP2B  
TOP3B ZFPM1  
DHPS EIF5A  
DLGAP1 SHANK1  
EIF4B SFN  
MAL SUPT16H  
IKBKB IKBKG  
CCBP2 CCL7  
ZNF263 EFEMP2  
CFLAR MAP3K14  
FOXO1 DYRK1A  
RAC1 EPS15L1  
CDH5 KDR  
CDC42 KTN1  
SUB1 PINX1  
YWHAZ IKBKG  
SMAD1 WWP1  
ARHGAP1 TAX1BP1  
APC NUP214  
TRIM23FXR2  
UQCRC1 SRPRB  
AIRE PABPC1

BMPR2 FHL2  
RPLP2 YWHAZ  
CRKL BLNK  
PPP2CAISYNA1  
CDK5RAP2 MAGEH1  
RZR2 WNK1  
UBA1 GAN  
SGK1 PDPK1  
TOP2A XRCC5  
MET PTPRJ  
TOM1L1 MAP4K4  
SUV39H1 SMAD1  
MCC PAFAH1B2  
YY1 RUVBL1  
ARL4D UBR1  
PTN LAMA4  
CRK PCDHA2  
CSNK2A2 SMURF1  
UPF3B UPF2  
TAP1 COPG  
LGALS8 ITGB1  
NGFR SALL2  
NRP2 SEMA3F  
CRK PCDHA5  
UBC XIAP  
CRK PCDHA3  
CRK PCDHA9  
TP53 DHCR24  
UBE2D3 MARCH3  
AP2S1 GRB2  
SSB NCL  
TP73 HIPK2  
FOS RPS11  
NACA FUNDC2  
APBA3 PSEN2  
USP53 C7ORF36  
SERPINA3 KLK3  
AIRE CRK  
TP53 ZMYND11  
IRS4 PIK3R1

HNRNPM PHLDA3  
NFYB ELF1  
YWHAZ MAP3K4  
SFPQ NONO  
NLRP4 NLRC4  
PIWIL4 DICER1  
CRKL DOK1  
RB1 CEBPD  
PPFIA2 PTPRD  
INSR ADRB2  
KLHL12 VTA1  
SNX2 SNX4  
NUAK1 CASP6  
ESR1 BAZ1B  
TP73 DPH1  
PPFIA2 PTPRG  
OTUD7B ACAD9  
FYN RRAS  
EXOC3 BIRC6  
TXN FBXO11  
ADCYAP1 CASP2  
DDX5 HNRNPH1  
CDH1 CDH3  
HDAC2 FOXP3  
CTNNB1 TGFBR2  
KRT15 CCDC101  
ARG1 USP53  
CHEK2 PPP2R5C  
CDK1 BRCA2  
MTA2 HDAC2  
PPIH USP4  
ARHGAP1 SMARCD3  
DES SPTAN1  
SMARCB1 CDX2  
PRKCG GJA3  
CALM2 JOSD1  
NUDT3 RPL8  
CALCOCO2 ZNF638  
EIF4G3 CAMK1  
TP53BP2 UTP14A

PTN PTPRZ1  
CDK5R1 TTBK1  
H2AFZ CHD1L  
TNFRSF1B SSR4  
PLCG1 SPEN  
SEPP1 PTK2  
GAPDHHSP90AB1  
INS INSR  
CSF2 IL3RA  
IKBKB MAP3K3  
RAB6A GOLGA4  
CHEK1 TLK1  
SREBF1FBXW7  
BMX PTK2  
CALM2IQCB1  
CD8A LCK  
FSHR RPS27A  
PPP2CAPPP2R5D  
HBXIP GPRASP1  
TP73 TP63  
HGS SMAD2  
TLX1 PPP2CB  
SRP54 RNPS1  
RPA1 RPA4  
CREB1 PRKACA  
FSHR RPS27A  
HNRNPA1 SF3A2  
HNRNPA1 SAFB  
HSPD1 RPAP1  
KRT5 DSPP  
CTNNA1 PSEN1  
PRKCZ TRAF6  
JAK2 UBASH3B  
YES1 ZNF512B  
KDR PTPN11  
TNFRSF1B FANCD2  
SKA1 SKA2  
GMNN CDKN1A  
TRAPPC3 TRAPPC6B  
PFDN6 PRPF4



NFYC ZDHHC17  
ATXN1 MYEF2  
COLEC11 SRSF3  
MBD4 DNMT3B  
TOP1 SFPQ  
KCNH4 UBE2I  
TP73 NFYB  
KRT33A CDC20  
CASP1 CARD8  
PPARA NCOR2  
CCNK TSC22D4  
RAD23A SQSTM1  
PRNP MAG  
HDAC2 SAP130  
SFN RND3  
RARA SAP130  
INPPL1 BCAR1  
ACVR1 TTC17  
MDM2 MRPS33  
AGT EWSR1  
SGK1 RPS27A  
ARRB2 PRPF4B  
RHOQ RAPGEF1  
NR5A2 NCOA3  
IFIT5 ECSIT  
MDM2 BTRC  
FOXH1 GRB2  
KLK10 INSL6  
EEF2K MAPK14  
HTT SIN3A  
SGK1 MYH1  
AKT2 MTCP1  
PMS1 RNF20  
SMAD2 IL1RAP  
NTRK1 PTPRC  
TP53 RBBP5  
CHD3 DPEP2  
SKIL PSMC2  
AKT2 TCL1A  
RPA1 CHAF1A

CCDC33 USHBP1  
H3F3B SUPT16H  
PTPN21 AKAP1  
HDAC3 EMD  
NR3C1 ATP1B1  
ERBB2 MAPK8IP2  
XPOT TNFRSF1B  
TP53 KIAA1267  
CUL4A DCAF16  
LCK PTPRF  
HDAC3 BUB1B  
CEP110 CETN2  
CCL2 DARC  
DDX5 DDX17  
CIAO1 RPAP1  
IRF1 KAT2A  
IRF1 KAT2B  
HNRNPR HNRNPA1  
SS18 CNOT2  
VAV2 BOD1L  
YWHAZ CLIC4  
MITF PIAS2  
MITF PIAS1  
DAND5 HTT  
FGF2 FGFBP1  
SMAD4 ODZ3  
PFAS TNFRSF10D  
DNMT1 HELLS  
DAND5 SREBF1  
SRC STAP2  
SYT7 STX3  
SPOP PDX1  
STK4 RASSF6  
ATXN7 PSMD2  
INO80 UCHL5  
ARPC3 ARPC4  
POLL MUTYH  
NFKBIB RASAL2  
NOS2 RAC1  
RORA MED1

HNRNPA1 LARP7  
POMC MC2R  
LNX1 CUTC  
STAT1 FADD  
TRIM24UBE2U  
MLLT4 PVRL4  
PRKAR2A AKAP12  
PPID SMURF2  
CRK MAP4K5  
APIG1 SPTB  
YWHAB KCNK9  
MARCKS CNOT8  
RDBP VAMP3  
EGFR CLTCL1  
STAT1 KPNA1  
PCNA CHTF18  
RBBP6 ACOT13  
NOTCH1 EP300  
NFYB GRB2  
AQP1 CCDC85B  
PCNA APEX2  
ADCY6 ATXN1  
PABPC1 UPF1  
NEUROD1 HAP1  
HSPB1 MAPKAPK5  
RAB11A WDR44  
TRIP10 DAAM1  
CDK2 MCM4  
ITGB1 PLAUR  
NECAB2 TEX11  
EGFR CNTN2  
WT1 PAX2  
ACTB CPNE4  
NAA38 RSL24D1  
GSK3B SGK3  
FDFT1 RUVBL2  
PPP5C CHORDC1  
PRMT5 TYK2  
GDF11 ACVR2B  
HDAC3 NCOR2

YWHAE NGFRAP1  
MRPS34 DDX56  
VAV1 BLNK  
UBE2L3 RNF125  
OPRD1 GPRASP1  
IRS1 CRK  
UBC MYC  
PSMC2 PSMC5  
CHD3 TNFRSF14  
SNX3 STX11  
USP11 NET1  
CLU LEPR  
CRK GRB2  
SEC24DLMO4  
CDC34 EIF3K  
EIF1B GDI2  
PPARG SMARCA4  
FBL C1QBP  
NPR1 NCSTN  
IKBKB AURKA  
CSDA MAPK1  
TRIP6 FAM124B  
CPLX1 STX1A  
TRIM37TRAF3  
CD22 PTPN6  
SKI SMAD5  
PPP2CBLCMT1  
ALPP GPLD1  
CD22 SHC1  
TAF6 TAF5  
TAF6 TAF13  
POLR1C WRN  
TAF6 TAF11  
TAF6 TAF7  
SMARCA4 MPHOSPH6  
ZRANB2 SRSF2  
HERC2 ZRANB1  
HTT PACSIN1  
MAGEA11 MLF1  
GDI1 PSEN1

U2AF2 RBM17  
COPA SACM1L  
SNAI1 EZH2  
S100B AGER  
TFRC ACAP1  
PSMD2 ATG4C  
TUBB4 TAB2  
RUVBL2 TAF9  
LRMP WNK1  
NR4A1 HSPH1  
TAF10 TAF9  
FDFT1 RUVBL1  
SRC RPL13  
CUL2 KLHDC10  
ACAN MMP8  
PLCG1 PICALM  
CRKL NOTCH2  
KCNJ6 KCNJ3  
WIPF1 FYN  
C3 CPN1  
UBC NFATC4  
TNXB VEGFB  
UBOX5 UBE2L3  
RHOA SMAD2  
LRRN1 SIN3A  
GLI3 MED12  
ATN1 RBM10  
PIK3R1 SLC23A1  
CSNK2A2 SNCA  
SRRM1 BCLAF1  
AHCY YWHAZ  
LCK PTPN11  
SMARCD1 CARM1  
PCNA POLQ  
BUB1B CDC16  
ID3 PAX5  
CBX7 USP7  
EGFR NRG1  
KEAP1 KIAA0564  
MSH3 EXO1

RQCD1 RUVBL2  
ATN1 LRP2  
MGEA5 DHX9  
ATP2B4YWHAE  
PLCG1 TNK1  
RPL7 MAP3K1  
DTNB SNTG1  
ATXN1 KLHL8  
HTT KIAA1377  
IMPDH2 PIAS4  
SND1 UBA5  
AKT1 ESR2  
MAGEB2 RPS9  
USP45 TMOD3  
DPM1 PTP4A3  
ATN1 HSPG2  
MARCKS PKN1  
TP53 C4ORF41  
DDB2 CDT1  
RNPS1 ZFP91  
NRIP1 CTBP1  
PLCG1 GAB1  
PRKCA ATP2B1  
KRT5 PKP2  
KIF1B SNTA1  
MAGEB2 RPL28  
CTNND1 CTNNA1  
CTNND1 CTNNB1  
IRAK2 SMAD2  
BRCA1 MED21  
RAE1 DDX24  
GTF3A OPTN  
PTP4A3 LTN1  
GSTP1 MLH1  
TWF2 ELOVL1  
HNRNPL ILK  
ABL1 JAK1  
NCOA2 CARM1  
MEN1 SMAD3  
FLNA PAK1

GLUL CASP8AP2  
SOS1 SNX13  
SREBF2CASP8AP2  
PARK2 RGS3  
PARK2 RANBP2  
TUBB SUMO2  
GNA15 RGS2  
MPRIIP PPP1R12C  
INSR GRB10  
UTS2 UTS2R  
CBL ARHGEF7  
ITPKB CALM2  
PCBP2 RUVBL1  
COL4A2 ATF7IP  
HDAC4 UBE2I  
KEAP1 MAP1LC3B  
COPG2 MAGED1  
CLCN5 WWP1  
PTK2 MAP1A  
COPG2 COPG  
TNFAIP3 PPP6R3  
MYC PLS3  
ABL2 RIN1  
HNRNPK RBM42  
SPI1 DNMT3A  
CDC42 PAK2  
POLA2 KLF6  
MRAS BRAF  
PRKCD RASGRP3  
PAFAH1B2 PARK2  
ESR1 HDAC4  
TSC2 RABEP1  
PTPRG ALK  
C5 C7  
INHBA ACVR1  
GSK3B FRAT1  
GABARAP FNBP1  
CHD1 HIST3H3  
PSEN1 PLXDC2  
HNRNPK DIDO1

HIST1H3J HDAC2  
SUMO2 TRAF1  
YES1 ITGB4  
SKIL SMAD2  
NCOR1 RXRA  
SKIL SMAD1  
ARHGEF15 EPHA4  
SOS1 SNX9  
MTCP1 EWSR1  
TNFRSF10C APOA1  
MMP2 EPHB2  
NFKB2 RELA  
BRCA1 HDAC1  
EPB41 HIGD1A  
EEF1D IKBKE  
GIPC1 RGS19  
TUBB YWHAG  
SELP AP1M1  
UBC CSF3R  
HIST1H3J CREBBP  
CDC42 PAK1  
HIST1H3J MYST3  
GNAI2 LHCGR  
ZNF24 ZBTB16  
STX1A STXBP6  
HDAC3 BCL3  
PLCG1 AFF2  
LPL LUC7L2  
UNC119 UBE2I  
CALM2 PTH1R  
PSMD3 UCHL5  
PDPK1 PTPRJ  
MAF HOXD12  
PCBP2 RUVBL2  
LIN7A CASK  
EPB41 PIN4  
DACT1 LEF1  
CTBP1 FOXP1  
EWSR1 BLZF1  
DTNB PRTFDC1



TNIK PSMD13  
UNC13B VAMP2  
BRD4 RFC1  
BRD4 RFC2  
JAK2 PTPN1  
PTP4A3 KIAA0776  
TOM1L1 PWP2  
ITPKA ACTA1  
NTN1 ADORA2B  
FOS NCOR2  
SHOX2 KDM5B  
TOP3B GRN  
ERBB3 PTK2B  
SRC MKI67  
RPL37AMAP3K1  
KRT20 PPAT  
ECSIT AP1M2  
CRYBB2 CRYBA4  
GLRX ATP7A  
HNRNPA1 RIPK3  
CRYBB2 CRYBA2  
SS18L1 SF3B4  
COPA STX8  
ETV6 UBE2I  
GAPDH TXN  
COPS6 COPS7A  
WBP4 SF3A3  
NUP107NUP37  
LSM3 LSM2  
LDOC1 MZF1  
RNPS1 BCLAF1  
NUP107NUP43  
WRN WDR48  
CUL1 FBXW7  
ARF1P1 PIP5K1A  
EIF2AK2 JAK1  
PTPRG TIE1  
BRD4 RFC4  
CALM2 MAP3K3  
BRCA1 ATR

RNMTL1 PRKAB1  
YWHAG ARHGEF16  
GREM1 BMP2  
ERC2 MYB  
XPO4 PHLDA3  
FLNA PSEN1  
RAB2A ZFYVE20  
HDAC4 DNAJB8  
ZBTB25MDFI  
CTBP1 IKZF4  
ATP6V1C1 ARF6  
CBLN3 CBLN4  
PLIN3 M6PR  
STAMBP CTNBL1  
PHACTR2 SRC  
PRKCI SPATA18  
FOS USP16  
MYC CDK8  
ITGA2 CD9  
EP300 GPBP1  
DVL2 ARRB2  
ATXN7L3 SERTAD1  
ADRA2B PPP1R9B  
YWHAZ MARK2  
LIG1 MRE11A  
PSMD11 HAP1  
APOE PDCD4  
CDC42EP2 CDC42  
SHC1 ALDH6A1  
GAS7 PACSIN1  
IRX5 APLF  
VWF ZNF512B  
ZBTB8B AP2M1  
TOM1L1 CWF19L1  
AHCYL2 TRAF6  
PDPK1 RALGDS  
ITGB1 CD63  
MMP16 KISS1  
FGFR1 SLA  
TNFAIP3 CNKSR2

IFRD2 G3BP1  
RPS27AZNF512B  
FAM160A2 AKTIP  
ARF6 EIF3I  
COPS5 C12ORF10  
CDC40 SMAD2  
USP49 DICER1  
SRGAP3 FASLG  
NR4A1 KAT2B  
FLNB TSHR  
TCF4 RPS27A  
CTBP1 PNN  
CBR1 HLA-B  
CASP8 RYBP  
MAP1S RASSF1  
EXOSC9 EXOSC8  
MED28 MED31  
CSRP2BP MBIP  
MCM6 CDT1  
PHYH ABCD3  
RB1 STAT3  
GATA2 HHEX  
TNRC6C EIF2C2  
RB1 E2F1  
GTF2A1 MKX  
FXR1 GIGYF2  
LDLR APOB  
TLE4 OTX1  
EP300 CARM1  
TLE4 OTX2  
POLR2C POLR2F  
P4HB COL1A2  
EIF5B ZBTB3  
RUNX2 MYST4  
BCL2A1 BAD  
HTRA2 CSN1S1  
HAND2 HEYL  
TP73 N4BP2  
SETDB1 INSL6  
GEMIN6 GEMIN7

SPINK1 ELN  
AIRE PARP1  
FCGR2B LY6E  
ARID1A PGR  
ENC1 CUL3  
SLC38A1 TMEM66  
ELAVL2 NR2E3  
ARNT EP300  
SPOP ZBTB16  
CYB5B MCC  
IKBKB HNRNPU  
PPP2R1A PHB2  
TCF4 TAL1  
SYNJ1 NCK1  
ABI1 NIN  
PAX9 ZNF440  
ABI1 MINK1  
ZBTB24STK24  
RAC1 RTKN  
TXNL1 SUMO4  
PPP2CBIGBP1  
TRIP13 ZNF655  
AP1B1 ATM  
YWHAG RACGAP1  
CALCOCO2 LNX1  
TRIM37BYSL  
CCNE1 BRCA1  
MGEA5 A2M  
TRIM32UBQLN4  
TADA3 FAM107B  
IRF9 DMRTC2  
F2R GNA12  
FLNA PAK2  
DVL2 ZBTB8B  
YWHAG TMEM102  
XRCC1 BRCA1  
RGS20 TXLNA  
NFKB1 MAP3K8  
BCAR3 NEDD9  
RAF1 GNG4

ARF6 PABPC4  
VHL HAS1  
STX7 VTI1A  
CUL2 ASB4  
GRK5 GIT1  
MED30 MED13  
DAND5 TAL1  
INHA ACVR2A  
APC TPM4  
A2M LYZ  
CSF2 SDC2  
SMAD2 RASD2  
GDF9 FOXG1  
AZIN1 FANCA  
RAD51 DMC1  
PCBP1 TSC22D1  
GCC1 NINL  
PFN1 DBN1  
TALDO1 ZHX1  
RPN1 C20ORF94  
CASP8 PEA15  
SMARCA5 BAZ1A  
TG CTSD  
CDC42 UBR1  
ZNF253 AKR1B1  
STAC LIMD1  
NR4A1 TRIM28  
STXBP3 STXBP2  
ULK1 MAP1LC3C  
CRNKL1 DISC1  
RARB NR4A2  
CSE1L GRB2  
VAMP2 TRPC3  
H2AFX HIST3H3  
KLC1 KLC2  
GCC1 AMOTL2  
XPO1 NMD3  
DAND5 BCL11B  
MAP2K7 MAP3K5  
CTLA4 AP2M1

PAEP INSL6  
RGS2 GNAS  
HNF1A TLE1  
JAK2 VCP  
MEN1 WDR5  
LTA LGALS2  
ABL1 EPB41L3  
POLR2B POLR2G  
RUNX1T1 TAF9B  
VHL SMARCC1  
TP53 USP39  
NEBL MED28  
ATP2B4NOS1  
LDOC1 FAM193B  
TEAD4 CCDC85B  
NCBP1 GSTK1  
CTNNB1 HIC1  
SMAD3 SIN3A  
UNC119 UBQLN4  
HSPA4 GRPEL2  
PTEN UTP14A  
GPS1 COPS6  
ESR1 AHRR  
SLC2A4RAB7A  
PAK1 CTTN  
ETS1 POU1F1  
MAPRE1 TRAF6  
KPNA4 KPNB1  
EIF4A2 SMAD2  
MAPK1 MAP2K1  
TIMP2 PSAT1  
STK25 PTPN13  
CDC16 ANAPC11  
EWSR1 CFDP1  
PLXNB1 MET  
TDP2 ETS1  
ENO1 ACHE  
TBPL1 TAF5  
JAM2 JAM3  
PIK3R1 BRPF3

HSPB1 DMWD  
SRF SMARCA4  
MDM4 CHEK2  
CBX5 SMARCA4  
PIK3R4 UVRAG  
CALR LRP1  
PPARG ASH2L  
ARF6 RUVBL2  
TNNT1 PLEKHF1  
HSPB3 FAM127B  
CTNNB1 DSC3  
TOLLIP RBM38  
VHL COPS5  
MXD4 C21ORF77  
GDF9 KIF22  
SFN MAGI1  
YWHAG KLC2  
SOS1 CD2AP  
PVR DYNLT3  
PIAS4 SERBP1  
DSC1 PKP2  
HSPA1B DNAJC3  
VASP NSMAF  
ARF6 RUVBL1  
SHC1 TGFBR2  
ARR3 CLTC  
PIK3R2 MED28  
VHL IARS  
GJB1 JUP  
SRRM1 STAG2  
UBE2H MKRN3  
APP COL4A3  
REL FKBP5  
ARRB2 CSNK2A1  
STX6 VPS18  
PPL PPHLN1  
CKS2 EEF1A1  
YARS ARF6  
TRMT112 TRAF6  
POLB PCNA

ARF6 TRIM28  
PCBD1 PAPOLG  
TRAF3 RIPK1  
MTA2 TOP2B  
NR2F2 HIPK3  
STAT3 SMAD1  
IVL EVPL  
TAF1A HIST2H2BE  
TCERG1 CYFIP2  
TRAF2 FATE1  
PAX6 HIPK2  
GNAO1 RGS1  
PLK1 BTN1A1  
PAK2 DOCK2  
IFIT2 TMEM173  
RPA1 PRIM1  
RPA1 PRIM2  
ATL2 ARL6  
PHB MAP3K10  
GNAI2 RGS18  
PIK3R1 VAV3  
BIN1 FBP1  
BAX MEPCE  
KLF1 CREBBP  
PMS1 MOV10  
EIF4G3 PABPC1  
EIF3F MTOR  
RTN3 PLEKHF2  
SNAP29EHD3  
ETV6 SKP1  
PSTPIP1 C10RF9  
DYNLL1 CHD6  
RWDD4KCTD17  
RBBP8 WDYHV1  
SNRNP70 SNRPC  
EIF4A2 EIF3L  
HBP1 EFEMP2  
GRB2 DNM1  
MDM2 PRRC2C  
PTPN6 LIFR



CCNH FUBP1  
AES PTRH2  
DYNLL1 NEK9  
PRKACA NIN  
RAC1 VAV3  
ESR2 DDX54  
MAP2K7 DUSP19  
HSPB1 YWHAZ  
RFC5 EEF1A1  
SUMO2 CHAF1A  
SUMO2 CHAF1B  
PPARG PPARGC1A  
EEF1D CRMP1  
SOCS6 PIK3R1  
HNRNPF NCBP1  
PTP4A3 OAT  
GRB2 CNTNAP1  
EIF1B EIF3L  
TSC22D1 CCDC59  
GRB2 DLG4  
TSC22D1 PTPLAD1  
GTF2A1 NCOA6  
EIF1B RUVBL1  
CDK5R1 CAMK2A  
EGFR S100A9  
WDR5 SETD1B  
DCAF10 SLX4  
ST13 PINX1  
OSGEP EMCN  
ACTC1 ABRA  
DNMT1 HDAC2  
LEP HK3  
CDC42 GCC2  
S100A9 TAGLN  
OMA1 PCDH18  
CALM2 GRK1  
ABCA1 CSNK2A1  
SERPINF2 KLK6  
RFC1 SSBP3  
THRB PPARGC1A

GRB2 RPP38  
PPARG SMARCD3  
KHSRP PTBP2  
UBE2E1 MKRN3  
CCL2 CDC6  
CALM2 LYST  
AES MED31  
CBFA2T2 ATN1  
ABL1 DLGAP4  
PRNP TSLP  
ACTA2 PRKCD  
PDGFRB PDGFD  
NCOR1 EP300  
HDAC2 RERE  
CCL2 MMP8  
MAP4K4 KRT20  
PABPC1 HLA-B  
SIN3A WHSC1  
BIRC5 XIAP  
GAP43 CALM2  
SUMO1 PDGFC  
ZFYVE9 NFKB1  
SYVN1 USP7  
CYTIP CYTH1  
CLINT1 MAP1LC3B  
CABLES1 TP63  
PAX5 DAXX  
UBC TOPBP1  
HOXB9 MDFI  
MTA2 MED30  
MYC PARP10  
APOA1 PDE1A  
TAF11 TAF8  
GRB2 CYP4F2  
UBE2K RNF125  
ZRANB2 U2AF1  
WDR5 PHF8  
LRPPRC PPARGC1A  
ATXN1 SPEN  
PSEN1 TRAF6

UBQLN2 RNF11  
ACTB MEPCE  
NSF KIAA1377  
COL1A2 BGN  
REL CREBBP  
KRAS RASGRP2  
TERT YWHAQ  
AR CCNH  
AP1AR GGA1  
SMAD2 MKS1  
CETN3 PDE6D  
LRPPRC UXT  
TUBB TRAF1  
PRKACA AKAP14  
SRSF3 SRPK1  
SNRNP70 CTDP1  
RPL5 KPNB1  
PAFAH1B3 HSPH1  
GRB2 SH3BP2  
NLGN1 NRXN3  
BRF1 GTF3C4  
PPARG NLK  
GRIN2A DLG2  
KEAP1 SASS6  
IKBKAP CCT5  
PRKCA PRKCZ  
BARD1 MED17  
ADAM17 DLG1  
TG ASGR1  
CDC37 EXOSC1  
NLGN4X DLGAP2  
MAP2K7 MAPK8IP2  
MRE11A TERF2  
GNS NCK1  
VAV2 ARIH1  
RIPK2 IKBKG  
IGF1 ITGB4  
ARPC1A ACTR3B  
NRG3 ERBB4  
BAD NAF1

MYBL2 TTF2  
LYN BANK1  
MAGI2 CTNND2  
BRPF1 MYST3  
KLF1 SMARCC1  
PSMD3 BRF2  
PSMD3 TRAF6  
PARK2 HDAC4  
RAB4A ACTB  
HDAC4 SUMO1  
SH2B2 PDGFRB  
FUS RELA  
CBL YWHAE  
AR MDM2  
HSPA1L TANK  
MPG RANBP1  
ESCO2 RCOR1  
VAV1 ACTA1  
RAD54L EME1  
NR3C2 ACTG1  
CDC6 ORC6  
GCN1L1 C20ORF24  
PRKAR1A WNK1  
NFYB TAF12  
TCEB2 ASB8  
TFE3 ECHS1  
MDM2 WDR45  
EIF1B PSMA3  
HDGF SMAD4  
BRCA1 MLH1  
TFRC SVIP  
TERF2 SLX4  
ICMT RAC1  
E2F1 CDT1  
HLA-B CD81  
SMAD4 ZNF423  
TOP3A RMI1  
CALM2 MYLK  
TIRAP MYD88  
LRPPRC TNFRSF10D

DTNB DMD  
ETS1 ELP2  
CBL PTK2B  
JAK2 IL5RA  
PCNA LIG1  
ETV6 SUMO1  
KDM5BAXIN2  
PSMD10 NFKB1  
SPTBN1 EPB41L3  
PCP2 GEM  
AR NR0B1  
CALM2 TAB1  
SIAH2 DLST  
MAPKAPK2 MAPK14  
DAND5 CCND1  
SYK PTK2B  
RAB27A EEF1A1  
DNASE1 ACTA1  
FANCA KRT1  
CASK C16ORF70  
ATAD3B PNKP  
ABCA1 UGP2  
UBE2I SOX4  
SS18 NOP58  
TDG SNIP1  
F2RL2 F11R  
BTLA TNFRSF14  
PRKCQ PRKCZ  
PTPRN2 SPTBN4  
PTPN6 TLR10  
RET PLCG1  
TUBB MAP4  
SMARCA5 HIST1H4I  
CCT6A PPP2CA  
BAI2 SHANK2  
RBBP7 DHX30  
HNRNPUL1 C14ORF1  
BCL7B IKBKG  
ATP5F1 TRAF6  
UBE2D1 UFM1

HDAC1 NR2F2  
FOS NCOA1  
CUL4A COPS4  
ALG13 RERE  
HDAC1 RERE  
MT2A USP25  
TP73 UBE4B  
SKIL CXXC5  
NOD2 NLRC4  
AR SRC  
TXK CCR5  
FOXO3 YWHAG  
ARID4B SIRT1  
DNAJB6 PHLDA3  
PIAS1 TP53  
PRKCI SQSTM1  
RRM1 TNIK  
TPBG GIPC1  
NR5A2 PNRC1  
CD19 CBL  
NFKBIA TUBA1A  
FADD RIPK1  
CSNK2A1 IL16  
DVL2 ARR3  
FOS SMAD2  
HSPB3 LSM14B  
MCF2L2 MEGF10  
SLC2A4HADH  
VAV2 STK24  
TTI1 RUVBL1  
WAS PACSIN1  
ZEB1 DRAP1  
CSNK2A1 SSRP1  
CDC42 PRDM2  
FOS NCOA3  
GLUL UBE21  
SLC38A1 ITGA9  
DYNLL1 GRIN3A  
ORC3 GRAP2  
PTPN6 SIRPA

APH1A PSENN  
MYO1MYOCD  
UBE2E1 MAP3K1  
CASK CNTNAP2  
EEA1 HDAC6  
SHARPIN SHANK1  
MAPK8 MAP2K4  
CBL UBE2G1  
PRKACA USP49  
MYB PML  
UBE2H TRIM2  
TTI1 RUVBL2  
MAX PLEKHF2  
HDAC4 YWHAZ  
YWHAB YWHAG  
DERL1 AMFR  
PRKRA EIF2C2  
TRPV4 PACSIN2  
AR XRCC6  
CALM2 CSNK2A1  
HSPA1L OLR1  
APP SPON1  
PTPN6 SH3BP2  
MYOG MEF2A  
ACVR1 RASD2  
FLNA GRIK3  
MAPK1 IER3  
UBE2H TRIM5  
PCNA XRCC1  
CALM2 SMAD2  
TP73 KDM1A  
NUP98 KPNB1  
PDHA1 PDK4  
CDC37 PRKAB1  
CSTF2 SUB1  
SMARCA5 CHRAC1  
EGFR HOXC10  
MYC FBXW7  
CDK5RAP2 LUC7L2  
RXRA NR1I3

POU3F2PAX3  
FXN PICK1  
YWHAB SRPK2  
CCNE1 CUL3  
GP1BA OSGEP  
HMGA2SMAD1  
CCDC33 ZBTB8B  
SNRPD2 SRRM1  
IFNAR2CREBBP  
CCT8 YWHAZ  
HABP4 KAT5  
PCNA BAZ1B  
MYC GLUD2  
BRD1 KIAA1377  
PODXL SELL  
GLUD1 DYNLL1  
PSMA7 TIMP2  
RGS2 PRKG1  
PDHB SRRM2  
VHL HDAC2  
CBX3 SUV420H2  
CASK EPS8  
PCNA MUTYH  
SMARCA5 POLE3  
NCOR1 NFKB1  
WWP2 TFAP2A  
HNF1A AES  
CTNNB1 RBM39  
TARS HLA-B  
EIF1B COPZ1  
FLT1 CBL  
HNRNPM SRRM1  
OSTM1 RGS17  
HOXC8 BTG2  
CTNNB1 NEURL2  
CDK8 SMARCB1  
TP53 HECW2  
SMTN BRMS1  
FOS STAT1  
EGFR PTPN11



A2M B2M  
GSTZ1 GRB2  
UNC119 PTPRS  
PRIM2 RAE1  
SOX6 SUMO1  
CIAO1 SLFN11  
PDGFA SPARC  
FAM46A HTRA1  
KRT85 LYAR  
EPAS1 EGLN1  
APBB1 HTATSF1  
PTP4A3 NUP188  
ATN1 RBFOX1  
PTPRC EZR  
KLHL12 SNX20  
AKAP12 PDE4D  
OGT GSK3B  
MX1 TRPC6  
ST13 CD101  
VARS OTUD5  
KCNH4 TNRC6A  
PSMA4 CUL1  
TFPT RUVBL2  
CASP3 THAP11  
BLOC1S2 CNO  
GPS2 TBL1XR1  
KPNB1 LYST  
HTT DLG4  
PRMT2 HNRNPK  
ST6GAL1 CD22  
CASP8 RALBP1  
KLHL12 ARAF  
HNRNPL ITCH  
EEF1D DYNC1H1  
CPNE2 UBE2O  
DAPK3 PAWR  
CDC6 PPP2R3B  
SNRPB DHX9  
SMAD3 PLAG1  
SYK CTTN

USP13 MYO15A  
SYK SELPLG  
HNRNPK RBM41  
STK3 RASSF5  
VPS4B VPS4A  
GNA15 OPRD1  
TGIF1 EEF1A1  
TAF7 IKBKG  
MET VAV1  
DMWD SUCLG2  
GNA15 OPRK1  
PTGFR PTGER2  
CUL2 SH3GLB1  
EIF1B REXO2  
ANK1 TTN  
ABL1 SH3BP1  
UBOX5 UBE2W  
JUND BATF  
MED1 PPARGC1A  
SIRPA PTPN11  
BCR PIK3CG  
BCAR1 SH2D3C  
DTNB UTRN  
PPP2CB CCT2  
TG P4HB  
ITGB2 PRKCB  
ACTB NCALD  
CUL1 FBXW5  
CAPN1 SYNE1  
CDAN1 ASF1B  
HIST1H4I SIRT7  
EIF2AK2 DNAJC3  
MAP2K3 TAOK2  
CBX2 KRTAP4-12  
PHF2 EED  
APC CSNK2B  
MYC BRCA1  
RARA FOXO1  
HSP90AB1 PPP5C  
ARPC2 RAC1

SSR1 EEF1A1  
SRGAP3 TNIK  
BAX IRF3  
RPS15AELF5  
KRT18 PNN  
NPM1 HIST1H3J  
VAPB VAPA  
TRIM29JAKMIP2  
ACTA1 NEXN  
CDKN1A TTLL5  
BTF3P11 FN1  
BAI2 GABPB2  
SIX6 AES  
BIN1 ATXN2  
CBX5 MECP2  
MED28 MED16  
XRCC6 RRAS2  
STX6 MARCH2  
KIAA1377 ODF2L  
SMAD3 RANBP9  
PML KLHL20  
CD3E SHC1  
SMAD3 ERBB2IP  
CALML3 MYO10  
WDR62 MAPK9  
TACC1 BARD1  
RAB14 DSTYK  
SEC13 NUP37  
AXIN1 UTP14A  
MAPK14 CAMKK2  
EWSR1 CUEDC2  
TBP GTF2A1  
CYP11A1 FDX1  
VHL KAT2B  
DCD CDC42BPB  
VHL KAT2A  
TBP GTF2A2  
DVL2 MAP3K1  
RARA PNRC1  
LMO4 LDB1

CAST CASP1  
VPS11 VPS18  
HDAC1 TAF1B  
RBMX CIRBP  
RUNX1T1 HDAC1  
FLNC CAMKK2  
DAND5 RELA  
PRKAR1A CHMP4B  
KRT36 ELF3  
RPL35 LYAR  
TMX3 BRE  
C14ORF1 BAIAP2  
SRI ANXA11  
CDC37 TRAF6  
CD55 CD97  
GRB2 PTPN12  
DYNLL1 NDUFA4L2  
SMAD3 MED15  
PHLDA3 NUP205  
PPP2CASTRN4  
COPG2 PHLDA3  
EIF2S2 KIAA1377  
ARF6 TARDBP  
GOSR2 STX5  
CCNE1 COIL  
YWHAQ PI4KB  
CD81 INO80B  
USP49 SHCBP1  
EPOR INPP5D  
AFF2 GRB2  
PRDM1 ATXN1  
NCOR1 SMARCC2  
RBMX PSMF1  
STAT1 SPTAN1  
CASP14OTUB1  
PPP2CBCCNA1  
MTDH CREBBP  
TRIP6 KIAA1683  
TRMT112 N6AMT1  
CASK GLS2

MAPK6 ZNF600  
ABL1 HCN4  
GLRX3 PRKCZ  
UBQLN2 BTRC  
SMAD2 ZNHIT6  
CASK DLG1  
ZNF207 SF3A2  
BCAR3 FUS  
AGL RPS27A  
PTP4A3 SSR1  
XRCC6 PAEP  
CSTF2 BRCA1  
PTN ARL15  
CREB1 GSK3B  
ALDH2 C2ORF18  
HLA-B TUFM  
SNAPIN DTNBP1  
UBE2W TRIM2  
ADAM12 SH3D19  
PTPRS KIAA1377  
YWHAG PRPF38B  
NR3C1 ZBTB16  
PAX6 LHX2  
HTT SETD2  
SERPINB9 PLEKHM1  
ATXN7L2 MDFI  
PHLPP1 SLC9A3R2  
DFFA EWSR1  
KDM5CHDAC2  
MAP2K7 MAP3K1  
SKP1 FBXO7  
CALM2 MAP3K14  
PPP3R1 CABP5  
MDM4 AKT1  
FGFR4 FGF9  
FN1 CTGF  
TRIP13 MEPCE  
CFI CFH  
SNTG1 DTNA  
PHF6 LYAR

BUB3 TRAF6  
SOX10 UTF1  
LAMA1 DAG1  
GEMIN4 EIF2C2  
BRCA2 AURKB  
PTGS2 NUCB1  
CSNK1E PPP1R14A  
TRAPPC3 TRAPPC2L  
F10 SERPINA5  
DNAJB6 PIK3CA  
MCC RRM1  
TERF2 MUS81  
GYS1 GABARAPL1  
RAP2A GABARAPL2  
EFTUD2 PRPF8  
ADCY6 GNAS  
NOS1 DLGAP2  
EPHB2 EFNB2  
UBE2I WNK2  
BTG2 PICK1  
SAP18 MAT2A  
SLC25A4 BAX  
SNRPA GIGYF2  
FOXO3 YWHAB  
ZNHIT1 UBC  
YWHAZ PRKDC  
PPP2R1B STK24  
POLR1A SIRT7  
GAPDH POU2F1  
ACTB NCOA6  
SMURF2 RAB22A  
SREBF2 MKN1  
EPHA3 RUFY1  
ARHGAP27 SH3KBP1  
SYNCRIP INSR  
CALM2 IKBKG  
PPBP PMAIP1  
HMGB1 ZFP36  
MARCH5 FIS1  
TUBGCP3 FBXW11

NFYC TAF12  
MAPK3 MKNK1  
PCNA MBD1  
PAH PCBD1  
EPHB2 VAV2  
FZD7 UBQLN4  
ATXN1 SIX5  
VIM SDCCAG3  
HTR1A S1PR3  
FYN RP1L1  
S100A10 RPS27A  
PLAT GPRIN1  
CDH5 PKP4  
ADRA1D SNTA1  
GABRA1 PPP3CA  
CRB1 EXT2  
ADRA1D SNTB2  
SNW1 CIR1  
ITGB5 MYO10  
MATR3 RELA  
NFKBIA RPS27L  
ARID1B KDM5B  
PROC SERPINB6  
EXOC7 AKTIP  
VHL PITPNB  
HNF1A CTNNB1  
ARPC5L TTLL3  
ANXA2 HLA-B  
PTPRZ1 ADD2  
TRPC1 MDFI  
HNRNPA1 YTHDF2  
ADRB1 DLGAP2  
CBR1 HLA-C  
DHH HHIP  
CALM2 RIT2  
INSR GAB1  
C6 GRB2  
PDPK1 HSP90AA1  
ARAF PIK3R1  
CALM2 CABIN1

RAB2A BLZF1  
ADD1 HSPH1  
PRC1 PLK1  
ASAP2 NCK1  
KRT18 HSPA1B  
USP49 USP44  
UBE2I RWDD3  
ALB F7  
KRT20 EXOC8  
SIN3B IKZF2  
AES SIX1  
ARAF FERMT2  
ATF2 CREB5  
TADA3 PIAS4  
RAB7A RABGGTB  
SMAD2 IFT57  
PRMT2 HNRNPUL1  
ATP5B ATPAF1  
LGALS1 CD7  
TAF1A HIST3H3  
SOCS1 NCK1  
LAMA5 ATF7IP  
NR1H2 PRMT1  
GLUL DYNLL1  
ARRB2 MAPK10  
ESR1 CEBPB  
H2AFJ PARP1  
SMAD6 TOB1  
AK1 TRIM63  
POLR2C INTS12  
EGFR CDH1  
INADL CRB3  
SLC38A1 UNC119  
FLNB PIK3R1  
FN1 COL4A5  
HNRNPK CNNM3  
RBM26 KBTBD7  
EP300 N4BP2  
SMARCE1 DISC1  
SMARCA4 PBRM1



DDR1 FRS2  
CYCS AGTPBP1  
SOS1 GAB1  
CCNB1 TGFBR2  
PRPF6 YWHAB  
AP1G1 PACS1  
CBLB SH3KBP1  
CD82 CD151  
GAK ALK  
BRCA1 ATM  
PRDX5 CCDC90B  
ABL1 DAAM1  
LYN SNCA  
GNAI2 RASD1  
IFNAR1 CRKL  
SIN3B CIITA  
RELA BTK  
EWSR1 PRUNE2  
TNFRSF10A MADD  
GOLGA3 ACBD3  
MED7 TRIM15  
PCNA FTSJ1  
CDKN1C FBXL12  
PDIA6 SUMO4  
SOAT2 FTSJ1  
DNAJC14 LYST  
UQCRC1 SMARCA2  
PDPK1 SGK2  
GTF2E2NUP62  
HPRT1 TNFRSF14  
STAT4 CREBBP  
EFNB2 EPHB1  
CALM2 NFKBIB  
EFNB2 EPHA4  
USP19 NUP160  
EFNB2 EPHB4  
ECSIT TRAF6  
UBE2I RAD51  
UBA1 SREBF2  
YWHAG MARK2

TLX1 PKNOX1  
ZNF24 ZSCAN30  
UBE2I RAD54L2  
SUMO2 SENP2  
CALM2 AKAP9  
NF1 SMAD3  
PCBD1 THOC1  
ARID4B INGX  
EIF3A WNK1  
FGF18 FGFR2  
SATB1 CUX1  
SIN3B MXD1  
TOM1L1 EEA1  
LDHB RAC3  
CALM2 TRADD  
RTKN SMURF1  
DDB1 COPS4  
NUP98 QRICH2  
RPAP3 PFDN2  
HMGB1AR  
NBN MDC1  
HNRNPK SORBS3  
MEF2C USF2  
C1QBP HABP4  
CDK1 LZTS1  
HSPA1B BRSK1  
GRB2 NAALADL2  
CALM2 ASCL2  
FOS USF2  
CDC73 LEO1  
ZNF24 ZNF434  
CENPB TAF1D  
GATAD2B MKNK1  
SIN3B HDAC9  
HNRNPM TSC22D1  
CDK9 KIAA1967  
PAPOLA SIRT2  
COL2A1 LOXL4  
IL33 IL1RL1  
DHX15 PRPF40A

HDAC4 MORC2  
PARK7 STUB1  
NR2F1 NCOA1  
PPIA PPP3R1  
NBR1 GABARAPL1  
HUS1 RAD17  
BLM MCRS1  
ERCC8 DDB1  
CREG1 RBL1  
EPB42 SPTAN1  
ACVR1B INHBC  
ANXA6 TPD52  
DBT SRRM2  
GADD45B ESR1  
DISC1 MYT1L  
COL1A2 COL5A3  
YEATS4 SMARCB1  
PHOX2A ATF6B  
NFIC ZNF167  
MAP3K13 MAPK8IP1  
KDM1ANR2E1  
CFLAR TRAF1  
SIN3B IKZF3  
ARF1P1PLIN2  
PCNA CCNO  
BCR ERCC3  
BLOC1S2 IFT57  
MPDZ KIT  
AKT1 ARHGAP29  
RAB1A FSCN1  
TSC2 RPS6KA1  
ID2 HES1  
NR3C1 CUL2  
MYO1DIKKBKG  
IKBKB CLTC  
DLG4 EXOC4  
BCAR3 SET  
PLK1 STK3  
KIAA1377 DUSP12  
IKBKE ARX

MPDZ F11R  
TRIM27PML  
TBP POU3F2  
USP14 PSMD1  
UBE2K RNF185  
EFNB2 LGALS12  
ISG15 UBA7  
SIN3B IKZF4  
MAPK12 MAPKAPK5  
PLXNA2 UBAP2L  
CDC37 RIPK3  
ATM RAD9A  
UBTF MCRS1  
NDC80 PSMC2  
CD40 TRAF6  
SRPK1 FERMT1  
SYNJ2 FYN  
TGFB1 ITGB6  
HDAC7 HDAC5  
MYO1DTSC22D1  
UQCRC2 SNCA  
MCM5 MDFI  
ATXN1 BATF2  
PLSCR1C10ORF54  
HNRNPF SUMO4  
TUBG1 CEP72  
ETS2 TWIST1  
HIST1H1B MELK  
TCF7 DAZAP2  
CBX1 SUV420H2  
VAV2 VPS24  
TGFB1 RASD2  
DCP2 UPF1  
CYBA VHL  
PPP1R2 GSK3B  
POLR2B GPN1  
DAND5 DCAF6  
CHEK1 TIMELESS  
CDK5 PPP1R1B  
BBOX1 HSPB3

TADA3 EIF3J  
PPP1CCCDKN2A  
TBPL1 RAB35  
APBB1 CPSF6  
HIST1H2BG ELF3  
SOCS6 KIT  
ABL1 BCR  
MYOD1PPARGC1A  
ZBTB25SSX3  
CAMK2B CAMK2N2  
RNF8 BRCA1  
POLD1 KIAA1377  
LCK MAPK3  
RFXANK RFX5  
NRBF2 PA2G4  
CUL4A DDA1  
IGF2R PACS1  
UBXN1 TAF9  
PRKCA HSPB8  
MYCBP2 RAE1  
SLITRK3 KDM5B  
CHEK1 RPS27A  
BCAR1 ACTB  
CDC42 TMX4  
RPA3 CHD1L  
GH1 DSPP  
FRA10AC1 GDPD2  
EWSR1 MDFI  
TERF2 RAD50  
JAK3 IKBKG  
PSEN1 KCNIP3  
PIP WBP5  
ACTL6A SMARCA2  
ACTL6A SMARCA4  
NDUFB1 NDUFA5  
PTPN12 TEX10  
GADD45G C7ORF64  
GRAP2 USP8  
UBE2N SH3RF2  
NVL CRMP1

UBE2N RNF128  
KRT10 TJP1  
DAND5 CABP1  
TGFBR1 RAN  
SYTL1 NRXN1  
PPP2CASGOL1  
SPR CAMK2G  
NR3C1 HOXB1  
CD74 CTSL1  
DNAJA1 ARL4D  
EDN3 EDNRB  
SAFB TAF15  
MEPCE SRP68  
PIP USP25  
ID3 HES1  
NEDD9 DOCK3  
F8 F2  
BRCA1 CTBP1  
F8 F9  
RBF2 CHAF1A  
F8 F10  
CAV3 DAG1  
DAZAP2 EXD3  
SMARCA4 PABPN1  
MAGOH PINX1  
HOXA1 KDM5B  
POMC PAM  
UBE2I ZNF451  
NADK GRB2  
PPP2R1B PPP2R3B  
FMR1 NUFIP2  
FGA KLK6  
HGS MET  
ACTN4 MEF2A  
DRD2 SSTR5  
EWSR1 BARD1  
SOCS3 IL6ST  
HGS RPS27A  
ABL1 WNK2  
ATXN1 CLEC4F

ESR1 TSC2  
LCK VAV1  
CD40 USP15  
CBX3 NIPBL  
RB1CC1 DBNL  
HRAS BCL2  
CSE1L RAN  
CHGB SLC25A6  
SERPINB5 PRSS21  
FGFR3 KIAA1377  
ESRRA NR0B2  
CTNNB1 GNA13  
SPTBN1 PYGO1  
CUL1 COPS5  
IRF9 ARID3B  
MAP4K4 TRIP11  
LRP6 MESDC2  
CDC7 DBF4B  
SERPINA1 CELA1  
PRSS23 PPIA  
IKZF1 RBBP8  
SUMO2 PTPRS  
CCDC91 TESC  
SUMO2 MTA1  
AP2A1 GHR  
BIRC3 MAP3K14  
YLPM1 PRMT1  
HR TBL1X  
SMAD4 BTRC  
MAP3K8 CLTC  
VENTX IRF9  
PPP6C PPP4C  
DEGS1 FOXP4  
SGSM2 MPP1  
INSR CAV3  
NR3C1 IDE  
GOSR1 NAPA  
C3 VHL  
CCDC130 TRAF2  
SNX33 SNX9

TRIM23 UBE2U  
SLC12A3 WNK4  
MAPK8 JKAMP  
CIAO1 IPO4  
POLR2F MED9  
UBE2D2 XIAP  
HSF2 NCAPG  
NFKB1 KAT5  
SPRY2 SH3KBP1  
SEPT6 SEPT2  
APOB SEC61B  
IQGAP2 MAP3K3  
FES BCAR1  
REST SMARCE1  
XPC SMARCB1  
NSF VAPA  
RPS6KB1 RPS6  
NR3C1 TDG  
HLA-B SLC25A1  
SYT14 MKNK1  
BCL2L11 YWHAB  
DDX58 CYLD  
PSEN2 EXOC6  
SMARCA4 NR1H2  
PPP2R5B SGOL1  
PGK1 GAPDH  
TGFB2 TGFBRAP1  
DAP3 IKBKG  
MMP2 LAMC2  
IKBKB CUEDC2  
L3MBTL2 PHF10  
NGFRAP1 TRAF4  
EWSR1 WDR37  
CCL5 SDC1  
IL7 IL2RG  
TUBGCP4 MAD1L1  
PBRM1 SMARCE1  
CRMP1 DPYSL2  
MAPK10 PLIN2  
GABARAPL1 RABGAP1



CETN3 IKBKG  
NBN CDK9  
TNFRSF1B DNAJA1  
CRK ID4  
DTNB HMG20A  
NR3C1 HDAC1  
SNRNP70 RNF11  
PDCD10 TRAF3IP3  
PIN4 EZH2  
HCK AGK  
TLR2 MAPK8IP3  
FOXO3 SMAD2  
FGFR3 GPSM3  
PRSS3 TFPI  
SUMO1 XPC  
FCER1G GP6  
PPP1R12A FOS  
ACTL6A RELB  
UNC119 ZFP64  
MAP3K8 NFKB2  
ARID4B SAP130  
IKBKB NFKB2  
TRAF3 MAP3K14  
TARS ARF6  
SSX3 ZBTB3  
ACTB RAB8B  
SYNCRIP SF3A2  
KHDRBS3 RBM7  
VPS11 UVRAG  
HDAC4 PPP2CA  
IL3RA CISH  
APBB1 ATXN1  
ITGAM CLEC4M  
GRB2 ST5  
ATF3 FGFR3  
TCERG1 CHAF1A  
PSMA7 PLK1  
IKZF1 HDAC7  
HLA-B IARS2  
MDM2 HIPK2

NFKBIE          PPP6R3  
MDM2   GNAS  
FASN   NDRG1  
CTPS   YWHAZ  
RB1     BRCA1  
TRIM27DPEP2  
AR     FLNA  
BAK1   MFN1  
KCNQ2   PRKCA  
TRPC3   TRPC6  
RUNX1   ELF2  
EPHB2   EFNA5  
PML     TRIM69  
HMOX2KCNMA1  
DDX3X   TBK1  
DISC1   TNIK  
MYC     NUP205  
CAV2     PLD2  
RNASEH2A   BCL6  
LCK     CYP4F8  
YWHAQ          SLC8A3  
CYP27B1          RUNX1  
NFKBIB          PDCD2  
TP53     USP7  
F7        USP49  
MCM3     PNKP  
KDM4AHDAC1  
PSEN1   EPB41L3  
IGFBP5   BAG6  
RALA     EXOC6B  
TFPT     UCHL5  
CPSF6     ITCH  
CHRM3     ARF6  
BCL3     EP300  
PABPN1          DNAJB4  
QTRT1     NDUFA4L2  
CDC40     DHX38  
STOM     CUL2  
ELF3     SPG7  
RBFOX2          PSMF1

MLH1 EXO1  
CD5 CD72  
PPARA CHD9  
MAPK3 TSC2  
NRP1 GIPC1  
RPL28 CDC42  
CHEK1 MDM4  
GATA1 SPI1  
ITGB1 LGALS3BP  
ABL1 MAP4K5  
ABL1 TRAF6  
DPPA2 SETD5  
DCP2 DCP1A  
GLUL HLA-B  
VOPP1 C8ORF33  
MAPT BAG1  
TADA2A FAM107A  
RHOA AGER  
HNRNPA1 HSPA2  
RAB11FIP2 RAB11FIP5  
HLA-B PSMB3  
UBE2L6 PJA2  
IARS NFKBIB  
TCEB1 PPRC1  
CAPNS1 ATP5J2  
SHBG SEMA3F  
MRAS RASSF5  
SRGAP2 DISC1  
IMMT NIPSNAP3A  
ACSL3 GTF2F2  
TRDMT1 STX1A  
APC2 CTNNB1  
TRIM23UBE2I  
ARPC1A PTPLAD1  
BMPR2 TSR1  
PIH1D1 RUVBL1  
RPS27ABAX  
PRKCZ AKT3  
GRB2 PTK2  
INSR SNX1

BECN1 EXOC8  
FOS VPS24  
APP EPB41  
RB1 SMARCA4  
NOP56 AIRE  
CREB3L2 PTP4A1  
HLA-B SOAT2  
WDR1 SKIV2L  
SMARCA5 CREB1  
INSR IRS1  
RPS27AMCL1  
ZBTB7A BCOR  
STX4 SYT4  
KRT9 SH3GL3  
SMAD4 SMAD1  
RALYL THAP1  
SMAD4 SMAD2  
CSK PTPN12  
HSPA9 SUMO4  
IKBKE RDX  
DCAF7 DYRK1A  
CTNNB1 CDK6  
PCNT BRAF  
TXNL1 USP14  
MEPCE SAP30BP  
UFD1L USP13  
LYN CSF3R  
ALDH5A1 ABAT  
ATF7IP RRBP1  
FYN GAB3  
NCK2 DOK1  
LTBR TRAF3  
IGSF21 EPB41L3  
LCK BCAR1  
ABL1 TLN2  
UBE4B XPC  
PIH1D1 RUVBL2  
DHX9 HINFP  
NUMB LNX1  
TBXA2R GRK6

ABL1 PIK3R1  
DDX54 OTUB1  
ZFYVE9 BAG6  
OTUB1 CPNE7  
FYN COBRA1  
VIM CHD3  
PPP1CASF3A2  
UBE2D2 RNF7  
DVL3 VANGL1  
CBX5 DNMT3B  
ROCK2 STAU1  
ARF6 EIF4G1  
TGOLN2 PIK3R1  
CDKN2C CDK6  
FGFR3 FGF9  
HLA-B HINT1  
NTHL1 RNMTL1  
TLE1 BTBD2  
PHYHIP SMARCC2  
MPDZ DRD3  
TFAP2A SYT1  
TIFA AP1M1  
SEC16AMAP3K3  
MCM3 MCM4  
TP73 NPRL3  
MCM3 MCM7  
TRIM23POM121  
MCM3 MCM5  
PPP2R1A PARK7  
CCND1 CDKN1B  
FANCA SRC  
EP300 LEF1  
SRC CRK  
DDB1 VAMP3  
PRKACA CREM  
STAT6 ANKZF1  
MAX SNIP1  
SPN DAXX  
ENY2 TRRAP  
PCBD1 BCAN

SLC38A1 DGKZ  
THBS1 JAG1  
ACTA1 TRIM63  
CLU WNK1  
BET1 USO1  
PSAP SMAD2  
PHPT1 DNMT3L  
DDX17 SORBS3  
PLG S100A10  
CAPN1 ARF6  
DUSP11QARS  
SMARCA4 SMAD3  
MET RANBP10  
ULK1 USP10  
HRAS PIK3CG  
PIK3R1 TPX2  
TUBA3C NFKB2  
CFLAR FADD  
MAP4 RXRG  
TGFB2 DAB2  
BRCA1 ORC2  
TFE3 LRPPRC  
FLNA MAP3K1  
BCAP31 PTPLB  
BRD1 TAL1  
IKBKAP NDUFB9  
CCNB1 RUNX2  
MYC GNL3  
HDAC4 NCOR2  
GKN1 MDM2  
GSPT1 VHL  
RB1 TRIM27  
TUBGCP4 CHIC2  
MAP2K3 MAP3K5  
HDAC1 SAP130  
PPM1A GRM3  
NR1H2 ZXDC  
ARPC2 PDCD7  
RXRA PPARGC1A  
RAB1A RUSC2

GYS1 MAP1LC3C  
TCERG1 NUDT21  
HSPA4 SEC61B  
MDM2 ZNF326  
PLD2 PRKCA  
SHBG GRB2  
CTTN SIRT1  
TP73 DDX23  
ARHGEF7 GIT1  
NTRK1 NGFR  
PML SAP130  
RAB3B RIMS1  
TLE3 AES  
DLEU1 KAT5  
DCTN3 PBX2  
HSPB1 USP38  
PTK2 TNS3  
HRAS ARAF  
ANKRA2 HDAC9  
SRC PPARD  
KCNN4 PRKAG1  
RPA1 ATR  
GPKOW NINL  
SORBS2 DLGAP2  
IKBKE NCDN  
DDX5 TFCEP2  
TSC2 RHEB  
CHL1 E2F1  
STAT1 CAMK2G  
PTP4A3 NCDN  
PTP4A3 ATXN10  
ESR1 NCOA7  
STAT1 CAMK2D  
CD81 RPS27A  
CDC6 ORC3  
STRN STRN3  
GH1 SOAT1  
ESR1 JUND  
AP2B1 TERF2IP  
CDKN2B CDK4

IKZF2 HDAC5  
PCNA PRKDC  
FYN ABI1  
MCC DDOST  
CBX6 HOXC9  
PDLIM4 PTPN13  
EWSR1 SUV39H2  
SULT1E1 COPS6  
NFKBIE ARHGEF2  
UBE2D1 RFWD3  
LTBR TRAF1  
CDKN1C CUL1  
RBBP7 ATG10  
TNFSF14 TRAF2  
NPPA UBQLN4  
UBA1 RPS27A  
SRC SLC9A2  
RECQL5 STAMBP  
CD40 CAV1  
CDC20 KRT31  
NR3C1 TTC3  
CEP135 CENPJ  
C7ORF64 BTBD2  
MCC AIMP1  
PITX1 DVL3  
UNC13A EPB41L3  
PHYH MAGEA11  
FLNA G3BP1  
PSG1 UTP14A  
OXSR1 SLC12A1  
TGM3 PRKAB1  
PKP1 WIP1  
TUBB RELB  
WISP1 UGGT1  
SNRNP70 SMAD1  
SNRNP70 SMAD2  
CCNK CDK9  
HDAC1 EID2  
CD63 CD9  
NR4A1 AKT1



HNRNPC KPNA3  
IKBKAP MRPL42  
FYN DOCK3  
ITGAL ICAM5  
ATXN7 TP53BP2  
SUV39H2 EWSR1  
FLNA PSEN2  
GNAI2 CAV1  
VHL RIT1  
MAP2K1 BIRC6  
PRKCZ MLL3  
PCBD1 WDYHV1  
PSMD1 PSMD13  
SYNCRIP PRKAB1  
MEIR5 DTNBP1  
PLK4 TEC  
GRIA3 PICK1  
HSPA1B IKBKG  
VIM PLA2G4A  
MITF SPI1  
POLA1 HELB  
HIST1H3J KAT2B  
AGTR1 ARRB2  
HIST1H3J KAT2A  
RCC2 TNIK  
RBBP7 INGX  
PTPN2 FKBP4  
CAP2 ACTG1  
ATXN1 CLASRP  
HIVEP1 FBXW11  
PSMD11 EEF1A1  
DAND5 CEBPB  
LMNA ZNF239  
PINX1 MYCBP  
UBE2D2 RNF14  
ABI3BP ABI3  
MYO1DPLDA3  
PGR RBM23  
GATA1 ZFPM1  
FIBP AP4B1

ECSIT EXOSC1  
STK16 HNF4A  
SPRY2 PTPN11  
BIRC5 PPP1CC  
MUC2 MAP4K5  
SQSTM1 NIPSNAP1  
JUP FER  
FN1 LGALS3BP  
PRKCI PARD6A  
UBE2D2 TRIM39  
PML PCBD2  
RXRA NR4A1  
PFDN5 BRMS1  
YWHAZ KIAA1377  
FOS LAS1L  
SH3KBP1 SH3GLB2  
TRIM29GCC1  
THRB MECR  
HDLBP FAM46A  
MEF2C SMAD2  
HADHBTNNI3K  
A2M PRAM1  
DDX5 CHD3  
POU2F1BARD1  
PCNA CSTF1  
TWISTNB TAF1D  
RAB3GAP2 GSTK1  
CFLAR TRAF3  
FAM107A KRT15  
INHA FST  
SURF6 SMAD2  
RASSF5RASSF1  
HNRNPM NFKBIB  
YWHAZ LARS  
MCF2L RHOG  
EDF1 RXRA  
APBB1 WIPF1  
CLU TNIK  
BLMH KBTBD7  
SMARCA1 HIST1H3J

EPB41 U2AF2  
TPST2 CCR8  
PLOD3 EHMT2  
NOTCH2 MYOC  
EWSR1 HIST1H3I  
TP73 SASS6  
BRD4 MED12  
GPD2 YWHAG  
ACTG1 PLEC  
SHFM1 PCID2  
YWHAZ CGN  
SCN4B SCN2A  
SFN ARHGEF17  
EZR L1CAM  
NTRK2 SH2B1  
PTPRZ1 WAS  
PRRC2B EHMT2  
ATF3 NUF2  
SOX5 SMAD5  
MED21 MED1  
LHB LHCGR  
CPSF1 CDC73  
CA2 SLC9A1  
PIK3R1 ASAP1  
BRCA1 SMAD4  
ETV6 HDAC9  
ACP1 EPHA2  
SCAMP1 SLC9A7  
ENSA MCM3  
PAEP COPS6  
MYOD1 CSRP3  
GRIN2D IL16  
EWSR1 RALYL  
NPM1 STAT3  
GYS1 GSK3B  
ALPL TRAF3  
ARPC2 SNRNP35  
CDC27 SPATC1  
MED6 CDK8  
BIN1 SH3GL2

PSEN2 CASP7  
RPS6KB1 RBX1  
PSEN2 CASP6  
NR4A1 SMARCC1  
ABI2 WASF2  
CHN1 TGFBR1  
USP1 CALML5  
TRIAP1 HSPA1B  
BUB1B HDAC1  
OAT HLA-B  
TRPV4 PACSIN3  
MAPT YWHAQ  
RPS23 GRB2  
ATM RBBP8  
PLXNB2 PTN  
CDC42 MYO9A  
MED21 TARBP2  
PRKDC PTS  
ESR1 DUT  
HDAC2 UHRF1  
CSDE1 WNK1  
NEFM MDM2  
GPS1 CUL5  
PARK2 PDCD2  
SNCA SNCAIP  
CUL4A DCAF5  
BCAP31 PKD2  
FOXO3 MYC  
HSPA9 RELA  
HMG20A RBM7  
H3F3B CHD1L  
ACP1 ZAP70  
POU2F1 IRF9  
RNPS1 C20ORF11  
NR3C1 POU2F1  
C19ORF57 IKBKG  
ID2 NEDD9  
NR112 RXRB  
TNNI3 SMURF2  
HDAC1 BCL11A

TRIM24TAF1C  
HDAC1 INGX  
EZR VHL  
ACP1 EPHB2  
C21ORF63 RBBP6  
PFN2 MUC7  
TCP11 IKBKG  
EHMT2 PRDM5  
EPRS NFKB2  
XPO1 PHB  
CXCL13 CXCR5  
SMARCA1 BAZ1B  
ATM CDC6  
PHLDA3 SRPRB  
PCBD1 SCMHI  
FOS ESR1  
WBP4 FUS  
MAP3K7 IARS  
PAX3 TRIM28  
GNB2 GNG13  
UTRN PPP3CA  
CRMP1 MOBKL3  
UBE2I RAD54B  
PLK1 PAK1  
GIGYF2SF3B2  
PPM1G SNRPA  
SOCS2 IGF1R  
TXNL4A USP39  
ERBB2 HSPA4  
ABL2 CRK  
USP39 PA2G4  
TXN DNAJA1  
ADRBK1 PEBP1  
GTF2E1GTF2A2  
VAV1 SYK  
TUBB BRCA1  
CFH ITGAM  
VAV1 ZAP70  
OPRD1 OPRK1  
PHLDA3 TNPO3

CXCR2 MYO5B  
PRKACA PDE4B  
E2F1 TP53BP1  
GTF2E1 GTF2A1  
OAT DMWD  
MEIS2 PBX1  
CANX OPRD1  
SIRT2 PHB2  
PRKCG CLIP3  
TRIM24 TAF11  
TRIM24 TAF7  
SUMO1 TOPORS  
SEPT4 TNIK  
ATG2A WDR45  
BCL6 SIN3A  
CALCOCO2 RHPN1  
KPNA3 ARRB2  
ATG7 ATG3  
CCT5 RFWD2  
EIF4A2 DDX24  
AKTIP EXOC7  
PTPRS KAT5  
HEXA GM2A  
HNRNPH1 CCT5  
CST3 CTSD  
RAB1A MICALL1  
RASGRF2 PANK2  
AKT1 CDKN1A  
POLR1C CIAO1  
YWHAZ CCT2  
ACTB LASP1  
MYH2 USP15  
PIAS1 BRCA1  
PPOX IMMT  
FAIM3 HOXD9  
MEF2C SIRT1  
BCL2 SPNS1  
NAPA IKBKE  
PIAS4 ZMIZ2  
PPP1CCAKAP11

RANBP2 PLEC  
CASP3 YWHAE  
RAD51 MDC1  
TXNDC9 IKBKAP  
MAP3K7 HSPA9  
CCNB1 CCNB1IP1  
YWHAG COLEC11  
GORASP1 TMED3  
ADAM12 IGFBP5  
UTRN HIST1H4I  
HNRNPR MEPCE  
CBX3 CHD1L  
ESR1 PRKACA  
CSNK1A1 CREM  
ANXA2 MCC  
RNF2 MYST1  
SNAI1 BTRC  
TMCC2 UBA1  
UIMC1 BARD1  
CASP3 RAD51  
ZNF250 BEGAIN  
AKAP3 PRKAR2A  
HBP1 SMAD1  
SUMO2 TRIM28  
ACTR1B ACTA1  
RNPS1 FGD3  
FOS TLN2  
ANPEP SFN  
ABL1 CD2AP  
WWP2 SF1  
TRAF2 TRAF1  
PCNA POLL  
UBE2N RNF165  
NFKB1 JAKMIP1  
TFCP2 SIN3A  
EPB41 GDI1  
TPM3 S100A2  
PRPF40A GAPDH  
IKBKB KIAA1967  
PPP2R5A SGOL2

UBE2L3 ITCH  
GRIN2D MAP2  
XRCC6 BIN1  
SLC38A1 SAT2  
CTNND1 MTNR1B  
CHD3 BARD1  
SDCBP SRC  
HTT PIAS4  
IKBKE SAE1  
FOXO3 AKT1  
CAPN1 F2R  
SGSM2 AFP  
MRPL10 USP22  
CHD3 FAM134A  
HSF1 STUB1  
SNRNP70 ARSF  
PRPF4 NAA38  
SSTR3 GNAI1  
HSPB1 HSPB8  
PHB SUMO4  
ARL1 CDK5RAP3  
YWHAG CAMKK1  
TP73 CHD3  
CDK9 PCBP2  
PTK2 ARID2  
SUMO1 SALL1  
GRK6 GIT1  
CUL4A BRWD1  
CDK1 RAP1GAP  
USP49 PPP6R1  
CHD3 SERBP1  
USP19 PDHA1  
ATP2B4DLG2  
H3F3B CARM1  
PCBD1 SMARCD1  
SPTA1 EZR  
RPS20 NEDD8  
IRF9 GFI1B  
SUDS3 BRMS1  
HDAC2 SPEN



PDIA3 RAC1  
RAB8A SYTL4  
XPO1 NF2  
RDX PHLPP2  
SSBP1 LDB1  
HDAC2 SIN3A  
CDC37 IKBKG  
LTA4H DDA1  
MAPK1 STAT5A  
MSN ICAM3  
MYO1DRIPK3  
RBL1 TFD2  
UQCRC1 RUVBL2  
ARVCF CDH1  
SRC RPS6KB2  
LSM3 LSM4  
SPI1 CEBPD  
CPSF3 WWOX  
UBE2W CHFR  
PTPLAD1 TP53TG1  
INO80 RUVBL2  
NR3C1 SYT1  
HDAC3 NFATC1  
RB1 PA2G4  
UBE2I GMEB1  
RBL1 TFD1  
DHCR7 TNIK  
NFKBIA ARRB2  
PPIA YWHAZ  
SNRNP70 BTRC  
PLSCR1SLC35A2  
SREBF2UBQLN1  
CDKN2A PPP1R9B  
CD4 CXCL12  
XRCC5 KAT2A  
SPTBN1 RIPK3  
INO80 RUVBL1  
SNX4 SNX6  
UBE2I FMR1  
CSTF1 CSTF3

LSM3 LSM5  
PRMT5 HIST1H3J  
HMGB1 RFX1  
EPHA2 SHC1  
LTF PAK1  
TRMT112 PRKAB1  
SRC CAV1  
RAD21 CTCF  
GAS7 APBB1IP  
SSSCA1MYO15B  
SFN NEDD4L  
POLR2E TAF15  
CCDC136 CDC5L  
UBE2WRNF125  
CLTCL1 SNX5  
CASK FCHSD2  
USP12 PAIP1  
GH1 HIST1H2BG  
PDLIM1 RLIM  
TLK2 ASF1B  
PTN ITSN2  
LANCL1 STOM  
PRSS23 TCF12  
TRPC1 TRPC4  
AP3B1 BUB1B  
RALA RALGPS1  
RCC2 FTSJ1  
ACTC1 AFAP1  
AP2A2 CLTC  
ASF1B TLK1  
MAP3K10 PRKCZ  
LRRC41 TCEB1  
EIF2S1 PRKCD  
GBP2 FXR1  
NPM1 NUP98  
CTBP2 TGIF1  
CDC42 ANO1  
GZMA APEX1  
AKAP17A MDFI  
CASP8 TRADD

GEM CACNB1  
HTR2A GNAI1  
FUS SRRM1  
ABL1 GPR45  
DAZAP2 RPS27A  
UBC COPS5  
PAX6 RAX  
ACTL6A EWSR1  
MAOA NDRG1  
UBE2N MKRN3  
HDAC1 MORF4L2  
COL2A1 FN1  
LTA LTBR  
LRRC41 TCEB2  
GOLGA3 TAF10  
EWSR1 RASL11B  
UBE2I DNMT3A  
TGFB1 LTBP1  
ABL1 SNX8  
CHD6 TOLLIP  
SDCBP RAB5A  
PTK2 ROCK1  
ABL1 NFS1  
WARS EEF1A1  
DYNC111 STAU1  
LYL1 NFKB1  
COL2A1 C1QA  
FASLG GRAP  
YWHAQ EIF4A3  
BCL2L1 AKT1  
TCERG1 HSPA1B  
VCP1P1 NSFL1C  
TUBA4A MARK4  
BDKRB2 GRK4  
TADA3 ANKRD12  
FGFR3 FGF8  
VHL RCC2  
ZNF10 TRIM28  
IMMT TSG101  
IKBKB AKT1

PLD2 ARF1P1  
GABRR2 MAP1B  
CGN F11R  
ADAM12 FST  
POP4 POP5  
SHC1 COPS5  
YWHAH KLC3  
VIPR1 GNAQ  
XRCC5 APEX1  
HLA-C UGGT1  
JUND NFE2L2  
ASF1B ASF1A  
TAF2 TAF9  
ETV6 CRKL  
ARHGDI1 EWSR1  
NAIP NLRC4  
GNAZ ADORA1  
ADRA1A ABR  
TEK TNIP2  
BDNF CADPS2  
VCP UFD1L  
PRKAR2B AKAP11  
USF1 PRKDC  
PRKCA DNM1  
BMP2 DIP2A  
MAN2A2 RANBP2  
FASLG PIN1  
RFC2 PMS1  
POLR3D MSX2  
HSPB1 AKT1  
PPM1F PAK1  
RAD1 HUS1B  
DCAF6 TRIM63  
CDC42 PARD3  
STXBP1 APBA2  
PMAIP1BCL2A1  
CSNK2A1 BRF1  
EPB41 MAPRE1  
CSNK2A1 DVL3  
NPM1 HMGA2

EGFR SH3KBP1  
LRP8 SS18  
MLL PPIE  
RAB4A GDI2  
HLA-B MRPL40  
CD2BP2 WBP11  
HSPA1B CUL4A  
MAPK3 PLCB1  
BUB1B AP1B1  
PIK3R1 DOK1  
GATA4 MDC1  
ACTB NSMAF  
SKP1 FBXO16  
SLC2A4UBE2I  
VAV2 ABI1  
PPP2CAPDCD10  
RIMS1 RAB26  
TERF1 RPS27A  
UBE2N TRIM32  
TP53 INPP5E  
FABP1 PPARA  
EED HDAC2  
CNOT4 UBE2D3  
EIF1B EEF1D  
TUBA4A E2F1  
TXNRD1 PPP1R16A  
CSNK1E PER3  
RAB3D RPH3A  
HSP90AA1 SMYD2  
MPP1 STUB1  
HSPE1 TLE1  
TJP1 TUBB  
SAFB SRPK1  
PPP4C DYNC1H1  
EPB41 TSN  
IGF1 IGF1R  
PLXNA2 FNBP4  
MYC SORBS1  
RBFOX2 MED7  
CBFB SPARCL1

ETS1 PCNX  
SNRPF MEPCE  
NFKB1 CAD  
HTT HAP1  
TBPL1 IRAK4  
CNOT4 UBE2N  
ERG ETV1  
LRRC14 COPS5  
PCBD1 PGAM5  
HUNK PPP2CA  
HNRNPU GPN1  
MDM4 EP300  
ZNF205 UBQLN4  
CSPG4 LGALS12  
ARF6 SRPRB  
ZEB1 KAT5  
VHL ACLY  
C1R GRB2  
VHL ZNF512B  
GIPC1 ADRB1  
RIPK1 CCDC50  
PHF2 XRCC5  
TP53 TOPORS  
RAB3D MAST1  
HDAC3 ZBTB7A  
TNFAIP3 RARRES3  
POLR2I MED29  
APC AP2B1  
PPP2R2A TCEAL1  
PHACTR3 LXN  
CSNK2A2 GTF2A1  
FANCA MKNK1  
EPB41 FKBP2  
DAXX MAP3K5  
CDC27 MDC1  
TGFB1 SAT2  
CDKN2C TLE1  
RDBP WHSC2  
PMVK CENPH  
MT-ND4 STAT1

TP53 NR4A1  
TCF4 ID1  
SFN ARHGAP32  
RAPGEF3 RAPIA  
SNAPIN VOPPI  
RB1 SKP2  
ATP1B2NGB  
BRD2 E2F1  
F12 GP1BA  
TP53 SFN  
KHK ILK  
CBFA2T3 HDAC1  
NRAS EEF1A1  
WNK1 SYNPO2  
RECQL5 TOP3B  
SDC3 SDC4  
ACSM3 EHMT2  
FBLN1 CTGF  
TAGLN PRKCD  
FCER2 ITGAX  
GEMIN4 DDX20  
ZBTB16EP300  
TRIM37PBK  
HDAC1 SETDB1  
C3 MASP1  
PTPRC WAS  
PCBP1 PCBP2  
PTP4A2PTP4A1  
ETS1 RPS6KC1  
RAB6A BICD2  
CLDN5 MPDZ  
MYF5 MDFI  
BCL10 IKBKG  
PSMD11 HAPI  
ABL1 GRB2  
CCNT1 BRD4  
TPR NUP107  
GPR183MTA1  
HGS MIF4GD  
ECSIT MAST1

YWHAZ GAPVD1  
SUMO2 ZMAT3  
MLL2 SRRM1  
FN1 SKIL  
PTK2B ASAP1  
FLT3 IKBKG  
PRPF40A SNRNP70  
ESR1 BCAR1  
ESR1 DAP3  
LRP1 GIPC1  
PTPN9 GAB1  
DAPK3 GRB14  
FBXO2 STUB1  
IL4R IL2RG  
TNF RIPK1  
TCP10 PARD6B  
PRMT5 WDR77  
USP54 CHMP2B  
FYN CBLB  
PSMD4 PSMC5  
PTEN DLG1  
ATF6 YY1  
PDZD2 CST3  
KRT15 ABI2  
CD79A CD79B  
RB1 CTBP1  
STX1A STXBP5  
CD82 PTGFRN  
TG CTSL1  
NSF CSNK1G3  
SOD1 KARS  
MBP MAPK11  
SRSF4 DYRK1A  
ZNF124 MDFI  
CDC25C RPS27A  
UBE2I C18ORF25  
RGMA PPP1R16A  
CHD1 SRSF3  
PPARG EP300  
HDAC1 CDK5R1



CDC25C        BRSK1  
EWSR1 C19ORF50  
MLL    E2F4  
CFD    HDHD2  
HDAC3 NRIP1  
H2AFJ TOP1  
EDNRA ARRB2  
ATG14 NRBF2  
RPS6KA5        ETV1  
UBE2I PIAS3  
IGJ    CD79A  
ABI2    ADAM22  
TFE3    SET  
CDH1    CDC27  
COIL    GCC1  
DKC1    WDR48  
CSF1R SHC1  
NCL    PAX8  
GCH1    RPH3A  
VAMP2 VAPA  
POLR2B        POLR2L  
UBTF    SERPINH1  
NUP62 G3BP1  
KIF5B IKBKE  
GATA1 ZZZ3  
KEAP1 RBM45  
TNNT1 PSMC5  
HDAC4 MAP1S  
CLPX    FBXW11  
DEAF1 ASCC2  
CSNK1A1        PPP2R5A  
HMGB1DNMT1  
GSK3B SMAD3  
XRCC1 POLI  
PIK3R1 MYRIP  
MORF4L2        HDAC9  
EED    EZH1  
THAP11        THAP7  
FLI1    EWSR1  
CCNDBP1        IMP3

NCAPD2 NCAPG  
PARK2 DLG4  
CBX1 CHD1L  
NOTCH1 PIK3CG  
CCNA2 BRCA2  
USP14 FANCC  
TNFAIP3 FBXO3  
IRF2BP1 JDP2  
AKT1 ARFIP2  
BACE1 LRP1  
SERPINA3 HOXB1  
MEPCE LSM7  
SEC62 SEC63  
DNAJA2 HSPA1B  
HNF4A SIRT1  
LYN CSNK2B  
CDC42 IQGAP2  
GMNN SCMHI  
GFAP TUBGCP4  
STAG2 STAG1  
GALNT12 MUC7  
CDH2 PIK3R1  
CCND2 SERTAD1  
KRTAP4-12 ZNF426  
NOTCH1 NOV  
TUBB4 RIPK3  
TBP POLR3C  
CDK1 ERCC2  
ZNF263 ZSCAN1  
UBE2C RNF216  
FLNB GRB2  
TOM1L1 GSN  
ABL1 DNM2  
LYN PRKCQ  
COL4A2 FAM46A  
RIMBP2 USP3  
PPP2CATBCD  
UBC MARCH5  
GLRX3 TNIK  
TCERG1 HNRNPH1

MAPK14 C14ORF43  
H3F3B IPO4  
DST PAK2  
S100A12 CACYBP  
CREM FHL5  
SPARC HSPG2  
GYPC MPP1  
F2 SPP1  
U2AF2 SF1  
ATAT1 SETDB2  
YWHAQ RASGRP3  
ECSIT SMURF1  
TP53 WDR5  
PRKAR1A GABARAPL1  
ESR1 SRC  
FYN DOK1  
FYN CDK1  
NLRC4 PYCARD  
SYT6 NRXN1  
MED30 MED10  
KIAA1377 CRCT1  
TFCP2L1 UBP1  
F2 SERPINB6  
MYSM1KAT2B  
TBCA MDM2  
PIP5KL1 PIP5K1A  
TP53 YWHAG  
RAC1 CACHD1  
MLLT4 RIN1  
CDKN1A TSG101  
SEPT9 SRRM2  
RANBP2 USF2  
TYK2 CRKL  
S100B VAV1  
SH3BP2CD244  
RRM1 FTSJ1  
NAA10 EHMT2  
DAND5 HMGA1  
RHOA ARHGEF12  
ACTA2 EP300

CLTB CLTC  
RGL2 UNC119  
OSM COL4A6  
PARK2 CCNA1  
MRPS24 DDX56  
RHOB MAP1A  
HSPA5 PAWR  
F11 SERPINA5  
HLTF RPAP1  
ESR1 XRCC6  
YWHAZ SLAIN2  
PRSS23 TCF12  
EIF3H SRRM1  
TAF10 TAF13  
TAF10 TAF11  
CDK1 PTPN1  
TAF10 TAF5  
PJA1 RIBC2  
KCNAB2 SLC39A2  
NLGN2 NRXN3  
WDR6 G2E3  
TP73 EIF2C1  
RAC1 ARHGEF25  
MED7 MED26  
TAF10 TAF7  
SMAD1 UBE2Z  
FYN CHAF1A  
CHGB SMAD2  
ABL1 ROBO1  
SNAPIN ST7  
APAF1 FAS  
RAB6A INPP5F  
TUBB MAPT  
RXRB NR2E3  
INO80B INO80  
UBC DDIT4  
HLA-B GMPS  
CD19 VAV2  
PFKL MAP3K3  
AIFM1 SETDB1

PRKCG PDLIM5  
PTPRG WAS  
RPS6KB1 RPS27A  
TSC22D1 USP9X  
MEIS1 CREB1  
SOCS3 RASA1  
PKM2 RANBP2  
VAPB STX2  
ELAVL4 ELAVL2  
LYZ USP25  
PLD2 GM2A  
ADRA2A ADRBK1  
SEC61BSPC25  
RADIL MED19  
DAND5 CDK2  
RAPH1 DNMBP  
DVL1 SMAD4  
APBB1 DHX15  
SHC1 INPP5D  
MUC2 PLEKHM1  
INO80CINO80  
WWP2 RNF11  
EPB41 PSMC4  
KPNA5 RAC1  
PLCG1 AKT1  
RAB27A RIMS2  
NUMB PRKCD  
UIMC1 CPNE1  
PAX7 HIRA  
SNAP23STX12  
VCP UBXN2B  
ABL1 NCOA3  
TGFB1 FKBP1A  
HSPB1 DAXX  
PITPNB IKBKE  
SERPINC1 KLK6  
IRF2 IRF2BP2  
PIAS1 ELK3  
PARK2 CCNE1  
CDH1 ARHGAP32

HGS HAP1  
DDX3X SUMO2  
OPRD1 PRKCE  
SARM1 MYD88  
YWHAZ KIAA1429  
PIAS1 DCLRE1A  
BBS9 BBS2  
APLP1 SETDB1  
TP73 EIF2C2  
POLR2C UBE2W  
ABL1 WASF2  
HNRPDL HNRNPA1  
RPS27A MYSM1  
KNG1 GP1BA  
CTNND1 MUC1  
STRN CCT6B  
GRN MEF2D  
SGTA IKBKE  
TGFB1 RPS27A  
DLGAP1 KCNA4  
MAX TXLNG  
LGALS1 LGALS3  
SUMO2 TDG  
UBE2L3 ARIH1  
VHL IREB2  
MSH2 SMC1A  
ELAVL4 NFX1  
FLNC MYOZ1  
SPAG9 KLC1  
CD247 CD244  
SGK1 SLC9A3R2  
ACTN4 TJP1  
IARS IKBKG  
YAP1 RUNX1  
NFKB1 HDAC2  
ECSIT FARSA  
PRKCI MAP2K5  
TMEM33 FTSJ1  
IKBKB MRPL4  
TOP2A SRPK1

NUDT21 KIAA1377  
NSUN4 KBTBD7  
CRMP1 PAFAH1B3  
MYC TUBGCP4  
PLCG1 RAC1  
SNCG GRK5  
UBE2M NEDD8  
BMP4 FSTL1  
YWHAG CGN  
GAPDH CBL  
NEK2 NEK11  
MST1R YWHAH  
SRC ETS1  
ANK3 SPTBN4  
NCAPD3 NCAPH2  
SUMO2 HDAC1  
SH3BP2DBNL  
CIAO1 HLTf  
MRPL41 SMURF2  
GART ARF6  
VCP TNFRSF14  
PTK2B MYH2  
SUN2 BTRC  
ACVR1 DCAF6  
TRIM24NR2F2  
ALPI BICD1  
EIF2C4 DICER1  
CXORF27 HTT  
C7ORF64 CCDC106  
GJA1 SGSM3  
PIK3R2 SHC1  
XIAP COMMD1  
TGFB1 RPS27A  
ZAP70 DUSP3  
FUT7 TLR10  
HTR2C MPDZ  
PRKCG SDC2  
A2M GEM  
DST ERBB2IP  
TNFRSF1B PTPLAD1

MXI1 SIN3A  
TRIM29 TRIM11  
ATXN1 ZNF276  
MLL2 MEF2D  
USP54 CHMP4B  
RANBP2 SLC12A2  
LRIG3 PNKP  
GAPDH AR  
GIT2 GIT1  
ZNF862 ATXN7L1  
RTCD1 CDC5L  
CCNK CCDC85B  
ARL6IP5 SLC1A1  
SYT1 STX3  
UBL4A BAG6  
PHC1 WNK1  
KCNA3 KCNA1  
PPP4C IKBKE  
KNG1 CAPN1  
MYL6B IQGAP1  
CDK1 SFN  
AKT1 AKT1S1  
PTP4A3 HSD17B11  
TGFB1 FKBP1A  
ZBTB16 HDAC1  
YWHAZ C5ORF25  
CASK TANC1  
PABPC1 EIF4B  
RELA SNIP1  
RAMP3 PDCD6IP  
RIPK1 TICAM1  
SUZ12 SETDB1  
MAP3K12 MAPK8IP2  
HIP1 CASP3  
F10 SERPINB8  
GAPDH MDM2  
EPS15L1 EPN1  
TUBB4 NR4A1  
CCT8 MEPCE  
UNC13A RAPGEF2



PPP3CABAD  
PIK3R2 EPHA2  
PIAS1 CASP8  
AXIN1 EEF1A1  
PRRC2B EHMT2  
RFC1 PMS1  
SUZ12 SETD8  
KARS MAPK14  
UBE2U RNF14  
FAM57A GGT7  
MEF2C NCOA2  
TBP RNF4  
DRD1 CALY  
ERBB3 CRK  
SAP18 DDX3X  
ERBB3 CRKL  
PRKAG3 PRKAB1  
BRCA1 NMI  
PFKFB1MAPK3  
ADD1 SMARCC1  
CASK CNTNAP4  
CYCS TNIK  
KPNA5 MEPCE  
YWHAG LRFN1  
PRKCI PARD3  
F2 SERPIND1  
TRIM29IKBKG  
TUBB4 TRAF6  
ALB PLCB1  
KIT PLCE1  
CASK NRXN1  
LCK EZR  
PAK4 CDC42  
TSR1 PINX1  
POLR2B CTDP1  
ELF3 NLRC3  
DDX26B CEP63  
KRAS RASSF5  
MDN1 FTSJ1  
SOCS1 TRIM8

SCNN1A WWP1  
MYL12B PNKD  
GNAZ NMT1  
C3 LRP1  
TOP3A FANCM  
FN1 TSHR  
PCNA DNMT1  
MAPK1 ADAM17  
YWHAG SYNPO  
BMI1 KAT5  
FTCD CLDN19  
PPP2R1B PPP2R2C  
SOS1 GRAP  
PTPN6 PRKCD  
RPS27AE2F1  
PRKCA PTPN12  
HLA-A DERL1  
EIF3K TRAF6  
SRSF6 RRP1  
TJP2 SRRM2  
RBBP5 MYST1  
EPB41 PSMB7  
IKBKE BCL7B  
SUPT3H TAF12  
SLX4 NUP50  
PPP1R12B PPP1CB  
FLNC MYOZ2  
VAV2 TARBP2  
RAPGEF4 RIMS2  
CLIP1 DCTN1  
UBE2L6 SPEN  
HLA-B DDX21  
RPS27ASPTBN1  
APOE SCARB1  
CPSF6 CREBBP  
MYC XPO7  
MAP2 TTBK1  
REM1 YWHAH  
LIG1 INPP1  
FYN LCP2

NCL FMR1  
MED18 MED20  
FLT1 SHC2  
BRCA2 DMC1  
USP9Y PMS1  
EPHA2 CTNNB1  
HNF4A EXT2  
SUMO3 UBE2I  
RAB6A SYTL5  
UBE2L3 TRAF6  
APC TXNDC11  
NBR1 MAP1LC3A  
AR CDK6  
PSMD11 SETDB1  
STAT6 PRKCZ  
FYN PDIA2  
ABL1 TUB  
ARF6 HYOU1  
PRCC MAD2L2  
NR6A1 UIMC1  
SUPT3H DDB1  
YWHAB GAPVD1  
UBC RHOA  
PGK1 PRKAG2  
GAPDHBPGM  
TOM1L1 TSG101  
CDC42EP1 MDFI  
ZFP161 PRMT1  
ESR1 RGS3  
CUL4B NEDD8  
GRIN2B DLG3  
SS18L1 SMAD1  
RARA NRIP1  
APIG1 MAP1A  
GDF5 HTRA1  
SLX4 PNMA2  
FBLN1 MPG  
LMO4 DDB1  
TRAF6 TRAF2  
SP100 SUMO3

ATF7 PTP4A2  
RXRB NCOA3  
NKTR MAPK14  
GAPDHS NTHL1  
SNRPD2 GEMIN6  
FOS KDM2A  
SYNCRIP STK24  
CDK2 BCCIP  
NIPSNAP1 TBC1D17  
MEN1 RBBP5  
ARPC3 ACTR3B  
PTPRC TEC  
SUMO1 SPATS2L  
NGFRAP1 SMAD2  
TOLLIP ZHX1  
PTPRZ1 CTNNB1  
YWHAZ ADAM22  
SUMO1 AGPAT5  
YWHAZ RAI14  
SMARCA4 H3F3B  
ANXA2 ARF6  
VIM BFSP1  
GATA4 MEF2C  
PPP6C PPP6R3  
GRIA1 GRIA2  
TAF15 ZNF384  
VTN ITGA8  
FIP1L1 WWOX  
ABL1 PAX3  
SHC1 MAPKAPK2  
SUN2 USP20  
LCP1 ATXN2  
DYNLL1 ASF1B  
SNW1 ZSCAN1  
HDAC3 CCT5  
RPS3 RELA  
UBE2H TRIM56  
PSMD11 PSMD6  
DMD ANK2  
DHX15 WBP4

SPTAN1 FANCF  
ASAP2 PIK3R1  
TCEAL1 PPP2R2D  
VIM MRPL44  
BACH2 PATZ1  
RGS12 YWHAG  
CHEK1 MCPH1  
S100A4 SEPT7  
PLCG1 ZAP70  
PLCG1 SYK  
TPD52 YWHAZ  
IL2 IL21R  
RANBP2 PAN2  
ERO1L ERP44  
MET GAB2  
CTNNA1 PKD1  
CEP70 RCOR3  
NR1H2 RXRG  
DAG1 WWP1  
HOXB1 EP300  
CDK4 MCM2  
AES STYXL1  
PAK1 CRIM1  
EPRS POU2F1  
GCLM FTSJ1  
AP3B1 ARRB2  
FYN AKAP6  
HLA-B NAA15  
PCNA POLI  
SCGB1A1 LRP2  
CDC27 PTEN  
TNIK MYT1L  
CCL21 CCR7  
NAP1L1 DLST  
DCTN5 NINL  
MAPK3 LIPE  
TRDMT1 EPPK1  
GSPT1 BIRC3  
PIK3R1 ANK3  
ARPC3 THNSL2

RHOG ELMO2  
MAVS IFIH1  
NFKB2 RELB  
HNRNPF TXNL4A  
ITGB2 ICAM1  
PPP2R1A CTTNBP2NL  
GUCY1A3 AGAP1  
DIAPH1XPO6  
PTCH1 SHH  
RUNX1T1 HDAC8  
UBXN11 RND1  
CD72 SYK  
NUP98 PARP11  
OS9 EGLN3  
GSPT1 BIRC2  
TOM1L1 FYN  
ENO2 HABP4  
CASK SPATA2  
NR2F2 BCL11A  
XPA EP300  
HLA-B AASDHPPT  
PRMT1 CARM1  
ISG15 SEPT2  
AR BRCA1  
CBL KDR  
ERBB2 PIK3R1  
EWSR1 YY1AP1  
UBR1 BTBD2  
PGK1 HSP90AB1  
RAG1 NCK1  
ACTN1 CSRP1  
UBC DTX1  
NFATC1 PIM1  
MAPK6 TNRC6C  
ESRRG DAXX  
MEF2A PINX1  
EMD MCM6  
GSN PLCG1  
PFDN2 STAP1  
MYC DDX20

CSPG5 GOPC  
UTP20 KIAA0649  
CTNNA1 JUB  
PRNP RBM22  
PRPF40A CPSF6  
IFRD1 MYOD1  
EXOSC10 UPF1  
DGKZ SNTB1  
WASL CRK  
EPAS1 EGLN3  
GIPC1 ITGA5  
AKAP10 PRKAR2A  
CAD MAP3K3  
PCBP1 SF3A2  
RHO GRK5  
ARVCF TJP1  
HRAS ITSN1  
TP53 SMYD2  
PRPF6 SNRNP40  
THRB RXRG  
PTPN6 PTK2B  
APC YWHAZ  
RING1 PIK3R3  
TRAPPC3 TTC15  
SMNDC1 SF3B2  
EPHB1 GRB7  
FOS ZNF652  
CHEK1 TP53BP1  
PRMT5 DPEP2  
CTNNB1 PTPN12  
NUP62 IK  
BIN1 RIN2  
TAF1 GTF2F1  
SNTA1 MED8  
CSNK2A2 MEPCE  
PPAP2CBAG6  
ZNF598 ZIC4  
LMNA SREBF1  
POLR2G RPAP2  
EP300 CDC16

XRCC5 ILF2  
AES SNCAIP  
RAB11FIP3 RAB11FIP4  
CDC42 SF3B2  
FLNA VHL  
PSMD4 UCHL5  
CDC42 UNC119  
HHEX GATA6  
NFATC2 FOXP3  
CLU ZNF24  
MYF6 ID2  
CLTC IKBKE  
YWHAZ SH3BP4  
KIF5B NDRG1  
MAP1B STRAP  
TLR4 NDUFA2  
ATP5I TAF9  
TPM3 C19ORF50  
EPHB6 EPHB1  
MAPK11 MAPKAPK5  
RET SHC1  
ACVR2A DAXX  
NOS1AP SYN2  
CRTC2 SIK3  
GNB5 GNG2  
ADRA1D SNTB1  
ZNF747 SUFU  
NFIB NFIC  
BIRC5 BECN1  
KRT18 CBL  
NGFR TRADD  
APOE RPS27A  
TULP2 EWSR1  
MYC ATP6V1H  
KEL EWSR1  
SRSF6 SRPK1  
UBR1 TAC3  
MTOR RICTOR  
MCC AHCY  
TRIM29MAD1L1



MAD2L2 POLDIP2  
EP300 PRDM2  
SHBG ACTB  
USP13 FUNDC2  
NFKB1 TNIP3  
UBE2I MAPK1IP1L  
FAS BTK  
KCNJ4 SNTA1  
NANOS3 GUCY1B3  
HSPA1B AR  
RPS29 ARF6  
RPL22 VHL  
GABARAPL1 ATG4B  
MYC GSK3B  
POLR3D APEX1  
MYC GSK3A  
ATXN7 EP300  
SRF ATF6  
YWHAG MICALL1  
NCOA6 TXNRD2  
AKR1B1 IKBKE  
ATM MCPH1  
BCL2 NLRP1  
PYGM PACSIN3  
CDKN1A CDC6  
HR TRIM27  
TSPAN4 CD46  
CASP4 SMC3  
PRDX1 ADRM1  
DAPK1 TRADD  
EEA1 MAPK14  
SRC CARM1  
EXTL3 GRB2  
BCL2 BAD  
NGFR NFKBIB  
MYC IPO11  
PRMT2 DMRTB1  
PSEN1 BCL2L1  
SERPINF1 MYOC  
PXN REPS2

UBE2L6 SIAH2  
PRKCA PA2G4  
RPA1 TOPBP1  
YWHAZ SH3BP5L  
CTBP1 HDAC5  
ARPC4 RNF130  
CEBPB RUNX2  
TP53 BLM  
SGK1 SLC1A3  
SIP1 LGALS1  
CASP3 AKT3  
TLE2 BARHL1  
IKBKE LSM12  
FHL5 KIF17  
GOLGA3 TRAF2  
HOMER3 ABI3  
KIAA0319 SH2B1  
PTCH1 HIPK2  
IKBKB YWHAB  
PLSCR1CRKL  
TRIM27TUBGCP4  
GRB2 CALD1  
SOCS6 TUBA1A  
IARS TSC22D1  
CUL5 ASB2  
EIF3K PRKAB1  
PLSCR1CRK  
CRKL LTBP4  
GSK3B DCTN1  
PRPF4 ATP5J2  
USF1 GTF2I  
HNRNPH2 MEPCE  
CSNK2A2 CSNK2A1  
PYGB APC  
CASP3 PDE10A  
DAG1 PRX  
OAZ2 OAZ1  
WWP1 RTN4  
MRPS6 KIAA1377  
ADAM15 SNX33

STX1A SLC6A5  
TGFBR1 RHPN2  
NRP2 PGF  
EIF4E EIF4A2  
DAZAP2 GPSM1  
ASGR1 RBBP6  
SLC2A4LNPEP  
SELE VCL  
COPS5 FBXO17  
HOXA1 PKNOX1  
GLRA2 GPR108  
ZNF24 EEF1A1  
FKBP2 BAG6  
STX4 STXBP5  
IL2RG IL15  
TRIM37MAGEB18  
PGRMC1 TRAF6  
ERCC2 GTF2H1  
ATP6V0E1 ATP6V1E1  
ATF2 SMAD3  
MED7 PARP1  
UBE2L3 PRKAB1  
DAD1 MCL1  
TGFBR1 GNB2  
KCNH4 MOBKL3  
POLR2F MED19  
CASK SDC4  
SUPT6H IWS1  
SCGB2A1 SCGB1D1  
PLCG1 RHOU  
IPO8 RANGAP1  
XRCC5 NDRG1  
ZNF197NDEL1  
SCNN1B HECW1  
ZAP70 SLAMF6  
WASL EVL  
SIX3 NR4A3  
ETS2 MAPK6  
TNF IFNG  
UBE2D2 TRIM5

GSK3B TRIM29  
UBE2D2 TRIM2  
HSP90AA1 PRKCZ  
MID1 UBE2D2  
CGA LHCGR  
BRMS1 HDAC6  
TFCP2 HUWE1  
PML ARID3A  
GRB2 C11ORF41  
UBXN1 ASF1B  
IFNAR1 STAT3  
FUCA1 USP21  
RPS9 FTSJ1  
MCM3 PLK1  
RPS27AKIAA1310  
TUBB2B RIPK3  
KRT15 KIAA1217  
STAU1 RASA1  
MSH2 MAX  
ITGB6 FHL2  
SF3B1 MELK  
CTCF SMC1A  
CAV1 STOML3  
XPO1 AHR  
ESR1 RNASEH2A  
HLA-B MAGEA1  
HLA-B MTPN  
NUP98 TNPO1  
HNRNPA1 PRRC2A  
HNRNPH1 KHSRP  
IKBKE CPSF6  
MEF2D PTRF  
FN1 SRC  
PHLPP1 USP12  
SKIL ZBTB6  
YWHAE RAP1GAP2  
DCN ELN  
TAF1 TBPL1  
SERPINF1 CSNK2A1  
MCM7 RBL2

LPL LRP2  
ARF6 RABGAP1  
IDH3A PSMD4  
DSPP PKP4  
BDNF SORT1  
BMPR1B UBXN1  
HDAC1 NONO  
PARP1 ZBTB9  
RANBP2 RAN  
LPL VLDLR  
TRIM8 UBE2D4  
TBCD IKBKG  
RPS15AEWSR1  
HMGB1MNT  
ESR1 SMARCA2  
ESR1 SMARCA4  
NF1 SMARCA4  
GC PIK3R3  
IKBKE TBR1  
UBE2L6 SIAH1  
ATG5 ATG3  
CCND3 NCOA2  
DES TRIM63  
TCEB1 USP33  
OTUB1 CNOT8  
NFKB2 REL  
SYK GRB2  
DIAPH2CENPA  
ATXN1 CPSF7  
MLH1 EIF2A  
RGS2 EIF3E  
SGK1 PIGR  
SLC50A1 TRPV2  
SYK RPS27A  
SKP1 SUGT1  
SERPINB3 CTSO  
GSK3B HNRNPD  
ICAM3 PRKCQ  
PIK3R1 FASLG  
CYB5R3 CYCS

CCDC7 EWSR1  
SLC38A1 TUBB2A  
PTK2 TNS1  
STAC NCKIPSD  
SNRPD3 DDX20  
STAT3 TRIP10  
PCNA DDB1  
PDE6G GRB2  
CTNND1 YES1  
DDB1 AMBRA1  
PSMB8 TAP1  
DYDC1 MID2  
PSMB8 SEC14L3  
CDKN1A MAP3K5  
KRT15 MAD2L1BP  
PSMD3 USP14  
PSMD4 NUB1  
PRPF4 COLEC11  
MYST1 BAZ2A  
TAF7 TAF9  
CASP2 CSNK2A1  
EWSR1 TRIM5  
CASP6 NUCB2  
CBS HTT  
PSMA3 TRIB3  
ZBTB16FHL3  
HDAC3 RPS27A  
SYNCRIP IVNS1ABP  
HGS ESRRG  
TFCP2 CASP8  
RAB9A TM9SF2  
PRKAR1A XRCC6  
POLR2B IKBKG  
NFYA SREBF2  
TBPL1 ABCF3  
FLNA MAP2K4  
PLSCR1YIPF3  
IREB2 RPS27A  
SERPINB3 USF2  
KIAA1267 PLEKHA5

RALA RALBP1  
BMI1 RING1  
RNASE4 ACTN2  
PPARG KIF1A  
BRCA1 STAT3  
ITGB1 AIDA  
UROS UBQLN4  
PSEN1 DNER  
YWHAQ CCAR1  
WWP2 UBC  
TGOLN2 GGA3  
ZNF263 ZSCAN30  
NUF2 EXOC1  
CDC42 LMO7  
UBE2M TRAF6  
TGFA ERBB2  
PLIN2 ABHD5  
EGFR AP2M1  
CDC42 PLD1  
HDAC1 PIAS4  
PFKL ATN1  
MAPT CDK5  
RYR1 CALM2  
HADHA GABARAPL1  
PPM1A DVL3  
CDKN1A TEX11  
IRAK2 PELI1  
MDM4 SFN  
PPARG FOXO1  
MDM4 YWHAB  
EGFR RAB3A  
TAL1 CRK  
HDAC3 ZBTB16  
APC2 MAPRE3  
RB1 MNAT1  
MECP2 SIN3A  
USP11 PKN2  
COL1A1 TGFBI  
DEPDC1B E2F5  
PGR EP300

NR1H3 NR0B2  
ARL4D EML4  
SNAP29STX4  
EWSR1 PRUNE2  
ZNF250 HOOK1  
IL6 PTHLH  
PAX9 TLE2  
MSH6 BLM  
PAX9 TLE1  
TUBB TTK  
POU2F1NFYA  
MAFF HDAC5  
CIAO1 HEATR2  
PLCG2 FLT1  
RB1 USP4  
UNC119 ZFP64  
RPS27AMAP4K3  
CDC73 MLL3  
HES1 FANCE  
TP53 WDR33  
CTBP1 EHMT1  
UNC119 LAMA4  
HSBP1 HSPA4  
ELAVL4 EWSR1  
EPHA3 STAT3  
PTK2B RHOU  
SF3B3 SF3B2  
CALCOCO2 FASTK  
MCM7 SSRP1  
SUPT3H MED13  
PHB TCEAL2  
NFASC SDCBP2  
ILK RPAP1  
WRNIP1 OSBPL10  
DCAF7 MAP3K1  
EFS LYST  
ETF1 PAN3  
KRTAP4-12 BEX2  
MAPK1 FHL2  
LHX2 CITED2



EFTUD2        USP39  
GOLGB1        KIAA1377  
TNFRSF1B      MON2  
BCAR3   EEF1D  
EIF3J   CASP3  
TRIM23   UBE2E2  
SFN    IRS1  
TPT1   CDC42  
SUMO1   BRE  
UBC    STAM  
ZNF629   ZNF434  
DLG1   BEGAIN  
FOXO3   GBAS  
EZH2   ATP1A1  
CDC25A        CCNA1  
MDM2   UBE2Z  
CD3E   PTPN22  
NAA38   ISOC2  
BARD1   BRE  
RPN1   WSB2  
SMAD9   TRIP12  
MED29   MED11  
IL12RB1        IL23R  
COL4A1        COL4A2  
TP73   SMAD3  
BCL10   PELI2  
HIST1H4I        SETD8  
DFFA   BAK1  
CA2   DYNLL1  
CAD   MAP3K14  
STAT5A        TSLP  
EPB41   VARS  
TNNI2   PKD2L1  
ALOX5   COTL1  
MARS   MAP3K1  
TCF7L2   CTNNBIP1  
SQSTM1        SRRM2  
ALDH7A1        DDA1  
SCN5A   INADL  
RAD23B        TDG

KIFAP3 SMC3  
MYC MCM7  
PIK3R1 AGAP2  
RARB NCOA3  
PLEKHA7 KIAA1543  
ABL1 RPP38  
LRRK1 C9ORF163  
BAG3 SQSTM1  
CRY1 TRAF2  
PEX14 HDAC1  
FGFR1OP2 TRAF3IP3  
RXRA ACVR1  
UBE2I ZYX  
HSPA1B BCL2L12  
RRM1 RRM2B  
CBLB SORBS3  
RAB25 SMAD4  
CCM2 PDCD10  
SNTB2 MAST2  
SMAD1 ELP3  
TP53BP1 ATM  
SNRPC EWSR1  
ITGAM JAM3  
PDE6G MAPK3  
MAGEA11 NDUFB9  
EP300 PAK2  
PFDN5 IKBKG  
FKBP4 PRKAG2  
CD74 HLA-DMB  
CD74 HLA-DMA  
HDAC2 H2AFY2  
RPA3 CNBP  
PLK4 TGFBR1  
RPA3 TSC22D1  
RNPS1 UBQLN4  
HELZ SH3YL1  
EZH2 EIF2C2  
PABPC4 MED31  
PPP2CASIKE1  
EGLN1 HIF3A

ATOX1 ATP7B  
BECN1 PIK3C3  
LMNA TOR1AIP1  
FXR1 LUC7L2  
ORC3 PLCG2  
UBE2M CAV1  
NUP107NUP160  
PIAS4 ZHX1  
MATN2 COL4A2  
ABL1 CYP4F2  
ACTL6A SMARCB1  
OTX2 ATXN1  
EIF3D ETS1  
CDK5 NDEL1  
INADL PARD6A  
HIVEP3 WNK1  
PRPF40A SRRM1  
PSMD4 TRAF6  
AGFG2 EPS15L1  
LMNB1 SPTAN1  
PRRC2B EHMT2  
XRCC5 TFCP2  
ALDH2 HSPE1  
EGFR FAH  
ESR1 CDK8  
ARCN1 COPZ2  
MAPK1 SCRIB  
AK2 MEPCE  
YWHAG SRSF4  
ABL1 SH3BP2  
SKP1 KDM2A  
TIMP3 KDR  
ARSE C19ORF6  
AP2A2 DAB2  
LGALS1 CDC42  
YWHAZ REPS2  
NOTCH2 MAML2  
STAT6 STAT2  
HOXA1 CHIC2  
GNA13 ARHGEF1

HSF1 CAMK2A  
H1F0 KPNB1  
USP10 CELF1  
ONECUT1 FOXA2  
SLC25A5 RELA  
PPIB UBQLN4  
RAB8B TES  
HDAC3 HDAC4  
PNP TFB2M  
STRN CCT5  
LCK ADAM15  
RCC1 HIST2H2BE  
VAPB STX4  
DYNLL1 SHROOM3  
THRB NRIP1  
BFSP1 BFSP2  
CALCOCO2 ZNF408  
PCBP2 POLR3H  
GABARAP BRP44L  
CUL5 CISH  
MCL1 BIK  
CUL4B VPRBP  
RAP1GDS1 MBIP  
CDK8 MED23  
CDK1 USP16  
TP53BP2 MAGI1  
NUP214RAE1  
TAF10 PCBP1  
RB1 NEFM  
TFRC TRAF6  
NAP1L1 TRAF2  
ID1 CAV1  
MAPK1 C1QBP  
HSF1 CHD3  
PML ZNF506  
TJP3 CLDN1  
TKT ACTR6  
PFN1 DNM2  
PPM1D H2AFX  
SPRY2 RAF1

CDK9 SART3  
CBX1 BAP1  
KRT10 NFKB2  
ABL1 CNTNAP1  
MADD NPDC1  
PPP1R3D FYN  
TBP BCL3  
MTHFD2 PSMD13  
EXOC8 RAB3IL1  
GRIK1 DLG4  
WRNIP1 USP25  
HAP1 KIAA1377  
GNAI2 MTNR1A  
ID3 TSC1  
KLHL26 ACIN1  
PARP1 TCF4  
RPS4X MEPCE  
TSSK4 SMURF2  
ERCC6L RB1CC1  
ITGB5 PDIA3  
UBC TAB2  
PTBP1 QKI  
NFKB1 SMG7  
YWHAH PRKCZ  
PRKAB2 STIM2  
MYBPC3 SMURF2  
PRNP NHP2  
ETS2 CDK10  
NAP1L1 FTSJ1  
CASP3 KCNIP3  
PRKCE BTK  
CDK9 CDK5R1  
MCC APEX1  
MEN1 GFAP  
ALDH1A1 BRCA1  
IKBKAP PBX2  
DSPP PKP1  
COPS4 KLHL13  
SERPINI2 UBQLN4  
DLG1 LRRC1

EFNB1 PTPN13  
CSNK2B CD163  
ATR PA2G4  
TUBB GRM1  
BUB1 APC  
GNAI2 RIC8A  
SCN5A NEDD4L  
HSF1 SMARCB1  
AXIN1 JUP  
FYN CBL  
EP300 ZBTB17  
PRNP HOXA1  
CTNNB1 CASP8  
SNRPD3 GEMIN7  
NR4A1 EP300  
ATP2A2 S100A1  
GPS2 HDAC5  
RB1 PAX6  
PGR RBM39  
PPARD EP300  
PLCG1 GNB2L1  
COX5A TH1L  
SSNA1 SPAST  
PINX1 DDX21  
NRAS SHOC2  
HSPH1 DYNLRB1  
SRGAP2 ATAD3A  
LCK UNC119  
HSPA4 MARK4  
CDC42 CDC42EP5  
CFH DMP1  
RB1 DNMT1  
TUBB MAP3K1  
BNC1 PICK1  
POU1F1PPARG  
APC PPP2CA  
TBP MCM2  
PCNA ING1  
SYT9 NRXN1  
SUPT5H KIAA1377

POLR3D HOXC9  
IMMT ASCC2  
PAX6 SIX3  
PTPN11 DDR1  
CFLAR CASP7  
CFLAR CASP6  
FBLN1 SMAD4  
ELF3 MED23  
MCC FKBP3  
HAPLN1 VCAN  
EPRS ETS1  
SF3A1 TNFRSF10D  
SMURF2 ANAPC5  
ANKRA2 AHRR  
RANBP2 RPS6  
UBE2I EXOSC9  
PTPRC TEK  
H2AFX XRCC1  
TFCP2 RBBP6  
IARS TRAF6  
PLCG1 FCGR2B  
PLCG1 FCGR2C  
ATN1 AES  
SLIT3 CAPN1  
RPS19 NFKB2  
ZDHHC3 EWSR1  
MRAS RAPGEF5  
SAP18 DNAJA1  
NFYC DST  
HNRNPH1 CELF1  
ATR CEP164  
FOS CACYBP  
ACTR2 BAK1  
WT1 U2AF2  
MTOR GPHN  
COL4A1 FBLN2  
FGFR2 STAT3  
TUBB2B TRAF6  
PRKCQ CARD11  
APOB PDIA4

PRKD2 RRBP1  
CRKL ABI1  
DHX30 MYBBP1A  
HDAC2 HMG20B  
MAPK3 PRKCZ  
NR4A2 COPS5  
SRC PLD2  
LRRK1 RIMS1  
POLR3D HOXA10  
PHB DHX36  
MED13 MED19  
SREBF2SMC3  
PEBP1 SMYD2  
MDM2 MED1  
PDCD4 BTRC  
TAF6 TAF9  
EGFR SH2D3A  
CCL1 CCR1  
ITGAM PLAUR  
ITGB1 CD47  
POLR3C GTF3C5  
PAF1 LEO1  
SRSF3 MEPCE  
TDP2 TRAF6  
IMMT CCDC113  
MAX CSNK2A1  
TGFB1 DIP2A  
ESRRA NCOA1  
MAPK3 SNCA  
HSBP1 HSPA1B  
GNA15 LTBR  
EIF1B TAGLN2  
HNRNPA3 CNBP  
ASF1B C15ORF41  
DAB2 LRP2  
IGFBP3 GTF3C1  
POLR3C GTF3C3  
GPS2 WNK1  
MEF2C COPS5  
HNRNPH1 DDX17



VRK2 KSR1  
GGA3 SYNRG  
CDK14 CDKN1A  
RBBP7 BRMS1L  
BMPR2 CCDC89  
HDAC3 RELA  
RXRA NPAS2  
MID1 PPP2CB  
SASS6 CEP250  
SUMO2 CUL3  
EPOR PIK3R1  
RNF181 UBE2D4  
YWHAG SAMD4B  
FES STAT3  
UBC TNFRSF1B  
AXL GRB2  
ZNF259 SNUPN  
OPTN TBC1D17  
USHBP1 DYDC1  
RAD51 WRN  
CUL4A DCAF10  
KRT1 IVL  
SRC CDKN1B  
CCDC158 GPSM1  
MAP3K7 MAP2K6  
AXL RPS27A  
TH1L HDAC11  
CREB1 MAPKAPK2  
AHSG CDC42  
UBE2I RNF4  
LGALS3BP PHB2  
TLE4 POU2F1  
PDE6D GNAI1  
PIK3CASLC9A3R2  
NAA38 USP39  
NBN WRN  
EPB41 TCEB1  
EP300 DTX1  
TBP REST  
BUB3 BUB1B

UBE2I PHC1  
ABCA1 LIN7B  
KHDRBS3 NUDT18  
PTPRB TNC  
DUSP1 RPS27A  
RB1 PRDM2  
ACTB WASF1  
RAB4A CD2AP  
COL2A1 COL9A2  
EIF3H EIF3M  
TP73 MDM2  
IKBKE CDC37  
TSC2 SMAD2  
VIM NIF3L1  
FANCA ALDOA  
C3 ASF1B  
MYL9 TP63  
COL2A1 COL9A3  
KPNA4 ARRB2  
NFATC1 KAT2B  
RGS3 MAPK12  
GTF2E1MED21  
KRTAP4-12 KRTAP3-2  
THY1 ITGAM  
GSK3B TSC1  
SNRNP70 SMAD3  
ETS2 ZMYND11  
EPHA3 CALM2  
U2AF2 SRPK2  
TAF4 TCF12  
EIF1B TALDO1  
XRCC5 SUPT4H1  
ZBTB16PMAIP1  
BRCA2 KAT2B  
UBE2I GTF2I  
STAT3 NCOA1  
IARS MAGED1  
AKT1 MAP2K4  
FLNB NCK1  
TYROBP NCR2

ARF6 C20ORF4  
HNRNPH1 MBNL1  
ZNF250 KRTAP4-12  
NOL3 CSNK2A1  
AP2A1 PICALM  
PTK2 RIPK1  
CD2BP2 DDX23  
SART1 USP39  
AMPH SH3GL2  
TP73 CCNT1  
SKP1 BTRC  
TIMP2 MMP8  
ARPC3 PRMT1  
SNAPIN SNAP25  
CCND3 DMTF1  
KRT15 NUDT18  
RET SRC  
RAB2A GORASP2  
RPL5 RRP1  
TAF1C POLR1E  
MCM5 CDC5L  
TMEM109 TRAF6  
PDCD6 FASLG  
GTF3A GTF3C2  
BCAR1 TNK2  
HCFC1 THAP7  
CDK5RAP2 SENP2  
AIRE HSPA5  
VAV1 NEK3  
TCEB2 PAN2  
TOB1 CNOT6L  
ZNF182 SAP30BP  
MAGEC1 MRPL15  
ARPC4 TH1L  
CASP6 UBE4A  
SDCBP GRIA4  
FLII MYD88  
FES HSH2D  
DYNLL1 PARD3  
VHL NR4A3

HGS PFKM  
EGFR PLCG2  
TNKS FNBP1  
NCOR1 NR1H2  
GTF3A CHMP5  
ATP5C1DPP3  
RAPSN DAG1  
POP5 RPP25  
PPM1B ARRB1  
KAT2A MED17  
EPB41 PHB2  
PRKCA TRPV6  
EXOC1 MACF1  
NUP62 AHCTF1  
RRAS2 RALGDS  
TNFRSF14 C2ORF47  
ACTB TSC1  
LYN ITGA4  
PFN1 VASP  
JAM2 PARD3  
HMGB1TXN  
EPX PLCG1  
ATP2A3 BRF2  
CIT GPRIN1  
PPP4C PPP4R2  
MAP2K1 PARVA  
ZBTB3 IKBKG  
ATAD3B C20ORF24  
PTBP2 QKI  
ERBB2 CD82  
DMD CADPS2  
RAD51L3 DCD  
NR4A1 RXRG  
RNPS1 SRPK1  
SREBF2KIF5A  
NR2F1 NCOA3  
EXOSC10 MPP6  
MAPK1IP1L EWSR1  
FLII PRMT1  
CTTNBP2 STRN4

IMMT STMN4  
MDM2 USP7  
CLYBL SH3KBP1  
AFF1 AFF4  
EPS15 AGFG1  
LAMA5BTBD10  
ABL1 LRBA  
TGFB3 TGFB2  
CEP76 SALL2  
PPP1R16A CDH24  
GUCY1A3 STUB1  
PSMB5 PSMB3  
PSMB5 PSMB2  
PBX2 CCDC88B  
EXOC2 EXOC1  
PIK3R1 SREBF2  
TRIP12 USP7  
HSPA9 TBK1  
APBA3 EGFR  
COIL DNAJA3  
CCT5 IMMT  
ALS2CR11 TEX11  
NR3C2 PROX1  
MIB1 UBE2W  
BLM SMC1A  
PTN PPP2CA  
PIK3R1 WASF3  
HLA-DQA1 UNC119  
CEBPB KCNH4  
PTPRB CTNNB1  
CHMP2A PCBD1  
UBC GRB2  
MLL TAF9  
UBE2D3 DTX3  
RRAS2 RABAC1  
DNAJA1 NFKB2  
ID3 RND1  
CASP2 CASP10  
ADRBK1 BDKRB2  
CSNK2A1 TCF7L2

POLR2C GTF2H1  
XRCC5 CHD1L  
SORBS2 DLGAP4  
KRT85 CDK12  
NUAK1 S100A9  
NANOS3 RNF31  
IL20RB IL20  
BCL6 BCL6B  
HLA-B EXOSC4  
LTBR BIRC2  
HTATSF1 SNRPB  
GAPDH SLC2A4  
RAD52 WRN  
RARB NCOR2  
HLA-B NACAP1  
JAK2 PPP2CA  
RNPS1 RANBP9  
RAF1 RBL2  
CTBP2 RAI2  
TOM1L2 RNF11  
LRP2 SNX17  
KRTAP4-12 MRPL4  
YWHAZ DCD  
IMMT FEZ1  
KCNA3 DLG4  
PIAS4 LEF1  
AKT1 APLP2  
FXR2 CALCOCO2  
DAZAP2 ZNF581  
INSR MAD2L1  
NUP62 IK  
H2AFX HIST2H2BE  
RHOA CNTNAP1  
RAC1 NOXA1  
YY1 PRMT1  
CDK6 MCM10  
EIF1B EIF3G  
SNAP23 SYN2  
VCP RPS27A  
ARFGAP1 CYTH2

SOS1 KDM2A  
NUP62 TRAF3  
SMARCC1 SIN3A  
AIF1 ACTA1  
MLH1 PTPRH  
ZBTB7A NCOR2  
MTA2 HNRNPD  
TOM1L1 CLTC  
USP1 HSPB1  
APLP1 HLA-DQA1  
MED13L MED19  
TRAPPC3 TRAPPC6A  
PAXIP1 MAST1  
PABPC4 SETDB1  
GAS2 CAPN2  
EWSR1 EPT1  
THRB ACVR1  
SMAD4 PIAS3  
AGTR1 DNAJC14  
CTNNA1 TJP1  
LCK GRAP  
GAPDH CCNB1  
RNPS1 CCNL2  
MAP3K10 MAPK8IP1  
RNF220 USP7  
HIST1H2AL GADD45A  
PJA1 ASCC2  
NR3C1 SRSF5  
TK2 TLE1  
TRIO FLNA  
SRC POU2F1  
RPA1 MCM2  
FYN IL3RA  
MAGEA11 TCEA2  
TNFRSF1B DDB1  
WNK1 SRRM2  
PIAS2 PARP1  
NFYC ATF6B  
UBE2D2 POLL  
GATA1 HDAC4

MTNR1B GNAI1  
A2M IL10  
FYN CNTFR  
NCBP2 NCBP1  
HLA-DQA1 CD74  
CD5L CD40LG  
HSPA1B BCL2  
NR3C1 TRIM28  
CDC37 TNFRSF14  
CDC25B MELK  
DHRS1 MDFI  
NUDT18 TIFA  
MITF BMP7  
NFKBIE IARS  
PIK3R1 GAB2  
YWHAZ SUPT6H  
USP14 PSMD13  
ARF6 PFKP  
CDH9 CDH7  
ABL1 BMP8B  
EPOR PTPRG  
LTF MUC7  
ADAM15 SH3GL2  
ESR1 RARA  
EGFR VAV1  
ESR1 AR  
PDGFRB PTPN1  
CTBP2 EP300  
SAP18 ARMC6  
TRIP6 RERE  
CDC37 GCDH  
EIF1B ARPC4  
EPOR PTPRB  
CACNA1A CABP1  
LTBP4 TRIB3  
RPA1 ASCC2  
EP300 GPS2  
SH3BP2VAV3  
ELL SIRT2  
KRT2 EVPL



ITGB5 NUMB  
FOS MARK3  
SHBG DSTN  
CAMK1CAMKK2  
CDC34 FBXO4  
CDC34 FBXL3  
CDC34 FBXW2  
DSPP CASP10  
PLRG1 SRRM1  
UBE2D3 SIAH1  
DCP1B DCP1A  
CPSF3LMDFI  
RAB4A DYNC1LI1  
MAP3K7 IL17RD  
ARF6 PLD1  
ACTG1 NFKBIB  
SNAP23SNAPIN  
MPP5 MPP4  
KRT18 YWHAG  
EPHA3 EFNBI  
SIKE1 FAM40B  
NF2 VPRBP  
SOS1 SPTAN1  
UBC TAX1BP1  
CCNB1 TSC1  
NDUFB1 EWSR1  
TGIF1 CTBP1  
MAGEA11 SH2D4A  
HOMER1 RYR2  
TAOK1 DAXX  
TFG KIAA1377  
RBBP9 RBL1  
RRAS2 ACVR1  
EDN1 CMA1  
CDK1 EPN1  
ARL4D SMURF1  
PLA2G4A KAT5  
HMGB1PRKDC  
DSPP EVPL  
HSPG2 GF11B

RANBP2        TGFBI  
NPM1   CENPF  
ARPC3   WASF2  
ZNF43   APC  
SYK    TUBA1A  
MAPK3   PRKCD  
MLH1   MRE11A  
ACTG1   TRADD  
PKM2   ARRB1  
SMAD2   RASL12  
MBP    PLP1  
AR     TMF1  
AGTPBP1      CBY1  
ASF1B   MRPS7  
TRIM24   CBX1  
LCK    SQSTM1  
SUMO2   TP53BP2  
CASP3   BIRC7  
SF3A1   CDC5L  
REL    NFKB2  
TBP    PAX5  
STAT3   HES5  
RAC1   KTN1  
USP11   XIAP  
VAMP8   STX8  
KLF1    SMARCE1  
YWHAB        PRKDC  
URM1   ASCC2  
VPS37A   TSG101  
DCTN2   RPGR  
PARP1   TCF3  
TERF2   PPP1R10  
PRPF40A      ABI1  
UBE2N   BIRC3  
RPS6KA5      NR4A1  
PTGER1        PTGDS  
TKT    HLA-B  
RPS24   TAF9  
NUDT18        EVI5L  
SMAD7   PIAS1

LPXN LIMS1  
PSMC2 PSMD13  
CTNNA1 FAM84B  
CLTC PLCB1  
CD40 CD40LG  
MEF2A SMAD4  
SH3GL2 SLC17A7  
PPP1R15A HSPA1B  
COL3A1 THBS1  
ERBB2 MATK  
GABRB1 C1QBP  
SAP18 GSPT1  
RFC1 BLM  
RBFOX2 RBFOX1  
ID3 FHL2  
TSC22D1 IPO9  
HDAC3 HIST1H4I  
FLT1 CRK  
AES SIX3  
DPM2 PIGP  
PRNP CIRH1A  
MPST RAE1  
FBLN1 MFAP5  
VHL RHPN2  
BAG6 B2M  
PLXNB1 RHOA  
PLXNB1 RND3  
ERBB2 ABL2  
BRCA1 ACACA  
GJB6 GJB2  
TBP TAF6  
TRIM28UBE2U  
DNM2 SLC7A9  
ERBB2 TEC  
XPO1 NUP214  
ERBB2 TXK  
HDAC7 IKZF3  
ANXA1 USPL1  
MCF2L RHOA  
BIRC3 XAF1

TNFRSF14 PRMT1

NR5A2 UBE2I

FANCA DAXX
