# Supplementary material for: A computational approach inspired by simulated annealing to study the stability of protein interaction networks in cancer and neurological disorders
Source: Springer Nature journal article supplement (doi:10.1007/s10618-015-0410-5), 2015-03-20
Supplement: MOESM3 [file 11710956]

**A Computational Approach inspired by Simulated Annealing to study the Stability of Protein Interaction Networks in Cancer and Neurological Disorders**

Data Mining and Knowledge Discovery

Kristina Ibáñez<sup>1,2</sup>, María Guijarro<sup>1</sup>, Gonzalo Pajares<sup>1</sup>, Alfonso Valencia<sup>2,§</sup>

<sup>1</sup>Departamento Ingeniería del Software e Inteligencia Artificial, Facultad Informática, Universidad Complutense, 28040 Madrid, Spain

<sup>2</sup>Structural Biology and Biocomputing Programme, Spanish National Cancer Research Centre (CNIO), 28029 Madrid, Spain

<sup>§</sup> **Corresponding author:** Dr. Alfonso Valencia. Tel: +34 917328000; Fax: +34 912246976; E-mail: [avalencia@cnio.es](mailto:avalencia@cnio.es)

## Deterministic Simulated Annealing Description

Description of the Deterministic Simulated Annealing:

**Begin** initialize  $nE, W_{ij}, S_i, S_j, i, j = 1..N$

$t = 0$

**do**  $t \leftarrow t + 1$

$$nE = \sum_{i=1}^N \sum_{j=1}^N w_{ij} S_i S_j$$

$t = t + 1$

**until**  $t = tmax$

**end**

whereas:

$nE$  is the system's final energy.  $t$  corresponds to a gene expression sample in each dataset and type (Normal, Cancer, Neurological).  $W_{ij}$  describes the weight explained in **Equation 2**, representing the existing influence between nodes  $S_i$  and  $S_j$ . In our approach  $S_i$  is the significance level of the expression or no expression of each gene.
