# Supplementary material for: A computational approach inspired by simulated annealing to study the stability of protein interaction networks in cancer and neurological disorders
Source: Springer Nature journal article supplement (doi:10.1007/s10618-015-0410-5), 2015-03-20
Supplement: MOESM5 [file 11710956]

**A Computational Approach inspired by Simulated Annealing to study the Stability of Protein Interaction Networks in Cancer and Neurological Disorders**

Data Mining and Knowledge Discovery

Kristina Ibáñez<sup>1,2</sup>, María Guijarro<sup>1</sup>, Gonzalo Pajares<sup>1</sup>, Alfonso Valencia<sup>2,§</sup>

<sup>1</sup>Departamento Ingeniería del Software e Inteligencia Artificial, Facultad Informática, Universidad Complutense, 28040 Madrid, Spain

<sup>2</sup>Structural Biology and Biocomputing Programme, Spanish National Cancer Research Centre (CNIO), 28029 Madrid , Spain

<sup>§</sup> **Corresponding author:** Dr. Alfonso Valencia. Tel: +34 917328000; Fax: +34 912246976;  
E-mail: avalencia@cni.es

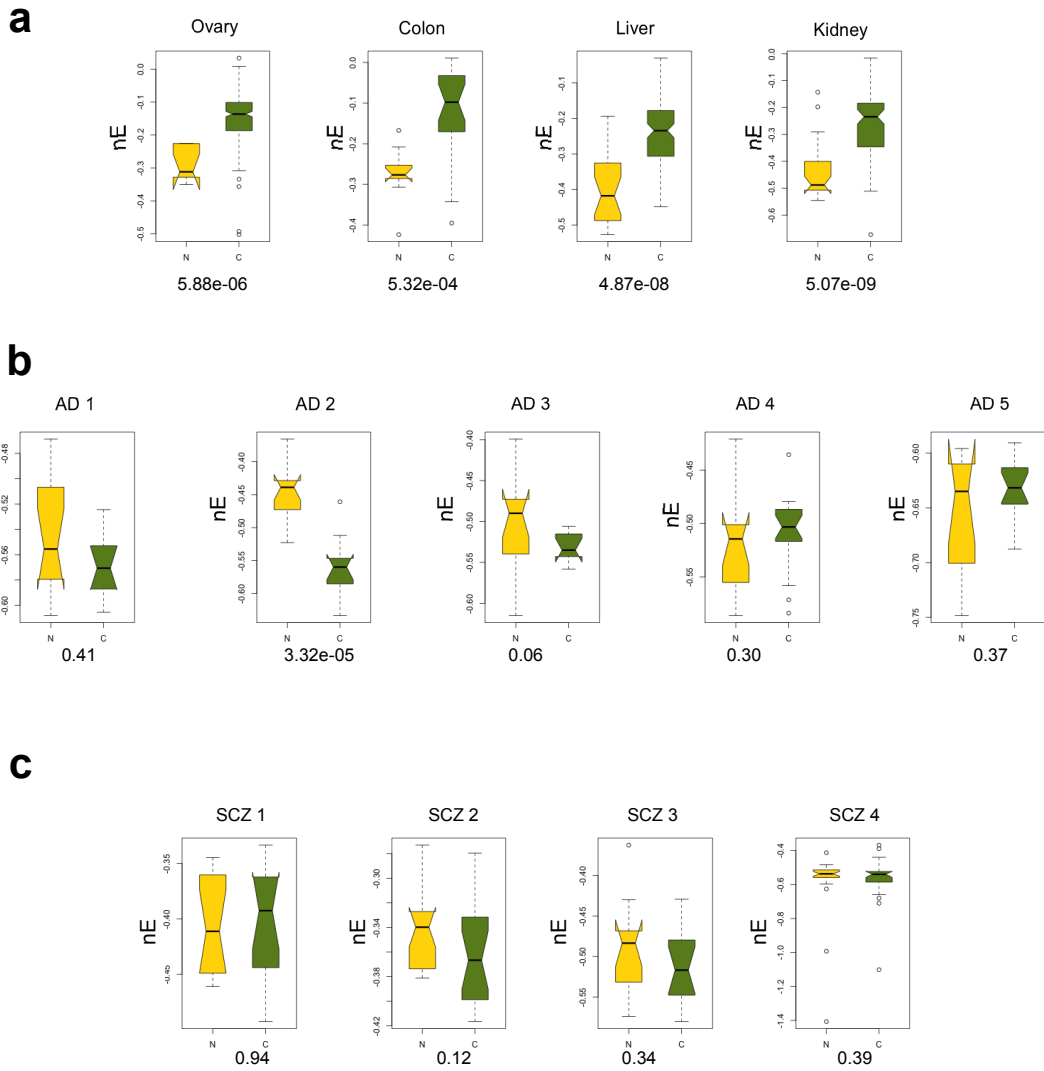

**Online Resource 5**  $nE$  distribution mapping all the genes in **(a)** normal (N) and cancer (C) states (Ovarian, Colon, Liver and Kidney). **(b)** Normal (N) and AD (C). **(c)** Normal (N) and SCZ disease (C) state in the HIPPIE network. The Wilcoxon-rank p-value

value is presented below x-axis
